# Supplementary material
Source: Research Square preprint supplement (doi:10.21203/rs.3.rs-8738572/v1)
Supplement: Supplementary file 3 [file 8dc112ef9066a926e3a88d15.xlsx]

## Sheet: Legends
Abbreviation	Description
WT1_F_Cortex	Wildtype Cortex sample 1, Female
WT2_F_Cortex	Wildtype Cortex sample 2, Female
WT3_M_Cortex	Wildtype Cortex sample 3, Male
KI1_F_Cortex	SIK1 KI Cortex sample 1, Female
KI2_M_Cortex	SIK1 KI Cortex sample 2, Male
KI4_F_Cortex	SIK1 KI Cortex sample 3, Female

## Sheet: Sheet Description
Sheet	Description
Cortex Raw Counts	Raw counts for Cortex Transcriptomics
Cortex DESeq Results	Statistical analysis of Cortex bulkRNA transcriptomics via DESeq

## Sheet: Cortex Raw Counts
	Geneid	WT1_F_Cortex	WT2_F_Cortex	WT3_M_Cortex	KI1_F_Cortex	KI2_M_Cortex	KI4_F_Cortex
1	ENSMUSG00000102693.1	0	0	0	0	0	0
2	ENSMUSG00000064842.1	0	0	0	0	0	0
3	ENSMUSG00000051951.5	417	204	720	658	811	742
4	ENSMUSG00000102851.1	0	0	0	0	1	0
5	ENSMUSG00000103377.1	0	0	3	2	0	1
6	ENSMUSG00000104017.1	0	0	5	0	3	3
7	ENSMUSG00000103025.1	0	0	1	0	1	0
8	ENSMUSG00000089699.1	0	0	0	0	0	0
9	ENSMUSG00000103201.1	0	0	1	0	5	0
10	ENSMUSG00000103147.1	0	0	2	0	1	0
11	ENSMUSG00000103161.1	2	0	4	2	1	6
12	ENSMUSG00000102331.1	9	0	12	11	13	13
13	ENSMUSG00000102348.1	2	0	7	3	10	13
14	ENSMUSG00000102592.1	0	0	0	0	0	0
15	ENSMUSG00000088333.2	0	0	0	0	0	0
16	ENSMUSG00000102343.1	0	0	0	0	0	0
17	ENSMUSG00000025900.13	0	0	0	7	2	9
18	ENSMUSG00000102948.1	0	0	0	0	0	0
19	ENSMUSG00000104123.1	0	0	0	0	0	0
20	ENSMUSG00000025902.13	99	16	38	71	87	81
21	ENSMUSG00000104238.1	0	1	1	0	0	3
22	ENSMUSG00000102269.1	3	0	3	8	2	4
23	ENSMUSG00000096126.1	0	0	0	1	0	0
24	ENSMUSG00000103003.1	0	0	1	0	0	0
25	ENSMUSG00000104328.1	0	0	0	0	0	0
26	ENSMUSG00000102735.1	0	0	0	0	0	0
27	ENSMUSG00000098104.1	5	4	10	12	16	17
28	ENSMUSG00000102175.1	1	2	0	0	0	0
29	ENSMUSG00000088000.1	0	0	0	0	0	0
30	ENSMUSG00000103265.1	0	0	0	1	0	0
31	ENSMUSG00000103922.1	6	0	0	7	5	4
32	ENSMUSG00000033845.13	455	156	452	388	582	567
33	ENSMUSG00000102275.1	24	5	13	2	21	12
34	ENSMUSG00000025903.14	377	92	363	307	503	427
35	ENSMUSG00000104217.1	0	0	0	0	0	0
36	ENSMUSG00000033813.15	810	232	790	818	1018	1000
37	ENSMUSG00000062588.4	10	6	16	23	23	21
38	ENSMUSG00000103280.1	48	24	45	49	53	61
39	ENSMUSG00000002459.17	580	170	371	650	560	581
40	ENSMUSG00000091305.1	0	1	0	0	0	1
41	ENSMUSG00000102653.1	0	2	1	5	1	0
42	ENSMUSG00000085623.1	1	1	0	0	0	0
43	ENSMUSG00000091665.1	0	0	0	0	0	0
44	ENSMUSG00000033793.12	2591	982	2950	2479	3286	3498
45	ENSMUSG00000104352.1	0	0	0	0	0	0
46	ENSMUSG00000104046.1	0	0	0	0	1	0
47	ENSMUSG00000102907.1	0	0	0	0	0	0
48	ENSMUSG00000025905.14	18	22	108	35	28	63
49	ENSMUSG00000103936.1	0	0	0	0	0	0
50	ENSMUSG00000093015.1	0	0	0	0	0	0
51	ENSMUSG00000103519.1	0	0	0	0	0	0
52	ENSMUSG00000033774.4	7	8	25	6	13	14
53	ENSMUSG00000103090.1	0	0	0	0	0	0
54	ENSMUSG00000025907.14	1822	637	2287	2288	2683	2594
55	ENSMUSG00000090031.2	116	25	93	82	108	87
56	ENSMUSG00000087247.3	0	0	0	0	0	0
57	ENSMUSG00000103355.1	0	0	0	0	2	1
58	ENSMUSG00000102706.1	0	0	0	0	0	0
59	ENSMUSG00000103845.1	22	5	26	34	64	49
60	ENSMUSG00000033740.17	78	38	144	86	119	107
61	ENSMUSG00000103329.2	3	0	10	8	8	1
62	ENSMUSG00000104385.1	0	0	0	0	0	0
63	ENSMUSG00000102135.1	1	0	0	4	6	3
64	ENSMUSG00000103282.1	0	0	0	0	0	0
65	ENSMUSG00000102534.1	0	0	0	0	0	0
66	ENSMUSG00000102213.1	0	0	0	0	0	0
67	ENSMUSG00000103629.1	0	0	0	0	0	0
68	ENSMUSG00000051285.17	2393	729	2733	2825	3804	3129
69	ENSMUSG00000098201.1	0	0	2	3	4	0
70	ENSMUSG00000103509.1	59	29	146	126	166	112
71	ENSMUSG00000048538.7	2	5	13	17	20	22
72	ENSMUSG00000103709.1	0	0	0	0	0	0
73	ENSMUSG00000077244.1	0	0	0	0	0	0
74	ENSMUSG00000102768.1	0	0	0	0	0	0
75	ENSMUSG00000097797.6	24	10	27	14	23	23
76	ENSMUSG00000103498.1	0	0	0	0	0	0
77	ENSMUSG00000103067.1	0	0	1	0	0	0
78	ENSMUSG00000102320.1	0	0	0	0	0	0
79	ENSMUSG00000104226.1	0	0	0	0	0	0
80	ENSMUSG00000103903.1	0	0	0	0	0	0
81	ENSMUSG00000103557.1	0	0	0	0	0	0
82	ENSMUSG00000025909.16	626	214	755	793	1081	995
83	ENSMUSG00000102647.1	8	0	7	2	10	2
84	ENSMUSG00000086235.1	0	0	0	0	0	0
85	ENSMUSG00000102253.1	0	0	0	0	1	4
86	ENSMUSG00000093970.1	0	0	0	0	0	0
87	ENSMUSG00000103884.1	0	0	2	5	0	0
88	ENSMUSG00000084353.1	3	0	0	0	1	2
89	ENSMUSG00000103933.1	2	0	0	0	3	0
90	ENSMUSG00000076135.1	0	0	0	0	0	0
91	ENSMUSG00000086195.1	0	0	0	0	0	0
92	ENSMUSG00000104504.1	0	0	0	0	0	0
93	ENSMUSG00000066693.2	0	0	0	1	0	0
94	ENSMUSG00000102316.1	0	0	0	5	6	0
95	ENSMUSG00000103819.1	0	0	0	0	0	0
96	ENSMUSG00000102871.1	1	0	0	0	4	0
97	ENSMUSG00000101571.2	0	0	0	0	0	0
98	ENSMUSG00000104428.1	0	0	0	0	0	0
99	ENSMUSG00000102272.1	0	0	0	0	0	0
100	ENSMUSG00000065625.1	0	0	0	0	0	0
101	ENSMUSG00000103411.1	1	0	0	0	4	0
102	ENSMUSG00000061024.8	287	70	310	303	398	389
103	ENSMUSG00000025911.14	294	69	215	336	369	364
104	ENSMUSG00000079671.8	31	20	76	48	43	63
105	ENSMUSG00000081441.3	7	0	2	4	8	10
106	ENSMUSG00000067879.3	4759	2072	8671	4553	4869	6238
107	ENSMUSG00000099827.1	0	0	0	0	0	0
108	ENSMUSG00000025912.16	93	26	122	124	146	132
109	ENSMUSG00000045210.8	1572	512	1802	1510	2014	1898
110	ENSMUSG00000097893.8	0	0	6	0	7	0
111	ENSMUSG00000025915.14	301	65	242	270	270	317
112	ENSMUSG00000046334.4	1	0	5	1	3	1
113	ENSMUSG00000088916.1	0	0	0	1	0	0
114	ENSMUSG00000046101.16	66	24	58	61	76	96
115	ENSMUSG00000098234.7	80	35	78	94	118	132
116	ENSMUSG00000093178.1	2	0	0	2	2	0
117	ENSMUSG00000099032.2	10	4	4	12	5	4
118	ENSMUSG00000104025.1	0	0	0	0	1	0
119	ENSMUSG00000025916.10	13	5	4	7	7	5
120	ENSMUSG00000087199.1	0	0	0	0	0	0
121	ENSMUSG00000095780.1	0	0	0	0	0	0
122	ENSMUSG00000025917.9	1008	372	1089	998	1421	1323
123	ENSMUSG00000056763.16	605	203	759	798	1025	852
124	ENSMUSG00000102356.1	0	0	0	0	0	0
125	ENSMUSG00000067851.11	2331	776	2715	2548	3148	3116
126	ENSMUSG00000088153.1	0	0	7	2	0	0
127	ENSMUSG00000102556.1	0	0	0	1	1	1
128	ENSMUSG00000042501.12	5	0	6	2	1	3
129	ENSMUSG00000103810.1	0	0	0	0	0	0
130	ENSMUSG00000083422.1	0	0	0	0	0	0
131	ENSMUSG00000094979.1	0	0	0	0	0	0
132	ENSMUSG00000081417.1	0	0	0	0	0	0
133	ENSMUSG00000103448.1	0	0	0	0	0	0
134	ENSMUSG00000100212.1	0	0	0	0	0	0
135	ENSMUSG00000100648.1	0	0	0	0	0	0
136	ENSMUSG00000088585.1	0	0	0	0	0	0
137	ENSMUSG00000048960.13	1341	485	1112	1552	1965	1626
138	ENSMUSG00000077318.1	0	0	0	0	0	0
139	ENSMUSG00000101827.1	0	0	0	0	0	0
140	ENSMUSG00000103494.1	0	0	0	0	0	0
141	ENSMUSG00000057715.13	1578	466	2319	1736	2549	1966
142	ENSMUSG00000103825.1	0	0	0	2	1	0
143	ENSMUSG00000099845.1	0	0	0	0	0	3
144	ENSMUSG00000103561.1	0	0	0	0	0	0
145	ENSMUSG00000101610.1	0	0	0	0	0	0
146	ENSMUSG00000093864.1	0	0	0	0	0	0
147	ENSMUSG00000098555.1	0	0	0	0	0	0
148	ENSMUSG00000097628.1	9	1	11	4	11	2
149	ENSMUSG00000098163.1	0	0	0	0	0	0
150	ENSMUSG00000097171.1	0	0	0	0	0	0
151	ENSMUSG00000101314.1	0	0	0	0	0	0
152	ENSMUSG00000016918.15	229	52	234	142	115	131
153	ENSMUSG00000025938.16	48	25	78	97	98	90
154	ENSMUSG00000104518.1	0	0	0	0	0	0
155	ENSMUSG00000069620.6	0	0	0	0	0	0
156	ENSMUSG00000099498.1	0	0	0	0	0	0
157	ENSMUSG00000042414.7	0	0	0	0	0	0
158	ENSMUSG00000005886.14	2612	874	2656	2865	3506	3454
159	ENSMUSG00000103506.1	2	1	5	0	2	2
160	ENSMUSG00000103495.1	0	0	1	0	0	0
161	ENSMUSG00000099183.1	0	0	0	0	1	0
162	ENSMUSG00000102639.1	1	0	3	0	1	0
163	ENSMUSG00000104170.1	0	6	1	4	2	0
164	ENSMUSG00000087782.1	0	0	2	0	2	0
165	ENSMUSG00000103085.1	2	3	9	5	6	3
166	ENSMUSG00000102664.1	2	0	0	6	3	2
167	ENSMUSG00000101476.1	0	1	1	0	4	1
168	ENSMUSG00000101171.1	0	0	1	0	0	0
169	ENSMUSG00000025935.10	518	149	365	543	538	552
170	ENSMUSG00000025937.6	358	126	421	432	498	549
171	ENSMUSG00000102982.1	4	0	4	4	1	1
172	ENSMUSG00000067813.3	0	0	0	0	0	4
173	ENSMUSG00000077368.1	0	0	0	0	0	0
174	ENSMUSG00000097711.1	0	1	0	0	0	0
175	ENSMUSG00000102166.1	0	0	0	2	0	0
176	ENSMUSG00000089358.1	0	0	0	0	0	0
177	ENSMUSG00000104209.1	0	0	0	0	0	0
178	ENSMUSG00000025932.14	250	59	146	231	243	251
179	ENSMUSG00000095853.1	0	0	0	0	3	0
180	ENSMUSG00000102588.1	0	1	0	0	0	0
181	ENSMUSG00000054493.2	22	4	30	19	26	17
182	ENSMUSG00000025930.6	16	18	23	25	42	33
183	ENSMUSG00000103492.1	30	14	19	38	52	35
184	ENSMUSG00000081201.1	11	0	10	6	8	8
185	ENSMUSG00000082193.1	8	2	3	2	5	4
186	ENSMUSG00000032769.5	2	5	2	5	5	3
187	ENSMUSG00000088159.1	0	0	0	0	0	0
188	ENSMUSG00000073737.3	64	31	92	64	95	86
189	ENSMUSG00000092083.4	956	340	775	817	1141	903
190	ENSMUSG00000102937.1	0	0	7	0	2	0
191	ENSMUSG00000104149.1	1	0	0	0	1	1
192	ENSMUSG00000088829.1	0	2	0	0	0	0
193	ENSMUSG00000077377.1	2	0	0	0	0	0
194	ENSMUSG00000101652.1	0	0	0	0	0	0
195	ENSMUSG00000100814.1	0	0	0	0	0	0
196	ENSMUSG00000025925.14	183	60	140	196	185	239
197	ENSMUSG00000104379.1	10	7	18	18	19	31
198	ENSMUSG00000032719.4	10	1	29	6	8	20
199	ENSMUSG00000088943.1	0	0	0	0	0	0
200	ENSMUSG00000100652.1	0	0	0	0	0	0
201	ENSMUSG00000067795.13	11	1	4	9	3	7
202	ENSMUSG00000043716.13	3272	1010	3174	3490	4903	4216
203	ENSMUSG00000025921.7	146	38	152	206	226	250
204	ENSMUSG00000104165.1	2	1	2	3	4	1
205	ENSMUSG00000100868.1	4	1	5	4	0	3
206	ENSMUSG00000025920.19	3331	1129	3157	3508	4193	4112
207	ENSMUSG00000089982.7	3	3	1	0	11	0
208	ENSMUSG00000025939.19	859	269	860	848	1057	1040
209	ENSMUSG00000102457.1	2	3	5	3	9	3
210	ENSMUSG00000079658.9	1845	609	2186	2165	3140	2642
211	ENSMUSG00000097744.1	0	0	0	0	0	0
212	ENSMUSG00000100959.1	0	0	0	0	0	0
213	ENSMUSG00000025940.6	464	169	449	388	639	562
214	ENSMUSG00000025779.10	6	5	23	22	17	18
215	ENSMUSG00000100093.1	0	0	0	0	0	0
216	ENSMUSG00000091020.3	0	1	6	9	2	1
217	ENSMUSG00000101640.1	0	0	0	0	0	0
218	ENSMUSG00000104133.1	0	0	0	0	0	0
219	ENSMUSG00000042686.5	479	140	343	461	424	531
220	ENSMUSG00000100110.1	0	0	0	0	0	0
221	ENSMUSG00000025777.8	2198	676	2586	2362	3102	2805
222	ENSMUSG00000099899.1	8	0	2	3	8	15
223	ENSMUSG00000100272.1	0	0	0	0	0	0
224	ENSMUSG00000100398.1	1	0	2	0	0	0
225	ENSMUSG00000101589.1	22	3	20	13	27	21
226	ENSMUSG00000102048.1	0	0	0	0	0	0
227	ENSMUSG00000089534.1	0	0	0	0	0	0
228	ENSMUSG00000067780.3	4	3	12	23	7	8
229	ENSMUSG00000100053.1	13	3	11	13	31	13
230	ENSMUSG00000085125.7	12	1	21	20	16	43
231	ENSMUSG00000025776.13	128	47	90	140	169	211
232	ENSMUSG00000099895.1	1	3	1	2	11	1
233	ENSMUSG00000100554.1	5	1	2	1	2	0
234	ENSMUSG00000099473.1	0	0	0	0	0	0
235	ENSMUSG00000099591.1	0	0	2	0	0	1
236	ENSMUSG00000109887.1	40	11	37	33	49	46
237	ENSMUSG00000102001.1	0	0	0	0	0	0
238	ENSMUSG00000101717.2	0	0	0	0	0	0
239	ENSMUSG00000025774.14	0	0	0	0	0	0
240	ENSMUSG00000070977.4	0	0	0	0	0	0
241	ENSMUSG00000073735.1	0	0	0	0	0	0
242	ENSMUSG00000067773.6	0	0	0	0	0	0
243	ENSMUSG00000101685.1	0	0	0	0	0	0
244	ENSMUSG00000101306.1	0	0	0	0	0	0
245	ENSMUSG00000088800.1	0	0	0	0	0	0
246	ENSMUSG00000101644.1	0	0	0	0	0	0
247	ENSMUSG00000099433.1	0	0	0	0	0	0
248	ENSMUSG00000089787.2	2	0	0	0	0	0
249	ENSMUSG00000042596.7	0	0	1	2	1	0
250	ENSMUSG00000100720.1	3	1	5	2	9	7
251	ENSMUSG00000025927.13	46	5	3	61	53	49
252	ENSMUSG00000100538.1	0	0	0	0	0	0
253	ENSMUSG00000101117.1	0	0	0	0	0	0
254	ENSMUSG00000100204.1	2	1	5	1	2	1
255	ENSMUSG00000084668.1	0	0	0	0	0	0
256	ENSMUSG00000102597.1	0	0	0	0	0	0
257	ENSMUSG00000043760.16	1	3	1	8	8	4
258	ENSMUSG00000104095.1	0	0	0	0	0	0
259	ENSMUSG00000089914.2	10	1	1	1	1	4
260	ENSMUSG00000090142.2	0	0	0	0	0	0
261	ENSMUSG00000070175.1	0	0	0	0	0	0
262	ENSMUSG00000099906.2	0	0	3	1	0	0
263	ENSMUSG00000065559.1	0	0	0	0	0	0
264	ENSMUSG00000065480.1	0	0	0	0	0	0
265	ENSMUSG00000025929.4	0	0	0	0	0	0
266	ENSMUSG00000041872.9	1	0	0	0	0	0
267	ENSMUSG00000041859.10	42	17	36	51	58	47
268	ENSMUSG00000099714.1	0	0	0	0	0	0
269	ENSMUSG00000102121.1	0	0	0	0	0	0
270	ENSMUSG00000088858.1	0	0	0	0	0	0
271	ENSMUSG00000097934.1	12	1	9	9	10	10
272	ENSMUSG00000025931.15	2825	856	2779	3369	3822	4077
273	ENSMUSG00000077314.1	0	0	0	0	0	0
274	ENSMUSG00000100929.1	6	0	8	8	11	18
275	ENSMUSG00000041809.5	25	6	21	26	31	32
276	ENSMUSG00000041779.5	52	13	33	48	71	62
277	ENSMUSG00000099971.1	0	0	0	0	0	0
278	ENSMUSG00000100819.1	4	2	5	2	4	1
279	ENSMUSG00000025933.15	719	215	617	848	1005	945
280	ENSMUSG00000102633.1	4	0	2	1	1	2
281	ENSMUSG00000025934.15	49	18	42	60	61	47
282	ENSMUSG00000099343.1	5	1	6	1	3	2
283	ENSMUSG00000096375.2	0	3	3	0	1	6
284	ENSMUSG00000025936.15	0	0	0	0	0	0
285	ENSMUSG00000093963.1	0	0	0	0	0	0
286	ENSMUSG00000067750.3	0	0	0	0	0	0
287	ENSMUSG00000086194.1	0	0	0	0	0	0
288	ENSMUSG00000094436.1	0	0	0	0	0	0
289	ENSMUSG00000041722.7	5	0	7	0	0	2
290	ENSMUSG00000085507.1	5	1	0	1	1	1
291	ENSMUSG00000094926.1	1	0	0	0	0	1
292	ENSMUSG00000085079.3	0	0	0	3	0	4
293	ENSMUSG00000085679.2	0	0	1	0	0	0
294	ENSMUSG00000028033.16	3394	1230	3293	3882	4021	4020
295	ENSMUSG00000104138.1	1	0	0	5	2	1
296	ENSMUSG00000082935.3	44	15	66	41	50	58
297	ENSMUSG00000103748.1	0	1	4	1	10	3
298	ENSMUSG00000099692.1	0	0	0	0	0	0
299	ENSMUSG00000100418.1	0	0	0	0	0	0
300	ENSMUSG00000041670.17	6343	2198	6989	7457	9230	8064
301	ENSMUSG00000097642.1	0	0	0	0	1	1
302	ENSMUSG00000101468.1	1	0	0	0	0	1
303	ENSMUSG00000101227.1	10	1	7	13	7	15
304	ENSMUSG00000073730.2	0	0	3	0	2	0
305	ENSMUSG00000089553.1	0	0	0	0	0	0
306	ENSMUSG00000102766.1	0	0	0	0	0	1
307	ENSMUSG00000065405.3	0	0	0	0	0	0
308	ENSMUSG00000097970.1	9	1	13	4	5	4
309	ENSMUSG00000065567.1	0	0	0	0	0	0
310	ENSMUSG00000100775.1	0	0	0	0	0	1
311	ENSMUSG00000101226.1	0	0	0	0	0	0
312	ENSMUSG00000026158.11	2273	754	2791	2273	3013	2783
313	ENSMUSG00000097920.1	0	0	0	0	0	0
314	ENSMUSG00000099503.1	0	0	0	0	0	0
315	ENSMUSG00000026156.8	94	36	86	101	109	98
316	ENSMUSG00000026155.13	581	215	747	633	720	742
317	ENSMUSG00000026154.4	142	38	154	136	164	153
318	ENSMUSG00000102495.1	1	0	0	0	1	0
319	ENSMUSG00000026153.15	755	270	852	827	1167	962
320	ENSMUSG00000102398.1	3	4	4	4	13	8
321	ENSMUSG00000097670.1	0	0	0	0	0	0
322	ENSMUSG00000026147.16	17	6	13	18	34	23
323	ENSMUSG00000026141.13	811	256	895	1060	1051	1175
324	ENSMUSG00000077463.1	0	0	0	0	0	0
325	ENSMUSG00000099997.1	22	7	6	10	8	19
326	ENSMUSG00000100131.1	1652	308	1129	2777	2949	1066
327	ENSMUSG00000067736.2	371	74	249	714	422	294
328	ENSMUSG00000101939.1	191	35	154	140	203	160
329	ENSMUSG00000101111.1	2087	563	1660	2131	2730	1854
330	ENSMUSG00000100862.1	3619	773	2168	4773	7834	2765
331	ENSMUSG00000102070.1	2724	763	2334	2999	4762	2113
332	ENSMUSG00000101249.1	3132	1220	4563	2826	4267	3757
333	ENSMUSG00000073725.8	4006	1284	4302	4361	5391	5279
334	ENSMUSG00000100808.1	0	0	0	0	0	0
335	ENSMUSG00000100483.1	0	0	0	0	0	0
336	ENSMUSG00000100450.1	0	0	0	0	1	0
337	ENSMUSG00000099392.1	0	0	0	0	0	0
338	ENSMUSG00000033569.17	1867	726	2125	2097	2493	2457
339	ENSMUSG00000080849.1	0	0	2	0	0	0
340	ENSMUSG00000104257.1	0	0	1	0	0	1
341	ENSMUSG00000096866.1	0	1	0	0	0	0
342	ENSMUSG00000102296.1	0	0	1	0	1	0
343	ENSMUSG00000103209.1	0	0	7	2	2	0
344	ENSMUSG00000104027.1	3	6	1	3	2	1
345	ENSMUSG00000102407.1	0	0	2	2	0	1
346	ENSMUSG00000103214.1	5	1	7	1	2	1
347	ENSMUSG00000104100.1	2	0	3	10	2	2
348	ENSMUSG00000084740.1	0	0	0	0	0	0
349	ENSMUSG00000103889.1	2	0	1	1	0	6
350	ENSMUSG00000101301.1	0	0	1	0	0	2
351	ENSMUSG00000104221.1	0	1	2	1	1	5
352	ENSMUSG00000102250.1	0	3	4	5	3	1
353	ENSMUSG00000102317.1	0	0	8	1	4	3
354	ENSMUSG00000103563.1	5	0	4	3	2	0
355	ENSMUSG00000102465.1	7	2	12	3	10	10
356	ENSMUSG00000102659.1	0	0	4	6	5	0
357	ENSMUSG00000103924.1	0	0	15	1	3	3
358	ENSMUSG00000104132.1	0	2	6	5	7	4
359	ENSMUSG00000102747.1	0	0	5	5	0	5
360	ENSMUSG00000102386.1	1	0	7	5	1	0
361	ENSMUSG00000103004.1	0	0	1	0	0	0
362	ENSMUSG00000104516.1	18	4	17	19	11	22
363	ENSMUSG00000101618.1	0	0	0	0	0	0
364	ENSMUSG00000099458.1	0	0	0	0	0	0
365	ENSMUSG00000088111.1	0	0	0	0	0	0
366	ENSMUSG00000073722.3	0	0	0	0	0	0
367	ENSMUSG00000095256.1	0	0	0	0	0	0
368	ENSMUSG00000100310.1	0	0	0	0	0	0
369	ENSMUSG00000101514.1	0	0	0	0	0	0
370	ENSMUSG00000101033.1	0	0	0	0	0	0
371	ENSMUSG00000101372.1	0	0	0	0	0	0
372	ENSMUSG00000103241.1	0	0	0	0	0	0
373	ENSMUSG00000086240.4	14	2	11	7	18	25
374	ENSMUSG00000048411.4	0	0	0	0	0	0
375	ENSMUSG00000081557.2	0	0	3	1	0	1
376	ENSMUSG00000058590.2	0	0	0	0	0	0
377	ENSMUSG00000101235.1	0	0	0	0	0	0
378	ENSMUSG00000064433.1	0	0	0	0	0	0
379	ENSMUSG00000080625.1	0	0	0	0	0	0
380	ENSMUSG00000080391.1	0	0	0	0	0	0
381	ENSMUSG00000099257.1	0	0	0	0	0	0
382	ENSMUSG00000099492.1	4	3	2	5	0	4
383	ENSMUSG00000118548.1	0	0	0	0	0	0
384	ENSMUSG00000101726.1	0	0	0	0	0	0
385	ENSMUSG00000096829.1	0	0	0	0	0	0
386	ENSMUSG00000098883.1	0	0	0	0	0	0
387	ENSMUSG00000053185.2	0	0	4	0	1	0
388	ENSMUSG00000100261.1	16	3	19	16	13	26
389	ENSMUSG00000101180.1	0	0	0	0	0	0
390	ENSMUSG00000048874.15	1991	570	2008	2313	2337	2447
391	ENSMUSG00000103783.1	0	0	3	0	14	0
392	ENSMUSG00000104315.1	0	0	0	3	2	3
393	ENSMUSG00000026064.16	5	1	3	11	11	10
394	ENSMUSG00000117310.2	0	0	0	0	0	0
395	ENSMUSG00000117091.1	0	0	0	0	0	0
396	ENSMUSG00000086726.3	0	0	0	0	0	0
397	ENSMUSG00000086727.8	1	0	0	0	0	1
398	ENSMUSG00000100237.1	0	0	0	0	0	0
399	ENSMUSG00000098529.1	0	0	0	0	0	0
400	ENSMUSG00000100910.1	0	0	0	0	0	0
401	ENSMUSG00000099796.1	0	0	0	0	0	0
402	ENSMUSG00000050217.13	0	0	0	0	0	0
403	ENSMUSG00000026063.4	0	0	0	0	0	0
404	ENSMUSG00000077664.1	0	0	0	0	0	0
405	ENSMUSG00000100205.1	0	0	0	0	0	0
406	ENSMUSG00000100592.1	0	0	0	0	0	0
407	ENSMUSG00000094215.2	0	0	0	0	0	0
408	ENSMUSG00000101093.1	0	0	0	0	0	0
409	ENSMUSG00000070960.4	22	7	15	24	12	14
410	ENSMUSG00000088620.1	0	0	0	0	0	0
411	ENSMUSG00000082159.2	0	0	0	0	0	0
412	ENSMUSG00000026058.11	138	44	144	170	187	219
413	ENSMUSG00000064688.1	0	0	0	0	0	0
414	ENSMUSG00000103482.1	2	0	4	1	5	1
415	ENSMUSG00000104498.1	1	1	0	0	0	0
416	ENSMUSG00000104313.1	0	0	0	1	0	0
417	ENSMUSG00000102865.1	3	0	2	9	0	2
418	ENSMUSG00000102321.1	1	0	3	5	12	0
419	ENSMUSG00000091318.2	5	0	7	6	11	5
420	ENSMUSG00000089489.1	0	0	0	0	0	0
421	ENSMUSG00000104433.1	1	0	9	5	3	3
422	ENSMUSG00000089395.1	0	0	0	0	0	0
423	ENSMUSG00000102926.1	0	0	0	0	0	0
424	ENSMUSG00000100497.1	0	0	0	0	0	0
425	ENSMUSG00000102917.1	1	2	4	0	1	1
426	ENSMUSG00000100481.1	2	1	8	2	3	4
427	ENSMUSG00000100590.1	0	0	0	0	0	1
428	ENSMUSG00000088750.1	0	0	0	0	0	0
429	ENSMUSG00000104230.1	0	0	0	0	0	0
430	ENSMUSG00000101754.2	0	0	0	0	0	0
431	ENSMUSG00000065223.1	0	0	0	0	0	0
432	ENSMUSG00000100318.2	0	0	0	0	0	0
433	ENSMUSG00000101612.2	0	0	1	0	0	0
434	ENSMUSG00000065260.1	0	0	0	0	0	0
435	ENSMUSG00000026134.11	130	38	134	147	177	139
436	ENSMUSG00000101682.1	0	0	0	0	0	0
437	ENSMUSG00000102714.1	0	0	0	0	2	0
438	ENSMUSG00000102093.1	0	0	0	0	0	0
439	ENSMUSG00000103746.1	2	0	1	3	0	6
440	ENSMUSG00000102198.1	0	0	1	1	0	0
441	ENSMUSG00000004768.14	474	133	507	554	649	721
442	ENSMUSG00000042215.8	139	50	147	196	191	166
443	ENSMUSG00000103072.1	0	0	0	0	0	0
444	ENSMUSG00000042197.13	1256	411	1232	1344	1553	1649
445	ENSMUSG00000081402.4	9	0	3	6	2	6
446	ENSMUSG00000042182.16	3167	1130	4060	3756	5663	4592
447	ENSMUSG00000104416.1	19	8	16	37	34	36
448	ENSMUSG00000026131.20	10604	3512	13469	13190	14383	15734
449	ENSMUSG00000103596.1	0	0	2	0	0	0
450	ENSMUSG00000099382.1	0	0	0	0	0	0
451	ENSMUSG00000084506.1	0	0	0	0	0	0
452	ENSMUSG00000103364.1	0	0	0	0	1	3
453	ENSMUSG00000105982.1	0	0	0	0	0	0
454	ENSMUSG00000096992.3	4	2	25	16	15	7
455	ENSMUSG00000103001.1	0	0	2	0	8	0
456	ENSMUSG00000104397.1	0	0	0	0	0	0
457	ENSMUSG00000102839.1	0	0	1	3	2	1
458	ENSMUSG00000101206.1	0	0	0	0	0	0
459	ENSMUSG00000101462.2	23	8	17	21	13	22
460	ENSMUSG00000102336.1	118	42	122	119	84	120
461	ENSMUSG00000092852.1	0	0	0	0	0	0
462	ENSMUSG00000042111.9	276	93	262	346	285	379
463	ENSMUSG00000101711.1	0	0	2	3	1	1
464	ENSMUSG00000026127.13	430	113	495	483	504	582
465	ENSMUSG00000026126.15	23	6	10	15	12	15
466	ENSMUSG00000100280.2	4	0	5	5	5	0
467	ENSMUSG00000101223.6	0	0	1	1	3	2
468	ENSMUSG00000026125.9	0	0	0	0	0	0
469	ENSMUSG00000101116.1	0	0	0	0	0	0
470	ENSMUSG00000026124.4	0	0	0	0	0	0
471	ENSMUSG00000101803.1	0	0	0	0	0	0
472	ENSMUSG00000037529.13	0	0	0	0	0	0
473	ENSMUSG00000045815.4	0	0	0	0	0	0
474	ENSMUSG00000045174.10	700	269	759	905	863	1027
475	ENSMUSG00000100524.1	0	0	0	0	0	0
476	ENSMUSG00000102499.1	0	0	0	0	0	0
477	ENSMUSG00000103521.1	0	0	0	0	0	2
478	ENSMUSG00000104098.1	0	0	0	0	0	0
479	ENSMUSG00000037509.21	3074	1044	3248	3428	4192	4484
480	ENSMUSG00000102537.1	3	0	1	2	0	5
481	ENSMUSG00000102612.1	1	0	0	0	0	0
482	ENSMUSG00000118272.1	0	0	0	0	0	0
483	ENSMUSG00000104002.2	32	11	74	81	99	89
484	ENSMUSG00000037503.12	7715	2347	8580	8502	10413	10068
485	ENSMUSG00000104358.1	39	13	19	40	43	46
486	ENSMUSG00000026123.11	5261	1784	5350	5399	6747	6511
487	ENSMUSG00000103716.1	0	0	0	0	0	0
488	ENSMUSG00000103548.1	1	0	0	0	1	1
489	ENSMUSG00000103760.1	0	0	0	0	0	0
490	ENSMUSG00000103997.1	0	0	0	0	0	0
491	ENSMUSG00000077231.1	0	0	0	0	0	0
492	ENSMUSG00000104417.1	2	0	0	0	2	0
493	ENSMUSG00000064601.1	0	0	0	0	0	0
494	ENSMUSG00000101714.1	0	0	0	0	0	0
495	ENSMUSG00000102531.1	11	0	9	2	4	7
496	ENSMUSG00000103096.1	0	0	0	0	0	0
497	ENSMUSG00000102279.1	0	0	0	0	0	0
498	ENSMUSG00000103708.1	0	0	0	1	0	1
499	ENSMUSG00000104201.1	0	0	0	0	0	0
500	ENSMUSG00000102434.1	1	1	4	3	0	0
501	ENSMUSG00000045216.7	1159	345	1091	1286	1352	1447
502	ENSMUSG00000104523.1	0	0	0	0	0	0
503	ENSMUSG00000102202.1	3	1	10	6	5	9
504	ENSMUSG00000037470.14	1569	510	1484	1631	1683	1720
505	ENSMUSG00000098752.1	0	0	0	0	0	1
506	ENSMUSG00000047180.8	22	13	18	26	26	30
507	ENSMUSG00000037447.16	189	56	131	215	207	265
508	ENSMUSG00000102762.1	3	0	2	1	2	1
509	ENSMUSG00000010453.12	1581	556	1858	1873	2123	2243
510	ENSMUSG00000098680.1	0	0	0	0	0	0
511	ENSMUSG00000037432.15	174	53	186	212	214	214
512	ENSMUSG00000001143.13	607	190	551	633	614	783
513	ENSMUSG00000037408.10	322	82	266	270	229	317
514	ENSMUSG00000104316.1	0	0	1	0	0	0
515	ENSMUSG00000106081.1	0	0	0	0	0	0
516	ENSMUSG00000001138.13	553	161	612	600	720	741
517	ENSMUSG00000102845.1	0	0	0	0	0	0
518	ENSMUSG00000067653.12	9	6	7	12	13	17
519	ENSMUSG00000109510.1	0	0	0	0	0	0
520	ENSMUSG00000079610.9	128	64	122	146	152	161
521	ENSMUSG00000026121.13	281	98	300	339	375	374
522	ENSMUSG00000087589.3	24	11	28	26	27	29
523	ENSMUSG00000046337.17	1	2	3	10	3	0
524	ENSMUSG00000089906.1	0	0	1	0	0	0
525	ENSMUSG00000077939.1	0	0	0	0	0	0
526	ENSMUSG00000061518.11	1960	700	2213	2070	2697	2344
527	ENSMUSG00000037351.9	7864	2450	7895	8844	9915	10279
528	ENSMUSG00000102416.4	15	4	16	23	20	22
529	ENSMUSG00000104237.1	35	7	51	42	36	37
530	ENSMUSG00000026117.10	23	10	35	20	18	22
531	ENSMUSG00000097291.1	0	0	0	0	2	0
532	ENSMUSG00000026116.11	2302	697	2149	2503	2601	2826
533	ENSMUSG00000103016.1	0	0	1	0	0	0
534	ENSMUSG00000102930.1	0	0	0	0	0	0
535	ENSMUSG00000103159.1	0	0	1	2	1	0
536	ENSMUSG00000080054.3	2	0	0	0	3	0
537	ENSMUSG00000095944.1	0	0	0	0	0	0
538	ENSMUSG00000050122.19	24	9	16	4	14	7
539	ENSMUSG00000103603.1	1	0	0	1	2	2
540	ENSMUSG00000026114.14	0	1	0	3	3	5
541	ENSMUSG00000102231.1	0	0	0	0	0	0
542	ENSMUSG00000026113.17	3305	1184	3501	3429	3833	4295
543	ENSMUSG00000086064.1	0	0	0	0	0	1
544	ENSMUSG00000102879.1	0	0	0	2	0	0
545	ENSMUSG00000026112.7	1869	575	1623	2000	2176	2336
546	ENSMUSG00000026111.15	538	192	533	508	769	581
547	ENSMUSG00000026110.15	881	257	962	1030	1228	1139
548	ENSMUSG00000103948.1	3	0	3	4	0	1
549	ENSMUSG00000087233.1	0	0	0	0	0	2
550	ENSMUSG00000026090.16	6291	2107	4649	6288	6162	7287
551	ENSMUSG00000089767.1	27	4	31	17	39	28
552	ENSMUSG00000104365.1	5	0	4	0	1	0
553	ENSMUSG00000102650.1	3	0	10	0	1	5
554	ENSMUSG00000060771.15	295	101	243	281	373	379
555	ENSMUSG00000097268.1	65	19	54	59	66	65
556	ENSMUSG00000037216.5	87	32	78	74	92	96
557	ENSMUSG00000026088.15	97	30	119	140	154	145
558	ENSMUSG00000026087.11	766	236	635	748	952	859
559	ENSMUSG00000061584.6	1	0	0	0	0	1
560	ENSMUSG00000087374.1	0	0	0	0	0	0
561	ENSMUSG00000026085.11	0	0	0	0	0	0
562	ENSMUSG00000089141.1	0	0	0	0	0	0
563	ENSMUSG00000058407.12	698	253	695	697	946	930
564	ENSMUSG00000026083.12	1843	637	1935	2037	2312	2328
565	ENSMUSG00000026082.11	365	123	465	489	572	520
566	ENSMUSG00000103804.1	11	6	32	27	24	17
567	ENSMUSG00000102716.1	1	0	0	0	0	0
568	ENSMUSG00000037138.18	908	263	1002	927	1041	1068
569	ENSMUSG00000085391.1	5	3	1	6	4	2
570	ENSMUSG00000085280.1	0	0	0	0	0	1
571	ENSMUSG00000087131.7	9	0	1	4	3	0
572	ENSMUSG00000102984.1	0	0	0	0	1	0
573	ENSMUSG00000102541.1	0	0	2	0	0	0
574	ENSMUSG00000103531.1	0	0	0	0	0	0
575	ENSMUSG00000048814.11	3760	1272	3900	3963	4629	4716
576	ENSMUSG00000026080.13	1292	479	1481	1503	1790	1648
577	ENSMUSG00000103647.1	0	0	0	0	1	0
578	ENSMUSG00000102447.1	0	0	0	0	0	0
579	ENSMUSG00000067604.8	1	0	4	1	0	5
580	ENSMUSG00000026078.10	340	125	335	372	471	404
581	ENSMUSG00000103046.1	63	20	38	70	47	68
582	ENSMUSG00000104188.1	0	0	1	0	0	0
583	ENSMUSG00000103182.1	0	0	0	0	0	0
584	ENSMUSG00000098833.1	0	0	0	0	0	0
585	ENSMUSG00000026077.15	965	384	1017	1034	1009	1208
586	ENSMUSG00000092553.1	1	0	0	0	0	2
587	ENSMUSG00000092563.1	1	1	1	2	1	4
588	ENSMUSG00000073702.11	2708	746	2421	2745	3380	3203
589	ENSMUSG00000003134.10	415	135	420	464	472	543
590	ENSMUSG00000102607.1	0	0	4	0	0	0
591	ENSMUSG00000065629.2	0	0	0	0	0	0
592	ENSMUSG00000104827.1	0	0	0	0	0	0
593	ENSMUSG00000003135.15	569	174	601	557	698	755
594	ENSMUSG00000085894.1	31	8	22	35	35	42
595	ENSMUSG00000077704.1	5	2	8	5	1	4
596	ENSMUSG00000048234.13	251	99	310	252	350	421
597	ENSMUSG00000064936.1	1	0	1	0	1	0
598	ENSMUSG00000102471.1	0	0	0	0	1	0
599	ENSMUSG00000050967.5	3748	1113	3346	3793	4010	3944
600	ENSMUSG00000097083.1	92	32	75	97	99	118
601	ENSMUSG00000057173.8	1	2	2	2	1	6
602	ENSMUSG00000091937.3	0	0	0	0	0	0
603	ENSMUSG00000101634.6	0	0	0	0	0	0
604	ENSMUSG00000026074.15	1946	682	2176	1973	2445	2366
605	ENSMUSG00000102985.1	24	3	12	20	30	25
606	ENSMUSG00000026073.13	14	1	8	3	6	14
607	ENSMUSG00000097899.2	27	7	16	17	15	21
608	ENSMUSG00000102975.1	0	0	0	4	0	0
609	ENSMUSG00000026072.12	85	32	81	165	162	165
610	ENSMUSG00000103560.1	0	0	0	1	2	0
611	ENSMUSG00000070942.8	20	9	18	27	37	27
612	ENSMUSG00000103230.1	0	0	1	1	1	3
613	ENSMUSG00000026069.15	1	1	5	3	3	7
614	ENSMUSG00000026070.15	0	0	0	0	0	2
615	ENSMUSG00000026068.11	1	1	0	5	6	2
616	ENSMUSG00000104441.1	0	0	0	0	0	0
617	ENSMUSG00000026065.8	5	1	6	9	8	4
618	ENSMUSG00000102676.1	0	0	0	0	0	0
619	ENSMUSG00000026062.12	167	21	58	133	99	113
620	ENSMUSG00000103679.1	3	0	0	1	0	0
621	ENSMUSG00000103270.1	2	0	4	5	2	2
622	ENSMUSG00000041945.12	32	0	31	30	27	36
623	ENSMUSG00000079588.3	8	0	0	2	1	1
624	ENSMUSG00000094136.2	0	0	0	0	0	0
625	ENSMUSG00000104072.1	0	0	0	0	3	0
626	ENSMUSG00000100185.1	0	0	0	0	0	0
627	ENSMUSG00000100832.1	3	0	6	2	6	4
628	ENSMUSG00000100178.1	0	0	0	0	0	0
629	ENSMUSG00000101877.1	0	0	0	0	0	0
630	ENSMUSG00000053640.2	0	2	1	0	1	1
631	ENSMUSG00000101919.1	0	0	0	0	0	0
632	ENSMUSG00000101299.2	89	24	110	148	210	98
633	ENSMUSG00000100180.1	0	0	0	0	0	3
634	ENSMUSG00000103106.1	0	0	2	4	13	0
635	ENSMUSG00000060424.14	771	217	581	885	1075	774
636	ENSMUSG00000104199.1	1	1	3	1	7	5
637	ENSMUSG00000045515.4	1757	662	1858	2342	2310	2309
638	ENSMUSG00000093436.6	81	19	61	92	113	104
639	ENSMUSG00000097063.3	70	20	53	52	75	69
640	ENSMUSG00000099784.1	107	37	100	127	166	152
641	ENSMUSG00000060679.14	505	160	606	672	683	736
642	ENSMUSG00000077448.1	0	1	1	0	0	0
643	ENSMUSG00000041907.9	185	67	202	161	161	184
644	ENSMUSG00000089088.1	0	0	0	0	0	0
645	ENSMUSG00000070939.9	1612	477	1488	1685	1763	1883
646	ENSMUSG00000100269.1	0	0	2	3	0	0
647	ENSMUSG00000041878.3	17	3	4	10	12	18
648	ENSMUSG00000010290.7	575	210	659	539	757	739
649	ENSMUSG00000008136.14	1012	309	760	892	945	982
650	ENSMUSG00000094497.1	2	0	8	0	0	4
651	ENSMUSG00000099576.1	1	0	0	0	0	0
652	ENSMUSG00000099694.1	0	0	0	0	0	0
653	ENSMUSG00000101923.1	0	0	0	0	0	0
654	ENSMUSG00000066877.11	587	183	660	561	626	664
655	ENSMUSG00000103422.1	0	0	1	0	0	1
656	ENSMUSG00000103945.1	4	2	28	12	15	14
657	ENSMUSG00000026051.8	46	0	7	13	16	18
658	ENSMUSG00000100764.1	1	3	7	7	12	12
659	ENSMUSG00000100635.1	0	2	1	1	4	4
660	ENSMUSG00000100480.1	24	10	14	18	41	36
661	ENSMUSG00000057363.12	1206	336	942	1134	1585	1319
662	ENSMUSG00000090243.1	0	1	0	0	0	0
663	ENSMUSG00000100701.1	9	1	11	3	23	1
664	ENSMUSG00000101395.1	0	0	0	0	0	0
665	ENSMUSG00000088848.1	0	0	0	0	0	0
666	ENSMUSG00000095757.1	0	0	0	0	0	0
667	ENSMUSG00000041763.14	1271	357	1230	1210	1454	1540
668	ENSMUSG00000047343.4	4	0	1	2	3	2
669	ENSMUSG00000090106.1	0	0	0	0	0	0
670	ENSMUSG00000091844.2	0	0	0	0	2	1
671	ENSMUSG00000026049.11	26	8	39	34	45	40
672	ENSMUSG00000101104.6	0	0	0	0	0	0
673	ENSMUSG00000026047.13	116	28	85	154	167	147
674	ENSMUSG00000041684.11	423	160	481	446	633	505
675	ENSMUSG00000026048.16	451	145	522	605	657	681
676	ENSMUSG00000046828.3	0	0	0	1	5	1
677	ENSMUSG00000089703.1	2	2	8	1	2	2
678	ENSMUSG00000100966.1	0	0	0	0	0	0
679	ENSMUSG00000100769.1	0	0	0	0	0	0
680	ENSMUSG00000101567.1	8	1	1	4	6	5
681	ENSMUSG00000056870.9	85	16	31	71	104	71
682	ENSMUSG00000102319.1	0	0	0	0	0	0
683	ENSMUSG00000089877.1	0	0	0	0	0	0
684	ENSMUSG00000101701.1	0	0	0	0	0	0
685	ENSMUSG00000103071.1	1	0	0	0	0	0
686	ENSMUSG00000100434.1	0	0	0	0	0	0
687	ENSMUSG00000100013.1	0	0	0	0	0	0
688	ENSMUSG00000101251.1	0	0	0	0	0	0
689	ENSMUSG00000101937.1	0	0	0	0	0	0
690	ENSMUSG00000026043.18	175	23	10	164	47	95
691	ENSMUSG00000105211.1	0	0	0	0	0	0
692	ENSMUSG00000026042.16	135	17	29	96	102	107
693	ENSMUSG00000104476.1	0	0	0	0	0	0
694	ENSMUSG00000100218.1	0	0	0	0	0	0
695	ENSMUSG00000100361.1	0	0	0	0	0	0
696	ENSMUSG00000100894.1	0	0	0	0	0	0
697	ENSMUSG00000095121.1	0	0	0	0	0	0
698	ENSMUSG00000065255.1	0	0	0	0	0	0
699	ENSMUSG00000100843.1	0	0	0	0	0	0
700	ENSMUSG00000087764.1	0	0	0	0	0	0
701	ENSMUSG00000025995.16	517	195	521	531	725	617
702	ENSMUSG00000099850.1	0	0	0	0	0	0
703	ENSMUSG00000084817.3	24	11	31	24	34	25
704	ENSMUSG00000098549.1	0	0	0	1	0	0
705	ENSMUSG00000099381.1	0	0	0	3	0	1
706	ENSMUSG00000025993.10	179	78	162	189	242	217
707	ENSMUSG00000099946.1	0	0	0	0	0	0
708	ENSMUSG00000070896.2	0	0	0	0	0	0
709	ENSMUSG00000090682.4	0	0	0	0	0	0
710	ENSMUSG00000044457.8	0	0	0	0	0	0
711	ENSMUSG00000099432.1	0	0	0	0	0	0
712	ENSMUSG00000041144.12	49	18	64	90	79	93
713	ENSMUSG00000096047.1	0	0	0	0	0	0
714	ENSMUSG00000101262.1	0	0	0	0	0	0
715	ENSMUSG00000101337.6	155	82	119	168	207	235
716	ENSMUSG00000025986.6	6010	1997	5160	5959	7375	7113
717	ENSMUSG00000100213.1	73	26	74	101	74	78
718	ENSMUSG00000103129.1	0	0	0	0	2	0
719	ENSMUSG00000100160.1	0	5	1	0	0	2
720	ENSMUSG00000101921.1	0	0	0	0	0	0
721	ENSMUSG00000101447.1	1	0	0	0	0	0
722	ENSMUSG00000081185.1	3	0	1	5	7	12
723	ENSMUSG00000103246.1	0	0	0	0	0	0
724	ENSMUSG00000098876.1	0	0	0	0	0	0
725	ENSMUSG00000100530.1	0	0	0	0	0	0
726	ENSMUSG00000104067.1	0	0	0	0	0	0
727	ENSMUSG00000100033.1	0	0	1	1	3	1
728	ENSMUSG00000094968.1	0	0	0	0	0	0
729	ENSMUSG00000088017.1	0	0	0	0	0	0
730	ENSMUSG00000101996.1	0	0	0	0	0	0
731	ENSMUSG00000096973.1	0	0	0	0	0	0
732	ENSMUSG00000064943.1	0	0	0	0	0	0
733	ENSMUSG00000100866.1	0	0	0	0	0	0
734	ENSMUSG00000101721.1	0	0	0	0	0	0
735	ENSMUSG00000099376.1	0	0	0	0	0	0
736	ENSMUSG00000097883.1	0	0	0	0	0	0
737	ENSMUSG00000092790.1	0	0	0	0	0	0
738	ENSMUSG00000099698.1	0	0	0	0	0	0
739	ENSMUSG00000099454.1	0	0	0	0	0	0
740	ENSMUSG00000051616.14	0	0	0	0	0	0
741	ENSMUSG00000099627.1	0	0	0	0	0	0
742	ENSMUSG00000099577.1	0	0	0	0	0	0
743	ENSMUSG00000099882.1	0	0	0	0	0	0
744	ENSMUSG00000101760.1	0	0	0	0	0	0
745	ENSMUSG00000099608.1	0	0	0	0	0	0
746	ENSMUSG00000099864.1	0	0	0	0	0	0
747	ENSMUSG00000098249.1	0	0	0	0	0	0
748	ENSMUSG00000100451.1	0	0	0	0	0	0
749	ENSMUSG00000099941.1	0	0	0	0	0	0
750	ENSMUSG00000084531.1	0	0	0	0	0	0
751	ENSMUSG00000100816.1	0	0	2	0	0	0
752	ENSMUSG00000026109.14	675	232	900	665	826	1019
753	ENSMUSG00000100671.1	0	0	10	4	1	1
754	ENSMUSG00000092906.1	0	0	1	0	0	4
755	ENSMUSG00000101242.1	0	0	0	2	5	0
756	ENSMUSG00000099924.1	2	0	2	7	8	6
757	ENSMUSG00000099625.1	7	1	7	11	2	8
758	ENSMUSG00000101799.1	13	4	7	16	21	26
759	ENSMUSG00000045954.7	243	52	130	256	219	247
760	ENSMUSG00000099741.1	0	0	0	1	0	0
761	ENSMUSG00000101702.1	0	0	0	0	0	0
762	ENSMUSG00000026107.11	135	35	148	177	231	225
763	ENSMUSG00000099413.1	1	0	2	10	2	3
764	ENSMUSG00000103424.1	0	0	0	0	0	0
765	ENSMUSG00000101741.1	3	0	1	3	3	3
766	ENSMUSG00000018417.14	1057	360	994	1541	1828	1617
767	ENSMUSG00000101724.1	0	0	0	2	2	1
768	ENSMUSG00000100313.1	0	0	0	0	0	0
769	ENSMUSG00000100696.1	3	1	1	1	0	1
770	ENSMUSG00000099135.1	0	0	0	0	0	0
771	ENSMUSG00000072324.4	4	0	2	8	3	0
772	ENSMUSG00000062939.11	5	8	23	22	38	32
773	ENSMUSG00000101628.1	0	0	0	0	0	2
774	ENSMUSG00000078291.1	0	0	0	0	0	0
775	ENSMUSG00000109599.1	16	2	6	10	13	7
776	ENSMUSG00000026104.14	172	41	160	204	194	240
777	ENSMUSG00000099569.1	2	0	0	0	0	0
778	ENSMUSG00000026103.14	6862	2578	7697	7444	9327	8904
779	ENSMUSG00000099648.1	0	0	0	0	0	0
780	ENSMUSG00000065192.1	0	0	0	0	0	0
781	ENSMUSG00000002881.14	453	153	473	458	644	642
782	ENSMUSG00000097833.1	0	2	2	0	0	10
783	ENSMUSG00000101501.1	2	0	1	1	5	4
784	ENSMUSG00000100120.1	1	1	7	5	3	2
785	ENSMUSG00000099878.1	0	0	1	0	0	0
786	ENSMUSG00000100007.1	7	10	16	29	31	16
787	ENSMUSG00000043015.15	178	60	218	173	283	288
788	ENSMUSG00000103630.1	6	3	23	4	9	12
789	ENSMUSG00000041439.15	1935	725	2650	2153	2749	2591
790	ENSMUSG00000100302.1	0	0	0	0	0	0
791	ENSMUSG00000100230.1	1	0	2	0	0	1
792	ENSMUSG00000026102.9	598	209	693	711	911	866
793	ENSMUSG00000041426.12	262	86	234	285	332	289
794	ENSMUSG00000089802.1	0	0	1	0	0	0
795	ENSMUSG00000043629.12	136	63	251	150	248	305
796	ENSMUSG00000026100.6	2	1	3	5	0	8
797	ENSMUSG00000089334.1	0	0	0	0	0	0
798	ENSMUSG00000060715.9	3	1	5	1	7	4
799	ENSMUSG00000026098.13	58	16	64	89	80	88
800	ENSMUSG00000100763.1	0	1	3	0	8	1
801	ENSMUSG00000026097.9	98	42	93	118	144	143
802	ENSMUSG00000100679.1	0	0	0	0	0	0
803	ENSMUSG00000026096.14	213	80	274	268	360	315
804	ENSMUSG00000099913.1	10	2	2	2	8	2
805	ENSMUSG00000101838.6	2	0	2	4	3	5
806	ENSMUSG00000026095.15	36	4	52	39	49	53
807	ENSMUSG00000117809.1	0	0	0	0	0	0
808	ENSMUSG00000100267.1	0	0	0	0	0	0
809	ENSMUSG00000099450.1	0	0	0	0	0	0
810	ENSMUSG00000100069.1	0	0	0	0	0	0
811	ENSMUSG00000096141.2	35	10	26	28	22	57
812	ENSMUSG00000092657.1	0	0	0	0	0	0
813	ENSMUSG00000026094.14	198	57	115	148	231	236
814	ENSMUSG00000102405.1	0	0	0	0	0	1
815	ENSMUSG00000042807.15	1797	607	1776	1985	2234	2403
816	ENSMUSG00000098443.1	0	0	0	2	0	0
817	ENSMUSG00000087949.1	0	0	0	0	0	0
818	ENSMUSG00000102868.1	1	1	7	0	1	1
819	ENSMUSG00000094013.1	0	0	0	0	0	0
820	ENSMUSG00000025983.11	0	2	7	3	5	8
821	ENSMUSG00000041303.7	676	235	814	810	1068	971
822	ENSMUSG00000109809.1	1	1	0	4	0	0
823	ENSMUSG00000073678.4	585	204	607	596	656	749
824	ENSMUSG00000104136.1	0	1	3	8	7	4
825	ENSMUSG00000101130.1	0	0	0	0	0	0
826	ENSMUSG00000052331.14	269	64	288	275	354	348
827	ENSMUSG00000101674.6	3	0	0	0	2	0
828	ENSMUSG00000102503.1	0	3	2	0	1	0
829	ENSMUSG00000089245.1	0	0	0	0	0	0
830	ENSMUSG00000102642.1	0	0	0	0	0	0
831	ENSMUSG00000025982.13	5984	1942	6574	6395	7686	7770
832	ENSMUSG00000103030.1	0	0	5	1	0	4
833	ENSMUSG00000025981.13	377	129	336	391	464	537
834	ENSMUSG00000101122.1	14	5	23	28	31	56
835	ENSMUSG00000025980.14	2342	716	2252	2258	2625	2908
836	ENSMUSG00000073676.4	496	181	510	485	663	642
837	ENSMUSG00000100736.1	2	0	0	0	0	1
838	ENSMUSG00000089670.1	26	0	29	39	31	26
839	ENSMUSG00000025979.13	1041	304	966	900	1188	1200
840	ENSMUSG00000061863.6	6	1	3	1	0	3
841	ENSMUSG00000025978.14	494	138	335	516	587	513
842	ENSMUSG00000097649.2	49	20	59	65	84	86
843	ENSMUSG00000046994.9	518	168	556	568	654	674
844	ENSMUSG00000025977.15	0	2	0	0	1	1
845	ENSMUSG00000100215.1	63	26	55	74	80	93
846	ENSMUSG00000101945.1	0	0	0	0	0	0
847	ENSMUSG00000101085.1	0	0	0	0	0	0
848	ENSMUSG00000038349.10	444	222	609	621	621	731
849	ENSMUSG00000102145.1	1	0	15	1	3	3
850	ENSMUSG00000100309.1	0	0	0	0	0	0
851	ENSMUSG00000102831.1	0	0	4	0	0	0
852	ENSMUSG00000099950.1	14	6	10	19	30	5
853	ENSMUSG00000102491.1	0	0	0	0	2	0
854	ENSMUSG00000100372.1	0	0	0	0	0	0
855	ENSMUSG00000100944.1	0	0	0	0	0	0
856	ENSMUSG00000101332.1	0	0	0	0	0	0
857	ENSMUSG00000045336.5	0	0	0	0	0	0
858	ENSMUSG00000038331.15	1968	689	2271	2040	2373	2191
859	ENSMUSG00000087022.4	462	164	467	491	533	617
860	ENSMUSG00000104310.1	21	3	16	19	30	35
861	ENSMUSG00000094128.1	0	0	0	0	0	0
862	ENSMUSG00000099945.1	0	0	0	0	0	0
863	ENSMUSG00000101429.1	2	1	6	4	21	11
864	ENSMUSG00000101129.1	0	0	3	0	0	0
865	ENSMUSG00000097519.2	0	0	3	3	0	2
866	ENSMUSG00000038323.3	531	180	481	560	654	620
867	ENSMUSG00000048495.16	185	50	180	209	261	272
868	ENSMUSG00000025971.6	279	99	311	290	363	384
869	ENSMUSG00000077776.1	0	0	0	0	0	0
870	ENSMUSG00000088353.1	0	0	0	0	0	0
871	ENSMUSG00000101826.1	0	0	0	0	0	0
872	ENSMUSG00000102685.1	0	0	0	0	0	0
873	ENSMUSG00000101151.1	0	0	0	0	0	0
874	ENSMUSG00000038305.15	845	240	400	782	900	940
875	ENSMUSG00000091283.1	0	0	0	0	0	1
876	ENSMUSG00000054770.16	278	96	356	308	357	391
877	ENSMUSG00000026039.9	6	9	10	3	13	15
878	ENSMUSG00000063558.4	245	82	137	237	284	329
879	ENSMUSG00000064294.12	133	12	13	111	126	139
880	ENSMUSG00000089275.1	0	0	0	0	0	0
881	ENSMUSG00000038242.12	24	5	23	20	34	26
882	ENSMUSG00000089822.1	1	0	0	1	0	1
883	ENSMUSG00000079554.2	0	0	0	0	0	3
884	ENSMUSG00000103839.1	67	33	77	117	97	99
885	ENSMUSG00000051223.14	3885	1257	3978	3986	5191	4855
886	ENSMUSG00000026034.17	1858	464	1701	2175	2326	2589
887	ENSMUSG00000026035.15	157	76	189	224	267	234
888	ENSMUSG00000026036.17	352	102	349	398	518	472
889	ENSMUSG00000026037.14	418	175	421	462	647	616
890	ENSMUSG00000094245.1	9	0	1	4	6	2
891	ENSMUSG00000085054.2	13	12	21	17	27	17
892	ENSMUSG00000038174.14	2052	722	2388	2273	2982	2663
893	ENSMUSG00000026032.8	760	242	783	732	903	1005
894	ENSMUSG00000100202.1	0	0	0	0	0	0
895	ENSMUSG00000099490.1	0	0	0	0	0	0
896	ENSMUSG00000059647.5	5	2	4	3	3	5
897	ENSMUSG00000047528.13	3	1	3	9	3	0
898	ENSMUSG00000102059.1	27	10	16	14	14	19
899	ENSMUSG00000101046.1	0	0	0	0	0	0
900	ENSMUSG00000026031.15	299	81	224	276	353	364
901	ENSMUSG00000100236.1	0	0	0	0	0	0
902	ENSMUSG00000026029.14	57	16	28	56	91	53
903	ENSMUSG00000102719.1	0	0	0	0	0	0
904	ENSMUSG00000099719.1	0	0	3	0	0	3
905	ENSMUSG00000026028.12	3552	1300	4229	4572	5349	4751
906	ENSMUSG00000026027.13	747	269	750	927	974	924
907	ENSMUSG00000072295.7	0	0	0	0	0	0
908	ENSMUSG00000047383.8	0	0	0	0	0	0
909	ENSMUSG00000099752.1	0	0	0	0	0	0
910	ENSMUSG00000077616.1	0	0	0	0	0	0
911	ENSMUSG00000038079.14	385	107	410	398	481	455
912	ENSMUSG00000097573.2	5	1	6	14	8	10
913	ENSMUSG00000079550.9	10	2	10	15	24	28
914	ENSMUSG00000101586.1	7	3	13	12	16	11
915	ENSMUSG00000099563.1	0	1	3	1	0	0
916	ENSMUSG00000026024.14	778	245	905	876	1074	1086
917	ENSMUSG00000026023.16	7	3	25	28	30	28
918	ENSMUSG00000099922.1	0	0	0	0	0	0
919	ENSMUSG00000104502.1	0	0	0	0	0	0
920	ENSMUSG00000041075.8	195	36	70	142	147	146
921	ENSMUSG00000097819.1	0	2	1	2	7	0
922	ENSMUSG00000047361.16	119	26	99	140	173	167
923	ENSMUSG00000099811.6	0	0	0	0	0	0
924	ENSMUSG00000101409.1	0	0	0	0	0	0
925	ENSMUSG00000026021.15	1035	394	1016	963	1465	1267
926	ENSMUSG00000089276.1	1	0	0	0	0	0
927	ENSMUSG00000103821.1	8	5	13	7	20	17
928	ENSMUSG00000101400.1	0	0	0	2	1	6
929	ENSMUSG00000026020.9	727	237	837	800	1003	992
930	ENSMUSG00000077345.1	0	0	2	0	0	1
931	ENSMUSG00000077358.1	0	0	0	0	0	0
932	ENSMUSG00000089512.3	0	0	3	0	0	0
933	ENSMUSG00000089093.3	0	0	0	0	0	0
934	ENSMUSG00000067336.6	3674	1289	4230	4035	5148	4432
935	ENSMUSG00000104052.1	1	0	3	0	0	4
936	ENSMUSG00000103131.1	0	0	0	0	0	0
937	ENSMUSG00000041040.12	1041	369	1169	1148	1354	1391
938	ENSMUSG00000103696.1	0	0	0	0	3	0
939	ENSMUSG00000100901.1	0	0	1	0	0	0
940	ENSMUSG00000026018.12	863	253	725	774	903	1015
941	ENSMUSG00000026019.15	631	212	671	747	924	875
942	ENSMUSG00000026017.13	391	114	413	426	451	502
943	ENSMUSG00000082609.1	0	1	0	4	1	0
944	ENSMUSG00000073664.11	491	200	726	674	957	817
945	ENSMUSG00000100516.1	0	0	0	0	0	0
946	ENSMUSG00000049439.13	163	53	162	187	172	188
947	ENSMUSG00000103822.1	0	0	0	0	3	1
948	ENSMUSG00000026782.15	4398	1422	4552	4246	5035	5187
949	ENSMUSG00000026014.15	1782	636	2050	1974	2320	1966
950	ENSMUSG00000081562.1	1	4	5	0	1	2
951	ENSMUSG00000084400.1	0	0	0	0	0	0
952	ENSMUSG00000082160.1	63	12	51	10	9	17
953	ENSMUSG00000103215.1	0	0	0	0	0	0
954	ENSMUSG00000088973.1	0	0	0	0	0	0
955	ENSMUSG00000084151.1	0	0	0	0	0	0
956	ENSMUSG00000101188.1	475	169	511	451	578	542
957	ENSMUSG00000026012.2	6	1	3	0	6	2
958	ENSMUSG00000086795.1	0	0	0	0	0	1
959	ENSMUSG00000085965.1	0	0	0	0	0	0
960	ENSMUSG00000104069.1	0	0	0	0	0	0
961	ENSMUSG00000083118.1	0	0	0	0	0	0
962	ENSMUSG00000083355.1	0	0	2	1	3	0
963	ENSMUSG00000102549.1	13	5	4	9	9	7
964	ENSMUSG00000026011.13	3	1	7	3	2	2
965	ENSMUSG00000081382.1	18	3	13	18	34	12
966	ENSMUSG00000080800.1	0	0	0	0	0	0
967	ENSMUSG00000026009.14	2	0	5	6	8	1
968	ENSMUSG00000102561.1	1	0	0	1	0	0
969	ENSMUSG00000082804.3	2	0	0	0	0	2
970	ENSMUSG00000082661.1	0	0	0	0	0	0
971	ENSMUSG00000080785.1	0	0	0	0	0	0
972	ENSMUSG00000100893.1	0	0	0	0	0	0
973	ENSMUSG00000085248.2	0	0	0	0	0	0
974	ENSMUSG00000085447.1	0	0	0	0	0	0
975	ENSMUSG00000086408.1	0	0	0	0	0	0
976	ENSMUSG00000089546.1	0	0	0	0	0	0
977	ENSMUSG00000100965.1	0	0	0	0	0	0
978	ENSMUSG00000102168.1	0	0	0	0	0	0
979	ENSMUSG00000100381.1	0	0	0	0	0	0
980	ENSMUSG00000086009.1	0	0	0	0	0	0
981	ENSMUSG00000052062.14	68	23	56	72	67	90
982	ENSMUSG00000103656.1	0	0	0	0	0	0
983	ENSMUSG00000104402.1	0	0	0	0	0	0
984	ENSMUSG00000104081.1	0	0	2	0	0	1
985	ENSMUSG00000085842.7	0	0	0	0	0	0
986	ENSMUSG00000103002.1	0	0	0	0	0	0
987	ENSMUSG00000100344.1	0	0	0	0	0	0
988	ENSMUSG00000101509.1	0	0	0	0	0	0
989	ENSMUSG00000085019.2	0	0	0	0	0	0
990	ENSMUSG00000102359.1	0	0	0	0	0	0
991	ENSMUSG00000085400.1	0	0	0	0	0	0
992	ENSMUSG00000100750.1	9	4	8	6	19	14
993	ENSMUSG00000081950.1	0	0	0	0	0	0
994	ENSMUSG00000084333.1	0	0	0	0	5	3
995	ENSMUSG00000025969.15	583	159	194	539	489	535
996	ENSMUSG00000100811.1	1	0	0	5	2	3
997	ENSMUSG00000103032.1	9	2	9	12	5	12
998	ENSMUSG00000100426.1	0	0	0	0	2	0
999	ENSMUSG00000040865.15	802	303	989	1142	1286	1230
1000	ENSMUSG00000104991.1	0	0	0	0	0	0
1001	ENSMUSG00000088953.1	0	0	0	0	0	0
1002	ENSMUSG00000081617.1	0	0	0	0	0	0
1003	ENSMUSG00000081429.1	0	0	2	0	1	0
1004	ENSMUSG00000084799.7	63	15	84	71	75	94
1005	ENSMUSG00000101599.1	88	31	121	102	132	134
1006	ENSMUSG00000025968.16	2376	736	2733	2574	3195	3034
1007	ENSMUSG00000077884.2	0	0	0	4	0	1
1008	ENSMUSG00000025967.16	1807	621	1780	1873	2239	2283
1009	ENSMUSG00000098850.1	0	0	0	0	0	0
1010	ENSMUSG00000064612.2	0	0	0	1	0	0
1011	ENSMUSG00000105060.1	0	0	0	0	0	0
1012	ENSMUSG00000064602.1	6	0	2	1	1	4
1013	ENSMUSG00000046856.13	16	11	15	18	40	32
1014	ENSMUSG00000094290.2	0	0	0	0	0	0
1015	ENSMUSG00000086730.2	0	0	0	0	0	1
1016	ENSMUSG00000102536.1	0	0	0	0	0	0
1017	ENSMUSG00000087561.7	0	0	0	0	0	0
1018	ENSMUSG00000092705.1	0	0	0	0	0	0
1019	ENSMUSG00000027520.16	247	116	440	362	361	497
1020	ENSMUSG00000094214.1	0	0	0	0	0	1
1021	ENSMUSG00000083039.1	0	0	0	0	0	0
1022	ENSMUSG00000081643.1	5	5	10	7	15	12
1023	ENSMUSG00000025964.15	4456	1507	5260	5867	7405	6411
1024	ENSMUSG00000087823.1	9	1	3	10	11	19
1025	ENSMUSG00000115378.1	5	0	8	12	7	3
1026	ENSMUSG00000069085.5	0	0	2	3	1	0
1027	ENSMUSG00000083066.1	0	0	0	0	0	0
1028	ENSMUSG00000025963.5	31	6	23	17	29	40
1029	ENSMUSG00000025962.15	274	111	391	323	471	415
1030	ENSMUSG00000025961.1	23	7	22	22	36	30
1031	ENSMUSG00000080817.1	0	0	0	0	2	3
1032	ENSMUSG00000082373.2	4	0	11	8	11	4
1033	ENSMUSG00000044689.5	11	11	9	6	7	9
1034	ENSMUSG00000025959.13	1135	400	1313	1116	1369	1484
1035	ENSMUSG00000098487.1	0	0	0	0	0	0
1036	ENSMUSG00000086836.1	2	4	5	0	0	3
1037	ENSMUSG00000086721.2	1	0	0	0	1	0
1038	ENSMUSG00000101895.1	1	0	1	0	0	0
1039	ENSMUSG00000093228.1	0	0	0	0	0	0
1040	ENSMUSG00000099658.1	0	0	0	0	0	0
1041	ENSMUSG00000025958.14	1081	396	1214	1211	1477	1380
1042	ENSMUSG00000025956.10	168	45	151	161	207	223
1043	ENSMUSG00000101832.1	2	1	0	2	0	0
1044	ENSMUSG00000100437.1	0	0	3	0	0	0
1045	ENSMUSG00000087213.2	4	3	2	8	0	8
1046	ENSMUSG00000070871.10	228	76	287	283	363	321
1047	ENSMUSG00000045005.9	44	8	39	47	38	35
1048	ENSMUSG00000102140.1	3	0	0	1	3	2
1049	ENSMUSG00000051344.13	1172	437	1541	1411	1585	1618
1050	ENSMUSG00000097264.1	0	0	0	0	0	0
1051	ENSMUSG00000084416.3	77	44	67	94	93	70
1052	ENSMUSG00000077471.1	0	0	0	0	0	0
1053	ENSMUSG00000025955.13	0	0	0	0	0	0
1054	ENSMUSG00000090042.1	0	0	0	0	0	0
1055	ENSMUSG00000070870.6	0	0	0	0	0	0
1056	ENSMUSG00000067299.11	0	0	0	0	0	0
1057	ENSMUSG00000025952.15	0	0	0	0	0	0
1058	ENSMUSG00000073658.4	0	0	0	0	0	0
1059	ENSMUSG00000100774.1	2	0	3	1	1	0
1060	ENSMUSG00000044429.8	1	0	0	0	0	0
1061	ENSMUSG00000100846.1	0	0	0	0	0	0
1062	ENSMUSG00000044816.10	12	5	23	14	19	43
1063	ENSMUSG00000025950.16	590	181	525	574	673	675
1064	ENSMUSG00000025949.16	1278	429	1435	1315	1783	1547
1065	ENSMUSG00000025946.13	23	7	32	57	60	42
1066	ENSMUSG00000100503.1	0	0	0	0	0	0
1067	ENSMUSG00000100504.1	0	0	0	0	0	0
1068	ENSMUSG00000099383.1	0	0	0	0	0	0
1069	ENSMUSG00000100340.1	0	0	0	0	0	0
1070	ENSMUSG00000100439.1	0	0	0	0	0	0
1071	ENSMUSG00000099819.1	0	0	0	0	0	0
1072	ENSMUSG00000082565.1	0	0	0	0	0	0
1073	ENSMUSG00000082774.1	0	0	0	0	0	0
1074	ENSMUSG00000025945.11	0	0	0	0	0	0
1075	ENSMUSG00000081623.1	0	0	0	0	0	0
1076	ENSMUSG00000083242.1	0	0	0	0	0	0
1077	ENSMUSG00000083289.1	0	0	0	0	0	0
1078	ENSMUSG00000015222.18	24407	8459	25111	26665	29835	29767
1079	ENSMUSG00000088850.1	0	0	0	0	0	0
1080	ENSMUSG00000073656.4	0	0	1	1	5	0
1081	ENSMUSG00000065694.1	2	1	5	0	3	0
1082	ENSMUSG00000055567.18	8241	2869	11455	10106	12822	11390
1083	ENSMUSG00000103375.1	51	14	74	77	71	79
1084	ENSMUSG00000026005.15	250	114	297	333	377	355
1085	ENSMUSG00000026004.15	202	71	243	258	324	273
1086	ENSMUSG00000102559.1	21	8	55	48	58	51
1087	ENSMUSG00000102374.1	5	5	38	45	41	39
1088	ENSMUSG00000102776.1	16	15	25	23	31	34
1089	ENSMUSG00000082057.1	2	1	27	17	6	14
1090	ENSMUSG00000103706.1	6	0	14	13	20	15
1091	ENSMUSG00000103756.1	4	3	22	13	13	13
1092	ENSMUSG00000103382.1	27	6	40	19	30	26
1093	ENSMUSG00000103553.1	1	0	5	0	0	1
1094	ENSMUSG00000026003.5	509	135	469	706	666	675
1095	ENSMUSG00000082769.3	30	12	18	33	37	15
1096	ENSMUSG00000089420.2	0	0	0	0	0	0
1097	ENSMUSG00000077328.1	0	0	0	0	0	0
1098	ENSMUSG00000061816.15	6	7	21	19	21	21
1099	ENSMUSG00000094191.1	2	1	4	1	7	2
1100	ENSMUSG00000082212.1	0	0	4	0	12	0
1101	ENSMUSG00000026000.16	3658	1250	4401	4056	5423	4902
1102	ENSMUSG00000025991.8	7	1	11	11	21	15
1103	ENSMUSG00000086204.1	0	0	0	0	0	0
1104	ENSMUSG00000077745.1	0	0	0	0	0	0
1105	ENSMUSG00000082473.1	0	0	0	0	0	0
1106	ENSMUSG00000095282.1	0	0	0	0	0	0
1107	ENSMUSG00000085075.1	0	0	0	0	0	0
1108	ENSMUSG00000104395.1	0	0	0	0	0	0
1109	ENSMUSG00000096031.1	0	0	0	0	0	0
1110	ENSMUSG00000087329.3	0	0	0	0	0	0
1111	ENSMUSG00000062209.15	1612	579	2193	1814	2688	2430
1112	ENSMUSG00000102449.1	0	0	0	0	0	0
1113	ENSMUSG00000083795.1	0	0	0	0	0	0
1114	ENSMUSG00000080539.1	0	0	0	0	0	0
1115	ENSMUSG00000103307.1	0	0	0	0	0	0
1116	ENSMUSG00000104508.1	0	0	0	0	1	0
1117	ENSMUSG00000103642.1	0	0	0	0	0	0
1118	ENSMUSG00000103809.1	0	0	0	0	0	2
1119	ENSMUSG00000087514.1	0	0	3	0	0	0
1120	ENSMUSG00000084332.1	0	0	0	0	0	0
1121	ENSMUSG00000101387.1	0	0	0	0	0	0
1122	ENSMUSG00000099804.1	0	0	0	0	0	0
1123	ENSMUSG00000100354.1	0	0	3	0	0	0
1124	ENSMUSG00000101156.1	0	0	0	0	0	0
1125	ENSMUSG00000025997.13	37	22	30	60	69	69
1126	ENSMUSG00000100815.1	0	0	0	0	0	0
1127	ENSMUSG00000099954.1	0	0	0	0	0	0
1128	ENSMUSG00000103402.1	0	0	0	0	0	0
1129	ENSMUSG00000053153.14	7	0	1	3	0	2
1130	ENSMUSG00000089345.1	0	0	0	0	0	0
1131	ENSMUSG00000080524.1	0	0	0	0	0	0
1132	ENSMUSG00000101730.1	0	0	0	0	0	0
1133	ENSMUSG00000103052.1	0	0	0	0	0	0
1134	ENSMUSG00000104287.1	0	0	0	0	0	0
1135	ENSMUSG00000075952.1	0	0	0	0	0	0
1136	ENSMUSG00000045648.15	90	26	206	114	159	148
1137	ENSMUSG00000026196.7	9	1	3	10	10	8
1138	ENSMUSG00000089965.1	0	0	0	0	0	0
1139	ENSMUSG00000101551.1	0	0	0	0	0	0
1140	ENSMUSG00000050296.14	6	0	3	2	1	4
1141	ENSMUSG00000101617.1	0	0	0	0	0	0
1142	ENSMUSG00000026192.13	527	170	465	650	682	732
1143	ENSMUSG00000026193.15	3226	576	704	2242	1695	1804
1144	ENSMUSG00000073652.10	0	0	2	2	0	0
1145	ENSMUSG00000101834.1	5	0	8	2	9	2
1146	ENSMUSG00000100319.1	0	0	0	0	0	0
1147	ENSMUSG00000102689.1	0	0	0	0	0	0
1148	ENSMUSG00000099707.6	0	0	0	0	1	0
1149	ENSMUSG00000101211.1	0	0	0	0	0	0
1150	ENSMUSG00000101848.1	0	0	0	0	0	0
1151	ENSMUSG00000101764.1	0	0	0	0	0	0
1152	ENSMUSG00000059483.5	0	0	0	0	0	0
1153	ENSMUSG00000101496.1	3	0	1	2	1	0
1154	ENSMUSG00000102123.1	1	0	0	0	0	0
1155	ENSMUSG00000039395.8	93	23	117	123	171	173
1156	ENSMUSG00000094655.1	2	1	0	0	0	0
1157	ENSMUSG00000094050.1	0	0	0	0	0	1
1158	ENSMUSG00000093956.1	6	0	0	0	1	5
1159	ENSMUSG00000093843.1	6	0	2	0	5	0
1160	ENSMUSG00000026189.13	54	26	66	76	115	99
1161	ENSMUSG00000026188.11	316	121	343	345	376	427
1162	ENSMUSG00000026187.9	366	85	369	453	519	504
1163	ENSMUSG00000039372.5	559	135	274	389	467	444
1164	ENSMUSG00000085812.1	0	0	0	0	0	0
1165	ENSMUSG00000039354.16	1149	353	944	1060	1223	1343
1166	ENSMUSG00000110712.1	3	0	0	0	1	0
1167	ENSMUSG00000039342.5	0	1	0	0	0	0
1168	ENSMUSG00000110487.1	0	0	0	0	0	0
1169	ENSMUSG00000110596.1	0	0	0	0	0	0
1170	ENSMUSG00000046330.10	1286	366	1114	1050	1915	1443
1171	ENSMUSG00000039323.18	777	205	479	910	861	1099
1172	ENSMUSG00000026185.8	4449	1199	4051	3920	4974	4351
1173	ENSMUSG00000101968.6	0	1	0	2	4	0
1174	ENSMUSG00000026182.6	0	0	0	0	0	0
1175	ENSMUSG00000102266.1	0	0	0	0	0	0
1176	ENSMUSG00000101112.1	0	0	0	0	2	0
1177	ENSMUSG00000100697.1	0	0	0	0	0	0
1178	ENSMUSG00000099877.6	0	0	0	0	0	0
1179	ENSMUSG00000098697.1	0	0	0	0	0	0
1180	ENSMUSG00000101812.1	0	0	0	0	0	0
1181	ENSMUSG00000100044.1	0	0	0	0	0	0
1182	ENSMUSG00000100444.1	0	0	0	0	0	0
1183	ENSMUSG00000100429.1	0	0	0	0	0	0
1184	ENSMUSG00000100301.6	13	7	1	2	6	7
1185	ENSMUSG00000101344.1	1	0	0	0	0	1
1186	ENSMUSG00000088666.1	0	0	0	0	0	0
1187	ENSMUSG00000098504.1	0	0	0	0	0	0
1188	ENSMUSG00000055322.16	1279	328	1023	1358	1027	1492
1189	ENSMUSG00000061815.11	0	0	1	0	0	1
1190	ENSMUSG00000026180.8	0	0	0	0	0	0
1191	ENSMUSG00000048480.5	0	0	0	0	0	0
1192	ENSMUSG00000087820.1	0	0	0	0	0	0
1193	ENSMUSG00000094768.1	0	0	0	0	0	0
1194	ENSMUSG00000006304.14	2861	1002	2572	3179	3372	3453
1195	ENSMUSG00000064272.3	0	0	0	0	0	0
1196	ENSMUSG00000006299.13	1771	598	1893	1878	2283	2487
1197	ENSMUSG00000101503.1	0	0	0	0	0	0
1198	ENSMUSG00000026179.14	3819	1311	4845	4814	5774	5661
1199	ENSMUSG00000103013.1	2	0	6	4	1	1
1200	ENSMUSG00000006301.17	496	150	628	591	683	701
1201	ENSMUSG00000099931.1	0	0	0	0	0	0
1202	ENSMUSG00000103403.1	4	3	15	9	9	4
1203	ENSMUSG00000073650.8	29	13	35	27	28	74
1204	ENSMUSG00000026177.11	51	17	27	36	39	59
1205	ENSMUSG00000026176.13	547	152	385	534	560	562
1206	ENSMUSG00000065468.1	0	1	1	0	0	4
1207	ENSMUSG00000026175.12	4	0	7	23	19	19
1208	ENSMUSG00000033364.13	552	190	488	574	630	573
1209	ENSMUSG00000103227.1	0	2	0	3	6	2
1210	ENSMUSG00000026174.9	482	138	526	484	598	636
1211	ENSMUSG00000026173.15	220	87	207	307	292	356
1212	ENSMUSG00000026135.17	757	259	818	1008	1001	1084
1213	ENSMUSG00000093155.1	0	0	0	1	3	0
1214	ENSMUSG00000026172.12	303	122	370	334	395	337
1215	ENSMUSG00000026171.12	679	283	776	791	979	1007
1216	ENSMUSG00000033276.18	87	39	142	159	124	146
1217	ENSMUSG00000033257.14	697	183	701	643	881	762
1218	ENSMUSG00000026170.6	92	15	108	97	81	91
1219	ENSMUSG00000006542.13	1	0	2	1	1	2
1220	ENSMUSG00000098351.1	0	0	0	0	0	0
1221	ENSMUSG00000033227.7	34	7	12	17	27	22
1222	ENSMUSG00000099472.1	1	0	0	0	4	2
1223	ENSMUSG00000026167.14	156	67	128	247	170	217
1224	ENSMUSG00000089964.1	7	2	6	1	2	3
1225	ENSMUSG00000090071.4	5396	1661	4989	6274	5730	6256
1226	ENSMUSG00000055197.4	0	0	2	0	1	1
1227	ENSMUSG00000006546.3	1	8	8	13	9	7
1228	ENSMUSG00000065616.3	0	0	0	0	0	0
1229	ENSMUSG00000047021.14	268	61	227	242	197	358
1230	ENSMUSG00000089653.1	0	0	0	0	0	0
1231	ENSMUSG00000006538.12	2	3	6	1	7	13
1232	ENSMUSG00000103145.1	0	0	0	0	5	6
1233	ENSMUSG00000026162.7	25	7	23	33	56	38
1234	ENSMUSG00000026205.8	21	5	10	7	28	21
1235	ENSMUSG00000033159.14	597	206	651	644	695	715
1236	ENSMUSG00000049339.16	3748	1323	3839	4101	4904	4749
1237	ENSMUSG00000026197.12	268	91	333	360	372	383
1238	ENSMUSG00000026198.15	27	4	32	26	28	27
1239	ENSMUSG00000099519.1	0	0	0	0	0	0
1240	ENSMUSG00000033124.16	1778	648	1917	1996	2196	2274
1241	ENSMUSG00000026199.17	622	193	526	674	567	830
1242	ENSMUSG00000026200.13	210	66	174	228	237	255
1243	ENSMUSG00000099204.2	0	0	0	0	0	0
1244	ENSMUSG00000026201.12	659	208	586	652	748	797
1245	ENSMUSG00000026202.13	8245	3195	9991	9450	11819	11446
1246	ENSMUSG00000096094.2	3	1	4	8	11	11
1247	ENSMUSG00000118482.1	0	0	0	0	0	0
1248	ENSMUSG00000026203.16	1544	519	1794	1789	2118	1994
1249	ENSMUSG00000026204.15	10893	4240	11142	12528	11452	14996
1250	ENSMUSG00000101840.1	9	5	15	12	20	23
1251	ENSMUSG00000033061.15	562	244	671	666	948	898
1252	ENSMUSG00000100556.1	4	0	5	6	4	5
1253	ENSMUSG00000026209.15	650	212	499	657	699	708
1254	ENSMUSG00000026208.9	36	10	21	75	36	36
1255	ENSMUSG00000085653.7	1	0	4	3	0	1
1256	ENSMUSG00000026207.16	2826	988	2886	3455	3198	4091
1257	ENSMUSG00000086053.1	0	0	3	5	1	2
1258	ENSMUSG00000033021.16	773	248	754	894	902	896
1259	ENSMUSG00000033007.15	94	20	60	98	101	162
1260	ENSMUSG00000102605.1	8	1	10	6	18	11
1261	ENSMUSG00000032997.16	1038	476	1200	1280	1147	1851
1262	ENSMUSG00000026211.17	454	149	360	486	485	583
1263	ENSMUSG00000051703.14	908	376	838	1003	896	1317
1264	ENSMUSG00000032968.4	366	121	456	490	391	543
1265	ENSMUSG00000082745.1	0	0	0	0	0	0
1266	ENSMUSG00000026213.15	886	310	968	931	1019	1067
1267	ENSMUSG00000082059.1	0	0	0	0	0	0
1268	ENSMUSG00000006576.16	3816	1398	3495	4133	4192	5162
1269	ENSMUSG00000083244.1	0	0	0	0	0	0
1270	ENSMUSG00000082528.1	0	0	1	0	0	0
1271	ENSMUSG00000082012.1	0	0	0	0	0	0
1272	ENSMUSG00000099996.1	0	0	1	0	0	2
1273	ENSMUSG00000101763.1	0	0	0	0	0	0
1274	ENSMUSG00000100827.1	0	0	0	4	2	0
1275	ENSMUSG00000100553.6	9	7	13	29	12	14
1276	ENSMUSG00000098611.1	0	0	0	0	0	0
1277	ENSMUSG00000100534.1	0	1	1	0	4	3
1278	ENSMUSG00000102904.1	0	0	2	0	0	0
1279	ENSMUSG00000089326.1	0	0	0	0	0	0
1280	ENSMUSG00000026235.14	5300	1535	4971	5159	6481	6049
1281	ENSMUSG00000099141.1	0	0	0	0	0	0
1282	ENSMUSG00000101849.1	13	4	4	13	12	19
1283	ENSMUSG00000101506.1	2	0	0	0	0	1
1284	ENSMUSG00000065215.1	0	0	0	0	0	0
1285	ENSMUSG00000102052.1	0	0	0	0	0	0
1286	ENSMUSG00000004872.15	0	0	0	0	0	0
1287	ENSMUSG00000118426.1	0	0	0	0	0	0
1288	ENSMUSG00000032908.9	359	135	688	435	786	622
1289	ENSMUSG00000099561.1	0	0	0	1	0	0
1290	ENSMUSG00000102945.1	0	0	0	0	0	1
1291	ENSMUSG00000026245.16	791	288	992	786	1113	978
1292	ENSMUSG00000101798.1	0	0	0	4	1	1
1293	ENSMUSG00000104018.1	20	14	26	18	38	48
1294	ENSMUSG00000090486.2	8	0	23	25	16	28
1295	ENSMUSG00000012187.13	6	0	1	2	1	1
1296	ENSMUSG00000099364.1	0	0	0	0	0	0
1297	ENSMUSG00000100562.1	0	0	0	0	0	0
1298	ENSMUSG00000032883.15	3203	1048	3090	3915	4309	4284
1299	ENSMUSG00000079470.8	182	68	173	264	292	335
1300	ENSMUSG00000099377.1	5	1	5	5	2	3
1301	ENSMUSG00000099706.1	0	0	0	0	0	0
1302	ENSMUSG00000047330.8	22	8	14	18	24	64
1303	ENSMUSG00000101324.1	0	0	0	0	0	1
1304	ENSMUSG00000072978.3	33	9	22	25	23	27
1305	ENSMUSG00000050711.7	4166	1395	3658	4054	4185	5862
1306	ENSMUSG00000099562.1	0	0	0	2	0	0
1307	ENSMUSG00000077782.1	0	0	0	0	0	0
1308	ENSMUSG00000054702.14	68	13	80	90	75	80
1309	ENSMUSG00000102235.1	0	0	1	0	1	0
1310	ENSMUSG00000073643.11	918	336	882	959	1114	1127
1311	ENSMUSG00000104497.1	0	0	0	0	0	0
1312	ENSMUSG00000026248.9	312	103	333	317	421	407
1313	ENSMUSG00000026249.10	2656	920	2168	2926	3478	3456
1314	ENSMUSG00000067106.6	14	4	22	15	32	33
1315	ENSMUSG00000100397.1	4	1	6	1	2	7
1316	ENSMUSG00000099753.1	0	0	0	0	0	0
1317	ENSMUSG00000096297.1	0	0	0	0	0	0
1318	ENSMUSG00000102518.1	0	0	0	0	0	0
1319	ENSMUSG00000099552.1	0	0	0	0	0	0
1320	ENSMUSG00000043230.2	0	0	1	0	0	1
1321	ENSMUSG00000101257.1	0	0	0	0	0	0
1322	ENSMUSG00000103404.1	0	0	0	0	0	0
1323	ENSMUSG00000004364.14	2491	792	2694	2417	3295	3146
1324	ENSMUSG00000103076.1	10	2	8	15	23	7
1325	ENSMUSG00000103525.1	0	0	0	0	0	0
1326	ENSMUSG00000101722.1	3	0	1	1	1	1
1327	ENSMUSG00000090637.2	0	0	0	0	0	0
1328	ENSMUSG00000101483.1	0	0	0	0	0	0
1329	ENSMUSG00000110100.1	0	0	0	0	0	0
1330	ENSMUSG00000038608.15	529	164	696	607	706	707
1331	ENSMUSG00000103192.1	0	1	0	0	0	0
1332	ENSMUSG00000104488.1	0	0	0	0	0	1
1333	ENSMUSG00000102721.1	0	0	1	0	0	0
1334	ENSMUSG00000099949.1	0	0	0	0	0	0
1335	ENSMUSG00000099918.1	0	0	0	0	0	0
1336	ENSMUSG00000054976.14	921	321	894	1079	1471	1381
1337	ENSMUSG00000104029.1	0	0	1	3	0	1
1338	ENSMUSG00000101986.1	0	0	1	2	1	0
1339	ENSMUSG00000087008.4	2	0	0	1	0	1
1340	ENSMUSG00000100561.1	0	0	0	0	1	0
1341	ENSMUSG00000103571.1	0	0	0	0	0	0
1342	ENSMUSG00000098797.1	0	0	0	0	0	0
1343	ENSMUSG00000055980.2	276	71	308	277	318	346
1344	ENSMUSG00000022591.5	0	0	0	0	0	0
1345	ENSMUSG00000026142.15	152	37	121	143	196	201
1346	ENSMUSG00000104493.1	1	1	1	1	0	0
1347	ENSMUSG00000100786.1	0	0	0	0	0	0
1348	ENSMUSG00000096779.1	0	0	0	0	0	0
1349	ENSMUSG00000067158.9	18	9	7	23	10	23
1350	ENSMUSG00000079465.8	14	3	11	12	18	22
1351	ENSMUSG00000065055.1	0	0	0	0	0	0
1352	ENSMUSG00000097564.2	0	1	6	0	2	0
1353	ENSMUSG00000026150.14	3043	1024	3231	3174	4075	3847
1354	ENSMUSG00000101450.1	34	8	47	32	53	44
1355	ENSMUSG00000026149.2	0	0	0	0	0	2
1356	ENSMUSG00000114299.1	0	0	0	0	0	0
1357	ENSMUSG00000099771.1	0	0	0	0	0	0
1358	ENSMUSG00000102280.1	0	0	0	0	0	0
1359	ENSMUSG00000100170.1	0	0	0	0	0	0
1360	ENSMUSG00000100744.1	0	0	0	0	0	0
1361	ENSMUSG00000093782.1	0	0	0	0	0	0
1362	ENSMUSG00000026159.13	2123	711	1959	2040	2325	2362
1363	ENSMUSG00000113880.1	3	0	10	3	11	3
1364	ENSMUSG00000113973.1	0	0	0	0	1	0
1365	ENSMUSG00000113846.1	0	0	0	0	0	0
1366	ENSMUSG00000113084.1	0	0	0	0	0	0
1367	ENSMUSG00000113925.1	0	0	0	0	0	0
1368	ENSMUSG00000114011.1	0	0	0	0	0	0
1369	ENSMUSG00000113097.1	0	0	0	0	0	0
1370	ENSMUSG00000101784.1	7	2	1	1	2	1
1371	ENSMUSG00000038496.16	60	8	37	56	47	82
1372	ENSMUSG00000100432.1	7	0	4	1	3	0
1373	ENSMUSG00000100190.1	1	0	1	0	3	0
1374	ENSMUSG00000113267.1	0	0	0	0	0	0
1375	ENSMUSG00000104423.1	0	0	0	0	0	0
1376	ENSMUSG00000101315.1	0	0	0	0	1	0
1377	ENSMUSG00000099691.1	0	0	0	0	0	0
1378	ENSMUSG00000026166.14	0	0	0	0	0	0
1379	ENSMUSG00000101173.1	0	0	0	0	0	0
1380	ENSMUSG00000053161.16	7	1	0	1	2	5
1381	ENSMUSG00000101896.1	0	0	0	0	0	0
1382	ENSMUSG00000084443.1	0	0	0	0	0	0
1383	ENSMUSG00000026163.17	4879	1501	3432	5689	6570	5847
1384	ENSMUSG00000079140.3	0	0	0	3	6	6
1385	ENSMUSG00000104374.1	0	0	8	1	6	3
1386	ENSMUSG00000104219.1	0	0	0	0	0	0
1387	ENSMUSG00000100580.6	0	0	0	0	0	0
1388	ENSMUSG00000094946.1	0	0	0	0	0	0
1389	ENSMUSG00000077736.1	0	0	0	0	0	0
1390	ENSMUSG00000045658.16	538	196	578	536	697	679
1391	ENSMUSG00000102750.1	0	0	0	2	0	0
1392	ENSMUSG00000101934.1	0	0	0	0	0	0
1393	ENSMUSG00000098851.1	0	0	0	0	0	0
1394	ENSMUSG00000036766.12	2314	773	2511	2694	3246	3360
1395	ENSMUSG00000104396.1	0	6	4	7	6	4
1396	ENSMUSG00000102481.1	1	0	0	0	0	1
1397	ENSMUSG00000093254.1	0	0	0	0	0	0
1398	ENSMUSG00000026219.14	3797	1280	4536	4310	5162	5131
1399	ENSMUSG00000103505.1	1	0	2	2	3	0
1400	ENSMUSG00000104503.1	5	0	6	6	0	2
1401	ENSMUSG00000073633.9	48	7	25	29	44	48
1402	ENSMUSG00000026220.6	138	28	143	151	145	198
1403	ENSMUSG00000118590.1	0	0	2	0	0	0
1404	ENSMUSG00000099693.1	0	0	0	0	0	0
1405	ENSMUSG00000052477.15	1	0	0	0	0	6
1406	ENSMUSG00000064281.7	3	1	5	5	4	10
1407	ENSMUSG00000098842.1	0	0	0	0	0	0
1408	ENSMUSG00000118640.1	0	0	0	0	0	0
1409	ENSMUSG00000061852.9	0	0	0	0	0	0
1410	ENSMUSG00000089976.1	0	0	0	0	0	0
1411	ENSMUSG00000101279.1	1	1	0	2	0	0
1412	ENSMUSG00000089844.7	9	4	3	16	7	9
1413	ENSMUSG00000073631.2	0	0	0	0	0	0
1414	ENSMUSG00000072109.11	0	0	0	2	0	1
1415	ENSMUSG00000090128.1	0	0	0	0	0	0
1416	ENSMUSG00000090186.7	0	0	0	0	0	0
1417	ENSMUSG00000089716.7	5	0	6	0	9	3
1418	ENSMUSG00000118618.1	0	0	0	0	0	0
1419	ENSMUSG00000079457.11	0	0	0	0	0	0
1420	ENSMUSG00000090252.1	0	0	0	0	0	0
1421	ENSMUSG00000079455.9	0	0	0	0	0	0
1422	ENSMUSG00000091199.10	0	0	0	0	0	0
1423	ENSMUSG00000089652.1	0	0	0	0	0	0
1424	ENSMUSG00000089937.1	0	0	0	0	0	0
1425	ENSMUSG00000118591.1	0	0	0	0	0	0
1426	ENSMUSG00000101751.1	2	1	1	1	4	1
1427	ENSMUSG00000089714.1	0	0	0	0	0	0
1428	ENSMUSG00000118607.1	0	0	0	0	0	0
1429	ENSMUSG00000118632.1	0	0	0	0	0	0
1430	ENSMUSG00000094127.1	0	0	0	0	0	0
1431	ENSMUSG00000070034.13	22	11	15	28	24	23
1432	ENSMUSG00000090103.1	0	0	0	0	0	0
1433	ENSMUSG00000070031.11	13	3	9	17	28	28
1434	ENSMUSG00000073628.5	0	0	0	0	0	0
1435	ENSMUSG00000090246.1	2	0	0	0	0	0
1436	ENSMUSG00000026222.16	86	19	39	114	71	95
1437	ENSMUSG00000064414.1	0	0	0	0	0	0
1438	ENSMUSG00000052760.16	15	8	16	25	11	29
1439	ENSMUSG00000098634.1	0	0	0	0	0	0
1440	ENSMUSG00000094834.1	0	0	0	0	0	0
1441	ENSMUSG00000100217.1	0	0	0	0	0	0
1442	ENSMUSG00000092932.2	0	0	0	0	0	0
1443	ENSMUSG00000036707.16	4088	1320	4348	4355	5237	5202
1444	ENSMUSG00000026223.15	12527	4197	10332	12460	12240	13814
1445	ENSMUSG00000026224.11	21	17	26	60	37	39
1446	ENSMUSG00000099767.1	21	1	4	23	12	8
1447	ENSMUSG00000049608.8	28	5	16	26	43	25
1448	ENSMUSG00000100108.1	0	0	0	0	0	0
1449	ENSMUSG00000099342.1	13	2	10	13	17	13
1450	ENSMUSG00000026226.16	11	3	6	28	6	25
1451	ENSMUSG00000026227.11	162	40	152	231	224	262
1452	ENSMUSG00000026229.17	1952	646	2127	2061	2607	2553
1453	ENSMUSG00000077274.1	5	0	0	0	0	6
1454	ENSMUSG00000026228.6	7	1	6	7	8	8
1455	ENSMUSG00000103272.1	20	3	11	26	21	5
1456	ENSMUSG00000094638.1	0	0	0	0	0	0
1457	ENSMUSG00000062590.13	585	183	683	606	732	750
1458	ENSMUSG00000087538.1	0	0	0	2	2	1
1459	ENSMUSG00000079445.3	11	7	13	36	22	32
1460	ENSMUSG00000099644.1	0	0	0	0	0	0
1461	ENSMUSG00000091806.1	0	0	0	0	0	0
1462	ENSMUSG00000101853.1	0	0	0	0	0	0
1463	ENSMUSG00000026234.12	4879	1580	5175	5332	6100	6269
1464	ENSMUSG00000064837.1	0	0	0	0	0	0
1465	ENSMUSG00000104627.1	0	0	0	0	0	0
1466	ENSMUSG00000064696.1	0	0	0	0	0	0
1467	ENSMUSG00000064823.1	0	0	0	0	0	1
1468	ENSMUSG00000073627.7	48	14	79	68	41	84
1469	ENSMUSG00000110510.1	0	0	0	0	0	1
1470	ENSMUSG00000026237.6	5	1	1	6	3	5
1471	ENSMUSG00000036574.5	0	0	0	0	0	0
1472	ENSMUSG00000101328.1	0	0	0	0	0	0
1473	ENSMUSG00000026238.14	1932	610	1947	1968	2231	2409
1474	ENSMUSG00000026239.14	432	145	388	535	559	510
1475	ENSMUSG00000102927.1	3	0	5	2	2	2
1476	ENSMUSG00000026240.12	383	161	381	392	485	492
1477	ENSMUSG00000084468.1	3	0	0	0	0	1
1478	ENSMUSG00000103609.1	3	1	0	2	1	3
1479	ENSMUSG00000026241.5	44	12	22	15	24	61
1480	ENSMUSG00000053333.15	599	199	602	570	784	673
1481	ENSMUSG00000100225.1	0	0	0	0	0	3
1482	ENSMUSG00000100768.1	0	0	1	1	0	0
1483	ENSMUSG00000104121.1	0	0	0	3	2	0
1484	ENSMUSG00000102383.1	0	0	0	0	7	4
1485	ENSMUSG00000104400.1	0	0	0	1	1	0
1486	ENSMUSG00000102293.1	0	1	2	0	0	0
1487	ENSMUSG00000102649.1	0	0	0	6	3	1
1488	ENSMUSG00000084106.4	461	157	393	482	541	597
1489	ENSMUSG00000102571.1	3	0	3	0	0	2
1490	ENSMUSG00000099401.1	0	0	0	0	0	0
1491	ENSMUSG00000102956.1	0	0	0	0	0	0
1492	ENSMUSG00000103984.1	18	4	22	24	33	9
1493	ENSMUSG00000101940.2	0	0	0	1	4	1
1494	ENSMUSG00000101625.1	0	0	0	0	0	0
1495	ENSMUSG00000026246.12	0	0	0	0	0	0
1496	ENSMUSG00000079440.2	0	0	0	1	0	0
1497	ENSMUSG00000100940.1	0	0	0	0	0	0
1498	ENSMUSG00000036500.4	0	0	0	0	0	1
1499	ENSMUSG00000099839.1	1	1	0	6	0	0
1500	ENSMUSG00000026247.13	23	14	19	109	39	74
1501	ENSMUSG00000036480.9	1	0	0	2	0	5
1502	ENSMUSG00000026251.13	0	0	0	0	0	0
1503	ENSMUSG00000026253.14	0	0	0	0	0	0
1504	ENSMUSG00000026254.17	1036	334	1089	1123	1223	1219
1505	ENSMUSG00000088318.1	2	0	0	2	0	4
1506	ENSMUSG00000026255.15	174	57	268	205	281	303
1507	ENSMUSG00000089821.1	0	0	0	0	0	0
1508	ENSMUSG00000048000.15	1460	477	1399	1563	1803	1509
1509	ENSMUSG00000095281.1	0	0	0	0	0	0
1510	ENSMUSG00000079436.3	41	1	3	22	27	20
1511	ENSMUSG00000089613.1	0	0	0	0	0	0
1512	ENSMUSG00000026258.5	2	2	8	5	0	11
1513	ENSMUSG00000026259.14	7738	2623	8339	8834	10427	10529
1514	ENSMUSG00000079434.8	142	58	133	151	253	192
1515	ENSMUSG00000091123.1	0	0	0	0	0	0
1516	ENSMUSG00000090994.1	0	1	7	5	2	8
1517	ENSMUSG00000026288.14	429	119	338	398	416	477
1518	ENSMUSG00000026289.15	1275	481	1526	1741	1796	1808
1519	ENSMUSG00000087968.1	2	3	3	5	5	4
1520	ENSMUSG00000089281.1	3	0	3	6	8	5
1521	ENSMUSG00000056055.13	76	23	55	74	76	75
1522	ENSMUSG00000070738.10	2583	859	2219	2527	3144	3059
1523	ENSMUSG00000101942.1	0	0	4	0	1	0
1524	ENSMUSG00000103996.1	0	0	0	0	0	0
1525	ENSMUSG00000103591.1	1	2	5	0	1	7
1526	ENSMUSG00000005501.14	443	137	587	660	644	638
1527	ENSMUSG00000095942.1	0	0	0	0	0	0
1528	ENSMUSG00000084021.1	0	0	0	1	0	1
1529	ENSMUSG00000083478.1	0	0	0	0	0	0
1530	ENSMUSG00000118514.1	0	0	0	0	0	0
1531	ENSMUSG00000090165.8	0	0	0	0	0	0
1532	ENSMUSG00000092220.1	0	0	0	0	0	0
1533	ENSMUSG00000118583.1	0	0	0	0	0	0
1534	ENSMUSG00000090175.1	0	0	0	0	0	0
1535	ENSMUSG00000089675.1	0	0	0	0	0	0
1536	ENSMUSG00000090124.7	3	0	10	8	9	16
1537	ENSMUSG00000082837.1	0	0	0	0	0	0
1538	ENSMUSG00000090145.7	0	0	0	0	0	0
1539	ENSMUSG00000084195.2	0	0	0	0	0	0
1540	ENSMUSG00000081261.1	0	0	0	0	0	0
1541	ENSMUSG00000054545.17	5	2	1	1	0	3
1542	ENSMUSG00000081602.1	0	0	0	0	0	0
1543	ENSMUSG00000082513.1	0	0	0	0	0	0
1544	ENSMUSG00000082677.1	0	0	0	0	0	0
1545	ENSMUSG00000089943.1	0	0	0	0	0	0
1546	ENSMUSG00000118621.1	0	0	0	0	0	0
1547	ENSMUSG00000081488.1	0	0	0	0	0	0
1548	ENSMUSG00000083277.1	0	0	0	0	0	0
1549	ENSMUSG00000090171.1	0	0	0	0	0	0
1550	ENSMUSG00000081984.3	6	10	11	8	5	10
1551	ENSMUSG00000089960.1	0	0	0	3	0	0
1552	ENSMUSG00000079429.9	65	30	96	86	150	115
1553	ENSMUSG00000044783.16	1549	514	2094	2303	2743	2729
1554	ENSMUSG00000036251.16	2	0	5	2	4	0
1555	ENSMUSG00000085420.1	0	0	0	0	0	0
1556	ENSMUSG00000026295.12	7	0	0	2	5	5
1557	ENSMUSG00000099553.1	0	0	0	0	0	0
1558	ENSMUSG00000100908.1	0	0	0	0	0	0
1559	ENSMUSG00000062310.7	1	0	1	2	2	5
1560	ENSMUSG00000100798.1	0	2	0	0	0	0
1561	ENSMUSG00000104057.1	0	0	0	0	0	0
1562	ENSMUSG00000100367.1	0	0	0	0	0	0
1563	ENSMUSG00000049866.12	1351	429	1424	1424	1789	1812
1564	ENSMUSG00000101736.1	0	0	1	0	0	0
1565	ENSMUSG00000097398.2	0	0	0	0	0	0
1566	ENSMUSG00000099848.1	0	0	0	0	0	0
1567	ENSMUSG00000101333.1	0	0	0	0	0	0
1568	ENSMUSG00000099378.1	0	0	0	0	0	0
1569	ENSMUSG00000099544.1	0	0	0	3	0	0
1570	ENSMUSG00000036206.12	326	88	289	289	292	332
1571	ENSMUSG00000102700.1	0	0	0	0	2	1
1572	ENSMUSG00000102083.1	0	0	0	0	0	0
1573	ENSMUSG00000101288.1	0	0	0	0	0	0
1574	ENSMUSG00000099938.1	0	0	0	0	0	0
1575	ENSMUSG00000055013.16	2573	835	3250	2784	3145	3323
1576	ENSMUSG00000104114.1	1	0	0	0	0	0
1577	ENSMUSG00000088371.1	0	0	0	3	0	0
1578	ENSMUSG00000101662.1	0	0	5	0	0	0
1579	ENSMUSG00000102009.6	0	0	0	2	2	0
1580	ENSMUSG00000088775.1	0	0	0	0	0	0
1581	ENSMUSG00000103252.1	2	0	2	0	5	3
1582	ENSMUSG00000034486.8	0	0	0	0	0	0
1583	ENSMUSG00000092627.2	0	0	0	2	0	0
1584	ENSMUSG00000067081.13	17	9	51	34	29	48
1585	ENSMUSG00000026301.16	10	5	4	3	3	19
1586	ENSMUSG00000100850.1	0	0	0	0	0	0
1587	ENSMUSG00000044337.5	157	39	87	143	151	154
1588	ENSMUSG00000104087.1	0	0	0	0	0	0
1589	ENSMUSG00000101951.1	0	0	0	0	0	0
1590	ENSMUSG00000101028.1	3	1	2	0	1	1
1591	ENSMUSG00000098368.1	0	0	0	0	0	0
1592	ENSMUSG00000101997.1	0	0	4	0	2	4
1593	ENSMUSG00000103292.1	3	0	0	0	1	0
1594	ENSMUSG00000034432.11	1454	495	1463	1532	1842	1756
1595	ENSMUSG00000056128.3	0	0	0	0	0	0
1596	ENSMUSG00000048126.16	73	23	49	67	71	83
1597	ENSMUSG00000103061.1	0	0	0	0	0	0
1598	ENSMUSG00000103978.1	0	0	0	0	0	0
1599	ENSMUSG00000026303.6	53	9	26	45	49	67
1600	ENSMUSG00000090550.2	0	0	2	0	0	0
1601	ENSMUSG00000026304.13	0	1	0	1	0	0
1602	ENSMUSG00000100791.1	0	0	0	0	0	0
1603	ENSMUSG00000026305.15	1224	379	1307	1283	1537	1482
1604	ENSMUSG00000070732.2	1	0	0	2	0	5
1605	ENSMUSG00000100018.1	2	0	0	0	0	0
1606	ENSMUSG00000034353.14	959	312	905	1075	1334	1271
1607	ENSMUSG00000034343.14	931	341	1056	1140	1259	1193
1608	ENSMUSG00000083064.1	8	4	8	8	14	18
1609	ENSMUSG00000026307.12	243	86	345	342	354	426
1610	ENSMUSG00000090322.1	0	0	0	2	1	0
1611	ENSMUSG00000049515.12	19	18	25	17	13	27
1612	ENSMUSG00000026308.8	5	1	1	11	1	7
1613	ENSMUSG00000047443.14	3	10	37	13	1	10
1614	ENSMUSG00000026309.14	603	173	646	676	762	830
1615	ENSMUSG00000100253.1	1	0	5	3	0	0
1616	ENSMUSG00000067071.8	114	32	123	155	146	182
1617	ENSMUSG00000055866.9	896	286	816	1082	998	1197
1618	ENSMUSG00000101911.1	0	0	0	0	0	0
1619	ENSMUSG00000100151.1	0	0	0	0	0	0
1620	ENSMUSG00000101958.1	0	0	0	0	0	1
1621	ENSMUSG00000034292.13	363	135	396	418	476	542
1622	ENSMUSG00000026311.16	1007	347	1010	1123	1301	1309
1623	ENSMUSG00000101705.1	0	0	0	0	0	0
1624	ENSMUSG00000100980.1	41	14	17	32	26	40
1625	ENSMUSG00000007805.4	8	1	8	5	7	4
1626	ENSMUSG00000101414.1	0	0	1	1	0	2
1627	ENSMUSG00000102745.1	3	0	0	0	0	3
1628	ENSMUSG00000026313.16	1503	491	1798	1653	2037	1838
1629	ENSMUSG00000103101.1	2	0	0	9	2	2
1630	ENSMUSG00000102565.1	0	0	0	0	0	1
1631	ENSMUSG00000101265.1	0	0	0	0	0	0
1632	ENSMUSG00000101522.1	0	0	0	0	0	0
1633	ENSMUSG00000026260.12	2415	885	2807	2728	3331	3206
1634	ENSMUSG00000098288.1	0	0	0	0	0	0
1635	ENSMUSG00000067064.4	0	0	0	0	0	0
1636	ENSMUSG00000057464.4	0	0	0	0	0	0
1637	ENSMUSG00000042849.11	0	0	0	0	0	0
1638	ENSMUSG00000058904.3	0	0	0	0	0	0
1639	ENSMUSG00000097001.1	0	0	0	0	0	0
1640	ENSMUSG00000099363.1	0	0	0	0	0	0
1641	ENSMUSG00000046300.4	0	0	0	0	0	0
1642	ENSMUSG00000107778.1	0	0	0	0	0	0
1643	ENSMUSG00000062497.3	0	0	0	0	0	0
1644	ENSMUSG00000108131.1	0	0	0	0	0	0
1645	ENSMUSG00000063583.6	0	0	0	0	1	0
1646	ENSMUSG00000061616.5	0	0	0	0	0	0
1647	ENSMUSG00000073616.10	564	205	510	512	732	663
1648	ENSMUSG00000044055.5	4	0	5	3	7	6
1649	ENSMUSG00000100546.1	5	1	9	1	5	4
1650	ENSMUSG00000099665.1	0	0	0	0	0	0
1651	ENSMUSG00000100781.1	0	0	0	1	1	0
1652	ENSMUSG00000034220.7	1157	543	1319	1220	1147	1473
1653	ENSMUSG00000101995.1	8	3	7	14	4	10
1654	ENSMUSG00000065470.1	0	0	0	0	2	0
1655	ENSMUSG00000034212.14	3	0	3	12	13	3
1656	ENSMUSG00000047067.7	253	112	292	293	388	368
1657	ENSMUSG00000097251.2	45	20	72	46	60	62
1658	ENSMUSG00000026269.14	709	209	554	723	701	937
1659	ENSMUSG00000100632.1	2	0	3	6	6	5
1660	ENSMUSG00000026270.11	415	148	417	504	594	594
1661	ENSMUSG00000026271.15	7	1	1	7	7	8
1662	ENSMUSG00000100021.1	1	0	4	0	0	0
1663	ENSMUSG00000045091.4	0	0	0	0	1	2
1664	ENSMUSG00000014602.15	31384	11243	40315	38239	44259	45594
1665	ENSMUSG00000101378.1	0	0	0	3	0	0
1666	ENSMUSG00000026272.6	0	2	0	0	0	0
1667	ENSMUSG00000034159.12	0	1	0	0	0	0
1668	ENSMUSG00000084989.3	25	4	7	9	8	32
1669	ENSMUSG00000047793.13	740	132	292	442	505	500
1670	ENSMUSG00000098997.1	0	0	0	0	0	0
1671	ENSMUSG00000026273.13	233	84	157	212	261	261
1672	ENSMUSG00000101172.1	1	3	1	11	3	4
1673	ENSMUSG00000100351.1	0	2	4	0	12	5
1674	ENSMUSG00000026274.11	109	34	109	104	117	125
1675	ENSMUSG00000026275.13	2105	684	2424	2188	2856	2555
1676	ENSMUSG00000106302.1	0	0	0	0	0	0
1677	ENSMUSG00000098689.1	0	0	0	0	0	0
1678	ENSMUSG00000064389.1	4	5	3	6	3	4
1679	ENSMUSG00000034107.10	4	2	7	6	5	5
1680	ENSMUSG00000034088.15	4538	1466	4742	4759	5575	5618
1681	ENSMUSG00000090489.3	1	3	0	8	13	10
1682	ENSMUSG00000026276.20	30	17	43	44	38	45
1683	ENSMUSG00000116048.1	0	0	0	0	0	0
1684	ENSMUSG00000034066.13	93	40	133	167	203	157
1685	ENSMUSG00000103854.1	0	0	1	0	0	2
1686	ENSMUSG00000026277.14	3587	1356	4503	4261	5151	5141
1687	ENSMUSG00000100927.1	0	0	1	3	1	3
1688	ENSMUSG00000026278.14	426	260	669	496	686	880
1689	ENSMUSG00000026279.14	228	89	227	227	243	256
1690	ENSMUSG00000101952.1	0	0	1	0	0	0
1691	ENSMUSG00000026280.17	1264	422	1364	1357	1686	1604
1692	ENSMUSG00000026281.15	319	79	319	343	411	433
1693	ENSMUSG00000026283.13	295	82	306	407	393	480
1694	ENSMUSG00000088961.1	0	0	0	0	0	0
1695	ENSMUSG00000073609.9	184	62	184	195	234	184
1696	ENSMUSG00000094651.2	0	0	0	0	0	0
1697	ENSMUSG00000101660.1	0	2	1	0	1	1
1698	ENSMUSG00000093805.7	0	0	0	0	0	0
1699	ENSMUSG00000099624.1	1	1	1	0	1	3
1700	ENSMUSG00000073608.4	0	0	0	0	0	3
1701	ENSMUSG00000034000.15	170	32	107	128	130	152
1702	ENSMUSG00000026285.7	3	0	8	2	2	4
1703	ENSMUSG00000100990.1	0	0	0	0	0	0
1704	ENSMUSG00000100347.1	34	19	53	15	60	47
1705	ENSMUSG00000077413.1	0	0	0	0	0	0
1706	ENSMUSG00000100518.1	0	0	0	0	0	0
1707	ENSMUSG00000089310.1	0	0	0	0	0	0
1708	ENSMUSG00000099592.1	0	0	0	0	0	0
1709	ENSMUSG00000051185.9	372	148	476	440	540	594
1710	ENSMUSG00000103973.1	9	1	12	13	14	32
1711	ENSMUSG00000081051.4	658	205	617	598	860	711
1712	ENSMUSG00000040710.10	204	50	241	196	301	265
1713	ENSMUSG00000103197.1	0	0	0	0	0	0
1714	ENSMUSG00000100777.1	0	0	0	0	0	0
1715	ENSMUSG00000102718.1	0	0	0	0	0	0
1716	ENSMUSG00000095955.1	0	0	0	0	0	0
1717	ENSMUSG00000100062.1	0	0	0	0	0	0
1718	ENSMUSG00000080345.3	0	0	0	0	0	0
1719	ENSMUSG00000096585.1	0	0	0	0	0	0
1720	ENSMUSG00000102658.1	0	0	0	0	0	0
1721	ENSMUSG00000100336.1	0	0	0	0	0	0
1722	ENSMUSG00000100589.1	0	0	0	0	0	0
1723	ENSMUSG00000095610.1	0	0	0	0	0	0
1724	ENSMUSG00000100362.1	2	0	0	0	6	3
1725	ENSMUSG00000077255.1	0	0	0	0	0	0
1726	ENSMUSG00000040693.7	84	31	99	86	70	99
1727	ENSMUSG00000097814.5	132	52	133	114	121	156
1728	ENSMUSG00000045463.15	0	1	0	0	3	0
1729	ENSMUSG00000097480.1	0	0	0	0	0	0
1730	ENSMUSG00000100454.1	4	3	2	2	13	5
1731	ENSMUSG00000044757.7	3	0	7	11	4	9
1732	ENSMUSG00000026331.13	0	0	1	0	4	0
1733	ENSMUSG00000100484.1	0	0	0	1	1	4
1734	ENSMUSG00000101348.6	0	0	0	3	2	2
1735	ENSMUSG00000103179.1	0	0	0	1	0	0
1736	ENSMUSG00000044768.16	1341	485	1545	1790	2164	1838
1737	ENSMUSG00000118489.1	0	0	0	0	0	0
1738	ENSMUSG00000040648.14	718	281	1195	1060	1462	1203
1739	ENSMUSG00000026333.14	124	33	158	192	166	153
1740	ENSMUSG00000026335.16	4755	1497	3400	4483	5084	5645
1741	ENSMUSG00000104140.1	3	3	8	15	6	15
1742	ENSMUSG00000089169.1	0	0	0	0	0	0
1743	ENSMUSG00000089782.1	38	11	40	48	51	37
1744	ENSMUSG00000089706.7	214	48	140	260	206	287
1745	ENSMUSG00000096085.1	2	0	0	0	0	0
1746	ENSMUSG00000100182.6	0	0	0	0	0	0
1747	ENSMUSG00000100711.1	0	0	0	1	0	1
1748	ENSMUSG00000097608.1	0	0	0	0	0	0
1749	ENSMUSG00000099634.1	1	0	0	5	0	1
1750	ENSMUSG00000026336.13	1	0	0	0	0	1
1751	ENSMUSG00000089791.1	11	6	19	23	9	12
1752	ENSMUSG00000096193.1	0	0	0	0	0	0
1753	ENSMUSG00000100009.6	15	3	10	4	17	25
1754	ENSMUSG00000099686.1	2	2	2	7	1	1
1755	ENSMUSG00000087804.1	0	0	0	0	0	0
1756	ENSMUSG00000099453.1	0	0	0	0	0	0
1757	ENSMUSG00000067028.11	185	60	214	283	392	265
1758	ENSMUSG00000082431.3	2	5	4	0	8	5
1759	ENSMUSG00000104104.1	0	0	0	0	0	0
1760	ENSMUSG00000100662.1	0	0	0	0	0	0
1761	ENSMUSG00000087883.1	0	0	0	0	0	0
1762	ENSMUSG00000099835.1	7	0	8	3	11	7
1763	ENSMUSG00000100794.1	161	61	154	207	270	201
1764	ENSMUSG00000099427.1	0	0	0	0	0	0
1765	ENSMUSG00000099892.1	0	0	0	0	0	0
1766	ENSMUSG00000100977.1	0	0	0	0	0	0
1767	ENSMUSG00000077039.1	0	0	0	0	0	0
1768	ENSMUSG00000100684.1	0	0	0	0	0	0
1769	ENSMUSG00000100088.1	0	0	0	0	0	0
1770	ENSMUSG00000100222.1	4	1	7	5	4	12
1771	ENSMUSG00000100065.1	0	0	0	0	0	0
1772	ENSMUSG00000100349.1	0	0	0	0	0	0
1773	ENSMUSG00000099375.1	4	0	2	2	0	3
1774	ENSMUSG00000077295.1	0	0	0	0	0	0
1775	ENSMUSG00000099770.1	0	0	0	0	0	0
1776	ENSMUSG00000088510.1	0	0	0	0	0	0
1777	ENSMUSG00000101890.1	0	0	0	0	0	0
1778	ENSMUSG00000099989.1	0	0	0	0	0	0
1779	ENSMUSG00000087908.1	0	0	0	0	0	0
1780	ENSMUSG00000100955.1	0	0	0	0	0	0
1781	ENSMUSG00000088594.1	0	0	0	0	0	0
1782	ENSMUSG00000099469.1	0	0	0	0	0	0
1783	ENSMUSG00000102325.1	0	0	0	0	0	0
1784	ENSMUSG00000101297.1	0	0	0	0	0	0
1785	ENSMUSG00000100059.1	0	0	0	0	0	0
1786	ENSMUSG00000088161.1	0	0	0	0	0	0
1787	ENSMUSG00000099464.1	0	0	0	0	0	0
1788	ENSMUSG00000100935.1	0	0	0	0	0	0
1789	ENSMUSG00000099801.1	0	0	0	0	0	0
1790	ENSMUSG00000050840.8	460	165	466	500	501	599
1791	ENSMUSG00000103991.1	2	0	4	2	0	1
1792	ENSMUSG00000084704.1	0	0	0	0	0	0
1793	ENSMUSG00000103060.1	0	0	1	0	3	0
1794	ENSMUSG00000089866.1	0	0	0	2	0	0
1795	ENSMUSG00000099669.1	0	0	0	0	0	0
1796	ENSMUSG00000099702.1	0	0	0	0	0	0
1797	ENSMUSG00000047496.6	202	84	617	267	226	386
1798	ENSMUSG00000099582.1	0	0	0	0	0	0
1799	ENSMUSG00000097482.2	5	0	10	6	1	3
1800	ENSMUSG00000101214.1	0	0	1	0	4	2
1801	ENSMUSG00000067017.5	86	16	61	65	106	54
1802	ENSMUSG00000056536.14	319	116	382	424	439	443
1803	ENSMUSG00000100672.1	0	0	0	0	0	0
1804	ENSMUSG00000101219.1	0	0	0	4	0	3
1805	ENSMUSG00000076999.1	0	0	0	0	0	0
1806	ENSMUSG00000101656.1	0	0	0	0	0	1
1807	ENSMUSG00000026319.13	1216	473	1372	1447	1592	1752
1808	ENSMUSG00000104044.1	0	0	4	0	0	0
1809	ENSMUSG00000101330.1	5	0	0	0	0	1
1810	ENSMUSG00000026321.7	154	53	126	185	211	194
1811	ENSMUSG00000102690.1	0	0	0	0	0	1
1812	ENSMUSG00000089206.1	0	0	0	0	0	0
1813	ENSMUSG00000099448.1	0	0	0	0	0	0
1814	ENSMUSG00000099843.1	25	13	33	23	37	40
1815	ENSMUSG00000038866.15	636	212	647	773	759	782
1816	ENSMUSG00000102501.1	0	1	1	0	0	2
1817	ENSMUSG00000097612.1	2	1	3	4	13	4
1818	ENSMUSG00000101583.1	3	0	4	8	7	1
1819	ENSMUSG00000044340.7	1637	632	2119	1913	2278	2288
1820	ENSMUSG00000103291.1	1	0	3	2	0	1
1821	ENSMUSG00000100247.1	0	0	1	0	0	0
1822	ENSMUSG00000099604.1	0	0	0	0	0	0
1823	ENSMUSG00000057329.7	394	100	356	350	384	412
1824	ENSMUSG00000054006.14	0	0	0	0	0	0
1825	ENSMUSG00000098344.1	0	0	0	0	0	0
1826	ENSMUSG00000103348.1	0	0	0	1	0	0
1827	ENSMUSG00000009905.5	674	244	708	676	1019	909
1828	ENSMUSG00000009907.17	878	299	880	936	1168	1240
1829	ENSMUSG00000067006.12	5	1	0	0	1	1
1830	ENSMUSG00000083613.1	0	0	0	0	0	0
1831	ENSMUSG00000059956.14	0	0	0	0	0	0
1832	ENSMUSG00000048775.10	1	0	0	0	0	0
1833	ENSMUSG00000084228.1	0	0	0	0	0	0
1834	ENSMUSG00000044594.14	0	0	0	0	0	0
1835	ENSMUSG00000058017.6	0	0	0	0	0	0
1836	ENSMUSG00000083884.1	0	0	0	0	0	0
1837	ENSMUSG00000073602.10	0	0	0	0	0	0
1838	ENSMUSG00000080729.1	0	0	0	0	0	0
1839	ENSMUSG00000081114.1	0	0	0	0	0	0
1840	ENSMUSG00000073601.2	0	0	0	0	0	0
1841	ENSMUSG00000084189.1	0	0	0	0	0	0
1842	ENSMUSG00000026327.8	0	0	0	0	0	0
1843	ENSMUSG00000087210.1	0	0	0	0	0	0
1844	ENSMUSG00000067001.11	0	0	0	0	0	0
1845	ENSMUSG00000089278.1	0	0	0	0	0	0
1846	ENSMUSG00000062345.10	0	0	0	0	0	0
1847	ENSMUSG00000092572.7	1	0	0	2	1	0
1848	ENSMUSG00000026315.13	466	138	444	507	365	540
1849	ENSMUSG00000086161.1	0	0	0	0	0	0
1850	ENSMUSG00000096241.1	0	0	0	0	0	0
1851	ENSMUSG00000077237.1	0	0	0	0	0	0
1852	ENSMUSG00000100457.6	0	0	0	0	0	0
1853	ENSMUSG00000101477.1	0	0	0	0	0	0
1854	ENSMUSG00000099484.1	0	0	0	0	0	0
1855	ENSMUSG00000100041.1	0	0	0	0	0	0
1856	ENSMUSG00000104478.1	0	0	0	0	0	0
1857	ENSMUSG00000101231.1	0	0	0	0	0	0
1858	ENSMUSG00000101097.1	0	0	0	0	0	0
1859	ENSMUSG00000100831.1	0	0	0	0	0	0
1860	ENSMUSG00000100884.1	0	0	0	0	0	0
1861	ENSMUSG00000089037.1	0	0	0	0	0	0
1862	ENSMUSG00000084741.1	0	0	0	0	0	0
1863	ENSMUSG00000100025.1	0	0	0	3	0	0
1864	ENSMUSG00000026312.17	561	151	528	617	789	749
1865	ENSMUSG00000100290.1	0	0	0	0	0	0
1866	ENSMUSG00000100758.1	0	0	0	0	0	0
1867	ENSMUSG00000099926.1	0	0	0	0	0	0
1868	ENSMUSG00000047216.8	160	69	200	277	261	245
1869	ENSMUSG00000102788.1	1	1	15	11	17	16
1870	ENSMUSG00000102160.1	3	1	14	11	10	8
1871	ENSMUSG00000101253.1	0	0	1	0	0	0
1872	ENSMUSG00000101846.1	0	0	0	0	0	0
1873	ENSMUSG00000100555.1	0	0	3	0	2	0
1874	ENSMUSG00000102728.1	0	0	0	0	0	0
1875	ENSMUSG00000038702.6	236	106	217	164	229	245
1876	ENSMUSG00000101875.1	0	0	0	0	0	5
1877	ENSMUSG00000099732.2	0	0	0	0	0	0
1878	ENSMUSG00000101220.1	0	0	0	0	0	0
1879	ENSMUSG00000100020.1	0	0	0	0	0	0
1880	ENSMUSG00000101054.1	14	0	6	4	4	13
1881	ENSMUSG00000088691.1	0	0	0	0	0	0
1882	ENSMUSG00000099884.1	0	0	0	0	0	0
1883	ENSMUSG00000100304.1	0	0	0	0	0	0
1884	ENSMUSG00000101453.1	0	0	0	0	0	0
1885	ENSMUSG00000102105.1	0	0	0	0	0	0
1886	ENSMUSG00000099943.1	0	0	0	0	0	0
1887	ENSMUSG00000084546.1	0	0	0	0	0	0
1888	ENSMUSG00000097648.1	0	1	0	0	0	0
1889	ENSMUSG00000101687.1	0	0	0	0	0	0
1890	ENSMUSG00000100515.6	25	7	21	27	42	32
1891	ENSMUSG00000070695.4	1368	412	1351	1797	2480	1781
1892	ENSMUSG00000092948.1	0	0	0	0	0	0
1893	ENSMUSG00000102033.1	0	0	0	0	0	0
1894	ENSMUSG00000094429.2	0	0	0	0	0	0
1895	ENSMUSG00000101154.1	0	0	0	0	0	0
1896	ENSMUSG00000065865.1	0	0	0	0	0	0
1897	ENSMUSG00000098815.1	0	0	0	0	0	0
1898	ENSMUSG00000101573.1	0	0	0	0	0	0
1899	ENSMUSG00000107979.1	0	0	0	0	0	0
1900	ENSMUSG00000101373.2	0	0	0	0	0	1
1901	ENSMUSG00000099615.1	0	0	0	0	0	0
1902	ENSMUSG00000100265.1	0	0	0	0	0	0
1903	ENSMUSG00000100527.1	0	0	0	0	0	0
1904	ENSMUSG00000099571.1	0	0	0	0	0	0
1905	ENSMUSG00000101303.1	0	0	0	0	0	0
1906	ENSMUSG00000100305.1	0	0	0	0	0	0
1907	ENSMUSG00000099534.1	0	0	0	0	0	0
1908	ENSMUSG00000100886.1	0	0	0	0	0	0
1909	ENSMUSG00000101415.1	0	0	0	0	0	0
1910	ENSMUSG00000100617.1	0	0	0	0	0	0
1911	ENSMUSG00000100703.6	0	0	0	0	0	0
1912	ENSMUSG00000100177.1	0	0	0	0	0	0
1913	ENSMUSG00000101363.1	0	0	0	0	0	0
1914	ENSMUSG00000101590.1	0	0	0	0	0	0
1915	ENSMUSG00000102030.1	4	0	0	3	2	2
1916	ENSMUSG00000099870.1	0	0	0	0	0	0
1917	ENSMUSG00000026374.14	1471	553	1650	1635	2026	1946
1918	ENSMUSG00000026377.12	356	91	303	368	440	431
1919	ENSMUSG00000099936.1	0	0	0	0	0	0
1920	ENSMUSG00000064302.13	3386	1007	3437	3370	3858	3960
1921	ENSMUSG00000077257.1	0	0	0	0	0	0
1922	ENSMUSG00000107722.1	0	0	0	0	0	2
1923	ENSMUSG00000080542.1	0	0	0	0	0	0
1924	ENSMUSG00000100770.1	0	0	0	0	0	2
1925	ENSMUSG00000026380.10	289	66	101	283	300	279
1926	ENSMUSG00000089601.1	0	0	0	0	0	0
1927	ENSMUSG00000101624.1	0	0	0	0	0	0
1928	ENSMUSG00000088363.1	0	0	0	0	0	0
1929	ENSMUSG00000100040.1	0	0	0	0	0	0
1930	ENSMUSG00000048402.14	105	41	113	167	162	140
1931	ENSMUSG00000098273.1	0	0	0	0	0	0
1932	ENSMUSG00000097408.1	1	1	1	3	0	2
1933	ENSMUSG00000096939.1	0	0	0	0	0	0
1934	ENSMUSG00000100767.1	0	0	0	0	0	0
1935	ENSMUSG00000099860.1	1	0	0	0	0	0
1936	ENSMUSG00000101179.1	0	0	7	4	1	0
1937	ENSMUSG00000037035.5	66	35	92	62	109	127
1938	ENSMUSG00000004451.14	304	105	307	426	495	430
1939	ENSMUSG00000101437.1	0	0	2	0	0	2
1940	ENSMUSG00000098447.2	2	1	1	3	4	2
1941	ENSMUSG00000098923.1	181	45	162	220	206	239
1942	ENSMUSG00000101731.1	4	0	2	4	0	1
1943	ENSMUSG00000084505.1	0	0	0	0	0	0
1944	ENSMUSG00000026383.14	220	62	136	364	347	312
1945	ENSMUSG00000102687.1	0	0	0	0	1	0
1946	ENSMUSG00000026384.13	1985	686	2743	2592	3802	2790
1947	ENSMUSG00000091876.1	1	2	0	0	1	0
1948	ENSMUSG00000103146.1	3	0	7	3	3	2
1949	ENSMUSG00000100436.1	0	0	0	0	0	0
1950	ENSMUSG00000090277.1	0	0	0	0	0	0
1951	ENSMUSG00000100042.1	0	0	0	0	0	0
1952	ENSMUSG00000100636.1	3	1	2	0	0	3
1953	ENSMUSG00000101224.1	6	0	3	5	4	5
1954	ENSMUSG00000036975.5	148	62	215	176	266	222
1955	ENSMUSG00000036962.12	6	0	3	1	1	14
1956	ENSMUSG00000092245.1	0	0	0	0	0	0
1957	ENSMUSG00000026387.15	8	1	3	4	13	7
1958	ENSMUSG00000050777.7	25	12	23	68	47	34
1959	ENSMUSG00000026385.16	1126	297	833	1140	1451	1414
1960	ENSMUSG00000026388.15	10	7	12	22	20	23
1961	ENSMUSG00000026389.16	139	36	84	157	172	140
1962	ENSMUSG00000036907.9	7	4	9	12	5	12
1963	ENSMUSG00000101275.1	0	0	0	0	0	0
1964	ENSMUSG00000026390.7	0	0	0	0	0	0
1965	ENSMUSG00000058665.8	0	0	0	0	0	0
1966	ENSMUSG00000099957.4	0	0	0	0	0	0
1967	ENSMUSG00000101386.1	0	0	0	0	0	0
1968	ENSMUSG00000101922.1	0	0	0	0	0	0
1969	ENSMUSG00000100761.1	0	0	0	0	0	0
1970	ENSMUSG00000099336.1	0	0	0	0	0	0
1971	ENSMUSG00000100979.1	0	0	0	0	0	0
1972	ENSMUSG00000102360.1	0	0	0	0	0	0
1973	ENSMUSG00000097881.7	59	9	46	45	60	61
1974	ENSMUSG00000101700.1	0	0	3	0	0	0
1975	ENSMUSG00000104332.1	0	0	0	3	0	0
1976	ENSMUSG00000003721.14	710	233	803	698	1034	1092
1977	ENSMUSG00000104253.1	15	9	13	22	23	41
1978	ENSMUSG00000101791.1	0	0	0	0	0	0
1979	ENSMUSG00000026339.18	733	231	782	905	1075	941
1980	ENSMUSG00000085857.1	3	0	1	0	4	1
1981	ENSMUSG00000083582.1	0	0	0	0	0	0
1982	ENSMUSG00000050534.8	6	3	3	3	7	15
1983	ENSMUSG00000081130.1	0	0	0	0	0	0
1984	ENSMUSG00000001674.11	355	90	281	362	414	376
1985	ENSMUSG00000102006.1	0	0	0	0	0	0
1986	ENSMUSG00000102488.1	0	0	0	1	0	0
1987	ENSMUSG00000083584.1	0	0	0	0	0	0
1988	ENSMUSG00000100913.1	0	0	0	0	0	2
1989	ENSMUSG00000080410.2	0	0	0	0	0	0
1990	ENSMUSG00000099960.1	0	0	0	1	1	0
1991	ENSMUSG00000089274.1	0	0	0	0	0	0
1992	ENSMUSG00000103263.1	0	0	0	0	0	0
1993	ENSMUSG00000089190.1	0	0	0	0	0	0
1994	ENSMUSG00000099451.1	0	0	0	0	0	0
1995	ENSMUSG00000104180.1	0	0	0	0	0	0
1996	ENSMUSG00000100762.1	0	0	0	0	0	0
1997	ENSMUSG00000100405.1	0	0	0	0	0	0
1998	ENSMUSG00000100525.1	0	0	0	0	0	0
1999	ENSMUSG00000101495.1	0	0	0	0	0	0
[truncated: 53,488 more rows]

## Sheet: Cortex DESeq Results
	Gene	baseMean	log2FoldChange	lfcSE	stat	pvalue	padj	chromosome_name	start_position	end_position	gene_biotype	mgi_symbol
1	ENSMUSG00000000001	410.854	0.0524437	0.100516	-0.521745	0.601848	0.943197	3	108014596	108053462	protein_coding	Gnai3
2	ENSMUSG00000000003	0	NA	NA	NA	NA	NA	X	76881507	76897229	protein_coding	Pbsn
3	ENSMUSG00000000028	24.2329	-0.277425	0.351474	0.789318	0.429926	0.900453	16	18599197	18630737	protein_coding	Cdc45
4	ENSMUSG00000000031	3.3947	-0.0826371	1.003	0.0823901	0.934337	NA	7	142129262	142133957	lncRNA	H19
5	ENSMUSG00000000037	14.5248	0.601152	0.483806	-1.24255	0.214034	0.801876	X	159865521	160041209	protein_coding	Scml2
6	ENSMUSG00000000049	6.28414	-0.069547	0.619163	0.112324	0.910566	NA	11	108234180	108305222	protein_coding	Apoh
7	ENSMUSG00000000056	1039.14	-0.00557699	0.0719147	0.0775501	0.938186	0.993944	11	121128079	121146682	protein_coding	Narf
8	ENSMUSG00000000058	707.602	-0.217383	0.109039	1.99363	0.0461925	0.520656	6	17281184	17289114	protein_coding	Cav2
9	ENSMUSG00000000078	948.758	-0.0916379	0.075917	1.20708	0.227402	0.81027	13	5911481	5920393	protein_coding	Klf6
10	ENSMUSG00000000085	806.315	0.00285393	0.0732671	-0.0389524	0.968928	0.995946	4	120262478	120387383	protein_coding	Scmh1
11	ENSMUSG00000000088	569.78	-0.139086	0.0895061	1.55392	0.120203	0.696023	9	57428557	57439709	protein_coding	Cox5a
12	ENSMUSG00000000093	12.6875	-0.39697	0.453799	0.874771	0.381699	0.887689	11	85723377	85732774	protein_coding	Tbx2
13	ENSMUSG00000000094	2.82869	1.12795	0.992443	-1.13654	0.255729	NA	11	85777248	85806923	protein_coding	Tbx4
14	ENSMUSG00000000103	0	NA	NA	NA	NA	NA	Y	2106015	2170409	protein_coding	Zfy2
15	ENSMUSG00000000120	18.98	0.303658	0.379478	-0.8002	0.423595	0.899932	11	95459644	95478561	protein_coding	Ngfr
16	ENSMUSG00000000125	24.9053	-0.123156	0.363805	0.338522	0.73497	0.96526	11	103664976	103708783	protein_coding	Wnt3
17	ENSMUSG00000000126	488.851	0.264451	0.0861142	-3.07093	0.00213393	0.119615	11	59197754	59224378	protein_coding	Wnt9a
18	ENSMUSG00000000127	292.676	-0.151055	0.107106	1.41034	0.158439	0.752191	17	64170057	64446491	protein_coding	Fer
19	ENSMUSG00000000131	1903.23	-0.0286056	0.0660928	0.432809	0.665153	0.955002	7	125700887	125799673	protein_coding	Xpo6
20	ENSMUSG00000000134	821.408	-0.00576169	0.0749737	0.0768494	0.938743	0.993944	X	7628799	7641441	protein_coding	Tfe3
21	ENSMUSG00000000142	514.701	0.172989	0.091343	-1.89384	0.0582468	0.565897	11	108811175	108841609	protein_coding	Axin2
22	ENSMUSG00000000148	418.793	0.1498	0.0970302	-1.54385	0.122626	0.700474	5	140690766	140705134	protein_coding	Brat1
23	ENSMUSG00000000149	1025.2	-0.0260201	0.0817399	0.318329	0.750236	0.966823	5	140744163	140816186	protein_coding	Gna12
24	ENSMUSG00000000154	11.4976	1.0507	0.500093	-2.10101	0.0356397	0.484443	7	143027473	143053071	protein_coding	Slc22a18
25	ENSMUSG00000000157	0.665421	1.39702	1.77266	-0.788095	0.430641	NA	16	96223488	96244819	protein_coding	Itgb2l
26	ENSMUSG00000000159	2.16586	0.635812	1.07318	-0.592457	0.553545	NA	16	96162868	96223321	protein_coding	Igsf5
27	ENSMUSG00000000167	33.2685	-0.138524	0.339746	0.407729	0.683473	0.960299	9	50528621	50536300	protein_coding	Pih1d2
28	ENSMUSG00000000168	1452.23	-0.0388694	0.0675895	0.575081	0.565237	0.935237	9	50545933	50571080	protein_coding	Dlat
29	ENSMUSG00000000171	1140.05	0.0576292	0.0721333	-0.798926	0.424333	0.899932	9	50507657	50515112	protein_coding	Sdhd
30	ENSMUSG00000000182	9.37053	0.32268	0.592409	-0.544692	0.585965	0.939993	6	127049865	127058371	protein_coding	Fgf23
31	ENSMUSG00000000183	0	NA	NA	NA	NA	NA	6	126992549	127005150	protein_coding	Fgf6
32	ENSMUSG00000000184	940.915	-0.00639841	0.092861	0.068903	0.945067	0.995337	6	127102125	127129156	protein_coding	Ccnd2
33	ENSMUSG00000000194	952.228	-0.0397548	0.0737173	0.539287	0.589689	0.940148	2	31042328	31108787	protein_coding	Gpr107
34	ENSMUSG00000000197	1930.14	-0.110986	0.0605002	1.83448	0.0665832	0.589709	14	123514046	123864556	protein_coding	Nalcn
35	ENSMUSG00000000202	199.854	-0.116826	0.175694	0.66494	0.506089	0.92038	11	114682043	114686771	protein_coding	Btbd17
36	ENSMUSG00000000204	0	NA	NA	NA	NA	NA	11	83066012	83081042	protein_coding	Slfn4
37	ENSMUSG00000000214	18.3065	-0.24504	1.20049	0.204116	0.838263	0.977599	7	142446489	142484865	protein_coding	Th
38	ENSMUSG00000000215	0	NA	NA	NA	NA	NA	7	142232393	142297118	protein_coding	Ins2
39	ENSMUSG00000000216	1.79658	18.4265	259.495	-0.0710092	0.94339	NA	7	121333702	121367698	protein_coding	Scnn1g
40	ENSMUSG00000000223	2820.73	0.188321	0.0715214	-2.63307	0.00846167	0.25526	X	133305300	133357322	protein_coding	Drp2
41	ENSMUSG00000000244	2.59671	-0.0729926	0.999436	0.0730338	0.941779	NA	7	142558783	142573381	protein_coding	Tspan32
42	ENSMUSG00000000247	831.71	-0.00339976	0.129325	0.0262884	0.979027	0.997181	2	38229293	38259745	protein_coding	Lhx2
43	ENSMUSG00000000248	0	NA	NA	NA	NA	NA	6	128911344	128961670	protein_coding	Clec2g
44	ENSMUSG00000000253	624.251	-0.0707761	0.0956318	0.740089	0.459246	0.912136	13	45660920	45707276	protein_coding	Gmpr
45	ENSMUSG00000000263	7.59065	1.27713	0.693964	-1.84034	0.0657188	NA	11	55405064	55499024	protein_coding	Glra1
46	ENSMUSG00000000266	512.217	0.100071	0.117133	-0.854336	0.392919	0.893501	X	139565348	139668464	protein_coding	Mid2
47	ENSMUSG00000000275	111.214	0.239178	0.182597	-1.30987	0.19024	0.780343	11	88890202	88911119	protein_coding	Trim25
48	ENSMUSG00000000276	1959.7	-0.0606054	0.0632184	0.958666	0.337727	0.86811	11	88926005	88957676	protein_coding	Dgke
49	ENSMUSG00000000278	264.207	0.129536	0.11978	-1.08145	0.279497	0.841348	11	88814846	88846291	protein_coding	Scpep1
50	ENSMUSG00000000282	751.421	-0.0539408	0.0821878	0.656312	0.511624	0.920808	11	74721746	74736551	protein_coding	Mnt
51	ENSMUSG00000000290	106.273	0.126981	0.20042	-0.633571	0.526361	0.926708	10	77366086	77401542	protein_coding	Itgb2
52	ENSMUSG00000000295	109.883	-0.0857157	0.178691	0.479685	0.631451	0.949897	10	31189379	31204200	protein_coding	Hddc2
53	ENSMUSG00000000296	235.507	-0.0609175	0.137873	0.441839	0.658606	0.954423	10	31208372	31321954	protein_coding	Tpd52l1
54	ENSMUSG00000000301	37.6891	0.0496702	0.282529	-0.175806	0.860446	0.9812	11	59861440	59937315	protein_coding	Pemt
55	ENSMUSG00000000303	76.8257	-0.541443	0.760754	0.71172	0.476638	0.916466	8	107329983	107396878	protein_coding	Cdh1
56	ENSMUSG00000000305	400.03	0.279718	0.169531	-1.64995	0.0989529	0.663508	2	179084224	179541166	protein_coding	Cdh4
57	ENSMUSG00000000308	3312.86	-0.175064	0.0889211	1.96876	0.0489803	0.53126	2	121188195	121194218	protein_coding	Ckmt1
58	ENSMUSG00000000317	29.5206	0.366228	0.315527	-1.16069	0.245768	0.819906	11	70114954	70120624	protein_coding	Bcl6b
59	ENSMUSG00000000318	14.5294	0.688209	0.553288	-1.24385	0.213553	0.801851	11	70047023	70061660	protein_coding	Clec10a
60	ENSMUSG00000000320	17.5954	-0.521898	0.381443	1.36822	0.171243	0.759923	11	70132283	70146179	protein_coding	Alox12
61	ENSMUSG00000000326	1354.45	-0.0239541	0.0621849	0.385208	0.700083	0.964169	16	18225636	18245602	protein_coding	Comt
62	ENSMUSG00000000339	746.708	-0.051725	0.0800148	0.646443	0.517993	0.922171	3	116282612	116301857	protein_coding	Rtca
63	ENSMUSG00000000340	304.796	0.243411	0.139061	-1.75039	0.0800518	0.627649	3	116306719	116343630	protein_coding	Dbt
64	ENSMUSG00000000346	2107.69	0.00741805	0.0685459	-0.10822	0.913821	0.991236	15	100513230	100518642	protein_coding	Dazap2
65	ENSMUSG00000000355	554.885	-0.0352569	0.0816758	0.431668	0.665983	0.95522	X	37689455	37702303	protein_coding	Mcts1
66	ENSMUSG00000000359	4.9448	-0.35461	0.755366	0.469454	0.638745	NA	2	152468871	152477118	protein_coding	Rem1
67	ENSMUSG00000000365	23.7903	0.07805	0.371461	-0.210116	0.833577	0.976414	14	56640038	56762489	protein_coding	Rnf17
68	ENSMUSG00000000374	2335.58	0.0233139	0.0745409	-0.312766	0.754458	0.968105	10	78022559	78080475	protein_coding	Trappc10
69	ENSMUSG00000000378	626.292	0.0517082	0.0859992	-0.601263	0.547665	0.92964	11	6496887	6546744	protein_coding	Ccm2
70	ENSMUSG00000000381	0	NA	NA	NA	NA	NA	11	6585482	6588637	protein_coding	Wap
71	ENSMUSG00000000384	545.074	-0.0448775	0.0934477	0.480241	0.631056	0.949897	11	6565598	6576067	protein_coding	Tbrg4
72	ENSMUSG00000000385	2.40426	3.58601	1.94068	-1.84781	0.0646296	NA	16	97365882	97412395	protein_coding	Tmprss2
73	ENSMUSG00000000386	6.44623	-1.5331	0.633225	2.4211	0.0154736	NA	16	97248235	97264107	protein_coding	Mx1
74	ENSMUSG00000000392	94.9194	0.296061	0.237039	-1.249	0.211665	0.799978	2	62331287	62404419	protein_coding	Fap
75	ENSMUSG00000000394	1.31318	0.669696	1.48753	-0.450208	0.652561	NA	2	62304874	62313994	protein_coding	Gcg
76	ENSMUSG00000000399	1432.28	-0.0758917	0.0831693	0.912496	0.361507	0.879219	6	126798684	126826099	protein_coding	Ndufa9
77	ENSMUSG00000000402	41.0559	0.49814	0.352172	-1.41448	0.157221	0.751096	X	165306003	165368716	protein_coding	Egfl6
78	ENSMUSG00000000409	19.0234	0.386868	0.38507	-1.00467	0.315056	0.857928	4	129442137	129467434	protein_coding	Lck
79	ENSMUSG00000000411	2.12196	-0.179556	1.14558	0.156738	0.875452	NA	4	129382807	129384815	protein_coding	Tssk3
80	ENSMUSG00000000416	2538.49	0.151254	0.0808912	-1.86984	0.0615058	0.573057	6	18366477	18514842	protein_coding	Cttnbp2
81	ENSMUSG00000000420	883.003	0.191194	0.0844791	-2.26322	0.0236223	0.409724	18	24338401	24419875	protein_coding	Galnt1
82	ENSMUSG00000000435	0	NA	NA	NA	NA	NA	10	107318769	107321995	protein_coding	Myf5
83	ENSMUSG00000000439	452.42	0.0655172	0.0988616	-0.662717	0.507512	0.920705	6	115578863	115599585	protein_coding	Mkrn2
84	ENSMUSG00000000440	159.045	-0.151147	0.233178	0.648205	0.516852	0.922104	6	115337912	115467360	protein_coding	Pparg
85	ENSMUSG00000000441	702.329	0.00710552	0.0809068	-0.0878236	0.930017	0.993013	6	115595028	115653596	protein_coding	Raf1
86	ENSMUSG00000000486	19.4471	0.178188	0.391405	-0.455253	0.648928	0.952907	7	126813619	126832302	protein_coding	Septin1
87	ENSMUSG00000000489	372.641	-0.383562	0.151122	2.5381	0.0111456	0.286226	15	79880075	79899178	protein_coding	Pdgfb
88	ENSMUSG00000000530	215.186	-0.142087	0.171445	0.828761	0.40724	0.896672	15	101026403	101043217	protein_coding	Acvrl1
89	ENSMUSG00000000531	562.106	0.162576	0.136292	-1.19286	0.232926	0.811918	15	101122069	101130637	protein_coding	Tamalin
90	ENSMUSG00000000532	2960.36	-0.104714	0.0671596	1.55918	0.118955	0.692503	15	101071948	101111565	protein_coding	Acvr1b
91	ENSMUSG00000000538	7178.68	-0.0637295	0.0573993	1.11028	0.266877	0.833435	11	60117540	60243731	protein_coding	Tom1l2
92	ENSMUSG00000000544	0	NA	NA	NA	NA	NA	1	165957807	165994079	protein_coding	Gpa33
93	ENSMUSG00000000552	1364.64	-0.0393763	0.1099	0.358293	0.720124	0.964829	15	103222322	103248520	protein_coding	Zfp385a
94	ENSMUSG00000000555	45.237	0.220812	0.26951	-0.81931	0.41261	0.898338	15	103252713	103275190	protein_coding	Itga5
95	ENSMUSG00000000560	2117.85	-0.0136423	0.113585	0.120107	0.904399	0.990686	5	71114940	71253192	protein_coding	Gabra2
96	ENSMUSG00000000561	495.46	0.0158163	0.0850005	-0.186073	0.852388	0.980368	3	105866685	105877353	protein_coding	Wdr77
97	ENSMUSG00000000562	7.72444	-0.155002	0.560708	0.276441	0.78221	NA	3	105778174	105816242	protein_coding	Adora3
98	ENSMUSG00000000563	3391	-0.120398	0.0683155	1.76238	0.0780049	0.624453	3	105850014	105867415	protein_coding	Atp5pb
99	ENSMUSG00000000567	395.403	-0.0744314	0.164407	0.452726	0.650746	0.953223	11	112673050	112678586	protein_coding	Sox9
100	ENSMUSG00000000568	2395.47	-0.0391541	0.0639048	0.612694	0.540079	0.927883	5	100103794	100126797	protein_coding	Hnrnpd
101	ENSMUSG00000000579	21.0146	0.214196	0.352543	-0.607573	0.543471	0.928418	17	6869070	6877173	protein_coding	Dynlt1c
102	ENSMUSG00000000581	367.331	-0.05077	0.129924	0.390766	0.69597	0.963577	11	17207579	17219176	protein_coding	C1d
103	ENSMUSG00000000594	1203.66	-0.12384	0.079213	1.56338	0.117963	0.691058	11	54988941	55003855	protein_coding	Gm2a
104	ENSMUSG00000000600	1043.6	0.00686001	0.0700135	-0.0979812	0.921947	0.99244	5	3853184	3895564	protein_coding	Krit1
105	ENSMUSG00000000605	3693.12	-0.0243785	0.0641603	0.379963	0.703973	0.964754	7	7285308	7303850	protein_coding	Clcn4
106	ENSMUSG00000000606	0	NA	NA	NA	NA	NA	14	51648277	51658178	protein_coding	Vmn2r88
107	ENSMUSG00000000617	0.153393	-15.0572	196.1	0.076783	0.938796	NA	11	50741512	50757035	protein_coding	Grm6
108	ENSMUSG00000000627	1129.91	0.0649484	0.094297	-0.688764	0.490972	0.916597	6	82888866	82916750	protein_coding	Sema4f
109	ENSMUSG00000000628	59.52	0.0208117	0.347991	-0.0598054	0.952311	0.995659	6	82702006	82751435	protein_coding	Hk2
110	ENSMUSG00000000631	4811.51	-0.0337152	0.0582206	0.579095	0.562525	0.934035	11	77654072	77756806	protein_coding	Myo18a
111	ENSMUSG00000000632	2042.72	-0.603853	0.134531	4.48859	7.17e-06	0.00200318	11	77821626	77869874	protein_coding	Sez6
112	ENSMUSG00000000673	6.44429	0.217421	0.76325	-0.284863	0.775749	NA	17	84138585	84155392	protein_coding	Haao
113	ENSMUSG00000000682	28.4849	0.296044	0.363048	-0.815439	0.414821	0.898454	4	133809759	133822393	protein_coding	Cd52
114	ENSMUSG00000000686	8.48925	-0.984362	0.743416	1.32411	0.185468	0.773264	11	77405947	77429433	protein_coding	Abhd15
115	ENSMUSG00000000690	0	NA	NA	NA	NA	NA	11	96183302	96192395	protein_coding	Hoxb6
116	ENSMUSG00000000693	78.4278	-0.215693	0.297421	0.72521	0.468323	0.915393	6	83011154	83029543	protein_coding	Loxl3
117	ENSMUSG00000000701	0	NA	NA	NA	NA	NA	12	105142603	105147404	protein_coding	Tcl1b5
118	ENSMUSG00000000706	1.55213	2.36927	1.64992	-1.43599	0.151005	NA	13	23641162	23650071	protein_coding	Btn1a1
119	ENSMUSG00000000708	344.658	0.150953	0.131927	-1.14422	0.252533	0.8229	17	53873889	53979748	protein_coding	Kat2b
120	ENSMUSG00000000711	2632.04	-0.105744	0.0590587	1.79049	0.0733754	0.609976	10	128513044	128532133	protein_coding	Rab5b
121	ENSMUSG00000000724	0.939123	-0.181851	1.4514	0.125294	0.900291	NA	11	77609441	77616109	protein_coding	Cryba1
122	ENSMUSG00000000730	1.09187	-0.565905	1.31548	0.430189	0.667058	NA	10	77877781	77899456	protein_coding	Dnmt3l
123	ENSMUSG00000000731	2.14031	-1.10612	1.01703	1.0876	0.276773	NA	10	77865856	77879444	protein_coding	Aire
124	ENSMUSG00000000732	73.9154	0.478507	0.208841	-2.29125	0.0219491	0.394258	10	77905136	77919747	protein_coding	Icosl
125	ENSMUSG00000000738	1014.01	-0.0102895	0.0915282	0.112419	0.910491	0.990686	8	123789681	123824499	protein_coding	Spg7
126	ENSMUSG00000000739	3.32202	-0.98427	1.02448	0.960755	0.336676	NA	8	123866931	123885054	protein_coding	Sult5a1
127	ENSMUSG00000000740	1847.87	-0.0199079	0.0746888	0.266545	0.78982	0.973962	8	123829089	123831983	protein_coding	Rpl13
128	ENSMUSG00000000743	1396.53	-0.0632648	0.081093	0.780151	0.435302	0.903954	8	123931003	123939502	protein_coding	Chmp1a
129	ENSMUSG00000000751	786.48	-0.0176911	0.079492	0.222552	0.823884	0.975807	11	75188992	75239150	protein_coding	Rpa1
130	ENSMUSG00000000753	186.145	0.452496	0.511831	-0.884073	0.376657	0.885123	11	75300595	75313527	protein_coding	Serpinf1
131	ENSMUSG00000000759	781.502	-0.0456745	0.0739992	0.61723	0.537083	0.927835	8	12664277	12722248	protein_coding	Tubgcp3
132	ENSMUSG00000000766	17.8414	0.694147	0.406112	-1.70925	0.0874052	0.645738	10	6708506	6988198	protein_coding	Oprm1
133	ENSMUSG00000000776	260.497	0.160116	0.115589	-1.38522	0.165986	0.758506	14	70676197	70680887	protein_coding	Polr3d
134	ENSMUSG00000000782	67.5077	0.207595	0.238057	-0.872038	0.383188	0.888106	11	52143198	52174158	protein_coding	Tcf7
135	ENSMUSG00000000787	5070.59	0.0225278	0.0658258	-0.342233	0.732176	0.96526	X	13147209	13160291	protein_coding	Ddx3x
136	ENSMUSG00000000791	7.62289	1.65607	0.695701	-2.38043	0.0172926	NA	8	71261093	71274068	protein_coding	Il12rb1
137	ENSMUSG00000000792	308.287	-0.384363	0.160526	2.39439	0.0166479	0.338221	8	71335533	71345401	protein_coding	Slc5a5
138	ENSMUSG00000000794	321.492	0.0446312	0.120808	-0.369439	0.711801	0.96478	3	89427471	89582439	protein_coding	Kcnn3
139	ENSMUSG00000000804	3529.92	-0.112104	0.0657606	1.70473	0.0882449	0.6468	11	84875268	85030987	protein_coding	Usp32
140	ENSMUSG00000000805	937.555	0.310461	0.146041	-2.12586	0.0335153	0.475707	11	84848612	84856870	protein_coding	Car4
141	ENSMUSG00000000811	89.0334	-0.0184155	0.231672	0.0794896	0.936643	0.993769	6	89620970	89652511	protein_coding	Txnrd3
142	ENSMUSG00000000817	1.69077	1.13098	1.20386	-0.939459	0.347495	NA	1	161608258	161616064	protein_coding	Fasl
143	ENSMUSG00000000823	1501.24	-0.0296978	0.0668758	0.444074	0.656989	0.954423	2	181223896	181234596	protein_coding	Zfp512b
144	ENSMUSG00000000826	7129.9	-0.0251512	0.0623435	0.40343	0.686632	0.960878	2	181162278	181196926	protein_coding	Dnajc5
145	ENSMUSG00000000827	830.665	0.0778004	0.080051	-0.971886	0.331107	0.864683	2	181138935	181159759	protein_coding	Tpd52l2
146	ENSMUSG00000000838	1279.2	-0.0380438	0.0703949	0.540434	0.588898	0.940042	X	67722147	67761569	protein_coding	Fmr1
147	ENSMUSG00000000861	1475.54	-0.238725	0.0782704	3.05001	0.00228837	0.123944	11	24028056	24124123	protein_coding	Bcl11a
148	ENSMUSG00000000869	176.879	-0.0466876	0.141211	0.330624	0.740929	0.965913	11	53493809	53509496	protein_coding	Il4
149	ENSMUSG00000000876	269.785	-0.083841	0.17711	0.473384	0.63594	0.949948	2	154427678	154445628	protein_coding	Pxmp4
150	ENSMUSG00000000881	3677.24	-0.0811372	0.0614562	1.32025	0.186753	0.774242	X	99811328	99862016	protein_coding	Dlg3
151	ENSMUSG00000000884	62.9871	0.109862	0.308156	-0.356513	0.721456	0.964829	16	18317463	18385429	protein_coding	Gnb1l
152	ENSMUSG00000000889	3.94216	-0.450415	1.05135	0.428417	0.668347	NA	2	27055245	27073212	protein_coding	Dbh
153	ENSMUSG00000000901	25.7872	0.0288009	0.390267	-0.073798	0.941171	0.994393	10	75759056	75772330	protein_coding	Mmp11
154	ENSMUSG00000000902	983.304	0.0596947	0.0675809	-0.883308	0.37707	0.885499	10	75732603	75757451	protein_coding	Smarcb1
155	ENSMUSG00000000903	2.57256	-0.405587	0.93027	0.435989	0.662845	NA	10	75778891	75785491	protein_coding	Vpreb3
156	ENSMUSG00000000915	1788.63	-0.138782	0.0772835	1.79575	0.0725342	0.60784	5	124111691	124143621	protein_coding	Hip1r
157	ENSMUSG00000000916	208.187	-0.183247	0.135894	1.34845	0.177513	0.765442	5	135398807	135405659	protein_coding	Nsun5
158	ENSMUSG00000000934	170.592	-0.0109446	0.154936	0.0706397	0.943684	0.9952	15	75528884	75550649	protein_coding	Top1mt
159	ENSMUSG00000000938	0	NA	NA	NA	NA	NA	6	52208177	52217834	protein_coding	Hoxa10
160	ENSMUSG00000000942	0	NA	NA	NA	NA	NA	6	52166651	52168733	protein_coding	Hoxa4
161	ENSMUSG00000000948	245.723	-0.0101142	0.183031	0.0552593	0.955932	0.995659	7	59623897	59654812	protein_coding	Gm38393
162	ENSMUSG00000000957	139.901	-0.373162	0.214751	1.73765	0.0822732	0.634921	14	54669069	54682821	protein_coding	Mmp14
163	ENSMUSG00000000958	37.9487	0.517067	0.341202	-1.51543	0.129663	0.711266	14	54606899	54655237	protein_coding	Slc7a7
164	ENSMUSG00000000959	715.503	-0.0357547	0.0865984	0.412879	0.679695	0.95962	14	54598291	54607130	protein_coding	Oxa1l
165	ENSMUSG00000000976	432.037	-0.049108	0.0903803	0.543348	0.58689	0.940042	11	83644522	83674580	protein_coding	Heatr6
166	ENSMUSG00000000982	3.47471	0.0407072	0.827164	-0.0492129	0.96075	NA	11	83538670	83540181	protein_coding	Ccl3
167	ENSMUSG00000000983	9.78393	-0.551198	0.555777	0.99176	0.321314	0.860415	11	83599841	83602174	protein_coding	Wfdc18
168	ENSMUSG00000001014	0	NA	NA	NA	NA	NA	9	20940669	20941891	protein_coding	Icam4
169	ENSMUSG00000001016	1326.13	0.035457	0.0723583	-0.49002	0.62412	0.948617	3	90383433	90395686	protein_coding	Ilf2
170	ENSMUSG00000001017	1994.44	-0.0294628	0.0642978	0.458224	0.646792	0.952656	3	90406263	90416805	protein_coding	Chtop
171	ENSMUSG00000001018	661.96	0.0439697	0.0846252	-0.519582	0.603355	0.944035	3	90395333	90398340	protein_coding	Snapin
172	ENSMUSG00000001020	0.702883	-0.00316407	1.50478	0.00210268	0.998322	NA	3	90511078	90513352	protein_coding	S100a4
173	ENSMUSG00000001021	5.61267	-0.628693	0.72882	0.862617	0.388348	NA	3	90491966	90510009	protein_coding	S100a3
174	ENSMUSG00000001023	0	NA	NA	NA	NA	NA	3	90515830	90519087	protein_coding	S100a5
175	ENSMUSG00000001025	183.993	-0.129336	0.276363	0.467991	0.639791	0.950508	3	90520189	90531488	protein_coding	S100a6
176	ENSMUSG00000001027	0.578352	-0.80176	2.15117	0.372708	0.709366	NA	11	106209418	106244114	protein_coding	Scn4a
177	ENSMUSG00000001029	20.7868	-0.309423	0.415515	0.744675	0.456468	0.911416	11	106268482	106278901	protein_coding	Icam2
178	ENSMUSG00000001034	381.592	0.0520654	0.105061	-0.495572	0.620196	0.947712	11	61379638	61385232	protein_coding	Mapk7
179	ENSMUSG00000001036	1940.74	-0.0747751	0.0700719	1.06712	0.285918	0.843971	11	61408075	61470513	protein_coding	Epn2
180	ENSMUSG00000001039	204.767	-0.0936603	0.159718	0.586409	0.557601	0.932273	11	61395970	61403757	protein_coding	B9d1
181	ENSMUSG00000001052	1347.28	-0.0581759	0.0736086	0.790341	0.429329	0.900255	3	129776408	129855202	protein_coding	Sec24b
182	ENSMUSG00000001053	110.359	-0.496032	0.266646	1.86026	0.0628485	0.57769	11	51533890	51541669	protein_coding	N4bp3
183	ENSMUSG00000001054	693.827	-0.0937168	0.0773048	1.2123	0.225397	0.809422	11	51514498	51526723	protein_coding	Rmnd5b
184	ENSMUSG00000001056	307.376	-0.0469287	0.1482	0.316658	0.751503	0.966823	11	51510562	51514541	protein_coding	Nhp2
185	ENSMUSG00000001062	1077.08	0.149599	0.0701729	-2.13186	0.0330183	0.472451	8	123969095	123981087	protein_coding	Vps9d1
186	ENSMUSG00000001065	257.599	0.218454	0.116125	-1.88121	0.0599439	0.568792	8	123980934	123996484	protein_coding	Zfp276
187	ENSMUSG00000001076	0.117544	14.8675	283.956	-0.0523583	0.958243	NA	15	98981967	98985698	protein_coding	C1ql4
188	ENSMUSG00000001082	283.61	-0.0688489	0.121291	0.567635	0.570283	0.936696	5	34790986	34794556	protein_coding	Mfsd10
189	ENSMUSG00000001089	2810.88	0.122237	0.107754	-1.13441	0.256621	0.828366	4	136197072	136282091	protein_coding	Luzp1
190	ENSMUSG00000001095	0.117544	14.8675	283.956	-0.0523583	0.958243	NA	11	78287913	78313043	protein_coding	Slc13a2
191	ENSMUSG00000001098	362.618	0.135719	0.130573	-1.03941	0.298612	0.850605	5	114501628	114518569	protein_coding	Kctd10
192	ENSMUSG00000001100	1569.5	0.0473405	0.0699859	-0.676429	0.498768	0.918285	11	78403019	78413562	protein_coding	Poldip2
193	ENSMUSG00000001103	22.9209	-1.33726	0.477434	2.80093	0.00509552	0.185892	11	78394273	78395907	protein_coding	Sebox
194	ENSMUSG00000001105	660.239	-0.00697152	0.0774857	0.0899716	0.92831	0.993013	11	78427187	78432563	protein_coding	Ift20
195	ENSMUSG00000001119	853.659	-0.96741	0.515431	1.87689	0.0605327	0.569849	10	76544626	76562002	protein_coding	Col6a1
196	ENSMUSG00000001120	779.58	-0.165164	0.0739985	2.23199	0.0256157	0.422826	10	76597691	76797721	protein_coding	Pcbp3
197	ENSMUSG00000001123	93.8456	-0.047008	0.206981	0.227112	0.820337	0.97554	11	78853800	78875772	protein_coding	Lgals9
198	ENSMUSG00000001127	2192.91	0.0271268	0.0651908	-0.416114	0.677327	0.959374	X	20664053	20726758	protein_coding	Araf
199	ENSMUSG00000001128	231.869	0.0177454	0.123876	-0.143251	0.886092	0.985307	X	20791693	20797794	protein_coding	Cfp
200	ENSMUSG00000001131	16.0548	0.25221	0.445154	-0.566569	0.571007	0.937191	X	20736405	20740974	protein_coding	Timp1
201	ENSMUSG00000001134	50.8702	0.00231765	0.245073	-0.00945697	0.992455	0.999189	X	20807961	20828256	protein_coding	Uxt
202	ENSMUSG00000001138	507.519	0.0172326	0.0883699	-0.195005	0.845389	0.979375	1	36550948	36567318	protein_coding	Cnnm3
203	ENSMUSG00000001143	516.849	-0.0477426	0.0961783	0.496397	0.619614	0.947712	1	36458952	36484352	protein_coding	Lman2l
204	ENSMUSG00000001150	1218.94	-0.123913	0.0631478	1.96227	0.0497309	0.532183	10	76304761	76351691	protein_coding	Mcm3ap
205	ENSMUSG00000001151	763.017	0.0120327	0.0791903	-0.151947	0.879229	0.984535	10	76187097	76278620	protein_coding	Pcnt
206	ENSMUSG00000001155	0.803735	-0.605872	1.40658	0.430741	0.666657	NA	10	76411482	76426172	protein_coding	Ftcd
207	ENSMUSG00000001156	505.921	0.0209033	0.08942	-0.233765	0.815167	0.97554	6	86624024	86646143	protein_coding	Mxd1
208	ENSMUSG00000001157	535.951	0.104967	0.0845737	-1.24113	0.214559	0.802067	6	86668750	86710365	protein_coding	Gmcl1
209	ENSMUSG00000001158	422.903	0.0306252	0.10284	-0.297795	0.76586	0.969744	6	86652133	86661504	protein_coding	Snrnp27
210	ENSMUSG00000001166	22.2644	0.139775	0.418012	-0.334381	0.738092	0.965778	5	120938259	120950579	protein_coding	Oas1c
211	ENSMUSG00000001168	0	NA	NA	NA	NA	NA	5	120999484	121011569	protein_coding	Oas1h
212	ENSMUSG00000001173	1423.14	-0.00288883	0.0888928	0.0324979	0.974075	0.996483	X	47001264	47054745	protein_coding	Ocrl
213	ENSMUSG00000001175	55840.4	0.0245204	0.0633948	-0.386789	0.698912	0.964109	12	100165694	100176073	protein_coding	Calm1
214	ENSMUSG00000001211	6048.09	0.0462227	0.0629847	-0.733872	0.463027	0.912666	10	78105012	78188323	protein_coding	Agpat3
215	ENSMUSG00000001225	1.82619	0.139765	1.14463	-0.122105	0.902816	NA	12	31440870	31523916	protein_coding	Slc26a3
216	ENSMUSG00000001227	1477.41	-0.18672	0.0993991	1.87849	0.0603142	0.569012	17	56430085	56447343	protein_coding	Sema6b
217	ENSMUSG00000001228	14.6744	-0.68964	0.421529	1.63604	0.101831	0.671095	17	56610321	56630486	protein_coding	Uhrf1
218	ENSMUSG00000001229	1588.26	-0.00784797	0.0757826	0.103559	0.917519	0.992125	17	56493807	56525905	protein_coding	Dpp9
219	ENSMUSG00000001240	197.074	-0.0916879	0.180587	0.50772	0.611649	0.945809	11	101136854	101150372	protein_coding	Ramp2
220	ENSMUSG00000001247	34.2423	0.171788	0.355703	-0.482954	0.629128	0.949655	7	30657195	30672889	protein_coding	Lsr
221	ENSMUSG00000001248	1851.68	0.0382002	0.0695325	-0.549386	0.58274	0.938048	7	30829552	30855321	protein_coding	Gramd1a
222	ENSMUSG00000001249	35.5346	0.07987	0.309113	-0.258385	0.79611	0.974199	7	30798150	30814715	protein_coding	Hpn
223	ENSMUSG00000001260	333.37	0.366816	0.122741	-2.98854	0.0028031	0.138252	5	70908390	70999960	protein_coding	Gabrg1
224	ENSMUSG00000001270	19495.1	0.02329	0.0831172	-0.280207	0.779318	0.972852	12	111635795	111638772	protein_coding	Ckb
225	ENSMUSG00000001280	521.582	-0.00353871	0.105152	0.0336532	0.973154	0.99645	15	102314578	102344839	protein_coding	Sp1
226	ENSMUSG00000001281	8.07993	0.163206	0.632763	-0.257926	0.796464	0.974199	15	102124430	102140379	protein_coding	Itgb7
227	ENSMUSG00000001285	380.134	-0.0156063	0.0943855	0.165346	0.868671	0.982395	15	102240144	102246574	protein_coding	Myg1
228	ENSMUSG00000001288	188.852	0.191434	0.138494	-1.38226	0.166892	0.758661	15	102143373	102165952	protein_coding	Rarg
229	ENSMUSG00000001289	1722.88	-0.0176206	0.0746535	0.236032	0.813408	0.975455	15	102234551	102240308	protein_coding	Pfdn5
230	ENSMUSG00000001300	884.55	-0.0599954	0.0906842	0.661586	0.508236	0.920808	8	8667434	8711242	protein_coding	Efnb2
231	ENSMUSG00000001305	156.986	-0.119895	0.146836	0.816526	0.414199	0.898454	1	186453175	186481555	protein_coding	Rrp15
232	ENSMUSG00000001313	1263.91	0.163659	0.111906	-1.46246	0.143615	0.729308	11	101355825	101362679	protein_coding	Rnd2
233	ENSMUSG00000001323	967.238	-0.110151	0.0787054	1.39954	0.161652	0.752841	11	74797185	74816774	protein_coding	Srr
234	ENSMUSG00000001333	16.7579	0.462096	0.432783	-1.06773	0.285642	0.843971	4	129181410	129202352	protein_coding	Sync
235	ENSMUSG00000001334	2004.11	0.120548	0.0884131	-1.36347	0.172735	0.761244	4	129030477	129038386	protein_coding	Fndc5
236	ENSMUSG00000001348	2.01968	-1.82818	1.19288	1.53258	0.12538	NA	9	22038023	22047007	protein_coding	Acp5
237	ENSMUSG00000001349	19.5393	0.964417	0.635404	-1.5178	0.129065	0.71038	9	22010512	22020926	protein_coding	Cnn1
238	ENSMUSG00000001366	1519.02	0.00943545	0.077381	-0.121935	0.90295	0.990396	9	77988781	78016347	protein_coding	Fbxo9
239	ENSMUSG00000001376	1437.79	0.00689714	0.0713444	-0.0966738	0.922985	0.99244	6	3498382	3603531	protein_coding	Vps50
240	ENSMUSG00000001380	1312.06	-0.111813	0.0634609	1.76193	0.0780815	0.624453	18	36899581	36916258	protein_coding	Hars1
241	ENSMUSG00000001383	2571.58	-0.0560461	0.0585767	0.956799	0.338669	0.868669	18	36926929	36932719	protein_coding	Zmat2
242	ENSMUSG00000001403	0.645301	1.36962	1.77189	-0.772973	0.439538	NA	2	164611818	164620742	protein_coding	Ube2c
243	ENSMUSG00000001415	1939.56	0.040824	0.060478	-0.675021	0.499662	0.918596	3	88243567	88269645	protein_coding	Smg5
244	ENSMUSG00000001416	1415.57	-0.0413213	0.0648024	0.637652	0.5237	0.925253	3	88204423	88229074	protein_coding	Cct3
245	ENSMUSG00000001418	578.557	0.0625976	0.0883017	-0.708906	0.478383	0.916466	3	88232330	88238620	protein_coding	Glmp
246	ENSMUSG00000001419	5031.02	-0.140367	0.0622475	2.25498	0.0241348	0.413377	3	88049679	88079393	protein_coding	Mef2d
247	ENSMUSG00000001420	12.2119	0.22669	0.459694	-0.493132	0.621919	0.948453	3	88235962	88243455	protein_coding	Tmem79
248	ENSMUSG00000001424	1367.51	-0.0591311	0.0655599	0.90194	0.367089	0.880903	6	28475138	28935161	protein_coding	Snd1
249	ENSMUSG00000001435	100.969	-0.360893	0.21831	1.65312	0.0983064	0.662881	10	76888012	77002382	protein_coding	Col18a1
250	ENSMUSG00000001436	318.907	0.0644127	0.118339	-0.544306	0.586231	0.939993	10	76868075	76896836	protein_coding	Slc19a1
251	ENSMUSG00000001440	2876.05	-0.0613143	0.0617122	0.993553	0.320441	0.860415	11	97050540	97078707	protein_coding	Kpnb1
252	ENSMUSG00000001441	2416.78	-0.00880957	0.0663113	0.132852	0.894311	0.987846	11	97096668	97171464	protein_coding	Npepps
253	ENSMUSG00000001444	2.29858	1.30375	1.28595	-1.01385	0.310657	NA	11	96988897	97006157	protein_coding	Tbx21
254	ENSMUSG00000001445	532.506	0.00968614	0.0827972	-0.116986	0.906871	0.990686	11	96932386	96940039	protein_coding	Mrpl10
255	ENSMUSG00000001467	1021.21	0.143467	0.0697228	-2.05767	0.0396214	0.497921	5	4131145	4154746	protein_coding	Cyp51
256	ENSMUSG00000001472	13999.3	0.0158685	0.0655858	-0.24195	0.808819	0.975169	8	124100492	124130574	protein_coding	Tcf25
257	ENSMUSG00000001473	94.0712	0.112436	0.18432	-0.610003	0.54186	0.927883	18	67523787	67535819	protein_coding	Tubb6
258	ENSMUSG00000001482	869.697	0.0297152	0.0709349	-0.418908	0.675284	0.958512	8	124150266	124190009	protein_coding	Def8
259	ENSMUSG00000001493	6.44159	-0.641563	0.664163	0.965972	0.334058	NA	11	101768336	101785200	protein_coding	Meox1
260	ENSMUSG00000001494	0.508947	0.943683	1.81605	-0.519634	0.603319	NA	11	101853284	101857841	protein_coding	Sost
261	ENSMUSG00000001496	0.566688	1.16724	2.54802	-0.458097	0.646883	NA	12	56578743	56583693	protein_coding	Nkx2-1
262	ENSMUSG00000001497	0.240934	15.7774	277.059	-0.0569462	0.954588	NA	12	56738552	56759607	protein_coding	Pax9
263	ENSMUSG00000001504	0.270936	-0.633014	2.14231	0.295483	0.767625	NA	13	72776939	72782317	protein_coding	Irx2
264	ENSMUSG00000001506	161.079	-0.352061	0.536455	0.656273	0.511648	0.920808	11	94827050	94843868	protein_coding	Col1a1
265	ENSMUSG00000001507	454.997	-0.0615047	0.100597	0.611396	0.540937	0.927883	11	94935300	94967627	protein_coding	Itga3
266	ENSMUSG00000001508	11.009	-0.443807	0.482063	0.920641	0.357238	0.878452	11	94853617	94867153	protein_coding	Sgca
267	ENSMUSG00000001510	0.573185	-2.18496	1.81957	1.20081	0.229825	NA	11	95010945	95016122	protein_coding	Dlx3
268	ENSMUSG00000001517	20.382	-0.54791	0.358059	1.53022	0.125962	0.706123	6	128339930	128353109	protein_coding	Foxm1
269	ENSMUSG00000001518	380.548	-0.0071101	0.100999	0.0703979	0.943877	0.995295	6	128386407	128401894	protein_coding	Itfg2
270	ENSMUSG00000001520	163.421	-0.095403	0.169278	0.563589	0.573034	0.937297	6	128376259	128393390	protein_coding	Nrip2
271	ENSMUSG00000001521	343.099	0.113198	0.0989523	-1.14396	0.252639	0.8229	6	128298124	128332814	protein_coding	Tulp3
272	ENSMUSG00000001524	221.866	-0.151613	0.155839	0.972882	0.330612	0.864683	17	35978622	35984631	protein_coding	Gtf2h4
273	ENSMUSG00000001525	7341.3	-0.176352	0.072153	2.44413	0.0145201	0.316346	17	36144813	36149198	protein_coding	Tubb5
274	ENSMUSG00000001542	659.157	0.0381816	0.137032	-0.278633	0.780526	0.972852	13	75854876	75920483	protein_coding	Ell2
275	ENSMUSG00000001552	604.303	-0.281699	0.281817	0.999582	0.317513	0.859488	11	100259784	100288589	protein_coding	Jup
276	ENSMUSG00000001555	132.857	0.0530282	0.210512	-0.251901	0.801117	0.974199	11	100306523	100315650	protein_coding	Fkbp10
277	ENSMUSG00000001558	12.7277	0.494793	0.47206	-1.04816	0.294566	0.84681	11	100332743	100347848	protein_coding	Klhl10
278	ENSMUSG00000001566	0	NA	NA	NA	NA	NA	5	29678032	29683468	protein_coding	Mnx1
279	ENSMUSG00000001569	459.076	0.0331989	0.0877231	-0.378451	0.705096	0.964754	5	29639662	29662841	protein_coding	Nom1
280	ENSMUSG00000001576	2467.1	0.038807	0.0616531	-0.629441	0.529061	0.927511	17	26780463	26875908	protein_coding	Ergic1
281	ENSMUSG00000001583	2.03913	-1.62069	1.11369	1.45524	0.145604	NA	11	69741831	69749556	protein_coding	Tnk1
282	ENSMUSG00000001588	1.70624	-1.01656	1.13961	0.892027	0.372379	NA	11	69772393	69786365	protein_coding	Acap1
283	ENSMUSG00000001604	8.35533	-0.380803	1.01486	0.375227	0.707492	0.96478	4	135975040	136002209	protein_coding	Tcea3
284	ENSMUSG00000001622	0.139277	14.876	283.889	-0.0524008	0.958209	NA	5	88073438	88080524	protein_coding	Csn3
285	ENSMUSG00000001627	480.663	0.188393	0.116015	-1.62386	0.104405	0.675022	12	40251566	40298503	protein_coding	Ifrd1
286	ENSMUSG00000001630	629.406	0.0388186	0.079879	-0.485967	0.626991	0.949217	6	146626493	146680310	protein_coding	Stk38l
287	ENSMUSG00000001632	640.336	0.173968	0.0904159	-1.92408	0.0543443	0.552691	6	113284098	113301821	protein_coding	Brpf1
288	ENSMUSG00000001642	636.849	0.122769	0.090362	-1.35863	0.174263	0.763335	6	34279369	34294413	protein_coding	Akr1b1
289	ENSMUSG00000001655	0	NA	NA	NA	NA	NA	15	102829538	102837249	protein_coding	Hoxc13
290	ENSMUSG00000001656	0	NA	NA	NA	NA	NA	15	102862862	102866143	protein_coding	Hoxc11
291	ENSMUSG00000001657	0	NA	NA	NA	NA	NA	15	102899039	102902543	protein_coding	Hoxc8
292	ENSMUSG00000001661	0	NA	NA	NA	NA	NA	15	102906689	102920313	protein_coding	Hoxc6
293	ENSMUSG00000001663	220.278	-0.113667	0.126239	0.900408	0.367903	0.881126	10	75619647	75634418	protein_coding	Gstt1
294	ENSMUSG00000001665	34.2523	0.222812	0.300215	-0.742173	0.457982	0.91212	10	75609949	75617248	protein_coding	Gstt3
295	ENSMUSG00000001666	112.771	-0.0233779	0.189205	0.123559	0.901665	0.990031	10	75607064	75609248	protein_coding	Ddt
296	ENSMUSG00000001670	0	NA	NA	NA	NA	NA	8	110717069	110726435	protein_coding	Tat
297	ENSMUSG00000001672	5.57814	0.208756	0.762342	-0.273835	0.784212	NA	8	110674546	110688835	protein_coding	Marveld3
298	ENSMUSG00000001674	282.244	0.0488036	0.127517	-0.382721	0.701927	0.964668	1	121481564	121495718	protein_coding	Ddx18
299	ENSMUSG00000001687	2495.23	0.0327434	0.0658372	-0.497339	0.61895	0.947712	5	148441445	148489599	protein_coding	Ubl3
300	ENSMUSG00000001700	248.795	0.0990943	0.154696	-0.640574	0.521799	0.923692	18	56533409	56636864	protein_coding	Gramd2b
301	ENSMUSG00000001707	248.409	0.0386311	0.118881	-0.324955	0.745215	0.966213	13	38828183	38843034	protein_coding	Eef1e1
302	ENSMUSG00000001729	3148.26	0.00499523	0.0621221	-0.0804099	0.935911	0.993322	12	112620255	112641318	protein_coding	Akt1
303	ENSMUSG00000001739	2.94739	0.245631	0.883802	-0.277925	0.78107	NA	5	136995470	137004712	protein_coding	Cldn15
304	ENSMUSG00000001741	29.779	0.438016	0.360947	-1.21352	0.224931	0.809155	7	83292033	83394934	protein_coding	Il16
305	ENSMUSG00000001750	196.436	0.0921369	0.153816	-0.599007	0.549168	0.930732	19	3946050	3957133	protein_coding	Tcirg1
306	ENSMUSG00000001751	158.639	0.314199	0.159146	-1.97428	0.0483501	0.528618	11	100960838	100968498	protein_coding	Naglu
307	ENSMUSG00000001755	371.189	0.00855148	0.108725	-0.0786523	0.937309	0.993944	11	100973391	100977445	protein_coding	Coasy
308	ENSMUSG00000001761	230.705	0.1252	0.163855	-0.76409	0.444814	0.909166	6	29735502	29761364	protein_coding	Smo
309	ENSMUSG00000001763	366.148	0.203655	0.10429	-1.95278	0.0508457	0.538709	6	29694221	29718558	protein_coding	Tspan33
310	ENSMUSG00000001767	285.059	0.132051	0.148296	-0.890452	0.373223	0.883615	2	145759399	145776934	protein_coding	Crnkl1
311	ENSMUSG00000001768	510.947	0.194904	0.101107	-1.92771	0.0538917	0.550646	2	145517135	145729536	protein_coding	Rin2
312	ENSMUSG00000001773	69.8986	-0.176503	0.301322	0.585764	0.558034	0.932275	7	86368185	86425151	protein_coding	Folh1
313	ENSMUSG00000001774	999.46	-0.147721	0.0706409	2.09115	0.0365143	0.48467	9	18203421	18228738	protein_coding	Chordc1
314	ENSMUSG00000001783	1649.38	-0.00402234	0.0648491	0.0620261	0.950542	0.995659	10	85774501	85793687	protein_coding	Rtcb
315	ENSMUSG00000001785	304.109	-0.0118219	0.104964	0.112628	0.910326	0.990686	10	85665358	85724960	protein_coding	Pwp1
316	ENSMUSG00000001786	762.695	-0.0737474	0.0882217	0.835932	0.403193	0.895885	10	85857836	85887737	protein_coding	Fbxo7
317	ENSMUSG00000001794	1844.9	0.0523596	0.066886	-0.782818	0.433734	0.902722	7	29886361	29898236	protein_coding	Capns1
318	ENSMUSG00000001802	1540.49	0.0146337	0.076547	-0.191172	0.848391	0.979996	7	34899452	34914923	protein_coding	Lrp3
319	ENSMUSG00000001804	0	NA	NA	NA	NA	NA	18	20569232	20604878	protein_coding	Dsg4
320	ENSMUSG00000001815	0	NA	NA	NA	NA	NA	2	74483335	74489901	protein_coding	Evx2
321	ENSMUSG00000001819	0	NA	NA	NA	NA	NA	2	74498654	74501943	protein_coding	Hoxd13
322	ENSMUSG00000001823	0	NA	NA	NA	NA	NA	2	74505357	74508049	protein_coding	Hoxd12
323	ENSMUSG00000001827	7.0903	-0.49642	0.724099	0.68557	0.492984	NA	7	101507538	101519995	protein_coding	Folr1
324	ENSMUSG00000001829	986.119	-0.0134379	0.0739612	0.181689	0.855827	0.980503	7	101312840	101444713	protein_coding	Clpb
325	ENSMUSG00000001833	6600.62	0.0149937	0.0933207	-0.160668	0.872355	0.982909	9	25163735	25219867	protein_coding	Septin7
326	ENSMUSG00000001844	391.979	0.0728624	0.102121	-0.713489	0.475543	0.916266	5	143302244	143315011	protein_coding	Zdhhc4
327	ENSMUSG00000001847	3588.11	-0.0347673	0.0568901	0.611132	0.541112	0.927883	5	143489389	143513791	protein_coding	Rac1
328	ENSMUSG00000001855	860.665	-0.0942496	0.0794189	1.18674	0.23533	0.811918	2	31864448	31943987	protein_coding	Nup214
329	ENSMUSG00000001864	85.9841	0.17827	0.194655	-0.915824	0.359759	0.879219	2	31840151	31863454	protein_coding	Aif1l
330	ENSMUSG00000001865	1.20017	-1.6497	3.92736	0.420054	0.674446	NA	3	20269784	20296345	protein_coding	Cpa3
331	ENSMUSG00000001870	213.834	-0.175528	0.17678	0.992917	0.32075	0.860415	17	75312563	75699507	protein_coding	Ltbp1
332	ENSMUSG00000001891	1138.55	0.028626	0.0735676	-0.389111	0.697194	0.964109	11	21271138	21321201	protein_coding	Ugp2
333	ENSMUSG00000001901	80.4085	-0.0514681	0.197927	0.260036	0.794836	0.974199	11	105898950	105925375	protein_coding	Kcnh6
334	ENSMUSG00000001909	1392.45	-0.0176798	0.0627042	0.281956	0.777978	0.972852	8	85412936	85426437	protein_coding	Trmt1
335	ENSMUSG00000001910	2816.51	-0.0233316	0.0590768	0.394936	0.69289	0.962578	8	85397108	85414531	protein_coding	Nacc1
336	ENSMUSG00000001911	4810.96	-0.238224	0.0692834	3.43839	0.000585176	0.0552538	8	85426505	85526973	protein_coding	Nfix
337	ENSMUSG00000001918	49.373	0.472246	0.313768	-1.50508	0.132304	0.716823	7	16515265	16532199	protein_coding	Slc1a5
338	ENSMUSG00000001924	6241.84	-0.0445048	0.0628564	0.708039	0.478921	0.916466	X	20524565	20549418	protein_coding	Uba1
339	ENSMUSG00000001930	550.554	0.197083	0.464267	-0.424504	0.671199	0.957125	6	125523737	125663642	protein_coding	Vwf
340	ENSMUSG00000001942	629.215	0.0401252	0.0787084	-0.509796	0.610195	0.945539	9	37466994	37560951	protein_coding	Siae
341	ENSMUSG00000001943	515.913	0.106061	0.0959116	-1.10582	0.268804	0.834524	9	37450551	37455501	protein_coding	Vsig2
342	ENSMUSG00000001946	289.694	0.0366806	0.107932	-0.339848	0.733971	0.96526	9	37439374	37449615	protein_coding	Esam
343	ENSMUSG00000001948	30.9112	0.0940346	0.337822	-0.278355	0.78074	0.972852	9	37514586	37525018	protein_coding	Spa17
344	ENSMUSG00000001962	354.818	0.00812157	0.0971449	-0.0836027	0.933372	0.993096	X	73356639	73363755	protein_coding	Fam50a
345	ENSMUSG00000001964	438.686	-0.00952539	0.0933612	0.102027	0.918735	0.992228	X	73298293	73305154	protein_coding	Emd
346	ENSMUSG00000001983	135.049	-0.100736	0.156132	0.645201	0.518797	0.922171	11	105956887	105964438	protein_coding	Taco1
347	ENSMUSG00000001985	1582.61	-0.466772	0.471726	0.989498	0.32242	0.861289	4	125384493	125607966	protein_coding	Grik3
348	ENSMUSG00000001986	4949.49	-0.182888	0.0558828	3.2727	0.00106525	0.0786995	X	40489731	40767478	protein_coding	Gria3
349	ENSMUSG00000001988	144.434	-0.320616	0.212756	1.50696	0.131821	0.716391	7	16189646	16211653	protein_coding	Npas1
350	ENSMUSG00000001995	1264.76	-0.0612361	0.0807383	0.758451	0.448181	0.909441	8	126144802	126296547	protein_coding	Sipa1l2
351	ENSMUSG00000001998	296.333	-0.0205724	0.116374	0.176778	0.859683	0.981051	2	126850637	126909829	protein_coding	Ap4e1
352	ENSMUSG00000001999	272.035	0.145929	0.162587	-0.897546	0.369428	0.881183	2	126912585	126939004	protein_coding	Blvra
353	ENSMUSG00000002006	1901.75	-0.0781351	0.0833307	0.93765	0.348424	0.873235	X	72836965	72868575	protein_coding	Pdzd4
354	ENSMUSG00000002007	140.68	0.202887	0.162392	-1.24937	0.211531	0.799978	X	72818011	72822531	protein_coding	Srpk3
355	ENSMUSG00000002010	2340.1	-0.0577668	0.0632503	0.913305	0.361082	0.879219	X	72822569	72830503	protein_coding	Idh3g
356	ENSMUSG00000002012	836.891	0.0525385	0.0787179	-0.667427	0.504499	0.919738	X	72699600	72703723	protein_coding	Pnck
357	ENSMUSG00000002014	533.864	-0.0312793	0.0828257	0.377652	0.705689	0.964754	X	72830634	72834436	protein_coding	Ssr4
358	ENSMUSG00000002015	789.511	-0.0264943	0.0812815	0.325957	0.744457	0.966213	X	72729784	72759781	protein_coding	Bcap31
359	ENSMUSG00000002017	610.06	-0.0663945	0.0949133	0.699528	0.484222	0.916489	17	75844081	75858941	protein_coding	Fam98a
360	ENSMUSG00000002020	36.023	0.310963	0.524397	-0.592992	0.553186	0.93088	12	84829986	84923306	protein_coding	Ltbp2
361	ENSMUSG00000002028	4277.87	-0.00461912	0.0790359	0.0584434	0.953395	0.995659	9	44714652	44792594	protein_coding	Kmt2a
362	ENSMUSG00000002031	574.401	-0.118163	0.0857001	1.37879	0.167958	0.759101	9	44679205	44704744	protein_coding	Ift46
363	ENSMUSG00000002032	1574.92	0.0706836	0.0873621	-0.809088	0.418464	0.899865	9	44705066	44710604	protein_coding	Tmem25
364	ENSMUSG00000002033	0.501487	0.945927	1.81809	-0.520286	0.602864	NA	9	44880870	44891729	protein_coding	Cd3g
365	ENSMUSG00000002043	64.5456	-0.0565259	0.239236	0.236276	0.813218	0.975455	7	19242320	19250070	protein_coding	Trappc6a
366	ENSMUSG00000002052	3784.2	0.0212532	0.0636187	-0.334071	0.738326	0.965778	11	78097572	78136813	protein_coding	Supt6
367	ENSMUSG00000002055	666.251	0.148111	0.107326	-1.38	0.167585	0.758926	11	78192355	78213283	protein_coding	Spag5
368	ENSMUSG00000002057	1.43578	-1.49376	1.7833	0.837639	0.402233	NA	11	78248403	78277384	protein_coding	Foxn1
369	ENSMUSG00000002058	374.844	0.123959	0.119985	-1.03312	0.30155	0.853691	11	78234308	78239990	protein_coding	Unc119
370	ENSMUSG00000002059	207.142	0.173162	0.131075	-1.3211	0.18647	0.773634	11	78079256	78083019	protein_coding	Rab34
371	ENSMUSG00000002064	543.851	0.00572318	0.0911713	-0.062774	0.949946	0.995659	11	78136572	78146322	protein_coding	Sdf2
372	ENSMUSG00000002068	272.869	0.191079	0.130205	-1.46753	0.142233	0.728057	7	37797409	37806959	protein_coding	Ccne1
373	ENSMUSG00000002076	3.6074	-1.48299	0.831358	1.78382	0.0744532	NA	17	32163743	32255323	protein_coding	Hsf2bp
374	ENSMUSG00000002083	46.2417	-0.207244	0.295381	0.701616	0.482919	0.916489	7	16042318	16052130	protein_coding	Bbc3
375	ENSMUSG00000002100	46.8538	-0.372582	0.36529	1.01996	0.307745	0.855118	2	90948489	90966861	protein_coding	Mybpc3
376	ENSMUSG00000002102	2346.39	-0.122905	0.0694337	1.7701	0.0767105	0.617918	2	90884354	90896714	protein_coding	Psmc3
377	ENSMUSG00000002103	1294.58	-0.0158949	0.0725798	0.218999	0.826651	0.976071	2	91033230	91044443	protein_coding	Acp2
378	ENSMUSG00000002104	8.6995	0.618336	0.547001	-1.13041	0.258303	0.830016	2	90865965	90876074	protein_coding	Rapsn
379	ENSMUSG00000002105	395.549	0.192737	0.0971782	-1.98334	0.0473295	0.523857	2	90892136	90900762	protein_coding	Slc39a13
380	ENSMUSG00000002107	7244.27	0.0203729	0.0637558	-0.319546	0.749313	0.966823	2	6544505	7514374	protein_coding	Celf2
381	ENSMUSG00000002108	41.829	-0.578279	0.266555	2.16945	0.0300482	0.452698	2	91014406	91033179	protein_coding	Nr1h3
382	ENSMUSG00000002109	205.65	0.167761	0.166346	-1.00851	0.313212	0.857506	2	91041917	91067327	protein_coding	Ddb2
383	ENSMUSG00000002111	39.5417	-0.0914305	0.326935	0.27966	0.779738	0.972852	2	90912735	90946101	protein_coding	Spi1
384	ENSMUSG00000002129	1313.16	-0.0952964	0.0619212	1.539	0.123805	0.702511	11	4110350	4132541	protein_coding	Sf3a1
385	ENSMUSG00000002147	302.041	-0.0166128	0.201716	0.0823574	0.934363	0.993096	10	127478855	127496826	protein_coding	Stat6
386	ENSMUSG00000002190	256.683	0.085962	0.164357	-0.523019	0.600961	0.94294	8	84116496	84155181	protein_coding	Clgn
387	ENSMUSG00000002204	25.3319	0.312661	0.329959	-0.947573	0.343347	0.869769	7	44221804	44236286	protein_coding	Napsa
388	ENSMUSG00000002205	316.265	0.0756219	0.10682	-0.707938	0.478984	0.916466	7	44397837	44426939	protein_coding	Vrk3
389	ENSMUSG00000002210	695.126	-0.0899374	0.0931422	0.965593	0.334248	0.86592	7	24099044	24122203	protein_coding	Smg9
390	ENSMUSG00000002221	797.609	-0.0312743	0.0742179	0.421384	0.673474	0.958172	5	27945078	27996689	protein_coding	Paxip1
391	ENSMUSG00000002222	2905.73	0.0377999	0.0796344	-0.474668	0.635024	0.949948	6	71365618	71417621	protein_coding	Rmnd5a
392	ENSMUSG00000002227	250.279	0.00685395	0.131837	-0.051988	0.958538	0.99584	3	104702152	104725879	protein_coding	Mov10
393	ENSMUSG00000002228	9.68533	0.806476	0.696907	-1.15722	0.247182	0.820855	3	104688372	104693334	protein_coding	Ppm1j
394	ENSMUSG00000002233	222.361	-0.159702	0.165411	0.965488	0.3343	0.86592	3	104695691	104701775	protein_coding	Rhoc
395	ENSMUSG00000002240	0	NA	NA	NA	NA	NA	5	87973545	87994246	protein_coding	Prr27
396	ENSMUSG00000002249	54.9497	-0.144693	0.304502	0.475179	0.634659	0.949948	17	28550645	28569791	protein_coding	Tead3
397	ENSMUSG00000002250	568.167	0.0498768	0.0829303	-0.601431	0.547553	0.929621	17	28451674	28520448	protein_coding	Ppard
398	ENSMUSG00000002257	20.7889	0.0482621	0.352826	-0.136787	0.891199	0.986577	17	28426752	28447582	protein_coding	Def6
399	ENSMUSG00000002265	10847.3	0.160444	0.113216	-1.41716	0.156437	0.749844	7	6706891	6733430	protein_coding	Peg3
400	ENSMUSG00000002266	79.9002	0.507113	0.281414	-1.80202	0.0715427	0.606738	7	6674268	6699449	protein_coding	Zim1
401	ENSMUSG00000002274	330.165	-0.312305	0.110415	2.82847	0.00467704	0.179138	17	26012195	26016057	protein_coding	Metrn
402	ENSMUSG00000002279	273.722	-0.189088	0.136455	1.38572	0.165833	0.75838	17	25798059	25881800	protein_coding	Lmf1
403	ENSMUSG00000002280	462.396	0.0383988	0.0948005	-0.405048	0.685442	0.960827	17	25992750	26002306	protein_coding	Ciao3
404	ENSMUSG00000002289	19.7607	0.451481	0.383053	-1.17864	0.238543	0.813072	17	33992724	34000804	protein_coding	Angptl4
405	ENSMUSG00000002297	34.38	0.129285	0.286985	-0.450494	0.652354	0.953243	5	8446973	8472716	protein_coding	Dbf4
406	ENSMUSG00000002307	379.517	-0.0799853	0.0941436	0.849609	0.395542	0.89473	17	34128388	34134564	protein_coding	Daxx
407	ENSMUSG00000002308	153.288	-0.262092	0.149074	1.75813	0.0787247	0.6253	17	34062065	34068748	protein_coding	Cd320
408	ENSMUSG00000002319	618.554	-0.098256	0.0823778	1.19275	0.232968	0.811918	14	55862857	55873414	protein_coding	Ipo4
409	ENSMUSG00000002320	347.391	-0.013037	0.100684	0.129484	0.896975	0.989311	14	55873422	55881263	protein_coding	Tm9sf1
410	ENSMUSG00000002324	74.7763	0.298529	0.267428	-1.11629	0.264296	0.832607	14	55855494	55862852	protein_coding	Rec8
411	ENSMUSG00000002325	168.452	0.144199	0.182073	-0.791988	0.428367	0.900255	14	55841028	55847487	protein_coding	Irf9
412	ENSMUSG00000002326	80.0226	-0.143368	0.208014	0.689222	0.490684	0.916597	14	55909398	55916657	protein_coding	Gmpr2
413	ENSMUSG00000002329	525.68	0.100159	0.0832796	-1.20269	0.229098	0.810307	14	55895336	55897965	protein_coding	Mdp1
414	ENSMUSG00000002332	924.083	0.0585451	0.0807906	-0.724652	0.468665	0.915393	14	55976477	55983147	protein_coding	Dhrs1
415	ENSMUSG00000002341	4946.53	-0.10906	0.0889102	1.22663	0.21996	0.80574	8	70545735	70573523	protein_coding	Ncan
416	ENSMUSG00000002342	361.081	0.14619	0.132942	-1.09965	0.271484	0.837161	8	70625006	70636331	protein_coding	Tmem161a
417	ENSMUSG00000002343	395.738	-0.0870126	0.107836	0.806896	0.419727	0.899932	8	70672822	70687116	protein_coding	Armc6
418	ENSMUSG00000002345	407.874	-0.0177773	0.0920012	0.193229	0.846779	0.979542	8	70592149	70599969	protein_coding	Borcs8
419	ENSMUSG00000002346	724.718	-0.0091576	0.0782299	0.11706	0.906812	0.990686	8	70636990	70664955	protein_coding	Slc25a42
420	ENSMUSG00000002365	239.723	0.0651005	0.149241	-0.436209	0.662685	0.954555	17	5891604	5982229	protein_coding	Snx9
421	ENSMUSG00000002372	1444.99	-0.00310351	0.0632263	0.0490856	0.960851	0.99584	17	56980294	57018764	protein_coding	Ranbp3
422	ENSMUSG00000002379	584.902	-0.108785	0.0856493	1.27012	0.204043	0.792026	17	57024767	57029141	protein_coding	Ndufa11
423	ENSMUSG00000002384	8.11279	1.52631	0.61306	-2.48965	0.0127867	0.301222	4	122998958	123025892	protein_coding	Bmp8b
424	ENSMUSG00000002393	54.5773	0.0233188	0.24002	-0.0971538	0.922604	0.99244	8	71826767	71834604	protein_coding	Nr2f6
425	ENSMUSG00000002395	717.82	0.107733	0.0759496	-1.41848	0.156051	0.749514	8	71819492	71822376	protein_coding	Use1
426	ENSMUSG00000002396	257.974	0.071337	0.115833	-0.615861	0.537986	0.927835	8	71823942	71832005	protein_coding	Ocel1
427	ENSMUSG00000002409	406.315	-0.119908	0.124421	0.963731	0.335181	0.866121	7	27878894	27886719	protein_coding	Dyrk1b
428	ENSMUSG00000002413	2940.1	0.0477523	0.0751284	-0.635609	0.525031	0.925844	6	39580171	39702397	protein_coding	Braf
429	ENSMUSG00000002416	242.253	-0.0330206	0.120106	0.274929	0.783371	0.972852	6	39569508	39580316	protein_coding	Ndufb2
430	ENSMUSG00000002428	420.069	-0.145978	0.090501	1.61299	0.106746	0.678234	3	20111975	20172654	protein_coding	Hltf
431	ENSMUSG00000002455	1079.91	0.0206705	0.0716257	-0.28859	0.772895	0.971801	2	181233661	181297453	protein_coding	Prpf6
432	ENSMUSG00000002458	219.761	-0.218888	0.149079	1.46826	0.142033	0.727928	2	181330212	181335770	protein_coding	Rgs19
433	ENSMUSG00000002459	448.815	0.0289735	0.150887	-0.192021	0.847725	0.979728	1	4979799	5140508	protein_coding	Rgs20
434	ENSMUSG00000002475	674.079	0.115469	0.08998	-1.28328	0.199395	0.788344	18	10642092	10706771	protein_coding	Abhd3
435	ENSMUSG00000002477	475.623	0.117885	0.09902	-1.19052	0.233843	0.811918	18	10617775	10642079	protein_coding	Snrpd1
436	ENSMUSG00000002486	167.081	0.219528	0.191079	-1.14888	0.250604	0.821915	5	114845821	114860388	protein_coding	Tchp
437	ENSMUSG00000002489	1944.59	0.172181	0.0910944	-1.89014	0.0587394	0.567375	16	89583999	89940657	protein_coding	Tiam1
438	ENSMUSG00000002496	2806.83	-0.0689711	0.0640509	1.07682	0.281562	0.842833	17	24814790	24851604	protein_coding	Tsc2
439	ENSMUSG00000002500	7.79781	-0.734598	0.723821	1.01489	0.310159	NA	17	24946794	24955117	protein_coding	Rpl3l
440	ENSMUSG00000002504	482.444	0.0244435	0.0859041	-0.284544	0.775994	0.972852	17	24858260	24869301	protein_coding	Nherf2
441	ENSMUSG00000002524	1868	0.0559337	0.0644913	-0.867307	0.385774	0.888978	15	75942031	75952773	protein_coding	Puf60
442	ENSMUSG00000002546	2233.88	-0.0109342	0.0614247	0.178009	0.858716	0.98081	2	32177396	32197933	protein_coding	Golga2
443	ENSMUSG00000002550	459.888	0.0212153	0.0940579	-0.225556	0.821547	0.97554	2	32145014	32150171	protein_coding	Uck1
444	ENSMUSG00000002565	2.11738	1.55462	1.26673	-1.22727	0.219722	NA	12	40109768	40184227	protein_coding	Scin
445	ENSMUSG00000002578	360.194	-0.0485273	0.103929	0.466929	0.640551	0.950716	10	128466712	128505227	protein_coding	Ikzf4
446	ENSMUSG00000002580	208.626	-0.0889104	0.137284	0.64764	0.517218	0.922104	11	98328534	98329817	protein_coding	Mien1
447	ENSMUSG00000002588	0	NA	NA	NA	NA	NA	6	5168090	5193946	protein_coding	Pon1
448	ENSMUSG00000002602	1009.66	0.216554	0.102832	-2.10589	0.0352137	0.481245	7	25456698	25488130	protein_coding	Axl
449	ENSMUSG00000002603	60.4796	-0.445242	0.300334	1.48249	0.13821	0.722516	7	25386427	25404502	protein_coding	Tgfb1
450	ENSMUSG00000002608	851.83	-0.0974688	0.0716405	1.36053	0.173663	0.763335	7	25410531	25418513	protein_coding	Ccdc97
451	ENSMUSG00000002617	463.935	0.189821	0.117356	-1.61748	0.105776	0.676943	17	23392843	23412226	protein_coding	Zfp40
452	ENSMUSG00000002625	3016.75	-0.0148827	0.0779681	0.190882	0.848618	0.979996	17	32540398	32569581	protein_coding	Akap8l
453	ENSMUSG00000002633	44.0349	0.0249897	0.279778	-0.0893195	0.928828	0.993013	5	28661813	28672254	protein_coding	Shh
454	ENSMUSG00000002635	166.078	-0.031317	0.14299	0.219016	0.826638	0.976071	7	33883924	33896086	protein_coding	Pdcd2l
455	ENSMUSG00000002658	1068.01	-0.0254099	0.0657939	0.386205	0.699345	0.964109	17	57310405	57318288	protein_coding	Gtf2f1
456	ENSMUSG00000002660	571.929	-0.0335919	0.0974431	0.344733	0.730295	0.96526	17	57297305	57303188	protein_coding	Clpp
457	ENSMUSG00000002661	110.814	-0.125086	0.205715	0.608056	0.543151	0.928404	17	57304339	57306322	protein_coding	Alkbh7
458	ENSMUSG00000002664	5.75253	-1.04357	0.666474	1.56581	0.117393	NA	17	57306457	57307018	protein_coding	Pspn
459	ENSMUSG00000002668	35.4981	0.0460407	0.283406	-0.162455	0.870948	0.98269	17	57372905	57385514	protein_coding	Dennd1c
460	ENSMUSG00000002679	215.31	-0.0129938	0.127746	0.101716	0.918982	0.992228	12	81620331	81641782	protein_coding	Med6
461	ENSMUSG00000002688	149.872	0.441831	0.157118	-2.8121	0.00492196	0.18274	12	50388014	50695881	protein_coding	Prkd1
462	ENSMUSG00000002699	36.9449	-0.0978182	0.299327	0.326794	0.743824	0.966213	11	33996920	34042295	protein_coding	Lcp2
463	ENSMUSG00000002718	1349.61	0.000905206	0.0874459	-0.0103516	0.991741	0.999189	2	166747960	166788309	protein_coding	Cse1l
464	ENSMUSG00000002728	732.265	-0.0139904	0.0841608	0.166235	0.867972	0.982321	2	145744019	145758345	protein_coding	Naa20
465	ENSMUSG00000002731	195.226	0.116717	0.13552	-0.861254	0.389098	0.891427	2	76460242	76478359	protein_coding	Prkra
466	ENSMUSG00000002732	50.9943	0.170619	0.246416	-0.692402	0.488685	0.916489	2	76493388	76503460	protein_coding	Fkbp7
467	ENSMUSG00000002733	656.062	0.113496	0.080144	-1.41615	0.156731	0.749844	2	76505625	76527172	protein_coding	Plekha3
468	ENSMUSG00000002741	1694.1	-0.114248	0.0747902	1.52757	0.126618	0.707121	11	5905693	5917780	protein_coding	Ykt6
469	ENSMUSG00000002748	2871.77	0.0021416	0.0595743	-0.0359484	0.971324	0.996149	5	135216118	135274983	protein_coding	Baz1b
470	ENSMUSG00000002763	785.023	-0.0133457	0.0948341	0.140727	0.888086	0.985735	17	47022389	47036467	protein_coding	Pex6
471	ENSMUSG00000002767	398.373	-0.21262	0.105365	2.01793	0.0435985	0.514585	17	46957155	46961065	protein_coding	Mrpl2
472	ENSMUSG00000002768	763.554	-0.0583198	0.0822915	0.708698	0.478512	0.916466	17	46989719	46994037	protein_coding	Mea1
473	ENSMUSG00000002769	28.9599	-0.562555	0.329301	1.70833	0.0875749	0.645968	17	47036590	47040094	protein_coding	Gnmt
474	ENSMUSG00000002771	242.089	0.0353598	0.143742	-0.245995	0.805686	0.97487	7	45481307	45527802	protein_coding	Grin2d
475	ENSMUSG00000002778	801.63	-0.0558589	0.0847061	0.659443	0.509611	0.920808	7	45522196	45533156	protein_coding	Kdelr1
476	ENSMUSG00000002781	359.862	-0.109884	0.119938	0.916174	0.359575	0.879219	7	45546365	45566837	protein_coding	Tmem143
477	ENSMUSG00000002791	0.38979	0.372462	1.90145	-0.195883	0.844702	NA	17	32295520	32319260	transcribed_unprocessed_pseudogene	Pdxk-ps
478	ENSMUSG00000002797	214.816	0.130881	0.141084	-0.927681	0.353573	0.876339	6	54959565	54969935	protein_coding	Ggct
479	ENSMUSG00000002799	734.036	-0.0178779	0.0979148	0.182586	0.855123	0.980368	12	112871439	112893396	protein_coding	Jag2
480	ENSMUSG00000002803	918.429	0.110986	0.0811049	-1.36842	0.17118	0.759923	12	112940102	112942565	protein_coding	Btbd6
481	ENSMUSG00000002804	80.3664	-0.132699	0.226096	0.586912	0.557262	0.932132	12	112897911	112905744	protein_coding	Nudt14
482	ENSMUSG00000002808	2119.45	-0.0810652	0.0722934	1.12134	0.262145	0.831627	13	19775876	19804097	protein_coding	Epdr1
483	ENSMUSG00000002812	1144.36	0.0107942	0.0756344	-0.142716	0.886515	0.985307	11	60604949	60618089	protein_coding	Flii
484	ENSMUSG00000002814	131.236	0.201996	0.212925	-0.948671	0.342788	0.869769	11	60630884	60668191	protein_coding	Top3a
485	ENSMUSG00000002820	402.945	-0.0314777	0.109054	0.288644	0.772854	0.971801	9	21176589	21189068	protein_coding	Atg4d
486	ENSMUSG00000002825	192.044	0.308387	0.136597	-2.25764	0.0239679	0.412469	9	21323133	21331570	protein_coding	Qtrt1
487	ENSMUSG00000002831	108.382	1.01896	0.334965	-3.04198	0.00235028	0.125215	17	56407591	56416803	protein_coding	Plin4
488	ENSMUSG00000002833	1419.98	0.0558133	0.0657437	-0.848953	0.395907	0.894879	17	56386634	56407607	protein_coding	Hdgfl2
489	ENSMUSG00000002835	66.7601	-0.316503	0.237978	1.32997	0.183528	0.772664	17	56347439	56379289	protein_coding	Chaf1a
490	ENSMUSG00000002844	1174.61	-0.0995799	0.0929239	1.07163	0.283887	0.843685	16	38264392	38273065	protein_coding	Adprh
491	ENSMUSG00000002845	144.043	-0.0287878	0.152148	0.189209	0.849929	0.979996	16	38379060	38412524	protein_coding	Tmem39a
492	ENSMUSG00000002846	270.623	-0.0208074	0.123377	0.168649	0.866073	0.982098	16	38318709	38343025	protein_coding	Timmdc1
493	ENSMUSG00000002847	23.1412	-0.264649	0.361532	0.73202	0.464156	0.913667	16	38216479	38253507	protein_coding	Pla1a
494	ENSMUSG00000002870	84.5374	-0.215785	0.19346	1.1154	0.264678	0.832607	6	88860456	88875762	protein_coding	Mcm2
495	ENSMUSG00000002871	425.766	-0.0642339	0.0899911	0.713781	0.475363	0.916193	6	88879233	88889220	protein_coding	Tpra1
496	ENSMUSG00000002881	427.232	0.047287	0.0947967	-0.498826	0.617902	0.947712	1	52496453	52539838	protein_coding	Nab1
497	ENSMUSG00000002885	137.577	0.0303771	0.18787	-0.161692	0.871548	0.98269	8	84449880	84467955	protein_coding	Adgre5
498	ENSMUSG00000002897	492.156	-0.659558	0.124331	5.30484	1.13e-07	8.3e-05	6	120440208	120464520	protein_coding	Il17ra
499	ENSMUSG00000002900	184.203	-0.190474	0.19256	0.989167	0.322581	0.861306	12	31315233	31379643	protein_coding	Lamb1
500	ENSMUSG00000002908	282.309	-0.100351	0.121489	0.826014	0.408796	0.896672	8	71294693	71315902	protein_coding	Kcnn1
501	ENSMUSG00000002910	174.696	0.483499	0.185355	-2.6085	0.00909395	0.261557	8	71287773	71292364	protein_coding	Arrdc2
502	ENSMUSG00000002930	3.35361	2.74562	1.21773	-2.25471	0.0241514	NA	6	55994482	56009674	protein_coding	Ppp1r17
503	ENSMUSG00000002944	12.5507	0.686374	0.512563	-1.3391	0.180537	0.769036	5	17986688	18093799	protein_coding	Cd36
504	ENSMUSG00000002948	1076.34	-0.00689488	0.0762754	0.0903945	0.927974	0.993013	8	4288740	4297897	protein_coding	Map2k7
505	ENSMUSG00000002949	1042.56	0.0301345	0.0722573	-0.417044	0.676646	0.958718	8	4309731	4325913	protein_coding	Timm44
506	ENSMUSG00000002957	3232.23	-0.254909	0.0629427	4.04986	5.12e-05	0.00861816	7	141142086	141212924	protein_coding	Ap2a2
507	ENSMUSG00000002963	329.85	0.0265084	0.112549	-0.235529	0.813798	0.975455	7	44506563	44512416	protein_coding	Pnkp
508	ENSMUSG00000002968	1028.35	-0.0792031	0.125281	0.632206	0.527252	0.926799	7	44526189	44542136	protein_coding	Med25
509	ENSMUSG00000002980	264.378	-0.0130423	0.211838	0.0615673	0.950907	0.995659	7	19490056	19504941	protein_coding	Bcam
510	ENSMUSG00000002981	2711.81	-0.103799	0.0640733	1.62	0.105231	0.676394	7	19365496	19398958	protein_coding	Clptm1
511	ENSMUSG00000002983	74.9929	-0.0784529	0.216807	0.361857	0.717459	0.964829	7	19340142	19363363	protein_coding	Relb
512	ENSMUSG00000002984	940.383	-0.0145644	0.0807584	0.180346	0.856881	0.980681	7	19435238	19449363	protein_coding	Tomm40
513	ENSMUSG00000002985	13824.6	0.144623	0.129022	-1.12092	0.262322	0.831627	7	19430034	19433113	protein_coding	Apoe
514	ENSMUSG00000002992	0	NA	NA	NA	NA	NA	7	19405504	19411866	protein_coding	Apoc2
515	ENSMUSG00000002996	290.327	0.120009	0.119206	-1.00674	0.314062	0.8578	12	31976253	32000534	protein_coding	Hbp1
516	ENSMUSG00000002997	953.105	-0.127733	0.0680011	1.8784	0.0603268	0.569012	12	32008475	32111295	protein_coding	Prkar2b
517	ENSMUSG00000003031	693.157	0.0781074	0.076557	-1.02025	0.30761	0.855118	6	134897364	134902476	protein_coding	Cdkn1b
518	ENSMUSG00000003032	58.3273	0.249885	0.352712	-0.708469	0.478654	0.916466	4	55527143	55532466	protein_coding	Klf4
519	ENSMUSG00000003033	1106.83	-0.0731924	0.0676949	1.08121	0.279604	0.841368	8	72993862	73011229	protein_coding	Ap1m1
520	ENSMUSG00000003037	564.977	-0.0438214	0.081053	0.540651	0.588748	0.940042	8	72915044	72937748	protein_coding	Rab8a
521	ENSMUSG00000003038	477.149	0.00527725	0.0913526	-0.057768	0.953933	0.995659	4	133692049	133695961	protein_coding	Hmgn2
522	ENSMUSG00000003039	1310.78	-0.0141043	0.0732342	0.192591	0.847279	0.979542	8	72973574	72978262	protein_coding	Fam32a
523	ENSMUSG00000003051	2.53667	-0.505377	1.14585	0.44105	0.659177	NA	1	135181313	135186306	protein_coding	Elf3
524	ENSMUSG00000003053	0	NA	NA	NA	NA	NA	19	39257849	39319157	protein_coding	Cyp2c29
525	ENSMUSG00000003062	541.896	-0.0758003	0.093076	0.814391	0.415421	0.898454	13	19541846	19579965	protein_coding	Stard3nl
526	ENSMUSG00000003068	992.44	-0.0723565	0.0717924	1.00786	0.313523	0.85776	10	79951637	79966516	protein_coding	Stk11
527	ENSMUSG00000003070	82.7176	-0.134283	0.19511	0.688241	0.491301	0.916597	10	80015316	80025844	protein_coding	Efna2
528	ENSMUSG00000003072	1865.81	-0.139408	0.0725931	1.9204	0.0548075	0.552691	10	79974466	79981652	protein_coding	Atp5f1d
529	ENSMUSG00000003099	2086.32	-0.0374456	0.067283	0.556538	0.577843	0.937297	7	16738565	16761849	protein_coding	Ppp5c
530	ENSMUSG00000003119	543.542	0.276654	0.101215	-2.73332	0.00626986	0.213308	11	98093885	98169330	protein_coding	Cdk12
531	ENSMUSG00000003123	127.156	0.259114	0.161382	-1.6056	0.108362	0.680412	7	25078952	25098135	protein_coding	Lipe
532	ENSMUSG00000003131	3404.75	-0.0141631	0.0632697	0.223852	0.822872	0.975788	9	45874157	45923988	protein_coding	Pafah1b2
533	ENSMUSG00000003134	373.698	-0.0270304	0.0950972	0.28424	0.776227	0.972852	1	39410573	39517836	protein_coding	Tbc1d8
534	ENSMUSG00000003135	507.332	-0.0499016	0.0866719	0.575753	0.564782	0.935237	1	39574073	39585970	protein_coding	Cnot11
535	ENSMUSG00000003153	2323.84	-0.163561	0.0585059	2.79564	0.00517978	0.188188	6	122704768	122778599	protein_coding	Slc2a3
536	ENSMUSG00000003154	771.703	-0.106775	0.0869287	1.22831	0.21933	0.80574	6	122796873	122822325	protein_coding	Foxj2
537	ENSMUSG00000003161	702.639	-0.111755	0.0885531	1.26201	0.206944	0.795846	5	8096078	8119379	protein_coding	Sri
538	ENSMUSG00000003166	1466.86	0.0134526	0.0619028	-0.217318	0.827961	0.976106	16	17657346	17716426	protein_coding	Dgcr2
539	ENSMUSG00000003184	295.169	0.111707	0.114591	-0.974836	0.329642	0.864683	7	44647072	44652272	protein_coding	Irf3
540	ENSMUSG00000003190	20.4859	-0.471376	0.458066	1.02906	0.303452	0.854388	7	44640646	44648136	protein_coding	Bcl2l12
541	ENSMUSG00000003198	90.2463	0.132761	0.192613	-0.689262	0.490659	0.916597	17	56199093	56205928	protein_coding	Zfp959
542	ENSMUSG00000003199	859.884	-0.126485	0.0713448	1.77287	0.0762504	0.616392	17	56312711	56323790	protein_coding	Mpnd
543	ENSMUSG00000003200	534.425	0.028953	0.0827545	-0.349867	0.726439	0.964829	17	56323750	56343635	protein_coding	Sh3gl1
544	ENSMUSG00000003206	7.62907	-0.124894	0.5774	0.216304	0.828751	NA	17	56259640	56264022	protein_coding	Ebi3
545	ENSMUSG00000003208	107.817	0.0367661	0.173426	-0.211999	0.832108	0.976248	17	56266099	56275285	protein_coding	Yju2
546	ENSMUSG00000003226	2700.29	0.0409759	0.0692595	-0.591628	0.5541	0.931297	10	58282742	58330178	protein_coding	Ranbp2
547	ENSMUSG00000003227	5.32986	0.289213	0.691611	-0.418172	0.675821	NA	10	58436611	58511476	protein_coding	Edar
548	ENSMUSG00000003228	352.741	-0.387744	0.116132	3.33883	0.000841316	0.0685384	19	60878187	61084406	protein_coding	Grk5
549	ENSMUSG00000003233	1326.86	0.0449097	0.081945	-0.548047	0.583659	0.939099	16	20335732	20352760	protein_coding	Dvl3
550	ENSMUSG00000003234	1206.34	0.00238237	0.0635663	-0.0374785	0.970104	0.99613	16	20367327	20380129	protein_coding	Abcf3
551	ENSMUSG00000003235	977.789	-0.0337092	0.0851657	0.395807	0.692247	0.962578	16	20317567	20328073	protein_coding	Eif2b5
552	ENSMUSG00000003269	1380.1	0.0435588	0.0650522	-0.669599	0.503114	0.919339	7	45456061	45464005	protein_coding	Cyth2
553	ENSMUSG00000003271	165.36	-0.186734	0.143073	1.30516	0.191838	0.782281	7	45379407	45434093	protein_coding	Sult2b1
554	ENSMUSG00000003273	2145.46	-0.0222521	0.0820488	0.271206	0.786233	0.973354	7	45349267	45354106	protein_coding	Car11
555	ENSMUSG00000003279	10309.6	-0.0382893	0.0583261	0.65647	0.511522	0.920808	17	70276068	71128408	protein_coding	Dlgap1
556	ENSMUSG00000003282	108.282	0.00901406	0.22503	-0.0400571	0.968048	0.99584	4	3900996	3938423	protein_coding	Plag1
557	ENSMUSG00000003283	35.4105	-0.187257	0.33555	0.55806	0.576803	0.937297	2	152950388	152993361	protein_coding	Hck
558	ENSMUSG00000003299	688.214	0.0166098	0.0767667	-0.216367	0.828701	0.976143	9	20914034	20920135	protein_coding	Mrpl4
559	ENSMUSG00000003308	681.796	-0.0881578	0.0805026	1.09509	0.273476	0.837553	9	21141026	21150657	protein_coding	Keap1
560	ENSMUSG00000003309	19.5248	0.250333	0.434672	-0.575912	0.564675	0.935227	9	21205571	21223633	protein_coding	Ap1m2
561	ENSMUSG00000003316	5454.09	-0.00990346	0.0614508	0.161161	0.871967	0.98276	8	111881053	111985848	protein_coding	Glg1
562	ENSMUSG00000003341	3.44239	0.629844	0.852605	-0.738728	0.460072	NA	10	80355418	80374958	protein_coding	Atp8b3
563	ENSMUSG00000003344	1291.55	-0.0985541	0.0758239	1.29978	0.193677	0.784019	10	80478451	80492328	protein_coding	Btbd2
564	ENSMUSG00000003345	2373.03	-0.0193805	0.0856813	0.226193	0.821052	0.97554	10	80458672	80476583	protein_coding	Csnk1g2
565	ENSMUSG00000003346	1248.35	-0.105381	0.0861235	1.2236	0.221102	0.806786	10	80419488	80426175	protein_coding	Abhd17a
566	ENSMUSG00000003348	160.642	-0.0536074	0.146553	0.365788	0.714523	0.96478	10	80521087	80537811	protein_coding	Mob3a
567	ENSMUSG00000003352	5791.6	0.0794776	0.0885256	-0.897792	0.369297	0.88118	15	98528721	98542410	protein_coding	Cacnb3
568	ENSMUSG00000003354	129.142	-0.0137936	0.175453	0.0786172	0.937337	0.993944	15	98606088	98621217	protein_coding	Ccdc65
569	ENSMUSG00000003355	13.703	0.358483	0.44015	-0.814458	0.415382	0.898454	15	98622247	98626079	protein_coding	Fkbp11
570	ENSMUSG00000003360	1283.95	0.00956518	0.0674537	-0.141804	0.887235	0.985401	15	98543015	98560775	protein_coding	Ddx23
571	ENSMUSG00000003363	13397	-0.0728141	0.0768151	0.947913	0.343174	0.869769	7	27231425	27252643	protein_coding	Pld3
572	ENSMUSG00000003378	3640.29	-0.208041	0.0853384	2.43783	0.0147756	0.317388	7	24709274	24771771	protein_coding	Grik5
573	ENSMUSG00000003379	11.5983	-0.679387	0.603788	1.12521	0.260501	0.83056	7	24596806	24601622	protein_coding	Cd79a
574	ENSMUSG00000003380	943.097	0.0476767	0.0809274	-0.589128	0.555775	0.931409	7	24669177	24672179	protein_coding	Rabac1
575	ENSMUSG00000003382	547.734	0.123162	0.0822835	-1.4968	0.134446	0.719367	3	87432714	87447463	protein_coding	Etv3
576	ENSMUSG00000003402	1089.17	-0.112415	0.0787345	1.42778	0.153356	0.745429	9	21914102	21925518	protein_coding	Prkcsh
577	ENSMUSG00000003410	4175.93	-0.0582133	0.0710715	0.819081	0.41274	0.898392	9	21926301	21963319	protein_coding	Elavl3
578	ENSMUSG00000003411	842.869	-0.226295	0.12066	1.87547	0.0607279	0.570358	4	108736260	108800521	protein_coding	Rab3b
579	ENSMUSG00000003418	31.683	0.894241	0.359917	-2.48458	0.0129706	0.30214	2	13655832	13798875	protein_coding	St8sia6
580	ENSMUSG00000003420	294.772	0.0299264	0.201762	-0.148326	0.882086	0.984814	7	44742414	44753275	protein_coding	Fcgrt
581	ENSMUSG00000003421	690.985	-0.0945643	0.0791493	1.19476	0.232181	0.811399	7	44711853	44727634	protein_coding	Nosip
582	ENSMUSG00000003423	306.685	0.0598712	0.110323	-0.542688	0.587344	0.940042	7	44803727	44809489	protein_coding	Pih1d1
583	ENSMUSG00000003429	1038.27	0.0479987	0.0896727	-0.535266	0.592466	0.9408	7	44771803	44773863	protein_coding	Rps11
584	ENSMUSG00000003435	2773.24	-0.0340816	0.0651527	0.523103	0.600902	0.94294	7	28014316	28038171	protein_coding	Supt5
585	ENSMUSG00000003436	10.9741	-0.11196	0.552963	0.202472	0.839548	0.977756	7	27992978	28001663	protein_coding	Dll3
586	ENSMUSG00000003437	835.609	0.0216457	0.0784694	-0.275849	0.782664	0.972852	7	28092376	28098813	protein_coding	Paf1
587	ENSMUSG00000003438	334.671	0.0880302	0.102074	-0.862419	0.388457	0.890984	7	28004941	28011497	protein_coding	Timm50
588	ENSMUSG00000003444	114.993	0.19966	0.172078	-1.16028	0.245934	0.819906	7	28085571	28092133	protein_coding	Med29
589	ENSMUSG00000003452	749.636	-0.199595	0.0817603	2.44123	0.0146375	0.316346	6	149310384	149464827	protein_coding	Bicd1
590	ENSMUSG00000003458	1362.9	-0.0371347	0.064527	0.575491	0.56496	0.935237	1	171893580	171910362	protein_coding	Ncstn
591	ENSMUSG00000003464	1442.22	-0.0242126	0.0735731	0.329096	0.742083	0.965913	1	171954322	171964060	protein_coding	Pex19
592	ENSMUSG00000003469	11401.4	-0.0584565	0.0701798	0.832954	0.404871	0.89611	14	70694916	70706272	protein_coding	Phyhip
593	ENSMUSG00000003476	15.5493	-0.0193471	0.435636	0.0444111	0.964577	0.99584	6	55067034	55110001	protein_coding	Crhr2
594	ENSMUSG00000003477	39.4945	0.554208	0.395154	-1.40251	0.160763	0.752728	6	55147611	55152028	protein_coding	Inmt
595	ENSMUSG00000003484	12.0541	0.282285	0.596121	-0.473536	0.635831	0.949948	8	72742326	72763470	protein_coding	Cyp4f18
596	ENSMUSG00000003500	1096.32	0.0498758	0.0844008	-0.59094	0.554561	0.931409	6	29200433	29216363	protein_coding	Impdh1
597	ENSMUSG00000003505	0	NA	NA	NA	NA	NA	7	18079347	18088934	protein_coding	Psg18
598	ENSMUSG00000003518	3504.06	-0.0224327	0.0673593	0.333031	0.739111	0.965913	11	101861969	101877839	protein_coding	Dusp3
599	ENSMUSG00000003526	625.767	0.237993	0.139299	-1.70851	0.087542	0.645968	16	17878221	17908067	protein_coding	Prodh
600	ENSMUSG00000003527	553.412	-0.0284951	0.082986	0.343372	0.731319	0.96526	16	17718573	17729212	protein_coding	Ess2
601	ENSMUSG00000003528	435.08	0.114098	0.1055	-1.08149	0.279478	0.841348	16	17743087	17746083	protein_coding	Slc25a1
602	ENSMUSG00000003531	720.263	-0.0651286	0.100434	0.648474	0.516679	0.922104	16	17870724	17889496	protein_coding	Dgcr6
603	ENSMUSG00000003534	919.623	-0.0334792	0.0832602	0.402104	0.687608	0.960897	17	35992459	36015513	protein_coding	Ddr1
604	ENSMUSG00000003541	127.707	0.221784	0.174377	-1.27186	0.203422	0.791846	17	36132576	36133815	protein_coding	Ier3
605	ENSMUSG00000003545	178.379	-0.11289	0.17379	0.649579	0.515964	0.922016	7	19036621	19043976	protein_coding	Fosb
606	ENSMUSG00000003546	419.443	0.0288549	0.105019	-0.274759	0.783502	0.972852	17	46941550	46956948	protein_coding	Klc4
607	ENSMUSG00000003549	318.742	0.0502761	0.125724	-0.399893	0.689235	0.961302	7	19078703	19090449	protein_coding	Ercc1
608	ENSMUSG00000003555	0.725123	-1.11565	1.55649	0.716772	0.473515	NA	19	46655604	46661611	protein_coding	Cyp17a1
609	ENSMUSG00000003559	150.539	0.177821	0.156654	-1.13512	0.256327	0.828173	19	46695897	46729538	protein_coding	As3mt
610	ENSMUSG00000003573	66.4376	0.130446	0.257062	-0.507451	0.611838	0.945809	8	70735477	70747011	protein_coding	Homer3
611	ENSMUSG00000003575	4776.89	-0.0208225	0.0806959	0.258037	0.796378	0.974199	8	70835005	70892229	protein_coding	Crtc1
612	ENSMUSG00000003581	355.938	0.0652215	0.13862	-0.470506	0.637993	0.949948	11	4085202	4091172	protein_coding	Rnf215
613	ENSMUSG00000003585	808.89	-0.0200467	0.0869656	0.230514	0.817693	0.97554	11	4047039	4073415	protein_coding	Sec14l2
614	ENSMUSG00000003604	110.824	-0.153015	0.179493	0.852486	0.393944	0.893788	2	112323309	112464918	protein_coding	Aven
615	ENSMUSG00000003617	356.602	0.323939	0.473007	-0.684851	0.493438	0.91706	3	20011218	20063309	protein_coding	Cp
616	ENSMUSG00000003623	550.366	0.142889	0.101867	-1.40269	0.160708	0.752728	5	9016033	9047324	protein_coding	Crot
617	ENSMUSG00000003644	226.439	0.0358413	0.129059	-0.277712	0.781233	0.972852	4	133574601	133615108	protein_coding	Rps6ka1
618	ENSMUSG00000003657	168.152	0.059361	0.24103	-0.24628	0.805465	0.97487	8	110864134	110894842	protein_coding	Calb2
619	ENSMUSG00000003660	2844.01	-0.0169352	0.0607196	0.278907	0.780316	0.972852	2	127050306	127082371	protein_coding	Snrnp200
620	ENSMUSG00000003662	866.666	0.0424226	0.0740439	-0.572938	0.566687	0.935586	2	127082858	127089736	protein_coding	Ciao1
621	ENSMUSG00000003665	26.8585	0.785085	0.367349	-2.13717	0.0325843	0.470435	17	18063585	18075467	protein_coding	Has1
622	ENSMUSG00000003680	157.5	-0.178615	0.214736	0.831788	0.405529	0.896672	19	8751851	8763781	protein_coding	Taf6l
623	ENSMUSG00000003721	685.945	0.0561713	0.101275	-0.554643	0.579139	0.937297	1	121232082	121260318	protein_coding	Insig2
624	ENSMUSG00000003731	2269.06	0.00453309	0.0590832	-0.0767239	0.938843	0.993944	4	129537773	129566560	protein_coding	Kpna6
625	ENSMUSG00000003746	318.24	-0.454712	0.186684	2.43573	0.0148618	0.317693	10	53780881	53952705	protein_coding	Man1a
626	ENSMUSG00000003752	70.4627	0.221692	0.214738	-1.03238	0.301893	0.853705	7	26906597	26928086	protein_coding	Itpkc
627	ENSMUSG00000003762	192.869	0.162579	0.219524	-0.740599	0.458937	0.912136	7	26932448	26957375	protein_coding	Coq8b
628	ENSMUSG00000003778	1222.3	-0.0491617	0.0709533	0.692874	0.488389	0.916489	18	34731668	34757654	protein_coding	Brd8
629	ENSMUSG00000003779	31.8094	-0.00532892	0.297566	0.0179083	0.985712	0.998034	18	34757666	34766330	protein_coding	Kif20a
630	ENSMUSG00000003808	563.512	0.0612431	0.0924245	-0.662628	0.507569	0.920705	8	85583618	85595886	protein_coding	Farsa
631	ENSMUSG00000003809	503.674	0.0647779	0.0919895	-0.704188	0.481315	0.916466	8	85613022	85620550	protein_coding	Gcdh
632	ENSMUSG00000003810	3082.56	-0.1659	0.0652538	2.54238	0.01101	0.283801	4	116163959	116321471	protein_coding	Mast2
633	ENSMUSG00000003812	84.3104	-0.086045	0.195219	0.440761	0.659386	0.954522	8	85635189	85649544	protein_coding	Dnase2a
634	ENSMUSG00000003813	750.16	-0.0629175	0.0748055	0.841082	0.400302	0.895681	8	85560648	85567294	protein_coding	Rad23a
635	ENSMUSG00000003814	4833.21	-0.0957769	0.0602167	1.59054	0.111714	0.683515	8	85568479	85573563	protein_coding	Calr
636	ENSMUSG00000003824	29.638	0.735878	0.316612	-2.32422	0.0201135	0.374485	8	85598740	85614850	protein_coding	Syce2
637	ENSMUSG00000003847	2239.48	0.024775	0.0964213	-0.256945	0.797221	0.974199	8	108020102	108106149	protein_coding	Nfat5
638	ENSMUSG00000003848	465.3	-0.0474894	0.0871692	0.544796	0.585894	0.939993	8	108139118	108151683	protein_coding	Nob1
639	ENSMUSG00000003849	48.3256	0.112977	0.25189	-0.448519	0.653779	0.953243	8	108114857	108129838	protein_coding	Nqo1
640	ENSMUSG00000003863	3834.9	-0.0921852	0.0880542	1.04691	0.295139	0.84681	7	44988546	45016443	protein_coding	Ppfia3
641	ENSMUSG00000003865	423.659	-0.0237795	0.0901387	0.26381	0.791926	0.974199	7	45084268	45106043	protein_coding	Gys1
642	ENSMUSG00000003868	347.563	-0.200884	0.0997229	2.01442	0.0439655	0.515465	7	45071184	45087520	protein_coding	Ruvbl2
643	ENSMUSG00000003872	364.474	0.060921	0.134353	-0.453439	0.650233	0.952907	7	45017315	45020007	protein_coding	Lin7b
644	ENSMUSG00000003873	289.857	-0.00224975	0.127224	0.0176833	0.985891	0.998101	7	45111121	45116322	protein_coding	Bax
645	ENSMUSG00000003882	3.76036	0.0430916	0.789745	-0.0545639	0.956486	NA	15	9505874	9530262	protein_coding	Il7r
646	ENSMUSG00000003923	529.894	-0.0485871	0.0845693	0.574524	0.565613	0.935438	10	71061294	71074110	protein_coding	Tfam
647	ENSMUSG00000003929	545.375	0.00860243	0.0932581	-0.0922432	0.926505	0.992887	17	33548316	33577852	protein_coding	Zfp81
648	ENSMUSG00000003934	734.548	-0.109973	0.330603	0.332644	0.739403	0.965913	11	69444918	69451031	protein_coding	Efnb3
649	ENSMUSG00000003948	2417.27	-0.175013	0.0875037	2.00006	0.0454939	0.517386	11	90140282	90169415	protein_coding	Mmd
650	ENSMUSG00000003949	6182.59	0.254409	0.0927866	-2.74187	0.00610903	0.21021	11	90227362	90281721	protein_coding	Hlf
651	ENSMUSG00000003955	222.246	0.187444	0.126195	-1.48535	0.13745	0.722516	16	35864131	35891964	protein_coding	Fam162a
652	ENSMUSG00000003970	3200.93	-0.0182985	0.0738098	0.247914	0.804201	0.974743	15	76788278	76790514	protein_coding	Rpl8
653	ENSMUSG00000003974	1151.28	-0.00898011	0.0826156	0.108697	0.913442	0.99113	5	9535541	9775170	protein_coding	Grm3
654	ENSMUSG00000003992	962.345	-0.107916	0.0755183	1.429	0.153003	0.744508	13	91608402	91851548	protein_coding	Ssbp2
655	ENSMUSG00000004018	85.488	0.0813155	0.194554	-0.417959	0.675977	0.958718	11	26336135	26421876	protein_coding	Fancl
656	ENSMUSG00000004031	2262.76	0.0128668	0.0679454	-0.18937	0.849802	0.979996	1	158072839	158183896	protein_coding	Brinp2
657	ENSMUSG00000004032	1651.08	0.130959	0.0928965	-1.40973	0.15862	0.752191	3	107803137	107806002	protein_coding	Gstm5
658	ENSMUSG00000004035	159.285	-0.025913	0.153012	0.169353	0.865519	0.982098	3	107833650	107839133	protein_coding	Gstm7
659	ENSMUSG00000004038	0.120467	14.8684	283.949	-0.0523627	0.95824	NA	3	107871012	107876599	protein_coding	Gstm3
660	ENSMUSG00000004040	910.664	0.0575514	0.0752499	-0.764804	0.444389	0.909166	11	100775924	100830366	protein_coding	Stat3
661	ENSMUSG00000004043	37.443	0.462314	0.28172	-1.64104	0.100789	0.669539	11	100750177	100775995	protein_coding	Stat5a
662	ENSMUSG00000004044	333.289	0.138635	0.200589	-0.691139	0.489478	0.916517	11	100847559	100861713	protein_coding	Cavin1
663	ENSMUSG00000004054	334.336	-0.169205	0.106577	1.58763	0.11237	0.685335	19	5738770	5752893	protein_coding	Map3k11
664	ENSMUSG00000004056	1994.63	0.0539466	0.071341	-0.756179	0.449542	0.909441	7	27290977	27340251	protein_coding	Akt2
665	ENSMUSG00000004069	1050.12	-0.0217793	0.0695505	0.313144	0.754171	0.968105	16	4457853	4525559	protein_coding	Dnaja3
666	ENSMUSG00000004070	730.143	0.080553	0.0817676	-0.985146	0.324552	0.862804	16	4544225	4584606	protein_coding	Hmox2
667	ENSMUSG00000004071	4210.55	-0.0479923	0.0587828	0.816434	0.414252	0.898454	16	4568212	4608156	protein_coding	Cdip1
668	ENSMUSG00000004085	131.503	0.0983645	0.158527	-0.620489	0.534936	0.927835	2	72115981	72272954	protein_coding	Map3k20
669	ENSMUSG00000004096	726.077	0.106266	0.0889567	-1.19458	0.23225	0.811399	9	14411913	14421873	protein_coding	Cwc15
670	ENSMUSG00000004098	56.6139	0.25401	0.310418	-0.818284	0.413195	0.898454	9	20681346	20726363	protein_coding	Col5a3
671	ENSMUSG00000004099	1227.55	-0.144044	0.0762193	1.88987	0.0587758	0.56739	9	20818505	20871184	protein_coding	Dnmt1
672	ENSMUSG00000004100	236.645	-0.0246666	0.144981	0.170137	0.864902	0.982098	9	20799471	20803474	protein_coding	Ppan
673	ENSMUSG00000004105	101.655	-0.246872	0.690559	0.357496	0.720721	0.964829	2	33106081	33137729	protein_coding	Angptl2
674	ENSMUSG00000004110	6743.46	0.0358979	0.0685965	-0.523319	0.600752	0.94294	1	154266477	154760247	protein_coding	Cacna1e
675	ENSMUSG00000004113	3497.94	0.0546891	0.0673282	-0.812277	0.416633	0.898557	2	24493899	24653164	protein_coding	Cacna1b
676	ENSMUSG00000004127	114.083	-0.0850362	0.168477	0.504734	0.613746	0.946678	3	137849209	137865582	protein_coding	Trmt10a
677	ENSMUSG00000004151	1191.79	-0.306135	0.237459	1.28921	0.197324	0.788344	12	38829379	38920483	protein_coding	Etv1
678	ENSMUSG00000004187	11208.6	0.0368952	0.0612939	-0.60194	0.547214	0.929545	15	76544058	76552396	protein_coding	Kifc2
679	ENSMUSG00000004207	26612.3	0.0295245	0.0650324	-0.453998	0.649831	0.952907	10	60113449	60138376	protein_coding	Psap
680	ENSMUSG00000004221	815.087	0.0754369	0.0804597	-0.937574	0.348463	0.873235	X	73436896	73497460	protein_coding	Ikbkg
681	ENSMUSG00000004231	11.7932	-0.597644	0.565364	1.0571	0.290468	0.844943	19	44735057	44826310	protein_coding	Pax2
682	ENSMUSG00000004233	136.963	0.159501	0.156108	-1.02173	0.306907	0.855118	3	99048384	99146502	protein_coding	Wars2
683	ENSMUSG00000004263	291.319	-0.00731816	0.119493	0.0612436	0.951165	0.995659	6	124719507	124733487	protein_coding	Atn1
684	ENSMUSG00000004264	656.007	-0.0706827	0.0774741	0.912339	0.36159	0.879219	6	124689299	124693913	protein_coding	Phb2
685	ENSMUSG00000004266	69.6761	0.0680113	0.21485	-0.316552	0.751584	0.966823	6	124697670	124715677	protein_coding	Ptpn6
686	ENSMUSG00000004267	16870.3	-0.0634953	0.0843945	0.752364	0.451832	0.909678	6	124737016	124746636	protein_coding	Eno2
687	ENSMUSG00000004268	397.9	0.077923	0.109312	-0.71285	0.475939	0.916329	6	124681048	124689141	protein_coding	Emg1
688	ENSMUSG00000004270	279	0.0897466	0.116808	-0.768324	0.442295	0.908199	6	124639990	124681381	protein_coding	Lpcat3
689	ENSMUSG00000004285	1106.7	-0.102622	0.065043	1.57776	0.11462	0.68675	6	29467717	29470511	protein_coding	Atp6v1f
690	ENSMUSG00000004296	0.940348	17.545	264.977	-0.0662133	0.947208	NA	11	44290890	44304860	protein_coding	Il12b
691	ENSMUSG00000004317	257.714	0.169696	0.138446	-1.22572	0.220305	0.806201	X	7020049	7185597	protein_coding	Clcn5
692	ENSMUSG00000004319	3741.93	-0.0206872	0.0612086	0.337978	0.73538	0.96526	8	61363423	61436334	protein_coding	Clcn3
693	ENSMUSG00000004328	182.908	0.781702	0.267923	-2.91764	0.00352691	0.150422	7	16765432	16796352	protein_coding	Hif3a
694	ENSMUSG00000004341	0.352631	16.2463	273.701	-0.0593579	0.952667	NA	13	21496295	21503794	protein_coding	Gpx6
695	ENSMUSG00000004344	0	NA	NA	NA	NA	NA	13	21470599	21476901	protein_coding	Gpx5
696	ENSMUSG00000004347	70.8452	-0.39343	0.236734	1.66191	0.096531	0.661037	6	56046789	56629472	protein_coding	Pde1c
697	ENSMUSG00000004356	499.722	0.135065	0.110736	-1.2197	0.222578	0.807785	10	88582469	88662666	protein_coding	Utp20
698	ENSMUSG00000004359	0.541872	-0.624301	1.61577	0.386381	0.699214	NA	10	88510634	88520877	protein_coding	Spic
699	ENSMUSG00000004360	1323.31	0.0207826	0.0793871	-0.261789	0.793484	0.974199	10	29087602	29106775	protein_coding	9330159F19Rik
700	ENSMUSG00000004364	2251.44	-0.0611096	0.0715091	0.85457	0.392789	0.893501	1	80242640	80318197	protein_coding	Cul3
701	ENSMUSG00000004366	1575.98	-0.127417	0.255346	0.498995	0.617783	0.947712	16	23708323	23709708	protein_coding	Sst
702	ENSMUSG00000004371	6.20256	-0.610071	0.653238	0.933918	0.350346	NA	7	4775372	4785858	protein_coding	Il11
703	ENSMUSG00000004383	2788.11	-0.213157	0.0631809	3.37376	0.000741497	0.063948	8	73541227	74080168	protein_coding	Large1
704	ENSMUSG00000004393	550.898	0.0735233	0.0896788	-0.819852	0.412301	0.898103	11	6208919	6217772	protein_coding	Ddx56
705	ENSMUSG00000004394	956.447	0.0252146	0.0680802	-0.370366	0.71111	0.96478	11	6220369	6224870	protein_coding	Tmed4
706	ENSMUSG00000004415	192.69	0.544977	0.138398	-3.93776	8.22e-05	0.0121018	5	136770613	136912063	protein_coding	Col26a1
707	ENSMUSG00000004446	172.319	-0.348879	0.146493	2.38154	0.0172403	0.344344	6	120868891	120893814	protein_coding	Bid
708	ENSMUSG00000004451	310.222	0.274924	0.111655	-2.46225	0.0138068	0.308214	1	119398035	119432524	protein_coding	Ralb
709	ENSMUSG00000004455	1327.48	-0.0288849	0.0826938	0.349299	0.726865	0.964829	5	122296341	122313336	protein_coding	Ppp1cc
710	ENSMUSG00000004460	698.185	0.0570311	0.0763107	-0.747355	0.454849	0.910574	16	22676595	22698384	protein_coding	Dnajb11
711	ENSMUSG00000004462	284.498	-0.133813	0.127687	1.04798	0.294648	0.84681	16	22631964	22676419	protein_coding	Tbccd1
712	ENSMUSG00000004473	84.6623	-0.265689	0.271343	0.979163	0.327499	0.864683	7	43952111	43956326	protein_coding	Clec11a
713	ENSMUSG00000004500	201.777	0.194397	0.156596	-1.24139	0.214461	0.802067	7	12699765	12708163	protein_coding	Zfp324
714	ENSMUSG00000004508	440.814	-0.107587	0.122747	0.876497	0.38076	0.886365	7	96730793	96958153	protein_coding	Gab2
715	ENSMUSG00000004530	1066.22	-0.111076	0.0733109	1.51513	0.129739	0.711266	5	113980497	114046819	protein_coding	Coro1c
716	ENSMUSG00000004535	2380.75	0.0159025	0.0588948	-0.270015	0.787149	0.973354	6	52690714	52743765	protein_coding	Tax1bp1
717	ENSMUSG00000004540	2.68375	0.0171807	0.935004	-0.018375	0.98534	NA	7	18547862	18555532	protein_coding	Psg17
718	ENSMUSG00000004542	0.566688	1.16724	2.54802	-0.458097	0.646883	NA	7	18523492	18532445	protein_coding	Psg19
719	ENSMUSG00000004552	0.567035	-2.16404	1.85147	1.16882	0.242477	NA	1	131566044	131603243	protein_coding	Ctse
720	ENSMUSG00000004558	10915.7	0.105744	0.0759082	-1.39305	0.163604	0.755231	14	52142728	52151615	protein_coding	Ndrg2
721	ENSMUSG00000004561	446.649	-0.157024	0.088406	1.77617	0.0757048	0.615842	14	52122299	52130496	protein_coding	Mettl17
722	ENSMUSG00000004562	393.087	0.106922	0.120715	-0.885739	0.375758	0.88499	14	52222176	52243708	protein_coding	Arhgef40
723	ENSMUSG00000004565	1288.66	0.0170604	0.0623074	-0.27381	0.784231	0.972892	8	3565384	3594267	protein_coding	Pnpla6
724	ENSMUSG00000004567	1612.58	-0.0559416	0.0673863	0.830163	0.406447	0.896672	8	3550457	3565232	protein_coding	Mcoln1
725	ENSMUSG00000004568	1002.79	-0.066689	0.0751616	0.887275	0.374931	0.884151	8	3403415	3506601	protein_coding	Arhgef18
726	ENSMUSG00000004591	596.098	-0.207856	0.136911	1.51818	0.128969	0.710296	3	142496663	142587765	protein_coding	Pkn2
727	ENSMUSG00000004609	203.851	0.00701348	0.160455	-0.04371	0.965136	0.99584	7	43173640	43193852	protein_coding	Cd33
728	ENSMUSG00000004610	26.0982	0.0278549	0.342973	-0.0812162	0.93527	0.993267	7	43093507	43107224	protein_coding	Etfb
729	ENSMUSG00000004612	0.117544	14.8675	283.956	-0.0523583	0.958243	NA	7	43086497	43087673	protein_coding	Nkg7
730	ENSMUSG00000004626	767.016	-0.0706825	0.116911	0.604585	0.545455	0.929336	8	3680955	3693644	protein_coding	Stxbp2
731	ENSMUSG00000004630	7.06997	-1.21263	0.662455	1.83051	0.0671732	NA	8	3673371	3675545	protein_coding	Pcp2
732	ENSMUSG00000004631	378.971	-0.0174162	0.121524	0.143315	0.886041	0.985307	6	4674350	4747207	protein_coding	Sgce
733	ENSMUSG00000004633	619.553	-0.744754	0.111788	6.66217	2.7e-11	1.19e-07	6	54016539	54278795	protein_coding	Chn2
734	ENSMUSG00000004637	498.461	0.0146346	0.127833	-0.114483	0.908855	0.990686	8	115166395	116079447	protein_coding	Wwox
735	ENSMUSG00000004642	331.874	0.0536396	0.11518	-0.465704	0.641427	0.950927	5	33792296	33809918	protein_coding	Slbp
736	ENSMUSG00000004651	0.352631	16.2463	273.701	-0.0593579	0.952667	NA	7	87073979	87142720	protein_coding	Tyr
737	ENSMUSG00000004654	0	NA	NA	NA	NA	NA	6	55353280	55365515	protein_coding	Ghrhr
738	ENSMUSG00000004655	7.05723	-0.346046	0.661796	0.522889	0.601052	NA	6	55313417	55325540	protein_coding	Aqp1
739	ENSMUSG00000004661	157.471	0.179379	0.152276	-1.17799	0.238801	0.813072	9	57697636	57744076	protein_coding	Arid3b
740	ENSMUSG00000004665	114.57	0.105979	0.548795	-0.193113	0.846871	0.979542	10	79824418	79831896	protein_coding	Cnn2
741	ENSMUSG00000004667	853.106	-0.0960672	0.0757616	1.26802	0.204791	0.793155	10	79871783	79875629	protein_coding	Polr2e
742	ENSMUSG00000004668	7.61591	0.386661	0.65266	-0.592439	0.553557	NA	11	9141942	9634259	protein_coding	Abca13
743	ENSMUSG00000004677	1506.3	-0.0248628	0.0798663	0.311305	0.755569	0.968346	8	71725358	71813357	protein_coding	Myo9b
744	ENSMUSG00000004698	770.212	-0.201224	0.139474	1.44274	0.149095	0.737751	12	34097579	34967094	protein_coding	Hdac9
745	ENSMUSG00000004707	7.6317	1.18024	0.647726	-1.82213	0.0684359	NA	1	171416192	171434978	protein_coding	Ly9
746	ENSMUSG00000004709	0.920987	-17.0481	191.335	0.0891009	0.929002	NA	1	171386761	171437314	protein_coding	Cd244a
747	ENSMUSG00000004730	103.743	0.225495	0.199996	-1.12749	0.259534	0.830358	17	57665691	57790527	protein_coding	Adgre1
748	ENSMUSG00000004748	822.786	0.00725898	0.0932702	-0.0778275	0.937965	0.993944	11	4041480	4045445	protein_coding	Mtfp1
749	ENSMUSG00000004768	449.557	0.170345	0.0957535	-1.779	0.0752398	0.614652	1	33758968	33781645	protein_coding	Rab23
750	ENSMUSG00000004771	1350.03	-0.0652511	0.0688377	0.947897	0.343182	0.869769	9	64622581	64645040	protein_coding	Rab11a
751	ENSMUSG00000004788	436.539	0.105021	0.0921324	-1.13989	0.254332	0.82522	12	85266255	85273402	protein_coding	Eif2b2
752	ENSMUSG00000004789	2528.03	0.03376	0.0611277	-0.552287	0.580752	0.937297	12	85157607	85181619	protein_coding	Dlst
753	ENSMUSG00000004791	24.0629	-0.316584	0.423901	0.746834	0.455164	0.910688	12	85213409	85224564	protein_coding	Pgf
754	ENSMUSG00000004798	2194.04	0.051369	0.0713375	-0.720084	0.471473	0.915393	11	61666475	61745899	protein_coding	Ulk2
755	ENSMUSG00000004814	2.07234	0.0535211	1.07481	-0.049796	0.960285	NA	5	135598791	135601903	protein_coding	Ccl24
756	ENSMUSG00000004815	555.774	0.0487426	0.0850275	-0.573257	0.566471	0.935586	5	108794559	108817538	protein_coding	Dgkq
757	ENSMUSG00000004821	0	NA	NA	NA	NA	NA	5	108925101	108943229	protein_coding	Tmed11
758	ENSMUSG00000004837	53.6935	0.0234216	0.240615	-0.0973404	0.922456	0.99244	11	61544091	61563610	protein_coding	Grap
759	ENSMUSG00000004842	0.473098	16.6811	270.677	-0.0616272	0.95086	NA	16	65317397	65331183	protein_coding	Pou1f1
760	ENSMUSG00000004843	627.597	-0.0978426	0.0892006	1.09688	0.272693	0.837529	16	65336014	65359612	protein_coding	Chmp2b
761	ENSMUSG00000004846	474.478	-0.0561094	0.086622	0.64775	0.517147	0.922104	5	137015873	137025502	protein_coding	Plod3
762	ENSMUSG00000004849	2862.22	-0.114345	0.0892719	1.28087	0.200241	0.788344	5	137063847	137074989	protein_coding	Ap1s1
763	ENSMUSG00000004864	8.45007	-1.00016	0.713945	1.4009	0.161245	0.752841	17	28988271	28999207	protein_coding	Mapk13
764	ENSMUSG00000004865	1756.46	-0.00232673	0.0819233	0.0284013	0.977342	0.997042	17	28806622	28841683	protein_coding	Srpk1
765	ENSMUSG00000004872	0	NA	NA	NA	NA	NA	1	78077904	78173771	protein_coding	Pax3
766	ENSMUSG00000004880	164.561	0.210939	0.193009	-1.0929	0.274439	0.837914	1	181642900	181670611	protein_coding	Lbr
767	ENSMUSG00000004885	65.8542	-0.115506	0.779504	0.148178	0.882202	0.984814	3	87855973	87860683	protein_coding	Crabp2
768	ENSMUSG00000004891	200.947	-0.252859	0.170885	1.4797	0.138953	0.722516	3	87878385	87887758	protein_coding	Nes
769	ENSMUSG00000004892	5072.94	0.113604	0.0758823	-1.4971	0.134366	0.719183	3	87894838	87907537	protein_coding	Bcan
770	ENSMUSG00000004894	146.703	-0.0174898	0.479261	0.0364934	0.970889	0.99614	3	87929057	87934890	protein_coding	Hapln2
771	ENSMUSG00000004895	698.132	-0.0524683	0.0761856	0.688691	0.491018	0.916597	3	87766210	87792915	protein_coding	Prcc
772	ENSMUSG00000004896	549.451	0.125301	0.102987	-1.21667	0.223731	0.808916	3	87829908	87838024	protein_coding	Mettl25b
773	ENSMUSG00000004897	2526.48	-0.00846747	0.0615537	0.137562	0.890586	0.986515	3	87813628	87823439	protein_coding	Hdgf
774	ENSMUSG00000004902	1353.5	0.210442	0.0830142	-2.53501	0.0112444	0.286963	6	120750539	120771297	protein_coding	Slc25a18
775	ENSMUSG00000004929	594.44	-0.117505	0.107802	1.09001	0.275709	0.838625	10	80905869	80918393	protein_coding	Thop1
776	ENSMUSG00000004931	189.9	-0.0272311	0.169648	0.160515	0.872475	0.982982	10	81102794	81109080	protein_coding	Apba3
777	ENSMUSG00000004933	2489.9	-0.0146441	0.0839322	0.174475	0.861492	0.981347	10	81088769	81099199	protein_coding	Matk
778	ENSMUSG00000004934	264.29	0.155012	0.115004	-1.34789	0.177694	0.765442	10	80989100	81003757	protein_coding	Pias4
779	ENSMUSG00000004936	3528.05	0.0158439	0.0625156	-0.25344	0.799929	0.974199	9	64093052	64160913	protein_coding	Map2k1
780	ENSMUSG00000004937	2207.57	-0.0730874	0.0724066	1.0094	0.312782	0.857028	10	80879909	80896015	protein_coding	Sgta
781	ENSMUSG00000004939	2.05399	1.03015	1.30111	-0.791742	0.428511	NA	10	81034004	81037885	protein_coding	Nmrk2
782	ENSMUSG00000004945	572.138	-0.0497731	0.0839704	0.592746	0.553351	0.93088	17	5461145	5490534	protein_coding	Tmem242
783	ENSMUSG00000004947	166.268	0.0489166	0.175658	-0.278476	0.780647	0.972852	5	136023654	136061726	protein_coding	Dtx2
784	ENSMUSG00000004948	0.394327	0.367558	1.9	-0.193451	0.846606	NA	5	136008953	136017478	protein_coding	Zp3
785	ENSMUSG00000004951	41.2041	0.0830713	0.324942	-0.25565	0.798221	0.974199	5	135916773	135918417	protein_coding	Hspb1
786	ENSMUSG00000004952	114.505	-0.00713331	0.168326	0.0423779	0.966197	0.99584	5	136112770	136140714	protein_coding	Rasa4
787	ENSMUSG00000004961	2055.46	-0.23006	0.0982247	2.34219	0.0191712	0.364051	7	4542764	4550540	protein_coding	Syt5
788	ENSMUSG00000004980	5394.94	0.0223091	0.0574861	-0.388079	0.697958	0.964109	6	51437912	51446874	protein_coding	Hnrnpa2b1
789	ENSMUSG00000004988	12.3226	-0.851144	0.453795	1.87561	0.0607086	0.570358	6	117910520	117914653	protein_coding	Fxyd4
790	ENSMUSG00000004994	210.776	0.25873	0.142195	-1.81954	0.0688286	0.597935	8	84984424	84997009	protein_coding	Yju2b
791	ENSMUSG00000004996	257.546	-0.00783515	0.129504	0.0605011	0.951757	0.995659	8	84976535	84983955	protein_coding	Mri1
792	ENSMUSG00000005034	9748.57	-0.0842249	0.0552496	1.52444	0.127398	0.707903	3	146435329	146518745	protein_coding	Prkacb
793	ENSMUSG00000005043	117.122	-0.29006	0.174093	1.66612	0.0956896	0.659493	11	119234251	119246362	protein_coding	Sgsh
794	ENSMUSG00000005045	6491.25	-0.242453	0.0725223	3.34315	0.000828324	0.0682462	4	152423108	152474651	protein_coding	Chd5
795	ENSMUSG00000005054	243.414	0.0150632	0.119968	-0.12556	0.90008	0.989707	10	78261503	78263456	protein_coding	Cstb
796	ENSMUSG00000005057	83.6428	0.228033	0.224553	-1.01549	0.30987	0.855313	5	136247001	136275410	protein_coding	Sh2b2
797	ENSMUSG00000005069	925.572	-0.0939001	0.0781615	1.20136	0.229612	0.810307	6	124373775	124392026	protein_coding	Pex5
798	ENSMUSG00000005078	661.854	0.0193905	0.0837011	-0.231663	0.8168	0.97554	12	72132363	72148235	protein_coding	Jkamp
799	ENSMUSG00000005087	24.8549	0.569313	0.434295	-1.31089	0.189894	0.779706	2	102641486	102732010	protein_coding	Cd44
800	ENSMUSG00000005089	63553.4	0.0877631	0.0833019	-1.05355	0.292087	0.845334	2	102489004	102621129	protein_coding	Slc1a2
801	ENSMUSG00000005102	531.31	0.00454275	0.0914903	-0.0496528	0.960399	0.99584	2	118219099	118305715	protein_coding	Eif2ak4
802	ENSMUSG00000005103	2145.43	-0.145048	0.0732665	1.97973	0.0477341	0.524535	5	38684156	38720564	protein_coding	Wdr1
803	ENSMUSG00000005107	16.2459	0.145325	0.536503	-0.270875	0.786487	0.973354	5	38506616	38660486	protein_coding	Slc2a9
804	ENSMUSG00000005124	85.0981	0.962964	0.265158	-3.63167	0.000281596	0.0312713	15	66763169	66795050	protein_coding	Ccn4
805	ENSMUSG00000005125	883.367	-0.054123	0.121753	0.444531	0.656659	0.954423	15	66801167	66841489	protein_coding	Ndrg1
806	ENSMUSG00000005131	8.01731	-0.36682	0.709778	0.51681	0.605289	0.944561	9	53313625	53345702	protein_coding	4930550C14Rik
807	ENSMUSG00000005142	922.831	-0.0118554	0.0690677	0.171649	0.863714	0.982002	8	85809899	85824911	protein_coding	Man2b1
808	ENSMUSG00000005148	143.295	-0.313241	0.151969	2.06121	0.0392826	0.497597	14	99536127	99552472	protein_coding	Klf5
809	ENSMUSG00000005150	334.531	-0.0533096	0.112908	0.472151	0.636819	0.949948	8	85801664	85807935	protein_coding	Wdr83
810	ENSMUSG00000005161	2010	0.0276546	0.0705323	-0.392084	0.694996	0.963353	8	85696216	85701463	protein_coding	Prdx2
811	ENSMUSG00000005198	1973.53	0.0236368	0.089498	-0.264104	0.7917	0.974199	11	69624823	69649463	protein_coding	Polr2a
812	ENSMUSG00000005202	0.557109	16.8358	269.637	-0.0624387	0.950213	NA	11	69505630	69508731	protein_coding	Shbg
813	ENSMUSG00000005204	1342.4	-0.0732131	0.0690661	1.06005	0.289124	0.844943	11	69563941	69572910	protein_coding	Senp3
814	ENSMUSG00000005220	2.43696	0.471312	1.12685	-0.418256	0.67576	NA	5	72457368	72661816	protein_coding	Corin
815	ENSMUSG00000005225	350.683	0.210842	0.104541	-2.01684	0.0437123	0.514698	6	54572096	54622824	protein_coding	Plekha8
816	ENSMUSG00000005232	0	NA	NA	NA	NA	NA	2	69041417	69058185	protein_coding	G6pc2
817	ENSMUSG00000005233	4.04854	1.50485	0.868393	-1.73291	0.0831119	NA	2	69024239	69036538	protein_coding	Spc25
818	ENSMUSG00000005237	47.0142	0.0338222	0.337169	-0.100312	0.920096	0.99244	11	69311635	69439936	protein_coding	Dnah2
819	ENSMUSG00000005251	4.31396	-0.175356	0.771014	0.227435	0.820086	NA	16	97543133	97564987	protein_coding	Ripk4
820	ENSMUSG00000005262	1212.97	-0.0920254	0.0645253	1.42619	0.153813	0.745917	16	18630529	18654011	protein_coding	Ufd1
821	ENSMUSG00000005267	302.413	0.0740586	0.115646	-0.640391	0.521919	0.923692	11	62591182	62622731	protein_coding	Zfp287
822	ENSMUSG00000005268	27.0156	0.772171	0.483731	-1.59628	0.110426	0.683515	15	10177324	10349266	protein_coding	Prlr
823	ENSMUSG00000005299	1653.75	-0.044698	0.0663406	0.673765	0.500461	0.918762	5	33897017	33940161	protein_coding	Letm1
824	ENSMUSG00000005312	3263.45	0.0300595	0.0670014	-0.44864	0.653691	0.953243	13	58323970	58363467	protein_coding	Ubqln1
825	ENSMUSG00000005320	4.01219	0.30296	1.00938	-0.300145	0.764066	NA	13	55300453	55316572	protein_coding	Fgfr4
826	ENSMUSG00000005338	9973.1	0.0200282	0.0646451	-0.309817	0.7567	0.968346	1	173160825	173195261	protein_coding	Cadm3
827	ENSMUSG00000005339	0.355554	16.3051	273.279	-0.0596647	0.952423	NA	1	173048851	173054781	protein_coding	Fcer1a
828	ENSMUSG00000005354	1727.26	-0.04832	0.079181	0.610247	0.541698	0.927883	15	77799247	77813206	protein_coding	Txn2
829	ENSMUSG00000005355	0	NA	NA	NA	NA	NA	10	78547825	78554128	protein_coding	Casp14
830	ENSMUSG00000005357	150.239	0.341584	0.151351	-2.2569	0.0240142	0.412469	10	78616330	78650599	protein_coding	Slc1a6
831	ENSMUSG00000005360	9651.31	0.147036	0.102378	-1.4362	0.150946	0.738982	15	8663608	8740248	protein_coding	Slc1a3
832	ENSMUSG00000005362	956.991	-0.0292824	0.0965842	0.30318	0.761753	0.969208	6	106757162	106777038	protein_coding	Crbn
833	ENSMUSG00000005364	0.892125	-1.49272	1.60597	0.929482	0.352639	NA	6	106687318	106725998	protein_coding	Il5ra
834	ENSMUSG00000005370	356.01	0.143924	0.0972753	-1.47956	0.138991	0.722516	17	88282490	88298320	protein_coding	Msh6
835	ENSMUSG00000005371	2251.94	-0.0126075	0.0599647	0.210248	0.833474	0.976414	17	88298287	88372719	protein_coding	Fbxo11
836	ENSMUSG00000005373	66.0008	-0.211938	0.265047	0.799622	0.42393	0.899932	5	135118744	135167236	protein_coding	Mlxipl
837	ENSMUSG00000005374	558.62	-0.0408398	0.081441	0.501464	0.616044	0.947466	5	135178511	135194614	protein_coding	Tbl2
838	ENSMUSG00000005378	403.309	-0.0111374	0.0965249	0.115383	0.908141	0.990686	5	135081811	135093813	protein_coding	Bud23
839	ENSMUSG00000005397	148.686	-0.378712	0.528859	0.716093	0.473934	0.916062	13	13612136	13686854	protein_coding	Nid1
840	ENSMUSG00000005410	122.915	-0.0419389	0.163132	0.257086	0.797113	0.974199	8	75836197	75855067	protein_coding	Mcm5
841	ENSMUSG00000005413	84.0894	0.136449	0.194552	-0.70135	0.483085	0.916489	8	75820249	75827217	protein_coding	Hmox1
842	ENSMUSG00000005417	6819.24	-0.00936908	0.059783	0.156718	0.875467	0.983718	11	59552131	59671686	protein_coding	Mprip
843	ENSMUSG00000005442	4013.18	-0.0828623	0.0845976	0.979488	0.327339	0.864683	7	24967129	24993584	protein_coding	Cic
844	ENSMUSG00000005447	132.551	-0.0711113	0.190958	0.372392	0.709601	0.96478	7	24994474	24997411	protein_coding	Pafah1b3
845	ENSMUSG00000005465	3.71812	-0.617317	0.889959	0.693647	0.487904	NA	8	84756923	84769218	protein_coding	Il27ra
846	ENSMUSG00000005469	3129.32	-0.0616069	0.0585685	1.05188	0.292856	0.845955	8	84699622	84723072	protein_coding	Prkaca
847	ENSMUSG00000005470	14.616	-0.198927	0.491946	0.404368	0.685942	0.960878	8	84682136	84696826	protein_coding	Asf1b
848	ENSMUSG00000005474	0	NA	NA	NA	NA	NA	5	136722000	136729948	protein_coding	Myl10
849	ENSMUSG00000005481	225.851	-0.0487968	0.141066	0.345915	0.729407	0.96526	8	84441806	84453521	protein_coding	Ddx39a
850	ENSMUSG00000005483	945.659	0.0736108	0.0742274	-0.991694	0.321347	0.860415	8	84334822	84339282	protein_coding	Dnajb1
851	ENSMUSG00000005493	1.1381	-1.28125	1.3332	0.961033	0.336536	NA	3	153562786	153611775	protein_coding	Msh4
852	ENSMUSG00000005501	462.959	0.141905	0.127705	-1.1112	0.266482	0.833435	1	87872841	87936273	protein_coding	Usp40
853	ENSMUSG00000005503	0.306785	-15.9988	193.804	0.0825512	0.934208	NA	6	52290483	52295363	protein_coding	Evx1
854	ENSMUSG00000005505	138.479	-0.123109	0.155028	0.794114	0.427129	0.899949	2	90735084	90741970	protein_coding	Kbtbd4
855	ENSMUSG00000005506	4783.24	0.0186658	0.0610933	-0.305529	0.759963	0.969208	2	90770727	90849842	protein_coding	Celf1
856	ENSMUSG00000005510	1150.04	0.0153911	0.0653205	-0.235625	0.813724	0.975455	2	90724978	90735171	protein_coding	Ndufs3
857	ENSMUSG00000005514	1204.12	0.026813	0.0929948	-0.288328	0.773096	0.971985	5	135698887	135764180	protein_coding	Por
858	ENSMUSG00000005533	1805.25	-0.0724525	0.0710805	1.0193	0.308059	0.855118	7	67602575	67883416	protein_coding	Igf1r
859	ENSMUSG00000005534	1195.14	-0.0320978	0.0665727	0.482147	0.629701	0.949655	8	3172061	3329617	protein_coding	Insr
860	ENSMUSG00000005540	35.1864	0.350219	0.303034	-1.15571	0.247799	0.821515	8	3731737	3744175	protein_coding	Fcer2a
861	ENSMUSG00000005547	0.278555	15.8056	276.853	-0.0570902	0.954473	NA	7	26534730	26542973	protein_coding	Cyp2a5
862	ENSMUSG00000005553	12.6562	0.33412	0.448999	-0.744145	0.456789	0.911416	7	30411634	30424959	protein_coding	Atp4a
863	ENSMUSG00000005566	2035.35	0.0331973	0.0600874	-0.552483	0.580617	0.937297	7	12733041	12764962	protein_coding	Trim28
864	ENSMUSG00000005575	2044.58	-0.10598	0.0641996	1.65079	0.098781	0.663437	7	12769047	12772202	protein_coding	Ube2m
865	ENSMUSG00000005580	1575.07	-0.0319197	0.0657892	0.485182	0.627547	0.949217	16	4105393	4238362	protein_coding	Adcy9
866	ENSMUSG00000005583	17565.1	0.0180584	0.0758767	-0.237996	0.811884	0.975415	13	83652153	83815199	protein_coding	Mef2c
867	ENSMUSG00000005609	933.604	0.0481303	0.0744565	-0.646421	0.518007	0.922171	7	110628158	110655584	protein_coding	Ctr9
868	ENSMUSG00000005610	11057.9	0.000949675	0.0616383	-0.0154072	0.987707	0.998489	7	110666957	110682237	protein_coding	Eif4g2
869	ENSMUSG00000005611	58.9243	-0.114235	0.250971	0.455171	0.648986	0.952907	7	110467473	110581668	protein_coding	Irag1
870	ENSMUSG00000005615	650.867	0.015213	0.0949489	-0.160223	0.872706	0.983008	16	32249739	32293888	protein_coding	Pcyt1a
871	ENSMUSG00000005621	693.697	0.0952793	0.0766646	-1.24281	0.213939	0.801851	7	80643429	80694912	protein_coding	Zfp592
872	ENSMUSG00000005625	1374.87	0.0169578	0.0703319	-0.241111	0.809469	0.975169	3	94940005	94949925	protein_coding	Psmd4
873	ENSMUSG00000005628	7.22588	-0.236834	0.581211	0.407484	0.683652	NA	3	95031787	95036520	protein_coding	Tmod4
874	ENSMUSG00000005640	15.4754	-0.348664	0.521633	0.66841	0.503872	0.919738	3	87704258	87723408	protein_coding	Insrr
875	ENSMUSG00000005649	1.34561	-0.574424	1.30564	0.439957	0.659968	NA	7	13132057	13142812	protein_coding	Cabp5
876	ENSMUSG00000005656	487.336	-0.0233792	0.0931694	0.250932	0.801867	0.974306	12	54793134	54842488	protein_coding	Snx6
877	ENSMUSG00000005667	128.495	-0.123578	0.159161	0.776437	0.437491	0.905375	6	83282673	83302890	protein_coding	Mthfd2
878	ENSMUSG00000005672	954.461	-0.0607124	0.26453	0.22951	0.818472	0.97554	5	75735576	75817382	protein_coding	Kit
879	ENSMUSG00000005674	265.624	-0.0915026	0.116358	0.786389	0.431639	0.90124	1	171043580	171050083	protein_coding	Tomm40l
880	ENSMUSG00000005677	1.48262	0.870388	1.27137	-0.684608	0.493591	NA	1	171041539	171048270	protein_coding	Nr1i3
881	ENSMUSG00000005681	6.64578	0.376645	0.814353	-0.462508	0.643717	NA	1	171052623	171053948	protein_coding	Apoa2
882	ENSMUSG00000005682	587.137	0.117738	0.0895975	-1.31408	0.18882	0.778062	10	128139204	128157227	protein_coding	Pan2
883	ENSMUSG00000005683	5085.42	0.0546897	0.0669648	-0.816693	0.414104	0.898454	10	128173603	128198348	protein_coding	Cs
884	ENSMUSG00000005686	425.981	0.0996558	0.102804	-0.969379	0.332356	0.865115	7	110367413	110411612	protein_coding	Ampd3
885	ENSMUSG00000005687	785.572	0.0793655	0.0756269	-1.04944	0.293978	0.84658	3	103078971	103086482	protein_coding	Bcas2
886	ENSMUSG00000005696	0.148856	-15.0549	196.106	0.0767694	0.938807	NA	X	41591330	41618207	protein_coding	Sh2d1a
887	ENSMUSG00000005698	1208.85	0.0250378	0.0690985	-0.362349	0.717091	0.96478	8	106363200	106409554	protein_coding	Ctcf
888	ENSMUSG00000005699	330.207	-0.0487602	0.111643	0.436753	0.662291	0.954555	8	106427780	106430128	protein_coding	Pard6a
889	ENSMUSG00000005705	19.0101	0.611116	0.372891	-1.63886	0.101242	0.669684	8	106293330	106364025	protein_coding	Agrp
890	ENSMUSG00000005716	1286.05	0.260971	0.32905	-0.793106	0.427716	0.899949	15	78075314	78090600	protein_coding	Pvalb
891	ENSMUSG00000005718	43.4321	0.180308	0.265473	-0.679196	0.497014	0.917865	16	4362525	4377718	protein_coding	Tfap4
892	ENSMUSG00000005732	307.018	0.0823477	0.108985	-0.755588	0.449896	0.909441	16	18057648	18066596	protein_coding	Ranbp1
893	ENSMUSG00000005763	2.08171	-0.00746796	1.1083	0.00673819	0.994624	NA	1	165616250	165704846	protein_coding	Cd247
894	ENSMUSG00000005774	340.853	0.123642	0.121299	-1.01931	0.308055	0.855118	3	94861386	94868872	protein_coding	Rfx5
895	ENSMUSG00000005779	1270.47	0.0164952	0.0680532	-0.242386	0.808481	0.975169	3	94791404	94794272	protein_coding	Psmb4
896	ENSMUSG00000005800	0	NA	NA	NA	NA	NA	9	7558457	7568486	protein_coding	Mmp8
897	ENSMUSG00000005802	1744.22	0.109101	0.102188	-1.06764	0.285681	0.843971	2	122523153	122544583	protein_coding	Slc30a4
898	ENSMUSG00000005803	71.5679	0.499769	0.274125	-1.82314	0.0682825	0.595389	2	122607157	122651489	protein_coding	Sqor
899	ENSMUSG00000005804	478.939	-0.121471	0.0902157	1.34645	0.178156	0.766158	2	122580423	122591395	protein_coding	Bloc1s6
900	ENSMUSG00000005813	690.934	-0.0681819	0.0875352	0.778908	0.436034	0.904493	3	138164717	138195276	protein_coding	Metap1
901	ENSMUSG00000005823	437.518	0.0413483	0.0893882	-0.46257	0.643672	0.952107	17	57541635	57555446	protein_coding	Gpr108
902	ENSMUSG00000005824	0	NA	NA	NA	NA	NA	17	57496492	57501177	protein_coding	Tnfsf14
903	ENSMUSG00000005836	2.2698	-0.295371	1.08562	0.272077	0.785563	NA	18	11052064	11085635	protein_coding	Gata6
904	ENSMUSG00000005846	756.992	-0.0167981	0.0835229	0.20112	0.840605	0.977756	16	11010834	11021195	protein_coding	Rsl1d1
905	ENSMUSG00000005864	13.2061	0.205924	0.449323	-0.458298	0.646738	0.952656	X	71035455	71053824	protein_coding	Cnga2
906	ENSMUSG00000005871	8865.07	0.0107864	0.0629436	-0.171367	0.863936	0.982071	18	34353977	34455605	protein_coding	Apc
907	ENSMUSG00000005873	6891.11	0.0239	0.0603209	-0.396215	0.691947	0.962493	18	34477938	34507123	protein_coding	Reep5
908	ENSMUSG00000005881	1435.9	0.0663481	0.0613049	-1.08226	0.279135	0.841348	2	155849965	155860199	protein_coding	Ergic3
909	ENSMUSG00000005882	916.344	0.0317061	0.0866103	-0.366077	0.714308	0.96478	2	155688814	155772230	protein_coding	Uqcc1
910	ENSMUSG00000005883	12.7983	0.824635	0.462941	-1.7813	0.0748642	0.613115	2	172819493	172835369	protein_coding	Spo11
911	ENSMUSG00000005886	2426.15	0.0352862	0.0583163	-0.605083	0.545124	0.929214	1	13209329	13444307	protein_coding	Ncoa2
912	ENSMUSG00000005891	0	NA	NA	NA	NA	NA	13	28200195	28207542	protein_coding	Prl4a1
913	ENSMUSG00000005892	60.2558	1.18346	0.766565	-1.54385	0.122625	0.700474	6	92219042	92221631	protein_coding	Trh
914	ENSMUSG00000005893	1459.83	0.0313762	0.0682508	-0.459719	0.645718	0.95235	6	92068371	92151275	protein_coding	Nr2c2
915	ENSMUSG00000005897	193.802	0.0444891	0.169915	-0.261832	0.793451	0.974199	10	93983885	94033073	protein_coding	Nr2c1
916	ENSMUSG00000005899	1584.78	0.0020163	0.0757311	-0.0266244	0.978759	0.997181	16	17437218	17462692	protein_coding	Smpd4
917	ENSMUSG00000005907	429.4	0.0296762	0.0899116	-0.33006	0.741355	0.965913	5	3646066	3687232	protein_coding	Pex1
918	ENSMUSG00000005917	94.4706	-0.711156	0.272457	2.61016	0.00904995	0.261557	11	21944764	21952897	protein_coding	Otx1
919	ENSMUSG00000005936	1131.82	-0.118561	0.0689293	1.72003	0.0854266	0.639267	17	29170924	29188523	protein_coding	Kctd20
920	ENSMUSG00000005947	7.49871	0.0642399	0.635218	-0.10113	0.919447	NA	11	72981409	73038272	protein_coding	Itgae
921	ENSMUSG00000005949	356.852	-0.00566906	0.108234	0.052378	0.958228	0.99584	11	73074422	73089868	protein_coding	Ctns
922	ENSMUSG00000005950	10.0949	0.558463	0.515019	-1.08435	0.278208	0.840324	11	73051247	73063511	protein_coding	P2rx5
923	ENSMUSG00000005951	65.9265	-0.0448049	0.255624	0.175277	0.860862	0.981234	11	73090286	73115337	protein_coding	Shpk
924	ENSMUSG00000005952	2.8803	-0.646584	1.20419	0.536946	0.591305	NA	11	73125118	73152068	protein_coding	Trpv1
925	ENSMUSG00000005958	635.423	0.109116	0.078621	-1.38787	0.165175	0.75775	16	21023505	21042055	protein_coding	Ephb3
926	ENSMUSG00000005968	32.671	-0.0015153	0.362206	0.00418353	0.996662	0.999651	3	94520064	94566179	protein_coding	Tuft1
927	ENSMUSG00000005973	288.558	0.318498	0.208789	-1.52546	0.127146	0.707758	2	105216636	105229664	protein_coding	Rcn1
928	ENSMUSG00000005980	88.4574	0.0829357	0.228925	-0.362284	0.71714	0.96478	16	3854806	3857888	protein_coding	Dnase1
929	ENSMUSG00000005981	1119.59	0.0107978	0.06612	-0.163307	0.870277	0.98268	16	3857835	3895691	protein_coding	Trap1
930	ENSMUSG00000005982	1207.03	-0.0533191	0.0740963	0.719592	0.471776	0.915393	16	3690239	3722634	protein_coding	Naa60
931	ENSMUSG00000005983	66.3242	0.0228595	0.218654	-0.104547	0.916736	0.99196	16	3713043	3726553	protein_coding	1700037C18Rik
932	ENSMUSG00000005986	1100.32	0.0599139	0.0794572	-0.754041	0.450825	0.9095	19	4320208	4333165	protein_coding	Ankrd13d
933	ENSMUSG00000005994	0.120467	14.8684	283.949	-0.0523627	0.95824	NA	4	80752360	80769956	protein_coding	Tyrp1
934	ENSMUSG00000006005	2008.88	-0.0148691	0.0647554	0.22962	0.818387	0.97554	1	150268589	150325686	protein_coding	Tpr
935	ENSMUSG00000006007	0.120467	14.8684	283.949	-0.0523627	0.95824	NA	1	150195168	150209657	protein_coding	Pdc
936	ENSMUSG00000006010	804.881	0.0204365	0.0815789	-0.250512	0.802191	0.974306	1	150237056	150268831	protein_coding	Odr4
937	ENSMUSG00000006014	283.582	-0.259235	0.799855	0.324102	0.745861	0.966213	1	150325163	150341916	protein_coding	Prg4
938	ENSMUSG00000006019	171.777	0.297558	0.165947	-1.79309	0.0729593	0.609386	7	15931072	15955962	protein_coding	Dhx34
939	ENSMUSG00000006021	272.076	-0.192644	0.112245	1.71628	0.0861099	0.641537	7	15853820	15861441	protein_coding	Kptn
940	ENSMUSG00000006024	5462.09	-0.0454527	0.0593036	0.76644	0.443414	0.908912	7	15832383	15851900	protein_coding	Napa
941	ENSMUSG00000006050	419.905	0.0197911	0.0908393	-0.21787	0.827531	0.976071	18	36799734	36803868	protein_coding	Sra1
942	ENSMUSG00000006056	0	NA	NA	NA	NA	NA	11	95990152	96002790	protein_coding	Calcoco2
943	ENSMUSG00000006057	1384.25	-0.11624	0.0897097	1.29574	0.195066	0.785974	11	95959678	95966496	protein_coding	Atp5mc1
944	ENSMUSG00000006058	750.619	-0.0287417	0.0747936	0.384281	0.70077	0.964328	11	95925711	95938256	protein_coding	Snf8
945	ENSMUSG00000006095	815.929	-0.00178075	0.0735952	0.0241965	0.980696	0.997277	7	29923556	29931697	protein_coding	Tbcb
946	ENSMUSG00000006127	859.108	0.00992754	0.0885957	-0.112055	0.91078	0.990686	11	75521814	75539697	protein_coding	Inpp5k
947	ENSMUSG00000006134	941.506	0.0536212	0.0737513	-0.727055	0.467193	0.914593	16	17269851	17305298	protein_coding	Crkl
948	ENSMUSG00000006143	1.19787	2.46014	1.93756	-1.26971	0.204189	NA	5	136083346	136093180	protein_coding	Upk3bl
949	ENSMUSG00000006154	225.681	0.0410758	0.165536	-0.248138	0.804027	0.974743	7	4463673	4483486	protein_coding	Eps8l1
950	ENSMUSG00000006169	917.879	0.0819879	0.0767729	-1.06793	0.285554	0.843971	11	45742791	45801452	protein_coding	Clint1
951	ENSMUSG00000006179	20.6808	-0.294096	0.355761	0.826666	0.408427	0.896672	13	22186343	22193912	protein_coding	Prss16
952	ENSMUSG00000006191	168.348	0.00805506	0.142593	-0.0564898	0.954952	0.995659	13	29375729	30039657	protein_coding	Cdkal1
953	ENSMUSG00000006200	0	NA	NA	NA	NA	NA	X	36915787	36918734	protein_coding	Rhox6
954	ENSMUSG00000006204	0.153393	-15.0572	196.1	0.076783	0.938796	NA	7	130776131	130908180	protein_coding	Cdcp3
955	ENSMUSG00000006205	2150.63	0.360242	0.0688787	-5.23009	1.69e-07	0.000110798	7	130537841	130587390	protein_coding	Htra1
956	ENSMUSG00000006215	679.033	-0.122554	0.111691	1.09726	0.272528	0.837457	4	141171965	141195241	protein_coding	Zbtb17
957	ENSMUSG00000006216	0.117544	14.8675	283.956	-0.0523583	0.958243	NA	4	141131664	141143325	protein_coding	Clcnkb
958	ENSMUSG00000006218	24.3611	-0.476604	0.439437	1.08458	0.278108	0.840324	4	141095531	141111486	protein_coding	Fam131c
959	ENSMUSG00000006219	19.521	0.638301	0.622474	-1.02543	0.305162	0.855118	4	141303373	141333407	protein_coding	Fblim1
960	ENSMUSG00000006221	10.277	-0.2901	0.498518	0.581925	0.560617	0.933267	4	141148090	141152622	protein_coding	Hspb7
961	ENSMUSG00000006235	105.511	-0.17771	0.19843	0.895581	0.370477	0.881919	9	21870193	21874802	protein_coding	Epor
962	ENSMUSG00000006241	248.698	0.107403	0.119198	-0.90105	0.367562	0.881126	9	21838767	21847168	protein_coding	Ccdc159
963	ENSMUSG00000006262	556.317	-0.0129526	0.115394	0.112247	0.910628	0.990686	5	88868714	88912079	protein_coding	Mob1b
964	ENSMUSG00000006269	1.9653	0.885261	1.10198	-0.803337	0.42178	NA	6	83719972	83735837	protein_coding	Atp6v1b1
965	ENSMUSG00000006270	10.0922	0.0637222	0.576088	-0.110612	0.911924	0.99071	19	59154619	59158488	protein_coding	Vax1
966	ENSMUSG00000006273	10728.4	-0.115464	0.0682743	1.69117	0.0908036	0.649288	8	69541298	69566363	protein_coding	Atp6v1b2
967	ENSMUSG00000006276	1430.87	-4.66e-05	0.0716975	0.000649664	0.999482	0.999651	8	73094839	73175304	protein_coding	Eps15l1
968	ENSMUSG00000006281	176.376	0.11275	0.139614	-0.807586	0.419329	0.899865	14	51061516	51108017	protein_coding	Tep1
969	ENSMUSG00000006288	601.07	-0.00168789	0.0889381	0.0189783	0.984858	0.997743	14	51002872	51022976	protein_coding	Ttc5
970	ENSMUSG00000006289	317.838	0.0197418	0.102528	-0.19255	0.847311	0.979542	14	51143935	51162350	protein_coding	Osgep
971	ENSMUSG00000006299	1657.93	0.000107706	0.0641672	-0.00167852	0.998661	0.999651	1	74318999	74323897	protein_coding	Aamp
972	ENSMUSG00000006301	485.676	0.0253997	0.104991	-0.241923	0.80884	0.975169	1	74327406	74344781	protein_coding	Tmbim1
973	ENSMUSG00000006304	2538.3	-0.0263682	0.0739278	0.356675	0.721335	0.964829	1	74275243	74307368	protein_coding	Arpc2
974	ENSMUSG00000006307	1652.41	0.0274775	0.0845032	-0.325165	0.745056	0.966213	7	30268283	30288151	protein_coding	Kmt2b
975	ENSMUSG00000006310	39.803	0.588912	0.276604	-2.12908	0.0332476	0.473166	7	30289106	30298334	protein_coding	Zbtb32
976	ENSMUSG00000006311	0.120467	14.8684	283.949	-0.0523627	0.95824	NA	7	30333041	30335277	protein_coding	Etv2
977	ENSMUSG00000006313	13.9935	0.435517	0.46621	-0.934166	0.350218	0.873913	7	30302517	30312272	protein_coding	Upk1a
978	ENSMUSG00000006315	690.75	-0.0378113	0.0921791	0.410193	0.681664	0.959701	7	30427126	30428965	protein_coding	Tmem147
979	ENSMUSG00000006333	2118.88	0.0672243	0.0725165	-0.927021	0.353916	0.876949	7	3706992	3709896	protein_coding	Rps9
980	ENSMUSG00000006335	249.589	-0.201815	0.118635	1.70114	0.0889162	0.649258	7	3623323	3632928	protein_coding	Tfpt
981	ENSMUSG00000006342	242.485	-0.256784	0.16294	1.57594	0.11504	0.688061	10	75472540	75479842	protein_coding	Susd2
982	ENSMUSG00000006344	41.2073	-0.118041	0.345063	0.342087	0.732285	0.96526	10	75425174	75453034	protein_coding	Ggt5
983	ENSMUSG00000006345	25.1147	-0.189948	0.378245	0.502181	0.61554	0.947449	10	75397438	75422034	protein_coding	Ggt1
984	ENSMUSG00000006356	1702.58	-0.440267	0.30874	1.42601	0.153864	0.74596	12	113103856	113109126	protein_coding	Crip2
985	ENSMUSG00000006360	59.366	0.153641	0.309632	-0.496207	0.619749	0.947712	12	113109936	113117499	protein_coding	Crip1
986	ENSMUSG00000006362	406.739	-0.310555	0.110049	2.82197	0.00477292	0.180076	8	123351880	123425848	protein_coding	Cbfa2t3
987	ENSMUSG00000006369	195.048	-0.474606	0.631118	0.752009	0.452046	0.909678	15	85090150	85170736	protein_coding	Fbln1
988	ENSMUSG00000006373	2455.35	-0.117914	0.0958951	1.22961	0.218843	0.805528	X	35861859	35869732	protein_coding	Pgrmc1
989	ENSMUSG00000006378	23.6121	0.505402	0.342968	-1.47361	0.140586	0.725946	15	78915074	78922553	protein_coding	Gcat
990	ENSMUSG00000006386	253.237	0.233444	0.168239	-1.38758	0.165266	0.75775	4	94627526	94763213	protein_coding	Tek
991	ENSMUSG00000006389	47.5202	-0.248049	0.271492	0.91365	0.360901	0.879219	4	118299612	118314710	protein_coding	Mpl
992	ENSMUSG00000006390	241.806	-0.00170645	0.138212	0.0123466	0.990149	0.999189	4	118285290	118290150	protein_coding	Elovl1
993	ENSMUSG00000006392	422.596	0.0747979	0.0904751	-0.826724	0.408394	0.896672	4	118266534	118272979	protein_coding	Med8
994	ENSMUSG00000006395	161.013	-0.155865	0.158135	0.985646	0.324307	0.862695	4	118217187	118219941	protein_coding	Hyi
995	ENSMUSG00000006398	12.8437	0.346158	0.455638	-0.759721	0.447421	0.90941	4	118290098	118294549	protein_coding	Cdc20
996	ENSMUSG00000006403	223.779	-0.426422	0.234946	1.81498	0.0695271	0.598418	1	171077990	171088206	protein_coding	Adamts4
997	ENSMUSG00000006411	156.963	0.211144	0.170992	-1.23481	0.2169	0.804307	1	171197667	171216166	protein_coding	Nectin4
998	ENSMUSG00000006412	959.854	-0.0610754	0.0887497	0.688176	0.491342	0.916597	1	171173238	171186822	protein_coding	Pfdn2
999	ENSMUSG00000006418	869.509	0.0512693	0.0739485	-0.693311	0.488114	0.916489	2	167334565	167358093	protein_coding	Rnf114
1000	ENSMUSG00000006423	701.684	0.0653856	0.0804397	-0.812852	0.416303	0.898454	X	36087390	36137764	protein_coding	Steep1
1001	ENSMUSG00000006435	2841.74	-0.0674132	0.133788	0.503881	0.614345	0.946966	19	47167259	47247880	protein_coding	Neurl1a
1002	ENSMUSG00000006442	633.426	-0.115724	0.0838997	1.37931	0.167798	0.759101	4	148675960	148679450	protein_coding	Srm
1003	ENSMUSG00000006445	19.1903	0.375611	0.448966	-0.836613	0.40281	0.895681	4	141028551	141056695	protein_coding	Epha2
1004	ENSMUSG00000006456	301.673	-0.00232884	0.116519	0.0199868	0.984054	0.997556	19	4850597	4861662	protein_coding	Rbm14
1005	ENSMUSG00000006457	25.3531	0.0200707	0.368888	-0.0544087	0.95661	0.995752	19	4911244	4927937	protein_coding	Actn3
1006	ENSMUSG00000006462	1.33342	17.9752	262.255	-0.0685411	0.945355	NA	2	167532548	167584184	lncRNA	A530013C23Rik
1007	ENSMUSG00000006463	387.625	-0.118376	0.0935088	1.26593	0.205537	0.79402	19	4928696	4935425	protein_coding	Zdhhc24
1008	ENSMUSG00000006464	1002.88	-0.147308	0.0812021	1.81409	0.0696642	0.598418	19	4936906	4956656	protein_coding	Bbs1
1009	ENSMUSG00000006469	0.816363	0.552003	1.99456	-0.276755	0.781969	NA	2	25118910	25124376	protein_coding	Slc34a3
1010	ENSMUSG00000006471	193.418	-0.0110524	0.151322	0.0730389	0.941775	0.994636	2	25134833	25146034	protein_coding	Ndor1
1011	ENSMUSG00000006476	7062.34	-0.185167	0.0673891	2.74773	0.00600103	0.208583	2	24944367	24952893	protein_coding	Nsmf
1012	ENSMUSG00000006488	0	NA	NA	NA	NA	NA	13	27817349	27826476	protein_coding	Prl7a1
1013	ENSMUSG00000006490	0	NA	NA	NA	NA	NA	13	27741978	27748589	protein_coding	Prl8a9
1014	ENSMUSG00000006494	1475.02	0.0286028	0.0842286	-0.339586	0.734169	0.96526	2	71703568	71734202	protein_coding	Pdk1
1015	ENSMUSG00000006498	427.077	-0.0676925	0.114771	0.589807	0.55532	0.931409	10	79690261	79700605	protein_coding	Ptbp1
1016	ENSMUSG00000006517	321.166	0.155415	0.109994	-1.41294	0.157672	0.752078	8	123160340	123170161	protein_coding	Mvd
1017	ENSMUSG00000006519	60.4069	0.0214277	0.229725	-0.0932755	0.925685	0.992822	8	123151515	123159669	protein_coding	Cyba
1018	ENSMUSG00000006522	571.773	0.550155	0.102392	-5.37301	7.74e-08	6.51e-05	14	30630529	30645717	protein_coding	Itih3
1019	ENSMUSG00000006526	483.535	0.0585106	0.0918855	-0.636777	0.52427	0.925587	14	30547547	30599167	protein_coding	Stimate
1020	ENSMUSG00000006527	781.326	0.0224979	0.102468	-0.21956	0.826214	0.976071	14	30436806	30544678	protein_coding	Sfmbt1
1021	ENSMUSG00000006529	0	NA	NA	NA	NA	NA	14	30651137	30665246	protein_coding	Itih1
1022	ENSMUSG00000006538	5.09296	0.168975	0.769687	-0.219537	0.826232	NA	1	74984474	74990831	protein_coding	Ihh
1023	ENSMUSG00000006542	0.945936	-0.165161	1.3799	0.11969	0.904728	NA	1	74778081	74788380	protein_coding	Prkag3
1024	ENSMUSG00000006546	8.74832	-0.175824	0.7369	0.238599	0.811416	0.975415	1	74929093	74932302	protein_coding	Cryba2
1025	ENSMUSG00000006567	67.676	0.168852	0.241843	-0.698191	0.485058	0.916489	8	22482801	22550321	protein_coding	Atp7b
1026	ENSMUSG00000006570	0	NA	NA	NA	NA	NA	8	22329942	22333498	protein_coding	Defb2
1027	ENSMUSG00000006574	4.12016	-0.720621	0.887189	0.812252	0.416647	NA	11	102239650	102257029	protein_coding	Slc4a1
1028	ENSMUSG00000006575	4784.78	0.0149633	0.0805694	-0.18572	0.852665	0.980368	11	102284229	102293381	protein_coding	Rundc3a
1029	ENSMUSG00000006576	3437.2	-0.0474301	0.0842035	0.56328	0.573245	0.937297	1	75522910	75538816	protein_coding	Slc4a3
1030	ENSMUSG00000006585	25.3836	0.482256	0.400224	-1.20497	0.228216	0.810307	8	123294754	123300293	protein_coding	Cdt1
1031	ENSMUSG00000006586	298.036	-0.358469	0.170789	2.0989	0.0358257	0.48467	4	13743436	13893649	protein_coding	Runx1t1
1032	ENSMUSG00000006587	13.5467	0.688477	0.538137	-1.27937	0.200767	0.788681	8	123180947	123187472	protein_coding	Snai3
1033	ENSMUSG00000006589	286.838	0.0555421	0.128152	-0.433409	0.664717	0.954949	8	123301374	123303648	protein_coding	Aprt
1034	ENSMUSG00000006599	684.605	-0.0404552	0.0799264	0.506155	0.612748	0.946155	7	46445527	46473224	protein_coding	Gtf2h1
1035	ENSMUSG00000006611	89.4939	0.38388	0.231575	-1.65769	0.0973796	0.661938	13	23886017	23894837	protein_coding	Hfe
1036	ENSMUSG00000006638	3.98805	-0.0279163	0.879888	0.031727	0.97469	NA	5	31107410	31112435	protein_coding	Abhd1
1037	ENSMUSG00000006641	468.582	-0.183123	0.0886005	2.06684	0.0387489	0.496379	5	31193380	31206268	protein_coding	Slc5a6
1038	ENSMUSG00000006642	5.02442	0.350226	0.716231	-0.488984	0.624853	NA	5	31126006	31134362	protein_coding	Tcf23
1039	ENSMUSG00000006649	38.0596	0.0746244	0.277168	-0.269239	0.787746	0.973354	7	30157740	30186648	protein_coding	Nphs1
1040	ENSMUSG00000006651	17586	-0.061768	0.0674303	0.916027	0.359653	0.879219	7	30134407	30144960	protein_coding	Aplp1
1041	ENSMUSG00000006673	1495.58	-0.0234869	0.061942	0.379175	0.704558	0.964754	9	108394005	108437362	protein_coding	Qrich1
1042	ENSMUSG00000006675	1108.32	-0.113797	0.0880728	1.29208	0.19633	0.786884	9	108456061	108474866	protein_coding	P4htm
1043	ENSMUSG00000006676	2593.19	-0.0273874	0.0654344	0.418547	0.675547	0.9587	9	108367801	108379536	protein_coding	Usp19
1044	ENSMUSG00000006678	55.7589	0.287958	0.237329	-1.21333	0.225004	0.809155	X	92348373	92675761	protein_coding	Pola1
1045	ENSMUSG00000006699	4360.64	-0.0434482	0.0666317	0.652065	0.514359	0.921659	4	137047007	137085031	protein_coding	Cdc42
1046	ENSMUSG00000006705	225.625	0.15375	0.133489	-1.15178	0.249412	0.821828	17	31783708	31826667	protein_coding	Pknox1
1047	ENSMUSG00000006711	1142.19	-0.127042	0.070782	1.79483	0.0726801	0.60784	13	25029118	25085253	protein_coding	D130043K22Rik
1048	ENSMUSG00000006715	30.9753	-0.1235	0.305578	0.404153	0.6861	0.960878	13	24935828	24945906	protein_coding	Gmnn
1049	ENSMUSG00000006717	655.679	-0.0385711	0.0868417	0.444154	0.656932	0.954423	13	25001931	25015523	protein_coding	Acot13
1050	ENSMUSG00000006720	50.7425	-0.219496	0.275426	0.796933	0.42549	0.899949	13	22129264	22144949	protein_coding	Zfp184
1051	ENSMUSG00000006724	7.10341	-0.719564	0.745857	0.964748	0.334671	NA	10	126884119	126888875	protein_coding	Cyp27b1
1052	ENSMUSG00000006728	540.315	-0.0362888	0.0885319	0.409895	0.681883	0.959701	10	126899403	126903789	protein_coding	Cdk4
1053	ENSMUSG00000006731	1405.17	-0.0817173	0.0795823	1.02683	0.304502	0.854808	10	127001094	127008199	protein_coding	B4galnt1
1054	ENSMUSG00000006732	143.453	-0.110003	0.162136	0.678463	0.497478	0.917865	10	126877283	126882234	protein_coding	Mettl1
1055	ENSMUSG00000006736	419.386	0.0882222	0.0906781	-0.972917	0.330595	0.864683	10	126903149	126906133	protein_coding	Tspan31
1056	ENSMUSG00000006740	4331.21	0.0566883	0.0933797	-0.607073	0.543802	0.928418	18	6201002	6242174	protein_coding	Kif5b
1057	ENSMUSG00000006763	194.437	-0.0932136	0.139043	0.670392	0.502608	0.919339	7	46335532	46360104	protein_coding	Saal1
1058	ENSMUSG00000006764	24.4628	0.312895	0.385917	-0.810783	0.41749	0.899637	10	114914546	115020927	protein_coding	Tph2
1059	ENSMUSG00000006777	25.2002	0.174661	0.365907	-0.477338	0.633122	0.949948	11	99368800	99383963	protein_coding	Krt23
1060	ENSMUSG00000006782	2739.01	-0.180333	0.249545	0.72265	0.469895	0.915393	11	100465730	100482555	protein_coding	Cnp
1061	ENSMUSG00000006784	43.2116	-0.121528	0.316304	0.384212	0.700821	0.964328	11	100436433	100463394	protein_coding	Odad4
1062	ENSMUSG00000006800	1618.75	-0.400308	0.117749	3.39967	0.000674684	0.0599446	2	165915009	165997583	protein_coding	Sulf2
1063	ENSMUSG00000006818	2998.73	-0.0307893	0.0675435	0.455844	0.648502	0.952907	17	13225733	13258950	protein_coding	Sod2
1064	ENSMUSG00000006850	174.21	0.148735	0.160879	-0.924516	0.355218	0.877621	18	36868092	36875450	protein_coding	Tmco6
1065	ENSMUSG00000006906	533.032	-0.118355	0.0827334	1.43055	0.152558	0.743708	6	83520193	83549711	protein_coding	Stambp
1066	ENSMUSG00000006920	1541.31	0.0176691	0.0656352	-0.269202	0.787774	0.973354	11	101081941	101117289	protein_coding	Ezh1
1067	ENSMUSG00000006930	1456.11	0.0383915	0.227966	-0.168409	0.866262	0.982098	11	100238153	100246954	protein_coding	Hap1
1068	ENSMUSG00000006931	167.441	-0.0642496	0.143156	0.448808	0.65357	0.953243	11	100299282	100305662	protein_coding	P3h4
1069	ENSMUSG00000006932	4164.74	-0.0757526	0.0605798	1.25046	0.211132	0.799978	9	120758282	120789573	protein_coding	Ctnnb1
1070	ENSMUSG00000006941	1149.87	0.009309	0.0651444	-0.142898	0.886371	0.985307	9	120321298	120324396	protein_coding	Eif1b
1071	ENSMUSG00000006948	0	NA	NA	NA	NA	NA	7	43530584	43535228	protein_coding	Klk4
1072	ENSMUSG00000006958	918.331	0.086561	0.0865984	-0.999568	0.317519	0.859488	16	20551877	20561134	protein_coding	Chrd
1073	ENSMUSG00000006998	3510.07	-0.0304781	0.0698278	0.436475	0.662492	0.954555	16	20470402	20482164	protein_coding	Psmd2
1074	ENSMUSG00000007021	1941	-0.0838567	0.066038	1.26982	0.204147	0.792026	17	24904066	24908929	protein_coding	Syngr3
1075	ENSMUSG00000007029	906.143	-0.0986361	0.0929943	1.06067	0.288841	0.844943	17	35219963	35235298	protein_coding	Vars1
1076	ENSMUSG00000007030	8.69842	-0.0468161	0.529732	0.088377	0.929577	0.993013	17	35235555	35245717	protein_coding	Vwa7
1077	ENSMUSG00000007033	50.9582	-0.482656	0.257765	1.87246	0.0611425	0.572652	17	35191679	35198261	protein_coding	Hspa1l
1078	ENSMUSG00000007034	11.0563	0.329027	0.531644	-0.618886	0.535992	0.927835	17	35133442	35149412	protein_coding	Slc44a4
1079	ENSMUSG00000007035	9.3841	0.00533415	0.558426	-0.00955212	0.992379	0.999189	17	35247581	35265721	protein_coding	Msh5
1080	ENSMUSG00000007036	1410.38	0.019406	0.0813029	-0.238687	0.811348	0.975415	17	35308239	35321963	protein_coding	Abhd16a
1081	ENSMUSG00000007038	1010.64	0.085599	0.0838139	-1.0213	0.307114	0.855118	17	35150229	35154929	protein_coding	Neu1
1082	ENSMUSG00000007039	97.3629	-0.0939752	0.201438	0.466522	0.640842	0.950863	17	35278011	35281071	protein_coding	Ddah2
1083	ENSMUSG00000007041	118.023	-0.0439466	0.237467	0.185064	0.853179	0.980368	17	35268942	35277725	protein_coding	Clic1
1084	ENSMUSG00000007050	70.2711	0.132286	0.243248	-0.543832	0.586557	0.940028	17	35200838	35204867	protein_coding	Lsm2
1085	ENSMUSG00000007080	45.7766	0.329972	0.275431	-1.19802	0.230909	0.811042	5	110434172	110485340	protein_coding	Pole
1086	ENSMUSG00000007097	25350.4	0.0859154	0.12623	-0.680625	0.496109	0.917865	1	172099276	172125631	protein_coding	Atp1a2
1087	ENSMUSG00000007107	3.09109	-0.424945	0.920166	0.461814	0.644215	NA	1	172051080	172085981	protein_coding	Atp1a4
1088	ENSMUSG00000007122	13.6073	0.495352	0.444902	-1.1134	0.265539	0.833205	1	172037461	172047435	protein_coding	Casq1
1089	ENSMUSG00000007207	7178.94	-0.0302715	0.0673078	0.449748	0.652892	0.953243	5	135052336	135079954	protein_coding	Stx1a
1090	ENSMUSG00000007209	6.52913	-0.436538	0.629113	0.693894	0.487749	NA	7	16455854	16460057	protein_coding	Ceacam9
1091	ENSMUSG00000007216	85.5147	0.00792261	0.200308	-0.039552	0.96845	0.99584	6	48578997	48600161	protein_coding	Zfp775
1092	ENSMUSG00000007279	20.0437	-0.207017	0.41419	0.499811	0.617208	0.947552	7	109397883	109464886	protein_coding	Scube2
1093	ENSMUSG00000007338	515.706	0.105687	0.0889729	-1.18786	0.23489	0.811918	19	6103652	6107815	protein_coding	Mrpl49
1094	ENSMUSG00000007379	14.3114	-0.247634	0.478677	0.517329	0.604926	0.944561	3	103009920	103077085	protein_coding	Dennd2c
1095	ENSMUSG00000007411	1342.44	-0.100216	0.0633285	1.58248	0.11354	0.686073	12	111540957	111622655	protein_coding	Mark3
1096	ENSMUSG00000007415	1065.06	-0.0615356	0.0821425	0.749132	0.453778	0.910046	5	3682932	3707185	protein_coding	Gatad1
1097	ENSMUSG00000007440	58.9463	0.231333	0.231215	-1.00051	0.317063	0.859461	18	37138256	37320710	protein_coding	Pcdha10
1098	ENSMUSG00000007457	0.139277	14.876	283.889	-0.0524008	0.958209	NA	5	88117318	88120729	protein_coding	2310003L06Rik
1099	ENSMUSG00000007458	1463.3	-0.0454305	0.0612569	0.741639	0.458306	0.912136	6	122285679	122294639	protein_coding	M6pr
1100	ENSMUSG00000007476	255.018	0.0182885	0.117226	-0.15601	0.876025	0.983718	2	30127727	30153802	protein_coding	Lrrc8a
1101	ENSMUSG00000007480	15.3251	0.647433	0.420413	-1.53999	0.123563	0.702511	18	68470575	68475517	protein_coding	Mc5r
1102	ENSMUSG00000007564	9766.43	-0.037312	0.0618103	0.603654	0.546074	0.929341	17	21165573	21186178	protein_coding	Ppp2r1a
1103	ENSMUSG00000007570	232.309	-0.00224925	0.145519	0.0154568	0.987668	0.998489	17	28532493	28545546	protein_coding	Fance
1104	ENSMUSG00000007589	212.683	0.028222	0.147255	-0.191653	0.848014	0.979869	14	55912146	55919277	protein_coding	Tinf2
1105	ENSMUSG00000007591	8.32784	-0.772207	0.542279	1.424	0.154445	0.746318	14	55887641	55889996	protein_coding	Tssk4
1106	ENSMUSG00000007594	3584.23	0.0711321	0.105178	-0.676303	0.498849	0.918285	8	70536107	70543512	protein_coding	Hapln4
1107	ENSMUSG00000007603	1070.38	-0.0891259	0.110557	0.80615	0.420156	0.899932	17	57071757	57077093	protein_coding	Dus3l
1108	ENSMUSG00000007610	425.576	0.207295	0.101651	-2.03928	0.0414218	0.505967	8	71940747	71952227	protein_coding	Gtpbp3
1109	ENSMUSG00000007613	473.934	-0.138856	0.087134	1.5936	0.111026	0.683515	4	47353222	47414931	protein_coding	Tgfbr1
1110	ENSMUSG00000007617	3288.82	-0.300125	0.076729	3.91149	9.17e-05	0.0132758	13	93436143	93541637	protein_coding	Homer1
1111	ENSMUSG00000007646	63.8445	-0.0773256	0.225155	0.343433	0.731273	0.96526	11	87267471	87295780	protein_coding	Rad51c
1112	ENSMUSG00000007653	3066.23	0.0210777	0.0697596	-0.302149	0.762539	0.969208	11	42310584	42519855	protein_coding	Gabrb2
1113	ENSMUSG00000007655	213.269	-0.191336	0.182964	1.04576	0.295674	0.847355	6	17306334	17341451	protein_coding	Cav1
1114	ENSMUSG00000007656	6906.22	0.037229	0.0805754	-0.462039	0.644053	0.952107	9	74944896	74967595	protein_coding	Arpp19
1115	ENSMUSG00000007659	1464.81	-0.15854	0.0752575	2.10663	0.0351495	0.480739	2	152622588	152673648	protein_coding	Bcl2l1
1116	ENSMUSG00000007670	1685.98	-0.141685	0.0762173	1.85897	0.0630319	0.578459	17	57328051	57338522	protein_coding	Khsrp
1117	ENSMUSG00000007682	1589.1	0.115667	0.106361	-1.0875	0.276816	0.840106	12	90691326	90705812	protein_coding	Dio2
1118	ENSMUSG00000007721	874.061	-0.0313933	0.107334	0.292483	0.769917	0.971071	8	71320871	71326579	protein_coding	Ccdc124
1119	ENSMUSG00000007739	1197.06	-0.0174773	0.0798984	0.218744	0.82685	0.976071	11	22940519	22953780	protein_coding	Cct4
1120	ENSMUSG00000007777	172.548	-0.12844	0.167877	0.765086	0.44422	0.909166	11	51576213	51579701	protein_coding	Trappc2b
1121	ENSMUSG00000007783	1729.74	-0.0742824	0.0612357	1.21306	0.225108	0.809155	7	44608796	44624275	protein_coding	Cpt1c
1122	ENSMUSG00000007805	4.88863	-0.665458	0.687107	0.968492	0.332799	NA	1	91729183	91775750	protein_coding	Twist2
1123	ENSMUSG00000007812	619.738	0.0679912	0.0853337	-0.796768	0.425586	0.899949	5	145168525	145213723	protein_coding	Zfp655
1124	ENSMUSG00000007815	1556.17	0.0483731	0.0652962	-0.740826	0.458799	0.912136	9	108183328	108215133	protein_coding	Rhoa
1125	ENSMUSG00000007817	3110.96	-0.182834	0.0850881	2.14875	0.0316538	0.465985	14	25459609	25667167	protein_coding	Zmiz1
1126	ENSMUSG00000007827	400.609	0.0241365	0.10449	-0.230995	0.817319	0.97554	6	118478269	118539187	protein_coding	Ankrd26
1127	ENSMUSG00000007833	103.435	0.0883855	0.176983	-0.499402	0.617496	0.947604	7	44790108	44804008	protein_coding	Aldh16a1
1128	ENSMUSG00000007836	1077.98	-0.0875812	0.0888569	0.985644	0.324308	0.862695	13	58273693	58276370	protein_coding	Hnrnpa0
1129	ENSMUSG00000007837	83.5375	-0.0834042	0.211985	0.393444	0.693992	0.963092	7	44703008	44712101	protein_coding	Prrg2
1130	ENSMUSG00000007850	3469.52	0.0131216	0.0587011	-0.223533	0.823121	0.975788	11	50267817	50277355	protein_coding	Hnrnph1
1131	ENSMUSG00000007867	103.679	0.175649	0.222898	-0.788022	0.430684	0.900856	12	86129315	86209233	protein_coding	Ift43
1132	ENSMUSG00000007872	204.444	0.133566	0.263563	-0.506771	0.612316	0.945984	4	135870808	135873066	protein_coding	Id3
1133	ENSMUSG00000007877	89.8263	0.299859	0.223662	-1.34068	0.180025	0.768546	11	98274637	98275779	protein_coding	Tcap
1134	ENSMUSG00000007880	2847.58	-0.0647559	0.0697997	0.927739	0.353543	0.876339	4	133406319	133484080	protein_coding	Arid1a
1135	ENSMUSG00000007888	13.3833	-0.26072	0.465711	0.559833	0.575593	0.937297	8	70945808	70956731	protein_coding	Crlf1
1136	ENSMUSG00000007891	2649.52	-0.0995657	0.0691332	1.4402	0.149811	0.738365	7	141929648	141941775	protein_coding	Ctsd
1137	ENSMUSG00000007892	3400.65	-0.0266476	0.105314	0.25303	0.800245	0.974199	9	61820566	61821824	protein_coding	Rplp1
1138	ENSMUSG00000007907	0	NA	NA	NA	NA	NA	5	88127298	88129403	protein_coding	Cabs1
1139	ENSMUSG00000007908	252	0.291462	0.150426	-1.93757	0.0526752	0.544228	9	75922137	76043632	protein_coding	Hmgcll1
1140	ENSMUSG00000007944	1001.93	-0.314095	0.0924001	3.3993	0.000675595	0.0599446	7	27353340	27356771	protein_coding	Ttc9b
1141	ENSMUSG00000007946	0	NA	NA	NA	NA	NA	7	101467520	101471933	protein_coding	Phox2a
1142	ENSMUSG00000007950	2659.42	-0.063995	0.108701	0.588726	0.556045	0.931508	8	71909349	71916299	protein_coding	Abhd8
1143	ENSMUSG00000007987	691.272	-0.127965	0.0814202	1.57166	0.11603	0.689815	5	136937004	136944258	protein_coding	Ift22
1144	ENSMUSG00000007989	3059.03	0.0411816	0.071371	-0.577008	0.563934	0.934914	14	65429898	65499912	protein_coding	Fzd3
1145	ENSMUSG00000008028	30.2074	-0.362374	0.304113	1.19157	0.233428	0.811918	7	44009467	44035244	protein_coding	1700008O03Rik
1146	ENSMUSG00000008035	963.117	0.0491215	0.0880675	-0.557771	0.577001	0.937297	X	10581252	10585929	protein_coding	Mid1ip1
1147	ENSMUSG00000008036	1036.5	-0.154276	0.103708	1.48759	0.136858	0.722516	7	16472335	16483219	protein_coding	Ap2s1
1148	ENSMUSG00000008090	306.577	-0.0248916	0.120511	0.20655	0.836361	0.977038	5	108840248	108854790	protein_coding	Fgfrl1
1149	ENSMUSG00000008129	71.4845	-0.22656	0.21395	1.05894	0.289627	0.844943	8	84874654	84899219	protein_coding	Brme1
1150	ENSMUSG00000008136	764.258	-0.21203	0.105349	2.01263	0.0441531	0.515957	1	43162234	43236144	protein_coding	Fhl2
1151	ENSMUSG00000008140	2541.15	-0.0806745	0.0733906	1.09925	0.271659	0.837254	7	44139361	44145953	protein_coding	Emc10
1152	ENSMUSG00000008153	9030.6	-0.0242918	0.0678562	0.35799	0.720351	0.964829	6	124407540	124441753	protein_coding	Clstn3
1153	ENSMUSG00000008167	235.601	-0.164882	0.121744	1.35434	0.175629	0.764001	8	85786684	85793753	protein_coding	Fbxw9
1154	ENSMUSG00000008193	0.2664	-0.628747	2.14293	0.293406	0.769212	NA	7	44175417	44181495	protein_coding	Spib
1155	ENSMUSG00000008200	1227.99	0.0428618	0.0928851	-0.461449	0.644476	0.952161	2	90575714	90611365	protein_coding	Fnbp4
1156	ENSMUSG00000008206	1376.09	-0.177709	0.0686605	2.58822	0.00964723	0.269873	8	4543026	4581680	protein_coding	Cers4
1157	ENSMUSG00000008226	537.957	0.0733056	0.11168	-0.656392	0.511572	0.920808	2	73142945	73168162	protein_coding	Scrn3
1158	ENSMUSG00000008301	487.57	-0.0481941	0.0926256	0.520311	0.602847	0.943742	18	56695515	56720784	protein_coding	Phax
1159	ENSMUSG00000008305	655.265	0.270212	0.0937496	-2.88227	0.00394821	0.158801	4	72036042	72119130	protein_coding	Tle1
1160	ENSMUSG00000008307	104.198	0.0341328	0.204091	-0.167243	0.867179	0.982098	5	3621566	3634356	protein_coding	1700109H08Rik
1161	ENSMUSG00000008318	476.428	0.0131065	0.176821	-0.0741228	0.940913	0.994393	7	100495054	100512653	protein_coding	Relt
1162	ENSMUSG00000008333	375.142	0.0746781	0.0963482	-0.775085	0.438289	0.905473	2	142904959	142914773	protein_coding	Snrpb2
1163	ENSMUSG00000008348	2121.1	0.0217403	0.0711515	-0.305549	0.759948	0.969208	5	125463029	125467266	protein_coding	Ubc
1164	ENSMUSG00000008373	561.308	-0.0853782	0.0815	1.04759	0.29483	0.84681	7	3632984	3645485	protein_coding	Prpf31
1165	ENSMUSG00000008384	129.289	0.351507	0.168092	-2.09116	0.036514	0.48467	7	27186335	27189741	protein_coding	Sertad1
1166	ENSMUSG00000008393	432.095	0.14675	0.111013	-1.32191	0.186197	0.773264	16	8476444	8490019	protein_coding	Carhsp1
1167	ENSMUSG00000008398	110.621	-0.18226	0.221159	0.824115	0.409874	0.89678	10	93083276	93146997	protein_coding	Elk3
1168	ENSMUSG00000008429	770.981	0.0175628	0.079499	-0.220918	0.825156	0.976071	9	25019428	25063116	protein_coding	Herpud2
1169	ENSMUSG00000008435	386.071	0.0281266	0.100552	-0.279723	0.77969	0.972852	7	4427769	4448648	protein_coding	Rdh13
1170	ENSMUSG00000008438	19.8529	0.371829	0.363606	-1.02261	0.306491	0.855118	12	81605358	81615248	protein_coding	Adam21
1171	ENSMUSG00000008450	316.306	0.115827	0.104632	-1.10699	0.268299	0.834452	8	106587212	106605962	protein_coding	Nutf2
1172	ENSMUSG00000008461	0.693652	-1.18777	1.51037	0.786413	0.431626	NA	7	45266713	45270483	protein_coding	Fut1
1173	ENSMUSG00000008475	668.37	-0.168645	0.104039	1.62097	0.105024	0.675806	1	152642293	152651348	protein_coding	Arpc5
1174	ENSMUSG00000008482	0.842161	0.433711	1.48636	-0.291794	0.770444	NA	17	24934813	24937037	protein_coding	Rnf151
1175	ENSMUSG00000008489	1224.38	-0.130296	0.126605	1.02915	0.303409	0.854388	4	91139000	91289022	protein_coding	Elavl2
1176	ENSMUSG00000008496	263.04	-0.0745579	0.157256	0.474119	0.635415	0.949948	7	24786769	24879151	protein_coding	Pou2f2
1177	ENSMUSG00000008540	69.3033	0.452398	0.265818	-1.70191	0.088772	0.649046	6	138117314	138133753	protein_coding	Mgst1
1178	ENSMUSG00000008575	1638.85	-0.267147	0.0666416	4.00872	6.1e-05	0.00971121	4	82208410	82623987	protein_coding	Nfib
1179	ENSMUSG00000008590	0.71763	0.239939	1.86854	-0.12841	0.897825	NA	9	48846308	48876290	protein_coding	Htr3b
1180	ENSMUSG00000008601	1.87679	0.278034	1.07957	-0.257542	0.796761	NA	3	88449336	88455607	protein_coding	Rab25
1181	ENSMUSG00000008604	3090.75	-0.0408828	0.0652224	0.626822	0.530776	0.927835	3	88461065	88477032	protein_coding	Ubqln4
1182	ENSMUSG00000008658	5573.37	0.0443764	0.0631574	-0.702632	0.482285	0.916489	16	5124665	7229391	protein_coding	Rbfox1
1183	ENSMUSG00000008668	1814.05	0.0521232	0.0921933	-0.565369	0.571823	0.937297	17	34170973	34174975	protein_coding	Rps18
1184	ENSMUSG00000008682	2255.36	0.0188319	0.079618	-0.236529	0.813022	0.975455	X	73314418	73316741	protein_coding	Rpl10
1185	ENSMUSG00000008683	1972.13	-0.0359868	0.0742454	0.484701	0.627889	0.949217	7	117703595	117715411	protein_coding	Rps15a
1186	ENSMUSG00000008690	1645.48	0.0554899	0.0615414	-0.901668	0.367233	0.88101	15	89239922	89257029	protein_coding	Ncaph2
1187	ENSMUSG00000008730	2340.92	0.00330443	0.066173	-0.0499362	0.960173	0.99584	3	103647131	103698879	protein_coding	Hipk1
1188	ENSMUSG00000008734	2426.93	0.0288463	0.074474	-0.387333	0.69851	0.964109	7	118571270	118594434	protein_coding	Gprc5b
1189	ENSMUSG00000008763	2897.48	0.034477	0.0923231	-0.373439	0.708822	0.96478	3	100469524	100592819	protein_coding	Man1a2
1190	ENSMUSG00000008789	0	NA	NA	NA	NA	NA	7	17447163	17495057	protein_coding	Ceacam5
1191	ENSMUSG00000008813	0	NA	NA	NA	NA	NA	14	52155882	52158157	protein_coding	Tppp2
1192	ENSMUSG00000008822	191.399	-0.111969	0.138093	0.810824	0.417467	0.899637	12	85319172	85335212	protein_coding	Acyp1
1193	ENSMUSG00000008843	0	NA	NA	NA	NA	NA	5	134943103	134944380	protein_coding	Cldn13
1194	ENSMUSG00000008845	57.5826	0.892089	0.302106	-2.9529	0.00314805	0.146309	6	124281615	124307486	protein_coding	Cd163
1195	ENSMUSG00000008855	2428.87	-0.142011	0.0847064	1.67651	0.0936377	0.654537	11	102085258	102120992	protein_coding	Hdac5
1196	ENSMUSG00000008859	963.808	-0.127917	0.0681337	1.87744	0.0604573	0.569634	13	18055156	18118824	protein_coding	Rala
1197	ENSMUSG00000008874	0.38979	0.372462	1.90145	-0.195883	0.844702	NA	8	115144826	115152586	protein_coding	Clec3a
1198	ENSMUSG00000008892	1165.19	0.00526041	0.068368	-0.0769425	0.938669	0.993944	8	23067102	23083774	protein_coding	Vdac3
1199	ENSMUSG00000008932	0.494831	16.6978	270.564	-0.0617148	0.95079	NA	4	107825529	107870729	protein_coding	Slc1a7
1200	ENSMUSG00000008958	398.055	-0.0885393	0.0939974	0.941934	0.346227	0.871713	3	95018333	95030362	protein_coding	Vps72
1201	ENSMUSG00000008976	358.043	0.0271835	0.120949	-0.224752	0.822172	0.975742	16	84631813	84660667	protein_coding	Gabpa
1202	ENSMUSG00000008999	286.264	-0.188721	0.572942	0.329388	0.741862	0.965913	2	172709805	172782114	protein_coding	Bmp7
1203	ENSMUSG00000009013	2253.82	-0.255405	0.0792857	3.22132	0.00127601	0.0880097	5	115435169	115439058	protein_coding	Dynll1
1204	ENSMUSG00000009030	377.892	-0.103474	0.103164	1.00301	0.315854	0.858138	2	37240086	37249344	protein_coding	Pdcl
1205	ENSMUSG00000009035	1624.77	-0.00339948	0.063357	0.053656	0.957209	0.99584	15	79244884	79287769	protein_coding	Tmem184b
1206	ENSMUSG00000009047	0	NA	NA	NA	NA	NA	16	88574784	88575616	protein_coding	Krtap13-23
1207	ENSMUSG00000009070	1.07438	-17.3633	190.611	0.0910928	0.927419	NA	10	74793309	74868418	protein_coding	Rsph14
1208	ENSMUSG00000009073	1813.42	-0.0476903	0.0779232	0.612017	0.540527	0.927883	11	4715845	4799536	protein_coding	Nf2
1209	ENSMUSG00000009075	281.27	-0.293564	0.184892	1.58776	0.112341	0.685335	11	4686892	4696778	protein_coding	Cabp7
1210	ENSMUSG00000009076	149.316	-0.0426417	0.168819	0.252588	0.800586	0.974199	11	4654678	4687669	protein_coding	Zmat5
1211	ENSMUSG00000009079	4050.42	0.0134301	0.0601394	-0.223316	0.823289	0.975788	11	5019689	5049266	protein_coding	Ewsr1
1212	ENSMUSG00000009090	3830.7	0.0112648	0.0717595	-0.15698	0.87526	0.983718	11	4936824	4992791	protein_coding	Ap1b1
1213	ENSMUSG00000009092	13.5114	0.859485	0.451137	-1.90515	0.0567602	0.562319	10	75729247	75731775	protein_coding	Derl3
1214	ENSMUSG00000009093	0.278555	15.8056	276.853	-0.0570902	0.954473	NA	10	75650777	75658377	protein_coding	Gstt4
1215	ENSMUSG00000009097	7.17118	0.123888	0.588603	-0.210479	0.833294	NA	16	18399729	18409421	protein_coding	Tbx1
1216	ENSMUSG00000009108	3.07163	0.105407	0.967059	-0.108997	0.913205	NA	3	108000105	108008748	protein_coding	Gnat2
1217	ENSMUSG00000009112	842.906	0.0778851	0.0752088	-1.03558	0.300396	0.852611	6	120813173	120869803	protein_coding	Bcl2l13
1218	ENSMUSG00000009114	0.352631	16.2463	273.701	-0.0593579	0.952667	NA	10	76284915	76296944	protein_coding	2610028H24Rik
1219	ENSMUSG00000009115	0.383943	0.366253	1.90204	-0.192558	0.847305	NA	10	76398106	76406035	protein_coding	Spatc1l
1220	ENSMUSG00000009145	8.60946	0.397118	0.626321	-0.634048	0.526049	0.926557	6	83034825	83044299	protein_coding	Dqx1
1221	ENSMUSG00000009185	1.05145	1.41639	1.78905	-0.791698	0.428537	NA	11	82006011	82007625	protein_coding	Ccl8
1222	ENSMUSG00000009207	929.235	-0.0716243	0.0719221	0.99586	0.319318	0.86022	2	74350635	74409779	protein_coding	Lnpk
1223	ENSMUSG00000009210	0.117544	14.8675	283.956	-0.0523583	0.958243	NA	11	106256298	106268384	protein_coding	Prr29
1224	ENSMUSG00000009214	2.98685	-1.20376	0.914999	1.31559	0.188313	NA	2	26951648	26962191	protein_coding	Mymk
1225	ENSMUSG00000009216	2303.64	-0.433303	0.0657693	6.58823	4.45e-11	1.31e-07	2	27000392	27032503	protein_coding	Fam163b
1226	ENSMUSG00000009246	2.31689	-1.63389	1.10638	1.47678	0.139733	NA	7	142622890	142648379	protein_coding	Trpm5
1227	ENSMUSG00000009248	3.3988	0.857012	0.940759	-0.910979	0.362306	NA	7	142520566	142523001	protein_coding	Ascl2
1228	ENSMUSG00000009281	36.3301	-0.377692	0.352931	1.07016	0.284549	0.843685	6	48546630	48549723	protein_coding	Rarres2
1229	ENSMUSG00000009291	873.03	0.0778058	0.0941825	-0.826117	0.408737	0.896672	10	77417554	77434566	protein_coding	Pttg1ip
1230	ENSMUSG00000009292	981.592	0.0466124	0.126889	-0.367348	0.71336	0.96478	10	77743556	77806397	protein_coding	Trpm2
1231	ENSMUSG00000009293	513.187	-0.0564214	0.0955059	0.590764	0.554679	0.931409	10	77458109	77481827	protein_coding	Ube2g2
1232	ENSMUSG00000009350	0.609034	-16.9236	191.623	0.0883172	0.929625	NA	11	87684407	87695239	protein_coding	Mpo
1233	ENSMUSG00000009356	12.3634	-0.891093	0.58156	1.53225	0.125462	0.705727	11	87697254	87719115	protein_coding	Lpo
1234	ENSMUSG00000009376	160.985	-1.06335	0.487629	2.18066	0.0292085	0.446523	6	17463799	17573979	protein_coding	Met
1235	ENSMUSG00000009378	72.0284	0.162412	0.233546	-0.695415	0.486795	0.916489	19	34645803	34724689	protein_coding	Slc16a12
1236	ENSMUSG00000009394	6091.41	-0.208609	0.0803196	2.59724	0.00939765	0.266592	6	115111863	115258967	protein_coding	Syn2
1237	ENSMUSG00000009406	1221.4	-0.118176	0.0930519	1.27	0.204083	0.792026	X	20799634	20816847	protein_coding	Elk1
1238	ENSMUSG00000009418	2879.94	-0.120061	0.0591979	2.02812	0.0425475	0.511365	1	135362318	135615843	protein_coding	Nav1
1239	ENSMUSG00000009470	1229.66	0.0103857	0.0630257	-0.164784	0.869114	0.98245	13	98975527	99062892	protein_coding	Tnpo1
1240	ENSMUSG00000009471	19.6708	-0.144767	0.362767	0.399064	0.689846	0.961753	7	46025898	46028523	protein_coding	Myod1
1241	ENSMUSG00000009487	2.34051	0.338524	0.993404	-0.340772	0.733276	NA	7	45890411	45960858	protein_coding	Otog
1242	ENSMUSG00000009535	1144.86	0.0187291	0.0838113	-0.223467	0.823172	0.975788	18	68433426	68457923	protein_coding	Rnmt
1243	ENSMUSG00000009545	4.49205	0.716972	0.747329	-0.959379	0.337368	NA	7	142660099	142980779	protein_coding	Kcnq1
1244	ENSMUSG00000009549	725.935	-0.0240643	0.0790844	0.304287	0.760909	0.969208	2	118306331	118310192	protein_coding	Srp14
1245	ENSMUSG00000009551	36.8644	0.0174537	0.302789	-0.0576431	0.954033	0.995659	2	32622629	32632457	lncRNA	6330409D20Rik
1246	ENSMUSG00000009555	1585.29	0.00231382	0.0613096	-0.0377399	0.969895	0.99613	2	32595796	32603088	protein_coding	Cdk9
1247	ENSMUSG00000009563	334.924	0.0829854	0.125273	-0.662439	0.50769	0.920736	2	32647246	32652256	protein_coding	Tor2a
1248	ENSMUSG00000009566	85.12	0.520591	0.211719	-2.45887	0.0139374	0.309161	2	32572621	32594157	protein_coding	Fpgs
1249	ENSMUSG00000009569	6184.72	-0.0234296	0.0619616	0.378131	0.705333	0.964754	16	13074345	13235393	protein_coding	Mrtfb
1250	ENSMUSG00000009575	3471.18	-0.0937784	0.0580532	1.61539	0.106227	0.677618	15	103099971	103148243	protein_coding	Cbx5
1251	ENSMUSG00000009580	0	NA	NA	NA	NA	NA	5	88032888	88042033	protein_coding	Odam
1252	ENSMUSG00000009585	59.9834	0.222311	0.353197	-0.629426	0.52907	0.927511	15	79775860	79800107	protein_coding	Apobec3
1253	ENSMUSG00000009588	0.705261	17.1629	267.458	-0.0641704	0.948835	NA	11	116655851	116666333	protein_coding	St6galnac1
1254	ENSMUSG00000009596	22.2438	-0.00358183	0.402102	0.00890775	0.992893	0.999393	X	133360867	133377239	protein_coding	Taf7l
1255	ENSMUSG00000009614	217.947	0.155652	0.146611	-1.06167	0.288385	0.844943	2	27078405	27138349	protein_coding	Sardh
1256	ENSMUSG00000009621	267.208	0.0244864	0.128939	-0.189906	0.849383	0.979996	2	27152116	27317045	protein_coding	Vav2
1257	ENSMUSG00000009628	7.93656	0.807775	0.579447	-1.39404	0.163304	0.754847	8	34006766	34075610	protein_coding	Tex15
1258	ENSMUSG00000009630	1759.88	-0.0303528	0.061143	0.496424	0.619595	0.947712	8	34089653	34109469	protein_coding	Ppp2cb
1259	ENSMUSG00000009633	36.6631	0.496909	0.28561	-1.73981	0.0818917	0.633083	1	192954469	192955525	protein_coding	G0s2
1260	ENSMUSG00000009640	356.143	-0.0868188	0.0969386	0.895606	0.370463	0.881919	4	117531878	117539470	protein_coding	Dmap1
1261	ENSMUSG00000009646	0	NA	NA	NA	NA	NA	10	59239482	59257798	protein_coding	Pla2g12b
1262	ENSMUSG00000009647	541.784	-0.0920809	0.0859464	1.07138	0.284001	0.843685	10	59282806	59452514	protein_coding	Mcu
1263	ENSMUSG00000009654	1.7923	-0.427121	1.12923	0.378242	0.705251	NA	10	59258780	59277600	protein_coding	Oit3
1264	ENSMUSG00000009670	3.74168	1.40199	1.21605	-1.15291	0.248949	NA	X	99882254	100103273	protein_coding	Tex11
1265	ENSMUSG00000009681	2458.04	-0.104061	0.0652614	1.59453	0.110817	0.683515	10	74896424	75020753	protein_coding	Bcr
1266	ENSMUSG00000009687	313.59	0.0405835	0.176569	-0.229845	0.818212	0.97554	7	30732147	30741906	protein_coding	Fxyd5
1267	ENSMUSG00000009731	273.602	0.0105935	0.134521	-0.0787492	0.937232	0.993944	X	7688528	7704519	protein_coding	Kcnd1
1268	ENSMUSG00000009733	434.627	-0.00700096	0.104544	0.0669668	0.946608	0.99545	15	100395893	100449889	protein_coding	Tfcp2
1269	ENSMUSG00000009734	56.6756	-0.241993	0.293867	0.823479	0.410236	0.89678	13	18295683	18797700	protein_coding	Pou6f2
1270	ENSMUSG00000009739	4183.53	0.152607	0.0564605	-2.70289	0.00687386	0.226018	15	100473199	100497865	protein_coding	Pou6f1
1271	ENSMUSG00000009741	1884.91	0.0133731	0.0716075	-0.186755	0.851853	0.980331	9	113760002	113806270	protein_coding	Ubp1
1272	ENSMUSG00000009772	13.6986	-0.49589	0.454025	1.09221	0.274742	0.838089	1	132243864	132261226	protein_coding	Nuak2
1273	ENSMUSG00000009828	451.007	0.0706681	0.107844	-0.655281	0.512287	0.920918	9	78016474	78079389	protein_coding	Cilk1
1274	ENSMUSG00000009863	1587.54	-0.0620967	0.0758447	0.818735	0.412937	0.898454	4	140688514	140706504	protein_coding	Sdhb
1275	ENSMUSG00000009876	13.6741	-0.0606104	0.428725	0.141374	0.887575	0.985595	2	152596093	152606957	protein_coding	Cox4i2
1276	ENSMUSG00000009894	6054.05	-0.0233748	0.0663164	0.352475	0.724482	0.964829	11	59297960	59342012	protein_coding	Snap47
1277	ENSMUSG00000009900	0	NA	NA	NA	NA	NA	11	59138859	59181578	protein_coding	Wnt3a
1278	ENSMUSG00000009905	644.969	0.0215753	0.0953494	-0.226277	0.820986	0.97554	1	106648189	106687457	protein_coding	Kdsr
1279	ENSMUSG00000009907	820.277	0.0535905	0.0731866	-0.732246	0.464019	0.913655	1	106691801	106724458	protein_coding	Vps4b
1280	ENSMUSG00000009927	1886.58	0.0961239	0.0897301	-1.07126	0.284054	0.843685	9	44318436	44321724	protein_coding	Rps25
1281	ENSMUSG00000009941	1.19353	-0.266883	1.26651	0.210723	0.833104	NA	X	133845275	133865503	protein_coding	Nxf2
1282	ENSMUSG00000009995	839.569	-0.0279983	0.088513	0.316319	0.75176	0.966823	X	73325518	73333757	protein_coding	Tafazzin
1283	ENSMUSG00000010021	45.0661	-0.235731	0.260311	0.905577	0.36516	0.880574	11	114656214	114681565	protein_coding	Kif19a
1284	ENSMUSG00000010025	753.478	0.024932	0.078495	-0.317626	0.750769	0.966823	11	61114243	61158290	protein_coding	Aldh3a2
1285	ENSMUSG00000010044	36.8922	-0.398903	0.313207	1.27361	0.202803	0.791461	9	107424497	107428518	protein_coding	Zmynd10
1286	ENSMUSG00000010045	396.129	0.0836936	0.128222	-0.652723	0.513935	0.921659	9	107411144	107415872	protein_coding	Tmem115
1287	ENSMUSG00000010047	119.824	0.185524	0.181176	-1.024	0.305837	0.855118	9	107445144	107449978	protein_coding	Hyal2
1288	ENSMUSG00000010048	99.2834	-0.318017	0.230917	1.37719	0.168453	0.759101	9	107464841	107470584	protein_coding	Ifrd2
1289	ENSMUSG00000010051	55.5136	0.182165	0.312483	-0.58296	0.55992	0.933231	9	107454126	107458909	protein_coding	Hyal1
1290	ENSMUSG00000010054	1319.73	0.0405182	0.0755509	-0.536304	0.591748	0.940544	9	107440454	107443311	protein_coding	Tusc2
1291	ENSMUSG00000010057	482.293	-0.0205537	0.0858723	0.239352	0.810832	0.975415	9	107419425	107422905	protein_coding	Nprl2
1292	ENSMUSG00000010064	1554.99	0.0391053	0.0780766	-0.500858	0.616471	0.947552	9	107527833	107546729	protein_coding	Slc38a3
1293	ENSMUSG00000010066	865.822	-0.0650135	0.141035	0.460974	0.644817	0.952269	9	107276811	107406542	protein_coding	Cacna2d2
1294	ENSMUSG00000010067	85.0441	0.0620311	0.192829	-0.321689	0.747688	0.966279	9	107428754	107439466	protein_coding	Rassf1
1295	ENSMUSG00000010080	17.2095	0.884651	0.507524	-1.74307	0.0813211	0.631188	11	94380425	94390800	protein_coding	Epn3
1296	ENSMUSG00000010086	7717.49	0.0851089	0.0593793	-1.43331	0.151769	0.741093	11	61339268	61344957	protein_coding	Rnf112
1297	ENSMUSG00000010095	1736.02	0.0387174	0.061288	-0.631728	0.527565	0.926886	19	8684246	8700733	protein_coding	Slc3a2
1298	ENSMUSG00000010097	1521.26	0.0351004	0.0676195	-0.519087	0.6037	0.944076	19	8734437	8748286	protein_coding	Nxf1
1299	ENSMUSG00000010110	1027.07	0.0108097	0.0682235	-0.158445	0.874106	0.98368	19	8718777	8733433	protein_coding	Stx5a
1300	ENSMUSG00000010122	100.39	-1.09276	0.974427	1.12144	0.2621	0.831627	11	61234227	61269171	protein_coding	Slc47a1
1301	ENSMUSG00000010136	3.76474	0.829585	1.15998	-0.715174	0.474502	NA	3	105904273	105921962	protein_coding	Cimap3
1302	ENSMUSG00000010142	14.7186	-0.946595	0.43017	2.20051	0.0277705	0.441762	11	61017581	61040198	protein_coding	Tnfrsf13b
1303	ENSMUSG00000010154	215.372	-0.0167798	0.128002	0.13109	0.895704	0.988856	8	124059452	124096254	protein_coding	Spire2
1304	ENSMUSG00000010175	232.064	0.0335202	0.123758	-0.270853	0.786504	0.973354	1	189850232	189902911	protein_coding	Prox1
1305	ENSMUSG00000010205	0	NA	NA	NA	NA	NA	9	20985454	21003304	protein_coding	Raver1
1306	ENSMUSG00000010277	6276.34	0.0338804	0.0663465	-0.510658	0.609591	0.945535	11	78152578	78181449	protein_coding	Bltp2
1307	ENSMUSG00000010290	536.195	-0.154355	0.0927018	1.66508	0.0958976	0.659493	1	43137870	43155107	protein_coding	AI597479
1308	ENSMUSG00000010307	220.989	-0.0396285	0.126148	0.314143	0.753413	0.967914	7	46700349	46704525	protein_coding	Tmem86a
1309	ENSMUSG00000010311	9.99855	1.45489	0.562952	-2.58439	0.00975513	0.269873	1	133824937	133835737	protein_coding	Optc
1310	ENSMUSG00000010342	7.87822	-0.892658	0.565017	1.57988	0.114135	0.686345	11	87295891	87446649	protein_coding	Tex14
1311	ENSMUSG00000010358	30.2023	-0.0468961	0.307061	0.152726	0.878614	0.984434	11	101339233	101349524	protein_coding	Ifi35
1312	ENSMUSG00000010362	69.0952	0.0334796	0.235284	-0.142295	0.886847	0.985307	11	101518021	101526926	protein_coding	Rdm1
1313	ENSMUSG00000010376	927.639	-0.100898	0.0775731	1.30069	0.193366	0.783771	14	55899720	55909581	protein_coding	Nedd8
1314	ENSMUSG00000010392	819.683	-0.0314695	0.0727944	0.432306	0.665519	0.955059	11	76617428	76654405	protein_coding	Gosr1
1315	ENSMUSG00000010406	105.24	0.0934531	0.175654	-0.532031	0.594705	0.94199	14	54664366	54667213	protein_coding	Mrpl52
1316	ENSMUSG00000010435	0	NA	NA	NA	NA	NA	8	12623029	12650744	protein_coding	Spaca7
1317	ENSMUSG00000010453	1555.57	0.00769305	0.0654392	-0.11756	0.906416	0.990686	1	36374811	36408262	protein_coding	Kansl3
1318	ENSMUSG00000010461	208.973	0.172543	0.188658	-0.914579	0.360413	0.879219	10	22978862	23226684	protein_coding	Eya4
1319	ENSMUSG00000010476	8.25145	0.773337	0.646745	-1.19574	0.231799	0.811399	7	136795402	136916174	protein_coding	Ebf3
1320	ENSMUSG00000010492	29.5086	-0.413427	0.367881	1.12381	0.261095	0.83081	2	181220273	181226963	lncRNA	Uckl1os
1321	ENSMUSG00000010505	166.849	0.0835669	0.14705	-0.56829	0.569838	0.93656	2	181405125	181469590	protein_coding	Myt1
1322	ENSMUSG00000010517	536.862	0.0793398	0.0991126	-0.800502	0.42342	0.899932	4	109533785	109821157	protein_coding	Faf1
1323	ENSMUSG00000010529	21.4505	-0.186019	0.351877	0.528647	0.597051	0.942536	12	111451043	111452257	protein_coding	Gm266
1324	ENSMUSG00000010538	9.57632	-0.35662	0.506954	0.703456	0.481772	0.916466	3	88190064	88204306	protein_coding	Tsacc
1325	ENSMUSG00000010554	501.051	-0.0508328	0.0895142	0.567874	0.57012	0.936606	11	74661656	74719351	protein_coding	Mettl16
1326	ENSMUSG00000010592	51.3046	-0.199838	0.289774	0.689633	0.490425	0.916597	17	50586423	50600664	protein_coding	Dazl
1327	ENSMUSG00000010601	8.82098	0.12661	0.537829	-0.235409	0.813891	0.975455	15	77272419	77283310	protein_coding	Apol7a
1328	ENSMUSG00000010607	178.654	0.056714	0.189162	-0.299817	0.764317	0.969702	9	22068142	22069654	protein_coding	Pigyl
1329	ENSMUSG00000010608	2413.84	-0.00450971	0.0631978	0.0713586	0.943112	0.994864	12	83678010	83729897	protein_coding	Rbm25
1330	ENSMUSG00000010609	265.801	-0.00357901	0.114156	0.031352	0.974989	0.996511	1	180054569	180091003	protein_coding	Psen2
1331	ENSMUSG00000010651	3.76797	1.03955	0.863756	-1.20352	0.228774	NA	9	118977091	118986161	protein_coding	Acaa1b
1332	ENSMUSG00000010660	280.074	0.0305319	0.126385	-0.241579	0.809107	0.975169	9	118900595	118922570	protein_coding	Plcd1
1333	ENSMUSG00000010663	4204.22	0.00748443	0.0883734	-0.0846909	0.932507	0.993096	19	10160252	10174241	protein_coding	Fads1
1334	ENSMUSG00000010721	551.907	0.0345706	0.0926451	-0.37315	0.709037	0.96478	5	29434800	29583388	protein_coding	Lmbr1
1335	ENSMUSG00000010751	22.4852	-0.86304	0.408195	2.11428	0.0344912	0.479588	7	143188543	143203398	protein_coding	Tnfrsf22
1336	ENSMUSG00000010755	967.128	-0.075466	0.0778864	0.968923	0.332583	0.865115	7	143110967	143153827	protein_coding	Cars1
1337	ENSMUSG00000010760	0	NA	NA	NA	NA	NA	7	143055282	143056887	protein_coding	Phlda2
1338	ENSMUSG00000010796	0	NA	NA	NA	NA	NA	6	18050963	18109060	protein_coding	Asz1
1339	ENSMUSG00000010797	47.8959	-0.445723	0.273261	1.63112	0.102864	0.67313	6	17988939	18030584	protein_coding	Wnt2
1340	ENSMUSG00000010803	10492.5	0.146765	0.101211	-1.45009	0.147034	0.735009	11	42021766	42073757	protein_coding	Gabra1
1341	ENSMUSG00000010825	168.784	0.619327	0.212472	-2.91487	0.00355838	0.15098	5	143343093	143377907	protein_coding	Grid2ip
1342	ENSMUSG00000010830	10.3564	0.918476	0.566966	-1.61998	0.105236	0.676394	15	79400612	79411940	protein_coding	Kdelr3
1343	ENSMUSG00000010841	6.26432	0.00625099	0.748197	-0.00835474	0.993334	NA	11	101875105	101883090	protein_coding	Cfap97d1
1344	ENSMUSG00000010911	140.492	0.134917	0.161992	-0.832863	0.404922	0.89611	2	102904020	102922989	protein_coding	Apip
1345	ENSMUSG00000010914	719.594	0.0641725	0.0796928	-0.805249	0.420676	0.899932	2	102851420	102903858	protein_coding	Pdhx
1346	ENSMUSG00000010936	506.684	0.0381348	0.086754	-0.439575	0.660245	0.954522	8	111345217	111447030	protein_coding	Vac14
1347	ENSMUSG00000011008	0.117544	14.8675	283.956	-0.0523583	0.958243	NA	3	145855588	145901268	protein_coding	Mcoln2
1348	ENSMUSG00000011034	0.710502	1.45306	1.85157	-0.784774	0.432586	NA	5	33261563	33320214	protein_coding	Slc5a1
1349	ENSMUSG00000011096	371.064	0.077863	0.107504	-0.724283	0.468892	0.915393	7	44498415	44504845	protein_coding	Akt1s1
1350	ENSMUSG00000011114	647.452	0.0882478	0.0786788	-1.12162	0.262024	0.831627	9	37560059	37568608	protein_coding	Tbrg1
1351	ENSMUSG00000011118	0.117544	14.8675	283.956	-0.0523583	0.958243	NA	9	37571198	37580531	protein_coding	Panx3
1352	ENSMUSG00000011148	366.32	-0.238551	0.197348	1.20878	0.226747	0.81027	12	112586479	112607794	protein_coding	Adss1
1353	ENSMUSG00000011154	4.27461	0.365619	0.963068	-0.37964	0.704212	NA	7	83423309	83444088	protein_coding	Cfap161
1354	ENSMUSG00000011158	614.528	-0.0773087	0.0803181	0.962532	0.335782	0.866121	12	112923705	112964324	protein_coding	Brf1
1355	ENSMUSG00000011171	12.6738	-0.60142	0.509073	1.1814	0.237443	0.812802	12	116041346	116109881	protein_coding	Vipr2
1356	ENSMUSG00000011179	891.181	0.0191878	0.0820202	-0.23394	0.815031	0.97554	12	17594795	17601506	protein_coding	Odc1
1357	ENSMUSG00000011254	131.748	-0.0987366	0.185827	0.531336	0.595186	0.942205	11	45837670	45846321	protein_coding	Thg1l
1358	ENSMUSG00000011256	285.685	-0.356228	0.116658	3.05361	0.00226105	0.12322	11	45946819	46038170	protein_coding	Adam19
1359	ENSMUSG00000011257	475.896	-0.103899	0.114521	0.907247	0.364276	0.880548	4	123156144	123192718	protein_coding	Pabpc4
1360	ENSMUSG00000011263	5.95382	-0.44717	0.659684	0.677855	0.497863	NA	7	19197256	19230687	protein_coding	Exoc3l2
1361	ENSMUSG00000011267	54.967	0.138473	0.322786	-0.428995	0.667927	0.956454	7	19311212	19314581	protein_coding	Zfp296
1362	ENSMUSG00000011305	9.19838	0.443932	0.522326	-0.849914	0.395373	0.894567	17	56418601	56424596	protein_coding	Plin5
1363	ENSMUSG00000011306	1073.2	-0.0296378	0.0732944	0.404367	0.685943	0.960878	8	70495463	70524997	protein_coding	Sugp1
1364	ENSMUSG00000011349	0.446568	-16.5145	192.579	0.0857542	0.931662	NA	7	24569482	24577076	protein_coding	Dmrtc2
1365	ENSMUSG00000011350	0	NA	NA	NA	NA	NA	7	24518220	24539700	protein_coding	Gm5893
1366	ENSMUSG00000011382	248.073	0.18081	0.124746	-1.44943	0.147218	0.735341	7	45120411	45138229	protein_coding	Dhdh
1367	ENSMUSG00000011427	294.295	0.24679	0.10859	-2.27267	0.0230461	0.404097	7	29515539	29530430	protein_coding	Zfp790
1368	ENSMUSG00000011463	1.49725	-2.21145	1.37861	1.60411	0.108689	NA	3	20302428	20329897	protein_coding	Cpb1
1369	ENSMUSG00000011486	1.84107	0.838308	1.22718	-0.683117	0.494533	NA	17	57339773	57348654	protein_coding	Slc25a41
1370	ENSMUSG00000011589	650.318	-0.0358141	0.0942087	0.380158	0.703828	0.964754	17	56293509	56303881	protein_coding	Fsd1
1371	ENSMUSG00000011632	0.148856	-15.0549	196.106	0.0767694	0.938807	NA	7	24241083	24245543	protein_coding	Pinlyp
1372	ENSMUSG00000011658	125.416	0.128552	0.186624	-0.688828	0.490931	0.916597	7	44545503	44552055	protein_coding	Fuz
1373	ENSMUSG00000011751	3047.63	-0.0127204	0.107248	0.118607	0.905586	0.990686	7	27055808	27147111	protein_coding	Sptbn4
1374	ENSMUSG00000011752	2858.08	-0.0324814	0.0697138	0.465926	0.641269	0.950927	19	41900362	41907099	protein_coding	Pgam1
1375	ENSMUSG00000011831	1637.54	-0.0169179	0.0641327	0.263795	0.791938	0.974199	5	107892661	108022973	protein_coding	Evi5
1376	ENSMUSG00000011832	1612.65	-0.0339325	0.0753004	0.450629	0.652257	0.953243	8	4216567	4261257	protein_coding	Evi5l
1377	ENSMUSG00000011837	361.942	-0.040713	0.115544	0.352358	0.72457	0.964829	8	4303080	4306220	protein_coding	Snapc2
1378	ENSMUSG00000011877	8058.34	-0.0769663	0.0862212	0.89266	0.372039	0.88307	11	77384388	77398612	protein_coding	Git1
1379	ENSMUSG00000011884	400.371	-0.00912019	0.119828	0.0761107	0.939331	0.994002	5	114807459	114829045	protein_coding	Gltp
1380	ENSMUSG00000011958	490.217	-0.0358095	0.0852868	0.419872	0.674579	0.958172	9	69896748	69915599	protein_coding	Bnip2
1381	ENSMUSG00000011960	793.931	-0.0337914	0.0737951	0.457908	0.647018	0.952656	15	98436570	98468804	protein_coding	Ccnt1
1382	ENSMUSG00000012017	34.1891	-0.210093	0.286593	0.73307	0.463516	0.913018	16	17615146	17626157	protein_coding	Scarf2
1383	ENSMUSG00000012042	0	NA	NA	NA	NA	NA	3	137869839	137945424	protein_coding	4930579F01Rik
1384	ENSMUSG00000012076	1062.89	-0.00429977	0.07486	0.0574375	0.954197	0.995659	12	55883109	55916521	protein_coding	Brms1l
1385	ENSMUSG00000012114	1252.14	-0.0424927	0.0694567	0.611787	0.540679	0.927883	16	17469072	17550755	protein_coding	Med15
1386	ENSMUSG00000012117	1328.02	0.0638284	0.0648287	-0.98457	0.324835	0.862804	4	133696339	133728229	protein_coding	Dhdds
1387	ENSMUSG00000012123	20.9042	-0.399045	0.368853	1.08185	0.279317	0.841348	4	133788126	133819815	protein_coding	Crybg2
1388	ENSMUSG00000012126	339.091	-0.0647178	0.103684	0.624184	0.532507	0.927835	4	133829881	133854904	protein_coding	Ubxn11
1389	ENSMUSG00000012187	1.58578	-1.33701	1.1724	1.14041	0.254116	NA	1	78487628	78514810	protein_coding	Mogat1
1390	ENSMUSG00000012211	0.270936	-0.633014	2.14231	0.295483	0.767625	NA	12	113038122	113052537	protein_coding	Tex22
1391	ENSMUSG00000012282	0.476021	16.6836	270.661	-0.0616401	0.950849	NA	18	34675366	34681326	protein_coding	Wnt8a
1392	ENSMUSG00000012296	341.514	0.130876	0.134934	-0.969925	0.332084	0.864966	17	46568777	46593952	protein_coding	Tjap1
1393	ENSMUSG00000012350	4.56908	0.949471	0.742382	-1.27895	0.200914	NA	2	103093778	103133623	protein_coding	Ehf
1394	ENSMUSG00000012396	0	NA	NA	NA	NA	NA	6	122684448	122691592	protein_coding	Nanog
1395	ENSMUSG00000012405	1822.8	-0.0672336	0.0859055	0.782645	0.433835	0.902755	14	4198305	4201873	protein_coding	Rpl15
1396	ENSMUSG00000012422	831.515	-0.00881466	0.0863034	0.102136	0.918649	0.992228	13	90237242	90292026	protein_coding	Tmem167
1397	ENSMUSG00000012428	4.23483	3.34314	1.1715	-2.85372	0.00432107	NA	5	8010457	8032213	protein_coding	Steap4
1398	ENSMUSG00000012429	112.175	0.0944739	0.169957	-0.555871	0.578299	0.937297	13	17869777	17874333	protein_coding	Mplkip
1399	ENSMUSG00000012443	24.2812	0.533941	0.359488	-1.48528	0.13747	0.722516	19	37364851	37410307	protein_coding	Kif11
1400	ENSMUSG00000012483	85.234	-0.056614	0.19303	0.293291	0.7693	0.970855	6	8255936	8259173	protein_coding	Rpa3
1401	ENSMUSG00000012519	3.29791	0.522648	0.861475	-0.606689	0.544057	NA	8	112038429	112064809	protein_coding	Mlkl
1402	ENSMUSG00000012520	0	NA	NA	NA	NA	NA	5	67251742	67256644	protein_coding	Phox2b
1403	ENSMUSG00000012535	1309.64	-0.00858365	0.0621192	0.13818	0.890098	0.986347	6	29540826	29609886	protein_coding	Tnpo3
1404	ENSMUSG00000012609	809.745	0.031371	0.0879	-0.356894	0.721171	0.964829	12	85871433	86108667	protein_coding	Ttll5
1405	ENSMUSG00000012640	476.073	0.201976	0.0988429	-2.04341	0.0410121	0.504283	7	42945621	42962718	protein_coding	Zfp715
1406	ENSMUSG00000012705	6.45977	-0.539506	0.663628	0.812964	0.416238	NA	8	3705770	3710110	protein_coding	Retn
1407	ENSMUSG00000012777	0.722041	-2.58317	1.77653	1.45406	0.145931	NA	7	43901572	43906802	protein_coding	Acp4
1408	ENSMUSG00000012819	13.6046	0.595952	0.487646	-1.2221	0.22167	0.807101	10	60138527	60532269	protein_coding	Cdh23
1409	ENSMUSG00000012848	1877.14	0.0389467	0.0833524	-0.467254	0.640318	0.950716	7	12656217	12660613	protein_coding	Rps5
1410	ENSMUSG00000012889	0.758307	1.69207	1.75457	-0.964381	0.334855	NA	8	84852618	84859156	protein_coding	Podnl1
1411	ENSMUSG00000013033	10217.2	-0.0901715	0.0656678	1.37315	0.169707	0.759253	8	84626734	84668583	protein_coding	Adgrl1
1412	ENSMUSG00000013076	503.175	-0.070707	0.0844698	0.837069	0.402554	0.895681	9	14453262	14556352	protein_coding	Amotl1
1413	ENSMUSG00000013083	0	NA	NA	NA	NA	NA	7	30398351	30399961	protein_coding	2200002J24Rik
1414	ENSMUSG00000013089	1963.01	-0.3952	0.112751	3.50508	0.000456478	0.045281	16	22200059	22258469	protein_coding	Etv5
1415	ENSMUSG00000013091	8.46135	-0.206757	0.616928	0.335139	0.73752	0.965778	7	4785936	4787340	protein_coding	Tmem190
1416	ENSMUSG00000013150	310.707	-0.188944	0.103406	1.8272	0.0676696	0.592942	8	106440486	106485296	protein_coding	Gfod2
1417	ENSMUSG00000013155	88.1251	-0.228077	0.188871	1.20758	0.227209	0.81027	8	106430283	106434842	protein_coding	Enkd1
1418	ENSMUSG00000013158	3.33481	-1.1445	0.842512	1.35844	0.174324	NA	8	106434287	106436878	protein_coding	4933405L10Rik
1419	ENSMUSG00000013160	3462.51	-0.101266	0.0616846	1.64167	0.100659	0.668927	8	106251097	106292679	protein_coding	Atp6v0d1
1420	ENSMUSG00000013236	9910.84	-0.0950317	0.0757167	1.2551	0.209444	0.798341	17	56719426	56783483	protein_coding	Ptprs
1421	ENSMUSG00000013275	1261.51	0.080047	0.105368	-0.759686	0.447442	0.90941	1	131755231	131776603	protein_coding	Slc41a1
1422	ENSMUSG00000013338	1.3693	-0.535288	1.49878	0.357149	0.72098	NA	2	155861059	155894867	protein_coding	Fer1l4
1423	ENSMUSG00000013353	0.779233	17.2625	266.795	-0.0647031	0.94841	NA	7	43141468	43155364	protein_coding	Siglecl2
1424	ENSMUSG00000013367	707.645	-0.0286088	0.107983	0.264938	0.791057	0.974199	7	43122328	43139499	protein_coding	Iglon5
1425	ENSMUSG00000013415	0.837422	17.4173	265.789	-0.0655304	0.947752	NA	11	95847989	95896766	protein_coding	Igf2bp1
1426	ENSMUSG00000013418	2.80281	-1.92531	1.03761	1.85553	0.0635212	NA	11	95756769	95805717	protein_coding	B4galnt2
1427	ENSMUSG00000013419	1940.82	0.0215919	0.0828074	-0.260748	0.794287	0.974199	9	121588396	121600808	protein_coding	Zbtb47
1428	ENSMUSG00000013465	869.464	0.0241517	0.0995334	-0.24265	0.808277	0.975169	2	25089724	25101501	protein_coding	Nelfb
1429	ENSMUSG00000013483	10.7887	-0.226615	0.533801	0.424532	0.671178	0.957125	11	119198594	119236201	protein_coding	Card14
1430	ENSMUSG00000013495	621.545	-0.0531166	0.0788071	0.674007	0.500307	0.918669	5	108777636	108796648	protein_coding	Tmem175
1431	ENSMUSG00000013523	1254.27	-0.127851	0.370361	0.345205	0.72994	0.96526	2	170188911	170269765	protein_coding	Bcas1
1432	ENSMUSG00000013539	1257.04	-0.0253829	0.0808314	0.314023	0.753503	0.96796	16	18118689	18165967	protein_coding	Tango2
1433	ENSMUSG00000013562	0.238011	15.7751	277.076	-0.0569343	0.954598	NA	17	31776100	31778087	lncRNA	4833413E03Rik
1434	ENSMUSG00000013584	187.655	-0.0179921	0.766877	0.0234615	0.981282	0.997277	9	71123071	71203525	protein_coding	Aldh1a2
1435	ENSMUSG00000013593	3214.46	-0.0682168	0.0787003	0.866792	0.386056	0.888978	1	171062422	171078957	protein_coding	Ndufs2
1436	ENSMUSG00000013611	1.45154	-2.54314	1.36927	1.85729	0.0632692	NA	15	36504208	36555718	protein_coding	Snx31
1437	ENSMUSG00000013622	730.257	0.0025532	0.0817268	-0.0312407	0.975078	0.996511	5	31205656	31211967	protein_coding	Atraid
1438	ENSMUSG00000013629	435.366	-0.107602	0.0973098	1.10577	0.268828	0.834524	5	31212124	31235823	protein_coding	Cad
1439	ENSMUSG00000013643	0	NA	NA	NA	NA	NA	11	58269869	58281554	protein_coding	Lypd8
1440	ENSMUSG00000013646	760.065	-0.10292	0.0815612	1.26187	0.206994	0.795846	11	58221550	58238554	protein_coding	Sh3bp5l
1441	ENSMUSG00000013653	0	NA	NA	NA	NA	NA	11	58311937	58316850	protein_coding	1810065E05Rik
1442	ENSMUSG00000013662	1661.08	0.043725	0.0709448	-0.616324	0.537681	0.927835	19	32649038	32717186	protein_coding	Atad1
1443	ENSMUSG00000013663	3058.43	0.000577111	0.0671106	-0.0085994	0.993139	0.999393	19	32734897	32803560	protein_coding	Pten
1444	ENSMUSG00000013668	0	NA	NA	NA	NA	NA	7	130739442	130748043	protein_coding	4933402N03Rik
1445	ENSMUSG00000013698	6432.98	0.0253919	0.0878893	-0.288907	0.772652	0.971801	1	172024295	172034371	protein_coding	Pea15a
1446	ENSMUSG00000013701	389.168	-0.119512	0.0977921	1.2221	0.221669	0.807101	14	31902119	31923855	protein_coding	Timm23
1447	ENSMUSG00000013707	25.6813	0.260985	0.331396	-0.787534	0.430969	0.901081	3	95046832	95049671	protein_coding	Tnfaip8l2
1448	ENSMUSG00000013736	639.876	-0.0592009	0.0783353	0.755737	0.449807	0.909441	6	106746081	106759435	protein_coding	Trnt1
1449	ENSMUSG00000013766	13.3661	-1.54995	0.624771	2.48082	0.0131079	0.302886	17	35295878	35297780	protein_coding	Ly6g6e
1450	ENSMUSG00000013787	3145.87	-0.042943	0.0784075	0.54769	0.583905	0.939151	17	35117445	35133028	protein_coding	Ehmt2
1451	ENSMUSG00000013822	499.252	-0.0829843	0.0991632	0.836845	0.40268	0.895681	9	22024285	22028468	protein_coding	Elof1
1452	ENSMUSG00000013833	794.63	-0.0261262	0.103565	0.252268	0.800834	0.974199	10	79730542	79744757	protein_coding	Med16
1453	ENSMUSG00000013846	411.433	-0.161756	0.157288	1.0284	0.303761	0.854661	15	66974724	67048679	protein_coding	St3gal1
1454	ENSMUSG00000013858	1226.97	0.0165942	0.0630953	-0.263001	0.792549	0.974199	10	79810782	79820164	protein_coding	Tmem259
1455	ENSMUSG00000013878	547.191	-0.0573857	0.0819399	0.700339	0.483716	0.916489	8	26609396	26641818	protein_coding	Rnf170
1456	ENSMUSG00000013921	10883.6	-0.1294	0.0627152	2.0633	0.0390845	0.497508	7	29991153	30007792	protein_coding	Clip3
1457	ENSMUSG00000013928	2.29155	-1.11597	1.3679	0.815827	0.414599	NA	7	29980458	29989309	transcribed_unitary_pseudogene	1700020L13Rik
1458	ENSMUSG00000013936	3.50399	1.22908	0.889733	-1.3814	0.167155	NA	5	122239014	122251535	protein_coding	Myl2
1459	ENSMUSG00000013973	100.391	0.0943265	0.213583	-0.441639	0.65875	0.954423	1	171156713	171169899	protein_coding	Dedd
1460	ENSMUSG00000013974	4.55472	-0.0540561	0.810252	0.0667151	0.946808	NA	8	3715754	3719259	protein_coding	Mcemp1
1461	ENSMUSG00000013997	683.638	-0.0545379	0.093285	0.584638	0.558791	0.932436	1	171165576	171173214	protein_coding	Nit1
1462	ENSMUSG00000014030	3.67465	-1.19658	0.823622	1.45283	0.146271	NA	4	44524757	44710487	protein_coding	Pax5
1463	ENSMUSG00000014039	447.963	-0.0839107	0.0883611	0.949634	0.342298	0.86976	16	97592667	97653050	protein_coding	Prdm15
1464	ENSMUSG00000014074	653.757	-0.0704855	0.0790956	0.891144	0.372852	0.883615	16	32096277	32120252	protein_coding	Rnf168
1465	ENSMUSG00000014075	162.998	0.220117	0.150684	-1.46079	0.144074	0.73008	16	32238520	32247917	protein_coding	Dynlt2b
1466	ENSMUSG00000014077	2633.99	-0.0962429	0.0669907	1.43666	0.150815	0.738982	2	119378178	119417508	protein_coding	Chp1
1467	ENSMUSG00000014104	0	NA	NA	NA	NA	NA	6	41829923	41841347	protein_coding	Sval2
1468	ENSMUSG00000014158	28.0297	-0.364824	0.346195	1.05381	0.29197	0.845334	5	114760213	114796482	protein_coding	Trpv4
1469	ENSMUSG00000014164	986.082	-0.331781	0.0817572	4.05812	4.95e-05	0.00851783	13	58148042	58261406	protein_coding	Klhl3
1470	ENSMUSG00000014177	307.939	0.00494348	0.104213	-0.0474361	0.962166	0.99584	11	62770281	62807606	protein_coding	Tvp23b
1471	ENSMUSG00000014195	2184.83	-0.0262585	0.0602145	0.436082	0.662777	0.954555	11	100473644	100511014	protein_coding	Dnajc7
1472	ENSMUSG00000014198	7.00527	0.631962	0.604148	-1.04604	0.295543	NA	11	100518369	100583281	protein_coding	Zfp385c
1473	ENSMUSG00000014226	863.873	-0.0546738	0.0736951	0.741892	0.458153	0.912121	1	160029937	160040445	protein_coding	Cacybp
1474	ENSMUSG00000014232	236.915	-0.135562	0.121304	1.11754	0.263764	0.832358	16	3726665	3759011	protein_coding	Cluap1
1475	ENSMUSG00000014243	101.532	0.030023	0.177711	-0.168943	0.865841	0.982098	11	62158050	62172201	protein_coding	Zswim7
1476	ENSMUSG00000014245	122.333	-0.0756141	0.168081	0.449867	0.652806	0.953243	11	62349286	62405243	protein_coding	Pigl
1477	ENSMUSG00000014294	599.602	-0.0472506	0.129787	0.364063	0.715811	0.96478	18	36875385	36877610	protein_coding	Ndufa2
1478	ENSMUSG00000014301	192.578	0.0455469	0.140046	-0.325229	0.745008	0.966213	16	4434328	4442852	protein_coding	Pam16
1479	ENSMUSG00000014303	280.597	-0.0287051	0.125169	0.22933	0.818613	0.97554	16	4412577	4442788	protein_coding	Glis2
1480	ENSMUSG00000014313	2500.1	-0.00978415	0.0841948	0.116208	0.907487	0.990686	15	35926032	35938392	protein_coding	Cox6c
1481	ENSMUSG00000014329	129.123	0.206948	0.2097	-0.986875	0.323704	0.862484	10	70758662	70995530	protein_coding	Bicc1
1482	ENSMUSG00000014349	1579.81	-0.0785921	0.0637125	1.23354	0.217373	0.804307	11	95938258	95956214	protein_coding	Ube2z
1483	ENSMUSG00000014351	0	NA	NA	NA	NA	NA	11	95915371	95921657	protein_coding	Gip
1484	ENSMUSG00000014353	612.003	-0.057686	0.0913105	0.631756	0.527546	0.926886	2	128660038	128696181	protein_coding	Tmem87b
1485	ENSMUSG00000014355	1759.78	-0.075112	0.0642089	1.16981	0.242079	0.815714	2	128452024	128529311	protein_coding	Anapc1
1486	ENSMUSG00000014361	1049.21	0.337933	0.0780411	-4.33019	1.49e-05	0.00332982	2	128540876	128644814	protein_coding	Mertk
1487	ENSMUSG00000014402	1040.56	0.06691	0.0709623	-0.942895	0.345735	0.871344	7	46538697	46569717	protein_coding	Tsg101
1488	ENSMUSG00000014418	300.582	-0.139525	0.135909	1.0266	0.304607	0.854808	7	46409890	46445488	protein_coding	Hps5
1489	ENSMUSG00000014426	1002.34	-0.064075	0.0680478	0.941619	0.346388	0.871871	17	12446508	12537683	protein_coding	Map3k4
1490	ENSMUSG00000014444	124.721	-0.142116	0.256503	0.554053	0.579543	0.937297	8	123208437	123278068	protein_coding	Piezo1
1491	ENSMUSG00000014453	0	NA	NA	NA	NA	NA	14	63610285	63654486	protein_coding	Blk
1492	ENSMUSG00000014470	538.002	0.0708505	0.103785	-0.682668	0.494817	0.917364	8	123192886	123202803	protein_coding	Rnf166
1493	ENSMUSG00000014496	1291.81	-0.0362184	0.0622421	0.581896	0.560637	0.933267	14	31420725	31552608	protein_coding	Ankrd28
1494	ENSMUSG00000014498	1593.32	-0.034138	0.0613146	0.556768	0.577686	0.937297	10	128212984	128244573	protein_coding	Ankrd52
1495	ENSMUSG00000014503	256.088	0.182328	0.161458	-1.12926	0.258788	0.830349	18	34541542	34577169	protein_coding	Pkd2l2
1496	ENSMUSG00000014504	407.662	-0.10073	0.106308	0.947525	0.343371	0.869769	18	34463900	34469652	protein_coding	Srp19
1497	ENSMUSG00000014529	0	NA	NA	NA	NA	NA	5	3701181	3730325	protein_coding	Tmbim7
1498	ENSMUSG00000014542	0.717504	-2.57941	1.7768	1.45172	0.14658	NA	6	83621524	83633169	protein_coding	Clec4f
1499	ENSMUSG00000014543	0	NA	NA	NA	NA	NA	6	129808117	129853635	protein_coding	Klra17
1500	ENSMUSG00000014547	540.482	-0.00066993	0.087759	0.00763374	0.993909	0.999456	14	63075127	63198958	protein_coding	Wdfy2
1501	ENSMUSG00000014550	1249.55	-0.0412453	0.0744034	0.554347	0.579341	0.937297	6	92163693	92191906	protein_coding	Rbsn
1502	ENSMUSG00000014551	349.371	-0.034418	0.09786	0.351706	0.725059	0.964829	6	92146506	92161014	protein_coding	Mrps25
1503	ENSMUSG00000014554	201.999	-0.194971	0.142002	1.37301	0.169748	0.759253	6	83457199	83483951	protein_coding	Dguok
1504	ENSMUSG00000014592	6988.99	0.0383987	0.0747725	-0.51354	0.607574	0.945174	4	151143982	151946333	protein_coding	Camta1
1505	ENSMUSG00000014599	415.559	0.268078	0.113671	-2.35836	0.018356	0.356559	3	107648364	107667785	protein_coding	Csf1
1506	ENSMUSG00000014601	1435.49	-0.050714	0.0632792	0.801432	0.422881	0.899932	3	107519848	107539010	protein_coding	Strip1
1507	ENSMUSG00000014602	32012.9	0.00165729	0.0729631	-0.0227141	0.981878	0.997308	1	92943186	93029673	protein_coding	Kif1a
1508	ENSMUSG00000014603	15.9903	-0.471377	0.456728	1.03207	0.302037	0.853838	3	107502347	107513092	protein_coding	Alx3
1509	ENSMUSG00000014606	1570.7	-0.106381	0.0611838	1.73871	0.0820854	0.634026	11	70535022	70538305	protein_coding	Slc25a11
1510	ENSMUSG00000014609	1.15954	-3.29267	1.87757	1.75369	0.0794843	NA	11	70505709	70510042	protein_coding	Chrne
1511	ENSMUSG00000014633	185.118	-0.184965	0.1368	1.35209	0.176347	0.765053	8	117615424	117648194	protein_coding	Cmc2
1512	ENSMUSG00000014668	618.856	0.0136738	0.0836908	-0.163385	0.870216	0.98268	5	110283708	110319838	protein_coding	Chfr
1513	ENSMUSG00000014686	4.70567	-0.136461	0.729905	0.186957	0.851694	NA	7	19586022	19595224	protein_coding	Ceacam16
1514	ENSMUSG00000014704	0	NA	NA	NA	NA	NA	6	52139397	52141811	protein_coding	Hoxa2
1515	ENSMUSG00000014725	0.460809	-16.0776	193.631	0.0830319	0.933826	NA	14	68843476	68893291	protein_coding	Adam28
1516	ENSMUSG00000014747	21.991	0.518858	0.370067	-1.40207	0.160896	0.752728	6	83739626	83745308	protein_coding	Ankrd53
1517	ENSMUSG00000014748	616.368	0.0844861	0.0830994	-1.01669	0.309302	0.855313	6	83745867	83752795	protein_coding	Tex261
1518	ENSMUSG00000014763	1092.15	0.0585765	0.0703421	-0.832737	0.404993	0.89611	17	15616464	15653845	protein_coding	Fam120b
1519	ENSMUSG00000014767	501.614	0.0345893	0.0924783	-0.374026	0.708385	0.96478	17	15720150	15748641	protein_coding	Tbp
1520	ENSMUSG00000014769	1506.93	0.0479858	0.0630771	-0.760749	0.446807	0.90941	17	15695283	15720013	protein_coding	Psmb1
1521	ENSMUSG00000014771	0	NA	NA	NA	NA	NA	17	15739470	15747563	protein_coding	Pdcd2
1522	ENSMUSG00000014773	66.0089	-0.160632	0.293279	0.54771	0.583891	0.939151	17	15587616	15597134	protein_coding	Dll1
1523	ENSMUSG00000014776	192.937	0.0689836	0.164367	-0.419694	0.674709	0.958172	8	106002772	106008571	protein_coding	Nol3
1524	ENSMUSG00000014778	151.307	0.434446	0.171383	-2.53495	0.0112464	0.286963	8	106055795	106074585	protein_coding	Fhod1
1525	ENSMUSG00000014782	34.7809	-0.109779	0.328235	0.334453	0.738037	0.965778	8	106099906	106109494	protein_coding	Plekhg4
1526	ENSMUSG00000014786	861.638	0.00494674	0.0972404	-0.0508713	0.959428	0.99584	8	106075475	106096513	protein_coding	Slc9a5
1527	ENSMUSG00000014791	86.1438	-0.114601	0.191137	0.599574	0.54879	0.930684	8	106032233	106037392	protein_coding	Elmo3
1528	ENSMUSG00000014813	92.9502	0.781839	0.193594	-4.03856	5.38e-05	0.00879475	14	69266687	69279253	protein_coding	Stc1
1529	ENSMUSG00000014837	331.288	-0.0458941	0.114744	0.399969	0.689179	0.961302	8	106007041	106016496	protein_coding	Matcap1
1530	ENSMUSG00000014846	293.304	0.0656121	0.169874	-0.386239	0.699319	0.964109	8	106194125	106198158	protein_coding	Tppp3
1531	ENSMUSG00000014850	375.64	0.093338	0.099613	-0.937006	0.348756	0.873376	13	92348380	92491511	protein_coding	Msh3
1532	ENSMUSG00000014852	22.3474	-0.0194998	0.35284	0.0552652	0.955927	0.995659	2	26863428	26899640	protein_coding	Adamts13
1533	ENSMUSG00000014856	217.279	-0.0954935	0.129104	0.739665	0.459503	0.912136	8	106052986	106061851	protein_coding	Tmem208
1534	ENSMUSG00000014859	565.984	0.00917314	0.0810361	-0.113198	0.909873	0.990686	8	106024295	106032002	protein_coding	E2f4
1535	ENSMUSG00000014867	1027.64	0.0369238	0.0764849	-0.482759	0.629267	0.949655	2	26810052	26823940	protein_coding	Surf4
1536	ENSMUSG00000014873	490.183	-0.0398159	0.0852786	0.466893	0.640577	0.950716	2	26806379	26810195	protein_coding	Surf2
1537	ENSMUSG00000014905	653.824	-0.0318664	0.0838933	0.379844	0.704061	0.964754	12	44252342	44257109	protein_coding	Dnajb9
1538	ENSMUSG00000014907	203.923	0.0466652	0.156124	-0.298898	0.765018	0.969703	8	67312869	67343216	protein_coding	Naf1
1539	ENSMUSG00000014932	173.614	0.250121	0.182306	-1.37199	0.170068	0.759253	5	32768515	32844401	protein_coding	Yes1
1540	ENSMUSG00000014956	4308.01	-0.0039255	0.0696506	0.0563599	0.955055	0.995659	5	32616187	32674777	protein_coding	Ppp1cb
1541	ENSMUSG00000014959	1573.06	-0.0854103	0.0655337	1.3033	0.192471	0.782998	2	70491920	70542980	protein_coding	Gorasp2
1542	ENSMUSG00000014980	281.912	-0.0866704	0.109582	0.790917	0.428992	0.900255	1	152246486	152262439	protein_coding	Tsen15
1543	ENSMUSG00000015001	0.470174	16.626	271.063	-0.0613361	0.951092	NA	15	65747902	65784246	protein_coding	Oc90
1544	ENSMUSG00000015002	3013.53	-0.0851265	0.282526	0.301305	0.763182	0.969208	15	65658883	65745665	protein_coding	Efr3a
1545	ENSMUSG00000015013	444.56	-0.0964432	0.120575	0.799857	0.423793	0.899932	8	123338379	123343399	protein_coding	Trappc2l
1546	ENSMUSG00000015016	341.074	-0.00677126	0.10719	0.0631707	0.949631	0.995659	8	123502225	123544619	protein_coding	Acsf3
1547	ENSMUSG00000015023	356.951	0.00905666	0.0983518	-0.0920844	0.926631	0.992919	8	111701628	111724432	protein_coding	Ddx19a
1548	ENSMUSG00000015027	138.487	0.187597	0.187634	-0.999801	0.317407	0.859488	8	123304981	123338202	protein_coding	Galns
1549	ENSMUSG00000015053	57.975	0.14906	0.298408	-0.499516	0.617416	0.947564	6	88170873	88184014	protein_coding	Gata2
1550	ENSMUSG00000015083	68.7151	0.240311	0.237202	-1.01311	0.311009	0.856098	2	25388663	25391731	protein_coding	C8g
1551	ENSMUSG00000015085	109.645	-0.122145	0.176401	0.692427	0.488669	0.916489	2	25285886	25291333	protein_coding	Entpd2
1552	ENSMUSG00000015087	2906.4	-0.0148501	0.0593816	0.25008	0.802526	0.974306	2	25473030	25498533	protein_coding	Rabl6
1553	ENSMUSG00000015090	15419.7	0.0915875	0.746635	-0.122667	0.902371	0.990117	2	25356721	25360058	protein_coding	Ptgds
1554	ENSMUSG00000015092	989.721	0.0219351	0.0726959	-0.301738	0.762852	0.969208	2	25447859	25452094	protein_coding	Edf1
1555	ENSMUSG00000015093	24.4762	0.148506	0.35266	-0.421102	0.67368	0.958172	2	25346850	25348788	protein_coding	Clic3
1556	ENSMUSG00000015094	3078.71	-0.0965486	0.0717477	1.34567	0.178409	0.76619	2	25289363	25299506	protein_coding	Npdc1
1557	ENSMUSG00000015095	1924.04	0.0372478	0.0617394	-0.603306	0.546305	0.929477	2	25390762	25395483	protein_coding	Fbxw5
1558	ENSMUSG00000015112	31.5853	-0.0816548	0.304106	0.268508	0.788308	0.973368	6	6041218	6217173	protein_coding	Slc25a13
1559	ENSMUSG00000015120	1224.51	-0.0349336	0.0676947	0.516047	0.605822	0.944714	17	25479482	25493856	protein_coding	Ube2i
1560	ENSMUSG00000015126	203.805	-0.0361446	0.139975	0.258221	0.796236	0.974199	17	25459141	25461773	protein_coding	Tsr3
1561	ENSMUSG00000015127	326.442	-0.154793	0.115351	1.34193	0.179619	0.767931	17	25407371	25453417	protein_coding	Unkl
1562	ENSMUSG00000015133	134.978	0.0338807	0.247207	-0.137054	0.890988	0.986519	7	65876660	66038098	protein_coding	Lrrk1
1563	ENSMUSG00000015134	28.3209	-1.42331	0.560605	2.53888	0.0111208	0.286226	7	66040638	66077265	protein_coding	Aldh1a3
1564	ENSMUSG00000015143	1553.2	-0.0402351	0.129762	0.310069	0.756508	0.968346	12	80214321	80307145	protein_coding	Actn1
1565	ENSMUSG00000015149	2003.32	-0.0492686	0.0692571	0.711387	0.476845	0.916466	7	28466160	28488086	protein_coding	Sirt2
1566	ENSMUSG00000015165	3651.71	0.0834407	0.0692839	-1.20433	0.228462	0.810307	7	28507966	28521691	protein_coding	Hnrnpl
1567	ENSMUSG00000015176	1085.7	-0.122254	0.0654007	1.86931	0.0615803	0.573057	19	46064302	46073969	protein_coding	Nolc1
1568	ENSMUSG00000015189	994.534	-0.182893	0.0709131	2.57911	0.00990555	0.271689	6	4600839	4643355	protein_coding	Casd1
1569	ENSMUSG00000015202	57.8057	-0.0599468	0.263434	0.227559	0.819989	0.97554	10	7069063	7162237	protein_coding	Cnksr3
1570	ENSMUSG00000015214	782.691	-0.151491	0.0915472	1.65479	0.097967	0.662253	X	70408366	70462802	protein_coding	Mtmr1
1571	ENSMUSG00000015217	330.104	0.0481565	0.100788	-0.477801	0.632792	0.949897	X	70599524	70604282	protein_coding	Hmgb3
1572	ENSMUSG00000015222	22186.6	-0.0740983	0.0566601	1.30777	0.190952	0.781193	1	66214432	66481742	protein_coding	Map2
1573	ENSMUSG00000015224	414.505	0.252107	0.0953415	-2.64425	0.0081872	0.249891	4	96456666	96479815	protein_coding	Cyp2j9
1574	ENSMUSG00000015242	0	NA	NA	NA	NA	NA	4	52989272	53001162	protein_coding	Nipsnap3a
1575	ENSMUSG00000015243	887.392	0.239852	0.0888015	-2.70099	0.0069134	0.226283	4	53030787	53159895	protein_coding	Abca1
1576	ENSMUSG00000015247	117.227	-0.251947	0.191145	1.31809	0.187473	0.776072	4	53011880	53022060	protein_coding	Nipsnap3b
1577	ENSMUSG00000015289	183.831	0.223808	0.140354	-1.5946	0.110802	0.683515	X	73394882	73397224	protein_coding	Lage3
1578	ENSMUSG00000015290	1263.67	-0.073169	0.0824135	0.887827	0.374634	0.884151	X	73409324	73416824	protein_coding	Ubl4a
1579	ENSMUSG00000015291	9937.18	-0.0495347	0.065989	0.750651	0.452863	0.909901	X	73348604	73355468	protein_coding	Gdi1
1580	ENSMUSG00000015305	1304.63	0.190469	0.0771078	-2.47016	0.0135052	0.305463	10	8597983	8761814	protein_coding	Sash1
1581	ENSMUSG00000015312	99.3091	0.50465	0.290759	-1.73563	0.0826288	0.635488	10	80765907	80768038	protein_coding	Gadd45b
1582	ENSMUSG00000015314	3.83609	-0.0358417	0.909033	0.0394283	0.968549	NA	1	171745082	171780737	protein_coding	Slamf6
1583	ENSMUSG00000015316	8.57887	0.0937127	0.603363	-0.155317	0.876571	0.984143	1	171594695	171628752	protein_coding	Slamf1
1584	ENSMUSG00000015335	61.1626	-0.243472	0.265658	0.916488	0.359411	0.879219	2	29980956	29983660	protein_coding	Zdhhc12
1585	ENSMUSG00000015337	23.0659	-0.0843595	0.37189	0.22684	0.820548	0.97554	2	30061505	30064081	protein_coding	Endog
1586	ENSMUSG00000015340	16.1716	0.621877	0.434765	-1.43037	0.15261	0.743708	X	9301491	9354010	protein_coding	Cybb
1587	ENSMUSG00000015341	988.983	-0.0666043	0.0680832	0.978277	0.327937	0.864683	8	23731362	23747090	protein_coding	Golga7
1588	ENSMUSG00000015342	455.248	-0.0486328	0.0903819	0.538081	0.590521	0.940285	X	9138995	9179489	protein_coding	Xk
1589	ENSMUSG00000015354	74.0661	0.0353761	0.310627	-0.113886	0.909328	0.990686	9	95519654	95580149	protein_coding	Pcolce2
1590	ENSMUSG00000015355	12.3555	0.175269	0.546228	-0.320871	0.748308	0.966489	1	171509577	171532826	protein_coding	Cd48
1591	ENSMUSG00000015357	440.242	0.100528	0.10775	-0.932969	0.350836	0.874712	9	65201542	65237940	protein_coding	Clpx
1592	ENSMUSG00000015363	326.464	-0.0812535	0.103341	0.786265	0.431712	0.90124	15	88959327	88971280	protein_coding	Trabd
1593	ENSMUSG00000015365	1.97599	-0.503379	1.36963	0.367529	0.713224	NA	15	88867112	88939355	protein_coding	Mov10l1
1594	ENSMUSG00000015377	1683.13	0.110303	0.0854879	-1.29027	0.196957	0.787694	15	89066416	89080699	protein_coding	Dennd6b
1595	ENSMUSG00000015396	251.038	-0.0526813	0.134124	0.392781	0.694481	0.963196	13	43938251	43956608	protein_coding	Cd83
1596	ENSMUSG00000015401	0.153393	-15.0572	196.1	0.076783	0.938796	NA	X	162871826	162901856	protein_coding	Cltrn
1597	ENSMUSG00000015405	20.0765	0.261571	0.471469	-0.5548	0.579031	0.937297	X	162922328	162971416	protein_coding	Ace2
1598	ENSMUSG00000015437	0.306785	-15.9988	193.804	0.0825512	0.934208	NA	14	56496295	56499717	protein_coding	Gzmb
1599	ENSMUSG00000015441	0	NA	NA	NA	NA	NA	14	56442720	56448874	protein_coding	Gzmf
1600	ENSMUSG00000015443	0	NA	NA	NA	NA	NA	14	56403254	56412056	protein_coding	Gzmn
1601	ENSMUSG00000015451	48.1421	0.157699	0.312596	-0.504482	0.613923	0.946678	17	35028069	35042440	protein_coding	C4a
1602	ENSMUSG00000015452	10.6736	0.978354	0.513644	-1.90473	0.0568147	0.562319	17	34816836	34819910	protein_coding	Ager
1603	ENSMUSG00000015461	810.77	0.00197356	0.131187	-0.0150439	0.987997	0.998489	17	34866120	34874048	protein_coding	Atf6b
1604	ENSMUSG00000015467	11.4123	0.304676	0.477111	-0.638584	0.523093	0.924736	17	34832323	34834945	protein_coding	Egfl8
1605	ENSMUSG00000015468	92.7427	0.0804766	0.241367	-0.33342	0.738818	0.965913	17	34783242	34807477	protein_coding	Notch4
1606	ENSMUSG00000015474	237.507	-0.0491402	0.12731	0.385989	0.699505	0.964109	17	34835636	34847484	protein_coding	Ppt2
1607	ENSMUSG00000015476	1857.33	-0.161833	0.102069	1.58553	0.112847	0.68597	17	34848507	34852100	protein_coding	Prrt1
1608	ENSMUSG00000015478	279.6	-0.0109523	0.114715	0.0954738	0.923938	0.992546	17	34820065	34822664	protein_coding	Rnf5
1609	ENSMUSG00000015484	149.968	0.131568	0.184166	-0.714402	0.474979	0.916193	1	155951712	156032596	protein_coding	Fam163a
1610	ENSMUSG00000015488	675.791	-0.0194142	0.0770727	0.251894	0.801123	0.974199	2	26899938	26911101	protein_coding	Cacfd1
1611	ENSMUSG00000015501	7550.05	-0.114633	0.0707173	1.62101	0.105016	0.675806	10	13841819	14027118	protein_coding	Hivep2
1612	ENSMUSG00000015519	0	NA	NA	NA	NA	NA	10	28848284	28862299	protein_coding	2310057J18Rik
1613	ENSMUSG00000015522	964.607	0.0117722	0.0916665	-0.128424	0.897813	0.989556	3	95341699	95404551	protein_coding	Arnt
1614	ENSMUSG00000015533	4.58548	1.00668	0.872395	-1.15393	0.248528	NA	13	114969617	115068636	protein_coding	Itga2
1615	ENSMUSG00000015536	615.225	0.124082	0.0792055	-1.56658	0.117212	0.691058	13	114954772	114968811	protein_coding	Mocs2
1616	ENSMUSG00000015542	249.662	-0.0945161	0.122874	0.769214	0.441766	0.908149	11	115073658	115078685	protein_coding	Nat9
1617	ENSMUSG00000015568	353.058	0.376043	0.19697	-1.90913	0.056245	0.559819	8	69333143	69360100	protein_coding	Lpl
1618	ENSMUSG00000015575	369.023	0.287444	0.127767	-2.24974	0.0244652	0.41457	17	26882205	26918621	protein_coding	Atp6v0e
1619	ENSMUSG00000015579	0	NA	NA	NA	NA	NA	17	27057638	27063983	protein_coding	Nkx2-5
1620	ENSMUSG00000015597	1405.61	0.0819922	0.0756802	-1.0834	0.278629	0.841127	17	46694657	46731846	protein_coding	Zfp318
1621	ENSMUSG00000015599	4226.06	0.00956769	0.0623149	-0.153538	0.877974	0.98422	17	46753374	46798601	protein_coding	Ttbk1
1622	ENSMUSG00000015605	579.954	-0.038887	0.105081	0.370066	0.711333	0.96478	17	46859255	46867101	protein_coding	Srf
1623	ENSMUSG00000015619	0.710502	1.45306	1.85157	-0.784774	0.432586	NA	2	9861889	9894845	protein_coding	Gata3
1624	ENSMUSG00000015627	0	NA	NA	NA	NA	NA	2	179966926	179976492	protein_coding	Gata5
1625	ENSMUSG00000015647	304.255	0.0388267	0.146655	-0.264749	0.791203	0.974199	2	179818166	179867652	protein_coding	Lama5
1626	ENSMUSG00000015652	2.08056	0.98602	1.08355	-0.909994	0.362826	NA	5	5786317	5799326	protein_coding	Steap1
1627	ENSMUSG00000015653	280.866	-0.00496714	0.142356	0.0348923	0.972166	0.996273	5	5714829	5744578	protein_coding	Steap2
1628	ENSMUSG00000015656	23275.6	-0.0312397	0.0670798	0.46571	0.641423	0.950927	9	40712280	40721383	protein_coding	Hspa8
1629	ENSMUSG00000015659	438.427	0.0172768	0.106274	-0.162568	0.870858	0.98268	17	6092471	6130016	protein_coding	Serac1
1630	ENSMUSG00000015665	0	NA	NA	NA	NA	NA	X	99615857	99621811	protein_coding	Awat1
1631	ENSMUSG00000015668	386.035	0.00375228	0.106699	-0.0351669	0.971947	0.996149	X	99666489	99670174	protein_coding	Pdzd11
1632	ENSMUSG00000015671	1212.41	-0.00463859	0.0664692	0.0697856	0.944364	0.995337	13	14787825	14848821	protein_coding	Psma2
1633	ENSMUSG00000015672	240.657	0.0519358	0.121016	-0.429166	0.667802	0.956454	13	14782769	14787750	protein_coding	Mrpl32
1634	ENSMUSG00000015697	949.737	-0.0343684	0.0741611	0.463429	0.643057	0.951763	3	95230836	95264513	protein_coding	Setdb1
1635	ENSMUSG00000015702	12.4036	-0.952747	0.457315	2.08335	0.0372193	0.488611	3	95203407	95214487	protein_coding	Anxa9
1636	ENSMUSG00000015709	8537.04	-0.108411	0.0562451	1.92748	0.05392	0.550646	7	83895486	84059384	protein_coding	Arnt2
1637	ENSMUSG00000015711	559.906	-0.0993333	0.0814229	1.21997	0.222477	0.807785	3	95160985	95189387	protein_coding	Prune1
1638	ENSMUSG00000015714	682.943	-0.00317604	0.0842712	0.0376883	0.969936	0.99613	3	95222102	95230910	protein_coding	Cers2
1639	ENSMUSG00000015721	0	NA	NA	NA	NA	NA	7	23085314	23141347	protein_coding	Nlrp5
1640	ENSMUSG00000015733	3256.12	0.0449554	0.0691264	-0.650336	0.515475	0.921795	6	17636233	17666971	protein_coding	Capza2
1641	ENSMUSG00000015745	879.626	0.022495	0.0752998	-0.29874	0.765139	0.969703	3	95895741	95903313	protein_coding	Plekho1
1642	ENSMUSG00000015747	606.202	-0.119145	0.0864779	1.37775	0.168281	0.759101	3	95907144	95965778	protein_coding	Vps45
1643	ENSMUSG00000015748	419.3	-0.0316269	0.0905182	0.349399	0.72679	0.964829	3	95737436	95763197	protein_coding	Prpf3
1644	ENSMUSG00000015749	1677.65	-0.0580132	0.0649573	0.893097	0.371805	0.88307	3	95836558	95854702	protein_coding	Anp32e
1645	ENSMUSG00000015750	418.889	0.00493698	0.0931866	-0.0529794	0.957748	0.99584	3	95801281	95805600	protein_coding	Aph1a
1646	ENSMUSG00000015755	1204.03	0.0776311	0.0799195	-0.971366	0.331366	0.864683	10	7781417	7831994	protein_coding	Tab2
1647	ENSMUSG00000015757	726.548	-0.0779638	0.075767	1.02899	0.303483	0.854388	10	7668655	7698899	protein_coding	Ppil4
1648	ENSMUSG00000015759	831.572	-0.00301672	0.0793306	0.0380271	0.969666	0.99613	14	47013024	47025868	protein_coding	Cnih1
1649	ENSMUSG00000015766	498.412	-0.0440545	0.100555	0.438112	0.661305	0.954522	6	137454243	137631874	protein_coding	Eps8
1650	ENSMUSG00000015776	495.432	-0.0353384	0.0894529	0.395051	0.692805	0.962578	2	26795274	26800689	protein_coding	Med22
1651	ENSMUSG00000015787	0	NA	NA	NA	NA	NA	2	26732515	26754991	protein_coding	Abo
1652	ENSMUSG00000015790	807.821	0.0690934	0.0787867	-0.876968	0.380504	0.88594	2	26803393	26806542	protein_coding	Surf1
1653	ENSMUSG00000015804	692.969	-0.039922	0.100236	0.39828	0.690424	0.96207	5	45677571	45686618	protein_coding	Med28
1654	ENSMUSG00000015806	1129.19	-0.0257841	0.136639	0.188702	0.850327	0.979996	5	45591363	45607578	protein_coding	Qdpr
1655	ENSMUSG00000015812	8.18114	-0.0806846	0.598914	0.134718	0.892835	0.986964	14	67982630	67986888	protein_coding	Gnrh1
1656	ENSMUSG00000015829	4391.61	-0.0972278	0.0567426	1.71349	0.0866228	0.643728	1	159351339	159759299	protein_coding	Tnr
1657	ENSMUSG00000015837	7456.69	0.00041998	0.0572726	-0.007333	0.994149	0.999532	11	50090193	50101654	protein_coding	Sqstm1
1658	ENSMUSG00000015839	236.784	0.0271577	0.168424	-0.161245	0.8719	0.98276	2	75505857	75534985	protein_coding	Nfe2l2
1659	ENSMUSG00000015843	29.9847	-0.0311524	0.385937	0.0807189	0.935665	0.99328	1	167425953	167467192	protein_coding	Rxrg
1660	ENSMUSG00000015846	594.212	0.0146078	0.0982375	-0.148699	0.881792	0.984814	2	27566452	27652969	protein_coding	Rxra
1661	ENSMUSG00000015850	135.868	-0.110771	0.222279	0.498341	0.618244	0.947712	3	95583511	95595228	protein_coding	Adamtsl4
1662	ENSMUSG00000015852	411.76	-0.141986	0.174552	0.81343	0.415972	0.898454	3	87158065	87171045	protein_coding	Fcrl2
1663	ENSMUSG00000015854	0	NA	NA	NA	NA	NA	3	87265188	87278380	protein_coding	Cd5l
1664	ENSMUSG00000015869	508.072	0.00448748	0.104338	-0.0430091	0.965694	0.99584	11	116361671	116385461	protein_coding	Prpsap1
1665	ENSMUSG00000015879	144.696	-0.0137402	0.192366	0.0714272	0.943058	0.994864	5	45687047	45796956	protein_coding	Fam184b
1666	ENSMUSG00000015880	6.81882	-0.00826346	0.602924	0.0137056	0.989065	NA	5	45827261	45857888	protein_coding	Ncapg
1667	ENSMUSG00000015882	335.393	-0.0026163	0.112839	0.0231862	0.981502	0.997277	5	45854523	46014957	protein_coding	Lcorl
1668	ENSMUSG00000015889	609.19	0.0201041	0.0877828	-0.22902	0.818853	0.97554	10	93289273	93320737	protein_coding	Lta4h
1669	ENSMUSG00000015890	3.42071	-0.971333	0.909087	1.06847	0.285308	NA	10	93359200	93375895	protein_coding	Amdhd1
1670	ENSMUSG00000015932	1806.09	-0.0987607	0.0620925	1.59054	0.111713	0.683515	2	143757240	143785244	protein_coding	Dstn
1671	ENSMUSG00000015937	718.319	-0.136761	0.0877702	1.55817	0.119194	0.692503	13	56221432	56284174	protein_coding	Macroh2a1
1672	ENSMUSG00000015942	388.26	0.146007	0.0971219	-1.50334	0.132753	0.716823	5	134212858	134253209	protein_coding	Gtf2ird2
1673	ENSMUSG00000015943	45.2709	0.140943	0.31885	-0.442036	0.658463	0.954423	3	96103904	96127025	protein_coding	Bola1
1674	ENSMUSG00000015944	3373.19	-0.117534	0.0712402	1.64982	0.0989795	0.663508	5	134128550	134173182	protein_coding	Castor2
1675	ENSMUSG00000015947	49.19	-0.0243812	0.257006	0.0948665	0.924421	0.99273	3	96190225	96201285	protein_coding	Fcgr1
1676	ENSMUSG00000015950	93.6191	0.226756	0.191744	-1.1826	0.236969	0.812802	5	134248907	134258479	protein_coding	Ncf1
1677	ENSMUSG00000015957	4.21358	-0.368927	0.805486	0.458018	0.646939	NA	7	98484319	98504402	protein_coding	Wnt11
1678	ENSMUSG00000015961	1461.05	-0.0936971	0.0657248	1.4256	0.153985	0.745972	1	177590528	177624077	protein_coding	Adss2
1679	ENSMUSG00000015962	2.19081	1.63027	1.14279	-1.42657	0.153704	NA	1	177557380	177580890	protein_coding	Spmip3
1680	ENSMUSG00000015966	24.8383	-0.0107672	0.327267	0.0329003	0.973754	0.996483	14	29718092	29730853	protein_coding	Il17rb
1681	ENSMUSG00000015968	1435	-0.049271	0.0823074	0.598622	0.549425	0.930732	14	29761896	30213412	protein_coding	Cacna1d
1682	ENSMUSG00000015970	64.4262	-0.0993719	0.219168	0.453404	0.650258	0.952907	14	29730980	29762484	protein_coding	Chdh
1683	ENSMUSG00000015971	940.132	-0.0332432	0.0705283	0.471346	0.637394	0.949948	14	29700294	29728311	protein_coding	Actr8
1684	ENSMUSG00000015980	170.087	0.247354	0.143721	-1.72107	0.0852386	0.639267	7	138792904	138822895	protein_coding	Lrrc27
1685	ENSMUSG00000015981	2371.63	-0.228147	0.0923672	2.47	0.0135112	0.305463	7	138683554	138793223	protein_coding	Stk32c
1686	ENSMUSG00000015994	664.825	0.0329268	0.0847361	-0.38858	0.697587	0.964109	8	26488750	26505678	protein_coding	Fnta
1687	ENSMUSG00000016018	1013.99	0.0261569	0.0738371	-0.354252	0.72315	0.964829	13	113003952	113063932	protein_coding	Mtrex
1688	ENSMUSG00000016024	31.2437	-1.10245	0.899282	1.22592	0.220228	0.806201	2	158148413	158174772	protein_coding	Lbp
1689	ENSMUSG00000016028	191.531	0.0627358	0.154881	-0.405057	0.685436	0.960827	15	85783130	85918404	protein_coding	Celsr1
1690	ENSMUSG00000016087	56.2283	0.248219	0.280763	-0.884085	0.37665	0.885123	9	32333500	32454157	protein_coding	Fli1
1691	ENSMUSG00000016128	174.777	-0.0721535	0.150152	0.480536	0.630846	0.949897	5	150960975	151157301	protein_coding	Stard13
1692	ENSMUSG00000016150	545.418	-0.289977	0.0979821	2.95949	0.0030815	0.146264	X	41616743	42518003	protein_coding	Tenm1
1693	ENSMUSG00000016179	728.4	-0.406402	0.118561	3.42779	0.000608517	0.057152	1	193028654	193052606	protein_coding	Camk1g
1694	ENSMUSG00000016181	406.421	0.134427	0.106759	-1.25917	0.207969	0.796749	1	192773412	192812580	protein_coding	Utp25
1695	ENSMUSG00000016194	345.151	0.0727447	0.165804	-0.438738	0.660851	0.954522	1	192903942	192946383	protein_coding	Hsd11b1
1696	ENSMUSG00000016200	448.341	0.0932118	0.134027	-0.695469	0.486761	0.916489	1	192573541	192718083	protein_coding	Syt14
1697	ENSMUSG00000016206	65.5259	-0.0199918	0.267269	0.0748003	0.940374	0.99421	17	37581111	37585375	protein_coding	H2-M3
1698	ENSMUSG00000016239	87.6462	0.376539	0.204298	-1.84308	0.065317	0.584542	X	35592006	35625994	protein_coding	Lonrf3
1699	ENSMUSG00000016252	662.207	-0.182754	0.110637	1.65183	0.0985693	0.6633	2	174302865	174305898	protein_coding	Atp5f1e
1700	ENSMUSG00000016253	702.106	-0.0108893	0.0845364	0.128812	0.897507	0.98946	2	174257597	174269295	protein_coding	Nelfcd
1701	ENSMUSG00000016255	1.08374	-0.569742	1.56693	0.363603	0.716155	NA	2	174292488	174299675	protein_coding	Tubb1
1702	ENSMUSG00000016256	550.561	-0.113367	0.0822507	1.37831	0.168109	0.759101	2	174269286	174280832	protein_coding	Ctsz
1703	ENSMUSG00000016257	697.411	0.0929618	0.0763088	-1.21823	0.223136	0.808712	2	174306860	174314874	protein_coding	Prelid3b
1704	ENSMUSG00000016262	362.331	0.116689	0.13503	-0.864169	0.387495	0.890497	1	192526796	192538064	protein_coding	Sertad4
1705	ENSMUSG00000016283	0	NA	NA	NA	NA	NA	17	37791742	37794443	protein_coding	H2-M2
1706	ENSMUSG00000016308	523.416	0.0308442	0.124492	-0.247761	0.80432	0.974743	X	36064828	36147875	protein_coding	Ube2a
1707	ENSMUSG00000016319	3046.97	-0.065816	0.0839023	0.784437	0.432784	0.901728	X	36059304	36062460	protein_coding	Slc25a5
1708	ENSMUSG00000016327	0.120467	14.8684	283.949	-0.0523627	0.95824	NA	X	37405061	37425646	protein_coding	Atp1b4
1709	ENSMUSG00000016344	311.318	0.0108892	0.122617	-0.0888066	0.929236	0.993013	2	180829040	180830564	protein_coding	Ppdpf
1710	ENSMUSG00000016346	10821.8	-0.0649701	0.0673423	0.964774	0.334658	0.866049	2	180717372	180777093	protein_coding	Kcnq2
1711	ENSMUSG00000016349	17314	-0.0860256	0.0648546	1.32644	0.184695	0.773264	2	180778581	180798807	protein_coding	Eef1a2
1712	ENSMUSG00000016356	127.493	-0.401572	0.191711	2.09467	0.0362003	0.48467	2	180628328	180660156	protein_coding	Col20a1
1713	ENSMUSG00000016382	2274.06	-0.135888	0.0598997	2.26859	0.0232932	0.40638	X	74829260	74918788	protein_coding	Pls3
1714	ENSMUSG00000016386	425.125	-0.306756	0.0897601	3.41751	0.000631965	0.0586967	2	106523614	106698701	protein_coding	Mpped2
1715	ENSMUSG00000016409	212.127	-0.132149	0.142838	0.925167	0.354879	0.877352	X	36390448	36414399	protein_coding	Nkap
1716	ENSMUSG00000016427	480.563	-0.0406686	0.091936	0.442358	0.65823	0.954423	X	36451241	36454816	protein_coding	Ndufa1
1717	ENSMUSG00000016458	5.50162	0.252791	0.73134	-0.345655	0.729602	NA	2	104956874	105003961	protein_coding	Wt1
1718	ENSMUSG00000016477	523.864	-0.111673	0.0875432	1.27564	0.202084	0.791228	13	30090558	30170046	protein_coding	E2f3
1719	ENSMUSG00000016481	343.213	0.270944	0.115057	-2.35488	0.0185288	0.358732	1	194779690	194813894	protein_coding	Cr1l
1720	ENSMUSG00000016487	836.834	0.0150401	0.118477	-0.126946	0.898983	0.989707	6	146789985	146933523	protein_coding	Ppfibp1
1721	ENSMUSG00000016493	177.186	0.0448971	0.181791	-0.246972	0.80493	0.97487	1	194719134	194774557	protein_coding	Cd46
1722	ENSMUSG00000016494	2218.27	-0.052996	0.112942	0.469233	0.638903	0.950215	1	194621127	194643587	protein_coding	Cd34
1723	ENSMUSG00000016495	232.901	0.176341	0.128843	-1.36865	0.171107	0.759923	19	29325999	29344790	protein_coding	Plgrkt
1724	ENSMUSG00000016496	34.5864	0.564879	0.293015	-1.92782	0.0538779	0.550646	19	29344855	29365495	protein_coding	Cd274
1725	ENSMUSG00000016498	0.835173	0.565268	2.01505	-0.280523	0.779076	NA	19	29388319	29448561	protein_coding	Pdcd1lg2
1726	ENSMUSG00000016503	62.5025	-0.0986364	0.2241	0.440144	0.659833	0.954522	5	146885467	146892424	protein_coding	Gtf3a
1727	ENSMUSG00000016510	191.168	0.129764	0.135978	-0.954306	0.339929	0.869737	5	146888383	146900610	protein_coding	Mtif3
1728	ENSMUSG00000016520	68.719	-0.0601241	0.213753	0.281278	0.778497	0.972852	5	146953465	147013396	protein_coding	Lnx2
1729	ENSMUSG00000016524	0.148856	-15.0549	196.106	0.0767694	0.938807	NA	1	130860393	130867852	protein_coding	Il19
1730	ENSMUSG00000016526	144.425	0.562269	0.183895	-3.05756	0.00223147	0.122364	1	131055192	131066077	protein_coding	Dyrk3
1731	ENSMUSG00000016528	484.994	-0.0291756	0.0857883	0.340089	0.73379	0.96526	1	130981437	131025563	protein_coding	Mapkapk2
1732	ENSMUSG00000016529	0	NA	NA	NA	NA	NA	1	130947582	130952711	protein_coding	Il10
1733	ENSMUSG00000016534	1286.23	0.126647	0.0799809	-1.58347	0.113314	0.686073	X	37490234	37545331	protein_coding	Lamp2
1734	ENSMUSG00000016541	3174.48	-0.117917	0.0572024	2.06139	0.0392656	0.497597	15	85220446	85347413	protein_coding	Atxn10
1735	ENSMUSG00000016552	540.494	0.202618	0.0851405	-2.3798	0.0173219	0.344817	15	77824722	77840922	protein_coding	Foxred2
1736	ENSMUSG00000016554	564.656	-0.0576593	0.089915	0.641264	0.521351	0.923505	15	77843198	77855013	protein_coding	Eif3d
1737	ENSMUSG00000016559	1897.95	-0.0347477	0.0737911	0.470893	0.637717	0.949948	11	115912738	115918788	protein_coding	H3f3b
1738	ENSMUSG00000016619	646.978	0.089686	0.0924278	-0.970336	0.331879	0.864683	15	84807612	84827164	protein_coding	Nup50
1739	ENSMUSG00000016624	309.987	-0.09066	0.121787	0.744415	0.456625	0.911416	15	84669582	84740250	protein_coding	Phf21b
1740	ENSMUSG00000016626	0	NA	NA	NA	NA	NA	7	106766197	106797309	protein_coding	Nlrp14
1741	ENSMUSG00000016637	291.601	0.228131	0.122053	-1.86912	0.061606	0.573057	15	78043663	78058307	protein_coding	Ift27
1742	ENSMUSG00000016664	1347.34	0.0843853	0.0994012	-0.848936	0.395917	0.894879	15	83259808	83348807	protein_coding	Pacsin2
1743	ENSMUSG00000016756	4.79019	-0.771463	0.81901	0.941946	0.34622	NA	13	24511387	24661360	protein_coding	Cmah
1744	ENSMUSG00000016757	276.574	-0.0933248	0.111423	0.837573	0.402271	0.895681	15	83459291	83479358	protein_coding	Ttll12
1745	ENSMUSG00000016758	0.953207	17.5343	265.038	-0.0661576	0.947252	NA	15	83411063	83428835	protein_coding	Bik
1746	ENSMUSG00000016763	1480.6	0.0684677	0.0689707	-0.992706	0.320853	0.860415	15	83489200	83609222	protein_coding	Scube1
1747	ENSMUSG00000016831	1362.09	-0.0494349	0.0615445	0.803239	0.421837	0.899932	14	52516603	52533858	protein_coding	Tox4
1748	ENSMUSG00000016833	130.188	-0.254047	0.158374	1.60409	0.108693	0.680566	5	100946493	100952337	protein_coding	Mrps18c
1749	ENSMUSG00000016918	142.951	-0.978339	0.190598	5.13299	2.85e-07	0.000167846	1	12762501	12931416	protein_coding	Sulf1
1750	ENSMUSG00000016921	1678.7	0.0752229	0.0615155	-1.22283	0.221394	0.806786	2	162773448	162779041	protein_coding	Srsf6
1751	ENSMUSG00000016933	2011.35	0.0742528	0.0601007	-1.23547	0.216655	0.804307	2	160573220	160617680	protein_coding	Plcg1
1752	ENSMUSG00000016940	1007.95	-0.132882	0.0666479	1.99379	0.0461753	0.520656	11	115310954	115322100	protein_coding	Kctd2
1753	ENSMUSG00000016942	3.27802	0.195903	0.848574	-0.230861	0.817423	NA	15	78323867	78352834	protein_coding	Tmprss6
1754	ENSMUSG00000016946	293.481	0.22398	0.167073	-1.34062	0.180045	0.768546	17	24266708	24292459	protein_coding	Kctd5
1755	ENSMUSG00000016982	0.676613	-0.0194025	1.50823	0.0128644	0.989736	NA	13	22165364	22172904	protein_coding	Pom121l2
1756	ENSMUSG00000016984	149.428	0.0383898	0.150465	-0.255141	0.798614	0.974199	11	17888756	17903875	protein_coding	Etaa1
1757	ENSMUSG00000016995	104.457	0.236754	0.22078	-1.07235	0.283563	0.843685	2	164231313	164247080	protein_coding	Matn4
1758	ENSMUSG00000016998	0	NA	NA	NA	NA	NA	2	164117872	164120379	protein_coding	Svs4
1759	ENSMUSG00000017000	0	NA	NA	NA	NA	NA	2	164158671	164160373	protein_coding	Svs6
1760	ENSMUSG00000017002	5.28401	0.0114708	0.76955	-0.0149058	0.988107	NA	2	164195990	164231015	protein_coding	Slpi
1761	ENSMUSG00000017003	0	NA	NA	NA	NA	NA	2	164131188	164133420	protein_coding	Svs3a
1762	ENSMUSG00000017004	0	NA	NA	NA	NA	NA	2	164174660	164176316	protein_coding	Svs5
1763	ENSMUSG00000017007	8.9724	-0.773818	0.688422	1.12405	0.260993	0.830633	2	164245061	164257368	protein_coding	Rbpjl
1764	ENSMUSG00000017009	800.474	0.20196	0.123341	-1.63742	0.101543	0.670512	2	164266167	164285807	protein_coding	Sdc4
1765	ENSMUSG00000017049	0	NA	NA	NA	NA	NA	8	22459791	22464057	protein_coding	Ccdc70
1766	ENSMUSG00000017057	92.6483	0.0753185	0.240931	-0.312615	0.754573	0.968137	X	35375763	35434912	protein_coding	Il13ra1
1767	ENSMUSG00000017064	0	NA	NA	NA	NA	NA	13	28326467	28335594	protein_coding	Prl5a1
1768	ENSMUSG00000017119	3245.18	-0.0511618	0.0586459	0.872385	0.382998	0.888106	11	101442975	101472777	protein_coding	Nbr1
1769	ENSMUSG00000017132	1548.62	-0.00950709	0.0667898	0.142343	0.886809	0.985307	11	118022845	118139386	protein_coding	Cyth1
1770	ENSMUSG00000017144	197.653	0.00275847	0.133878	-0.0206044	0.983561	0.997497	2	51020450	51039123	protein_coding	Rnd3
1771	ENSMUSG00000017146	19.4316	-0.220353	0.362675	0.607576	0.543468	0.928418	11	101379590	101442781	protein_coding	Brca1
1772	ENSMUSG00000017165	0	NA	NA	NA	NA	NA	11	100225233	100227822	protein_coding	Gast
1773	ENSMUSG00000017167	6685.8	0.0748352	0.0787635	-0.950126	0.342048	0.86976	11	101061349	101081550	protein_coding	Cntnap1
1774	ENSMUSG00000017176	535.263	-0.0199799	0.0873416	0.228756	0.819059	0.97554	11	100313147	100332634	protein_coding	Nt5c3b
1775	ENSMUSG00000017188	718.915	-0.0772144	0.0758073	1.01856	0.308411	0.855288	11	101168794	101169940	protein_coding	Coa3
1776	ENSMUSG00000017195	0.578352	-0.80176	2.15117	0.372708	0.709366	NA	11	98441923	98449491	protein_coding	Zpbp2
1777	ENSMUSG00000017204	0.567035	-2.16404	1.85147	1.16882	0.242477	NA	11	98555177	98568534	protein_coding	Gsdma
1778	ENSMUSG00000017210	2254.53	-0.127819	0.0753737	1.69581	0.0899224	0.649258	11	98595417	98620261	protein_coding	Med24
1779	ENSMUSG00000017211	0	NA	NA	NA	NA	NA	11	98537585	98548790	protein_coding	Gsdma2
1780	ENSMUSG00000017221	1891.52	-0.0498122	0.0617603	0.806541	0.419931	0.899932	11	98573380	98586805	protein_coding	Psmd3
1781	ENSMUSG00000017264	838.711	0.0119226	0.0744873	-0.160062	0.872832	0.983008	4	148642886	148666858	protein_coding	Exosc10
1782	ENSMUSG00000017286	742.824	0.0305812	0.0815563	-0.374971	0.707682	0.96478	11	76011813	76134551	protein_coding	Glod4
1783	ENSMUSG00000017288	1076.49	-0.000705298	0.0716927	0.0098378	0.992151	0.999189	11	75937052	76070473	protein_coding	Vps53
1784	ENSMUSG00000017291	2701	-0.0382567	0.0679796	0.562767	0.573594	0.937297	11	77419988	77498641	protein_coding	Taok1
1785	ENSMUSG00000017299	203.788	-0.146316	0.141979	1.03054	0.302755	0.854388	2	164587903	164610527	protein_coding	Dnttip1
1786	ENSMUSG00000017300	0	NA	NA	NA	NA	NA	2	164619081	164621887	protein_coding	Tnnc2
1787	ENSMUSG00000017307	165.679	-0.200937	0.14332	1.40202	0.160909	0.752728	2	164634685	164646802	protein_coding	Acot8
1788	ENSMUSG00000017309	3.04094	0.264768	0.889139	-0.297781	0.765871	NA	11	101932335	101946446	protein_coding	Cd300lg
1789	ENSMUSG00000017310	0	NA	NA	NA	NA	NA	2	164540421	164544373	protein_coding	Spint4
1790	ENSMUSG00000017311	0	NA	NA	NA	NA	NA	11	101997502	101998658	protein_coding	Pyy
1791	ENSMUSG00000017314	3287.05	-0.205352	0.0584464	3.5135	0.000442237	0.0443669	11	101947841	101979341	protein_coding	Mpp2
1792	ENSMUSG00000017316	0	NA	NA	NA	NA	NA	11	101990756	101992145	protein_coding	Ppy
1793	ENSMUSG00000017344	1267.32	-0.0491868	0.450675	0.10914	0.913091	0.991014	11	78389917	78393150	protein_coding	Vtn
1794	ENSMUSG00000017376	2746.53	-0.0460719	0.0819299	0.562333	0.573889	0.937297	11	78457994	78588199	protein_coding	Nlk
1795	ENSMUSG00000017386	115.24	-0.025602	0.167137	0.15318	0.878256	0.98422	11	78049325	78056415	protein_coding	Traf4
1796	ENSMUSG00000017390	15663.1	0.223556	0.0826063	-2.70628	0.00680414	0.224562	11	78213794	78218607	protein_coding	Aldoc
1797	ENSMUSG00000017400	3416.55	-0.153037	0.103808	1.47423	0.140419	0.725452	11	97927449	97944288	protein_coding	Stac2
1798	ENSMUSG00000017404	2244.8	0.0475215	0.0699267	-0.67959	0.496764	0.917865	11	97917536	97921318	protein_coding	Rpl19
1799	ENSMUSG00000017405	54.9656	0.348897	0.241593	-1.44415	0.148696	0.737751	11	78056932	78067501	protein_coding	Nek8
1800	ENSMUSG00000017412	5246.03	0.0287875	0.108623	-0.265022	0.790993	0.974199	2	52318337	52566843	protein_coding	Cacnb4
1801	ENSMUSG00000017417	936.868	0.265026	0.250967	-1.05602	0.290959	0.844943	11	97814064	97877270	protein_coding	Plxdc1
1802	ENSMUSG00000017418	455.671	-0.0509793	0.112941	0.45138	0.651716	0.953243	2	15054206	15087267	protein_coding	Arl5b
1803	ENSMUSG00000017421	1908.21	-0.017608	0.0624484	0.28196	0.777974	0.972852	11	80274105	80296559	protein_coding	Zfp207
1804	ENSMUSG00000017428	1161.43	-0.178951	0.0639791	2.79703	0.00515747	0.187764	11	80319441	80364074	protein_coding	Psmd11
1805	ENSMUSG00000017446	60.5264	-0.502901	0.230133	2.18526	0.0288695	0.445585	11	118319029	118340789	protein_coding	C1qtnf1
1806	ENSMUSG00000017453	25.708	0.257998	0.353679	-0.729469	0.465715	0.914301	11	77771441	77784922	protein_coding	Pipox
1807	ENSMUSG00000017466	3711.59	-0.159519	0.0923845	1.72668	0.0842248	0.636964	11	118191887	118246566	protein_coding	Timp2
1808	ENSMUSG00000017478	912.872	-0.042963	0.0693289	0.619697	0.535457	0.927835	8	123103348	123144099	protein_coding	Zc3h18
1809	ENSMUSG00000017485	2077.92	-0.0600981	0.0654411	0.918354	0.358433	0.878888	14	6034301	6104584	protein_coding	Top2b
1810	ENSMUSG00000017491	45.8375	-0.367572	0.320947	1.14527	0.252097	0.8229	14	5650540	6038924	protein_coding	Rarb
1811	ENSMUSG00000017493	1335.22	-0.772564	0.248181	3.11291	0.00185256	0.11126	11	98932070	98945218	protein_coding	Igfbp4
1812	ENSMUSG00000017499	6.47217	-0.407521	0.976344	0.417395	0.67639	NA	11	98798627	98814766	protein_coding	Cdc6
1813	ENSMUSG00000017548	573.895	0.116435	0.088032	-1.32264	0.185954	0.773264	11	79883932	79924949	protein_coding	Suz12
1814	ENSMUSG00000017550	98.6839	0.0578906	0.188632	-0.306897	0.758922	0.968959	11	79980226	80026620	protein_coding	Atad5
1815	ENSMUSG00000017561	198.336	-0.151519	0.133806	1.13238	0.257475	0.829153	11	79937319	79971817	protein_coding	Crlf3
1816	ENSMUSG00000017588	0.844752	-0.767944	1.62841	0.471591	0.637219	NA	11	99236391	99241930	protein_coding	Krt27
1817	ENSMUSG00000017607	11.6858	-0.313272	0.466501	0.671536	0.501879	0.919146	11	98956504	98980132	protein_coding	Tns4
1818	ENSMUSG00000017615	1056.19	-0.0149456	0.0723157	0.206672	0.836266	0.977038	11	78413676	78427158	protein_coding	Tnfaip1
1819	ENSMUSG00000017631	11724.8	0.00686021	0.0613394	-0.11184	0.91095	0.990686	11	76307560	76514384	protein_coding	Abr
1820	ENSMUSG00000017639	8444.71	-0.0605763	0.0581314	1.04206	0.297385	0.848739	11	79482038	79588849	protein_coding	Rab11fip4
1821	ENSMUSG00000017652	9.77106	-0.661919	0.510518	1.29656	0.194782	0.785938	2	164897547	164914868	protein_coding	Cd40
1822	ENSMUSG00000017664	766.375	0.0809899	0.0932328	-0.868684	0.38502	0.888477	2	165118474	165129789	protein_coding	Slc35c2
1823	ENSMUSG00000017667	512.952	0.153588	0.0841518	-1.82513	0.0679808	0.593932	2	165216184	165230179	protein_coding	Zfp334
1824	ENSMUSG00000017670	3460.2	-0.0846963	0.0881426	0.960901	0.336602	0.866634	2	165129951	165168399	protein_coding	Elmo2
1825	ENSMUSG00000017677	1275.98	0.032578	0.0643237	-0.50647	0.612527	0.946045	11	79130198	79145497	protein_coding	Wsb1
1826	ENSMUSG00000017679	1323.76	0.0567553	0.0729143	-0.778384	0.436343	0.904709	2	163444234	163460933	protein_coding	Ttpal
1827	ENSMUSG00000017686	1284.69	-0.0469475	0.0628085	0.747471	0.454779	0.910574	11	80099845	80158733	protein_coding	Rhot1
1828	ENSMUSG00000017688	0.91851	17.4903	265.319	-0.0659219	0.94744	NA	3	3573084	3724860	protein_coding	Hnf4g
1829	ENSMUSG00000017692	162.067	-0.425308	0.170961	2.48775	0.0128555	0.301222	11	80191738	80246781	protein_coding	Rhbdl3
1830	ENSMUSG00000017697	12.9252	-0.658562	0.637575	1.03292	0.301642	0.853691	2	163568504	163592159	protein_coding	Ada
1831	ENSMUSG00000017707	4899.8	0.0407283	0.0687026	-0.592821	0.553301	0.93088	2	163465192	163487051	protein_coding	Serinc3
1832	ENSMUSG00000017713	64.1589	0.0144714	0.221223	-0.0654154	0.947843	0.99545	11	117758778	117764307	protein_coding	Tha1
1833	ENSMUSG00000017715	1152.66	-0.0379813	0.0752284	0.50488	0.613643	0.946678	11	117877118	117914837	protein_coding	Pgs1
1834	ENSMUSG00000017716	13.3665	-0.394896	0.456139	0.865736	0.386635	0.889372	11	117740077	117746569	protein_coding	Birc5
1835	ENSMUSG00000017718	12.5674	0.0829638	0.448635	-0.184925	0.853288	0.980368	11	117716750	117730734	protein_coding	Afmid
1836	ENSMUSG00000017720	6.15538	-0.115764	0.616607	0.187743	0.851078	NA	2	164312221	164315644	protein_coding	Trp53tg5
1837	ENSMUSG00000017721	1250.5	-0.0955622	0.0693036	1.37889	0.167928	0.759101	2	164339440	164350221	protein_coding	Pigt
1838	ENSMUSG00000017723	4.16162	-0.0373369	1.32	0.0282855	0.977434	NA	2	164404333	164410430	protein_coding	Wfdc2
1839	ENSMUSG00000017724	186.657	-0.0436244	0.145378	0.300076	0.764119	0.969675	11	101660568	101676197	protein_coding	Etv4
1840	ENSMUSG00000017733	0	NA	NA	NA	NA	NA	2	164430263	164435514	protein_coding	Eppin
1841	ENSMUSG00000017734	708.715	-0.0401449	0.0794137	0.505516	0.613196	0.946547	2	164328026	164335239	protein_coding	Dbndd2
1842	ENSMUSG00000017737	31.5878	0.682605	0.304526	-2.24153	0.0249917	0.418804	2	164782700	164797770	protein_coding	Mmp9
1843	ENSMUSG00000017740	14086.6	0.0474283	0.0597739	-0.793462	0.427509	0.899949	2	164802722	164841651	protein_coding	Slc12a5
1844	ENSMUSG00000017747	141.355	-0.0160749	0.163907	0.0980734	0.921874	0.99244	11	100656858	100661783	protein_coding	Ghdc
1845	ENSMUSG00000017754	507.763	0.0310076	0.13523	-0.229296	0.818639	0.97554	2	164681438	164699631	protein_coding	Pltp
1846	ENSMUSG00000017756	127.876	-0.26108	0.502021	0.520058	0.603023	0.943851	13	73881213	73964873	protein_coding	Slc12a7
1847	ENSMUSG00000017760	1615.38	-0.0304138	0.0687596	0.442322	0.658256	0.954423	2	164674793	164682952	protein_coding	Ctsa
1848	ENSMUSG00000017764	380.533	0.197322	0.13227	-1.49181	0.135748	0.722516	2	164664606	164668791	protein_coding	Zswim1
1849	ENSMUSG00000017765	309.701	-0.0465346	0.137958	0.337311	0.735883	0.96526	8	106670222	106692729	protein_coding	Slc12a4
1850	ENSMUSG00000017767	1.95467	18.5307	258.87	-0.0715832	0.942934	NA	2	164668309	164670457	protein_coding	Spata25
1851	ENSMUSG00000017774	451.028	0.062169	0.0925055	-0.672057	0.501547	0.918979	11	75541330	75564736	protein_coding	Myo1c
1852	ENSMUSG00000017776	2282.44	-0.0500587	0.0704598	0.710458	0.47742	0.916466	11	75570085	75597734	protein_coding	Crk
1853	ENSMUSG00000017778	1244.4	-0.047336	0.078598	0.602254	0.547005	0.929545	13	86192935	86195023	protein_coding	Cox7c
1854	ENSMUSG00000017781	6836.92	0.00169037	0.0729555	-0.0231699	0.981515	0.997277	11	75478923	75519630	protein_coding	Pitpna
1855	ENSMUSG00000017801	383.146	0.163513	0.104585	-1.56345	0.117947	0.691058	11	100978103	100983033	protein_coding	Mlx
1856	ENSMUSG00000017802	1047.36	0.0409838	0.0766806	-0.534474	0.593013	0.9408	11	100987148	101010719	protein_coding	Retreg3
1857	ENSMUSG00000017817	9.90544	-0.102835	0.621781	0.165388	0.868638	0.982395	2	163178162	163239913	protein_coding	Jph2
1858	ENSMUSG00000017830	26.9751	0.121869	0.318065	-0.383157	0.701603	0.964668	11	100585710	100595097	protein_coding	Dhx58
1859	ENSMUSG00000017831	1311.31	0.0191282	0.0643822	-0.297104	0.766387	0.970007	17	53786262	53814708	protein_coding	Rab5a
1860	ENSMUSG00000017832	2.40425	-0.21419	1.05613	0.202806	0.839287	NA	11	100604676	100605401	protein_coding	Hspb9
1861	ENSMUSG00000017837	150.142	0.115431	0.162858	-0.708782	0.47846	0.916466	11	100510070	100518433	protein_coding	Nkiras2
1862	ENSMUSG00000017843	3416.94	-0.0829073	0.0596512	1.38987	0.164569	0.757206	12	110413554	110549496	protein_coding	Ppp2r5c
1863	ENSMUSG00000017858	522.349	-0.0467592	0.0846052	0.552675	0.580486	0.937297	2	162859274	162888061	protein_coding	Ift52
1864	ENSMUSG00000017861	17.8302	0.240689	0.422848	-0.569209	0.569214	0.93656	2	162896607	162926608	protein_coding	Mybl2
1865	ENSMUSG00000017868	21.3269	0.123714	0.353741	-0.349731	0.72654	0.964829	2	162829250	162856047	protein_coding	Sgk2
1866	ENSMUSG00000017897	47.9977	-0.445906	0.438732	1.01635	0.309463	0.855313	2	165436952	165613647	protein_coding	Eya2
1867	ENSMUSG00000017922	0	NA	NA	NA	NA	NA	13	27380642	27387732	protein_coding	Prl3c1
1868	ENSMUSG00000017929	1087.68	-0.0934663	0.0844964	1.10616	0.268659	0.834524	2	167140364	167191103	protein_coding	B4galt5
1869	ENSMUSG00000017943	988.943	-0.0790654	0.0856434	0.923193	0.355907	0.878241	2	163280396	163297244	protein_coding	Gdap1l1
1870	ENSMUSG00000017950	0	NA	NA	NA	NA	NA	2	163348728	163414830	protein_coding	Hnf4a
1871	ENSMUSG00000017969	140.981	0.00431616	0.182402	-0.0236629	0.981122	0.997277	2	167033725	167082524	protein_coding	Ptgis
1872	ENSMUSG00000017978	2429.19	0.101212	0.132408	-0.76439	0.444635	0.909166	6	23262772	23839420	protein_coding	Cadps2
1873	ENSMUSG00000017999	537.71	-0.15522	0.113592	1.36647	0.17179	0.760191	2	166857113	166876867	protein_coding	Ddx27
1874	ENSMUSG00000018001	732.578	-0.0298929	0.0755012	0.395927	0.692159	0.962578	5	143608202	143696005	protein_coding	Cyth3
1875	ENSMUSG00000018008	206.254	-0.0912426	0.130991	0.696559	0.486079	0.916489	15	78481247	78506219	protein_coding	Cyth4
1876	ENSMUSG00000018012	211.447	0.012777	0.185668	-0.0688166	0.945136	0.995337	11	120612296	120614795	protein_coding	Rac3
1877	ENSMUSG00000018040	1130.21	0.051084	0.0674705	-0.757132	0.448971	0.909441	15	82997634	83007002	protein_coding	Rrp7a
1878	ENSMUSG00000018042	1051.97	0.0327483	0.0734405	-0.445916	0.655658	0.954194	15	83037695	83056793	protein_coding	Cyb5r3
1879	ENSMUSG00000018068	462.626	0.0638979	0.101758	-0.627943	0.530042	0.927822	11	86101507	86148401	protein_coding	Ints2
1880	ENSMUSG00000018076	3093.3	0.0428255	0.0753047	-0.568696	0.569563	0.93656	5	118698744	118903503	protein_coding	Med13l
1881	ENSMUSG00000018102	144.027	0.0444159	0.161612	-0.27483	0.783447	0.972852	13	23868182	23876891	protein_coding	H2bc4
1882	ENSMUSG00000018126	41.364	-0.474633	0.288737	1.64383	0.100212	0.667606	15	79142395	79169737	protein_coding	Baiap2l2
1883	ENSMUSG00000018143	113.728	0.160073	0.184592	-0.867173	0.385847	0.888978	5	139777268	139788408	protein_coding	Mafk
1884	ENSMUSG00000018160	1084.04	-0.0390017	0.0730008	0.534264	0.593159	0.940922	11	98042980	98084119	protein_coding	Med1
1885	ENSMUSG00000018166	142.699	0.0295451	0.19092	-0.154751	0.877018	0.98422	10	128403392	128425521	protein_coding	Erbb3
1886	ENSMUSG00000018167	522.938	-0.0151068	0.0835517	0.180808	0.856519	0.980681	11	98249194	98271938	protein_coding	Stard3
1887	ENSMUSG00000018168	0.614202	-16.1182	193.518	0.0832904	0.933621	NA	11	98355728	98436857	protein_coding	Ikzf3
1888	ENSMUSG00000018169	44.4553	-0.0445531	0.288395	0.154486	0.877226	0.98422	15	78640082	78657675	protein_coding	Mfng
1889	ENSMUSG00000018171	1772.37	0.020998	0.0815458	-0.257499	0.796794	0.974199	11	86474691	86574662	protein_coding	Vmp1
1890	ENSMUSG00000018189	586.039	-0.000867609	0.0875076	0.00991467	0.992089	0.999189	1	143653010	143683204	protein_coding	Uchl5
1891	ENSMUSG00000018196	1089.51	-0.0711181	0.0659187	1.07888	0.280643	0.841976	1	143592076	143625414	protein_coding	Glrx2
1892	ENSMUSG00000018199	1180.62	0.0666758	0.0927019	-0.719249	0.471987	0.915393	1	143626528	143652806	protein_coding	Ro60
1893	ENSMUSG00000018209	767.057	-0.0874382	0.074422	1.1749	0.240036	0.81412	2	163912242	163997444	protein_coding	Stk4
1894	ENSMUSG00000018211	2.24153	3.45607	1.66151	-2.08008	0.0375184	NA	2	164056374	164063580	protein_coding	Wfdc15b
1895	ENSMUSG00000018217	400.419	-0.12322	0.108209	1.13873	0.254817	0.826264	11	63019808	63050373	protein_coding	Pmp22
1896	ENSMUSG00000018238	10.2783	0.186425	0.654924	-0.284651	0.775912	0.972852	11	53321850	53328731	protein_coding	Gdf9
1897	ENSMUSG00000018239	99.2947	0.264075	0.181337	-1.45627	0.145319	0.732347	11	53215506	53224128	protein_coding	Zcchc10
1898	ENSMUSG00000018259	0	NA	NA	NA	NA	NA	13	27529656	27538199	protein_coding	Prl8a2
1899	ENSMUSG00000018263	0	NA	NA	NA	NA	NA	5	119970733	120023284	protein_coding	Tbx5
1900	ENSMUSG00000018286	1216.93	-0.0692404	0.0632209	1.09521	0.273423	0.837553	11	70416193	70418684	protein_coding	Psmb6
1901	ENSMUSG00000018287	675.125	-0.0860492	0.0787379	1.09286	0.274457	0.837914	11	70554597	70560242	protein_coding	Spag7
1902	ENSMUSG00000018293	1124.41	-0.0546781	0.0648751	0.84282	0.399329	0.895681	11	70542676	70545470	protein_coding	Pfn1
1903	ENSMUSG00000018322	1445.97	0.0517535	0.0612378	-0.845122	0.398043	0.895681	2	163895460	163913089	protein_coding	Tomm34
1904	ENSMUSG00000018326	9332.14	-0.0450721	0.0590562	0.763207	0.44534	0.909378	2	163836880	163860508	protein_coding	Ywhab
1905	ENSMUSG00000018334	847.879	-0.178718	0.135192	1.32195	0.186183	0.773264	11	78904266	79037233	protein_coding	Ksr1
1906	ENSMUSG00000018339	85.5287	0.54603	0.283405	-1.92668	0.0540201	0.551348	11	54793279	54801203	protein_coding	Gpx3
1907	ENSMUSG00000018340	2112.57	0.120474	0.062644	-1.92316	0.0544603	0.552691	11	54869934	54924271	protein_coding	Anxa6
1908	ENSMUSG00000018341	17.9469	0.14522	0.387536	-0.374726	0.707864	0.96478	6	67268302	67353172	protein_coding	Il12rb2
1909	ENSMUSG00000018347	313.292	0.141135	0.10554	-1.33726	0.181136	0.769466	11	65698001	65720065	protein_coding	Zkscan6
1910	ENSMUSG00000018362	362.06	0.04129	0.0965465	-0.42767	0.668892	0.956734	11	106879455	106890367	protein_coding	Kpna2
1911	ENSMUSG00000018363	538.709	0.182975	0.0943914	-1.93847	0.0525653	0.543993	11	106710892	106811541	protein_coding	Smurf2
1912	ENSMUSG00000018372	200.317	0.14433	0.133375	-1.08214	0.279191	0.841348	11	106680078	106710756	protein_coding	Cep95
1913	ENSMUSG00000018377	689.628	0.132801	0.0955735	-1.38952	0.164675	0.757206	11	87959105	87975555	protein_coding	Vezf1
1914	ENSMUSG00000018378	542.732	-0.101541	0.101189	1.00348	0.315627	0.858074	11	87988884	88084966	protein_coding	Cuedc1
1915	ENSMUSG00000018379	2415.26	0.0900356	0.0818744	-1.09968	0.271472	0.837161	11	87938199	87944581	protein_coding	Srsf1
1916	ENSMUSG00000018381	18.504	-0.566117	0.373558	1.51547	0.129652	0.711266	11	95720900	95733302	protein_coding	Abi3
1917	ENSMUSG00000018387	129.957	0.118565	0.196238	-0.604192	0.545716	0.929336	11	53348032	53358593	protein_coding	Shroom1
1918	ENSMUSG00000018395	2498.39	-0.0231504	0.0581428	0.398165	0.690509	0.96207	11	53458206	53492794	protein_coding	Kif3a
1919	ENSMUSG00000018398	7011.9	-0.0886513	0.0629032	1.40933	0.158738	0.752191	11	53410084	53440392	protein_coding	Septin8
1920	ENSMUSG00000018401	1709.5	-0.0494271	0.0660573	0.748247	0.454311	0.910221	11	87482988	87507128	protein_coding	Mtmr4
1921	ENSMUSG00000018405	220.277	-0.111344	0.126341	0.881297	0.378157	0.885499	11	84703887	84710341	protein_coding	Mrm1
1922	ENSMUSG00000018411	10583.5	-0.0536505	0.0562247	0.954216	0.339974	0.869737	11	104122216	104222916	protein_coding	Mapt
1923	ENSMUSG00000018412	1892.63	-0.0793276	0.061647	1.2868	0.198162	0.788344	11	104224055	104359687	protein_coding	Kansl1
1924	ENSMUSG00000018415	1429.51	0.0108319	0.0775382	-0.139698	0.888898	0.986031	11	60307971	60341753	protein_coding	Gid4
1925	ENSMUSG00000018417	1100.9	0.4002	0.0770535	-5.19379	2.06e-07	0.000129937	1	51788924	51955230	protein_coding	Myo1b
1926	ENSMUSG00000018425	308.036	0.0608105	0.104298	-0.583043	0.559865	0.933231	11	86659672	86698572	protein_coding	Dhx40
1927	ENSMUSG00000018427	917.491	0.103445	0.0795227	-1.30082	0.193321	0.783771	11	86827251	86884533	protein_coding	Ypel2
1928	ENSMUSG00000018428	902.191	0.0108262	0.0756691	-0.143073	0.886232	0.985307	11	88721618	88755412	protein_coding	Akap1
1929	ENSMUSG00000018433	378.734	0.0118221	0.0944697	-0.125141	0.900412	0.989825	11	107057489	107080207	protein_coding	Nol11
1930	ENSMUSG00000018442	406.652	0.0445761	0.102905	-0.433177	0.664886	0.954949	11	70897990	70910667	protein_coding	Derl2
1931	ENSMUSG00000018446	652.948	0.0326677	0.096947	-0.336965	0.736143	0.96526	11	70868662	70873852	protein_coding	C1qbp
1932	ENSMUSG00000018449	198.73	-0.0659756	0.139183	0.474022	0.635484	0.949948	11	70861039	70868659	protein_coding	Rpain
1933	ENSMUSG00000018451	3057.58	-0.0209189	0.0815617	0.25648	0.797581	0.974199	11	70922767	70924339	protein_coding	6330403K07Rik
1934	ENSMUSG00000018459	476.764	0.0515543	0.611321	-0.0843327	0.932792	0.993096	2	165246948	165315150	protein_coding	Slc13a3
1935	ENSMUSG00000018470	2267.74	0.676117	0.481317	-1.40472	0.160104	0.752728	11	69217084	69223868	protein_coding	Kcnab3
1936	ENSMUSG00000018474	8404.77	-0.191359	0.0620404	3.08443	0.00203946	0.117299	11	69234099	69260232	protein_coding	Chd3
1937	ENSMUSG00000018476	317.566	0.0522393	0.136558	-0.382543	0.702058	0.964668	11	69289334	69304501	protein_coding	Kdm6b
1938	ENSMUSG00000018479	0.573185	-2.18496	1.81957	1.20081	0.229825	NA	11	85061230	85071971	protein_coding	Chct1
1939	ENSMUSG00000018481	2013.99	-0.0239303	0.080111	0.298715	0.765158	0.969703	11	85078088	85125956	protein_coding	Appbp2
1940	ENSMUSG00000018486	5.49011	-2.48976	0.900271	2.76556	0.0056825	NA	11	103618190	103640647	protein_coding	Wnt9b
1941	ENSMUSG00000018500	48.2168	0.132097	0.253347	-0.521407	0.602083	0.943379	11	62139810	62157279	protein_coding	Adora2b
1942	ENSMUSG00000018501	5539.92	0.00305961	0.0707889	-0.0432216	0.965525	0.99584	11	62207252	62349367	protein_coding	Ncor1
1943	ENSMUSG00000018507	423.078	-0.00432085	0.10812	0.0399636	0.968122	0.99584	11	62465312	62491341	protein_coding	Trpv2
1944	ENSMUSG00000018509	252.694	-0.0749316	0.1324	0.565948	0.571429	0.937297	11	62415772	62430087	protein_coding	Cenpv
1945	ENSMUSG00000018537	604.589	0.021529	0.0930038	-0.231485	0.816938	0.97554	11	97579649	97591323	protein_coding	Pcgf2
1946	ENSMUSG00000018541	323.584	-0.20814	0.10137	2.05327	0.0400466	0.499101	11	97636307	97657382	protein_coding	Cwc25
1947	ENSMUSG00000018543	2.61709	1.00709	1.04255	-0.965985	0.334052	NA	11	97662307	97666744	protein_coding	Spmap1
1948	ENSMUSG00000018547	3346.07	-0.104526	0.057122	1.82986	0.0672703	0.591918	11	97605983	97635530	protein_coding	Pip4k2b
1949	ENSMUSG00000018548	8925.85	0.0635647	0.069105	-0.919828	0.357662	0.878452	11	87017903	87111509	protein_coding	Trim37
1950	ENSMUSG00000018554	73.7602	0.489835	0.218429	-2.24253	0.024927	0.418804	11	69826622	69832431	protein_coding	Ybx2
1951	ENSMUSG00000018559	934.788	-0.0730097	0.0795089	0.918258	0.358484	0.878888	11	69871982	69881427	protein_coding	Ctdnep1
1952	ENSMUSG00000018565	925.875	-0.06506	0.079529	0.818067	0.413319	0.898454	11	69859048	69873343	protein_coding	Elp5
1953	ENSMUSG00000018566	20.6937	-0.141497	0.395847	0.357454	0.720752	0.964829	11	69833365	69839014	protein_coding	Slc2a4
1954	ENSMUSG00000018567	1654.28	-0.0718745	0.0770665	0.93263	0.351011	0.875025	11	69881969	69885777	protein_coding	Gabarap
1955	ENSMUSG00000018569	3.44391	-0.651611	0.842923	0.773037	0.4395	NA	11	69855605	69858711	protein_coding	Cldn7
1956	ENSMUSG00000018570	5.43646	-0.176732	0.671331	0.263256	0.792353	NA	11	69788178	69791813	protein_coding	2810408A11Rik
1957	ENSMUSG00000018572	635.142	-0.0902099	0.0783468	1.15142	0.249561	0.821828	11	69886603	69890835	protein_coding	Phf23
1958	ENSMUSG00000018574	318.849	0.134565	0.107664	-1.24986	0.211351	0.799978	11	69901009	69906237	protein_coding	Acadvl
1959	ENSMUSG00000018581	6.57485	-0.731434	0.655173	1.1164	0.264252	NA	12	117841717	118162778	protein_coding	Dnah11
1960	ENSMUSG00000018583	1098.35	-0.0349057	0.0660808	0.528229	0.597341	0.942536	11	55360511	55395664	protein_coding	G3bp1
1961	ENSMUSG00000018585	312.296	0.0376822	0.104539	-0.36046	0.718503	0.964829	11	55337467	55352065	protein_coding	Atox1
1962	ENSMUSG00000018589	80.1644	-0.736275	0.274632	2.68096	0.0073412	0.235252	X	163912013	164110389	protein_coding	Glra2
1963	ENSMUSG00000018593	2622.58	0.0821516	0.119629	-0.686717	0.492261	0.916674	11	55285326	55314009	protein_coding	Sparc
1964	ENSMUSG00000018595	2.89628	0.91323	0.9476	-0.963729	0.335182	NA	X	135658423	135680890	protein_coding	Glra4
1965	ENSMUSG00000018599	246.139	-0.212412	0.123425	1.72098	0.0852542	0.639267	11	60619224	60623777	protein_coding	Mief2
1966	ENSMUSG00000018604	34.0551	-0.461775	0.346754	1.33171	0.182956	0.771728	5	119808734	119822789	protein_coding	Tbx3
1967	ENSMUSG00000018620	0	NA	NA	NA	NA	NA	9	7628232	7674980	protein_coding	Mmp20
1968	ENSMUSG00000018623	0	NA	NA	NA	NA	NA	9	7692091	7699587	protein_coding	Mmp7
1969	ENSMUSG00000018634	671.173	-0.0450688	0.0880425	0.511899	0.608722	0.945174	11	104023681	104066349	protein_coding	Crhr1
1970	ENSMUSG00000018648	1337.24	-0.0580657	0.115086	0.504542	0.613881	0.946678	11	83938867	83960087	protein_coding	Dusp14
1971	ENSMUSG00000018651	580.211	-0.0403593	0.0813114	0.496355	0.619644	0.947712	11	83969746	84020426	protein_coding	Tada2a
1972	ENSMUSG00000018654	63.6525	0.0757989	0.243335	-0.311501	0.75542	0.968346	11	11634980	11722926	protein_coding	Ikzf1
1973	ENSMUSG00000018656	0.405677	0.386972	1.90025	-0.203642	0.838633	NA	6	42561800	42574626	protein_coding	Tcaf3
1974	ENSMUSG00000018659	569.194	-0.0600629	0.087783	0.68422	0.493836	0.91706	11	96828651	96834812	protein_coding	Pnpo
1975	ENSMUSG00000018661	726.145	-0.0528025	0.084357	0.625942	0.531353	0.927835	11	113539995	113557880	protein_coding	Cog1
1976	ENSMUSG00000018666	520.405	-0.0715543	0.0846243	0.845552	0.397803	0.895681	11	96679953	96699466	protein_coding	Cbx1
1977	ENSMUSG00000018669	413.406	-0.102564	0.0929904	1.10295	0.270048	0.835506	11	96798252	96807322	protein_coding	Cdk5rap3
1978	ENSMUSG00000018672	74.3496	0.0167107	0.232175	-0.0719745	0.942622	0.994847	11	96740696	96752029	protein_coding	Copz2
1979	ENSMUSG00000018677	839.878	0.114123	0.0764582	-1.49261	0.135538	0.72193	11	102293811	102298772	protein_coding	Slc25a39
1980	ENSMUSG00000018678	315.083	-0.0789259	0.130795	0.603432	0.546222	0.929424	11	96844167	96873785	protein_coding	Sp2
1981	ENSMUSG00000018697	200.916	-0.0964044	0.166558	0.578805	0.562721	0.934035	11	84313681	84404348	protein_coding	Aatf
1982	ENSMUSG00000018698	3.01203	1.46452	1.17388	-1.24759	0.21218	NA	11	84409110	84416361	protein_coding	Lhx1
1983	ENSMUSG00000018707	16729.3	-0.0567788	0.0782442	0.725661	0.468046	0.915306	12	110567886	110633379	protein_coding	Dync1h1
1984	ENSMUSG00000018727	59.7146	-0.162737	0.26673	0.610117	0.541785	0.927883	11	113588998	113600843	protein_coding	Cpsf4l
1985	ENSMUSG00000018733	162.94	0.195844	0.144815	-1.35238	0.176255	0.764985	11	83185468	83193412	protein_coding	Pex12
1986	ENSMUSG00000018736	1485.14	-0.10402	0.062511	1.66403	0.0961066	0.660294	11	68712260	68762684	protein_coding	Ndel1
1987	ENSMUSG00000018740	135.131	-0.190506	0.163145	1.16771	0.242925	0.816437	11	68858957	68865191	protein_coding	Slc25a35
1988	ENSMUSG00000018750	3516.51	0.0257919	0.0621626	-0.41491	0.678208	0.959536	11	69656738	69674849	protein_coding	Zbtb4
1989	ENSMUSG00000018752	8.39803	-0.253173	0.692928	0.365367	0.714838	0.96478	11	69573403	69586924	protein_coding	Tnfsfm13
1990	ENSMUSG00000018761	544.27	-0.0123714	0.0913919	0.135366	0.892322	0.986769	11	69547523	69553468	protein_coding	Mpdu1
1991	ENSMUSG00000018765	2252.21	-0.0730084	0.0602058	1.21265	0.225265	0.809257	11	69523816	69544123	protein_coding	Fxr2
1992	ENSMUSG00000018770	2243.24	-0.127049	0.0827973	1.53446	0.124917	0.705109	2	73738791	73741670	protein_coding	Atp5mc3
1993	ENSMUSG00000018774	161.067	0.0164342	0.145303	-0.113103	0.909949	0.990686	11	69555039	69556979	protein_coding	Cd68
1994	ENSMUSG00000018776	4.03211	-0.213891	0.811615	0.263538	0.792136	NA	11	69650716	69652794	protein_coding	Slc35g3
1995	ENSMUSG00000018796	978.616	0.0186968	0.067669	-0.276298	0.782319	0.972852	8	46924074	46989088	protein_coding	Acsl1
1996	ENSMUSG00000018800	1190.88	0.132196	0.0914188	-1.44605	0.148165	0.737751	11	110160195	110228542	protein_coding	Abca5
1997	ENSMUSG00000018809	217.652	0.263472	0.15205	-1.7328	0.0831316	0.636571	11	75239259	75296531	protein_coding	Smyd4
1998	ENSMUSG00000018819	72.2	-0.113988	0.262519	0.434211	0.664135	0.954705	7	142014546	142048604	protein_coding	Lsp1
1999	ENSMUSG00000018820	1615.77	-0.0872057	0.0756496	1.15276	0.24901	0.821828	19	42152390	42183029	protein_coding	Zfyve27
[truncated: 49,793 more rows]
