# Supplementary material
Source: Research Square preprint supplement (doi:10.21203/rs.3.rs-8738572/v1)
Supplement: Supplementary file 4 [file 9be7e179be38ea6fba485245.xlsx]

## Sheet: Legends
Abbreviation	Description
log2FC	Log 2 Fold change
SE	Standard Error
DF	Degrees of Freedom
pvalue	Standard p-value
pvalueBH	Adjusted p-value using the Benjamini-Hochberg (BH)
WT	Wild Type Cortex
KI	SIK1 Knock-in Cortex

## Sheet: Sheet Description
Sheet	Description
Cortex Proteomics stats	Statistical analysis of Cortex proteomics (SIK1 KI vs WT)
Sik1_Cortex_protein_GO	Functional analysis of proteomics by GO profiler

## Sheet: Cortex Proteomics stats
	Index	Protein	Label	log2FC	SE	pvalue	gene_name	pvalueBH
1	1	A0A075B5L0;P01647;P01645;P01644;P01643	Cortex KI_vs_WT	NA	NA	NA	NA	NA
2	5	A0A075B5N9;P01668;P01659;P01665;P01672;P01671;P01670;P01669;P01667;P01666;P03977;P01664;P01660;P01657;P01656;P01654;P01673;P01655	Cortex KI_vs_WT	NA	NA	NA	NA	NA
3	9	A0A075B5V1;A0A075B5V0;A0A075B5U4;A0A075B5V2;A0A0A6YVW3;A0A075B5Y4;A0A0A6YXA5;A0A075B5U7	Cortex KI_vs_WT	-0.351338	0.186865	0.0845727	NA	0.489469
4	13	A0A075B5V1;P06330;P01757;P01756;A0A075B5V6	Cortex KI_vs_WT	-0.0188987	0.516307	0.971403	NA	1
5	17	A0A075B5Y1;P01750	Cortex KI_vs_WT	0.909623	0.756569	0.274539	NA	0.750625
6	21	A0A087WQ44	Cortex KI_vs_WT	0.112438	0.130864	0.407066	Srcap	0.833517
7	25	A0A087WRI3	Cortex KI_vs_WT	NA	NA	NA	NA	NA
8	29	A0A087WRT4	Cortex KI_vs_WT	-0.105279	0.0979	0.303296	Fat1	0.769919
9	33	A0A0A6YXW6	Cortex KI_vs_WT	NA	NA	NA	NA	NA
10	37	A0A0A6YXW6;P01878	Cortex KI_vs_WT	NA	NA	NA	NA	NA
11	41	A0A0G2JDV3;Q000W5	Cortex KI_vs_WT	NA	NA	NA	NA	NA
12	45	A0A0J9YTR2	Cortex KI_vs_WT	0.285785	0.0899	0.0079174	NA	0.126242
13	49	A0A0N4SUI7	Cortex KI_vs_WT	NA	NA	NA	NA	NA
14	53	A0A0U1RQ45	Cortex KI_vs_WT	NA	NA	NA	NA	NA
15	57	A0A140LIW3	Cortex KI_vs_WT	0.154458	0.104403	0.164791	Frmpd3	0.631413
16	61	A0A1B0GRG8	Cortex KI_vs_WT	-0.00945814	0.14471	0.948964	NA	1
17	65	A0A1B0GSF9	Cortex KI_vs_WT	NA	NA	NA	NA	NA
18	69	A0A1B0GT27	Cortex KI_vs_WT	NA	NA	NA	NA	NA
19	73	A0A1D5RLD8	Cortex KI_vs_WT	NA	NA	NA	NA	NA
20	77	A0A1D5RLM8	Cortex KI_vs_WT	0.635372	0.316636	0.0915808	NA	0.507273
21	81	A0A1D5RLM8;Q80X60	Cortex KI_vs_WT	-0.599122	0.549783	0.317646	NA	0.780834
22	85	A0A1L1STD6	Cortex KI_vs_WT	-0.275586	0.20239	0.198322	Inafm2	0.673072
23	89	A0A1L1SUL6	Cortex KI_vs_WT	NA	NA	NA	NA	NA
24	93	A0A1W2P6Q9;P60007	Cortex KI_vs_WT	0.137348	0.290566	0.644914	NA	0.94453
25	97	A0A1W2P7J1	Cortex KI_vs_WT	-0.11142	0.0706	0.14045	NA	0.594913
26	101	A0A1W2P872	Cortex KI_vs_WT	-0.0909167	0.053	0.112044	Nova2	0.553429
27	105	A0A1Y7VJN6;P03987	Cortex KI_vs_WT	-0.340102	0.308176	0.291409	NA	0.759965
28	109	A0A1Y7VLQ2	Cortex KI_vs_WT	-0.0183904	0.152815	0.906202	NA	1
29	113	A0A286YCV9	Cortex KI_vs_WT	0.0748535	0.0881	0.412247	Kif13b	0.835752
30	117	A0A286YCX6	Cortex KI_vs_WT	0.0351762	0.0471	0.469747	NA	0.862189
31	121	A0A2I3BR81	Cortex KI_vs_WT	NA	NA	NA	NA	NA
32	125	A0A2I3BRN2	Cortex KI_vs_WT	NA	NA	NA	NA	NA
33	129	A0A2R8VKG2	Cortex KI_vs_WT	0.040105	0.0716	0.585598	NA	0.914137
34	133	A0A338P6I9	Cortex KI_vs_WT	0.397498	0.166141	0.0339777	NA	0.310431
35	137	A0A338P7C9	Cortex KI_vs_WT	0.245848	0.148629	0.124006	NA	0.572388
36	141	A0A494B9V8	Cortex KI_vs_WT	-0.0224078	0.123421	0.858961	NA	1
37	145	A0A494BB10	Cortex KI_vs_WT	-0.123181	0.213792	0.575147	NA	0.909342
38	149	A0A571BF58	Cortex KI_vs_WT	0.13639	0.142849	0.358527	NA	0.807283
39	153	A0A571BF63	Cortex KI_vs_WT	-1.04467	0.12296	2.02e-06	NA	0.000203537
40	157	A0A5F8MPH2	Cortex KI_vs_WT	-0.0670466	0.147178	0.656848	NA	0.949101
41	161	A0A5F8MPH8	Cortex KI_vs_WT	NA	NA	NA	NA	NA
42	165	A0A5F8MPI9	Cortex KI_vs_WT	0.0835906	0.0533	0.143026	NA	0.598542
43	169	A0A5F8MPP0	Cortex KI_vs_WT	0.337513	0.270444	0.235835	NA	0.713577
44	173	A0A5F8MQ13	Cortex KI_vs_WT	0.0257162	0.164593	0.878441	NA	1
45	177	A0A7N9VR94	Cortex KI_vs_WT	0.407765	0.283152	0.175417	NA	0.645373
46	181	A0A991ENW0	Cortex KI_vs_WT	0.0490733	0.143689	0.738614	NA	0.989713
47	185	A0JLY1	Cortex KI_vs_WT	NA	NA	NA	Cfap210	NA
48	189	A1A5B6	Cortex KI_vs_WT	-0.0750008	0.0841	0.390283	Tbc1d25	0.824085
49	193	A1L3P4	Cortex KI_vs_WT	0.0794169	0.0803	0.342265	Slc9a6	0.796113
50	197	A2A432	Cortex KI_vs_WT	0.130444	0.111256	0.263762	Cul4b	0.740987
51	201	A2A472	Cortex KI_vs_WT	0.126959	0.177141	0.487268	NA	0.869399
52	205	A2A484	Cortex KI_vs_WT	0.225561	0.0771	0.01271	Zmynd8	0.171569
53	209	A2A4P0	Cortex KI_vs_WT	0.35821	0.17219	0.0595895	Dhx8	0.412924
54	213	A2A4U6	Cortex KI_vs_WT	NA	NA	NA	Zfp334	NA
55	217	A2A5R2	Cortex KI_vs_WT	0.143297	0.0879	0.129012	Arfgef2	0.579932
56	221	A2A5Z6	Cortex KI_vs_WT	-0.472759	0.247009	0.079776	Smurf2	0.476794
57	225	A2A654	Cortex KI_vs_WT	0.0179946	0.0959	0.854361	NA	1
58	229	A2A690	Cortex KI_vs_WT	0.0425479	0.0373	0.276841	Tanc2	0.751914
59	233	A2A699	Cortex KI_vs_WT	0.0444869	0.0816	0.595738	Fam171a2	0.918582
60	237	A2A6A1	Cortex KI_vs_WT	0.139143	0.153495	0.382516	Gpatch8	0.820376
61	241	A2A6Q5	Cortex KI_vs_WT	-0.131206	0.106105	0.239904	Cdc27	0.718523
62	245	A2A6T1	Cortex KI_vs_WT	0.0472667	0.0671	0.494835	Cdr2l	0.873138
63	249	A2A716	Cortex KI_vs_WT	-0.23546	0.146535	0.134063	Osbpl7	0.587464
64	253	A2A791	Cortex KI_vs_WT	0.0630076	0.0516	0.245875	Zmym4	0.723243
65	257	A2A7S8	Cortex KI_vs_WT	0.233491	0.161332	0.173435	C77080	0.642442
66	261	A2A870	Cortex KI_vs_WT	NA	NA	NA	Fbf1	NA
67	265	A2A891	Cortex KI_vs_WT	0.327334	0.0869	0.00269795	Camta1	0.0605056
68	269	A2A8L1	Cortex KI_vs_WT	0.271302	0.131885	0.0620874	NA	0.421757
69	273	A2A8L5	Cortex KI_vs_WT	-0.224156	0.0572	0.00204235	Ptprf	0.0487608
70	277	A2A8R0	Cortex KI_vs_WT	0.0687295	0.130557	0.60818	Zfyve9	0.924477
71	281	A2A8U2	Cortex KI_vs_WT	0.087577	0.114883	0.460593	Tmem201	0.857306
72	285	A2A8Z1	Cortex KI_vs_WT	-0.0307763	0.0721	0.677144	Osbpl9	0.958804
73	289	A2A9C3	Cortex KI_vs_WT	0.027738	0.0883	0.758919	Szt2	1
74	293	A2A9Q0	Cortex KI_vs_WT	0.388297	0.137425	0.0153025	Fndc10	0.192274
75	297	A2A9T0	Cortex KI_vs_WT	0.141729	0.276813	0.617942	Tbkbp1	0.930175
76	301	A2AAE1	Cortex KI_vs_WT	0.0251962	0.0267	0.364717	Bltp1	0.810724
77	305	A2AAJ9	Cortex KI_vs_WT	0.26628	0.459553	0.573015	NA	0.908359
78	309	A2AAY5	Cortex KI_vs_WT	0.00744708	0.0846	0.931285	Sh3pxd2b	1
79	313	A2AB59	Cortex KI_vs_WT	-0.189834	0.132821	0.178445	Arhgap27	0.649451
80	317	A2ABV5	Cortex KI_vs_WT	0.134188	0.153117	0.398029	Med14	0.828307
81	321	A2AC93	Cortex KI_vs_WT	NA	NA	NA	Dnai2	NA
82	325	A2ACJ2	Cortex KI_vs_WT	NA	NA	NA	Faap100	NA
83	329	A2ACP1	Cortex KI_vs_WT	NA	NA	NA	Ttc39a	NA
84	333	A2ACQ1	Cortex KI_vs_WT	0.115728	0.11162	0.320272	NA	0.782728
85	337	A2ADA5	Cortex KI_vs_WT	-0.124957	0.0946	0.211328	Pusl1	0.68638
86	341	A2ADY9	Cortex KI_vs_WT	-0.00206835	0.0567	0.971491	Ddi2	1
87	345	A2AEN9	Cortex KI_vs_WT	-0.0912949	0.472752	0.8501	Gm5938	1
88	349	A2AEP0	Cortex KI_vs_WT	-0.335724	0.477471	0.508325	Obp1b	0.879076
89	353	A2AEP0;A2BHD2	Cortex KI_vs_WT	-0.306707	0.717249	0.676504	NA	0.958804
90	357	A2AEV7	Cortex KI_vs_WT	-0.0607481	0.176752	0.737025	Ccdc120	0.9892
91	361	A2AEY4	Cortex KI_vs_WT	NA	NA	NA	Map7d3	NA
92	365	A2AF33	Cortex KI_vs_WT	0.341995	0.459542	0.471072	Tmsb15b1	0.862486
93	369	A2AF33;A2AF31	Cortex KI_vs_WT	-0.127953	0.141956	0.38513	NA	0.821388
94	373	A2AF47	Cortex KI_vs_WT	0.11074	0.0824	0.203676	Dock11	0.678104
95	377	A2AF53	Cortex KI_vs_WT	NA	NA	NA	NA	NA
96	381	A2AF53;Q8R3R5	Cortex KI_vs_WT	-0.1592	0.124722	0.225951	NA	0.701644
97	385	A2AFR3	Cortex KI_vs_WT	0.205475	0.0511	0.00168808	Frmpd4	0.04227
98	389	A2AFS3	Cortex KI_vs_WT	-0.135021	0.133638	0.332268	Elapor1	0.789596
99	393	A2AG50	Cortex KI_vs_WT	0.0104131	0.10929	0.925666	Map7d2	1
100	397	A2AGL3	Cortex KI_vs_WT	NA	NA	NA	Ryr3	NA
101	401	A2AGT5	Cortex KI_vs_WT	0.0157373	0.0578	0.78997	Ckap5	1
102	405	A2AH22	Cortex KI_vs_WT	-0.261871	0.2684	0.348484	Ambra1	0.799477
103	409	A2AHC3	Cortex KI_vs_WT	0.0543917	0.0439	0.238616	Camsap1	0.717114
104	413	A2AHG0	Cortex KI_vs_WT	0.217672	0.0823	0.0214089	Lzts3	0.237759
105	417	A2AHL1	Cortex KI_vs_WT	0.0832006	0.088	0.36287	Ano3	0.80964
106	421	A2AI05	Cortex KI_vs_WT	-0.0121528	0.0711	0.86719	Ndor1	1
107	425	A2AIG8	Cortex KI_vs_WT	-0.0974224	0.121022	0.436482	Accs	0.845534
108	429	A2AIL4	Cortex KI_vs_WT	0.113743	0.096	0.258807	Ndufaf6	0.735523
109	433	A2AIP0	Cortex KI_vs_WT	NA	NA	NA	Cimip2b	NA
110	437	A2AIR5	Cortex KI_vs_WT	-0.271571	0.117156	0.0389056	Grin3a	0.33346
111	441	A2AIV2	Cortex KI_vs_WT	-0.0762586	0.107286	0.490793	Virma	0.870717
112	445	A2AJ15	Cortex KI_vs_WT	-0.105059	0.10563	0.339567	Man1b1	0.794772
113	449	A2AJ72	Cortex KI_vs_WT	-0.0556932	0.0923	0.557535	Fubp3	0.900413
114	453	A2AJ88	Cortex KI_vs_WT	-0.11947	0.0607	0.0727367	Pnpla7	0.457844
115	457	A2AJA9	Cortex KI_vs_WT	-0.0217525	0.0668	0.750272	Ajm1	0.99551
116	461	A2AJI0	Cortex KI_vs_WT	-0.0605684	0.0989	0.551603	Map7d1	0.897034
117	465	A2AJL3	Cortex KI_vs_WT	0.126663	0.117909	0.30384	Fggy	0.769984
118	469	A2AJQ3	Cortex KI_vs_WT	0.0255339	0.164921	0.879533	Dpy19l4	1
119	473	A2AJT4	Cortex KI_vs_WT	0.143046	0.0914	0.14365	NA	0.599823
120	477	A2AJW4	Cortex KI_vs_WT	-0.221903	0.224898	0.343276	Ppp1r3d	0.796572
121	481	A2AJW5	Cortex KI_vs_WT	-0.0336173	0.121026	0.785918	Fam217b	1
122	485	A2AKB4	Cortex KI_vs_WT	0.0590992	0.162245	0.722003	Frmpd1	0.981241
123	489	A2AKB9	Cortex KI_vs_WT	0.189929	0.160076	0.280274	Dcaf10	0.754211
124	493	A2AKG8	Cortex KI_vs_WT	0.0908868	0.0783	0.268161	Focad	0.745011
125	497	A2ALI5	Cortex KI_vs_WT	-0.0824644	0.136432	0.556809	Ajap1	0.900332
126	501	A2ALK8	Cortex KI_vs_WT	0.339061	0.0947	0.011662	Ptpn3	0.162386
127	505	A2ALS5	Cortex KI_vs_WT	0.121136	0.0557	0.0504438	Rap1gap	0.379854
128	509	A2ALU4	Cortex KI_vs_WT	0.0473336	0.0368	0.22211	Shroom2	0.697705
129	513	A2ALU4;Q1W617	Cortex KI_vs_WT	0.170151	0.171088	0.3396	NA	0.794772
130	517	A2ALU4;Q9QXN0	Cortex KI_vs_WT	0.44089	0.258676	0.114035	NA	0.557072
131	521	A2ALW2	Cortex KI_vs_WT	-0.270106	0.14028	0.078194	Zkscan16	0.472793
132	525	A2AM29	Cortex KI_vs_WT	NA	NA	NA	Mllt3	NA
133	529	A2AMW3	Cortex KI_vs_WT	NA	NA	NA	Gabre	NA
134	533	A2AN08	Cortex KI_vs_WT	0.0164112	0.0405	0.692502	Ubr4	0.966495
135	537	A2ANU3	Cortex KI_vs_WT	0.372134	0.127208	0.0127122	Syndig1	0.171569
136	541	A2AP18	Cortex KI_vs_WT	-0.253346	0.07	0.00353061	Plch2	0.0735663
137	545	A2APT9	Cortex KI_vs_WT	0.0771028	0.103981	0.472647	Klhdc7a	0.863342
138	549	A2APV2	Cortex KI_vs_WT	-0.0974496	0.0443	0.0481951	Fmnl2	0.371513
139	553	A2APX8	Cortex KI_vs_WT	0.555509	0.144027	0.00228113	Scn1a	0.0533314
140	557	A2APY7	Cortex KI_vs_WT	-0.0848016	0.0576	0.166558	Ndufaf5	0.633558
141	561	A2AQ19	Cortex KI_vs_WT	0.181294	0.0371	0.000376657	Rtf1	0.013671
142	565	A2AQ25	Cortex KI_vs_WT	0.0817159	0.0553	0.165412	Etl4	0.632374
143	569	A2AQW0	Cortex KI_vs_WT	-0.236304	0.302281	0.449519	Map3k15	0.851436
144	573	A2AR02	Cortex KI_vs_WT	0.3909	0.0913	0.00106752	Ppig	0.0298569
145	577	A2AR50	Cortex KI_vs_WT	0.197705	0.108929	0.0945833	Ralgps1	0.514945
146	581	A2ARP1	Cortex KI_vs_WT	-0.00677281	0.0625	0.915488	Ppip5k1	1
147	585	A2ARS0	Cortex KI_vs_WT	-0.498681	0.201339	0.0291274	Ankrd63	0.285462
148	589	A2ASI5	Cortex KI_vs_WT	-0.301996	0.184856	0.128269	Scn3a	0.579229
149	593	A2ASQ1	Cortex KI_vs_WT	0.177262	0.0583	0.0102197	NA	0.148854
150	597	A2ASS6	Cortex KI_vs_WT	-0.0811547	0.231768	0.732292	NA	0.986661
151	601	A2ASZ8	Cortex KI_vs_WT	0.105273	0.102741	0.325743	Slc25a25	0.785524
152	605	A2AT37	Cortex KI_vs_WT	0.0353803	0.0491	0.485392	Upf2	0.869065
153	609	A2ATK9	Cortex KI_vs_WT	-0.0376951	0.0871	0.672889	Fam171a1	0.957304
154	613	A2ATU0	Cortex KI_vs_WT	0.1882	0.186215	0.332127	Dhtkd1	0.789582
155	617	A2AU34	Cortex KI_vs_WT	NA	NA	NA	Tmem74b	NA
156	621	A2AU72	Cortex KI_vs_WT	NA	NA	NA	Armc3	NA
157	625	A2AUP1	Cortex KI_vs_WT	NA	NA	NA	Pfkfb3	NA
158	629	A2AV25	Cortex KI_vs_WT	-0.021982	0.0482	0.656405	Fibcd1	0.948732
159	633	A2AWA9	Cortex KI_vs_WT	0.0100249	0.0416	0.813651	Rabgap1	1
160	637	A2AWP8	Cortex KI_vs_WT	0.115306	0.183191	0.540866	Arhgef10l	0.892903
161	641	A2AWR3	Cortex KI_vs_WT	-0.102208	0.245718	0.69191	Gpr155	0.966008
162	645	A2BDX3	Cortex KI_vs_WT	0.0602294	0.0547	0.292158	Mocs3	0.760619
163	649	A2BE28	Cortex KI_vs_WT	0.039949	0.112758	0.72927	Las1l	0.985316
164	653	A2BG91;A2ART4;A2ART0	Cortex KI_vs_WT	0.50513	0.26235	0.102495	NA	0.531981
165	657	A2BH40	Cortex KI_vs_WT	-0.0126592	0.0446	0.781285	Arid1a	1
166	661	A2CG49	Cortex KI_vs_WT	0.0684536	0.0491	0.188863	Kalrn	0.662488
167	665	A2CG63	Cortex KI_vs_WT	NA	NA	NA	Arid4b	NA
168	669	A2RS43	Cortex KI_vs_WT	0.101734	0.0618	0.125645	Pcdh7	0.575322
169	673	A2RSJ4	Cortex KI_vs_WT	-0.0430373	0.0792	0.596772	Bltp3b	0.919034
170	677	A2RSQ0	Cortex KI_vs_WT	0.0768429	0.0729	0.312449	Dennd5b	0.777062
171	681	A2RSX7	Cortex KI_vs_WT	0.0783152	0.0637	0.242178	Tyw5	0.720086
172	685	A2RSY6	Cortex KI_vs_WT	0.174752	0.0832	0.0574662	Trmt1l	0.404617
173	689	A2RT62	Cortex KI_vs_WT	-0.0404102	0.0527	0.457634	Fbxl16	0.856016
174	693	A2RT67	Cortex KI_vs_WT	NA	NA	NA	Dennd3	NA
175	697	A2RTH5	Cortex KI_vs_WT	0.151422	0.135728	0.286424	Lcmt1	0.758519
176	701	A2RTL5	Cortex KI_vs_WT	0.0944872	0.0804	0.262904	Rsrc2	0.739904
177	705	A2TJV2	Cortex KI_vs_WT	0.182618	0.265136	0.504065	Palm3	0.876792
178	709	A3KFM7	Cortex KI_vs_WT	NA	NA	NA	Chd6	NA
179	713	A3KFX0	Cortex KI_vs_WT	-0.00992849	0.123897	0.937451	Nt5c1a	1
180	717	A3KFX0;Q91YE9	Cortex KI_vs_WT	-0.057572	0.124841	0.652928	NA	0.947655
181	721	A3KGB4	Cortex KI_vs_WT	0.120709	0.140013	0.405514	Tbc1d8b	0.832404
182	725	A3KGK3	Cortex KI_vs_WT	-0.244506	0.207177	0.260796	NA	0.737899
183	729	A3KGS3	Cortex KI_vs_WT	0.281382	0.0949	0.0118225	Ralgapa2	0.163816
184	733	A3KGV1	Cortex KI_vs_WT	NA	NA	NA	Odf2	NA
185	737	A3KMP2	Cortex KI_vs_WT	0.154816	0.0855	0.0952707	Ttc38	0.516292
186	741	A4FUP9	Cortex KI_vs_WT	0.0159943	0.143341	0.913	Glt1d1	1
187	745	A5H0M4	Cortex KI_vs_WT	NA	NA	NA	Poteg	NA
188	749	A6H5Y3	Cortex KI_vs_WT	-0.195806	0.0776	0.0267311	Mtr	0.271244
189	753	A6H5Z3	Cortex KI_vs_WT	0.0269979	0.0411	0.524117	Exoc6b	0.885802
190	757	A6H603	Cortex KI_vs_WT	0.119948	0.292791	0.689267	Nwd1	0.964577
191	761	A6H611	Cortex KI_vs_WT	-0.0550847	0.0785	0.496082	Mipep	0.873728
192	765	A6H619	Cortex KI_vs_WT	0.165444	0.176386	0.366759	Phrf1	0.812023
193	769	A6H630	Cortex KI_vs_WT	0.107362	0.075	0.17792	Armt1	0.648724
194	773	A6H639	Cortex KI_vs_WT	NA	NA	NA	Tcte1	NA
195	777	A6H650	Cortex KI_vs_WT	-0.350431	0.114005	0.00964816	Rasgef1a	0.143335
196	781	A6H6A9	Cortex KI_vs_WT	0.159231	0.0652	0.0310963	Rabgap1l	0.296178
197	785	A6H6E2	Cortex KI_vs_WT	NA	NA	NA	Mmrn2	NA
198	789	A6H6J9	Cortex KI_vs_WT	-0.0383901	0.0874	0.668337	NA	0.955413
199	793	A6H6S0	Cortex KI_vs_WT	-0.134243	0.0871	0.148996	Herc3	0.608445
200	797	A6H8H2	Cortex KI_vs_WT	0.00356085	0.0827	0.966353	Dennd4c	1
201	801	A6H8H5	Cortex KI_vs_WT	0.151271	0.156975	0.354236	Kcnb2	0.804243
202	805	A6X919	Cortex KI_vs_WT	0.0475853	0.133924	0.72852	Dpy19l1	0.984984
203	809	A6X919;P0CW70	Cortex KI_vs_WT	NA	NA	NA	NA	NA
204	813	A6X935	Cortex KI_vs_WT	-0.297537	0.169346	0.104383	Itih4	0.536192
205	817	A8C756	Cortex KI_vs_WT	NA	NA	NA	Thada	NA
206	821	A8DUK4	Cortex KI_vs_WT	-0.773165	0.383024	0.0664508	Hbb-bs	0.437568
207	825	A8Y5H7	Cortex KI_vs_WT	0.0604656	0.0545	0.288682	Sec14l1	0.758522
208	829	A9Z1V5	Cortex KI_vs_WT	-0.295263	0.112775	0.0224611	Vwa5b1	0.244596
209	833	B0F2B4	Cortex KI_vs_WT	0.187019	0.167695	0.286586	NA	0.758519
210	837	B0V2N1	Cortex KI_vs_WT	0.00987645	0.0638	0.879531	Ptprs	1
211	841	B1AR13	Cortex KI_vs_WT	0.147901	0.146953	0.334064	Cisd3	0.790399
212	845	B1AR17	Cortex KI_vs_WT	0.0224745	0.0881	0.803029	Chd3	1
213	849	B1AR51	Cortex KI_vs_WT	-0.265477	0.171931	0.148518	Dnah9	0.607364
214	853	B1AR51;Q69Z23	Cortex KI_vs_WT	NA	NA	NA	NA	NA
215	857	B1ART2	Cortex KI_vs_WT	-0.0217256	0.0404	0.600664	Vps13d	0.920977
216	861	B1ARW8	Cortex KI_vs_WT	0.0649788	0.250328	0.799592	1110065P20Rik	1
217	865	B1AS29	Cortex KI_vs_WT	0.111567	0.0813	0.195189	Grik3	0.669487
218	869	B1AUC7	Cortex KI_vs_WT	NA	NA	NA	Arhgap36	NA
219	873	B1AUE5	Cortex KI_vs_WT	-0.0841792	0.0702	0.253897	Pex10	0.730835
220	877	B1AUH1	Cortex KI_vs_WT	-0.0467761	0.110021	0.678247	Ptpru	0.959067
221	881	B1AUN2	Cortex KI_vs_WT	-0.0802017	0.106397	0.465506	Eif2b3	0.860289
222	885	B1AVP0	Cortex KI_vs_WT	-0.591416	0.162773	0.00342944	NA	0.0718759
223	889	B1AVZ0	Cortex KI_vs_WT	-0.0345839	0.047	0.476258	Uprt	0.864767
224	893	B1AWC9	Cortex KI_vs_WT	0.00975685	0.155727	0.951074	NA	1
225	897	B1AWN6	Cortex KI_vs_WT	-0.0417864	0.0825	0.621772	Scn2a	0.932138
226	901	B1AXH1	Cortex KI_vs_WT	-0.258219	0.135172	0.080279	NA	0.477624
227	905	B1AXP6	Cortex KI_vs_WT	0.264102	0.118783	0.046155	Tomm5	0.363522
228	909	B1AXV0	Cortex KI_vs_WT	0.166962	0.0892	0.0858269	Frrs1l	0.493072
229	913	B1AY10	Cortex KI_vs_WT	0.0428274	0.0571	0.467663	Nfx1	0.861176
230	917	B1AY13	Cortex KI_vs_WT	0.00341562	0.0531	0.949801	Usp24	1
231	921	B1AYL1	Cortex KI_vs_WT	-0.544985	0.193697	0.0156446	Scn7a	0.194729
232	925	B1AZA5	Cortex KI_vs_WT	0.0262821	0.111465	0.817573	NA	1
233	929	B1AZI6	Cortex KI_vs_WT	0.0355701	0.0511	0.499773	Thoc2	0.875283
234	933	B1AZP2	Cortex KI_vs_WT	0.0115328	0.0708	0.873231	Dlgap4	1
235	937	B1AZR0	Cortex KI_vs_WT	-0.322328	0.140151	0.0402073	Klhl4	0.338777
236	941	B2B9E1	Cortex KI_vs_WT	0.246182	0.247776	0.340047	Triqk	0.795129
237	945	B2KF50	Cortex KI_vs_WT	-0.0216848	0.104382	0.838912	Bltp3a	1
238	949	B2RQC6	Cortex KI_vs_WT	-0.151633	0.0486	0.00880749	Cad	0.135413
239	953	B2RQC6;Q8C196	Cortex KI_vs_WT	-0.155974	0.0452	0.00479188	NA	0.0912569
240	957	B2RQG2	Cortex KI_vs_WT	0.00333619	0.0736	0.964597	Phf3	1
241	961	B2RR83	Cortex KI_vs_WT	-0.0920668	0.0777	0.258771	Ythdc2	0.735523
242	965	B2RRD7;B2KF05	Cortex KI_vs_WT	NA	NA	NA	NA	NA
243	969	B2RRE7	Cortex KI_vs_WT	-0.0719001	0.0582	0.240119	Otud4	0.718662
244	973	B2RSH2	Cortex KI_vs_WT	0.0323662	0.0878	0.718916	Gnai1	0.979944
245	977	B2RUJ5	Cortex KI_vs_WT	0.0790769	0.0598	0.211021	Apba1	0.686243
246	981	B2RUR8	Cortex KI_vs_WT	0.483783	0.124705	0.00219016	Otud7b	0.0517045
247	985	B2RUS7	Cortex KI_vs_WT	0.13587	0.116206	0.265017	Abcc8	0.741946
248	989	B2RUS7;P70170	Cortex KI_vs_WT	0.325234	0.203712	0.136352	NA	0.589601
249	993	B2RVB9	Cortex KI_vs_WT	0.599214	0.260582	0.0611409	Tmem243	0.418406
250	997	B2RVL6	Cortex KI_vs_WT	-0.0660746	0.147499	0.662158	Zcchc24	0.952389
251	1001	B2RW11	Cortex KI_vs_WT	-0.109533	0.0784	0.187641	Ankrd34a	0.661065
252	1005	B2RWC4	Cortex KI_vs_WT	0.043845	0.11516	0.710057	Lrrc73	0.975319
253	1009	B2RWJ3	Cortex KI_vs_WT	0.105719	0.135777	0.451282	Tmem240	0.852384
254	1013	B2RWS6	Cortex KI_vs_WT	-0.241583	0.16028	0.157611	Ep300	0.619595
255	1017	B2RX14	Cortex KI_vs_WT	-0.0776983	0.197753	0.701279	Tut4	0.970897
256	1021	B2RXA1	Cortex KI_vs_WT	0.0417278	0.113294	0.719053	Plcxd2	0.979944
257	1025	B2RXC1	Cortex KI_vs_WT	0.0216646	0.0801	0.791393	Trappc11	1
258	1029	B2RXC2	Cortex KI_vs_WT	-0.355999	0.109723	0.0070275	Itpkb	0.117485
259	1033	B2RXC6	Cortex KI_vs_WT	-0.102328	0.0622	0.126108	Polr3a	0.576007
260	1037	B2RXE2	Cortex KI_vs_WT	-0.0158211	0.123476	0.900168	Slc9a5	1
261	1041	B2RXQ2	Cortex KI_vs_WT	-0.0799401	0.0532	0.158828	Ppfia1	0.621924
262	1045	B2RXR6	Cortex KI_vs_WT	0.309423	0.112089	0.0172626	Ankrd44	0.20716
263	1049	B2RXS3	Cortex KI_vs_WT	0.00661334	0.0878	0.941215	NA	1
264	1053	B2RXS4	Cortex KI_vs_WT	0.0409102	0.0447	0.377737	Plxnb2	0.818597
265	1057	B2RXT3	Cortex KI_vs_WT	0.131792	0.0741	0.100487	Ogdhl	0.527133
266	1061	B2RXV4	Cortex KI_vs_WT	0.253739	0.234105	0.299719	Flvcr1	0.766484
267	1065	B2RY04	Cortex KI_vs_WT	0.121021	0.139861	0.403844	Dock5	0.831667
268	1069	B2RY50	Cortex KI_vs_WT	NA	NA	NA	NA	NA
269	1073	B2RY56	Cortex KI_vs_WT	0.271549	0.109316	0.0287422	Rbm25	0.283136
270	1077	B5TVM2	Cortex KI_vs_WT	-0.219045	0.0529	0.00137518	Ildr2	0.0359693
271	1081	B7ZMP1	Cortex KI_vs_WT	-0.0649359	0.0729	0.390695	Xpnpep3	0.824338
272	1085	B8JJ69	Cortex KI_vs_WT	0.115661	0.0695	0.121843	2310061I04Rik	0.568659
273	1089	B8JKV0	Cortex KI_vs_WT	-0.0697748	0.169803	0.688376	Amn1	0.964386
274	1093	B8QI36	Cortex KI_vs_WT	0.0401621	0.0455	0.394509	Ppfia4	0.82671
275	1097	B8ZXI1	Cortex KI_vs_WT	0.0189791	0.0993	0.85158	Qtrt2	1
276	1101	B9EHT4	Cortex KI_vs_WT	0.0404522	0.0633	0.534578	Clip3	0.890331
277	1105	B9EJ54	Cortex KI_vs_WT	0.0775616	0.052	0.161307	Nup205	0.626955
278	1109	B9EJ80	Cortex KI_vs_WT	0.0847521	0.0502	0.116836	Pdzd8	0.560425
279	1113	B9EJ86	Cortex KI_vs_WT	0.175735	0.0564	0.00889806	Osbpl8	0.13607
280	1117	B9EJA2	Cortex KI_vs_WT	-0.0783916	0.0601	0.216428	Cttnbp2	0.692559
281	1121	B9EJI9	Cortex KI_vs_WT	0.250042	0.16495	0.155444	Tmem229a	0.617736
282	1125	B9EJR8	Cortex KI_vs_WT	-0.314387	0.16883	0.0872388	Dnaaf5	0.496699
283	1129	B9EKI3	Cortex KI_vs_WT	0.0995699	0.0539	0.0892684	Tmf1	0.502036
284	1133	B9EKR1	Cortex KI_vs_WT	0.0568577	0.105593	0.600105	Ptprz1	0.920631
285	1137	C0HK80;C0HK79	Cortex KI_vs_WT	-0.162822	0.100498	0.131166	NA	0.583049
286	1141	C0HKD9;C0HKD8	Cortex KI_vs_WT	0.112617	0.0901	0.234993	NA	0.712806
287	1145	C0HKG6;C0HKG5	Cortex KI_vs_WT	0.111304	0.110209	0.332458	NA	0.789596
288	1149	D3YTP3	Cortex KI_vs_WT	0.124247	0.0859	0.173577	Mtx3	0.642442
289	1153	D3YUB6	Cortex KI_vs_WT	0.264198	0.0746	0.00406167	NA	0.0817807
290	1157	D3YUE4	Cortex KI_vs_WT	0.195121	0.158064	0.240665	Fam151b	0.719094
291	1161	D3YUJ3	Cortex KI_vs_WT	-0.138808	0.0746	0.0875867	NA	0.497747
292	1165	D3YVE8	Cortex KI_vs_WT	-0.280644	0.0854	0.00652136	Slc35g2	0.112
293	1169	D3YVF0	Cortex KI_vs_WT	-0.135472	0.0691	0.0737397	Akap5	0.461404
294	1173	D3YVL2	Cortex KI_vs_WT	NA	NA	NA	Cfap70	NA
295	1177	D3YVV3	Cortex KI_vs_WT	0.238606	0.148828	0.134864	Ankrd29	0.588917
296	1181	D3YWQ0	Cortex KI_vs_WT	0.0623623	0.0593	0.313873	Dgki	0.778119
297	1185	D3YXJ0	Cortex KI_vs_WT	-0.08761	0.0456	0.0785122	Dgkh	0.47351
298	1189	D3YXJ5	Cortex KI_vs_WT	0.118946	0.150252	0.443938	Lratd2	0.847439
299	1193	D3YXK0	Cortex KI_vs_WT	-0.0841709	0.0492	0.11298	Jakmip2	0.555148
300	1197	D3YXK2	Cortex KI_vs_WT	0.100702	0.0708	0.180439	Safb	0.653034
301	1201	D3YXL0	Cortex KI_vs_WT	NA	NA	NA	NA	NA
302	1205	D3YYY8	Cortex KI_vs_WT	-0.0522565	0.109354	0.641332	Arhgef26	0.942742
303	1209	D3YZG8	Cortex KI_vs_WT	-0.0645935	0.0808	0.439355	Mthfd2l	0.846598
304	1213	D3YZI9	Cortex KI_vs_WT	-0.152261	0.0554	0.017652	Pgbd5	0.209951
305	1217	D3YZP9	Cortex KI_vs_WT	-0.0265592	0.0507	0.610072	Ccdc6	0.925784
306	1221	D3YZU1	Cortex KI_vs_WT	0.0503495	0.0405	0.237414	Shank1	0.715451
307	1225	D3YZZ5	Cortex KI_vs_WT	-0.0641869	0.147743	0.671671	Tmed7	0.957033
308	1229	D3Z0K6	Cortex KI_vs_WT	NA	NA	NA	Rsbn1l	NA
309	1233	D3Z0M9	Cortex KI_vs_WT	0.0724903	0.0663	0.295854	Ddx23	0.76416
310	1237	D3Z286	Cortex KI_vs_WT	0.16738	0.197159	0.412519	Tmppe	0.835752
311	1241	D3Z2H9	Cortex KI_vs_WT	-0.30927	0.191917	0.13305	NA	0.586786
312	1245	D3Z2R5	Cortex KI_vs_WT	-0.16436	0.120256	0.196764	Selenon	0.671418
313	1249	D3Z2X2	Cortex KI_vs_WT	1.04366	0.396012	0.0387775	NA	0.332964
314	1253	D3Z3N4	Cortex KI_vs_WT	-0.106352	0.0784	0.199833	Hnrnph3	0.674286
315	1257	D3Z3Y1	Cortex KI_vs_WT	-0.0480607	0.0983	0.633698	Pigg	0.938637
316	1261	D3Z497;Q9WTZ1	Cortex KI_vs_WT	0.0708621	0.126183	0.584736	NA	0.913506
317	1265	D3Z4S3	Cortex KI_vs_WT	0.18937	0.0978	0.0766539	Ptrhd1	0.468281
318	1269	D3Z649	Cortex KI_vs_WT	0.2913	0.129719	0.0443462	Kcnt2	0.355458
319	1273	D3Z690	Cortex KI_vs_WT	NA	NA	NA	Izumo4	NA
320	1277	D3Z6Q9	Cortex KI_vs_WT	0.0647447	0.131274	0.630771	NA	0.937202
321	1281	D3Z7H4	Cortex KI_vs_WT	0.0938125	0.172961	0.597478	Gsg1l	0.919243
322	1285	D3Z7H8	Cortex KI_vs_WT	NA	NA	NA	Cilp2	NA
323	1289	D3Z7P3	Cortex KI_vs_WT	0.0277922	0.0656	0.679245	Gls	0.959494
324	1293	D3Z7Q2	Cortex KI_vs_WT	0.0366092	0.137019	0.793864	Smim20	1
325	1297	D3Z7X0	Cortex KI_vs_WT	0.522861	0.310405	0.117904	Acad12	0.561438
326	1301	D4AFX7	Cortex KI_vs_WT	-0.0897765	0.0476	0.08382	NA	0.487984
327	1305	E0CX23	Cortex KI_vs_WT	NA	NA	NA	Umad1	NA
328	1309	E0CZ16	Cortex KI_vs_WT	0.0524509	0.0883	0.56366	NA	0.903852
329	1313	E0CZ22	Cortex KI_vs_WT	0.0543886	0.0919	0.564979	Mroh1	0.904495
330	1317	E1U8D0	Cortex KI_vs_WT	-0.161677	0.0708	0.0415183	NA	0.344233
331	1321	E9PUD6	Cortex KI_vs_WT	NA	NA	NA	Zscan18	NA
332	1325	E9PUL5	Cortex KI_vs_WT	0.219717	0.241648	0.381121	Prrt2	0.819895
333	1329	E9PUQ8	Cortex KI_vs_WT	0.0289172	0.10866	0.79466	Dgkd	1
334	1333	E9PUR0	Cortex KI_vs_WT	-0.172983	0.125538	0.193377	Ankhd1	0.667035
335	1337	E9PV24	Cortex KI_vs_WT	0.0797331	0.223688	0.727694	Fga	0.984429
336	1341	E9PV24;CON__P02672	Cortex KI_vs_WT	NA	NA	NA	NA	NA
337	1345	E9PV26	Cortex KI_vs_WT	-0.112759	0.0807	0.187793	Prr36	0.661065
338	1349	E9PV86	Cortex KI_vs_WT	-0.223552	0.0915	0.0310053	NA	0.295705
339	1353	E9PV86;Q5RJH2	Cortex KI_vs_WT	NA	NA	NA	NA	NA
340	1357	E9PVA8	Cortex KI_vs_WT	-0.041817	0.0499	0.418029	Gcn1	0.837915
341	1361	E9PVB5	Cortex KI_vs_WT	0.256605	0.0733	0.00437473	Ttc17	0.0859837
342	1365	E9PVD3	Cortex KI_vs_WT	0.308533	0.229325	0.203369	Dchs1	0.678104
343	1369	E9PVZ8	Cortex KI_vs_WT	0.0455013	0.0439	0.320615	Golgb1	0.782951
344	1373	E9PW37	Cortex KI_vs_WT	0.0840657	0.0391	0.052681	Rasal2	0.388302
345	1377	E9PW83	Cortex KI_vs_WT	0.0241118	0.051	0.644568	Fam184a	0.944323
346	1381	E9PW83;P10284;Q08624	Cortex KI_vs_WT	NA	NA	NA	NA	NA
347	1385	E9PWM3	Cortex KI_vs_WT	-0.15122	0.0681	0.0464449	Armcx4	0.364299
348	1389	E9PWQ3	Cortex KI_vs_WT	-0.355612	0.219652	0.131418	NA	0.583466
349	1393	E9PWR4	Cortex KI_vs_WT	-0.0291892	0.0541	0.599599	NA	0.920263
350	1397	E9PWW6	Cortex KI_vs_WT	NA	NA	NA	Zc3h7a	NA
351	1401	E9PWW9	Cortex KI_vs_WT	0.03066	0.0903	0.74003	Rsf1	0.990315
352	1405	E9PX28	Cortex KI_vs_WT	-0.0972972	0.0441	0.0474792	Pcdh10	0.368827
353	1409	E9PX28;Q8VHR0	Cortex KI_vs_WT	-0.304558	0.13797	0.0475005	NA	0.368853
354	1413	E9PX29	Cortex KI_vs_WT	0.0524986	0.0818	0.533008	Sptbn4	0.889755
355	1417	E9PX29;Q66JV7	Cortex KI_vs_WT	0.100311	0.137589	0.479953	NA	0.866945
356	1421	E9PX68	Cortex KI_vs_WT	-0.0236529	0.200559	0.90807	Slc4a1ap	1
357	1425	E9PXF0	Cortex KI_vs_WT	0.1095	0.0732	0.160395	Pcdh17	0.625464
358	1429	E9PXF8	Cortex KI_vs_WT	-0.0680417	0.0551	0.240565	Sbf2	0.719094
359	1433	E9PY16	Cortex KI_vs_WT	0.096945	0.0696	0.188964	Adap1	0.662569
360	1437	E9PY28	Cortex KI_vs_WT	NA	NA	NA	NA	NA
361	1441	E9PY46	Cortex KI_vs_WT	2.8e-05	0.138721	0.999842	Ift140	1
362	1445	E9PY62	Cortex KI_vs_WT	0.286534	0.235637	0.247365	Cntnap3	0.724894
363	1449	E9PYD1	Cortex KI_vs_WT	-0.00890126	0.097	0.928384	Fam98c	1
364	1453	E9PYF4	Cortex KI_vs_WT	-0.301459	0.093	0.00705192	Lmo7	0.117784
365	1457	E9PYF7	Cortex KI_vs_WT	0.0192569	0.178696	0.915964	Ap1ar	1
366	1461	E9PYG6	Cortex KI_vs_WT	-0.0258143	0.0742	0.733999	Rasa1	0.98796
367	1465	E9PYH6	Cortex KI_vs_WT	0.174024	0.106838	0.129296	Setd1a	0.579932
368	1469	E9PYL2	Cortex KI_vs_WT	-0.0174979	0.115987	0.882592	Prr12	1
369	1473	E9PYP2	Cortex KI_vs_WT	-0.280706	0.150208	0.0862484	Nbeal1	0.494068
370	1477	E9PYQ0	Cortex KI_vs_WT	NA	NA	NA	NA	NA
371	1481	E9PYR1	Cortex KI_vs_WT	0.0635023	0.096	0.520598	NA	0.88512
372	1485	E9PZ11	Cortex KI_vs_WT	NA	NA	NA	Zbtb47	NA
373	1489	E9PZ19	Cortex KI_vs_WT	0.247546	0.0986	0.027438	NA	0.275765
374	1493	E9PZ66	Cortex KI_vs_WT	NA	NA	NA	Or51v14	NA
375	1497	E9PZF7	Cortex KI_vs_WT	0.418598	0.222107	0.0839191	Slc25a53	0.488291
376	1501	E9PZJ8	Cortex KI_vs_WT	-0.0491886	0.0753	0.525845	Ascc3	0.886648
377	1505	E9PZM4	Cortex KI_vs_WT	0.243677	0.0704	0.00468573	Chd2	0.089664
378	1509	E9PZM4;P40201	Cortex KI_vs_WT	0.0797851	0.275732	0.777246	NA	1
379	1513	E9PZM7	Cortex KI_vs_WT	0.286195	0.0844	0.00535055	Scaf11	0.0983448
380	1517	E9PZP8	Cortex KI_vs_WT	0.0597523	0.0741	0.435643	Herc1	0.845061
381	1521	E9Q0B6	Cortex KI_vs_WT	NA	NA	NA	Dnah6	NA
382	1525	E9Q0S6	Cortex KI_vs_WT	0.0381203	0.0655	0.571517	Tns1	0.907694
383	1529	E9Q137	Cortex KI_vs_WT	0.00187423	0.0707	0.97928	Tex264	1
384	1533	E9Q1M1	Cortex KI_vs_WT	0.00675071	0.133401	0.961283	Pdzd2	1
385	1537	E9Q1P8	Cortex KI_vs_WT	-0.000105275	0.079	0.998958	Irf2bp2	1
386	1541	E9Q236	Cortex KI_vs_WT	0.0118719	0.0629	0.853398	Abcc4	1
387	1545	E9Q238	Cortex KI_vs_WT	NA	NA	NA	Kank1	NA
388	1549	E9Q271	Cortex KI_vs_WT	-0.117589	0.0647	0.0939673	NA	0.513454
389	1553	E9Q2E4	Cortex KI_vs_WT	0.0189715	0.0313	0.555956	Hectd4	0.899838
390	1557	E9Q2Y0	Cortex KI_vs_WT	NA	NA	NA	Eid2b	NA
391	1561	E9Q3A7	Cortex KI_vs_WT	0.232092	0.204107	0.277689	Cdh19	0.752053
392	1565	E9Q3C1	Cortex KI_vs_WT	0.0895831	0.183216	0.633692	C2cd2	0.938637
393	1569	E9Q3G8	Cortex KI_vs_WT	0.0288689	0.0627	0.653396	Nup153	0.947655
394	1573	E9Q3L2	Cortex KI_vs_WT	0.116013	0.0463	0.0276556	Pi4ka	0.277097
395	1577	E9Q3M9	Cortex KI_vs_WT	-0.278942	0.13232	0.0567237	Cracdl	0.402363
396	1581	E9Q3P4	Cortex KI_vs_WT	0.214061	0.26892	0.45636	Cenpf	0.855426
397	1585	E9Q401	Cortex KI_vs_WT	0.0906713	0.0432	0.057531	Ryr2	0.404839
398	1589	E9Q411	Cortex KI_vs_WT	-0.00722005	0.0483	0.883773	Nbas	1
399	1593	E9Q4F2	Cortex KI_vs_WT	0.18658	0.177246	0.333031	Klhl18	0.78974
400	1597	E9Q4N7	Cortex KI_vs_WT	-0.00543659	0.0838	0.949343	Arid1b	1
401	1601	E9Q4P1	Cortex KI_vs_WT	0.122151	0.249228	0.632888	Wdfy1	0.938272
402	1605	E9Q4S1	Cortex KI_vs_WT	0.118194	0.0942	0.233691	NA	0.71072
403	1609	E9Q4X2	Cortex KI_vs_WT	NA	NA	NA	Uggt2	NA
404	1613	E9Q4Z2	Cortex KI_vs_WT	NA	NA	NA	Acacb	NA
405	1617	E9Q512	Cortex KI_vs_WT	0.125231	0.0581	0.0520555	Trip11	0.38542
406	1621	E9Q555	Cortex KI_vs_WT	-0.342372	0.183324	0.0864282	NA	0.494557
407	1625	E9Q5C9	Cortex KI_vs_WT	0.169618	0.107389	0.140213	Nolc1	0.59489
408	1629	E9Q5F9	Cortex KI_vs_WT	0.121233	0.132665	0.378801	Setd2	0.818889
409	1633	E9Q5K9	Cortex KI_vs_WT	-0.140806	0.0851	0.123954	Ythdc1	0.57235
410	1637	E9Q5M4	Cortex KI_vs_WT	-0.0437706	0.0725	0.557221	Zfr2	0.900332
411	1641	E9Q612	Cortex KI_vs_WT	-0.324856	0.119071	0.0183255	Ptpro	0.21539
412	1645	E9Q616	Cortex KI_vs_WT	0.0831711	0.165547	0.624478	Ahnak	0.933774
413	1649	E9Q634	Cortex KI_vs_WT	0.142816	0.131518	0.298854	Myo1e	0.766343
414	1653	E9Q634;P70248	Cortex KI_vs_WT	0.0404548	0.107842	0.714109	NA	0.977443
415	1657	E9Q6B2	Cortex KI_vs_WT	0.0728491	0.0837	0.401372	Ccdc85c	0.830528
416	1661	E9Q6C8	Cortex KI_vs_WT	NA	NA	NA	Xkr6	NA
417	1665	E9Q6D6	Cortex KI_vs_WT	0.225596	0.164249	0.194714	Zfp277	0.668689
418	1669	E9Q6H8	Cortex KI_vs_WT	-0.0316773	0.0579	0.594134	Plekha5	0.918215
419	1673	E9Q6J5	Cortex KI_vs_WT	0.267565	0.0882	0.0103845	Bod1l	0.150339
420	1677	E9Q6P5	Cortex KI_vs_WT	0.0186694	0.0495	0.712787	Ttc7b	0.976862
421	1681	E9Q6R7	Cortex KI_vs_WT	0.0384043	0.0492	0.450379	Utrn	0.851914
422	1685	E9Q6Y8	Cortex KI_vs_WT	0.0586814	0.0653	0.386449	Usp31	0.822108
423	1689	E9Q735	Cortex KI_vs_WT	-0.111174	0.0737	0.157539	Ube4a	0.619595
424	1693	E9Q743	Cortex KI_vs_WT	NA	NA	NA	NA	NA
425	1697	E9Q777	Cortex KI_vs_WT	-0.131369	0.103313	0.227618	Akap11	0.703895
426	1701	E9Q784	Cortex KI_vs_WT	0.287485	0.109385	0.0220488	Zc3h13	0.241943
427	1705	E9Q7E2	Cortex KI_vs_WT	0.028597	0.0889	0.753364	Arid2	0.99696
428	1709	E9Q7G0	Cortex KI_vs_WT	0.146121	0.0572	0.0252081	Numa1	0.26217
429	1713	E9Q7L1	Cortex KI_vs_WT	NA	NA	NA	Urb2	NA
430	1717	E9Q7M2	Cortex KI_vs_WT	0.209211	0.152719	0.195801	Tsc22d2	0.669947
431	1721	E9Q7P2	Cortex KI_vs_WT	0.192051	0.131314	0.169289	Cacna1i	0.636895
432	1725	E9Q7P2;O88427	Cortex KI_vs_WT	NA	NA	NA	NA	NA
433	1729	E9Q7T7	Cortex KI_vs_WT	0.0345873	0.0987	0.732033	Chadl	0.986527
434	1733	E9Q7X7	Cortex KI_vs_WT	-0.167969	0.0514	0.00670523	NA	0.114119
435	1737	E9Q842	Cortex KI_vs_WT	-0.120813	0.405014	0.770581	NA	1
436	1741	E9Q8D0	Cortex KI_vs_WT	0.936212	0.180134	0.000222884	Dnajc21	0.00891039
437	1745	E9Q8I7	Cortex KI_vs_WT	-0.0555264	0.0786	0.493162	Nfxl1	0.872239
438	1749	E9Q8I9	Cortex KI_vs_WT	0.073032	0.0537	0.199081	Fry	0.673918
439	1753	E9Q8M1	Cortex KI_vs_WT	NA	NA	NA	Zfp358	NA
440	1757	E9Q8Q6	Cortex KI_vs_WT	0.103913	0.0657	0.139712	Ccdc141	0.594364
441	1761	E9Q8V6	Cortex KI_vs_WT	-0.0583475	0.0906	0.531898	Dennd4a	0.889156
442	1765	E9Q912	Cortex KI_vs_WT	0.116956	0.0584	0.0682344	Rap1gds1	0.443517
443	1769	E9Q9B3	Cortex KI_vs_WT	-0.107275	0.10476	0.326033	Spryd3	0.785584
444	1773	E9Q9B7	Cortex KI_vs_WT	0.071477	0.0674	0.309541	Kidins220	0.77476
445	1777	E9Q9D5	Cortex KI_vs_WT	0.0555751	0.138033	0.694307	Rabl2	0.967396
446	1781	E9Q9D8	Cortex KI_vs_WT	NA	NA	NA	Ankrd35	NA
447	1785	E9Q9K8	Cortex KI_vs_WT	-0.0114628	0.0671	0.867294	Akap6	1
448	1789	E9Q9Q2	Cortex KI_vs_WT	-0.135142	0.088	0.15073	R3hdm1	0.611137
449	1793	E9Q9Q6	Cortex KI_vs_WT	0.0442203	0.0857	0.61543	Cdh18	0.928807
450	1797	E9Q9R9	Cortex KI_vs_WT	0.0202048	0.140792	0.888271	Dlg5	1
451	1801	E9Q9T0	Cortex KI_vs_WT	-0.0997612	0.0872	0.27465	Fbrsl1	0.750625
452	1805	E9QA15	Cortex KI_vs_WT	0.134584	0.136311	0.34297	NA	0.796572
453	1809	E9QAA1	Cortex KI_vs_WT	-0.0723534	0.117361	0.549079	Zfp758	0.896531
454	1813	E9QAE3	Cortex KI_vs_WT	0.170552	0.130844	0.216865	Btaf1	0.692868
455	1817	E9QAP7	Cortex KI_vs_WT	NA	NA	NA	Taf4	NA
456	1821	E9QAP7;G5E8Z2	Cortex KI_vs_WT	NA	NA	NA	NA	NA
457	1825	E9QAT4	Cortex KI_vs_WT	-0.0261276	0.031	0.415188	Sec16a	0.835879
458	1829	F2Z3U3	Cortex KI_vs_WT	0.0588526	0.064	0.376251	Raph1	0.817781
459	1833	F6QRE9	Cortex KI_vs_WT	NA	NA	NA	NA	NA
460	1837	F6SEU4	Cortex KI_vs_WT	-0.155526	0.0481	0.00717937	Syngap1	0.119191
461	1841	F6TQW2;P01864	Cortex KI_vs_WT	-0.51011	0.35371	0.174842	NA	0.644117
462	1845	F6TQW2;P01864;P01863;P01865	Cortex KI_vs_WT	-0.235365	0.252388	0.369435	NA	0.813715
463	1849	F6UK53	Cortex KI_vs_WT	NA	NA	NA	Tex16	NA
464	1853	F6UUZ3	Cortex KI_vs_WT	1.15463	0.500538	0.0397078	NA	0.336954
465	1857	F6UZS4	Cortex KI_vs_WT	NA	NA	NA	NA	NA
466	1861	F6V035	Cortex KI_vs_WT	-0.0769932	0.0744	0.321031	Ccdc149	0.78307
467	1865	F6W8I0	Cortex KI_vs_WT	0.283971	0.163821	0.108612	NA	0.545629
468	1869	F6XLV1	Cortex KI_vs_WT	0.0336057	0.166378	0.843313	Crocc2	1
469	1873	F6ZDS4	Cortex KI_vs_WT	0.0635093	0.032	0.0705804	Tpr	0.451338
470	1877	F6ZE64	Cortex KI_vs_WT	0.0255167	0.0708	0.724715	NA	0.982432
471	1881	F7BAB2	Cortex KI_vs_WT	0.00868005	0.0732	0.907517	Tmem132b	1
472	1885	F7BJB9	Cortex KI_vs_WT	NA	NA	NA	Morc3	NA
473	1889	F7BWT7	Cortex KI_vs_WT	0.0529438	0.189212	0.784386	Tspan15	1
474	1893	F8VPK0	Cortex KI_vs_WT	-0.0595726	0.0468	0.227334	Skic3	0.703667
475	1897	F8VPK8	Cortex KI_vs_WT	0.356554	0.0489	9.54e-06	Pcdh9	0.000695355
476	1901	F8VPN4	Cortex KI_vs_WT	0.0453092	0.0642	0.493519	Agl	0.872275
477	1905	F8VPP8	Cortex KI_vs_WT	0.0353883	0.0458	0.454791	Zc3h7b	0.854817
478	1909	F8VPU2	Cortex KI_vs_WT	-0.220509	0.0501	0.000865537	Farp1	0.0256938
479	1913	F8VPZ3	Cortex KI_vs_WT	0.0430508	0.0522	0.425656	Usp32	0.840947
480	1917	F8VQ05	Cortex KI_vs_WT	-0.032798	0.0607	0.599135	Fryl	0.920167
481	1921	F8VQB6	Cortex KI_vs_WT	NA	NA	NA	Myo10	NA
482	1925	F8VQC1	Cortex KI_vs_WT	0.0582323	0.0406	0.177404	Srp72	0.647975
483	1929	F8VQG7	Cortex KI_vs_WT	NA	NA	NA	N4bp2	NA
484	1933	F8VQK3	Cortex KI_vs_WT	-0.00875001	0.066	0.896654	Gucy1a2	1
485	1937	G3UW40	Cortex KI_vs_WT	0.141204	0.130456	0.300349	Mcc	0.767088
486	1941	G3UW55	Cortex KI_vs_WT	-1.00717	0.287389	0.00434516	Lbhd2	0.0857838
487	1945	G3UW60	Cortex KI_vs_WT	0.260944	0.297938	0.398313	Susd5	0.828495
488	1949	G3UYQ4	Cortex KI_vs_WT	NA	NA	NA	NA	NA
489	1953	G3X8Q1	Cortex KI_vs_WT	-0.723724	0.521946	0.21489	Cabin1	0.690186
490	1957	G3X8U3	Cortex KI_vs_WT	-0.0727851	0.0889	0.428906	Qng1	0.842417
491	1961	G3X8X0	Cortex KI_vs_WT	-0.0190495	0.162015	0.908347	Dhx16	1
492	1965	G3X972	Cortex KI_vs_WT	0.0273604	0.0636	0.674911	Sec24c	0.958247
493	1969	G3X9B1	Cortex KI_vs_WT	0.0854333	0.0942	0.382414	Heatr1	0.820363
494	1973	G3X9I7	Cortex KI_vs_WT	0.102985	0.27793	0.723708	Zc3h12b	0.981948
495	1977	G3X9J0	Cortex KI_vs_WT	-0.0754267	0.054	0.187672	Sipa1l3	0.661065
496	1981	G3X9K3	Cortex KI_vs_WT	0.0537853	0.0655	0.427242	Arfgef1	0.841669
497	1985	G3X9N3	Cortex KI_vs_WT	-0.210666	0.0865	0.0314504	Pnma8b	0.298126
498	1989	G3X9X1	Cortex KI_vs_WT	0.0882332	0.0762	0.269539	Kbtbd2	0.74643
499	1993	G3X9Z4	Cortex KI_vs_WT	0.0116143	0.264552	0.965705	Pcf11	1
500	1997	G3XA20	Cortex KI_vs_WT	0.211257	0.132871	0.137833	Grip2	0.591771
501	2001	G3XA30	Cortex KI_vs_WT	NA	NA	NA	Nsmce4a	NA
502	2005	G3XA57	Cortex KI_vs_WT	-0.105834	0.0323	0.00665729	Rab11fip2	0.113573
503	2009	G5E829	Cortex KI_vs_WT	0.207887	0.0536	0.0022081	Atp2b1	0.0519911
504	2013	G5E870	Cortex KI_vs_WT	-0.120799	0.0517	0.0374997	Trip12	0.327028
505	2017	G5E895	Cortex KI_vs_WT	-0.022754	0.087	0.79817	Akr1b10	1
506	2021	G5E895;P21300	Cortex KI_vs_WT	-0.0118439	0.0803	0.885259	NA	1
507	2025	G5E897	Cortex KI_vs_WT	-0.0442202	0.128032	0.735785	Poglut3	0.988656
508	2029	G5E8B9	Cortex KI_vs_WT	0.216082	0.129438	0.1209	Zbtb11	0.567135
509	2033	G5E8C2	Cortex KI_vs_WT	NA	NA	NA	Kbtbd7	NA
510	2037	G5E8C2;E9PYD7	Cortex KI_vs_WT	NA	NA	NA	NA	NA
511	2041	G5E8F4	Cortex KI_vs_WT	NA	NA	NA	Fpgt	NA
512	2045	G5E8G3	Cortex KI_vs_WT	0.026647	0.12552	0.835442	Opcml	1
513	2049	G5E8K5	Cortex KI_vs_WT	0.091019	0.0833	0.296125	Ank3	0.764454
514	2053	G5E8P0	Cortex KI_vs_WT	-0.122096	0.079	0.148395	Tubgcp6	0.60709
515	2057	G5E8P1	Cortex KI_vs_WT	0.362087	0.102953	0.00424664	Brd1	0.084415
516	2061	G5E8V9	Cortex KI_vs_WT	0.143084	0.0727	0.0724471	Arfip1	0.456953
517	2065	G5E905	Cortex KI_vs_WT	NA	NA	NA	Zfp871	NA
518	2069	H3BJZ2	Cortex KI_vs_WT	NA	NA	NA	NA	NA
519	2073	H3BKQ3	Cortex KI_vs_WT	0.063345	0.0564	0.283104	Evi5l	0.756153
520	2077	J3QK46	Cortex KI_vs_WT	0.0341054	0.227243	0.883192	Tmem200c	1
521	2081	J3QMC5	Cortex KI_vs_WT	0.241547	0.0945	0.0252294	Mdn1	0.262315
522	2085	L7N264	Cortex KI_vs_WT	NA	NA	NA	NA	NA
523	2089	L7N264;Q9EP96;Q99J94	Cortex KI_vs_WT	0.00218486	0.251667	0.993229	NA	1
524	2093	L7N466	Cortex KI_vs_WT	0.138843	0.195084	0.503362	Mthfsl	0.876372
525	2097	M0QWN7	Cortex KI_vs_WT	0.0945227	0.174336	0.597614	Usp35	0.919243
526	2101	O08528	Cortex KI_vs_WT	0.0266752	0.0983	0.790684	Hk2	1
527	2105	O08529	Cortex KI_vs_WT	0.102763	0.0404	0.025633	Capn2	0.264836
528	2109	O08530	Cortex KI_vs_WT	0.160795	0.103274	0.145448	S1pr1	0.603116
529	2113	O08532	Cortex KI_vs_WT	-0.184733	0.0668	0.0170803	Cacna2d1	0.205537
530	2117	O08539	Cortex KI_vs_WT	-0.00862262	0.0685	0.901921	Bin1	1
531	2121	O08543	Cortex KI_vs_WT	0.473416	0.208159	0.0632924	Efna5	0.426924
532	2125	O08547	Cortex KI_vs_WT	-0.19513	0.132097	0.165387	Sec22b	0.632347
533	2129	O08553	Cortex KI_vs_WT	-0.0704804	0.0548	0.222619	Dpysl2	0.698496
534	2133	O08573	Cortex KI_vs_WT	0.0782715	0.118931	0.522885	Lgals9	0.885802
535	2137	O08576	Cortex KI_vs_WT	-0.0500975	0.0783	0.534263	Rundc3a	0.890304
536	2141	O08579	Cortex KI_vs_WT	-0.00812013	0.0705	0.910236	Emd	1
537	2145	O08581	Cortex KI_vs_WT	0.153057	0.27966	0.60392	Kcnk1	0.922333
538	2149	O08582	Cortex KI_vs_WT	0.0551743	0.0517	0.306631	Gtpbp1	0.772394
539	2153	O08583	Cortex KI_vs_WT	-0.0944466	0.108185	0.39979	Alyref	0.829651
540	2157	O08585	Cortex KI_vs_WT	-0.107873	0.12909	0.419683	NA	0.838176
541	2161	O08586	Cortex KI_vs_WT	0.161234	0.0562	0.014128	Pten	0.183296
542	2165	O08599	Cortex KI_vs_WT	0.0991036	0.0498	0.0700225	Stxbp1	0.449599
543	2169	O08600	Cortex KI_vs_WT	-0.0276474	0.076	0.722438	Endog	0.981285
544	2173	O08601	Cortex KI_vs_WT	-0.0016056	0.105006	0.988052	Mttp	1
545	2177	O08605	Cortex KI_vs_WT	-0.173342	0.134499	0.221762	Mknk1	0.697578
546	2181	O08638	Cortex KI_vs_WT	0.0437456	0.222764	0.847602	NA	1
547	2185	O08641	Cortex KI_vs_WT	-0.196931	0.226202	0.417441	Sh3yl1	0.83754
548	2189	O08644	Cortex KI_vs_WT	0.120833	0.101787	0.258152	Ephb6	0.735215
549	2193	O08648	Cortex KI_vs_WT	-0.154279	0.0359	0.00103028	Map3k4	0.029124
550	2197	O08663	Cortex KI_vs_WT	0.0878072	0.0682	0.222119	Metap2	0.697705
551	2201	O08672	Cortex KI_vs_WT	0.188996	0.0723	0.022584	NA	0.245562
552	2205	O08677	Cortex KI_vs_WT	0.0384048	0.175154	0.83013	Kng1	1
553	2209	O08677;CON__P01045-1;CON__Q2KJ62;CON__P01044-1	Cortex KI_vs_WT	-0.206996	0.259479	0.440523	NA	0.846761
554	2213	O08688	Cortex KI_vs_WT	-0.0565353	0.0416	0.199214	Capn5	0.673965
555	2217	O08709	Cortex KI_vs_WT	0.0551497	0.0395	0.18755	Prdx6	0.661065
556	2221	O08715	Cortex KI_vs_WT	0.0615502	0.0541	0.27766	Akap1	0.752053
557	2225	O08734	Cortex KI_vs_WT	NA	NA	NA	Bak1	NA
558	2229	O08738	Cortex KI_vs_WT	0.138505	0.107744	0.222871	Casp6	0.69868
559	2233	O08739	Cortex KI_vs_WT	-0.0433618	0.0536	0.434449	Ampd3	0.844572
560	2237	O08739;Q3V1D3	Cortex KI_vs_WT	0.0383011	0.183511	0.838173	NA	1
561	2241	O08740	Cortex KI_vs_WT	0.497616	0.302968	0.12642	NA	0.576256
562	2245	O08747	Cortex KI_vs_WT	-0.145811	0.0689	0.0558971	Unc5c	0.399775
563	2249	O08749	Cortex KI_vs_WT	-0.00446676	0.066	0.947157	Dld	1
564	2253	O08756	Cortex KI_vs_WT	0.043244	0.0456	0.361696	NA	0.809086
565	2257	O08759	Cortex KI_vs_WT	-0.0295211	0.0338	0.399884	Ube3a	0.829707
566	2261	O08784	Cortex KI_vs_WT	0.207235	0.0943	0.0483939	Tcof1	0.372072
567	2265	O08785	Cortex KI_vs_WT	NA	NA	NA	Clock	NA
568	2269	O08785;P97460	Cortex KI_vs_WT	0.142554	0.132705	0.30385	NA	0.769984
569	2273	O08788	Cortex KI_vs_WT	0.015065	0.0283	0.603761	Dctn1	0.922333
570	2277	O08795	Cortex KI_vs_WT	0.0248336	0.106826	0.820092	Prkcsh	1
571	2281	O08796	Cortex KI_vs_WT	-0.311937	0.1265	0.0297161	Eef2k	0.288703
572	2285	O08797	Cortex KI_vs_WT	0.0633876	0.110224	0.575862	Serpinb9	0.90975
573	2289	O08797;Q8VHQ1;Q80UK5;O08806;F6V5V4	Cortex KI_vs_WT	0.0270461	0.0924	0.774817	NA	1
574	2293	O08800	Cortex KI_vs_WT	0.475223	0.16772	0.0298234	Serpinb8	0.288965
575	2297	O08804	Cortex KI_vs_WT	0.241851	0.182658	0.210148	Serpinb6b	0.685144
576	2301	O08804;I7HJI3	Cortex KI_vs_WT	NA	NA	NA	NA	NA
577	2305	O08807	Cortex KI_vs_WT	-0.147687	0.103415	0.178768	Prdx4	0.650034
578	2309	O08808	Cortex KI_vs_WT	-0.0720951	0.0569	0.229088	Diaph1	0.705285
579	2313	O08810	Cortex KI_vs_WT	0.0630835	0.0758	0.421718	Eftud2	0.838851
580	2317	O08811	Cortex KI_vs_WT	0.0559901	0.0871	0.532327	Ercc2	0.889449
581	2321	O08842	Cortex KI_vs_WT	0.44746	0.0832	0.000165574	Gfra2	0.00705388
582	2325	O08848	Cortex KI_vs_WT	-0.0147782	0.0373	0.698555	Ro60	0.969719
583	2329	O08856	Cortex KI_vs_WT	NA	NA	NA	Ell	NA
584	2333	O08908	Cortex KI_vs_WT	0.035795	0.0736	0.635646	Pik3r2	0.939638
585	2337	O08912	Cortex KI_vs_WT	-0.0745382	0.130823	0.579348	Galnt1	0.910554
586	2341	O08914	Cortex KI_vs_WT	0.0412389	0.0969	0.678016	Faah	0.958968
587	2345	O08915	Cortex KI_vs_WT	0.0586872	0.0723	0.432492	Aip	0.843884
588	2349	O08917	Cortex KI_vs_WT	-0.135813	0.0983	0.192341	Flot1	0.665363
589	2353	O08919	Cortex KI_vs_WT	-0.0418694	0.0849	0.630638	Numbl	0.937202
590	2357	O08967	Cortex KI_vs_WT	-0.0319154	0.0738	0.673273	Cyth3	0.957502
591	2361	O08989	Cortex KI_vs_WT	-0.0629725	0.0678	0.371173	Mras	0.814501
592	2365	O08992	Cortex KI_vs_WT	0.130927	0.092	0.179989	Sdcbp	0.652272
593	2369	O08997	Cortex KI_vs_WT	0.0273009	0.0864	0.757424	Atox1	0.999522
594	2373	O09005	Cortex KI_vs_WT	-0.14723	0.191137	0.456029	Degs1	0.855338
595	2377	O09012	Cortex KI_vs_WT	-0.119741	0.0806	0.163269	Pex5	0.629885
596	2381	O09044	Cortex KI_vs_WT	0.0174257	0.154468	0.912045	Snap23	1
597	2385	O09061	Cortex KI_vs_WT	-0.0357697	0.0972	0.719381	Psmb1	0.979944
598	2389	O09106	Cortex KI_vs_WT	0.188485	0.0637	0.0119172	Hdac1	0.164809
599	2393	O09111	Cortex KI_vs_WT	0.163525	0.0854	0.0795147	Ndufb11	0.47657
600	2397	O09113	Cortex KI_vs_WT	0.135523	0.232292	0.570414	Otp	0.907384
601	2401	O09114	Cortex KI_vs_WT	-0.185221	0.162516	0.276647	Ptgds	0.751667
602	2405	O09117	Cortex KI_vs_WT	0.363632	0.216218	0.118429	Sypl1	0.562364
603	2409	O09118	Cortex KI_vs_WT	NA	NA	NA	Ntn1	NA
604	2413	O09126	Cortex KI_vs_WT	-0.159289	0.0622	0.0249863	Sema4d	0.26068
605	2417	O09131	Cortex KI_vs_WT	0.0686055	0.0542	0.229391	Gsto1	0.705529
606	2421	O09131;Q8K2Q2	Cortex KI_vs_WT	0.0612092	0.174101	0.731254	NA	0.986347
607	2425	O09159	Cortex KI_vs_WT	0.0200139	0.0729	0.788252	Man2b1	1
608	2429	O09164	Cortex KI_vs_WT	0.369228	0.148107	0.0282769	Sod3	0.280517
609	2433	O09167	Cortex KI_vs_WT	-0.0292319	0.111216	0.797133	NA	1
610	2437	O09172	Cortex KI_vs_WT	-0.0445929	0.0468	0.3598	Gclm	0.808038
611	2441	O09174	Cortex KI_vs_WT	-0.0576411	0.117442	0.632417	Amacr	0.938018
612	2445	O35066	Cortex KI_vs_WT	-0.0448089	0.062	0.483701	Kif3c	0.868948
613	2449	O35071	Cortex KI_vs_WT	-0.240983	0.148829	0.13137	Kif1c	0.583372
614	2453	O35074	Cortex KI_vs_WT	0.023548	0.223697	0.917903	Ptgis	1
615	2457	O35075	Cortex KI_vs_WT	-0.0731216	0.0995	0.476653	Vps26c	0.864767
616	2461	O35083	Cortex KI_vs_WT	-0.0282058	0.0865	0.750104	Agpat1	0.995428
617	2465	O35098	Cortex KI_vs_WT	-0.0636546	0.0693	0.376481	NA	0.817823
618	2469	O35099	Cortex KI_vs_WT	0.0959279	0.0647	0.164155	Map3k5	0.630725
619	2473	O35114	Cortex KI_vs_WT	-0.0307199	0.116062	0.795743	Scarb2	1
620	2477	O35125	Cortex KI_vs_WT	NA	NA	NA	Lrrc23	NA
621	2481	O35126	Cortex KI_vs_WT	-0.0941983	0.148851	0.538713	Atn1	0.891626
622	2485	O35127	Cortex KI_vs_WT	-0.311699	0.0859	0.00346022	Grcc10	0.0723098
623	2489	O35129	Cortex KI_vs_WT	0.00670293	0.0717	0.927011	Phb2	1
624	2493	O35130	Cortex KI_vs_WT	NA	NA	NA	Emg1	NA
625	2497	O35136	Cortex KI_vs_WT	-0.0171813	0.100643	0.867293	Ncam2	1
626	2501	O35136;Q99MW1	Cortex KI_vs_WT	-0.0632076	0.37949	0.87049	NA	1
627	2505	O35143	Cortex KI_vs_WT	0.255233	0.414633	0.54968	Atp5if1	0.896531
628	2509	O35144	Cortex KI_vs_WT	0.151983	0.0811	0.0856388	Terf2	0.492228
629	2513	O35153	Cortex KI_vs_WT	0.104578	0.135305	0.454534	Bet1l	0.854608
630	2517	O35166	Cortex KI_vs_WT	-0.0541625	0.141838	0.709239	Gosr2	0.975042
631	2521	O35176	Cortex KI_vs_WT	-0.194659	0.655873	0.771698	Scgb1b2	1
632	2525	O35181	Cortex KI_vs_WT	0.0528335	0.194186	0.790188	Nrg3	1
633	2529	O35188	Cortex KI_vs_WT	-0.233583	0.160215	0.170529	Cx3cl1	0.638427
634	2533	O35206	Cortex KI_vs_WT	0.0841597	0.178419	0.645605	Col15a1	0.944878
635	2537	O35215	Cortex KI_vs_WT	0.0396637	0.0776	0.618551	Ddt	0.93046
636	2541	O35218	Cortex KI_vs_WT	0.0662276	0.072	0.375943	Cpsf2	0.817598
637	2545	O35219	Cortex KI_vs_WT	-0.0868967	0.127209	0.507517	Kcnh2	0.878655
638	2549	O35226	Cortex KI_vs_WT	-0.113556	0.0854	0.20845	Psmd4	0.683275
639	2553	O35231	Cortex KI_vs_WT	-0.0687931	0.233284	0.773118	Kifc3	1
640	2557	O35239	Cortex KI_vs_WT	-0.062645	0.062	0.332281	Ptpn9	0.789596
641	2561	O35245	Cortex KI_vs_WT	-0.202325	0.216032	0.367455	Pkd2	0.812594
642	2565	O35250	Cortex KI_vs_WT	-0.0298491	0.0596	0.625769	Exoc7	0.934276
643	2569	O35286	Cortex KI_vs_WT	0.100781	0.0486	0.0602721	Dhx15	0.415646
644	2573	O35295	Cortex KI_vs_WT	-0.0692886	0.106635	0.52808	Purb	0.887143
645	2577	O35304	Cortex KI_vs_WT	0.00639576	0.0818	0.938966	NA	1
646	2581	O35309	Cortex KI_vs_WT	NA	NA	NA	Nmi	NA
647	2585	O35316	Cortex KI_vs_WT	0.130128	0.154344	0.415662	Slc6a6	0.836314
648	2589	O35317	Cortex KI_vs_WT	NA	NA	NA	Pbx3	NA
649	2593	O35326	Cortex KI_vs_WT	0.102882	0.0589	0.106279	Srsf5	0.540634
650	2597	O35343	Cortex KI_vs_WT	-0.00357992	0.0644	0.956613	Kpna4	1
651	2601	O35344	Cortex KI_vs_WT	0.0523435	0.118904	0.667606	Kpna3	0.955016
652	2605	O35345	Cortex KI_vs_WT	-0.0399923	0.0676	0.565268	Kpna6	0.904634
653	2609	O35350	Cortex KI_vs_WT	0.149867	0.0539	0.0166634	Capn1	0.202904
654	2613	O35375	Cortex KI_vs_WT	-0.851862	0.23408	0.00339305	Nrp2	0.0714053
655	2617	O35379	Cortex KI_vs_WT	-0.10177	0.115569	0.395829	Abcc1	0.827149
656	2621	O35381	Cortex KI_vs_WT	0.606726	0.306118	0.0708553	Anp32a	0.451725
657	2625	O35381;Q64G17	Cortex KI_vs_WT	-0.32856	0.32895	0.3376	NA	0.793423
658	2629	O35382	Cortex KI_vs_WT	0.0719619	0.0395	0.093577	Exoc4	0.512942
659	2633	O35386	Cortex KI_vs_WT	0.0993859	0.0792	0.233408	Phyh	0.710315
660	2637	O35387	Cortex KI_vs_WT	0.164492	0.0495	0.00605532	Hax1	0.10702
661	2641	O35393	Cortex KI_vs_WT	0.12403	0.0822	0.157051	Efnb3	0.618758
662	2645	O35405	Cortex KI_vs_WT	-0.0269098	0.0694	0.704832	Pld3	0.972826
663	2649	O35409	Cortex KI_vs_WT	-0.0406916	0.0534	0.460856	Folh1	0.857439
664	2653	O35409;Q9CZR2	Cortex KI_vs_WT	0.195773	0.454753	0.67446	NA	0.95821
665	2657	O35417	Cortex KI_vs_WT	-0.359787	0.143211	0.027293	NA	0.274846
666	2661	O35425	Cortex KI_vs_WT	0.110861	0.135217	0.44363	Bok	0.847439
667	2665	O35427	Cortex KI_vs_WT	NA	NA	NA	Crcp	NA
668	2669	O35435	Cortex KI_vs_WT	0.0762162	0.0738	0.322259	Dhodh	0.783685
669	2673	O35448	Cortex KI_vs_WT	NA	NA	NA	Ppt2	NA
670	2677	O35449	Cortex KI_vs_WT	-0.176506	0.119676	0.165996	Prrt1	0.633258
671	2681	O35450	Cortex KI_vs_WT	-0.0366979	0.152688	0.814119	Fkbpl	1
672	2685	O35454	Cortex KI_vs_WT	-0.200519	0.0784	0.025044	Clcn6	0.260993
673	2689	O35459	Cortex KI_vs_WT	0.078295	0.0533	0.167611	Ech1	0.63503
674	2693	O35464	Cortex KI_vs_WT	-0.300971	0.153142	0.0729533	Sema6a	0.458724
675	2697	O35465	Cortex KI_vs_WT	-0.0954249	0.0552	0.109728	Fkbp8	0.548357
676	2701	O35474	Cortex KI_vs_WT	0.0664222	0.0572	0.268366	Edil3	0.745359
677	2705	O35488	Cortex KI_vs_WT	-0.216802	0.0585	0.00301404	Slc27a2	0.0656082
678	2709	O35492	Cortex KI_vs_WT	NA	NA	NA	Clk3	NA
679	2713	O35495	Cortex KI_vs_WT	-0.137334	0.0681	0.0667278	Cdk14	0.438092
680	2717	O35516	Cortex KI_vs_WT	0.110437	0.163445	0.512055	Notch2	0.881125
681	2721	O35526	Cortex KI_vs_WT	0.0267615	0.0901	0.771573	Stx1a	1
682	2725	O35551	Cortex KI_vs_WT	-0.000345411	0.0307	0.991207	Rabep1	1
683	2729	O35566	Cortex KI_vs_WT	0.00561668	0.324167	0.986461	Cd151	1
684	2733	O35593	Cortex KI_vs_WT	-0.0432319	0.0423	0.327311	Psmd14	0.786556
685	2737	O35594	Cortex KI_vs_WT	-0.112621	0.0736	0.151924	Ift81	0.612946
686	2741	O35598	Cortex KI_vs_WT	0.0140713	0.101184	0.891705	Adam10	1
687	2745	O35604	Cortex KI_vs_WT	0.204754	0.122407	0.120227	Npc1	0.565723
688	2749	O35607	Cortex KI_vs_WT	-0.129125	0.067	0.0780651	Bmpr2	0.472475
689	2753	O35609	Cortex KI_vs_WT	-0.0927341	0.0562	0.124559	Scamp3	0.573512
690	2757	O35613	Cortex KI_vs_WT	NA	NA	NA	Daxx	NA
691	2761	O35621	Cortex KI_vs_WT	-0.179378	0.0784	0.041151	Pmm1	0.342633
692	2765	O35623	Cortex KI_vs_WT	0.000773261	0.110171	0.994515	Bet1	1
693	2769	O35625	Cortex KI_vs_WT	0.0250927	0.180843	0.891946	Axin1	1
694	2773	O35633	Cortex KI_vs_WT	0.187259	0.0616	0.0102985	Slc32a1	0.149393
695	2777	O35638	Cortex KI_vs_WT	-0.028909	0.0666	0.671866	Stag2	0.957128
696	2781	O35639	Cortex KI_vs_WT	0.0881529	0.0723	0.246059	Anxa3	0.72337
697	2785	O35640	Cortex KI_vs_WT	NA	NA	NA	Anxa8	NA
698	2789	O35643	Cortex KI_vs_WT	0.0588322	0.0553	0.308524	Ap1b1	0.77393
699	2793	O35648	Cortex KI_vs_WT	0.182483	0.225622	0.434372	Cetn3	0.844505
700	2797	O35654	Cortex KI_vs_WT	-0.155069	0.126418	0.243483	Pold2	0.720856
701	2801	O35657	Cortex KI_vs_WT	-0.0704314	0.113116	0.545165	Neu1	0.894873
702	2805	O35658	Cortex KI_vs_WT	0.113597	0.0845	0.20353	NA	0.678104
703	2809	O35660	Cortex KI_vs_WT	NA	NA	NA	Gstm6	NA
704	2813	O35668	Cortex KI_vs_WT	-0.458085	0.154518	0.0118192	Hap1	0.163816
705	2817	O35671	Cortex KI_vs_WT	-0.0941738	0.140249	0.514635	Itgb1bp1	0.882594
706	2821	O35678	Cortex KI_vs_WT	0.131258	0.110567	0.258143	Mgll	0.735215
707	2825	O35680	Cortex KI_vs_WT	0.0125879	0.0833	0.882385	Mrps12	1
708	2829	O35681	Cortex KI_vs_WT	0.0563446	0.0591	0.359572	Syt3	0.807912
709	2833	O35682	Cortex KI_vs_WT	0.0860905	0.192892	0.663316	Myadm	0.953062
710	2837	O35683	Cortex KI_vs_WT	0.162606	0.15846	0.325055	Ndufa1	0.78525
711	2841	O35684	Cortex KI_vs_WT	0.107713	0.0781	0.192975	Serpini1	0.666353
712	2845	O35685	Cortex KI_vs_WT	0.141045	0.103521	0.198069	Nudc	0.673072
713	2849	O35691	Cortex KI_vs_WT	0.290944	0.104548	0.0165618	Pnn	0.20194
714	2853	O35704	Cortex KI_vs_WT	0.066716	0.143282	0.649819	Sptlc1	0.946662
715	2857	O35709	Cortex KI_vs_WT	-0.0209916	0.110909	0.853046	Enc1	1
716	2861	O35710	Cortex KI_vs_WT	-0.000930368	0.0821	0.991143	Noct	1
717	2865	O35711	Cortex KI_vs_WT	NA	NA	NA	Ppfibp2	NA
718	2869	O35730	Cortex KI_vs_WT	0.224955	0.0837	0.01979	Ring1	0.226369
719	2873	O35737	Cortex KI_vs_WT	-0.0349561	0.087	0.694975	Hnrnph1	0.96785
720	2877	O35738	Cortex KI_vs_WT	NA	NA	NA	Klf12	NA
721	2881	O35841	Cortex KI_vs_WT	0.0967736	0.059	0.126988	Api5	0.577138
722	2885	O35855	Cortex KI_vs_WT	0.135647	0.0844	0.133952	Bcat2	0.587441
723	2889	O35857	Cortex KI_vs_WT	0.233359	0.0545	0.00106416	Timm44	0.0298132
724	2893	O35864	Cortex KI_vs_WT	0.0863584	0.056	0.149314	Cops5	0.608869
725	2897	O35874	Cortex KI_vs_WT	-0.0700769	0.170714	0.688678	Slc1a4	0.964386
726	2901	O35887	Cortex KI_vs_WT	0.13297	0.180706	0.475968	Calu	0.864767
727	2905	O35892	Cortex KI_vs_WT	0.142294	0.135451	0.333938	Sp100	0.790298
728	2909	O35892;Q99388	Cortex KI_vs_WT	-0.395541	0.208732	0.0824386	NA	0.483991
729	2913	O35900	Cortex KI_vs_WT	0.626625	0.347193	0.0962367	Lsm2	0.518721
730	2917	O35926	Cortex KI_vs_WT	0.387899	0.142854	0.0187687	Cdk5r2	0.219091
731	2921	O35927	Cortex KI_vs_WT	-0.0199065	0.0542	0.719877	Ctnnd2	0.98032
732	2925	O35943	Cortex KI_vs_WT	-0.00105807	0.107446	0.992305	Fxn	1
733	2929	O35945	Cortex KI_vs_WT	1.32586	0.517551	0.0249193	Aldh1a7	0.260147
734	2933	O35954	Cortex KI_vs_WT	-0.0844999	0.0435	0.0759721	Pitpnm1	0.467093
735	2937	O35955	Cortex KI_vs_WT	0.258472	0.12249	0.0565161	Psmb10	0.401658
736	2941	O35963	Cortex KI_vs_WT	0.0555823	0.0441	0.231821	Rab33b	0.70841
737	2945	O35969	Cortex KI_vs_WT	0.145634	0.127716	0.276409	Gamt	0.751657
738	2949	O35972	Cortex KI_vs_WT	0.0139457	0.180662	0.939743	Mrpl23	1
739	2953	O35988	Cortex KI_vs_WT	0.115214	0.151064	0.460385	Sdc4	0.857177
740	2957	O54692	Cortex KI_vs_WT	0.0491877	0.0731	0.513673	Zw10	0.882271
741	2961	O54724	Cortex KI_vs_WT	-0.0673515	0.10942	0.549701	Cavin1	0.896531
742	2965	O54734	Cortex KI_vs_WT	-0.115527	0.07	0.12462	Ddost	0.573512
743	2969	O54754	Cortex KI_vs_WT	0.218903	0.169302	0.220359	Aox1	0.696759
744	2973	O54774	Cortex KI_vs_WT	0.0998253	0.0737	0.200595	Ap3d1	0.675152
745	2977	O54781	Cortex KI_vs_WT	0.055009	0.0745	0.47472	Srpk2	0.864611
746	2981	O54782	Cortex KI_vs_WT	-0.163133	0.0956	0.113681	Man2b2	0.556682
747	2985	O54784	Cortex KI_vs_WT	0.260892	0.149749	0.107019	Dapk3	0.542551
748	2989	O54784;Q8VDF3	Cortex KI_vs_WT	NA	NA	NA	NA	NA
749	2993	O54785	Cortex KI_vs_WT	-0.150775	0.0764	0.0719257	Limk2	0.45466
750	2997	O54786	Cortex KI_vs_WT	-0.00436915	0.0669	0.949026	Dffa	1
751	3001	O54790	Cortex KI_vs_WT	NA	NA	NA	Mafg	NA
752	3005	O54790;Q61827;O54791	Cortex KI_vs_WT	0.153827	0.141171	0.297267	NA	0.765528
753	3009	O54798	Cortex KI_vs_WT	-0.36507	0.146818	0.0286128	Brs3	0.282271
754	3013	O54799	Cortex KI_vs_WT	NA	NA	NA	Nmbr	NA
755	3017	O54804	Cortex KI_vs_WT	0.0089185	0.103156	0.932529	Chka	1
756	3021	O54818	Cortex KI_vs_WT	-0.109914	0.115332	0.359381	Tpd52l1	0.807593
757	3025	O54824	Cortex KI_vs_WT	-0.102813	0.177715	0.573607	Il16	0.908687
758	3029	O54825	Cortex KI_vs_WT	0.193223	0.14639	0.211487	Bysl	0.686392
759	3033	O54829	Cortex KI_vs_WT	-0.0605173	0.0732	0.424469	Rgs7	0.840015
760	3037	O54833	Cortex KI_vs_WT	-0.0756866	0.0567	0.206369	Csnk2a2	0.681335
761	3041	O54834	Cortex KI_vs_WT	-0.780595	0.202407	0.00228287	Arhgap6	0.0533314
762	3045	O54836	Cortex KI_vs_WT	-0.620426	0.424176	0.169252	NA	0.636895
763	3049	O54865	Cortex KI_vs_WT	-0.0480842	0.0622	0.454281	Gucy1b1	0.854432
764	3053	O54879	Cortex KI_vs_WT	0.1833	0.141778	0.220394	Hmgb3	0.696759
765	3057	O54890	Cortex KI_vs_WT	0.0622654	0.144691	0.68198	Itgb3	0.961049
766	3061	O54901	Cortex KI_vs_WT	-0.103412	0.0753	0.194663	NA	0.668689
767	3065	O54916	Cortex KI_vs_WT	0.274873	0.180605	0.153927	Reps1	0.61605
768	3069	O54929	Cortex KI_vs_WT	0.0675444	0.477177	0.892069	Wsb2	1
769	3073	O54931	Cortex KI_vs_WT	0.0341759	0.117899	0.776861	Pakap	1
770	3077	O54941	Cortex KI_vs_WT	0.028771	0.0691	0.684676	Smarce1	0.962314
771	3081	O54942	Cortex KI_vs_WT	0.216879	0.269721	0.436987	Cldn5	0.846133
772	3085	O54946	Cortex KI_vs_WT	0.064233	0.123237	0.611701	Dnajb6	0.927118
773	3089	O54946;Q9QYI8	Cortex KI_vs_WT	-1.25657	0.503893	0.0282387	NA	0.28051
774	3093	O54949	Cortex KI_vs_WT	-0.0357152	0.191955	0.855506	Nlk	1
775	3097	O54950	Cortex KI_vs_WT	0.119675	0.0815	0.167575	Prkag1	0.635026
776	3101	O54950;Q8BGM7	Cortex KI_vs_WT	0.0546249	0.134817	0.692478	NA	0.966495
777	3105	O54951	Cortex KI_vs_WT	-0.0741088	0.113588	0.526422	Sema6b	0.886648
778	3109	O54962	Cortex KI_vs_WT	0.249109	0.16017	0.145846	Banf1	0.603861
779	3113	O54965	Cortex KI_vs_WT	0.343549	0.297287	0.27033	Rnf13	0.74738
780	3117	O54967	Cortex KI_vs_WT	0.0898554	0.0867	0.320237	Tnk2	0.782709
781	3121	O54983	Cortex KI_vs_WT	-0.808061	0.263307	0.00973681	Crym	0.144079
782	3125	O54984	Cortex KI_vs_WT	0.0955138	0.0575	0.122739	Get3	0.570933
783	3129	O54988	Cortex KI_vs_WT	0.0859007	0.10317	0.421326	Slk	0.838723
784	3133	O54990	Cortex KI_vs_WT	0.346817	0.160839	0.0520536	Prom1	0.38542
785	3137	O54991	Cortex KI_vs_WT	0.135897	0.0909	0.160718	Cntnap1	0.626143
786	3141	O54992	Cortex KI_vs_WT	0.00141847	0.118484	0.990645	Mapkapk5	1
787	3145	O55003	Cortex KI_vs_WT	0.243646	0.0555	0.000881144	Bnip3	0.0260064
788	3149	O55013	Cortex KI_vs_WT	-0.0124618	0.0683	0.858215	Trappc3	1
789	3153	O55017	Cortex KI_vs_WT	0.0349579	0.0522	0.515907	Cacna1b	0.883143
790	3157	O55022	Cortex KI_vs_WT	-0.344488	0.108825	0.00813696	Pgrmc1	0.128534
791	3161	O55023	Cortex KI_vs_WT	0.156716	0.0389	0.00168857	NA	0.04227
792	3165	O55026	Cortex KI_vs_WT	-0.0837148	0.0854	0.346537	Entpd2	0.79822
793	3169	O55028	Cortex KI_vs_WT	-0.0700431	0.093	0.465776	Bckdk	0.860496
794	3173	O55029	Cortex KI_vs_WT	-0.00819846	0.0524	0.878302	Copb2	1
795	3177	O55033	Cortex KI_vs_WT	0.143159	0.0593	0.0325746	Nck2	0.30333
796	3181	O55042	Cortex KI_vs_WT	-0.0987197	0.462508	0.834564	Snca	1
797	3185	O55047	Cortex KI_vs_WT	0.120708	0.0604	0.0688344	Tlk2	0.445308
798	3189	O55057	Cortex KI_vs_WT	-0.233393	0.114051	0.0632739	Pde6d	0.426924
799	3193	O55060	Cortex KI_vs_WT	0.0432409	0.0851	0.620502	Tpmt	0.931376
800	3197	O55091	Cortex KI_vs_WT	-0.072814	0.144123	0.622554	Impact	0.932492
801	3201	O55098	Cortex KI_vs_WT	-0.304579	0.0934	0.0068223	Stk10	0.115509
802	3205	O55100	Cortex KI_vs_WT	0.104535	0.0667	0.143133	Syngr1	0.598885
803	3209	O55102	Cortex KI_vs_WT	-0.276888	0.0577	0.000435914	Bloc1s1	0.0151913
804	3213	O55106	Cortex KI_vs_WT	-0.143818	0.056	0.0246004	Strn	0.257944
805	3217	O55125	Cortex KI_vs_WT	0.0117551	0.0567	0.839257	Nipsnap1	1
806	3221	O55126	Cortex KI_vs_WT	0.0365697	0.075	0.634647	NA	0.93905
807	3225	O55128	Cortex KI_vs_WT	0.0258279	0.120059	0.833282	Sap18	1
808	3229	O55131	Cortex KI_vs_WT	-0.0171277	0.0567	0.767866	Septin7	1
809	3233	O55135	Cortex KI_vs_WT	0.0182141	0.0604	0.768303	Eif6	1
810	3237	O55137	Cortex KI_vs_WT	0.201234	0.295907	0.509375	Acot1	0.879891
811	3241	O55142	Cortex KI_vs_WT	-0.021867	0.178195	0.904365	Rpl35a	1
812	3245	O55143	Cortex KI_vs_WT	0.23437	0.0462	0.000274972	Atp2a2	0.0105347
813	3249	O55143;Q8R429	Cortex KI_vs_WT	0.320859	0.0784	0.0014946	NA	0.0385308
814	3253	O55176	Cortex KI_vs_WT	-0.0309005	0.122167	0.804598	Pja1	1
815	3257	O55186	Cortex KI_vs_WT	-0.0292218	0.207995	0.890601	Cd59a	1
816	3261	O55192	Cortex KI_vs_WT	0.0832823	0.124996	0.517837	Slc6a2	0.884141
817	3265	O55201	Cortex KI_vs_WT	0.0805572	0.0531	0.155155	Supt5	0.617705
818	3269	O55222	Cortex KI_vs_WT	-0.0694679	0.0584	0.257285	Ilk	0.734631
819	3273	O55229	Cortex KI_vs_WT	0.120688	0.0397	0.0102162	Chkb	0.148854
820	3277	O55234	Cortex KI_vs_WT	-0.0955688	0.047	0.0645713	Psmb5	0.430048
821	3281	O55236	Cortex KI_vs_WT	0.126594	0.0974	0.218161	Rngtt	0.694164
822	3285	O55242	Cortex KI_vs_WT	0.0811666	0.175403	0.651828	Sigmar1	0.947342
823	3289	O70133	Cortex KI_vs_WT	0.122669	0.0343	0.00381203	Dhx9	0.0779358
824	3293	O70139	Cortex KI_vs_WT	-0.61214	0.215632	0.0149292	Pkig	0.190047
825	3297	O70146	Cortex KI_vs_WT	-0.0157042	0.133672	0.908421	Tesk1	1
826	3301	O70152	Cortex KI_vs_WT	0.0893785	0.0604	0.164733	Dpm1	0.631413
827	3305	O70161	Cortex KI_vs_WT	-0.0660298	0.0558	0.259961	Pip5k1c	0.737003
828	3309	O70166	Cortex KI_vs_WT	-0.16628	0.0598	0.0166883	Stmn3	0.203007
829	3313	O70172	Cortex KI_vs_WT	0.169807	0.111386	0.153299	Pip4k2a	0.615059
830	3317	O70174	Cortex KI_vs_WT	-0.0314932	0.0917	0.737293	Chrna4	0.9892
831	3321	O70176	Cortex KI_vs_WT	-0.0443429	0.115794	0.708456	Adcyap1	0.974874
832	3325	O70194	Cortex KI_vs_WT	-0.005662	0.0709	0.937633	Eif3d	1
833	3329	O70200	Cortex KI_vs_WT	0.530055	0.34719	0.152753	Aif1	0.61409
834	3333	O70209	Cortex KI_vs_WT	-0.0762868	0.163942	0.650028	Pdlim3	0.946772
835	3337	O70220	Cortex KI_vs_WT	NA	NA	NA	Foxq1	NA
836	3341	O70228	Cortex KI_vs_WT	-0.0156048	0.0498	0.759191	Atp9a	1
837	3345	O70250	Cortex KI_vs_WT	-0.299618	0.159091	0.0841153	Pgam2	0.488719
838	3349	O70251	Cortex KI_vs_WT	0.000857144	0.146537	0.995429	Eef1b2	1
839	3353	O70252	Cortex KI_vs_WT	0.222655	0.102339	0.0502829	Hmox2	0.379608
840	3357	O70258	Cortex KI_vs_WT	NA	NA	NA	Sgce	NA
841	3361	O70274	Cortex KI_vs_WT	-0.749299	0.387369	0.077	Ptp4a2	0.469082
842	3365	O70279	Cortex KI_vs_WT	0.586867	0.452557	0.226966	Ess2	0.703031
843	3369	O70281	Cortex KI_vs_WT	NA	NA	NA	Tpst1	NA
844	3373	O70293	Cortex KI_vs_WT	-0.0759614	0.0667	0.277002	Grk6	0.751932
845	3377	O70293;O70291	Cortex KI_vs_WT	-0.338269	0.300696	0.282607	NA	0.755948
846	3381	O70305	Cortex KI_vs_WT	0.0790187	0.0651	0.248216	Atxn2	0.725826
847	3385	O70309	Cortex KI_vs_WT	-0.0393456	0.0889	0.665816	Itgb5	0.954334
848	3389	O70310	Cortex KI_vs_WT	-0.112879	0.0663	0.114293	Nmt1	0.557399
849	3393	O70311	Cortex KI_vs_WT	-0.0740569	0.045	0.125992	Nmt2	0.575699
850	3397	O70318	Cortex KI_vs_WT	-0.0271362	0.0724	0.714287	Epb41l2	0.977443
851	3401	O70325	Cortex KI_vs_WT	0.335912	0.039	1.74e-06	Gpx4	0.000180738
852	3405	O70340	Cortex KI_vs_WT	-0.231602	0.136647	0.115866	Nptx2	0.558813
853	3409	O70342	Cortex KI_vs_WT	0.224314	0.265139	0.429983	Npy5r	0.842782
854	3413	O70348	Cortex KI_vs_WT	NA	NA	NA	Dxo	NA
855	3417	O70354	Cortex KI_vs_WT	0.0331636	0.180964	0.857653	Car11	1
856	3421	O70362	Cortex KI_vs_WT	0.0559144	0.101785	0.59285	NA	0.917719
857	3425	O70370	Cortex KI_vs_WT	-0.039067	0.160812	0.812158	Ctss	1
858	3429	O70378	Cortex KI_vs_WT	-0.0282274	0.135555	0.838538	Emc8	1
859	3433	O70400	Cortex KI_vs_WT	-0.0145208	0.129952	0.912877	Pdlim1	1
860	3437	O70401	Cortex KI_vs_WT	-0.131319	0.113042	0.267949	NA	0.745011
861	3441	O70404	Cortex KI_vs_WT	-0.132354	0.0962	0.19409	Vamp8	0.668157
862	3445	O70405	Cortex KI_vs_WT	0.246289	0.261051	0.364059	Ulk1	0.810225
863	3449	O70422	Cortex KI_vs_WT	-0.017768	0.0806	0.829205	Gtf2h4	1
864	3453	O70423	Cortex KI_vs_WT	-0.189039	0.191865	0.343942	Aoc3	0.796572
865	3457	O70423;Q812C9	Cortex KI_vs_WT	-0.0976643	0.15235	0.53354	NA	0.889842
866	3461	O70433	Cortex KI_vs_WT	0.179904	0.121551	0.164623	Fhl2	0.631379
867	3465	O70435	Cortex KI_vs_WT	-0.0701165	0.038	0.0895268	Psma3	0.502694
868	3469	O70439	Cortex KI_vs_WT	-0.0376639	0.108311	0.73406	NA	0.987972
869	3473	O70443	Cortex KI_vs_WT	0.112797	0.0657	0.111606	Gnaz	0.552711
870	3477	O70456	Cortex KI_vs_WT	-0.189213	0.172674	0.294681	Sfn	0.762847
871	3481	O70475	Cortex KI_vs_WT	-0.191076	0.129853	0.166895	Ugdh	0.633904
872	3485	O70480	Cortex KI_vs_WT	0.34534	0.319266	0.300658	Vamp4	0.767329
873	3489	O70481	Cortex KI_vs_WT	-0.0407165	0.0374	0.298238	Ubr1	0.766198
874	3493	O70492	Cortex KI_vs_WT	-0.179006	0.13523	0.21026	NA	0.685271
875	3497	O70493	Cortex KI_vs_WT	0.0772884	0.0677	0.275938	Snx12	0.751321
876	3501	O70494	Cortex KI_vs_WT	NA	NA	NA	Sp3	NA
877	3505	O70496	Cortex KI_vs_WT	-0.0647191	0.0617	0.31461	Clcn7	0.778229
878	3509	O70503	Cortex KI_vs_WT	-0.0191961	0.0966	0.845761	Hsd17b12	1
879	3513	O70507	Cortex KI_vs_WT	-0.187954	0.11799	0.137154	NA	0.590661
880	3517	O70551	Cortex KI_vs_WT	0.406847	0.116172	0.00436493	Srpk1	0.0859837
881	3521	O70566	Cortex KI_vs_WT	0.0268138	0.0577	0.650635	Diaph2	0.946975
882	3525	O70572	Cortex KI_vs_WT	-0.148925	0.082	0.0945586	Smpd2	0.514945
883	3529	O70579	Cortex KI_vs_WT	NA	NA	NA	Slc25a17	NA
884	3533	O70585	Cortex KI_vs_WT	0.0596566	0.125463	0.642976	Dtnb	0.943158
885	3537	O70589	Cortex KI_vs_WT	0.135035	0.0516	0.0224556	Cask	0.244596
886	3541	O70591	Cortex KI_vs_WT	-0.00526105	0.0869	0.952703	Pfdn2	1
887	3545	O70622	Cortex KI_vs_WT	-0.0413156	0.0968	0.676983	Rtn2	0.958804
888	3549	O70628	Cortex KI_vs_WT	NA	NA	NA	Pde9a	NA
889	3553	O88196	Cortex KI_vs_WT	0.0356027	0.10438	0.738936	NA	0.98978
890	3557	O88271	Cortex KI_vs_WT	-0.0469155	0.104605	0.661784	Cfdp1	0.952272
891	3561	O88273	Cortex KI_vs_WT	NA	NA	NA	Grem2	NA
892	3565	O88286	Cortex KI_vs_WT	0.131995	0.132034	0.337188	Wiz	0.792967
893	3569	O88291	Cortex KI_vs_WT	0.104804	0.067	0.143931	Zfp326	0.600365
894	3573	O88307	Cortex KI_vs_WT	0.207453	0.124217	0.12076	Sorl1	0.567034
895	3577	O88322	Cortex KI_vs_WT	0.0542526	0.0785	0.502519	Nid2	0.876288
896	3581	O88325	Cortex KI_vs_WT	NA	NA	NA	Naglu	NA
897	3585	O88342	Cortex KI_vs_WT	0.0468877	0.0351	0.206037	Wdr1	0.680966
898	3589	O88343	Cortex KI_vs_WT	0.0168684	0.0879	0.850955	Slc4a4	1
899	3593	O88351	Cortex KI_vs_WT	0.0619999	0.0804	0.455567	Ikbkb	0.855076
900	3597	O88384	Cortex KI_vs_WT	0.00235742	0.0566	0.967476	NA	1
901	3601	O88393	Cortex KI_vs_WT	NA	NA	NA	Tgfbr3	NA
902	3605	O88413	Cortex KI_vs_WT	0.107012	0.102791	0.318367	Tulp3	0.781213
903	3609	O88428	Cortex KI_vs_WT	-0.151608	0.0884	0.112159	Papss2	0.553768
904	3613	O88441	Cortex KI_vs_WT	0.201609	0.0659	0.00993769	Mtx2	0.146052
905	3617	O88444	Cortex KI_vs_WT	0.373946	0.0915	0.00150735	Adcy1	0.0387204
906	3621	O88447	Cortex KI_vs_WT	0.0943845	0.131471	0.486553	NA	0.869235
907	3625	O88448	Cortex KI_vs_WT	0.113223	0.0387	0.01263	NA	0.170845
908	3629	O88455	Cortex KI_vs_WT	0.115483	0.212234	0.596318	Dhcr7	0.91895
909	3633	O88456	Cortex KI_vs_WT	0.280914	0.0768	0.00329131	Capns1	0.0698162
910	3637	O88456;Q9D7J7	Cortex KI_vs_WT	NA	NA	NA	NA	NA
911	3641	O88485	Cortex KI_vs_WT	0.00129187	0.0776	0.986984	Dync1i1	1
912	3645	O88487	Cortex KI_vs_WT	0.100481	0.0715	0.185087	Dync1i2	0.658898
913	3649	O88491	Cortex KI_vs_WT	0.12349	0.120094	0.324098	NA	0.784873
914	3653	O88492	Cortex KI_vs_WT	0.194951	0.178384	0.295905	Plin4	0.76416
915	3657	O88495	Cortex KI_vs_WT	-0.432883	0.191131	0.0428345	Gpr50	0.350136
916	3661	O88502	Cortex KI_vs_WT	0.0908862	0.136551	0.518266	Pde8a	0.884141
917	3665	O88507	Cortex KI_vs_WT	-0.108387	0.0617	0.1043	Cntfr	0.535924
918	3669	O88520	Cortex KI_vs_WT	-0.190935	0.0875	0.0497273	Shoc2	0.376923
919	3673	O88522	Cortex KI_vs_WT	0.0455676	0.0654	0.499142	Ikbkg	0.875208
920	3677	O88531	Cortex KI_vs_WT	0.0133312	0.11306	0.908088	Ppt1	1
921	3681	O88532	Cortex KI_vs_WT	0.0617239	0.0521	0.259279	Zfr	0.736223
922	3685	O88533	Cortex KI_vs_WT	-0.153951	0.0838	0.0909581	Ddc	0.506091
923	3689	O88543	Cortex KI_vs_WT	0.0419047	0.0473	0.39327	Cops3	0.825827
924	3693	O88544	Cortex KI_vs_WT	-0.0687867	0.0638	0.301964	Cops4	0.768679
925	3697	O88545	Cortex KI_vs_WT	-0.0919566	0.0451	0.0643485	Cops6	0.429559
926	3701	O88554	Cortex KI_vs_WT	0.470719	0.168794	0.0163833	Parp2	0.200377
927	3705	O88559	Cortex KI_vs_WT	0.0393387	0.162809	0.81315	Men1	1
928	3709	O88561	Cortex KI_vs_WT	-0.17944	0.105598	0.115018	Slc27a3	0.558203
929	3713	O88569	Cortex KI_vs_WT	0.0699165	0.0705	0.341074	Hnrnpa2b1	0.795834
930	3717	O88572	Cortex KI_vs_WT	0.0329924	0.212994	0.879477	Lrp6	1
931	3721	O88587	Cortex KI_vs_WT	0.297979	0.20587	0.173396	Comt	0.642442
932	3725	O88597	Cortex KI_vs_WT	0.169137	0.108927	0.146444	Becn1	0.604698
933	3729	O88602	Cortex KI_vs_WT	0.150623	0.14331	0.31395	Cacng2	0.778119
934	3733	O88622	Cortex KI_vs_WT	0.196595	0.077	0.0252706	NA	0.26244
935	3737	O88630	Cortex KI_vs_WT	0.0439836	0.0473	0.370658	Gosr1	0.814114
936	3741	O88643	Cortex KI_vs_WT	-0.173966	0.0475	0.00324956	NA	0.0691029
937	3745	O88653	Cortex KI_vs_WT	-0.201181	0.151809	0.209774	Lamtor3	0.684302
938	3749	O88665	Cortex KI_vs_WT	0.0411271	0.292962	0.892951	Brd7	1
939	3753	O88667	Cortex KI_vs_WT	-0.783018	0.318371	0.0300687	NA	0.290364
940	3757	O88685	Cortex KI_vs_WT	-1.14e-05	0.0382	0.999767	Psmc3	1
941	3761	O88693	Cortex KI_vs_WT	0.0229802	0.353026	0.94917	Ugcg	1
942	3765	O88696	Cortex KI_vs_WT	-0.128584	0.0622	0.0608316	Clpp	0.417534
943	3769	O88697	Cortex KI_vs_WT	-0.00316473	0.101852	0.975723	Stk16	1
944	3773	O88703	Cortex KI_vs_WT	0.210592	0.122352	0.110868	Hcn2	0.55035
945	3777	O88704	Cortex KI_vs_WT	0.159261	0.0829	0.0789286	Hcn1	0.474976
946	3781	O88705	Cortex KI_vs_WT	-0.146684	0.11172	0.213749	Hcn3	0.689363
947	3785	O88708	Cortex KI_vs_WT	0.275026	0.184523	0.16191	Orc4	0.627859
948	3789	O88712	Cortex KI_vs_WT	0.00108986	0.0704	0.987908	Ctbp1	1
949	3793	O88735	Cortex KI_vs_WT	-0.134759	0.06	0.044445	Map7	0.355523
950	3797	O88736	Cortex KI_vs_WT	0.496472	0.139052	0.00384953	Hsd17b7	0.0784788
951	3801	O88737	Cortex KI_vs_WT	0.0177692	0.0437	0.691702	Bsn	0.966008
952	3805	O88738	Cortex KI_vs_WT	0.0648852	0.0491	0.210793	Birc6	0.686001
953	3809	O88741	Cortex KI_vs_WT	0.103413	0.0707	0.16948	Gdap1	0.637125
954	3813	O88745	Cortex KI_vs_WT	0.0574759	0.0839	0.506498	Scrg1	0.878119
955	3817	O88746	Cortex KI_vs_WT	-0.21763	0.072	0.0105947	Tom1	0.152286
956	3821	O88792	Cortex KI_vs_WT	-0.093177	0.0961	0.351313	F11r	0.802018
957	3825	O88796	Cortex KI_vs_WT	0.105141	0.0904	0.267251	Rpp30	0.744416
958	3829	O88809	Cortex KI_vs_WT	-0.309784	0.122961	0.0269406	Dcx	0.272598
959	3833	O88811	Cortex KI_vs_WT	-0.0357563	0.0578	0.547605	Stam2	0.895714
960	3837	O88819	Cortex KI_vs_WT	0.0450729	0.174033	0.800032	Fut9	1
961	3841	O88824	Cortex KI_vs_WT	NA	NA	NA	Jtb	NA
962	3845	O88829	Cortex KI_vs_WT	-0.0874011	0.0663	0.211744	St3gal5	0.686901
963	3849	O88834	Cortex KI_vs_WT	0.223354	0.115224	0.0764538	Shd	0.4682
964	3853	O88839	Cortex KI_vs_WT	0.0216373	0.0781	0.786441	Adam15	1
965	3857	O88842	Cortex KI_vs_WT	NA	NA	NA	NA	NA
966	3861	O88843	Cortex KI_vs_WT	NA	NA	NA	Cradd	NA
967	3865	O88844	Cortex KI_vs_WT	0.0531485	0.0547	0.350393	Idh1	0.801127
968	3869	O88845	Cortex KI_vs_WT	0.0657422	0.0721	0.379517	Akap10	0.819411
969	3873	O88848	Cortex KI_vs_WT	-0.0812997	0.157622	0.615372	Arl6	0.928796
970	3877	O88851	Cortex KI_vs_WT	0.0899049	0.0892	0.333453	Rbbp9	0.789955
971	3881	O88852	Cortex KI_vs_WT	-0.130158	0.1858	0.496957	Tspyl1	0.87416
972	3885	O88874	Cortex KI_vs_WT	0.0567331	0.0707	0.437765	NA	0.846211
973	3889	O88876	Cortex KI_vs_WT	NA	NA	NA	Dhrs3	NA
974	3893	O88878	Cortex KI_vs_WT	-0.12395	0.255377	0.636161	Zfand5	0.939799
975	3897	O88879	Cortex KI_vs_WT	NA	NA	NA	Apaf1	NA
976	3901	O88888	Cortex KI_vs_WT	0.107136	0.149463	0.48721	Apba3	0.869399
977	3905	O88895	Cortex KI_vs_WT	0.0451484	0.104086	0.672157	NA	0.957136
978	3909	O88907;Q8C5D8	Cortex KI_vs_WT	-0.320587	0.310855	0.322736	NA	0.784071
979	3913	O88909	Cortex KI_vs_WT	-0.128798	0.206968	0.556633	Slc22a8	0.900332
980	3917	O88910	Cortex KI_vs_WT	0.0695817	0.0869	0.438799	NA	0.846598
981	3921	O88935	Cortex KI_vs_WT	0.0154715	0.0887	0.864396	Syn1	1
982	3925	O88939	Cortex KI_vs_WT	-0.0342193	0.163636	0.837864	Zbtb7a	1
983	3929	O88951	Cortex KI_vs_WT	-0.0567605	0.0823	0.503529	Lin7b	0.876372
984	3933	O88952	Cortex KI_vs_WT	-0.164722	0.106297	0.147188	Lin7c	0.605694
985	3937	O88958	Cortex KI_vs_WT	-0.0187833	0.0521	0.724528	Gnpda1	0.98233
986	3941	O88967	Cortex KI_vs_WT	-0.0587997	0.0385	0.152989	Yme1l1	0.614455
987	3945	O88968	Cortex KI_vs_WT	NA	NA	NA	Tcn2	NA
988	3949	O88974	Cortex KI_vs_WT	0.139705	0.117245	0.256467	NA	0.733982
989	3953	O88983	Cortex KI_vs_WT	-0.0238143	0.0842	0.782187	Stx8	1
990	3957	O88986	Cortex KI_vs_WT	0.168188	0.0999	0.118084	Gcat	0.561663
991	3961	O88990	Cortex KI_vs_WT	0.425201	0.38217	0.287674	Actn3	0.758522
992	3965	O88998	Cortex KI_vs_WT	-0.0606549	0.0719	0.415522	Olfm1	0.836268
993	3969	O89001	Cortex KI_vs_WT	-0.100798	0.0486	0.0602306	Cpd	0.415605
994	3973	O89017	Cortex KI_vs_WT	-0.0573302	0.119954	0.641285	Lgmn	0.942742
995	3977	O89020	Cortex KI_vs_WT	-0.23748	0.156612	0.155319	Afm	0.617705
996	3981	O89023	Cortex KI_vs_WT	-0.708535	0.261901	0.019119	Tpp1	0.221807
997	3985	O89026	Cortex KI_vs_WT	-0.235031	0.0849	0.0169842	Robo1	0.204862
998	3989	O89029	Cortex KI_vs_WT	-0.332645	0.129391	0.0245076	Matn4	0.257577
999	3993	O89032	Cortex KI_vs_WT	-0.140749	0.091	0.147933	Sh3pxd2a	0.606343
1000	3997	O89050	Cortex KI_vs_WT	0.0486162	0.10892	0.663293	Mkln1	0.953062
1001	4001	O89051	Cortex KI_vs_WT	0.141069	0.0972	0.172261	Itm2b	0.640729
1002	4005	O89053	Cortex KI_vs_WT	0.0225134	0.0485	0.65112	Coro1a	0.947065
1003	4009	O89079	Cortex KI_vs_WT	0.0863944	0.101803	0.412691	Cope	0.835752
1004	4013	O89084	Cortex KI_vs_WT	0.33402	0.131834	0.0262428	Pde4a	0.268522
1005	4017	O89086	Cortex KI_vs_WT	0.129168	0.123512	0.316267	Rbm3	0.779281
1006	4021	O89103	Cortex KI_vs_WT	0.506074	0.147428	0.0139252	Cd93	0.181783
1007	4025	O89106	Cortex KI_vs_WT	0.192639	0.10378	0.0881333	Fhit	0.499046
1008	4029	O89112	Cortex KI_vs_WT	0.0298842	0.0329	0.381152	Lancl1	0.819895
1009	4033	O89114	Cortex KI_vs_WT	0.194497	0.0922	0.0564967	NA	0.401658
1010	4037	O89116	Cortex KI_vs_WT	-0.0345116	0.130033	0.795201	Vti1a	1
1011	4041	P00158	Cortex KI_vs_WT	-0.0987121	0.329827	0.769843	CYTB	1
1012	4045	P00375	Cortex KI_vs_WT	0.017449	0.108403	0.8748	Dhfr	1
1013	4049	P00405	Cortex KI_vs_WT	0.0703166	0.181885	0.70582	COX2	0.973139
1014	4053	P00416	Cortex KI_vs_WT	0.447704	0.234916	0.0809071	COX3	0.479321
1015	4057	P00493	Cortex KI_vs_WT	-0.112683	0.0455	0.0291103	Hprt1	0.285373
1016	4061	P00520	Cortex KI_vs_WT	-0.163685	0.0973	0.118262	Abl1	0.562001
1017	4065	P00755	Cortex KI_vs_WT	-0.0795449	0.333381	0.815441	Klk1b1	1
1018	4069	P00848	Cortex KI_vs_WT	0.248543	0.401197	0.547167	ATP6	0.895564
1019	4073	P00920	Cortex KI_vs_WT	-0.046633	0.0997	0.648467	Car2	0.946248
1020	4077	P01027	Cortex KI_vs_WT	-0.209075	0.174361	0.253635	C3	0.730492
1021	4081	P01029	Cortex KI_vs_WT	0.117311	0.135781	0.404542	C4b	0.831807
1022	4085	P01193	Cortex KI_vs_WT	-0.339755	0.176777	0.0786754	Pomc	0.474089
1023	4089	P01831	Cortex KI_vs_WT	-0.092989	0.109239	0.411299	Thy1	0.835695
1024	4093	P01837	Cortex KI_vs_WT	-0.0876377	0.300586	0.775605	NA	1
1025	4097	P01867	Cortex KI_vs_WT	-0.10957	0.282534	0.704946	NA	0.972883
1026	4101	P01869	Cortex KI_vs_WT	0.188631	0.286872	0.523245	NA	0.885802
1027	4105	P01872	Cortex KI_vs_WT	-0.351931	0.242983	0.173132	NA	0.642106
1028	4109	P01887	Cortex KI_vs_WT	-0.000954318	0.122797	0.993927	B2m	1
1029	4113	P01897	Cortex KI_vs_WT	0.387752	0.141684	0.0180399	NA	0.213009
1030	4117	P01897;P01896	Cortex KI_vs_WT	0.612701	0.149356	0.00146635	NA	0.0379116
1031	4121	P01897;P14427	Cortex KI_vs_WT	NA	NA	NA	NA	NA
1032	4125	P01898	Cortex KI_vs_WT	0.0728422	0.144204	0.622615	H2-Q10	0.932544
1033	4129	P01901	Cortex KI_vs_WT	0.175354	0.214356	0.429275	H2-K1	0.842417
1034	4133	P01942	Cortex KI_vs_WT	-0.287967	0.249189	0.270329	NA	0.74738
1035	4137	P02088	Cortex KI_vs_WT	-0.314207	0.238507	0.212306	Hbb-b1	0.687432
1036	4141	P02463;Q63ZW6	Cortex KI_vs_WT	0.118492	0.159536	0.485697	NA	0.869065
1037	4145	P02468	Cortex KI_vs_WT	0.118233	0.0873	0.200743	NA	0.675152
1038	4149	P02469	Cortex KI_vs_WT	-0.0457589	0.102261	0.662506	Lamb1	0.952622
1039	4153	P03888	Cortex KI_vs_WT	0.180595	0.283581	0.536191	ND1	0.890789
1040	4157	P03899	Cortex KI_vs_WT	0.162181	0.170638	0.360641	ND3	0.808753
1041	4161	P03911	Cortex KI_vs_WT	0.13758	0.1311	0.314658	ND4	0.778229
1042	4165	P03921	Cortex KI_vs_WT	0.22646	0.216248	0.315631	ND5	0.779137
1043	4169	P03930	Cortex KI_vs_WT	0.200855	0.405431	0.629258	ATP8	0.936555
1044	4173	P03953	Cortex KI_vs_WT	0.166036	0.555716	0.77022	Cfd	1
1045	4177	P03958	Cortex KI_vs_WT	0.195208	0.155201	0.232399	Ada	0.70907
1046	4181	P03975	Cortex KI_vs_WT	0.0790529	0.0916	0.405034	NA	0.832212
1047	4185	P03995	Cortex KI_vs_WT	-0.304962	0.182936	0.121371	Gfap	0.567843
1048	4189	P04117	Cortex KI_vs_WT	-0.681466	0.398908	0.113289	Fabp4	0.555691
1049	4193	P04186	Cortex KI_vs_WT	0.0130098	0.133036	0.923712	NA	1
1050	4197	P04247	Cortex KI_vs_WT	-0.456909	0.212356	0.0524915	Mb	0.387498
1051	4201	P04370	Cortex KI_vs_WT	0.289013	0.224554	0.222348	Mbp	0.697951
1052	4205	P04627	Cortex KI_vs_WT	-0.0353107	0.0673	0.609559	Araf	0.925369
1053	4209	P04919	Cortex KI_vs_WT	-0.172713	0.228454	0.464227	Slc4a1	0.859747
1054	4213	P04925	Cortex KI_vs_WT	-0.256822	0.197341	0.217548	Prnp	0.693742
1055	4217	P04939;Q80YX8	Cortex KI_vs_WT	0.416937	0.5222	0.440141	NA	0.846686
1056	4221	P05063	Cortex KI_vs_WT	-0.0839901	0.0885	0.361538	Aldoc	0.809086
1057	4225	P05064	Cortex KI_vs_WT	-0.218018	0.0795	0.0178898	Aldoa	0.211726
1058	4229	P05064;A6ZI46	Cortex KI_vs_WT	-0.0669719	0.124158	0.599471	NA	0.92025
1059	4233	P05064;A6ZI46;A6ZI47	Cortex KI_vs_WT	-0.174316	0.177574	0.345649	NA	0.798093
1060	4237	P05064;A6ZI47	Cortex KI_vs_WT	-0.0896376	0.0687	0.216292	NA	0.692559
1061	4241	P05132	Cortex KI_vs_WT	-0.667001	0.205417	0.00699449	Prkaca	0.117152
1062	4245	P05201	Cortex KI_vs_WT	0.0100629	0.077	0.898252	Got1	1
1063	4249	P05202	Cortex KI_vs_WT	0.0140429	0.0427	0.74769	Got2	0.994295
1064	4253	P05480	Cortex KI_vs_WT	-0.188083	0.0469	0.00171713	Src	0.042791
1065	4257	P05480;P16056;Q62190;Q922K9;Q62270	Cortex KI_vs_WT	-0.048246	0.0755	0.534766	NA	0.890341
1066	4261	P05532	Cortex KI_vs_WT	-0.250858	0.118717	0.0562234	Kit	0.400792
1067	4265	P05555	Cortex KI_vs_WT	0.257097	0.129647	0.070724	NA	0.451636
1068	4269	P05622	Cortex KI_vs_WT	0.0517192	0.071	0.480567	Pdgfrb	0.86719
1069	4273	P05977	Cortex KI_vs_WT	-0.690525	0.347728	0.0703829	Myl1	0.451089
1070	4277	P06151	Cortex KI_vs_WT	0.00991696	0.0985	0.921506	Ldha	1
1071	4281	P06537	Cortex KI_vs_WT	0.189463	0.0769	0.029772	NA	0.288703
1072	4285	P06684	Cortex KI_vs_WT	0.06799	0.310788	0.830508	Hc	1
1073	4289	P06728	Cortex KI_vs_WT	0.0201194	0.228541	0.931302	Apoa4	1
1074	4293	P06745	Cortex KI_vs_WT	-0.132762	0.0659	0.0670624	Gpi1	0.439303
1075	4297	P06745;CON__Q3ZBD7	Cortex KI_vs_WT	0.00669184	0.0647	0.919371	NA	1
1076	4301	P06797	Cortex KI_vs_WT	-0.038008	0.101472	0.714519	Ctsl	0.977553
1077	4305	P06800	Cortex KI_vs_WT	0.00417072	0.165315	0.980287	NA	1
1078	4309	P06801	Cortex KI_vs_WT	0.144086	0.175369	0.427317	Me1	0.841723
1079	4313	P06802	Cortex KI_vs_WT	0.117841	0.105728	0.286863	Enpp1	0.758519
1080	4317	P06837	Cortex KI_vs_WT	-0.442865	0.349264	0.22885	Gap43	0.705194
1081	4321	P06880	Cortex KI_vs_WT	NA	NA	NA	Gh	NA
1082	4325	P06909	Cortex KI_vs_WT	0.0562374	0.135237	0.684865	Cfh	0.962407
1083	4329	P06909;A0A668KLU9	Cortex KI_vs_WT	NA	NA	NA	NA	NA
1084	4333	P07091	Cortex KI_vs_WT	NA	NA	NA	S100a4	NA
1085	4337	P07214	Cortex KI_vs_WT	0.066574	0.0775	0.407009	Sparc	0.833449
1086	4341	P07309	Cortex KI_vs_WT	0.546933	0.338364	0.131976	Ttr	0.584507
1087	4345	P07310	Cortex KI_vs_WT	-0.6446	0.348884	0.0894469	Ckm	0.502618
1088	4349	P07356	Cortex KI_vs_WT	-0.128492	0.202421	0.537489	Anxa2	0.891341
1089	4353	P07628;P36369	Cortex KI_vs_WT	NA	NA	NA	NA	NA
1090	4357	P07628;P36369;P36368	Cortex KI_vs_WT	0.874898	0.296948	0.012228	NA	0.167813
1091	4361	P07724	Cortex KI_vs_WT	-0.200665	0.201636	0.339292	Alb	0.794529
1092	4365	P07742	Cortex KI_vs_WT	0.0150842	0.158879	0.925928	Rrm1	1
1093	4369	P07759	Cortex KI_vs_WT	0.366417	0.320078	0.274622	Serpina3k	0.750625
1094	4373	P07901	Cortex KI_vs_WT	-0.052546	0.0502	0.31539	Hsp90aa1	0.778957
1095	4377	P07903	Cortex KI_vs_WT	0.0305702	0.0973	0.758804	Ercc1	1
1096	4381	P07934	Cortex KI_vs_WT	0.0502835	0.0531	0.362002	Phkg1	0.809086
1097	4385	P08003	Cortex KI_vs_WT	-0.0257385	0.0519	0.628782	Pdia4	0.936228
1098	4389	P08030	Cortex KI_vs_WT	0.128914	0.142273	0.382716	Aprt	0.820376
1099	4393	P08032	Cortex KI_vs_WT	-0.214114	0.176884	0.249398	Spta1	0.72693
1100	4397	P08113	Cortex KI_vs_WT	-0.17594	0.0496	0.00403401	Hsp90b1	0.0814513
1101	4401	P08122	Cortex KI_vs_WT	0.408345	0.295236	0.191823	Col4a2	0.664617
1102	4405	P08207	Cortex KI_vs_WT	0.330583	0.335818	0.344346	S100a10	0.797169
1103	4409	P08226	Cortex KI_vs_WT	-0.0633308	0.0521	0.247585	Apoe	0.725243
1104	4413	P08228	Cortex KI_vs_WT	-0.317224	0.102912	0.00949386	Sod1	0.141677
1105	4417	P08249	Cortex KI_vs_WT	0.0775383	0.0633	0.243991	Mdh2	0.721016
1106	4421	P08414	Cortex KI_vs_WT	0.0610496	0.0795	0.457195	NA	0.855797
1107	4425	P08414;P58801	Cortex KI_vs_WT	-0.0324625	0.159881	0.842505	NA	1
1108	4429	P08551	Cortex KI_vs_WT	0.572884	0.171191	0.005818	Nefl	0.104212
1109	4433	P08553	Cortex KI_vs_WT	0.587176	0.153539	0.00242058	Nefm	0.0556779
1110	4437	P08556	Cortex KI_vs_WT	0.0485146	0.0766	0.538426	NA	0.891626
1111	4441	P08752	Cortex KI_vs_WT	-0.0648208	0.0499	0.218068	Gnai2	0.694164
1112	4445	P08775	Cortex KI_vs_WT	0.138559	0.0487	0.0147414	Polr2a	0.188593
1113	4449	P08905	Cortex KI_vs_WT	-0.0908342	0.178416	0.628847	Lyz2	0.936248
1114	4453	P09055	Cortex KI_vs_WT	0.11037	0.0908	0.247642	Itgb1	0.725289
1115	4457	P09103	Cortex KI_vs_WT	-0.0382801	0.0373	0.325202	P4hb	0.78525
1116	4461	P09240	Cortex KI_vs_WT	-0.0374021	0.147407	0.803997	Cck	1
1117	4465	P09242	Cortex KI_vs_WT	0.0186132	0.139666	0.896189	Alpl	1
1118	4469	P09405	Cortex KI_vs_WT	0.17543	0.105729	0.122955	Ncl	0.571355
1119	4473	P09411	Cortex KI_vs_WT	0.00279843	0.0511	0.957261	Pgk1	1
1120	4477	P09411;P09041	Cortex KI_vs_WT	-0.0406619	0.0856	0.643329	NA	0.94351
1121	4481	P09470	Cortex KI_vs_WT	-0.0339426	0.113427	0.769872	Ace	1
1122	4485	P09528	Cortex KI_vs_WT	0.361402	0.242887	0.162567	Fth1	0.628775
1123	4489	P09541	Cortex KI_vs_WT	0.608306	0.294728	0.0613404	NA	0.418672
1124	4493	P09581	Cortex KI_vs_WT	-0.0560441	0.0971	0.574374	Csf1r	0.909041
1125	4497	P09671	Cortex KI_vs_WT	0.0715698	0.0831	0.40603	Sod2	0.832775
1126	4501	P09813	Cortex KI_vs_WT	-0.121284	0.209424	0.573213	Apoa2	0.908493
1127	4505	P09925	Cortex KI_vs_WT	-0.0422053	0.065	0.528261	Surf1	0.887272
1128	4509	P09926	Cortex KI_vs_WT	-0.644806	0.478127	0.202365	Surf2	0.676751
1129	4513	P0C028;P0C027	Cortex KI_vs_WT	-0.248667	0.0488	0.000262805	NA	0.0101663
1130	4517	P0C090	Cortex KI_vs_WT	0.344393	0.241036	0.178571	Rc3h2	0.649711
1131	4521	P0C0A3	Cortex KI_vs_WT	-0.0747213	0.0935	0.439707	Chmp6	0.846686
1132	4525	P0C192	Cortex KI_vs_WT	-0.0487681	0.0635	0.457526	Lrrc4b	0.856016
1133	4529	P0C1Q2	Cortex KI_vs_WT	0.288252	0.113002	0.0254258	Pde11a	0.263668
1134	4533	P0C605	Cortex KI_vs_WT	-0.148704	0.0844	0.10364	Prkg1	0.534573
1135	4537	P0C673	Cortex KI_vs_WT	-0.123567	0.159018	0.452169	Igsf11	0.852961
1136	4541	P0C6F1	Cortex KI_vs_WT	-0.0430791	0.400093	0.916035	NA	1
1137	4545	P0C7L0	Cortex KI_vs_WT	-0.158914	0.100691	0.140497	NA	0.594913
1138	4549	P0C7M9	Cortex KI_vs_WT	0.132947	0.103691	0.224008	Clec2l	0.700037
1139	4553	P0C7N9	Cortex KI_vs_WT	-0.121099	0.103483	0.264625	Psmg4	0.741631
1140	4557	P0C7T6	Cortex KI_vs_WT	0.0490884	0.11234	0.677425	Atxn1l	0.958804
1141	4561	P0C872	Cortex KI_vs_WT	NA	NA	NA	Jmjd7	NA
1142	4565	P0C913	Cortex KI_vs_WT	0.373792	0.467122	0.439149	1500009L16Rik	0.846598
1143	4569	P0CG14	Cortex KI_vs_WT	0.0755504	0.103063	0.477605	Chtf8	0.865218
1144	4573	P0CL69;Q7TMA2	Cortex KI_vs_WT	NA	NA	NA	NA	NA
1145	4577	P0DJE0	Cortex KI_vs_WT	0.92295	0.431806	0.0538383	Pet100	0.392787
1146	4581	P0DN34	Cortex KI_vs_WT	0.0477881	0.127388	0.714105	NA	0.977443
1147	4585	P0DN89	Cortex KI_vs_WT	0.0469596	0.187501	0.806476	Tmem254	1
1148	4589	P0DP28;P0DP27;P0DP26	Cortex KI_vs_WT	-0.794691	0.244085	0.00688213	NA	0.115974
1149	4593	P0DP28;P0DP27;P0DP26;P20801	Cortex KI_vs_WT	0.114834	0.130059	0.394614	NA	0.826762
1150	4597	P0DP60	Cortex KI_vs_WT	0.26879	0.135649	0.0709147	Lynx1	0.451848
1151	4601	P0DPD9	Cortex KI_vs_WT	NA	NA	NA	NA	NA
1152	4605	P0DW87	Cortex KI_vs_WT	0.0095408	0.0602	0.876806	NA	1
1153	4609	P10107	Cortex KI_vs_WT	-0.0192897	0.098	0.84726	Anxa1	1
1154	4613	P10126	Cortex KI_vs_WT	-0.153689	0.13328	0.271308	Eef1a1	0.748221
1155	4617	P10493	Cortex KI_vs_WT	0.0374035	0.0851	0.668166	Nid1	0.955277
1156	4621	P10518	Cortex KI_vs_WT	0.015693	0.101252	0.879406	Alad	1
1157	4625	P10605	Cortex KI_vs_WT	0.233364	0.0742	0.00847073	Ctsb	0.131783
1158	4629	P10630	Cortex KI_vs_WT	0.0838557	0.139562	0.559119	Eif4a2	0.901221
1159	4633	P10637	Cortex KI_vs_WT	-0.206457	0.119924	0.110799	Mapt	0.550312
1160	4637	P10639	Cortex KI_vs_WT	-0.105764	0.151022	0.497081	Txn1	0.87416
1161	4641	P10649	Cortex KI_vs_WT	0.0357104	0.142534	0.806409	Gstm1	1
1162	4645	P10711	Cortex KI_vs_WT	0.00591633	0.0591	0.921863	Tcea1	1
1163	4649	P10833	Cortex KI_vs_WT	0.0828486	0.122615	0.512056	Rras	0.881125
1164	4653	P10852	Cortex KI_vs_WT	0.0467033	0.0511	0.379165	Slc3a2	0.819224
1165	4657	P10922	Cortex KI_vs_WT	0.0912109	0.114898	0.442705	H1f0	0.847359
1166	4661	P11031	Cortex KI_vs_WT	0.312546	0.143333	0.049844	Sub1	0.377512
1167	4665	P11087	Cortex KI_vs_WT	-0.405003	0.412996	0.346124	Col1a1	0.79822
1168	4669	P11103	Cortex KI_vs_WT	0.0712023	0.0445	0.135494	NA	0.588917
1169	4673	P11214	Cortex KI_vs_WT	-0.215076	0.106972	0.0673923	Plat	0.44084
1170	4677	P11276	Cortex KI_vs_WT	-0.0929669	0.138051	0.51344	Fn1	0.882125
1171	4681	P11352	Cortex KI_vs_WT	-0.106449	0.113387	0.366343	Gpx1	0.811776
1172	4685	P11404	Cortex KI_vs_WT	0.241073	0.0946	0.0255321	Fabp3	0.26439
1173	4689	P11438	Cortex KI_vs_WT	-0.149305	0.0623	0.03368	Lamp1	0.30905
1174	4693	P11499	Cortex KI_vs_WT	-0.065384	0.0501	0.216583	Hsp90ab1	0.692647
1175	4697	P11531	Cortex KI_vs_WT	-0.00631631	0.0226	0.784339	Dmd	1
1176	4701	P11589;A2BIN1;Q4FZE8;P11588;A9R9W0;A2BIM8;P02762;A2CEK7;P04938;B5X0G2;P11591	Cortex KI_vs_WT	0.829842	0.524377	0.139514	NA	0.594246
1177	4705	P11589;A2BIN1;Q4FZE8;P11588;A9R9W0;A2BIM8;P02762;A2CEK7;P04938;E9PVW0;B5X0G2;E9QA79;L7N222	Cortex KI_vs_WT	0.865737	0.451392	0.0792251	NA	0.476011
1178	4709	P11589;A2BIN1;Q4FZE8;P11588;A9R9W0;A2BIM8;P02762;A2CEK7;P04938;E9PVW0;E9QA79	Cortex KI_vs_WT	-0.256844	0.796068	0.752519	NA	0.996817
1179	4713	P11627	Cortex KI_vs_WT	-0.100336	0.0984	0.327786	NA	0.786827
1180	4717	P11679	Cortex KI_vs_WT	NA	NA	NA	Krt8	NA
1181	4721	P11679;CON__H-INV:HIT000016045	Cortex KI_vs_WT	NA	NA	NA	NA	NA
1182	4725	P11679;CON__Q9H552	Cortex KI_vs_WT	NA	NA	NA	NA	NA
1183	4729	P11679;CON__REFSEQ:XP_092267	Cortex KI_vs_WT	NA	NA	NA	NA	NA
1184	4733	P11688	Cortex KI_vs_WT	0.000592937	0.215789	0.997853	Itga5	1
1185	4737	P11798	Cortex KI_vs_WT	-0.0432472	0.0821	0.607868	Camk2a	0.924315
1186	4741	P11835	Cortex KI_vs_WT	-0.00433009	0.0871	0.961157	Itgb2	1
1187	4745	P11859	Cortex KI_vs_WT	-0.19714	0.242503	0.432087	NA	0.843538
1188	4749	P11862	Cortex KI_vs_WT	0.112592	0.113536	0.340925	Gas2	0.795765
1189	4753	P11881	Cortex KI_vs_WT	0.105855	0.0563	0.0844385	Itpr1	0.48938
1190	4757	P11930	Cortex KI_vs_WT	0.25722	0.275021	0.368087	Nudt19	0.813234
1191	4761	P11983	Cortex KI_vs_WT	-0.102061	0.0456	0.0449294	Tcp1	0.35772
1192	4765	P12023	Cortex KI_vs_WT	0.160615	0.0564	0.014689	App	0.188321
1193	4769	P12032	Cortex KI_vs_WT	NA	NA	NA	Timp1	NA
1194	4773	P12265	Cortex KI_vs_WT	0.0150369	0.135407	0.913413	Gusb	1
1195	4777	P12367	Cortex KI_vs_WT	-0.170991	0.0369	0.000577235	NA	0.018835
1196	4781	P12382	Cortex KI_vs_WT	-0.0975312	0.0408	0.0341429	Pfkl	0.310899
1197	4785	P12657	Cortex KI_vs_WT	0.108393	0.137267	0.445057	Chrm1	0.848035
1198	4789	P12658	Cortex KI_vs_WT	-0.118134	0.07	0.117362	Calb1	0.561106
1199	4793	P12787	Cortex KI_vs_WT	0.0808604	0.105644	0.458823	Cox5a	0.85609
1200	4797	P12815	Cortex KI_vs_WT	-0.0495141	0.121235	0.690163	Pdcd6	0.964996
1201	4801	P12849	Cortex KI_vs_WT	-0.0691639	0.0675	0.325601	Prkar1b	0.785438
1202	4805	P12960	Cortex KI_vs_WT	-0.0684731	0.064	0.305817	Cntn1	0.771982
1203	4809	P12961	Cortex KI_vs_WT	0.067625	0.131674	0.61687	Scg5	0.929921
1204	4813	P12970	Cortex KI_vs_WT	0.0453435	0.0681	0.517898	Rpl7a	0.884141
1205	4817	P13020	Cortex KI_vs_WT	0.0811312	0.0863	0.365562	Gsn	0.811218
1206	4821	P13020;CON__Q3SX14	Cortex KI_vs_WT	0.195539	0.0948	0.0614272	NA	0.418851
1207	4825	P13346	Cortex KI_vs_WT	0.508644	0.43717	0.288803	Fosb	0.758522
1208	4829	P13405	Cortex KI_vs_WT	-0.383215	0.364841	0.316081	Rb1	0.779281
1209	4833	P13439	Cortex KI_vs_WT	0.0620658	0.0572	0.298821	Umps	0.766343
1210	4837	P13562	Cortex KI_vs_WT	NA	NA	NA	Gnrh1	NA
1211	4841	P13595	Cortex KI_vs_WT	-0.0732697	0.0797	0.37599	Ncam1	0.817598
1212	4845	P13597	Cortex KI_vs_WT	-0.000853183	0.129897	0.994867	Icam1	1
1213	4849	P13634	Cortex KI_vs_WT	-0.327747	0.20488	0.135647	Car1	0.588917
1214	4853	P13707	Cortex KI_vs_WT	0.39684	0.0899	0.000844672	Gpd1	0.0252305
1215	4857	P13864	Cortex KI_vs_WT	0.196889	0.0752	0.0225293	Dnmt1	0.245189
1216	4861	P14069	Cortex KI_vs_WT	0.0307732	0.200674	0.880672	S100a6	1
1217	4865	P14094	Cortex KI_vs_WT	0.066626	0.0657	0.33071	Atp1b1	0.789091
1218	4869	P14106	Cortex KI_vs_WT	-0.250586	0.0868	0.0136176	C1qb	0.179202
1219	4873	P14115	Cortex KI_vs_WT	0.232892	0.0811	0.0140123	Rpl27a	0.182642
1220	4877	P14131	Cortex KI_vs_WT	-0.0229047	0.0843	0.790567	Rps16	1
1221	4881	P14148	Cortex KI_vs_WT	-0.040015	0.0696	0.575713	Rpl7	0.909711
1222	4885	P14152	Cortex KI_vs_WT	0.1071	0.0585	0.0919579	Mdh1	0.508498
1223	4889	P14206	Cortex KI_vs_WT	0.0600744	0.0722	0.421881	Rpsa	0.838908
1224	4893	P14211	Cortex KI_vs_WT	0.183251	0.124324	0.166232	Calr	0.63347
1225	4897	P14231	Cortex KI_vs_WT	0.0667523	0.0661	0.332371	Atp1b2	0.789596
1226	4901	P14576	Cortex KI_vs_WT	0.0524667	0.117719	0.663752	Srp54a	0.953347
1227	4905	P14576;E9PXC0	Cortex KI_vs_WT	0.051778	0.0633	0.429091	NA	0.842417
1228	4909	P14602	Cortex KI_vs_WT	-0.024191	0.0824	0.774135	Hspb1	1
1229	4913	P14685	Cortex KI_vs_WT	0.01243	0.0319	0.70366	Psmd3	0.972245
1230	4917	P14733	Cortex KI_vs_WT	0.178296	0.0617	0.0136009	Lmnb1	0.179114
1231	4921	P14824	Cortex KI_vs_WT	-0.0912786	0.0533	0.112227	Anxa6	0.553801
1232	4925	P14869	Cortex KI_vs_WT	0.214446	0.077	0.0164768	Rplp0	0.200973
1233	4929	P14873	Cortex KI_vs_WT	-0.338969	0.107387	0.00827432	Map1b	0.129865
1234	4933	P14901	Cortex KI_vs_WT	0.109208	0.117237	0.369951	Hmox1	0.813874
1235	4937	P15066	Cortex KI_vs_WT	-0.384647	0.203784	0.0835056	Jund	0.487025
1236	4941	P15066;P05627	Cortex KI_vs_WT	-0.424728	0.12166	0.0129657	NA	0.173355
1237	4945	P15105	Cortex KI_vs_WT	0.146589	0.0868	0.116987	Glul	0.560666
1238	4949	P15116	Cortex KI_vs_WT	-0.152717	0.0698	0.0492117	Cdh2	0.374519
1239	4953	P15208	Cortex KI_vs_WT	-0.000799952	0.0542	0.988467	Insr	1
1240	4957	P15209	Cortex KI_vs_WT	-0.0604576	0.0772	0.448833	Ntrk2	0.850876
1241	4961	P15261	Cortex KI_vs_WT	0.0728003	0.101683	0.487719	Ifngr1	0.869399
1242	4965	P15306	Cortex KI_vs_WT	-0.0107842	0.144446	0.942913	Thbd	1
1243	4969	P15307	Cortex KI_vs_WT	0.356693	0.179945	0.0947299	NA	0.515011
1244	4973	P15327	Cortex KI_vs_WT	-0.0498942	0.128568	0.704755	Bpgm	0.972781
1245	4977	P15331	Cortex KI_vs_WT	0.483202	0.218278	0.0469676	NA	0.366812
1246	4981	P15379	Cortex KI_vs_WT	-0.366538	0.164923	0.0462315	Cd44	0.363885
1247	4985	P15388	Cortex KI_vs_WT	0.253677	0.17291	0.168062	Kcnc1	0.635734
1248	4989	P15508	Cortex KI_vs_WT	0.0789246	0.0743	0.308909	NA	0.774273
1249	4993	P15532	Cortex KI_vs_WT	0.274932	0.255641	0.303316	Nme1	0.769919
1250	4997	P15626	Cortex KI_vs_WT	NA	NA	NA	Gstm2	NA
1251	5001	P15655	Cortex KI_vs_WT	0.217733	0.0858	0.0260114	Fgf2	0.26681
1252	5005	P15806	Cortex KI_vs_WT	-0.194713	0.337587	0.574749	Tcf3	0.909093
1253	5009	P15920	Cortex KI_vs_WT	-0.00303242	0.079	0.970023	Atp6v0a2	1
1254	5013	P15947	Cortex KI_vs_WT	0.182492	0.285735	0.535035	Klk1	0.890341
1255	5017	P15948	Cortex KI_vs_WT	0.230655	0.274008	0.416371	Klk1b22	0.836755
1256	5021	P15949	Cortex KI_vs_WT	0.904893	0.57333	0.140478	Klk1b9	0.594913
1257	5025	P16014	Cortex KI_vs_WT	-0.432666	0.227267	0.0811914	Chgb	0.480133
1258	5029	P16015	Cortex KI_vs_WT	-0.670496	0.272718	0.0301171	Car3	0.290364
1259	5033	P16043	Cortex KI_vs_WT	NA	NA	NA	Ghrh	NA
1260	5037	P16045	Cortex KI_vs_WT	0.165831	0.0939	0.102932	Lgals1	0.533249
1261	5041	P16054	Cortex KI_vs_WT	-0.0253733	0.0871	0.775854	Prkce	1
1262	5045	P16092	Cortex KI_vs_WT	0.0439416	0.199323	0.829223	Fgfr1	1
1263	5049	P16110	Cortex KI_vs_WT	NA	NA	NA	NA	NA
1264	5053	P16125	Cortex KI_vs_WT	-0.307216	0.172443	0.100125	Ldhb	0.526543
1265	5057	P16254	Cortex KI_vs_WT	0.0478592	0.125238	0.709036	Srp14	0.974991
1266	5061	P16283	Cortex KI_vs_WT	-0.111387	0.0675	0.124762	Slc4a3	0.573512
1267	5065	P16283;O35936	Cortex KI_vs_WT	NA	NA	NA	NA	NA
1268	5069	P16301	Cortex KI_vs_WT	0.590783	0.228831	0.0240208	Lcat	0.254556
1269	5073	P16330	Cortex KI_vs_WT	0.49156	0.190757	0.0242363	Cnp	0.255744
1270	5077	P16332	Cortex KI_vs_WT	-0.11477	0.10443	0.293323	Mmut	0.76139
1271	5081	P16388	Cortex KI_vs_WT	0.541659	0.174213	0.00903476	Kcna1	0.137234
1272	5085	P16390	Cortex KI_vs_WT	-0.344049	0.298913	0.272152	Kcna3	0.748992
1273	5089	P16406	Cortex KI_vs_WT	0.0646773	0.0788	0.427548	Enpep	0.841804
1274	5093	P16460	Cortex KI_vs_WT	-0.145271	0.123012	0.260498	Ass1	0.737462
1275	5097	P16546	Cortex KI_vs_WT	-0.0751382	0.0292	0.0243499	NA	0.256594
1276	5101	P16627	Cortex KI_vs_WT	0.147571	0.262902	0.584913	Hspa1l	0.913612
1277	5105	P16675	Cortex KI_vs_WT	-0.0504268	0.0973	0.613669	Ctsa	0.927983
1278	5109	P16858	Cortex KI_vs_WT	-0.0594829	0.606726	0.92352	Gapdh	1
1279	5113	P16858;S4R1W1;Q64467	Cortex KI_vs_WT	-0.025821	0.235518	0.914511	NA	1
1280	5117	P16951	Cortex KI_vs_WT	-0.0699104	0.125485	0.587685	Atf2	0.915145
1281	5121	P16951;Q8R0S1	Cortex KI_vs_WT	0.229623	0.129101	0.100623	NA	0.527591
1282	5125	P17012;P23607	Cortex KI_vs_WT	NA	NA	NA	NA	NA
1283	5129	P17047	Cortex KI_vs_WT	0.164144	0.105165	0.144541	Lamp2	0.601218
1284	5133	P17095	Cortex KI_vs_WT	0.0421846	0.183885	0.822416	Hmga1	1
1285	5137	P17156	Cortex KI_vs_WT	-0.407865	0.0879	0.00056909	Hspa2	0.018637
1286	5141	P17182	Cortex KI_vs_WT	-0.109787	0.0578	0.0818143	Eno1	0.482146
1287	5145	P17183	Cortex KI_vs_WT	-0.16511	0.0926	0.0999149	Eno2	0.525851
1288	5149	P17225	Cortex KI_vs_WT	0.237352	0.0894	0.0210377	NA	0.235243
1289	5153	P17426	Cortex KI_vs_WT	0.0237144	0.0642	0.718363	Ap2a1	0.97958
1290	5157	P17427	Cortex KI_vs_WT	-0.112402	0.039	0.0138107	Ap2a2	0.180881
1291	5161	P17439	Cortex KI_vs_WT	0.0147907	0.110931	0.89614	Gba1	1
1292	5165	P17563	Cortex KI_vs_WT	-0.0517738	0.0911	0.580287	Selenbp1	0.910882
1293	5169	P17563;Q63836	Cortex KI_vs_WT	-0.0301726	0.0449	0.514207	NA	0.882355
1294	5173	P17665	Cortex KI_vs_WT	-0.0229725	0.338152	0.946956	Cox7c	1
1295	5177	P17710	Cortex KI_vs_WT	-0.0616389	0.0388	0.137702	Hk1	0.591519
1296	5181	P17742	Cortex KI_vs_WT	-0.112689	0.0523	0.0520225	Ppia	0.38542
1297	5185	P17751	Cortex KI_vs_WT	-0.0246637	0.0397	0.545818	Tpi1	0.895412
1298	5189	P17809	Cortex KI_vs_WT	-0.336488	0.237122	0.181333	Slc2a1	0.654252
1299	5193	P17918	Cortex KI_vs_WT	0.0620052	0.0852	0.480923	Pcna	0.867248
1300	5197	P18052	Cortex KI_vs_WT	0.0179936	0.09	0.844956	Ptpra	1
1301	5201	P18155	Cortex KI_vs_WT	NA	NA	NA	Mthfd2	NA
1302	5205	P18242	Cortex KI_vs_WT	-0.0324606	0.0689	0.646096	Ctsd	0.945009
1303	5209	P18572	Cortex KI_vs_WT	0.394256	0.0622	3.74e-05	Bsg	0.00212859
1304	5213	P18581	Cortex KI_vs_WT	0.0725477	0.173368	0.683002	Slc7a2	0.96143
1305	5217	P18608	Cortex KI_vs_WT	0.101123	0.269158	0.714284	Hmgn1	0.977443
1306	5221	P18653	Cortex KI_vs_WT	0.123388	0.0702	0.10422	Rps6ka1	0.535905
1307	5225	P18654	Cortex KI_vs_WT	-0.0389309	0.0943	0.687057	Rps6ka3	0.96347
1308	5229	P18760	Cortex KI_vs_WT	0.316987	0.256684	0.240491	Cfl1	0.719086
1309	5233	P18826	Cortex KI_vs_WT	0.0226205	0.0707	0.754486	Phka1	0.997551
1310	5237	P18872	Cortex KI_vs_WT	-0.0778391	0.0679	0.273892	Gnao1	0.750271
1311	5241	P19091	Cortex KI_vs_WT	NA	NA	NA	Ar	NA
1312	5245	P19096	Cortex KI_vs_WT	-0.0263806	0.0431	0.552188	Fasn	0.897332
1313	5249	P19137	Cortex KI_vs_WT	-0.153178	0.112876	0.199742	Lama1	0.674286
1314	5253	P19157	Cortex KI_vs_WT	-0.0581985	0.0807	0.484404	Gstp1	0.869065
1315	5257	P19157;P46425	Cortex KI_vs_WT	-0.0667216	0.137228	0.635577	NA	0.939638
1316	5261	P19157;P46425;F6RWR5	Cortex KI_vs_WT	0.479855	0.603167	0.441741	NA	0.847191
1317	5265	P19221	Cortex KI_vs_WT	-0.109799	0.184089	0.561961	F2	0.90282
1318	5269	P19246	Cortex KI_vs_WT	0.561364	0.175501	0.00765197	Nefh	0.123715
1319	5273	P19253	Cortex KI_vs_WT	0.0257553	0.0673	0.708645	Rpl13a	0.974986
1320	5277	P19258	Cortex KI_vs_WT	0.0246469	0.120815	0.841769	Mpv17	1
1321	5281	P19324	Cortex KI_vs_WT	0.115678	0.145535	0.44214	Serpinh1	0.847243
1322	5285	P19426	Cortex KI_vs_WT	-0.164833	0.0848	0.0757213	Nelfe	0.466478
1323	5289	P19536	Cortex KI_vs_WT	-0.150219	0.111242	0.201811	NA	0.675821
1324	5293	P19783	Cortex KI_vs_WT	-0.14261	0.113732	0.233749	Cox4i1	0.71072
1325	5297	P19785	Cortex KI_vs_WT	NA	NA	NA	Esr1	NA
1326	5301	P19973	Cortex KI_vs_WT	NA	NA	NA	Lsp1	NA
1327	5305	P20029	Cortex KI_vs_WT	-0.0788634	0.0503	0.142763	Hspa5	0.597798
1328	5309	P20060	Cortex KI_vs_WT	0.0902194	0.0462	0.0744391	Hexb	0.463677
1329	5313	P20065	Cortex KI_vs_WT	-2.29338	0.91105	0.0270431	Tmsb4x	0.273174
1330	5317	P20108	Cortex KI_vs_WT	0.0836474	0.0625	0.20553	Prdx3	0.680419
1331	5321	P20152	Cortex KI_vs_WT	-0.13149	0.116772	0.282164	Vim	0.755543
1332	5325	P20352	Cortex KI_vs_WT	-0.134511	0.0796	0.116701	F3	0.560001
1333	5329	P20357	Cortex KI_vs_WT	-0.248361	0.0869	0.0143918	Map2	0.185911
1334	5333	P20444	Cortex KI_vs_WT	-0.142974	0.0728	0.0731407	Prkca	0.459349
1335	5337	P20491	Cortex KI_vs_WT	0.0593405	0.173746	0.738606	Fcer1g	0.989713
1336	5341	P20917	Cortex KI_vs_WT	0.633195	0.203267	0.00893601	Mag	0.136402
1337	5345	P20918	Cortex KI_vs_WT	-0.270229	0.169758	0.137403	Plg	0.591034
1338	5349	P20918;CON__P06868	Cortex KI_vs_WT	NA	NA	NA	NA	NA
1339	5353	P21107	Cortex KI_vs_WT	-0.386405	0.210397	0.0911589	Tpm3	0.506658
1340	5357	P21126	Cortex KI_vs_WT	-0.0167226	0.0729	0.822315	Ubl4a	1
1341	5361	P21237	Cortex KI_vs_WT	-0.324476	0.100945	0.00743155	Bdnf	0.12141
1342	5365	P21271	Cortex KI_vs_WT	-0.277079	0.135489	0.0634264	NA	0.427066
1343	5369	P21278	Cortex KI_vs_WT	-0.0930572	0.0428	0.0505468	Gna11	0.380156
1344	5373	P21279	Cortex KI_vs_WT	-0.0736971	0.0769	0.356825	Gnaq	0.805727
1345	5377	P21447	Cortex KI_vs_WT	0.0872734	0.0652	0.205838	Abcb1a	0.680621
1346	5381	P21447;B5X0E4	Cortex KI_vs_WT	NA	NA	NA	NA	NA
1347	5385	P21447;P06795	Cortex KI_vs_WT	0.0526	0.0838	0.5419	NA	0.893327
1348	5389	P21460	Cortex KI_vs_WT	0.0837416	0.074	0.280114	Cst3	0.754194
1349	5393	P21550	Cortex KI_vs_WT	-0.4411	0.276625	0.13679	Eno3	0.590217
1350	5397	P21614	Cortex KI_vs_WT	0.0895649	0.162525	0.591689	Gc	0.916979
1351	5401	P21619	Cortex KI_vs_WT	0.0810536	0.0664	0.245833	Lmnb2	0.723181
1352	5405	P21661	Cortex KI_vs_WT	-0.133255	0.0815	0.127913	Pcsk2	0.578806
1353	5409	P21836	Cortex KI_vs_WT	-0.0627967	0.092	0.508055	Ache	0.879004
1354	5413	P21956	Cortex KI_vs_WT	-0.0968463	0.0831	0.266738	Mfge8	0.74391
1355	5417	P21981	Cortex KI_vs_WT	-0.0756812	0.131195	0.574695	Tgm2	0.909093
1356	5421	P21995	Cortex KI_vs_WT	0.155078	0.10187	0.153838	Emb	0.616038
1357	5425	P22005	Cortex KI_vs_WT	-0.498514	0.336267	0.163988	Penk	0.630488
1358	5429	P22315	Cortex KI_vs_WT	0.0585521	0.0571	0.3253	NA	0.785268
1359	5433	P22366	Cortex KI_vs_WT	-0.160883	0.162944	0.342961	Myd88	0.796572
1360	5437	P22437	Cortex KI_vs_WT	-0.0656658	0.0903	0.481041	Ptgs1	0.867364
1361	5441	P22599	Cortex KI_vs_WT	-0.13256	0.207783	0.535478	Serpina1b	0.890462
1362	5445	P22682	Cortex KI_vs_WT	-0.0704019	0.0674	0.316913	Cbl	0.77994
1363	5449	P22723	Cortex KI_vs_WT	0.209136	0.107652	0.0758871	Gabrg2	0.466937
1364	5453	P22892	Cortex KI_vs_WT	0.099939	0.0659	0.15541	Ap1g1	0.617736
1365	5457	P22892;O88512	Cortex KI_vs_WT	0.070993	0.0971	0.478892	NA	0.866146
1366	5461	P22907	Cortex KI_vs_WT	-0.0457661	0.0789	0.5725	Hmbs	0.908118
1367	5465	P22933	Cortex KI_vs_WT	0.067998	0.148986	0.664154	Gabrd	0.953578
1368	5469	P23116	Cortex KI_vs_WT	-0.0628054	0.0296	0.0554083	Eif3a	0.398243
1369	5473	P23198	Cortex KI_vs_WT	0.0215786	0.0753	0.779386	NA	1
1370	5477	P23242	Cortex KI_vs_WT	-0.000689991	0.089	0.99394	Gja1	1
1371	5481	P23249	Cortex KI_vs_WT	-0.639028	0.296772	0.0523375	Mov10	0.387213
1372	5485	P23475	Cortex KI_vs_WT	0.151175	0.082	0.0899317	Xrcc6	0.503644
1373	5489	P23492	Cortex KI_vs_WT	0.136401	0.125129	0.297084	Pnp	0.765222
1374	5493	P23506	Cortex KI_vs_WT	0.0124943	0.0569	0.829863	NA	1
1375	5497	P23591	Cortex KI_vs_WT	-0.0377279	0.0473	0.441007	Gfus	0.846911
1376	5501	P23780	Cortex KI_vs_WT	0.129602	0.0952	0.198377	Glb1	0.673072
1377	5505	P23780;Q8VC60	Cortex KI_vs_WT	-0.181413	0.187352	0.370288	NA	0.813874
1378	5509	P23798	Cortex KI_vs_WT	-0.0413111	0.163146	0.804387	Pcgf2	1
1379	5513	P23818	Cortex KI_vs_WT	-0.0443662	0.097	0.65557	Gria1	0.94855
1380	5517	P23819	Cortex KI_vs_WT	0.0321394	0.0455	0.493387	Gria2	0.872239
1381	5521	P23927	Cortex KI_vs_WT	0.495306	0.121693	0.00155322	Cryab	0.0396713
1382	5525	P23953	Cortex KI_vs_WT	-0.0931276	0.219444	0.678798	Ces1c	0.959204
1383	5529	P23953;D3Z5G7	Cortex KI_vs_WT	-0.256626	0.26637	0.354351	NA	0.804243
1384	5533	P24063	Cortex KI_vs_WT	0.0992038	0.508042	0.848451	NA	1
1385	5537	P24270	Cortex KI_vs_WT	-0.0644635	0.0754	0.409186	Cat	0.83477
1386	5541	P24288	Cortex KI_vs_WT	0.0964151	0.0693	0.189467	Bcat1	0.662889
1387	5545	P24369	Cortex KI_vs_WT	-0.205997	0.0776	0.0209353	Ppib	0.234643
1388	5549	P24452	Cortex KI_vs_WT	-0.241769	0.163221	0.164318	NA	0.631027
1389	5553	P24472	Cortex KI_vs_WT	-0.151668	0.0723	0.0578836	Gsta4	0.406205
1390	5557	P24472;P30115;P13745;Q6P8Q0	Cortex KI_vs_WT	0.0453133	0.110314	0.688484	NA	0.964386
1391	5561	P24527	Cortex KI_vs_WT	0.044089	0.0482	0.37875	Lta4h	0.818889
1392	5565	P24529	Cortex KI_vs_WT	0.0250058	0.138835	0.860071	Th	1
1393	5569	P24547	Cortex KI_vs_WT	-0.0324183	0.0449	0.484363	Impdh2	0.869065
1394	5573	P24549	Cortex KI_vs_WT	0.272907	0.13855	0.0723921	Aldh1a1	0.456798
1395	5577	P24638	Cortex KI_vs_WT	0.0249528	0.0541	0.652806	Acp2	0.947655
1396	5581	P24668	Cortex KI_vs_WT	-0.0214549	0.0463	0.651181	M6pr	0.947086
1397	5585	P24788	Cortex KI_vs_WT	0.173819	0.0593	0.0126136	Cdk11b	0.170688
1398	5589	P24788;Q64434	Cortex KI_vs_WT	NA	NA	NA	NA	NA
1399	5593	P25233	Cortex KI_vs_WT	-0.361011	0.131448	0.0177194	Ndn	0.210473
1400	5597	P25444	Cortex KI_vs_WT	-0.0136385	0.0842	0.873981	Rps2	1
1401	5601	P25446	Cortex KI_vs_WT	NA	NA	NA	Fas	NA
1402	5605	P25785	Cortex KI_vs_WT	-0.131556	0.236564	0.588354	NA	0.915331
1403	5609	P25799	Cortex KI_vs_WT	-0.126324	0.0948	0.207357	Nfkb1	0.682025
1404	5613	P25911	Cortex KI_vs_WT	0.235562	0.0534	0.00085069	Lyn	0.0253792
1405	5617	P25911;P16277	Cortex KI_vs_WT	0.227	0.148957	0.153438	NA	0.615274
1406	5621	P25976	Cortex KI_vs_WT	0.0457868	0.0637	0.486112	NA	0.869134
1407	5625	P26039	Cortex KI_vs_WT	0.0275049	0.0514	0.602016	Tln1	0.921448
1408	5629	P26040	Cortex KI_vs_WT	0.105568	0.127169	0.422666	Ezr	0.839347
1409	5633	P26041	Cortex KI_vs_WT	0.0492719	0.0778	0.538214	Msn	0.891512
1410	5637	P26043	Cortex KI_vs_WT	-0.0486238	0.0394	0.241164	Rdx	0.719358
1411	5641	P26048	Cortex KI_vs_WT	-0.129879	0.206561	0.541285	Gabra2	0.893023
1412	5645	P26049	Cortex KI_vs_WT	-0.307913	0.134467	0.0409409	Gabra3	0.342144
1413	5649	P26187	Cortex KI_vs_WT	NA	NA	NA	Mgmt	NA
1414	5653	P26231	Cortex KI_vs_WT	0.105299	0.0697	0.156462	Ctnna1	0.618356
1415	5657	P26262	Cortex KI_vs_WT	NA	NA	NA	Klkb1	NA
1416	5661	P26339	Cortex KI_vs_WT	-0.04718	0.166338	0.781522	Chga	1
1417	5665	P26350	Cortex KI_vs_WT	0.100385	0.298184	0.742192	Ptma	0.991631
1418	5669	P26369	Cortex KI_vs_WT	0.26649	0.112459	0.0354235	U2af2	0.317708
1419	5673	P26443	Cortex KI_vs_WT	0.0171453	0.0474	0.724017	Glud1	0.981969
1420	5677	P26450	Cortex KI_vs_WT	0.0661438	0.0521	0.228074	Pik3r1	0.704446
1421	5681	P26516	Cortex KI_vs_WT	-0.0181854	0.0883	0.840197	Psmd7	1
1422	5685	P26618	Cortex KI_vs_WT	-0.120854	0.115008	0.314039	Pdgfra	0.778154
1423	5689	P26638	Cortex KI_vs_WT	0.178822	0.0608	0.0122978	Sars1	0.168448
1424	5693	P26645	Cortex KI_vs_WT	0.137619	0.491952	0.78444	Marcks	1
1425	5697	P26883	Cortex KI_vs_WT	-0.141001	0.10925	0.221145	Fkbp1a	0.697204
1426	5701	P27038	Cortex KI_vs_WT	0.0528279	0.217624	0.812299	Acvr2a	1
1427	5705	P27048;P63163	Cortex KI_vs_WT	0.0927447	0.0837	0.289636	NA	0.758522
1428	5709	P27545	Cortex KI_vs_WT	0.0131615	0.365705	0.971883	Cers1	1
1429	5713	P27546	Cortex KI_vs_WT	0.00492102	0.100023	0.96157	Map4	1
1430	5717	P27600	Cortex KI_vs_WT	0.222131	0.0644	0.00480854	Gna12	0.0914771
1431	5721	P27601	Cortex KI_vs_WT	0.0198682	0.064	0.761645	Gna13	1
1432	5725	P27612	Cortex KI_vs_WT	0.0204936	0.0479	0.676509	Plaa	0.958804
1433	5729	P27641	Cortex KI_vs_WT	-0.0672298	0.140487	0.640862	Xrcc5	0.942591
1434	5733	P27659	Cortex KI_vs_WT	0.11741	0.0684	0.111656	Rpl3	0.552738
1435	5737	P27659;E9PWZ3	Cortex KI_vs_WT	0.0815159	0.162827	0.625687	NA	0.934276
1436	5741	P27661	Cortex KI_vs_WT	NA	NA	NA	H2ax	NA
1437	5745	P27671	Cortex KI_vs_WT	-0.036481	0.0558	0.525916	Rasgrf1	0.886648
1438	5749	P27681	Cortex KI_vs_WT	NA	NA	NA	Gabrg3	NA
1439	5753	P27773	Cortex KI_vs_WT	-0.0250462	0.0509	0.631703	Pdia3	0.937587
1440	5757	P27808	Cortex KI_vs_WT	NA	NA	NA	Mgat1	NA
1441	5761	P28028	Cortex KI_vs_WT	0.0160553	0.0719	0.827149	Braf	1
1442	5765	P28063	Cortex KI_vs_WT	-0.0884248	0.124044	0.489568	Psmb8	0.86988
1443	5769	P28271	Cortex KI_vs_WT	0.082582	0.0611	0.201356	Aco1	0.675247
1444	5773	P28334	Cortex KI_vs_WT	0.150524	0.102643	0.168229	Htr1b	0.635734
1445	5777	P28352	Cortex KI_vs_WT	0.21465	0.089	0.032866	Apex1	0.304739
1446	5781	P28474	Cortex KI_vs_WT	0.113091	0.0741	0.152787	Adh5	0.61409
1447	5785	P28474;Q64437	Cortex KI_vs_WT	0.314801	0.278952	0.281159	NA	0.75473
1448	5789	P28571	Cortex KI_vs_WT	0.0429628	0.0717	0.560445	Slc6a9	0.901946
1449	5793	P28574	Cortex KI_vs_WT	0.0116485	0.101138	0.910212	NA	1
1450	5797	P28650	Cortex KI_vs_WT	0.434793	0.140555	0.00930334	Adss1	0.139746
1451	5801	P28651	Cortex KI_vs_WT	0.086816	0.149241	0.571523	Car8	0.907694
1452	5805	P28652	Cortex KI_vs_WT	-0.097501	0.0737	0.21036	Camk2b	0.685462
1453	5809	P28653	Cortex KI_vs_WT	0.12399	0.257529	0.63885	Bgn	0.941491
1454	5813	P28654	Cortex KI_vs_WT	NA	NA	NA	Dcn	NA
1455	5817	P28656	Cortex KI_vs_WT	-0.230189	0.118787	0.0765319	Nap1l1	0.468219
1456	5821	P28658	Cortex KI_vs_WT	-0.0374994	0.119191	0.758457	Atxn10	1
1457	5825	P28659	Cortex KI_vs_WT	0.113178	0.0605	0.0861787	Celf1	0.493827
1458	5829	P28660	Cortex KI_vs_WT	-0.0692696	0.0277	0.0279374	Nckap1	0.278705
1459	5833	P28661	Cortex KI_vs_WT	0.400447	0.114192	0.00432753	Septin4	0.0855016
1460	5837	P28663	Cortex KI_vs_WT	-0.155634	0.119292	0.216477	Napb	0.69262
1461	5841	P28665	Cortex KI_vs_WT	0.0256979	0.356839	0.943776	Mug1	1
1462	5845	P28665;A0A0N4SVU1	Cortex KI_vs_WT	-0.22229	0.294304	0.464631	NA	0.859747
1463	5849	P28665;P28666	Cortex KI_vs_WT	-0.0357792	0.353403	0.92103	NA	1
1464	5853	P28665;P28666;A0A0N4SVU1	Cortex KI_vs_WT	0.165314	0.424352	0.703682	NA	0.972245
1465	5857	P28667	Cortex KI_vs_WT	-0.468316	0.254249	0.0903181	Marcksl1	0.504467
1466	5861	P28700	Cortex KI_vs_WT	-0.283222	0.311583	0.381256	Rxra	0.819895
1467	5865	P28700;P28705	Cortex KI_vs_WT	NA	NA	NA	NA	NA
1468	5869	P28704	Cortex KI_vs_WT	-0.244294	0.149692	0.12863	Rxrb	0.579732
1469	5873	P28738	Cortex KI_vs_WT	0.0971281	0.0341	0.0147049	Kif5c	0.188336
1470	5877	P28740	Cortex KI_vs_WT	0.000951301	0.0483	0.984616	Kif2a	1
1471	5881	P28740;Q8C0N1	Cortex KI_vs_WT	NA	NA	NA	NA	NA
1472	5885	P28740;Q922S8	Cortex KI_vs_WT	0.00333783	0.0811	0.967838	NA	1
1473	5889	P28741	Cortex KI_vs_WT	-0.00849817	0.0873	0.924097	Kif3a	1
1474	5893	P28741;P33174;E9PX57	Cortex KI_vs_WT	-0.3243	0.11052	0.0125032	NA	0.170158
1475	5897	P28828	Cortex KI_vs_WT	-0.139143	0.0963	0.174026	Ptprm	0.642921
1476	5901	P28843	Cortex KI_vs_WT	-0.0313334	0.243274	0.89965	Dpp4	1
1477	5905	P28867	Cortex KI_vs_WT	0.615422	0.197439	0.00890386	Prkcd	0.136101
1478	5909	P29341	Cortex KI_vs_WT	-0.0152952	0.0699	0.830415	Pabpc1	1
1479	5913	P29341;A2A5N3	Cortex KI_vs_WT	-0.256893	0.220017	0.265643	NA	0.742476
1480	5917	P29341;Q8C7D3	Cortex KI_vs_WT	0.0532394	0.0814	0.525423	NA	0.886499
1481	5921	P29341;Q9D4E6	Cortex KI_vs_WT	-0.0817714	0.104144	0.447574	NA	0.849953
1482	5925	P29351	Cortex KI_vs_WT	0.0770609	0.0696	0.28986	Ptpn6	0.758603
1483	5929	P29387	Cortex KI_vs_WT	-0.0309391	0.0818	0.711733	Gnb4	0.976401
1484	5933	P29391	Cortex KI_vs_WT	0.363911	0.28576	0.226962	NA	0.703031
1485	5937	P29391;P49945	Cortex KI_vs_WT	0.331225	0.317122	0.316853	NA	0.779898
1486	5941	P29416	Cortex KI_vs_WT	0.00139218	0.0745	0.985394	Hexa	1
1487	5945	P29533	Cortex KI_vs_WT	-0.0108524	0.0307	0.729938	NA	0.985823
1488	5949	P29595	Cortex KI_vs_WT	-1.53527	0.793066	0.076795	Nedd8	0.468744
1489	5953	P29699	Cortex KI_vs_WT	-0.191027	0.192925	0.34164	Ahsg	0.796008
1490	5957	P29758	Cortex KI_vs_WT	0.043394	0.0479	0.382741	Oat	0.820376
1491	5961	P29788	Cortex KI_vs_WT	-0.15934	0.176205	0.383638	Vtn	0.82123
1492	5965	P30051	Cortex KI_vs_WT	NA	NA	NA	Tead1	NA
1493	5969	P30051;P70210;Q62296	Cortex KI_vs_WT	1.2628	0.73475	0.111339	NA	0.551696
1494	5973	P30275	Cortex KI_vs_WT	0.0985921	0.0407	0.0322157	Ckmt1	0.302085
1495	5977	P30285	Cortex KI_vs_WT	0.0461318	0.209649	0.829537	Cdk4	1
1496	5981	P30416	Cortex KI_vs_WT	0.275632	0.105792	0.0229959	Fkbp4	0.248135
1497	5985	P30548	Cortex KI_vs_WT	NA	NA	NA	Tacr1	NA
1498	5989	P30677	Cortex KI_vs_WT	-0.126102	0.394786	0.754901	Gna14	0.997872
1499	5993	P30681	Cortex KI_vs_WT	0.324619	0.21793	0.162147	Hmgb2	0.627889
1500	5997	P30999	Cortex KI_vs_WT	0.0581726	0.0707	0.42639	Ctnnd1	0.841097
1501	6001	P31001	Cortex KI_vs_WT	-0.0487657	0.103823	0.646989	Des	0.945409
1502	6005	P31230	Cortex KI_vs_WT	-0.114556	0.0413	0.0168035	NA	0.203595
1503	6009	P31254	Cortex KI_vs_WT	-0.30131	0.328037	0.393771	NA	0.826245
1504	6013	P31266	Cortex KI_vs_WT	NA	NA	NA	Rbpj	NA
1505	6017	P31324	Cortex KI_vs_WT	-0.115189	0.0405	0.0148472	Prkar2b	0.189339
1506	6021	P31360;P31361;P21952	Cortex KI_vs_WT	0.616641	0.216102	0.0145286	NA	0.186938
1507	6025	P31360;P31361;P62515	Cortex KI_vs_WT	NA	NA	NA	NA	NA
1508	6029	P31532	Cortex KI_vs_WT	NA	NA	NA	Saa4	NA
1509	6033	P31648	Cortex KI_vs_WT	0.124099	0.188792	0.523373	Slc6a1	0.885802
1510	6037	P31649	Cortex KI_vs_WT	-0.200853	0.262139	0.47261	Slc6a13	0.863342
1511	6041	P31650	Cortex KI_vs_WT	0.0189968	0.110336	0.866172	Slc6a11	1
1512	6045	P31750	Cortex KI_vs_WT	-0.158415	0.111662	0.181435	Akt1	0.654354
1513	6049	P31786	Cortex KI_vs_WT	-0.518889	0.150221	0.00476814	Dbi	0.0908531
1514	6053	P31938	Cortex KI_vs_WT	-0.233436	0.0638	0.00327505	Map2k1	0.0695755
1515	6057	P31996	Cortex KI_vs_WT	0.164845	0.11173	0.19056	Cd68	0.663615
1516	6061	P32020	Cortex KI_vs_WT	0.0593773	0.0524	0.279566	Scp2	0.753999
1517	6065	P32037	Cortex KI_vs_WT	-0.0889125	0.0827	0.303239	Slc2a3	0.769919
1518	6069	P32067	Cortex KI_vs_WT	0.414735	0.181573	0.0413684	Ssb	0.343475
1519	6073	P32114	Cortex KI_vs_WT	0.239699	0.185757	0.221226	Pax2	0.697298
1520	6077	P32211	Cortex KI_vs_WT	0.522233	0.237472	0.0482114	Chrm4	0.371558
1521	6081	P32233	Cortex KI_vs_WT	-0.0508824	0.0529	0.355205	Drg1	0.804923
1522	6085	P32261	Cortex KI_vs_WT	-0.0696521	0.213211	0.749536	Serpinc1	0.995189
1523	6089	P32261;CON__P41361	Cortex KI_vs_WT	0.0352743	0.215212	0.872534	NA	1
1524	6093	P32507	Cortex KI_vs_WT	-0.0490886	0.101508	0.63738	Nectin2	0.940784
1525	6097	P32648	Cortex KI_vs_WT	0.212976	0.158327	0.203444	Vip	0.678104
1526	6101	P32848	Cortex KI_vs_WT	1.11218	0.276738	0.00170283	Pvalb	0.0425235
1527	6105	P32883	Cortex KI_vs_WT	-0.0577285	0.105177	0.593161	Kras	0.917831
1528	6109	P32921	Cortex KI_vs_WT	-0.0537402	0.0775	0.501487	Wars1	0.875944
1529	6113	P33173	Cortex KI_vs_WT	-0.0172188	0.0448	0.707473	NA	0.974232
1530	6117	P33175	Cortex KI_vs_WT	-0.0110933	0.0293	0.711983	Kif5a	0.976413
1531	6121	P33622	Cortex KI_vs_WT	0.00827272	0.264622	0.975574	Apoc3	1
1532	6125	P34022	Cortex KI_vs_WT	-0.0721619	0.0795	0.381666	Ranbp1	0.819895
1533	6129	P34152	Cortex KI_vs_WT	0.129504	0.0436	0.0117083	Ptk2	0.162863
1534	6133	P34884	Cortex KI_vs_WT	-0.176643	0.0963	0.0915529	Mif	0.507273
1535	6137	P34914	Cortex KI_vs_WT	-0.0816394	0.0288	0.01514	Ephx2	0.191102
1536	6141	P34928	Cortex KI_vs_WT	1.05016	0.486342	0.0517757	Apoc1	0.384719
1537	6145	P35123	Cortex KI_vs_WT	0.158933	0.059	0.0194921	Usp4	0.224363
1538	6149	P35235	Cortex KI_vs_WT	-0.0156345	0.0336	0.650429	Ptpn11	0.946904
1539	6153	P35278	Cortex KI_vs_WT	0.0269741	0.123346	0.83057	Rab5c	1
1540	6157	P35279	Cortex KI_vs_WT	0.147716	0.0387	0.00245187	Rab6a	0.0561814
1541	6161	P35282	Cortex KI_vs_WT	-0.087361	0.059	0.164532	Rab21	0.631363
1542	6165	P35283	Cortex KI_vs_WT	-0.00733484	0.0579	0.901249	Rab12	1
1543	6169	P35285	Cortex KI_vs_WT	0.00865896	0.0818	0.917396	Rab22a	1
1544	6173	P35288	Cortex KI_vs_WT	0.244727	0.241144	0.330199	NA	0.788732
1545	6177	P35290	Cortex KI_vs_WT	0.00440396	0.0658	0.94777	Rab24	1
1546	6181	P35293	Cortex KI_vs_WT	0.119558	0.0808	0.1646	Rab18	0.631363
1547	6185	P35330	Cortex KI_vs_WT	0.18517	0.12111	0.177148	Icam2	0.647885
1548	6189	P35347	Cortex KI_vs_WT	0.0926836	0.214816	0.673787	Crhr1	0.957852
1549	6193	P35436	Cortex KI_vs_WT	0.168586	0.101519	0.12267	Grin2a	0.570771
1550	6197	P35438	Cortex KI_vs_WT	-0.0874578	0.0422	0.0606776	Grin1	0.417159
1551	6201	P35441	Cortex KI_vs_WT	-0.102944	0.207872	0.629383	NA	0.936579
1552	6205	P35441;CON__Q28194	Cortex KI_vs_WT	NA	NA	NA	NA	NA
1553	6209	P35454	Cortex KI_vs_WT	-0.30141	0.334668	0.385507	Oxt	0.821388
1554	6213	P35455	Cortex KI_vs_WT	-0.437548	0.262165	0.120981	Avp	0.567184
1555	6217	P35486	Cortex KI_vs_WT	0.0584591	0.0634	0.374716	Pdha1	0.816609
1556	6221	P35486;P35487	Cortex KI_vs_WT	-1.61002	1.1639	0.215843	NA	0.691887
1557	6225	P35505	Cortex KI_vs_WT	-0.000579116	0.0941	0.995191	Fah	1
1558	6229	P35546	Cortex KI_vs_WT	NA	NA	NA	Ret	NA
1559	6233	P35550	Cortex KI_vs_WT	0.0533447	0.0806	0.520721	Fbl	0.88523
1560	6237	P35564	Cortex KI_vs_WT	0.238556	0.18856	0.229835	Canx	0.705563
1561	6241	P35569	Cortex KI_vs_WT	0.317591	0.247018	0.222804	Irs1	0.698651
1562	6245	P35585	Cortex KI_vs_WT	0.100681	0.0553	0.0934256	Ap1m1	0.512662
1563	6249	P35585;Q9WVP1	Cortex KI_vs_WT	0.172221	0.082	0.0575607	NA	0.404839
1564	6253	P35601	Cortex KI_vs_WT	0.878885	0.617745	0.204661	Rfc1	0.679111
1565	6257	P35700	Cortex KI_vs_WT	-0.0120141	0.0444	0.791432	Prdx1	1
1566	6261	P35762	Cortex KI_vs_WT	0.233198	0.140615	0.123124	Cd81	0.571388
1567	6265	P35802	Cortex KI_vs_WT	-0.169296	0.150505	0.282649	Gpm6a	0.755948
1568	6269	P35803	Cortex KI_vs_WT	0.00953007	0.0861	0.913676	Gpm6b	1
1569	6273	P35821	Cortex KI_vs_WT	0.0278865	0.061	0.655873	Ptpn1	0.94855
1570	6277	P35822	Cortex KI_vs_WT	0.0707664	0.0568	0.236955	Ptprk	0.714652
1571	6281	P35831	Cortex KI_vs_WT	-0.0587687	0.0521	0.281161	Ptpn12	0.75473
1572	6285	P35922	Cortex KI_vs_WT	0.138379	0.0952	0.171661	NA	0.639758
1573	6289	P35951	Cortex KI_vs_WT	-0.0570739	0.0987	0.573941	Ldlr	0.908697
1574	6293	P35979	Cortex KI_vs_WT	-0.115512	0.112486	0.324722	Rpl12	0.78518
1575	6297	P35980	Cortex KI_vs_WT	0.0120584	0.0613	0.847375	Rpl18	1
1576	6301	P36371	Cortex KI_vs_WT	NA	NA	NA	Tap2	NA
1577	6305	P36536	Cortex KI_vs_WT	-0.143435	0.350045	0.689201	NA	0.964577
1578	6309	P36552	Cortex KI_vs_WT	0.248004	0.0719	0.00481633	Cpox	0.0915767
1579	6313	P36895	Cortex KI_vs_WT	0.107241	0.239627	0.663177	Bmpr1a	0.953053
1580	6317	P36898	Cortex KI_vs_WT	NA	NA	NA	Bmpr1b	NA
1581	6321	P36916	Cortex KI_vs_WT	0.00381485	0.0344	0.91346	Gnl1	1
1582	6325	P36993	Cortex KI_vs_WT	-0.0961143	0.111223	0.404443	Ppm1b	0.831785
1583	6329	P37040	Cortex KI_vs_WT	-0.0783276	0.0276	0.0150354	Por	0.190519
1584	6333	P37172	Cortex KI_vs_WT	0.184079	0.099	0.0876096	Acvr1	0.497747
1585	6337	P37804	Cortex KI_vs_WT	0.369436	0.291403	0.228922	Tagln	0.705285
1586	6341	P38060	Cortex KI_vs_WT	-0.0457983	0.101531	0.659976	Hmgcl	0.951197
1587	6345	P38532	Cortex KI_vs_WT	0.350818	0.103571	0.00539555	Hsf1	0.098969
1588	6349	P38585	Cortex KI_vs_WT	0.164063	0.122275	0.204514	Ttl	0.678964
1589	6353	P38647	Cortex KI_vs_WT	0.16988	0.0774	0.0485181	Hspa9	0.372475
1590	6357	P39038	Cortex KI_vs_WT	-0.460533	0.059	4.87e-06	Cdh4	0.000414402
1591	6361	P39053	Cortex KI_vs_WT	0.0235608	0.0606	0.704454	Dnm1	0.972776
1592	6365	P39054	Cortex KI_vs_WT	0.0510852	0.055	0.371537	Dnm2	0.814732
1593	6369	P39061	Cortex KI_vs_WT	0.0988842	0.213793	0.651981	Col18a1	0.947342
1594	6373	P39087	Cortex KI_vs_WT	-0.0268604	0.0544	0.630324	NA	0.937185
1595	6377	P39098	Cortex KI_vs_WT	-0.334602	0.14127	0.0354962	Man1a2	0.318144
1596	6381	P39429	Cortex KI_vs_WT	0.209987	0.179818	0.265576	Traf2	0.742404
1597	6385	P39447	Cortex KI_vs_WT	0.0517816	0.0539	0.355943	Tjp1	0.805306
1598	6389	P39688	Cortex KI_vs_WT	0.030822	0.0675	0.655956	Fyn	0.94855
1599	6393	P39688;P14234	Cortex KI_vs_WT	0.217088	0.287768	0.465165	NA	0.860021
1600	6397	P39749	Cortex KI_vs_WT	0.0607052	0.0919	0.521572	NA	0.885503
1601	6401	P39876	Cortex KI_vs_WT	-0.100682	0.13604	0.487182	Timp3	0.869399
1602	6405	P40124	Cortex KI_vs_WT	0.0303781	0.047	0.530046	Cap1	0.88824
1603	6409	P40142	Cortex KI_vs_WT	0.0353499	0.0314	0.282	Tkt	0.755543
1604	6413	P40224	Cortex KI_vs_WT	NA	NA	NA	Cxcl12	NA
1605	6417	P40237	Cortex KI_vs_WT	0.515573	0.162308	0.00797272	Cd82	0.126898
1606	6421	P40240	Cortex KI_vs_WT	-0.444869	0.488108	0.380021	Cd9	0.819616
1607	6425	P40336	Cortex KI_vs_WT	0.096364	0.0811	0.257457	Vps26a	0.734772
1608	6429	P40338	Cortex KI_vs_WT	-0.0450804	0.119029	0.7115	Vhl	0.97627
1609	6433	P40630	Cortex KI_vs_WT	0.0232374	0.0572	0.691624	Tfam	0.966008
1610	6437	P40694	Cortex KI_vs_WT	0.0203105	0.162963	0.902878	NA	1
1611	6441	P40749	Cortex KI_vs_WT	0.209002	0.104135	0.0678125	Syt4	0.442365
1612	6445	P40936	Cortex KI_vs_WT	0.608539	0.26382	0.0397165	Inmt	0.336954
1613	6449	P41105	Cortex KI_vs_WT	0.00497734	0.07	0.944492	Rpl28	1
1614	6453	P41216	Cortex KI_vs_WT	0.0873846	0.0593	0.166488	Acsl1	0.633558
1615	6457	P41233	Cortex KI_vs_WT	-0.0174805	0.0822	0.83516	Abca1	1
1616	6461	P41234	Cortex KI_vs_WT	0.0195662	0.0761	0.801538	NA	1
1617	6465	P41241	Cortex KI_vs_WT	-0.121112	0.0546	0.046435	Csk	0.364299
1618	6469	P41242	Cortex KI_vs_WT	-0.00547813	0.0455	0.906178	Matk	1
1619	6473	P41317	Cortex KI_vs_WT	-0.0915454	0.158923	0.575234	Mbl2	0.909439
1620	6477	P41438	Cortex KI_vs_WT	0.420005	0.46636	0.385517	Slc19a1	0.821388
1621	6481	P41539	Cortex KI_vs_WT	-0.290702	0.184394	0.140888	Tac1	0.595085
1622	6485	P41588	Cortex KI_vs_WT	NA	NA	NA	Vipr2	NA
1623	6489	P41731	Cortex KI_vs_WT	0.302798	0.26451	0.274633	Cd63	0.750625
1624	6493	P41778	Cortex KI_vs_WT	0.146571	0.349506	0.682359	Pbx1	0.961124
1625	6497	P41778;O35984	Cortex KI_vs_WT	NA	NA	NA	NA	NA
1626	6501	P41969	Cortex KI_vs_WT	-0.591379	0.374881	0.140662	Elk1	0.594913
1627	6505	P42125	Cortex KI_vs_WT	0.00753626	0.0691	0.914948	Eci1	1
1628	6509	P42128	Cortex KI_vs_WT	0.0363489	0.0737	0.630825	Foxk1	0.937202
1629	6513	P42208	Cortex KI_vs_WT	-0.112328	0.0475	0.0356322	Septin2	0.318366
1630	6517	P42225	Cortex KI_vs_WT	-0.0582515	0.0713	0.429597	NA	0.842517
1631	6521	P42227	Cortex KI_vs_WT	-0.0854737	0.0513	0.121692	Stat3	0.568361
1632	6525	P42230	Cortex KI_vs_WT	NA	NA	NA	Stat5a	NA
1633	6529	P42232	Cortex KI_vs_WT	0.0727774	0.136346	0.603248	Stat5b	0.921991
1634	6533	P42337	Cortex KI_vs_WT	0.180261	0.094	0.0792941	Pik3ca	0.476011
1635	6537	P42567	Cortex KI_vs_WT	0.201992	0.154907	0.216706	Eps15	0.692858
1636	6541	P42669	Cortex KI_vs_WT	-0.223672	0.141877	0.140889	Pura	0.595085
1637	6545	P42703	Cortex KI_vs_WT	-0.00955001	0.114207	0.934737	Lifr	1
1638	6549	P42859	Cortex KI_vs_WT	0.0915221	0.0497	0.0902732	NA	0.504467
1639	6553	P42866	Cortex KI_vs_WT	-0.836008	0.250243	0.00864933	Oprm1	0.133923
1640	6557	P42867	Cortex KI_vs_WT	0.293301	0.851077	0.736342	Dpagt1	0.988868
1641	6561	P42925	Cortex KI_vs_WT	-0.0905481	0.276544	0.748986	Pxmp2	0.995097
1642	6565	P42932	Cortex KI_vs_WT	-0.113378	0.0453	0.0276657	Cct8	0.27712
1643	6569	P43006	Cortex KI_vs_WT	-0.00911224	0.0846	0.915972	Slc1a2	1
1644	6573	P43024	Cortex KI_vs_WT	-0.124116	0.168219	0.474802	Cox6a1	0.864611
1645	6577	P43135;Q60632	Cortex KI_vs_WT	-0.0807373	0.0755	0.306122	NA	0.772166
1646	6581	P43136	Cortex KI_vs_WT	NA	NA	NA	Nr2f6	NA
1647	6585	P43247	Cortex KI_vs_WT	0.0379958	0.0901	0.680538	Msh2	0.960375
1648	6589	P43274	Cortex KI_vs_WT	0.338408	0.086	0.00198499	H1f4	0.0479338
1649	6593	P43275	Cortex KI_vs_WT	0.0134948	0.113292	0.907155	H1f1	1
1650	6597	P43276	Cortex KI_vs_WT	0.296637	0.125684	0.0360392	H1f5	0.320288
1651	6601	P43277	Cortex KI_vs_WT	0.266985	0.148035	0.0964523	H1f3	0.518895
1652	6605	P43300	Cortex KI_vs_WT	0.103399	0.128043	0.450179	Egr3	0.851806
1653	6609	P43346	Cortex KI_vs_WT	NA	NA	NA	Dck	NA
1654	6613	P43406	Cortex KI_vs_WT	0.0192613	0.0403	0.640931	Itgav	0.942638
1655	6617	P43407	Cortex KI_vs_WT	-0.259397	0.35628	0.480536	Sdc2	0.86719
1656	6621	P45376	Cortex KI_vs_WT	0.0506821	0.0494	0.325142	Akr1b1	0.78525
1657	6625	P45481	Cortex KI_vs_WT	0.289427	0.149649	0.0770381	NA	0.469109
1658	6629	P45591	Cortex KI_vs_WT	0.10777	0.0757	0.180088	Cfl2	0.652508
1659	6633	P45878	Cortex KI_vs_WT	0.173816	0.121648	0.178559	Fkbp2	0.649711
1660	6637	P45952	Cortex KI_vs_WT	-0.122158	0.0456	0.020001	Acadm	0.227323
1661	6641	P46061	Cortex KI_vs_WT	-0.0106838	0.0486	0.829692	Rangap1	1
1662	6645	P46096	Cortex KI_vs_WT	0.178753	0.174104	0.324811	Syt1	0.785198
1663	6649	P46097	Cortex KI_vs_WT	0.695881	0.195909	0.00398148	Syt2	0.08071
1664	6653	P46412	Cortex KI_vs_WT	-0.0842907	0.0848	0.339703	Gpx3	0.794842
1665	6657	P46412;P21765	Cortex KI_vs_WT	NA	NA	NA	NA	NA
1666	6661	P46414	Cortex KI_vs_WT	0.184678	0.102494	0.0967307	Cdkn1b	0.519155
1667	6665	P46460	Cortex KI_vs_WT	-0.0157489	0.0487	0.751929	Nsf	0.996519
1668	6669	P46467	Cortex KI_vs_WT	-0.135015	0.0571	0.0356881	Vps4b	0.318431
1669	6673	P46471	Cortex KI_vs_WT	0.0541184	0.0273	0.0708701	NA	0.451725
1670	6677	P46638	Cortex KI_vs_WT	0.0299439	0.0684	0.669431	Rab11b	0.955993
1671	6681	P46656	Cortex KI_vs_WT	0.0428561	0.0479	0.388492	Fdx1	0.823462
1672	6685	P46660	Cortex KI_vs_WT	0.288712	0.19788	0.170233	Ina	0.638296
1673	6689	P46662	Cortex KI_vs_WT	-0.0584655	0.0635	0.375407	Nf2	0.81717
1674	6693	P46664	Cortex KI_vs_WT	0.14854	0.0529	0.0158012	Adss2	0.195727
1675	6697	P46718	Cortex KI_vs_WT	-0.114772	0.161689	0.491374	Pdcd2	0.870994
1676	6701	P46735	Cortex KI_vs_WT	-0.128594	0.119707	0.303841	Myo1b	0.769984
1677	6705	P46735;Q9D6A1	Cortex KI_vs_WT	0.452809	0.497098	0.397463	NA	0.828018
1678	6709	P46737	Cortex KI_vs_WT	-0.00476114	0.0734	0.949335	Brcc3	1
1679	6713	P46737;Q7M757	Cortex KI_vs_WT	-0.210925	0.129482	0.129268	NA	0.579932
1680	6717	P46935	Cortex KI_vs_WT	-0.019107	0.0469	0.690758	Nedd4	0.965388
1681	6721	P46938	Cortex KI_vs_WT	0.667946	0.282692	0.0358681	Yap1	0.31956
1682	6725	P46978	Cortex KI_vs_WT	0.0740084	0.116093	0.535778	Stt3a	0.890605
1683	6729	P47199	Cortex KI_vs_WT	-0.221106	0.0669	0.00627509	Cryz	0.10948
1684	6733	P47212	Cortex KI_vs_WT	0.105653	0.13724	0.456282	Gal	0.855426
1685	6737	P47708	Cortex KI_vs_WT	0.139559	0.0761	0.0915692	Rph3a	0.507273
1686	6741	P47738	Cortex KI_vs_WT	0.0453642	0.0802	0.582169	Aldh2	0.911999
1687	6745	P47740	Cortex KI_vs_WT	-0.0491752	0.0293	0.119163	Aldh3a2	0.56367
1688	6749	P47740;P47739	Cortex KI_vs_WT	-0.010568	0.127775	0.935447	NA	1
1689	6753	P47743	Cortex KI_vs_WT	-0.111362	0.099	0.282712	Grm8	0.755951
1690	6757	P47746	Cortex KI_vs_WT	0.112021	0.240446	0.649638	Cnr1	0.946531
1691	6761	P47753	Cortex KI_vs_WT	-0.0888388	0.0838	0.310118	NA	0.77476
1692	6765	P47754	Cortex KI_vs_WT	0.114063	0.0636	0.097944	Capza2	0.521496
1693	6769	P47757	Cortex KI_vs_WT	-0.0173036	0.0576	0.768816	Capzb	1
1694	6773	P47758	Cortex KI_vs_WT	-0.0680212	0.0624	0.296784	Srprb	0.765059
1695	6777	P47791	Cortex KI_vs_WT	0.0112941	0.069	0.872668	Gsr	1
1696	6781	P47802	Cortex KI_vs_WT	0.0772812	0.0747	0.321381	NA	0.783143
1697	6785	P47809	Cortex KI_vs_WT	-0.0181068	0.0399	0.657949	Map2k4	0.949756
1698	6789	P47811	Cortex KI_vs_WT	0.0941821	0.0723	0.21699	Mapk14	0.693024
1699	6793	P47856	Cortex KI_vs_WT	-0.0278933	0.0824	0.740722	Gfpt1	0.990502
1700	6797	P47856;Q9Z2Z9	Cortex KI_vs_WT	-0.0922237	0.0549	0.118832	NA	0.563071
1701	6801	P47857	Cortex KI_vs_WT	0.0879076	0.0449	0.0738172	Pfkm	0.461647
1702	6805	P47867	Cortex KI_vs_WT	-0.0794242	0.125121	0.537487	Scg3	0.891341
1703	6809	P47879	Cortex KI_vs_WT	0.241999	0.125387	0.101842	Igfbp4	0.530189
1704	6813	P47911	Cortex KI_vs_WT	-0.0109382	0.0733	0.883825	Rpl6	1
1705	6817	P47915	Cortex KI_vs_WT	-0.325324	0.338209	0.355083	Rpl29	0.804884
1706	6821	P47915;W4VSN7	Cortex KI_vs_WT	-1.6615	1.3687	0.270384	NA	0.74738
1707	6825	P47934	Cortex KI_vs_WT	0.0178331	0.0517	0.736239	Crat	0.988857
1708	6829	P47941	Cortex KI_vs_WT	-0.056246	0.0633	0.391894	Crkl	0.824728
1709	6833	P47955	Cortex KI_vs_WT	NA	NA	NA	Rplp1	NA
1710	6837	P47962	Cortex KI_vs_WT	0.0434902	0.0589	0.474216	Rpl5	0.864207
1711	6841	P47963	Cortex KI_vs_WT	-0.0505722	0.066	0.458392	Rpl13	0.85609
1712	6845	P47964	Cortex KI_vs_WT	-0.0732198	0.0907	0.435054	NA	0.844731
1713	6849	P47968	Cortex KI_vs_WT	0.129972	0.187737	0.501921	Rpia	0.876091
1714	6853	P48024;Q9CXU9	Cortex KI_vs_WT	0.214325	0.164606	0.217339	NA	0.693581
1715	6857	P48025	Cortex KI_vs_WT	-0.900754	0.771328	0.28719	Syk	0.758522
1716	6861	P48036	Cortex KI_vs_WT	0.192989	0.107112	0.0967435	Anxa5	0.519155
1717	6865	P48168	Cortex KI_vs_WT	-0.267217	0.140226	0.0809337	Glrb	0.479399
1718	6869	P48193	Cortex KI_vs_WT	0.0611099	0.109148	0.585861	Epb41	0.914308
1719	6873	P48302	Cortex KI_vs_WT	-0.0862781	0.127497	0.511425	Ednrb	0.880961
1720	6877	P48318	Cortex KI_vs_WT	0.272086	0.105268	0.0238907	Gad1	0.253601
1721	6881	P48320	Cortex KI_vs_WT	0.0304683	0.0948	0.753502	Gad2	0.997079
1722	6885	P48377	Cortex KI_vs_WT	-0.212138	0.148715	0.179226	Rfx1	0.650841
1723	6889	P48381	Cortex KI_vs_WT	-0.247663	0.163373	0.155427	Rfx3	0.617736
1724	6893	P48410	Cortex KI_vs_WT	-0.303004	0.163374	0.0883687	Abcd1	0.49937
1725	6897	P48428	Cortex KI_vs_WT	-0.176954	0.112315	0.141118	Tbca	0.595564
1726	6901	P48432	Cortex KI_vs_WT	NA	NA	NA	Sox2	NA
1727	6905	P48432;P53783;Q811W0	Cortex KI_vs_WT	0.2627	0.366703	0.487462	NA	0.869399
1728	6909	P48432;P53783;Q811W0;Q04892	Cortex KI_vs_WT	NA	NA	NA	NA	NA
1729	6913	P48441	Cortex KI_vs_WT	0.138671	0.195413	0.491493	NA	0.871097
1730	6917	P48453	Cortex KI_vs_WT	-0.0794944	0.0314	0.0263373	Ppp3cb	0.269035
1731	6921	P48455	Cortex KI_vs_WT	-0.0817017	0.107211	0.46074	Ppp3cc	0.857393
1732	6925	P48542	Cortex KI_vs_WT	0.219759	0.157527	0.188282	Kcnj6	0.661552
1733	6929	P48542;P48545	Cortex KI_vs_WT	0.170549	0.252515	0.524583	NA	0.886003
1734	6933	P48543	Cortex KI_vs_WT	0.311056	0.215227	0.173992	Kcnj9	0.642902
1735	6937	P48678	Cortex KI_vs_WT	0.175497	0.0725	0.0323686	Lmna	0.302823
1736	6941	P48722	Cortex KI_vs_WT	0.148808	0.0429	0.00463085	Hspa4l	0.0889936
1737	6945	P48725	Cortex KI_vs_WT	0.245821	0.243043	0.350847	Pcnt	0.801413
1738	6949	P48758	Cortex KI_vs_WT	-0.216076	0.0501	0.00101115	Cbr1	0.0287658
1739	6953	P48771	Cortex KI_vs_WT	0.111436	0.116219	0.356555	Cox7a2	0.805608
1740	6957	P48774	Cortex KI_vs_WT	0.0338658	0.0849	0.697143	Gstm5	0.968883
1741	6961	P48962	Cortex KI_vs_WT	0.023258	0.0806	0.777941	Slc25a4	1
1742	6965	P49025	Cortex KI_vs_WT	0.122118	0.038	0.00747044	Cit	0.121768
1743	6969	P49070	Cortex KI_vs_WT	-0.290361	0.127834	0.042331	Caml	0.347366
1744	6973	P49117	Cortex KI_vs_WT	-0.0826463	0.0771	0.304972	Nr2c2	0.771084
1745	6977	P49135	Cortex KI_vs_WT	0.349097	0.114349	0.0224278	Ercc3	0.244531
1746	6981	P49138	Cortex KI_vs_WT	0.0443968	0.0771	0.575334	Mapkapk2	0.909477
1747	6985	P49138;Q3UMW7	Cortex KI_vs_WT	NA	NA	NA	NA	NA
1748	6989	P49138;Q3UMW7;Q9D2E1;Q922R0	Cortex KI_vs_WT	NA	NA	NA	NA	NA
1749	6993	P49182	Cortex KI_vs_WT	0.188727	0.226343	0.420675	Serpind1	0.838505
1750	6997	P49222	Cortex KI_vs_WT	-0.2254	0.164478	0.195655	Epb42	0.669807
1751	7001	P49312	Cortex KI_vs_WT	0.259256	0.147131	0.103484	Hnrnpa1	0.534386
1752	7005	P49442	Cortex KI_vs_WT	-0.0191701	0.0521	0.719339	Inpp1	0.979944
1753	7009	P49443	Cortex KI_vs_WT	0.041176	0.0453	0.381701	Ppm1a	0.819895
1754	7013	P49446	Cortex KI_vs_WT	NA	NA	NA	Ptpre	NA
1755	7017	P49586	Cortex KI_vs_WT	0.147855	0.11299	0.215188	Pcyt1a	0.690588
1756	7021	P49615	Cortex KI_vs_WT	0.267368	0.0945	0.0152001	Cdk5	0.191591
1757	7025	P49710	Cortex KI_vs_WT	-0.113308	0.0777	0.170451	Hcls1	0.638331
1758	7029	P49722	Cortex KI_vs_WT	0.0177588	0.0557	0.755231	Psma2	0.998018
1759	7033	P49769	Cortex KI_vs_WT	0.0654762	0.197969	0.746545	NA	0.993645
1760	7037	P49813	Cortex KI_vs_WT	0.0445353	0.0765	0.571301	Tmod1	0.907648
1761	7041	P49813;Q9JLH8	Cortex KI_vs_WT	0.0345427	0.108047	0.760034	NA	1
1762	7045	P49817	Cortex KI_vs_WT	-0.144684	0.226847	0.535582	Cav1	0.890475
1763	7049	P49817;P51637	Cortex KI_vs_WT	-0.117599	0.214249	0.593147	NA	0.917831
1764	7053	P49962	Cortex KI_vs_WT	0.0290051	0.144297	0.844057	Srp9	1
1765	7057	P50096	Cortex KI_vs_WT	-0.126174	0.0799	0.140078	Impdh1	0.594742
1766	7061	P50114	Cortex KI_vs_WT	-0.0423048	0.196877	0.83347	S100b	1
1767	7065	P50136	Cortex KI_vs_WT	-0.0230724	0.0586	0.700869	NA	0.970822
1768	7069	P50153	Cortex KI_vs_WT	-0.0542837	0.253372	0.833953	Gng4	1
1769	7073	P50171	Cortex KI_vs_WT	-0.13593	0.0643	0.0560468	Hsd17b8	0.400286
1770	7077	P50172	Cortex KI_vs_WT	0.59464	0.167506	0.00399684	Hsd11b1	0.0809298
1771	7081	P50247	Cortex KI_vs_WT	0.0545126	0.0543	0.335258	Ahcyl	0.791208
1772	7085	P50285	Cortex KI_vs_WT	-0.135935	0.11093	0.243927	Fmo1	0.721016
1773	7089	P50294	Cortex KI_vs_WT	-0.0785403	0.15934	0.630971	Nat1	0.937238
1774	7093	P50295	Cortex KI_vs_WT	-0.344828	0.304802	0.280024	Nat2	0.754194
1775	7097	P50396	Cortex KI_vs_WT	-0.0958336	0.0486	0.0722835	Gdi1	0.456353
1776	7101	P50427	Cortex KI_vs_WT	0.0950422	0.0928	0.325996	Sts	0.785584
1777	7105	P50428	Cortex KI_vs_WT	-0.0783559	0.0846	0.37266	Arsa	0.815321
1778	7109	P50429	Cortex KI_vs_WT	0.122966	0.0825	0.161998	Arsb	0.627889
1779	7113	P50516	Cortex KI_vs_WT	-0.0576805	0.0654	0.394977	Atp6v1a	0.826916
1780	7117	P50518	Cortex KI_vs_WT	-0.0779846	0.0737	0.310873	Atp6v1e1	0.775614
1781	7121	P50518;Q9D593	Cortex KI_vs_WT	0.165128	0.140348	0.262182	NA	0.739412
1782	7125	P50544	Cortex KI_vs_WT	0.196249	0.0587	0.00585296	Acadvl	0.104682
1783	7129	P50571	Cortex KI_vs_WT	-0.0812207	0.0968	0.418029	Gabrb1	0.837915
1784	7133	P50580	Cortex KI_vs_WT	0.0311642	0.0523	0.562481	Pa2g4	0.903072
1785	7137	P50586	Cortex KI_vs_WT	-0.155432	0.0515	0.0106925	Tub	0.153311
1786	7141	P50608	Cortex KI_vs_WT	0.0441293	0.208486	0.839375	Fmod	1
1787	7145	P51125	Cortex KI_vs_WT	0.25766	0.158672	0.130365	Cast	0.581961
1788	7149	P51141	Cortex KI_vs_WT	-0.00921931	0.0945	0.923896	Dvl1	1
1789	7153	P51141;Q60838	Cortex KI_vs_WT	0.541483	0.2784	0.0755853	NA	0.466201
1790	7157	P51150	Cortex KI_vs_WT	-0.051748	0.0586	0.394543	Rab7	0.82671
1791	7161	P51163	Cortex KI_vs_WT	-0.153809	0.101721	0.156397	Uros	0.618356
1792	7165	P51174	Cortex KI_vs_WT	0.04617	0.0489	0.364172	Acadl	0.810274
1793	7169	P51175	Cortex KI_vs_WT	-0.0150657	0.0666	0.824835	Ppox	1
1794	7173	P51410	Cortex KI_vs_WT	-0.110853	0.137706	0.436483	Rpl9	0.845534
1795	7177	P51410;A0A140T8T4	Cortex KI_vs_WT	0.0685806	0.0526	0.216411	NA	0.692559
1796	7181	P51432	Cortex KI_vs_WT	-0.0999905	0.0708	0.183316	Plcb3	0.656912
1797	7185	P51569	Cortex KI_vs_WT	0.021078	0.0686	0.763955	NA	1
1798	7189	P51612	Cortex KI_vs_WT	NA	NA	NA	Xpc	NA
1799	7193	P51655	Cortex KI_vs_WT	-0.733856	0.193977	0.00260825	Gpc4	0.0589674
1800	7197	P51660	Cortex KI_vs_WT	-0.0345862	0.0454	0.461285	Hsd17b4	0.857804
1801	7201	P51791	Cortex KI_vs_WT	0.19314	0.0599	0.0072839	Clcn3	0.12023
1802	7205	P51807	Cortex KI_vs_WT	-0.077738	0.272717	0.780466	Dynlt1b	1
1803	7209	P51829	Cortex KI_vs_WT	NA	NA	NA	Adcy7	NA
1804	7213	P51830	Cortex KI_vs_WT	0.19623	0.0703	0.0163236	Adcy9	0.199714
1805	7217	P51855	Cortex KI_vs_WT	0.0767702	0.0563	0.197858	Gss	0.67285
1806	7221	P51859	Cortex KI_vs_WT	0.526264	0.202837	0.0234616	Hdgf	0.250845
1807	7225	P51863	Cortex KI_vs_WT	0.0581089	0.046	0.230619	Atp6v0d1	0.706444
1808	7229	P51880	Cortex KI_vs_WT	-0.347955	0.151172	0.0400736	Fabp7	0.338605
1809	7233	P51881	Cortex KI_vs_WT	0.0742744	0.110476	0.514121	Slc25a5	0.882304
1810	7237	P51885	Cortex KI_vs_WT	-0.0318971	0.168743	0.856304	Lum	1
1811	7241	P51906	Cortex KI_vs_WT	0.394229	0.326576	0.250628	Slc1a1	0.727734
1812	7245	P51910	Cortex KI_vs_WT	0.151068	0.0992	0.15358	Apod	0.615557
1813	7249	P51949	Cortex KI_vs_WT	-0.0751225	0.102918	0.479443	Mnat1	0.866793
1814	7253	P51954	Cortex KI_vs_WT	0.0707725	0.0926	0.459315	Nek1	0.856565
1815	7257	P52019	Cortex KI_vs_WT	NA	NA	NA	Sqle	NA
1816	7261	P52189	Cortex KI_vs_WT	-0.33813	0.131092	0.0241273	NA	0.254997
1817	7265	P52194	Cortex KI_vs_WT	0.283254	0.192187	0.166265	Clgn	0.63347
1818	7269	P52196	Cortex KI_vs_WT	0.178672	0.096	0.0874402	Tst	0.497321
1819	7273	P52293	Cortex KI_vs_WT	0.184885	0.159998	0.270359	Kpna2	0.74738
1820	7277	P52332	Cortex KI_vs_WT	-0.0587673	0.0646	0.380633	NA	0.819838
1821	7281	P52431	Cortex KI_vs_WT	-0.127387	0.104618	0.246765	Pold1	0.723902
1822	7285	P52432	Cortex KI_vs_WT	-0.0624123	0.0903	0.502585	Polr1c	0.876327
1823	7289	P52479	Cortex KI_vs_WT	-0.00994799	0.0554	0.860399	Usp10	1
1824	7293	P52480	Cortex KI_vs_WT	-0.0237951	0.0454	0.609614	Pkm	0.925402
1825	7297	P52482	Cortex KI_vs_WT	NA	NA	NA	Ube2e1	NA
1826	7301	P52503	Cortex KI_vs_WT	0.00753297	0.129907	0.954713	Ndufs6	1
1827	7305	P52623	Cortex KI_vs_WT	0.0680969	0.103974	0.524861	Uck1	0.886172
1828	7309	P52624	Cortex KI_vs_WT	0.204878	0.233032	0.396566	Upp1	0.827431
1829	7313	P52633	Cortex KI_vs_WT	0.149136	0.488898	0.772621	Stat6	1
1830	7317	P52734	Cortex KI_vs_WT	0.0214377	0.0957	0.826482	Fgd1	1
1831	7321	P52760	Cortex KI_vs_WT	-0.0340462	0.0874	0.70377	Rida	0.972245
1832	7325	P52795	Cortex KI_vs_WT	-0.320993	0.106469	0.0107642	Efnb1	0.154025
1833	7329	P52800	Cortex KI_vs_WT	-0.0138169	0.0932	0.884647	Efnb2	1
1834	7333	P52825	Cortex KI_vs_WT	0.14254	0.0827	0.110531	Cpt2	0.549668
1835	7337	P52875	Cortex KI_vs_WT	0.57262	0.289897	0.0716964	Tmem165	0.454166
1836	7341	P52912	Cortex KI_vs_WT	-0.0534238	0.162131	0.74745	Tia1	0.994234
1837	7345	P52963	Cortex KI_vs_WT	NA	NA	NA	Epb41l4a	NA
1838	7349	P53026	Cortex KI_vs_WT	0.0640705	0.065	0.34394	NA	0.796572
1839	7353	P53395	Cortex KI_vs_WT	-0.00270659	0.0525	0.95976	Dbt	1
1840	7357	P53564	Cortex KI_vs_WT	-0.0120421	0.099	0.905234	Cux1	1
1841	7361	P53564;P70298	Cortex KI_vs_WT	0.579651	0.193252	0.0110779	NA	0.157114
1842	7365	P53612	Cortex KI_vs_WT	-0.054299	0.0813	0.516889	Rabggtb	0.883727
1843	7369	P53657	Cortex KI_vs_WT	1.19371	0.580547	0.0621883	NA	0.422282
1844	7373	P53668	Cortex KI_vs_WT	0.115834	0.0975	0.257757	Limk1	0.735043
1845	7377	P53702	Cortex KI_vs_WT	0.312945	0.0759	0.00141418	Hccs	0.0367749
1846	7381	P53798	Cortex KI_vs_WT	0.0640361	0.194102	0.747156	Fdft1	0.994059
1847	7385	P53808	Cortex KI_vs_WT	NA	NA	NA	NA	NA
1848	7389	P53810	Cortex KI_vs_WT	0.0965354	0.0398	0.0321656	Pitpna	0.301795
1849	7393	P53811	Cortex KI_vs_WT	0.281214	0.149415	0.0842919	Pitpnb	0.489112
1850	7397	P53986	Cortex KI_vs_WT	0.267896	0.149402	0.0981754	Slc16a1	0.522054
1851	7401	P53994	Cortex KI_vs_WT	-0.24893	0.0562	0.000826053	Rab2a	0.0249464
1852	7405	P53995	Cortex KI_vs_WT	-0.0801968	0.0505	0.138316	Anapc1	0.592353
1853	7409	P53996	Cortex KI_vs_WT	NA	NA	NA	Cnbp	NA
1854	7413	P54071	Cortex KI_vs_WT	0.144283	0.0545	0.0212001	Idh2	0.236025
1855	7417	P54103	Cortex KI_vs_WT	-0.0806898	0.0896	0.385402	Dnajc2	0.821388
1856	7421	P54116	Cortex KI_vs_WT	-0.200883	0.124945	0.133863	Stom	0.587338
1857	7425	P54227	Cortex KI_vs_WT	-0.474313	0.160417	0.0119929	Stmn1	0.1656
1858	7429	P54254	Cortex KI_vs_WT	0.15471	0.0849	0.0935391	Atxn1	0.512885
1859	7433	P54276	Cortex KI_vs_WT	0.130048	0.0684	0.0814574	Msh6	0.481309
1860	7437	P54285	Cortex KI_vs_WT	-0.0352641	0.0486	0.481915	Cacnb3	0.868111
1861	7441	P54310	Cortex KI_vs_WT	-0.0042124	0.0806	0.959184	Lipe	1
1862	7445	P54726	Cortex KI_vs_WT	0.271096	0.20027	0.200794	Rad23a	0.675152
1863	7449	P54728	Cortex KI_vs_WT	-0.0879364	0.125914	0.498247	Rad23b	0.874896
1864	7453	P54729	Cortex KI_vs_WT	-0.143747	0.0578	0.0284893	Nub1	0.281567
1865	7457	P54731	Cortex KI_vs_WT	0.0228834	0.048	0.642248	Faf1	0.943158
1866	7461	P54751	Cortex KI_vs_WT	NA	NA	NA	St3gal1	NA
1867	7465	P54754	Cortex KI_vs_WT	0.363639	0.125271	0.0132565	Ephb3	0.176066
1868	7469	P54754;P54761	Cortex KI_vs_WT	NA	NA	NA	NA	NA
1869	7473	P54763	Cortex KI_vs_WT	0.424992	0.159685	0.0207359	Ephb2	0.232955
1870	7477	P54775	Cortex KI_vs_WT	0.00987399	0.0448	0.829336	Psmc4	1
1871	7481	P54797	Cortex KI_vs_WT	0.0937334	0.128095	0.478369	NA	0.865811
1872	7485	P54818	Cortex KI_vs_WT	0.0900771	0.0743	0.248577	Galc	0.726174
1873	7489	P54822	Cortex KI_vs_WT	0.285984	0.0536	0.000177918	Adsl	0.00747964
1874	7493	P54823	Cortex KI_vs_WT	0.0558794	0.0368	0.154525	Ddx6	0.616791
1875	7497	P54830	Cortex KI_vs_WT	-0.0456368	0.0778	0.568207	Ptpn5	0.905999
1876	7501	P54869	Cortex KI_vs_WT	0.23456	0.1817	0.221047	Hmgcs2	0.697124
1877	7505	P54923	Cortex KI_vs_WT	0.00362611	0.0897	0.968407	Adprh	1
1878	7509	P55012	Cortex KI_vs_WT	0.118396	0.0652	0.0945959	Slc12a2	0.514945
1879	7513	P55012;P55014	Cortex KI_vs_WT	0.237689	0.136855	0.107999	NA	0.544933
1880	7517	P55065	Cortex KI_vs_WT	-0.128925	0.162097	0.441854	Pltp	0.847191
1881	7521	P55066	Cortex KI_vs_WT	-0.177745	0.0607	0.0126595	Ncan	0.171116
1882	7525	P55088	Cortex KI_vs_WT	-0.220865	0.286554	0.455756	Aqp4	0.855094
1883	7529	P55095	Cortex KI_vs_WT	NA	NA	NA	Gcg	NA
1884	7533	P55096	Cortex KI_vs_WT	0.0520776	0.0648	0.437357	Abcd3	0.846174
1885	7537	P55099	Cortex KI_vs_WT	NA	NA	NA	Tac2	NA
1886	7541	P55144	Cortex KI_vs_WT	0.0471131	0.0959	0.632233	Tyro3	0.937824
1887	7545	P55194	Cortex KI_vs_WT	0.157383	0.0988	0.137055	Sh3bp1	0.590597
1888	7549	P55200	Cortex KI_vs_WT	-0.0875775	0.153973	0.579992	NA	0.910831
1889	7553	P55258	Cortex KI_vs_WT	0.13788	0.084	0.126788	Rab8a	0.576761
1890	7557	P55264	Cortex KI_vs_WT	0.176897	0.0603	0.0125495	Adk	0.170469
1891	7561	P55284	Cortex KI_vs_WT	0.0629609	0.139939	0.66079	Cdh5	0.951923
1892	7565	P55288	Cortex KI_vs_WT	0.218163	0.0904	0.0326481	Cdh11	0.303693
1893	7569	P55302	Cortex KI_vs_WT	-0.157616	0.098	0.133621	Lrpap1	0.58723
1894	7573	P55772	Cortex KI_vs_WT	0.0860218	0.0741	0.268036	Entpd1	0.745011
1895	7577	P55821	Cortex KI_vs_WT	-0.249314	0.17378	0.176931	Stmn2	0.647516
1896	7581	P55937	Cortex KI_vs_WT	-0.0408438	0.0352	0.268552	Golga3	0.74555
1897	7585	P56135	Cortex KI_vs_WT	-0.0168616	0.35678	0.963083	Atp5mf	1
1898	7589	P56183	Cortex KI_vs_WT	-0.219708	0.117269	0.0855455	Rrp1	0.492111
1899	7593	P56212	Cortex KI_vs_WT	0.237602	0.161612	0.167234	Arpp19	0.634561
1900	7597	P56213	Cortex KI_vs_WT	0.0460648	0.057	0.434792	Gfer	0.844572
1901	7601	P56371	Cortex KI_vs_WT	-0.00330917	0.0528	0.951019	Rab4a	1
1902	7605	P56375	Cortex KI_vs_WT	0.122012	0.09	0.200094	Acyp2	0.674711
1903	7609	P56376	Cortex KI_vs_WT	0.139442	0.0654	0.0543359	Acyp1	0.39451
1904	7613	P56379	Cortex KI_vs_WT	0.297312	0.220828	0.20307	Atp5mj	0.67791
1905	7617	P56380	Cortex KI_vs_WT	0.0284127	0.0747	0.710176	Nudt2	0.975408
1906	7621	P56382	Cortex KI_vs_WT	0.0368434	0.120033	0.764147	Atp5f1e	1
1907	7625	P56387	Cortex KI_vs_WT	NA	NA	NA	Dynlt3	NA
1908	7629	P56388	Cortex KI_vs_WT	-0.411997	0.215507	0.0800774	Cartpt	0.477564
1909	7633	P56389	Cortex KI_vs_WT	-0.490677	0.189679	0.0237942	Cda	0.253072
1910	7637	P56391	Cortex KI_vs_WT	-0.0618684	0.129729	0.641997	Cox6b1	0.943149
1911	7641	P56392	Cortex KI_vs_WT	0.596946	0.110464	0.000159054	Cox7a1	0.00684651
1912	7645	P56394	Cortex KI_vs_WT	0.0676561	0.294046	0.8219	Cox17	1
1913	7649	P56395	Cortex KI_vs_WT	0.0442213	0.113008	0.702426	Cyb5a	0.971539
1914	7653	P56399	Cortex KI_vs_WT	0.0134365	0.0813	0.871433	Usp5	1
1915	7657	P56473	Cortex KI_vs_WT	-0.0492336	0.18638	0.796141	Agrp	1
1916	7661	P56480	Cortex KI_vs_WT	0.0164823	0.0981	0.869408	Atp5f1b	1
1917	7665	P56501	Cortex KI_vs_WT	0.0880504	0.0846	0.318505	Ucp3	0.781237
1918	7669	P56501;P70406	Cortex KI_vs_WT	0.199568	0.201961	0.361238	NA	0.809086
1919	7673	P56528	Cortex KI_vs_WT	0.231382	0.110477	0.0581207	Cd38	0.40731
1920	7677	P56546	Cortex KI_vs_WT	0.0932285	0.111002	0.417394	Ctbp2	0.83754
1921	7681	P56564	Cortex KI_vs_WT	-0.0790763	0.096	0.4263	Slc1a3	0.841097
1922	7685	P56564;O35544	Cortex KI_vs_WT	-0.119863	0.234792	0.618956	NA	0.93064
1923	7689	P56565	Cortex KI_vs_WT	0.850617	0.657642	0.220205	S100a1	0.696654
1924	7693	P56581	Cortex KI_vs_WT	0.16489	0.12563	0.2139	Tdg	0.689408
1925	7697	P56695	Cortex KI_vs_WT	-0.621396	0.310611	0.0685877	Wfs1	0.444426
1926	7701	P56812	Cortex KI_vs_WT	-0.219278	0.131687	0.121753	Pdcd5	0.568498
1927	7705	P56818	Cortex KI_vs_WT	-0.0721597	0.108273	0.517724	Bace1	0.884122
1928	7709	P56873	Cortex KI_vs_WT	0.0713672	0.0691	0.322366	Znrd2	0.783831
1929	7713	P56942	Cortex KI_vs_WT	0.772036	0.444729	0.108148	Pmch	0.545007
1930	7717	P56959	Cortex KI_vs_WT	0.0634404	0.193474	0.748637	Fus	0.994833
1931	7721	P56960	Cortex KI_vs_WT	-0.0616889	0.127567	0.637389	Exosc10	0.940784
1932	7725	P57080	Cortex KI_vs_WT	0.160891	0.0968	0.122297	Usp25	0.56963
1933	7729	P57716	Cortex KI_vs_WT	-0.0298276	0.0995	0.769491	Ncstn	1
1934	7733	P57722	Cortex KI_vs_WT	0.200408	0.146708	0.196982	Pcbp3	0.671564
1935	7737	P57724	Cortex KI_vs_WT	-0.164485	0.124696	0.211758	Pcbp4	0.686901
1936	7741	P57746	Cortex KI_vs_WT	-0.021758	0.0382	0.579417	Atp6v1d	0.910554
1937	7745	P57759	Cortex KI_vs_WT	-0.164833	0.0626	0.0219058	Erp29	0.24107
1938	7749	P57774	Cortex KI_vs_WT	0.47734	0.190704	0.0277597	Npy	0.277647
1939	7753	P57776	Cortex KI_vs_WT	-0.00120773	0.0768	0.987708	Eef1d	1
1940	7757	P57780	Cortex KI_vs_WT	0.0562475	0.0503	0.285372	Actn4	0.757447
1941	7761	P57784	Cortex KI_vs_WT	0.118306	0.0587	0.0667213	Snrpa1	0.438092
1942	7765	P58006	Cortex KI_vs_WT	-0.0671157	0.120572	0.588	Sesn1	0.915156
1943	7769	P58021	Cortex KI_vs_WT	0.0630062	0.076	0.423489	Tm9sf2	0.839797
1944	7773	P58044	Cortex KI_vs_WT	0.0294484	0.112388	0.797746	Idi1	1
1945	7777	P58058	Cortex KI_vs_WT	-0.146133	0.126239	0.269556	Nadk	0.74643
1946	7781	P58059	Cortex KI_vs_WT	0.0534297	0.103226	0.614146	Mrps21	0.928145
1947	7785	P58064	Cortex KI_vs_WT	0.221771	0.10455	0.0554165	Mrps6	0.398243
1948	7789	P58069	Cortex KI_vs_WT	0.0205908	0.0553	0.716103	Rasa2	0.978521
1949	7793	P58137	Cortex KI_vs_WT	0.0210757	0.0732	0.778188	Acot8	1
1950	7797	P58158	Cortex KI_vs_WT	-0.0131686	0.0952	0.892221	B3gat3	1
1951	7801	P58196	Cortex KI_vs_WT	-0.0548374	0.402799	0.893967	Plscr4	1
1952	7805	P58242	Cortex KI_vs_WT	-0.903662	0.205065	0.000855275	Smpdl3b	0.0254294
1953	7809	P58252	Cortex KI_vs_WT	0.0373793	0.0395	0.362224	Eef2	0.809086
1954	7813	P58269	Cortex KI_vs_WT	0.0224452	0.183856	0.906822	Dpf3	1
1955	7817	P58281	Cortex KI_vs_WT	0.121544	0.0356	0.00515907	Opa1	0.0959068
1956	7821	P58389	Cortex KI_vs_WT	0.0480552	0.0967	0.628251	Ptpa	0.935786
1957	7825	P58390	Cortex KI_vs_WT	0.507336	0.151221	0.00572776	Kcnn2	0.103008
1958	7829	P58391	Cortex KI_vs_WT	-0.54774	0.170478	0.00745108	Kcnn3	0.121674
1959	7833	P58404	Cortex KI_vs_WT	0.0740883	0.0477	0.146041	Strn4	0.604188
1960	7837	P58462	Cortex KI_vs_WT	0.429642	0.157551	0.034322	Foxp1	0.31167
1961	7841	P58465	Cortex KI_vs_WT	NA	NA	NA	Ctdspl	NA
1962	7845	P58466	Cortex KI_vs_WT	-0.0950118	0.117706	0.435262	Ctdsp1	0.84474
1963	7849	P58468	Cortex KI_vs_WT	-0.0104986	0.0834	0.901952	Slx9	1
1964	7853	P58501	Cortex KI_vs_WT	0.525734	0.130232	0.00164862	Paxbp1	0.0414583
1965	7857	P58544	Cortex KI_vs_WT	0.140145	0.138037	0.33001	Btbd1	0.788682
1966	7861	P58686	Cortex KI_vs_WT	-0.00119492	0.139037	0.993284	Bbln	1
1967	7865	P58742	Cortex KI_vs_WT	-0.100837	0.0741	0.198693	Aaas	0.673396
1968	7869	P58771	Cortex KI_vs_WT	0.0281157	0.256351	0.914479	Tpm1	1
1969	7873	P58802	Cortex KI_vs_WT	-0.0780934	0.0573	0.198193	Tbc1d10a	0.673072
1970	7877	P58854	Cortex KI_vs_WT	-0.0322113	0.0537	0.559782	Tubgcp3	0.901418
1971	7881	P58871	Cortex KI_vs_WT	-0.0962336	0.0598	0.133627	Tnks1bp1	0.58723
1972	7885	P58873	Cortex KI_vs_WT	NA	NA	NA	Rhbdl3	NA
1973	7889	P58929	Cortex KI_vs_WT	0.146461	0.0668	0.0489099	Gmeb2	0.373778
1974	7893	P59016	Cortex KI_vs_WT	0.0175305	0.0392	0.662754	Vps33b	0.952716
1975	7897	P59017	Cortex KI_vs_WT	0.414255	0.239792	0.10969	Bcl2l13	0.548357
1976	7901	P59024	Cortex KI_vs_WT	NA	NA	NA	Fkbp14	NA
1977	7905	P59041	Cortex KI_vs_WT	0.127568	0.0948	0.203343	Dnajc30	0.678104
1978	7909	P59108	Cortex KI_vs_WT	-0.142411	0.111787	0.226801	Cpne2	0.702782
1979	7913	P59114	Cortex KI_vs_WT	0.201873	0.129003	0.143591	Pcif1	0.599753
1980	7917	P59235	Cortex KI_vs_WT	0.0535601	0.0833	0.532277	Nup43	0.889449
1981	7921	P59240	Cortex KI_vs_WT	-0.00912473	0.127007	0.94391	Nphp4	1
1982	7925	P59242	Cortex KI_vs_WT	-0.0933081	0.105738	0.394869	NA	0.826916
1983	7929	P59266	Cortex KI_vs_WT	NA	NA	NA	Fitm2	NA
1984	7933	P59267	Cortex KI_vs_WT	-0.114093	0.126477	0.384761	Zdhhc2	0.821388
1985	7937	P59270	Cortex KI_vs_WT	NA	NA	NA	B3gat2	NA
1986	7941	P59279	Cortex KI_vs_WT	-0.0573212	0.0895	0.533948	Rab2b	0.890162
1987	7945	P59281	Cortex KI_vs_WT	0.0905955	0.0612	0.164247	Arhgap39	0.63088
1988	7949	P59325	Cortex KI_vs_WT	0.00425757	0.0502	0.933743	Eif5	1
1989	7953	P59326	Cortex KI_vs_WT	0.075193	0.0384	0.0737936	Ythdf1	0.46158
1990	7957	P59470	Cortex KI_vs_WT	0.3141	0.101346	0.00920229	Polr3b	0.139076
1991	7961	P59481	Cortex KI_vs_WT	-0.172557	0.0671	0.0244381	Lman2l	0.25707
1992	7965	P59644	Cortex KI_vs_WT	0.255268	0.0553	0.000593357	Inpp5j	0.0191692
1993	7969	P59648	Cortex KI_vs_WT	-1.01025	0.458877	0.0480018	Fxyd7	0.37066
1994	7973	P59672	Cortex KI_vs_WT	0.079797	0.124752	0.534424	Anks1	0.890331
1995	7977	P59759	Cortex KI_vs_WT	-0.0842569	0.0537	0.142941	Mrtfb	0.598261
1996	7981	P59764	Cortex KI_vs_WT	-0.0628058	0.0668	0.365666	Dock4	0.81124
1997	7985	P59808	Cortex KI_vs_WT	-0.0161585	0.0994	0.873536	Sash1	1
1998	7989	P59808;P57725	Cortex KI_vs_WT	0.153474	0.136363	0.282392	NA	0.755621
1999	7993	P59823	Cortex KI_vs_WT	-0.0104466	0.0805	0.898873	NA	1
[truncated: 6,966 more rows]

## Sheet: Cortex_protein_GO
	query	significant	p_value	term_size	query_size	intersection_size	precision	recall	term_id	source	term_name	effective_domain_size	source_order	parents	evidence_codes	intersection	gene_ratio
1	query_1	TRUE	2.05e-08	15777	193	180	0.932642	0.011409	GO:0009987	GO:BP	cellular process	21165	3796	GO:0008150	IGI ISS,IBA,IBA NAS,ISO IBA,IDA IBA,ISA,IMP IBA,IMP ISO IBA,IBA,IGI ISS ISO,IMP ISS,EXP IDA IMP IGI ISS ISO IBA,IDA IMP IGI ISS ISO IBA,IDA ISO IBA,IDA IMP ISS IBA,IMP,IDA IGI IBA,ISS,IMP ISO IBA,ISO IBA,IDA IMP ISS IBA,IDA IMP ISS,IDA ISS ISO IBA,IBA,IDA IBA,IDA IMP IBA TAS NAS,IDA IGI ISS ISO IBA IC,TAS,IDA IGI ISS IBA,IDA IMP IGI IBA,IDA IMP IGI ISO IBA IC,IDA IMP ISS ISO IBA,IDA IMP IGI ISS I…	Dhtkd1,Fbxl16,Exoc6b,Pigg,Pcdh10,Or51v14,Wdfy1,Cacna1i,Nfxl1,Farp1,Ro60,Ntn1,Gclm,Kpna4,Kpna6,Pld3,Cdk5r2,Nmt2,Dhcr7,Gosr1,Pomc,Mb,Got2,Klk1,Klk1b22,Ap2a2,Tpi1,Lsp1,Pcgf2,Ndn,Fas,Kif5c,Ptpn6,Prkar2b,Ptpn11,Cd81,Por,Acvr1,Crkl,Impdh1,Nek1,Pkm,Tyro3,Mrps21,Opa1,Gmeb2,Timm10,Prkacb,Tuba4a,Adcyap1r1,Nos3,Hnrnph2,Cdh10,Sms,Smad5,Cacna1c,Prkcz,Anxa7,Dok7,Pip4p1,2510002D24Rik,Tmem109,Spout1,Nr1d1,Gpr149…	0.011
2	query_1	TRUE	0.000146198	9265	193	121	0.626943	0.0130599	GO:0008152	GO:BP	metabolic process	21165	3111	GO:0009987	ISS,IBA,ISO IBA,IBA,ISS,IDA IMP ISS ISO IBA,IMP,IMP,ISS,IMP ISO IBA,IDA IMP ISS,ISS,IDA ISS ISO IBA,IBA,IDA IBA,IDA IGI ISS ISO IBA IC,IGI IBA,IDA IMP IGI IBA,IMP,IMP IGI,IMP,IMP IGI ISS,IMP ISS,ISO,IMP,IMP IGI,IMP IBA TAS,IDA ISS ISO IBA,ISS,ISS NAS,IMP ISS,IBA,IDA IGI,ISO,IMP IGI ISO IBA,IBA,IMP ISO IBA,IDA IGI IBA,IMP ISS,IDA IMP,ISS IBA,ISS IBA,IDA IMP ISO IBA,ISS,IMP ISO,IDA,IDA IMP ISS IBA,…	Dhtkd1,Fbxl16,Pigg,Nfxl1,Ro60,Gclm,Kpna6,Pld3,Nmt2,Dhcr7,Pomc,Mb,Got2,Klk1,Klk1b22,Tpi1,Pcgf2,Ndn,Fas,Ptpn6,Prkar2b,Ptpn11,Cd81,Por,Acvr1,Crkl,Impdh1,Pkm,Tyro3,Mrps21,Opa1,Gmeb2,Prkacb,Adcyap1r1,Nos3,Hnrnph2,Sms,Smad5,Prkcz,Dok7,Pip4p1,Spout1,Nr1d1,Klhdc2,Lrrk2,Crhbp,Rai1,Abcg1,Isy1,Dusp23,Cyfip1,Fbxo11,Gtf2a2,Pdk1,Ptbp3,Atcay,Bmp3,Serinc5,Pgghg,Casp9,Tmt1a,Tsku,Dpyd,Gatad2a,Angel2,Ablim1,Aldh1l1…	0.013
3	query_1	TRUE	0.00017869	4325	193	71	0.367876	0.0164162	GO:0051179	GO:BP	localization	21165	13378	GO:0008150	IBA NAS,ISO IBA,IGI,IDA,IDA ISO IBA,IDA ISS IBA,IDA,ISO IBA,IMP IBA,ISO IBA,IDA IMP IBA TAS NAS,IDA IMP ISS ISO IBA,IGI,IMP,IDA IMP ISS,IDA IMP IGI,IMP IGI IBA,ISO,IDA IBA,ISO,IMP,IDA IMP ISS ISO IBA,IMP ISO,IMP IGI,IDA IMP IGI,ISS,ISS IBA,IMP,IMP IBA,IDA IMP ISO TAS,IMP IBA,IDA ISS ISO IBA,IDA IMP ISS ISO IBA,ISS,ISO,ISO,IBA,ISS ISO,IBA,IBA,ISO,IMP IBA,IMP,ISO,IBA NAS,ISO IBA,IMP,IDA IMP ISO IBA…	Exoc6b,Cacna1i,Farp1,Ntn1,Kpna4,Kpna6,Cdk5r2,Gosr1,Pomc,Mb,Ap2a2,Kif5c,Ptpn6,Ptpn11,Cd81,Crkl,Tyro3,Opa1,Timm10,Adcyap1r1,Nos3,Cacna1c,Prkcz,Anxa7,Dok7,Pip4p1,Spout1,Nr1d1,Slc25a31,Lrrk2,Arcn1,Crhbp,Abcg1,Ripor1,Cyfip1,Fbxo11,Ano10,Atcay,Slc9a7,Srp68,Neto2,Tctn1,Tsku,Ubac2,Gle1,Slco3a1,Bloc1s4,Dtnbp1,Gorasp1,Sh3bp4,Neurl1a,Plpp3,Grpel1,Zdhhc6,Chmp3,Immp1l,Tomm34,Cmtm6,Atp5f1d,Golga7b,Borcs8,Appbp…	0.016
4	query_1	TRUE	0.00152896	2907	193	52	0.26943	0.0178879	GO:0051641	GO:BP	cellular localization	21165	13664	GO:0009987, GO:0051179	IBA NAS,IGI,IDA,IDA ISO IBA,IDA ISS IBA,ISO IBA,IDA IMP TAS NAS,IDA IMP ISS ISO IBA,IGI,IMP,IMP ISS,IDA IMP IGI,IMP,IDA IBA,ISO,IMP,IDA IMP ISS ISO,IMP ISO,IMP IGI,IDA IMP IGI,ISS IBA,IMP,IDA IMP ISO TAS,IMP IBA,ISO,ISS,ISO,ISS,IBA,ISO,IMP IBA,ISO,IBA NAS,IMP,IDA IMP ISO IBA,ISS,ISS,IBA,IBA,ISO IBA NAS,IBA,IBA,ISS,IBA,NAS,ISO,IMP,IMP,IMP,IGI,IDA,IGI	Exoc6b,Farp1,Ntn1,Kpna4,Kpna6,Gosr1,Ap2a2,Kif5c,Ptpn6,Ptpn11,Cd81,Crkl,Tyro3,Timm10,Adcyap1r1,Nos3,Cacna1c,Prkcz,Anxa7,Dok7,Spout1,Nr1d1,Lrrk2,Arcn1,Abcg1,Ripor1,Cyfip1,Atcay,Srp68,Neto2,Tctn1,Ubac2,Gle1,Bloc1s4,Dtnbp1,Gorasp1,Sh3bp4,Grpel1,Zdhhc6,Chmp3,Immp1l,Tomm34,Cmtm6,Golga7b,Borcs8,Appbp2,Pfn2,Selenok,Cln8,Ulk2,Timm9,Bnip3l	0.018
5	query_1	TRUE	0.00171159	1522	193	34	0.176166	0.022339	GO:0120036	GO:BP	plasma membrane bounded cell projection organization	21165	19210	GO:0030030	ISS ISO,IMP,IDA IMP ISS ISO IBA,IBA,IMP,ISO,IMP IBA,IMP,IGI,ISO,IGI,IDA IBA,IGI ISS ISO,IBA,IMP,IDA IMP ISS ISO IBA,IDA ISO,ISS IBA,IMP IBA,IMP,IDA ISO IBA,IBA,NAS,IDA IMP ISS ISO IBA NAS,ISS ISO,IDA IMP,IDA IMP,IBA,ISO,IGI IBA,IMP,ISO,IMP,IMP IBA	Farp1,Ro60,Ntn1,Cdk5r2,Ndn,Fas,Kif5c,Ptpn11,Crkl,Opa1,Prkcz,Myo16,Lrrk2,Dusp23,Mtss2,Cyfip1,Atcay,Ttc12,Tctn1,Tsku,Ablim1,Rttn,Bloc1s4,Dtnbp1,Gorasp1,Srgap2,Neurl1a,Eps8l2,Stk24,Chodl,Efhd1,Slc23a2,Pfn2,Ulk2	0.022
6	query_1	TRUE	0.00181822	7915	193	105	0.544041	0.013266	GO:0044238	GO:BP	primary metabolic process	21165	10839	GO:0008152	IBA,ISO IBA,IBA,IMP ISS,IMP,ISS,IMP ISO IBA,IMP ISS,IDA ISS ISO IBA,IBA,IDA IBA,IDA IGI IBA IC,IGI IBA,IDA IMP IGI IBA,IMP,IMP,IMP ISS,ISO,IMP,IGI,IMP IBA TAS,IDA ISS ISO IBA,ISS,ISS NAS,ISS,IBA,IDA IGI,ISO,IBA,IBA,IDA IGI IBA,ISS,IDA IMP,ISS IBA,ISS IBA,IDA IMP ISO IBA,ISS,IMP,IDA ISS IBA,IMP,ISS IBA,EXP IDA IMP IEP IBA,ISS ISO IBA,ISO IBA NAS,IMP ISS IBA,IMP IBA,ISS,IDA,ISS ISO,IBA,ISO RCA,ISS,…	Fbxl16,Pigg,Nfxl1,Gclm,Kpna6,Nmt2,Dhcr7,Pomc,Got2,Klk1,Klk1b22,Tpi1,Pcgf2,Ndn,Ptpn6,Prkar2b,Ptpn11,Por,Acvr1,Crkl,Impdh1,Pkm,Tyro3,Mrps21,Opa1,Gmeb2,Prkacb,Adcyap1r1,Nos3,Hnrnph2,Smad5,Prkcz,Dok7,Pip4p1,Spout1,Nr1d1,Klhdc2,Lrrk2,Rai1,Abcg1,Isy1,Cyfip1,Fbxo11,Gtf2a2,Pdk1,Ptbp3,Atcay,Bmp3,Serinc5,Pgghg,Casp9,Tmt1a,Tsku,Dpyd,Gatad2a,Angel2,Ablim1,Aldh1l1,Zc3h10,Tcf25,Tmx1,Gtf2h3,Ubac1,Psmd2,St3gal6,…	0.013
7	query_1	TRUE	0.00211376	1055	193	27	0.139896	0.0255924	GO:0031175	GO:BP	neuron projection development	21165	7049	GO:0048666, GO:0120036	ISS ISO,IDA IMP ISO IBA,IBA,IMP,ISO,IMP IBA,IMP,IGI,ISO,IGI,IDA IBA,IGI ISS ISO,IMP ISS ISO IBA,IDA ISO,IMP,IMP,IDA,NAS,IDA IMP ISS ISO IBA NAS,ISS ISO,IMP,IDA,ISO,IGI IBA,IMP,ISO,IMP IBA	Farp1,Ntn1,Cdk5r2,Ndn,Fas,Kif5c,Ptpn11,Crkl,Opa1,Prkcz,Myo16,Lrrk2,Cyfip1,Atcay,Tctn1,Tsku,Ablim1,Bloc1s4,Dtnbp1,Gorasp1,Srgap2,Neurl1a,Stk24,Chodl,Efhd1,Slc23a2,Ulk2	0.026
8	query_1	TRUE	0.00243227	1546	193	34	0.176166	0.0219922	GO:0030030	GO:BP	cell projection organization	21165	6621	GO:0016043	ISS ISO,IMP,IDA IMP ISS ISO IBA,IBA,IMP,ISO,IMP IBA,IMP,IGI,ISO,IGI,IDA IBA,IGI ISS ISO,IBA,IMP IBA,IDA IMP ISS ISO IBA,IDA ISO,ISS IBA,IMP IBA,IMP,IDA ISO IBA,IBA,NAS,IDA IMP ISS ISO IBA NAS,ISS ISO,IDA IMP,IDA IMP,IBA,ISO,IGI IBA,IMP,ISO,IMP,IMP IBA	Farp1,Ro60,Ntn1,Cdk5r2,Ndn,Fas,Kif5c,Ptpn11,Crkl,Opa1,Prkcz,Myo16,Lrrk2,Dusp23,Mtss2,Cyfip1,Atcay,Ttc12,Tctn1,Tsku,Ablim1,Rttn,Bloc1s4,Dtnbp1,Gorasp1,Srgap2,Neurl1a,Eps8l2,Stk24,Chodl,Efhd1,Slc23a2,Pfn2,Ulk2	0.022
9	query_1	TRUE	0.00420898	654	193	20	0.103627	0.030581	GO:0048812	GO:BP	neuron projection morphogenesis	21165	12891	GO:0031175, GO:0120039	ISS ISO,IDA IMP ISO IBA,IBA,IMP,IMP IBA,IMP,ISO,IGI,IDA IBA,IGI ISS ISO,IMP ISS ISO IBA,IMP,IMP,IDA,IDA IMP ISO,ISS ISO,IMP,IBA,ISO,IMP IBA	Farp1,Ntn1,Cdk5r2,Ndn,Kif5c,Ptpn11,Opa1,Prkcz,Myo16,Lrrk2,Cyfip1,Tctn1,Tsku,Ablim1,Dtnbp1,Gorasp1,Srgap2,Chodl,Slc23a2,Ulk2	0.031
10	query_1	TRUE	0.00505564	662	193	20	0.103627	0.0302115	GO:0120039	GO:BP	plasma membrane bounded cell projection morphogenesis	21165	19211	GO:0048858	ISS ISO,IDA IMP ISO IBA,IBA,IMP,IMP IBA,IMP,ISO,IGI,IDA IBA,IGI ISS ISO,IMP ISS ISO IBA,IMP,IMP,IDA,IDA IMP ISO,ISS ISO,IMP,IBA,ISO,IMP IBA	Farp1,Ntn1,Cdk5r2,Ndn,Kif5c,Ptpn11,Opa1,Prkcz,Myo16,Lrrk2,Cyfip1,Tctn1,Tsku,Ablim1,Dtnbp1,Gorasp1,Srgap2,Chodl,Slc23a2,Ulk2	0.03
11	query_1	TRUE	0.00592039	669	193	20	0.103627	0.0298954	GO:0048858	GO:BP	cell projection morphogenesis	21165	12933	GO:0000902, GO:0009653, GO:0030030	ISS ISO,IDA IMP ISO IBA,IBA,IMP,IMP IBA,IMP,ISO,IGI,IDA IBA,IGI ISS ISO,IMP ISS ISO IBA,IMP,IMP,IDA,IDA IMP ISO,ISS ISO,IMP,IBA,ISO,IMP IBA	Farp1,Ntn1,Cdk5r2,Ndn,Kif5c,Ptpn11,Opa1,Prkcz,Myo16,Lrrk2,Cyfip1,Tctn1,Tsku,Ablim1,Dtnbp1,Gorasp1,Srgap2,Chodl,Slc23a2,Ulk2	0.03
12	query_1	TRUE	0.00876047	3777	193	60	0.310881	0.0158856	GO:0051234	GO:BP	establishment of localization	21165	13403	GO:0051179	IBA NAS,ISO IBA,IDA,IDA ISO IBA,IDA ISS IBA,IDA,ISO IBA,IMP IBA,ISO IBA,IDA IMP IBA TAS NAS,IDA IMP ISS ISO IBA,IGI,IMP,IDA ISS,IMP IGI IBA,ISO,IDA IBA,ISO,IMP,IDA IMP ISS ISO IBA,ISO,IMP IGI,IMP,IMP IBA,IDA IMP ISO TAS,IMP IBA,IDA ISS ISO IBA,IDA IMP ISS ISO IBA,ISS,ISO,ISO,IBA,IBA,IBA,IMP,IBA NAS,ISO IBA,IMP,IDA IMP ISO IBA,ISS,IMP,ISS,IBA,IBA,ISO IBA NAS,IBA,IBA,ISS,ISO,IBA,NAS,ISO,IDA,IDA IMP…	Exoc6b,Cacna1i,Ntn1,Kpna4,Kpna6,Cdk5r2,Gosr1,Pomc,Mb,Ap2a2,Kif5c,Ptpn6,Ptpn11,Cd81,Tyro3,Opa1,Timm10,Adcyap1r1,Nos3,Cacna1c,Prkcz,Anxa7,Nr1d1,Slc25a31,Lrrk2,Arcn1,Crhbp,Abcg1,Ripor1,Cyfip1,Fbxo11,Ano10,Slc9a7,Srp68,Tsku,Gle1,Slco3a1,Bloc1s4,Dtnbp1,Gorasp1,Neurl1a,Plpp3,Grpel1,Zdhhc6,Chmp3,Immp1l,Tomm34,Cmtm6,Atp5f1d,Golga7b,Borcs8,Appbp2,Crot,Slc23a2,Syt13,Pfn2,Selenok,Cln8,Timm9,Bnip3l	0.016
13	query_1	TRUE	0.0112636	952	193	24	0.124352	0.0252101	GO:0000902	GO:BP	cell morphogenesis	21165	238	GO:0009653	ISS ISO,IDA IMP ISO IBA,IBA,IMP,IMP IBA,IGI,IMP IGI,ISO,IBA,IGI,IMP,IDA IBA,IGI ISS ISO,IMP ISS ISO IBA,IMP,IMP,IDA,IDA IMP ISO,ISS ISO,IMP,IBA,ISO,ISO,IMP IBA	Farp1,Ntn1,Cdk5r2,Ndn,Kif5c,Ptpn6,Ptpn11,Opa1,Cdh10,Prkcz,Anxa7,Myo16,Lrrk2,Cyfip1,Tctn1,Tsku,Ablim1,Dtnbp1,Gorasp1,Srgap2,Chodl,Slc23a2,Stk4,Ulk2	0.025
14	query_1	TRUE	0.0165708	5528	193	78	0.404145	0.01411	GO:0016043	GO:BP	cellular component organization	21165	5053	GO:0071840	NAS,IGI ISS ISO,IMP,EXP IDA IMP ISS ISO IBA,IGI,IBA,IBA,TAS,IGI ISS,IMP,IDA ISO IC,IMP IBA,IMP ISO,IDA IMP IGI,ISO,IDA IMP ISS ISO IBA NAS,IDA IBA,IBA,IDA IMP IBA,IMP IGI,IMP ISO,IDA IMP IGI IBA,IMP,IMP IBA,IDA IBA,IDA IMP IGI ISS ISO IC,IMP ISO,IBA,IBA,IDA IMP IBA,IMP IBA,IDA IMP ISS ISO IBA,IDA IBA TAS,IBA NAS,IDA ISO,ISS IBA,IMP IBA,IMP,ISO,IDA ISO IBA,IBA,ISS,IBA,IBA,IMP NAS,ISS IBA,IMP IBA,I…	Exoc6b,Farp1,Ro60,Ntn1,Gclm,Cdk5r2,Gosr1,Lsp1,Pcgf2,Ndn,Fas,Kif5c,Ptpn11,Crkl,Pkm,Opa1,Timm10,Tuba4a,Cdh10,Prkcz,Anxa7,Dok7,Pip4p1,Slc25a31,Myo16,Lrrk2,Abcg1,Isy1,Dusp23,Mtss2,Ranbp10,Cyfip1,Actn1,Gtf2a2,Atcay,Ttc12,Tctn1,Tsku,Gatad2a,Ablim1,Znfx1,Tcf25,Rttn,Tapbpl,Bloc1s4,Chchd6,Brk1,Cbr4,Dtnbp1,Gorasp1,Srgap2,Med28,Sh3bp4,Prpf3,Neurl1a,Smc6,Atad3a,Eps8l2,Stk24,Chmp3,Fmc1,Chodl,Tbcb,Atp5f1d,Clvs…	0.014
15	query_1	TRUE	0.0230917	1201	193	27	0.139896	0.0224813	GO:0048666	GO:BP	neuron development	21165	12757	GO:0030182, GO:0048468	ISS ISO,IDA IMP ISO IBA,IBA,IMP,ISO,IMP IBA,IMP,IGI,ISO,IGI,IDA IBA,IGI ISS ISO,IMP ISS ISO IBA,IDA ISO,IMP,IMP,IDA,NAS,IDA IMP ISS ISO IBA NAS,ISS ISO,IMP,IDA,ISO,IGI IBA,IMP,ISO,IMP IBA	Farp1,Ntn1,Cdk5r2,Ndn,Fas,Kif5c,Ptpn11,Crkl,Opa1,Prkcz,Myo16,Lrrk2,Cyfip1,Atcay,Tctn1,Tsku,Ablim1,Bloc1s4,Dtnbp1,Gorasp1,Srgap2,Neurl1a,Stk24,Chodl,Efhd1,Slc23a2,Ulk2	0.022
16	query_1	TRUE	0.0252332	1207	193	27	0.139896	0.0223695	GO:0045184	GO:BP	establishment of protein localization	21165	11159	GO:0008104, GO:0051234	IDA ISO IBA,IDA ISS IBA,TAS,ISS ISO,IMP,ISS,IDA IBA,IMP ISO,ISO,IMP IGI,IMP,IDA IMP,ISO,ISS,IBA,IMP,ISS,IBA,IBA,IBA,IBA,IBA,ISS,IBA,IMP,IDA,IGI	Kpna4,Kpna6,Ap2a2,Kif5c,Ptpn11,Cd81,Timm10,Cacna1c,Prkcz,Anxa7,Nr1d1,Lrrk2,Abcg1,Ripor1,Srp68,Dtnbp1,Gorasp1,Grpel1,Zdhhc6,Chmp3,Immp1l,Tomm34,Cmtm6,Golga7b,Selenok,Timm9,Bnip3l	0.022
17	query_1	TRUE	0.0282471	3037	193	50	0.259067	0.0164636	GO:0006950	GO:BP	response to stress	21165	2571	GO:0050896	IMP IBA,IMP ISS ISO,IMP,IMP,IMP,IMP,IMP ISS ISO,IMP,IDA,ISO IBA,IDA IMP,IMP,IMP,IEP,IMP,IMP IGI IBA,IMP,ISO,IMP,ISS,IMP IBA,IMP,ISO,ISS ISO,ISS,ISS,ISS,IDA IBA,IMP ISS IBA NAS,IMP,IMP ISS,IMP ISS,IBA,IMP,ISS IBA,IMP,ISS IBA,ISS,ISS ISO,ISO,IBA,ISS,IMP ISS,IMP,IDA IBA,ISO NAS,IBA,NAS,ISO,ISS ISO IBA	Wdfy1,Gclm,Ddt,Kpna4,Kpna6,Pld3,Mb,Lsp1,Pcgf2,Fas,Ptpn6,Ptpn11,Cd81,Acvr1,Nek1,Tyro3,Opa1,Adcyap1r1,Anxa7,Pip4p1,Tmem109,Nr1d1,Lrrk2,Crhbp,Ripor1,Pdk1,Serinc5,Gbp9,Casp9,Tsku,Znfx1,Tmx1,Gtf2h3,Bloc1s4,Chchd6,Dtnbp1,Smc6,Atad3a,Stk24,Chmp3,Rpa3,Efhd1,Map3k20,Selenok,Ulk2,Morf4l2,Ccs,Smarcb1,Ehmt2,Bnip3l	0.016
18	query_1	TRUE	0.0319937	18	193	4	0.0207254	0.222222	GO:1903911	GO:BP	positive regulation of receptor clustering	21165	23031	GO:0043113, GO:1903909, GO:1905477	IGI,IMP ISS,IDA IMP IGI,IDA IMP IGI	Farp1,Cd81,Crkl,Dok7	0.222
19	query_1	TRUE	0.0335657	61	193	6	0.0310881	0.0983607	GO:0006626	GO:BP	protein targeting to mitochondrion	21165	2332	GO:0006605, GO:0072655	IDA IBA,IBA,IBA,IBA,IDA,IGI	Timm10,Grpel1,Immp1l,Tomm34,Timm9,Bnip3l	0.098
20	query_1	TRUE	0.0355345	2307	193	41	0.212435	0.017772	GO:0033036	GO:BP	macromolecule localization	21165	7939	GO:0051179	IGI,IDA ISO IBA,IDA ISS IBA,IMP IBA,TAS,IMP ISS ISO,IMP,IMP ISS,IDA IMP IGI,IDA IBA,IMP ISO,IMP ISO,IMP IGI,IDA IMP IGI,IMP,IDA IMP,IDA IMP ISS ISO IBA,ISS,ISS,IBA,ISO,IMP IBA,IMP,ISO,IBA,ISO IBA,IMP,ISS,ISS,IBA,IBA,IBA,IBA,IBA,ISS,IBA,IDA,IMP,IGI,IDA,IGI	Farp1,Kpna4,Kpna6,Pomc,Ap2a2,Kif5c,Ptpn11,Cd81,Crkl,Timm10,Cacna1c,Prkcz,Anxa7,Dok7,Nr1d1,Lrrk2,Abcg1,Ripor1,Atcay,Srp68,Neto2,Tctn1,Tsku,Ubac2,Gle1,Slco3a1,Dtnbp1,Gorasp1,Sh3bp4,Grpel1,Zdhhc6,Chmp3,Immp1l,Tomm34,Cmtm6,Golga7b,Crot,Selenok,Ulk2,Timm9,Bnip3l	0.018
21	query_1	TRUE	0.0487197	96	193	7	0.0362694	0.0729167	GO:0007006	GO:BP	mitochondrial membrane organization	21165	2605	GO:0007005, GO:0061024	IDA IMP ISS,IDA IBA,IMP IBA,ISS IBA,IMP,IDA,ISO IBA	Opa1,Timm10,Slc25a31,Chchd6,Cln8,Timm9,Bnip3l	0.073
22	query_1	TRUE	6.99e-17	8807	193	143	0.740933	0.0162371	GO:0005737	GO:CC	cytoplasm	20820	304	GO:0005622, GO:0110165	ISS,ISO,IBA NAS,ISO IBA,IDA IBA,ISS ISO,IDA,IDA,IDA ISO IBA,NAS,NAS,IDA ISS TAS,IDA ISO IBA,IBA TAS,IBA,IDA ISO IBA,IDA IBA,ISS,IDA HDA ISS ISO IBA,ISO IBA,ISO IBA,IDA ISO IBA TAS NAS,IDA IBA,IDA,ISO,IDA ISO,IDA IBA TAS,IDA ISO IBA,ISS IBA TAS,IBA,IBA TAS,ISS IBA,ISO,IDA HDA IBA,ISS ISO,HDA,HDA ISS NAS,IDA IMP HDA ISS ISO IBA,IDA HDA IBA,ISO IBA TAS,IBA,ISO,IDA ISO IBA IC,IDA,IDA ISO,IDA ISO,IDA …	Dhtkd1,Fbxl16,Exoc6b,Pigg,Wdfy1,Farp1,Ro60,Ntn1,Gclm,Kpna4,Kpna6,Pld3,Cdk5r2,Nmt2,Dhcr7,Gosr1,Pomc,Mb,Got2,Klk1,Klk1b22,Ap2a2,Tpi1,Ndn,Fas,Kif5c,Ptpn6,Prkar2b,Ptpn11,Por,Crkl,Impdh1,Nek1,Pkm,Tyro3,Acyp2,Mrps21,Opa1,Timm10,Prkacb,Tuba4a,Adcyap1r1,Nos3,Smad5,Cacna1c,Prkcz,Anxa7,Pip4p1,Tmem109,Arglu1,Prrc1,Nr1d1,Slc25a31,Myo16,Lrrk2,Arcn1,Crhbp,Abcg1,Ripor1,Dusp23,Mtss2,Myh14,Ranbp10,Cyfip1,Actn1,Pd…	0.016
23	query_1	TRUE	1.28e-16	12132	193	169	0.875648	0.0139301	GO:0005622	GO:CC	intracellular anatomical structure	20820	232	GO:0110165	ISS,ISO,IBA NAS,IBA,ISO IBA,IDA IBA,IBA,ISS ISO,IDA,IDA,IDA ISO IBA,IDA IBA NAS,IBA NAS,IDA ISS TAS,IDA ISO IBA,IBA TAS,IBA,IDA ISO IBA,IDA IBA,ISS,IDA HDA ISS ISO IBA,ISO IBA,ISO IBA,IDA ISO IBA TAS NAS,IDA IBA,IDA ISS IBA TAS,IDA IBA,ISO,IDA ISS ISO IBA TAS,IDA IBA TAS,IDA ISO IBA,ISS IBA TAS,IBA,IBA TAS,ISS IBA,IDA ISO,IDA HDA ISS IBA,ISS ISO,HDA,HDA ISS NAS,IDA IMP HDA ISS ISO IBA,IBA,IDA HDA…	Dhtkd1,Fbxl16,Exoc6b,Rsbn1l,Pigg,Wdfy1,Nfxl1,Farp1,Ro60,Ntn1,Gclm,Kpna4,Kpna6,Pld3,Cdk5r2,Nmt2,Dhcr7,Gosr1,Pomc,Mb,Got2,Klk1,Klk1b22,Ap2a2,Tpi1,Pcgf2,Ndn,Fas,Kif5c,Ptpn6,Prkar2b,Ptpn11,Por,Crkl,Impdh1,Nek1,Pkm,Tyro3,Acyp2,Mrps21,Opa1,Gmeb2,Timm10,Prkacb,Tuba4a,Adcyap1r1,Nos3,Hnrnph2,Smad5,Cacna1c,Prkcz,Anxa7,Pip4p1,Tmem109,Spout1,Arglu1,Prrc1,Nr1d1,Slc25a31,Klhdc2,Myo16,Lrrk2,Arcn1,Crhbp,Rai1,Abc…	0.014
24	query_1	TRUE	3.61e-10	10832	193	148	0.766839	0.0136632	GO:0043226	GO:CC	organelle	20820	1840	GO:0110165	ISS,IBA,ISO IBA,IDA IBA,IBA,IDA,IDA IBA NAS,IBA NAS,IDA ISS TAS,IBA,IDA ISO IBA,IDA IBA,IDA HDA ISS ISO IBA,ISO IBA,ISO IBA,IDA ISO IBA TAS NAS,IDA ISS IBA TAS,IDA IBA,ISO,IDA ISS IBA TAS,IDA,ISS,ISS,IDA ISO,IDA HDA ISS,ISS ISO,HDA,HDA ISS NAS,IDA IMP HDA ISS ISO IBA,IBA,IDA HDA IBA,IDA IBA,IBA,ISO,IDA ISO IBA,ISS ISO IBA,ISO,IDA IBA,IDA ISO,IDA IGI ISO,IDA IBA,IDA IBA,ISS ISO,ISS IBA,IBA,ISS,IDA…	Dhtkd1,Rsbn1l,Pigg,Wdfy1,Nfxl1,Ro60,Kpna4,Kpna6,Pld3,Dhcr7,Gosr1,Pomc,Got2,Klk1,Klk1b22,Ap2a2,Pcgf2,Ndn,Fas,Kif5c,Prkar2b,Ptpn11,Impdh1,Nek1,Pkm,Tyro3,Acyp2,Mrps21,Opa1,Gmeb2,Timm10,Prkacb,Tuba4a,Adcyap1r1,Nos3,Hnrnph2,Cdh10,Smad5,Cacna1c,Prkcz,Anxa7,Pip4p1,Tmem109,Spout1,Arglu1,Prrc1,Nr1d1,Slc25a31,Klhdc2,Myo16,Lrrk2,Arcn1,Crhbp,Rai1,Abcg1,Ripor1,Isy1,Mtss2,Myh14,Ranbp10,Actn1,Gtf2a2,Pdk1,Fam210…	0.014
25	query_1	TRUE	2.21e-09	16741	193	187	0.968912	0.0111702	GO:0110165	GO:CC	cellular anatomical structure	20820	3368	GO:0005575	IBA,ISS,ISO,IBA NAS,IBA,ISO IBA,IDA ISS IBA,ISA IBA,IDA IBA,IBA,IBA,ISS ISO,IDA,IDA HDA ISS ISO IBA TAS,IDA ISO IBA,IDA IBA,IDA IBA NAS,IBA NAS,IDA ISS TAS,IDA IEP ISO IBA,IBA TAS,IBA,IDA ISO IBA,IDA ISS ISO IBA TAS,ISS,IDA HDA ISS ISO IBA,ISO IBA,ISO IBA,IDA ISO IBA TAS NAS,IDA IBA,IDA ISS IBA TAS,IDA IBA,IDA ISO IBA,ISO,IDA ISS ISO IBA TAS,IDA ISO IBA TAS,IDA IMP ISO IBA,ISS ISO IBA TAS,IDA ISS…	Gm5938,Dhtkd1,Fbxl16,Exoc6b,Rsbn1l,Pigg,Pcdh10,Or51v14,Wdfy1,Cacna1i,Nfxl1,Farp1,Ro60,Ntn1,Gclm,Ddt,Kpna4,Kpna6,Pld3,Cdk5r2,Nmt2,Dhcr7,Gosr1,Pomc,Mb,Got2,Klk1,Klk1b22,Ap2a2,Tpi1,Pcgf2,Ndn,Fas,Klkb1,Kif5c,Ptpn6,Prkar2b,Ptpn11,Cd81,Por,Acvr1,Crkl,Impdh1,Nek1,Pkm,Tyro3,Acyp2,Mrps21,Opa1,Gmeb2,Timm10,Prkacb,Tuba4a,Adcyap1r1,Nos3,Hnrnph2,Cdh10,Smad5,Cacna1c,Prkcz,Anxa7,Dok7,Pip4p1,2510002D24Rik,Tmem10…	0.011
26	query_1	TRUE	1.61e-08	10425	193	141	0.73057	0.0135252	GO:0043229	GO:CC	intracellular organelle	20820	1843	GO:0005622, GO:0043226	ISS,IBA,ISO IBA,IDA IBA,IBA,IDA,IDA IBA NAS,IBA NAS,IDA ISS TAS,IBA,IDA ISO IBA,IDA IBA,IDA HDA ISS ISO IBA,ISO IBA,ISO IBA,IDA ISO IBA TAS NAS,IDA ISS IBA TAS,IDA IBA,ISO,IDA ISS IBA TAS,ISS,ISS,IDA ISO,IDA HDA ISS,ISS ISO,HDA,HDA ISS NAS,IDA IMP HDA ISS ISO IBA,IBA,IDA HDA IBA,IBA,IBA,ISO,IDA ISO IBA,ISS IBA,IDA IBA,IDA ISO,IDA IGI ISO,IDA IBA,IDA IBA,ISS ISO,ISS IBA,IBA,ISS,IDA IBA TAS,IMP HDA…	Dhtkd1,Rsbn1l,Pigg,Wdfy1,Nfxl1,Ro60,Kpna4,Kpna6,Pld3,Dhcr7,Gosr1,Pomc,Got2,Klk1,Klk1b22,Ap2a2,Pcgf2,Ndn,Fas,Kif5c,Ptpn11,Impdh1,Nek1,Pkm,Tyro3,Acyp2,Mrps21,Opa1,Gmeb2,Timm10,Prkacb,Tuba4a,Adcyap1r1,Nos3,Hnrnph2,Smad5,Cacna1c,Prkcz,Anxa7,Pip4p1,Tmem109,Spout1,Arglu1,Prrc1,Nr1d1,Slc25a31,Klhdc2,Myo16,Lrrk2,Arcn1,Crhbp,Rai1,Abcg1,Ripor1,Isy1,Mtss2,Myh14,Ranbp10,Actn1,Gtf2a2,Pdk1,Fam210a,Ptbp3,Atcay,…	0.014
27	query_1	TRUE	8.36e-08	4645	193	82	0.42487	0.0176534	GO:0032991	GO:CC	protein-containing complex	20820	1311	GO:0005575	IBA,IBA NAS,IBA,IDA ISS IBA,IDA ISO IBA,ISO,ISO,IBA,ISO,IDA ISO IBA NAS,IDA ISS IBA,IDA,IDA ISO IBA,ISS IBA TAS,IDA,IDA ISO IBA,ISO,ISO IBA,IDA,ISO,IBA,ISS NAS,IDA,ISO IBA TAS,ISO,ISO IBA,IBA,ISO IBA,IDA IMP ISS ISO IBA TAS,IMP,ISS,ISO IBA,IDA,IBA,ISS IBA,IDA IBA,IBA,ISO IBA,IDA ISO,IBA,ISS IBA,IDA IBA,IBA,ISS IBA NAS,ISO,IBA,IBA NAS,ISS IBA,IBA,ISS IBA,IBA,IDA IBA,IDA ISO IBA,IBA,ISS,IDA ISS ISO…	Fbxl16,Exoc6b,Cacna1i,Ro60,Gclm,Kpna4,Kpna6,Gosr1,Got2,Ap2a2,Pcgf2,Ndn,Fas,Kif5c,Ptpn6,Prkar2b,Ptpn11,Acvr1,Crkl,Pkm,Tyro3,Mrps21,Timm10,Prkacb,Adcyap1r1,Hnrnph2,Cdh10,Smad5,Cacna1c,Slc25a31,Klhdc2,Myo16,Lrrk2,Arcn1,Isy1,Myh14,Cyfip1,Gtf2a2,Pdk1,Srp68,Mon1b,Tctn1,Aqr,Gatad2a,Aldh1l1,Znfx1,Gle1,Tcf25,Tapbpl,Gtf2h3,Ubac1,Psmd2,Bloc1s4,Brk1,Cbr4,Dtnbp1,Med28,Gmppa,Prpf3,Smc6,Stk24,Grpel1,Rnps1,Chmp3…	0.018
28	query_1	TRUE	8.92e-08	9825	193	134	0.694301	0.0136387	GO:0043227	GO:CC	membrane-bounded organelle	20820	1841	GO:0043226	ISS,IBA,ISO IBA,IDA IBA,IBA,IDA,IDA IBA NAS,IBA NAS,IDA ISS TAS,IBA,IDA ISO IBA,IDA IBA,IDA HDA ISS ISO IBA,ISO IBA,ISO IBA,IDA ISO IBA TAS NAS,IDA ISS IBA TAS,IDA IBA,ISO,IDA,IDA,ISS,ISS,IDA ISO,IDA HDA ISS,ISS ISO,HDA,HDA ISS NAS,IDA IMP HDA ISS ISO IBA,IBA,IDA HDA IBA,IDA IBA,ISO,IDA ISO IBA,ISS IBA,IDA IBA,IDA,IDA IBA,IDA IBA,ISS ISO,IBA,ISS,IDA IBA TAS,IMP HDA,ISS,ISS ISO IBA,IDA,IDA IBA,IDA…	Dhtkd1,Rsbn1l,Pigg,Wdfy1,Nfxl1,Ro60,Kpna4,Kpna6,Pld3,Dhcr7,Gosr1,Pomc,Got2,Klk1,Klk1b22,Ap2a2,Pcgf2,Ndn,Fas,Kif5c,Prkar2b,Ptpn11,Impdh1,Nek1,Pkm,Tyro3,Acyp2,Mrps21,Opa1,Gmeb2,Timm10,Prkacb,Adcyap1r1,Nos3,Hnrnph2,Smad5,Prkcz,Anxa7,Pip4p1,Tmem109,Arglu1,Prrc1,Nr1d1,Slc25a31,Klhdc2,Myo16,Lrrk2,Arcn1,Crhbp,Rai1,Abcg1,Ripor1,Isy1,Actn1,Gtf2a2,Pdk1,Fam210a,Ptbp3,Atcay,Bmp3,Serinc5,Slc9a7,Srp68,Mon1b,Gb…	0.014
29	query_1	TRUE	1.52e-07	9333	193	129	0.668394	0.0138219	GO:0043231	GO:CC	intracellular membrane-bounded organelle	20820	1845	GO:0043227, GO:0043229	ISS,IBA,ISO IBA,IDA IBA,IBA,IDA,IDA IBA NAS,IBA NAS,IDA ISS TAS,IBA,IDA ISO IBA,IDA IBA,IDA HDA ISS ISO IBA,ISO IBA,ISO IBA,IDA ISO IBA TAS NAS,IDA ISS IBA TAS,IDA IBA,ISO,ISS,ISS,IDA ISO,IDA HDA ISS,ISS ISO,HDA,HDA ISS NAS,IDA IMP HDA ISS ISO IBA,IBA,IDA HDA IBA,IBA,ISO,IDA ISO IBA,ISS IBA,IDA IBA,IDA,IDA IBA,IDA IBA,ISS ISO,IBA,ISS,IDA IBA TAS,IMP HDA,ISS,ISS ISO IBA,IDA,IDA IBA,IDA ISS ISO,IDA…	Dhtkd1,Rsbn1l,Pigg,Wdfy1,Nfxl1,Ro60,Kpna4,Kpna6,Pld3,Dhcr7,Gosr1,Pomc,Got2,Klk1,Klk1b22,Ap2a2,Pcgf2,Ndn,Fas,Ptpn11,Impdh1,Nek1,Pkm,Tyro3,Acyp2,Mrps21,Opa1,Gmeb2,Timm10,Prkacb,Adcyap1r1,Nos3,Hnrnph2,Smad5,Prkcz,Anxa7,Pip4p1,Tmem109,Arglu1,Prrc1,Nr1d1,Slc25a31,Klhdc2,Myo16,Lrrk2,Arcn1,Crhbp,Rai1,Abcg1,Ripor1,Isy1,Actn1,Gtf2a2,Pdk1,Fam210a,Ptbp3,Atcay,Serinc5,Slc9a7,Srp68,Mon1b,Gbp9,Casp9,Aqr,Gatad2…	0.014
30	query_1	TRUE	8.17e-06	1548	193	38	0.196891	0.0245478	GO:0005739	GO:CC	mitochondrion	20820	305	GO:0005737, GO:0043231	ISS,IDA HDA ISS ISO IBA,HDA,HDA,HDA ISS NAS,IDA IMP HDA ISS ISO IBA,IDA HDA IBA,IBA,IMP HDA,IDA,HDA IBA,IDA HDA IBA,IDA,ISS IBA,HDA,IDA,ISS IBA,HDA ISS,HDA,IDA HDA IBA,IDA,HDA IBA,IDA IBA,HDA IBA,HDA IBA NAS,HDA IBA,HDA ISS IBA NAS,HDA IBA,HDA ISS IBA,HDA ISS IBA NAS,HDA ISO,IDA HDA IBA,IDA HDA ISO,HDA IBA,HDA,TAS,IDA HDA,IDA HDA ISS IBA	Dhtkd1,Got2,Pkm,Acyp2,Mrps21,Opa1,Timm10,Arglu1,Slc25a31,Lrrk2,Pdk1,Fam210a,Atcay,Cmc2,Aldh1l1,Znfx1,Chchd6,Cbr4,Srgap2,Atad3a,Dhrs4,Grpel1,Immp1l,Fmc1,Gadd45gip1,Ears2,Mrps28,Tomm34,Wars2,Mrpl19,Atp5f1d,Efhd1,Ndufb8,Bola1,Crot,Ccs,Timm9,Bnip3l	0.025
31	query_1	TRUE	1.15e-05	929	193	28	0.145078	0.0301399	GO:0031967	GO:CC	organelle envelope	20820	1187	GO:0043227, GO:0043229, GO:0110165	HDA ISO,ISS ISO,HDA NAS,IDA IMP HDA ISS ISO IBA,IDA IBA,IDA,IDA,ISO,IMP HDA,IDA,IDA,IDA,ISO IBA NAS,ISS,HDA,HDA,IBA,ISO,IBA,NAS,NAS,NAS,HDA ISO,IDA IBA,HDA ISO,TAS,IDA,ISS IBA	Got2,Tyro3,Mrps21,Opa1,Timm10,Prkcz,Anxa7,Tmem109,Slc25a31,Lrrk2,Atcay,Znfx1,Gle1,Chchd6,Srgap2,Atad3a,Grpel1,Chmp3,Immp1l,Gadd45gip1,Mrps28,Mrpl19,Atp5f1d,Efhd1,Ndufb8,Ccs,Timm9,Bnip3l	0.03
32	query_1	TRUE	5.11e-05	648	193	22	0.11399	0.0339506	GO:0005740	GO:CC	mitochondrial envelope	20820	306	GO:0005739, GO:0031967	HDA ISO,HDA NAS,IDA IMP HDA ISS ISO IBA,IDA IBA,IMP HDA,IDA,IDA,IDA,ISS,HDA,HDA,IBA,IBA,NAS,NAS,NAS,HDA ISO,IDA IBA,HDA ISO,TAS,IDA,ISS IBA	Got2,Mrps21,Opa1,Timm10,Slc25a31,Lrrk2,Atcay,Znfx1,Chchd6,Srgap2,Atad3a,Grpel1,Immp1l,Gadd45gip1,Mrps28,Mrpl19,Atp5f1d,Efhd1,Ndufb8,Ccs,Timm9,Bnip3l	0.034
33	query_1	TRUE	0.000236452	439	193	17	0.0880829	0.0387244	GO:0005743	GO:CC	mitochondrial inner membrane	20820	309	GO:0019866, GO:0031966	HDA ISO,HDA NAS,IDA IMP HDA ISS ISO,IBA,HDA,IDA,ISS,HDA,HDA,IBA,IBA,NAS,NAS,NAS,HDA ISO,IDA IBA,HDA ISO	Got2,Mrps21,Opa1,Timm10,Slc25a31,Lrrk2,Chchd6,Srgap2,Atad3a,Grpel1,Immp1l,Gadd45gip1,Mrps28,Mrpl19,Atp5f1d,Efhd1,Ndufb8	0.039
34	query_1	TRUE	0.000243954	598	193	20	0.103627	0.0334448	GO:0031966	GO:CC	mitochondrial membrane	20820	1186	GO:0005740, GO:0031090	HDA ISO,HDA NAS,IDA IMP HDA ISS ISO IBA,IBA,HDA,IDA,IDA,IDA,ISS,HDA,HDA,IBA,IBA,NAS,NAS,NAS,HDA ISO,IDA IBA,HDA ISO,ISS IBA	Got2,Mrps21,Opa1,Timm10,Slc25a31,Lrrk2,Atcay,Znfx1,Chchd6,Srgap2,Atad3a,Grpel1,Immp1l,Gadd45gip1,Mrps28,Mrpl19,Atp5f1d,Efhd1,Ndufb8,Bnip3l	0.033
35	query_1	TRUE	0.000438867	2112	193	42	0.217617	0.0198864	GO:0031090	GO:CC	organelle membrane	20820	1017	GO:0016020, GO:0043227	IBA,IDA ISS TAS,IBA,IDA IBA,HDA ISO,IDA ISO IBA NAS,ISS ISO,HDA NAS,IDA IMP HDA ISS ISO IBA,IBA,IBA,IDA IBA,ISS ISO,HDA,IDA,IBA,TAS,IDA,ISS,IDA,ISS,IBA,ISS,IDA ISS ISO IBA,HDA,HDA,ISS ISO,ISO,IBA,ISO IBA,IBA,NAS,NAS,ISS,NAS,HDA ISO,IDA IBA,HDA ISO,NAS,ISO,IDA ISO IBA,ISS IBA	Pigg,Pld3,Dhcr7,Gosr1,Got2,Ap2a2,Tyro3,Mrps21,Opa1,Timm10,Anxa7,Pip4p1,Tmem109,Slc25a31,Lrrk2,Arcn1,Actn1,Atcay,Slc9a7,Znfx1,Tmx1,Tapbpl,Chchd6,Dtnbp1,Srgap2,Atad3a,Plpp3,Stk24,Grpel1,Chmp3,Immp1l,Gadd45gip1,Mrps28,Cmtm6,Mrpl19,Atp5f1d,Efhd1,Ndufb8,Borcs8,Appbp2,Selenok,Bnip3l	0.02
36	query_1	TRUE	0.000617095	471	193	17	0.0880829	0.0360934	GO:0019866	GO:CC	organelle inner membrane	20820	800	GO:0031090, GO:0031967	HDA ISO,HDA NAS,IDA IMP HDA ISS ISO,IBA,HDA,IDA,ISS,HDA,HDA,IBA,IBA,NAS,NAS,NAS,HDA ISO,IDA IBA,HDA ISO	Got2,Mrps21,Opa1,Timm10,Slc25a31,Lrrk2,Chchd6,Srgap2,Atad3a,Grpel1,Immp1l,Gadd45gip1,Mrps28,Mrpl19,Atp5f1d,Efhd1,Ndufb8	0.036
37	query_1	TRUE	0.00428493	154	193	9	0.0466321	0.0584416	GO:0098798	GO:CC	mitochondrial protein-containing complex	20820	3190	GO:0005739, GO:0032991	ISS NAS,IDA,IMP,IBA,IBA,NAS,ISS IBA NAS,ISS IBA NAS,IDA	Mrps21,Timm10,Slc25a31,Grpel1,Immp1l,Gadd45gip1,Mrps28,Mrpl19,Timm9	0.058
38	query_1	TRUE	0.0074653	1438	193	30	0.15544	0.0208623	GO:1902494	GO:CC	catalytic complex	20820	3602	GO:0032991	IBA,IDA ISO IBA,IDA ISS IBA,IDA ISO IBA,ISO,ISO,ISO IBA TAS,ISS,ISS IBA,ISO IBA,IDA ISO,IBA,ISS IBA NAS,IBA,ISS IBA,IBA,IDA IBA,ISS,ISS,IDA ISS IBA,IBA,ISS IBA,ISS,ISS ISO,IBA,IBA,ISS IBA,IMP,ISO IBA,IDA ISO IBA NAS	Fbxl16,Gclm,Pcgf2,Prkar2b,Acvr1,Pkm,Prkacb,Klhdc2,Isy1,Gtf2a2,Pdk1,Aqr,Gatad2a,Znfx1,Gtf2h3,Ubac1,Psmd2,Cbr4,Gmppa,Smc6,Immp1l,Lage3,Naa38,Atp5f1d,Golga7b,Ndufb8,Appbp2,Plod1,Morf4l2,Smarcb1	0.021
39	query_1	TRUE	0.0318485	836	193	20	0.103627	0.0239234	GO:0098794	GO:CC	postsynapse	20820	3187	GO:0045202, GO:0110165	IDA,ISO,ISO,IDA IMP ISO,IDA,ISO,ISO,ISO,ISO,IDA,IDA,IDA ISO,ISO,IDA IEP ISO IBA,IDA IEP IBA,IDA IEP,IDA ISO,IDA ISS,IDA IEP IBA,IDA	Pcdh10,Farp1,Kif5c,Prkar2b,Crkl,Hnrnph2,Cdh10,Cacna1c,Prkcz,Dok7,Nr1d1,Cyfip1,Actn1,Dlgap2,Neto2,Ablim1,Dtnbp1,Srgap2,Neurl1a,Pfn2	0.024
40	query_1	TRUE	0.0469352	2992	193	47	0.243523	0.0157086	GO:0012505	GO:CC	endomembrane system	20820	666	GO:0110165	ISO IBA,IDA IBA,IDA ISS TAS,IBA,IDA ISO IBA,IDA IBA,ISO IBA,ISO IBA,IDA ISO IBA TAS NAS,ISO,IDA,ISS ISO,ISO,IDA,IDA,IDA IBA,ISS ISO,ISS,IDA,IDA IBA,ISS ISO,IDA,ISS,TAS NAS,IDA,ISS IBA,ISS IBA,ISO,ISO IBA NAS,ISS IBA,IBA,IDA ISS ISO IBA,IDA IBA,ISS ISO,ISO IBA,ISS IBA,ISO IBA,ISS,ISS ISO IBA,IBA,IDA,IBA,IDA ISO IBA,IDA ISS IBA,IBA,ISS IBA,IBA	Pigg,Wdfy1,Pld3,Dhcr7,Gosr1,Pomc,Klk1,Klk1b22,Ap2a2,Fas,Pkm,Tyro3,Adcyap1r1,Prkcz,Anxa7,Pip4p1,Tmem109,Prrc1,Lrrk2,Arcn1,Crhbp,Abcg1,Ripor1,Actn1,Serinc5,Slc9a7,Mon1b,Ubac2,Gle1,Tmx1,Tapbpl,Dtnbp1,Gorasp1,Plpp3,Stk24,Zdhhc6,Chmp3,Cmtm6,Clvs1,Dennd6b,Prxl2b,Syt13,Selenok,Cln8,Plod1,Srd5a3,Bnip3l	0.016
41	query_1	TRUE	0.00252071	11009	181	127	0.701657	0.011536	GO:0005488	GO:MF	binding	20512	1450	GO:0003674	IBA,IPI,IBA,IGI ISS ISO IBA,IDA ISO IBA,IPI,IDA IPI ISS ISO,IPI,IPI IBA,IPI IBA,IPI IBA TAS,ISS,IDA IPI ISS IBA,ISO IBA,ISO,IPI,IPI ISO,IPI ISS,TAS,IDA IPI IBA,IDA IPI,IDA IPI ISS ISO,IPI ISO IBA,IDA IPI ISO IBA,IPI ISO IBA,IPI ISO IBA,IPI ISS,ISO IBA,IDA IPI IBA,IPI ISO IBA,ISS,IDA,IDA IPI ISS ISO,IPI ISS ISO,IPI ISS ISO IBA,IBA,IDA,IPI IBA,IPI ISO IBA,IPI ISO IBA,IBA,IBA,IDA IPI IBA,IPI ISS ISO…	Gm5938,Wdfy1,Nfxl1,Farp1,Ro60,Ntn1,Gclm,Ddt,Kpna4,Kpna6,Cdk5r2,Dhcr7,Pomc,Mb,Got2,Cd44,Ap2a2,Tpi1,Lsp1,Pcgf2,Ndn,Fas,Kif5c,Ptpn6,Prkar2b,Ptpn11,Cd81,Por,Acvr1,Crkl,Impdh1,Nek1,Pkm,Tyro3,Opa1,Gmeb2,Prkacb,Tuba4a,Adcyap1r1,Nos3,Hnrnph2,Cdh10,Smad5,Cacna1c,Prkcz,Anxa7,Dok7,Pip4p1,2510002D24Rik,Tmem109,Spout1,Prrc1,Nr1d1,Gpr149,Klhdc2,Myo16,Lrrk2,Crhbp,Abcg1,Ripor1,Mtss2,Myh14,Ranbp10,Cyfip1,Fbxo11,A…	0.012
42	query_1	TRUE	0.00262189	1027	181	25	0.138122	0.0243427	GO:0043168	GO:MF	anion binding	20512	5225	GO:0043167	IGI ISS ISO IBA,ISO,ISO IBA,ISO IBA,ISO,ISS,IDA,IBA,IBA,ISO,IDA,IDA,IDA,ISO,IBA,ISO,IBA,ISS,ISS,IBA,ISO,ISS,ISS,IDA,ISO	Farp1,Got2,Prkar2b,Por,Pkm,Opa1,Prkacb,Tuba4a,Nos3,Lrrk2,Mtss2,Myh14,Ranbp10,Pdk1,Gbp9,Dpyd,Gle1,Cbr4,Sh3bp4,Grpel1,Chmp3,Clvs1,Dennd6b,Map3k20,Plod1	0.024
43	query_1	TRUE	0.00337572	7643	181	97	0.535912	0.0126914	GO:0005515	GO:MF	protein binding	20512	1462	GO:0005488	IPI,ISO,IPI,IDA IPI ISS ISO,IPI,IPI,IPI,IPI IBA TAS,IDA IPI ISS IBA,ISO,IPI,IPI ISO,IPI ISS,TAS,IPI,IDA IPI,IDA IPI ISS ISO,IPI ISO IBA,IDA IPI ISO IBA,IPI ISO IBA,IPI ISO IBA,IPI ISS,ISO,IDA IPI IBA,IPI ISO IBA,IDA,IPI ISS ISO,IPI ISS ISO,IPI ISO IBA,IPI,IPI ISO,IPI ISO,IBA,IPI IBA,IPI ISS ISO,IPI ISO,IPI,IDA IPI IBA,IPI,IPI,IPI,IBA,IPI ISS,IPI,IPI ISS ISO IBA,IPI,ISS,ISS,IDA IBA,IDA IBA,IDA IPI…	Wdfy1,Farp1,Ntn1,Gclm,Ddt,Kpna4,Kpna6,Cdk5r2,Pomc,Got2,Cd44,Ap2a2,Tpi1,Lsp1,Pcgf2,Ndn,Fas,Kif5c,Ptpn6,Prkar2b,Ptpn11,Cd81,Por,Acvr1,Crkl,Nek1,Pkm,Tyro3,Opa1,Tuba4a,Adcyap1r1,Nos3,Cdh10,Smad5,Cacna1c,Prkcz,Anxa7,Dok7,Pip4p1,2510002D24Rik,Tmem109,Prrc1,Nr1d1,Klhdc2,Myo16,Lrrk2,Abcg1,Ripor1,Mtss2,Myh14,Ranbp10,Cyfip1,Fbxo11,Actn1,Gtf2a2,Pdk1,Bmp3,Dlgap2,Neto2,Tctn1,Casp9,Tsku,Dpyd,Ablim1,Aldh1l1,Uba…	0.013
44	query_1	TRUE	0.00483186	1351	181	29	0.160221	0.0214656	GO:0019899	GO:MF	enzyme binding	20512	3492	GO:0005515	ISO,IDA ISS ISO,IPI,IBA,ISO,IPI ISO,ISO,IPI IBA,IPI ISO IBA,ISO,IBA,ISO,IPI,ISO,ISO,IPI ISO,ISO,IDA IBA,ISO IBA,IPI,IDA,IPI,ISS,ISS,IDA,ISO,IPI,ISO,ISO	Farp1,Gclm,Ddt,Cdk5r2,Got2,Ap2a2,Fas,Prkar2b,Ptpn11,Por,Crkl,Opa1,Tuba4a,Adcyap1r1,Nos3,Cacna1c,Prkcz,Dok7,Myo16,Lrrk2,Mtss2,Ranbp10,Cyfip1,Casp9,Srgap2,Grpel1,Golga7b,Ccs,Ehmt2	0.021
45	query_1	TRUE	0.0235607	884	181	21	0.116022	0.0237557	GO:1901363	GO:MF	heterocyclic compound binding	20512	9876	GO:0036094	IGI ISS ISO IBA,ISS,ISO,ISO IBA,ISO IBA,ISO,IDA,IBA,IBA,ISO,IDA,IDA,ISO,IBA,ISO IBA,ISS,ISS,IBA,ISS,IDA,ISO	Farp1,Dhcr7,Got2,Prkar2b,Por,Pkm,Prkacb,Tuba4a,Nos3,Lrrk2,Myh14,Ranbp10,Pdk1,Gbp9,Dpyd,Cbr4,Sh3bp4,Grpel1,Dennd6b,Map3k20,Plod1	0.024
46	query_1	TRUE	0.0266464	690	181	18	0.0994475	0.026087	GO:0017076	GO:MF	purine nucleotide binding	20512	3071	GO:0000166	IGI ISS ISO IBA,ISS,ISO IBA,ISO,ISO,IDA,IBA,ISO,IDA,IDA,ISO,IBA,ISO IBA,ISS,ISS,IBA,ISS,IDA	Farp1,Dhcr7,Prkar2b,Por,Pkm,Prkacb,Tuba4a,Lrrk2,Myh14,Ranbp10,Pdk1,Gbp9,Dpyd,Cbr4,Sh3bp4,Grpel1,Dennd6b,Map3k20	0.026
47	query_1	TRUE	0.0372837	775	181	19	0.104972	0.0245161	GO:0000166	GO:MF	nucleotide binding	20512	31	GO:1901265, GO:1901363	IGI ISS ISO IBA,ISS,ISO IBA,ISO IBA,ISO,IDA,IBA,IBA,ISO,IDA,IDA,ISO,IBA,ISO IBA,ISS,ISS,IBA,ISS,IDA	Farp1,Dhcr7,Prkar2b,Por,Pkm,Prkacb,Tuba4a,Nos3,Lrrk2,Myh14,Ranbp10,Pdk1,Gbp9,Dpyd,Cbr4,Sh3bp4,Grpel1,Dennd6b,Map3k20	0.025
48	query_1	TRUE	0.04964	2	181	2	0.0110497	1	GO:0140523	GO:MF	GTPase-dependent fusogenic activity	20512	9414	GO:0003924, GO:0140522	IDA ISS,IMP ISO	Opa1,Anxa7	1
49	query_1	TRUE	0.04964	2	181	2	0.0110497	1	GO:0140522	GO:MF	fusogenic activity	20512	9413	GO:0003674	IDA ISS,IMP ISO	Opa1,Anxa7	1
50	query_1	TRUE	0.0496749	792	181	19	0.104972	0.0239899	GO:1901265	GO:MF	nucleoside phosphate binding	20512	9873	GO:0005488	IGI ISS ISO IBA,ISS,ISO IBA,ISO IBA,ISO,IDA,IBA,IBA,ISO,IDA,IDA,ISO,IBA,ISO IBA,ISS,ISS,IBA,ISS,IDA	Farp1,Dhcr7,Prkar2b,Por,Pkm,Prkacb,Tuba4a,Nos3,Lrrk2,Myh14,Ranbp10,Pdk1,Gbp9,Dpyd,Cbr4,Sh3bp4,Grpel1,Dennd6b,Map3k20	0.024
51	query_1	TRUE	0.00744575	1541	73	40	0.547945	0.0259572	HP:0001760	HP	Abnormal foot morphology	5228	1273	HP:0002814	HP,HP,HP,HP,HP,HP,HP,HP,HP,HP,HP,HP,HP,HP,HP,HP,HP,HP,HP,HP,HP,HP,HP,HP,HP,HP,HP,HP,HP,HP,HP,HP,HP,HP,HP,HP,HP,HP,HP,HP	Dhtkd1,Exoc6b,Pigg,Dhcr7,Enpp1,Pcgf2,Ndn,Kif5c,Por,Acvr1,Crkl,Nek1,Opa1,Prkacb,Hnrnph2,Erf,Sms,Cacna1c,Prkcz,Dlk1,Dok7,Arcn1,Rai1,Myh14,Fbxo11,Ano10,Atcay,Slc9a7,Rab3gap2,Tctn1,Gle1,Rttn,Gmppa,Atad3a,Mrps28,Wars2,Atp5f1d,Map3k20,Plod1,Srd5a3	0.026
52	query_1	TRUE	4.2e-12	10647	217	163	0.751152	0.0153095	TF:M10209_1	TF	Factor: E2F-1; motif: GNGGGCGGGRMN; match class: 1	21700	745	TF:M10209	TF,TF,TF,TF,TF,TF,TF,TF,TF,TF,TF,TF,TF,TF,TF,TF,TF,TF,TF,TF,TF,TF,TF,TF,TF,TF,TF,TF,TF,TF,TF,TF,TF,TF,TF,TF,TF,TF,TF,TF,TF,TF,TF,TF,TF,TF,TF,TF,TF,TF,TF,TF,TF,TF,TF,TF,TF,TF,TF,TF,TF,TF,TF,TF,TF,TF,TF,TF,TF,TF,TF,TF,TF,TF,TF,TF,TF,TF,TF,TF,TF,TF,TF,TF,TF,TF,TF,TF,TF,TF,TF,TF,TF,TF,TF,TF,TF,TF,TF,TF,TF,TF,TF,TF,TF,TF,TF,TF,TF,TF,TF,TF,TF,TF,TF,TF,TF,TF,TF,TF,TF,TF,TF,TF,TF,TF,TF,TF,TF,TF,TF,TF,TF,…	Dhtkd1,Tmem74b,Fbxl16,Exoc6b,Ccdc6,Rsbn1l,Pigg,Wdfy1,Cacna1i,Nfxl1,Farp1,Ro60,Ntn1,Gclm,Ddt,Kpna4,Pld3,Cdk5r2,Nmt2,Dhcr7,Enpp1,Ap2a2,Tpi1,Pcgf2,Fas,Kif5c,Prkar2b,Ptpn11,Cd81,Por,Acvr1,Impdh1,Nek1,Pkm,Golga3,Opa1,Gmeb2,Timm10,Prkacb,Tuba4a,Adcyap1r1,Erf,Sms,Smad5,Cacna1c,Prkcz,Dlk1,2300009A05Rik,Dok7,Pip4p1,Arglu1,Slc25a31,Samd5,Klhdc2,Myo16,Lrrk2,Arcn1,Crhbp,Rai1,Abcg1,Grm4,Ripor1,Arhgap23,Dusp23…	0.015
53	query_1	TRUE	4.38e-12	10434	217	161	0.741935	0.0154303	TF:M00803	TF	Factor: E2F; motif: GGCGSG	21700	790	TF:M00000	TF,TF,TF,TF,TF,TF,TF,TF,TF,TF,TF,TF,TF,TF,TF,TF,TF,TF,TF,TF,TF,TF,TF,TF,TF,TF,TF,TF,TF,TF,TF,TF,TF,TF,TF,TF,TF,TF,TF,TF,TF,TF,TF,TF,TF,TF,TF,TF,TF,TF,TF,TF,TF,TF,TF,TF,TF,TF,TF,TF,TF,TF,TF,TF,TF,TF,TF,TF,TF,TF,TF,TF,TF,TF,TF,TF,TF,TF,TF,TF,TF,TF,TF,TF,TF,TF,TF,TF,TF,TF,TF,TF,TF,TF,TF,TF,TF,TF,TF,TF,TF,TF,TF,TF,TF,TF,TF,TF,TF,TF,TF,TF,TF,TF,TF,TF,TF,TF,TF,TF,TF,TF,TF,TF,TF,TF,TF,TF,TF,TF,TF,TF,TF,…	Dhtkd1,Tmem74b,Fbxl16,Exoc6b,Ccdc6,Rsbn1l,Pcdh10,Wdfy1,Cacna1i,Nfxl1,Farp1,Ro60,Ntn1,Gclm,Ddt,Kpna4,Pld3,Cdk5r2,Nmt2,Dhcr7,Got2,Enpp1,Cd44,Ap2a2,Tpi1,Pcgf2,Kif5c,Ptpn6,Prkar2b,Ptpn11,Cd81,Acvr1,Crkl,Nek1,Pkm,Golga3,Acyp2,Gmeb2,Timm10,Prkacb,Tuba4a,Adcyap1r1,Hnrnph2,Erf,Sms,Smad5,Cacna1c,Prkcz,Anxa7,Dlk1,2300009A05Rik,Dok7,Pip4p1,2510002D24Rik,Tmem109,Spout1,Arglu1,Prrc1,Slc25a31,Samd5,Klhdc2,Myo1…	0.015
54	query_1	TRUE	8.22e-12	12793	217	181	0.834101	0.0141484	TF:M04662_1	TF	Factor: FOXN4; motif: NNWANNCGWMCGCGTCNNNNMT; match class: 1	21700	1181	TF:M04662	TF,TF,TF,TF,TF,TF,TF,TF,TF,TF,TF,TF,TF,TF,TF,TF,TF,TF,TF,TF,TF,TF,TF,TF,TF,TF,TF,TF,TF,TF,TF,TF,TF,TF,TF,TF,TF,TF,TF,TF,TF,TF,TF,TF,TF,TF,TF,TF,TF,TF,TF,TF,TF,TF,TF,TF,TF,TF,TF,TF,TF,TF,TF,TF,TF,TF,TF,TF,TF,TF,TF,TF,TF,TF,TF,TF,TF,TF,TF,TF,TF,TF,TF,TF,TF,TF,TF,TF,TF,TF,TF,TF,TF,TF,TF,TF,TF,TF,TF,TF,TF,TF,TF,TF,TF,TF,TF,TF,TF,TF,TF,TF,TF,TF,TF,TF,TF,TF,TF,TF,TF,TF,TF,TF,TF,TF,TF,TF,TF,TF,TF,TF,TF,…	Dhtkd1,Tmem74b,Fbxl16,Exoc6b,Ccdc6,Rsbn1l,Pigg,Pcdh10,Wdfy1,Cacna1i,Nfxl1,Farp1,Ro60,Ntn1,Gclm,Ddt,Kpna4,Kpna6,Cdk5r2,Nmt2,Dhcr7,Pomc,Got2,Enpp1,Cd44,Ap2a2,Pcgf2,Fas,Kif5c,Prkar2b,Ptpn11,Cd81,Por,Acvr1,Crkl,Impdh1,Nek1,Pkm,Golga3,Mrps21,Gmeb2,Timm10,Prkacb,Tuba4a,Adcyap1r1,Hnrnph2,Erf,Sms,Smad5,Cacna1c,Prkcz,Anxa7,Dlk1,2300009A05Rik,Dok7,Pip4p1,2510002D24Rik,Tmem109,Spout1,Arglu1,Prrc1,Nr1d1,Gpr1…	0.014
55	query_1	TRUE	4.57e-11	14247	217	191	0.880184	0.0134063	TF:M10209	TF	Factor: E2F-1; motif: GNGGGCGGGRMN	21700	744	TF:M00000	TF,TF,TF,TF,TF,TF,TF,TF,TF,TF,TF,TF,TF,TF,TF,TF,TF,TF,TF,TF,TF,TF,TF,TF,TF,TF,TF,TF,TF,TF,TF,TF,TF,TF,TF,TF,TF,TF,TF,TF,TF,TF,TF,TF,TF,TF,TF,TF,TF,TF,TF,TF,TF,TF,TF,TF,TF,TF,TF,TF,TF,TF,TF,TF,TF,TF,TF,TF,TF,TF,TF,TF,TF,TF,TF,TF,TF,TF,TF,TF,TF,TF,TF,TF,TF,TF,TF,TF,TF,TF,TF,TF,TF,TF,TF,TF,TF,TF,TF,TF,TF,TF,TF,TF,TF,TF,TF,TF,TF,TF,TF,TF,TF,TF,TF,TF,TF,TF,TF,TF,TF,TF,TF,TF,TF,TF,TF,TF,TF,TF,TF,TF,TF,…	Dhtkd1,Tmem74b,Fbxl16,Exoc6b,Ccdc6,Rsbn1l,Pigg,Pcdh10,Wdfy1,Cacna1i,Nfxl1,Farp1,Ro60,Ntn1,Gclm,Ddt,Kpna4,Kpna6,Pld3,Cdk5r2,Nmt2,Dhcr7,Gosr1,Enpp1,Cd44,Ap2a2,Tpi1,Lsp1,Pcgf2,Fas,Kif5c,Prkar2b,Ptpn11,Cd81,Por,Acvr1,Impdh1,Nek1,Pkm,Golga3,Acyp2,Mrps21,Opa1,Gmeb2,Timm10,Prkacb,Tuba4a,Adcyap1r1,Nos3,Hnrnph2,Erf,Sms,Smad5,Cacna1c,Prkcz,Anxa7,Dlk1,2300009A05Rik,Dok7,Pip4p1,Tmem109,Spout1,Arglu1,Prrc1,Sl…	0.013
56	query_1	TRUE	7.12e-11	14701	217	194	0.894009	0.0131964	TF:M01981	TF	Factor: ELK-1; motif: ACCGGAWRTN	21700	930	TF:M00000	TF,TF,TF,TF,TF,TF,TF,TF,TF,TF,TF,TF,TF,TF,TF,TF,TF,TF,TF,TF,TF,TF,TF,TF,TF,TF,TF,TF,TF,TF,TF,TF,TF,TF,TF,TF,TF,TF,TF,TF,TF,TF,TF,TF,TF,TF,TF,TF,TF,TF,TF,TF,TF,TF,TF,TF,TF,TF,TF,TF,TF,TF,TF,TF,TF,TF,TF,TF,TF,TF,TF,TF,TF,TF,TF,TF,TF,TF,TF,TF,TF,TF,TF,TF,TF,TF,TF,TF,TF,TF,TF,TF,TF,TF,TF,TF,TF,TF,TF,TF,TF,TF,TF,TF,TF,TF,TF,TF,TF,TF,TF,TF,TF,TF,TF,TF,TF,TF,TF,TF,TF,TF,TF,TF,TF,TF,TF,TF,TF,TF,TF,TF,TF,…	Tmem74b,Fbxl16,Ccdc6,Rsbn1l,Pigg,Pcdh10,Or51v14,Wdfy1,Cacna1i,Nfxl1,Farp1,Ro60,Ntn1,Gclm,Ddt,Kpna4,Kpna6,Pld3,Cdk5r2,Nmt2,Dhcr7,Gosr1,Pomc,Got2,Enpp1,Cd44,Klk1,Ap2a2,Tpi1,Lsp1,Pcgf2,Ndn,Fas,Klkb1,Kif5c,Prkar2b,Ptpn11,Cd81,Por,Acvr1,Crkl,Impdh1,Nek1,Pkm,Tyro3,Golga3,Acyp2,Mrps21,Opa1,Gmeb2,Timm10,Prkacb,Tuba4a,Adcyap1r1,Hnrnph2,Cdh10,Erf,Sms,Smad5,Cacna1c,Prkcz,Anxa7,Dlk1,2300009A05Rik,Dok7,Pip4p1…	0.013
57	query_1	TRUE	9.01e-11	14864	217	195	0.898618	0.0131189	TF:M00716	TF	Factor: ZF5; motif: GSGCGCGR	21700	3936	TF:M00000	TF,TF,TF,TF,TF,TF,TF,TF,TF,TF,TF,TF,TF,TF,TF,TF,TF,TF,TF,TF,TF,TF,TF,TF,TF,TF,TF,TF,TF,TF,TF,TF,TF,TF,TF,TF,TF,TF,TF,TF,TF,TF,TF,TF,TF,TF,TF,TF,TF,TF,TF,TF,TF,TF,TF,TF,TF,TF,TF,TF,TF,TF,TF,TF,TF,TF,TF,TF,TF,TF,TF,TF,TF,TF,TF,TF,TF,TF,TF,TF,TF,TF,TF,TF,TF,TF,TF,TF,TF,TF,TF,TF,TF,TF,TF,TF,TF,TF,TF,TF,TF,TF,TF,TF,TF,TF,TF,TF,TF,TF,TF,TF,TF,TF,TF,TF,TF,TF,TF,TF,TF,TF,TF,TF,TF,TF,TF,TF,TF,TF,TF,TF,TF,…	Dhtkd1,Tmem74b,Fbxl16,Exoc6b,Ccdc6,Rsbn1l,Pigg,Pcdh10,Wdfy1,Cacna1i,Nfxl1,Farp1,Ro60,Ntn1,Gclm,Ddt,Kpna4,Kpna6,Pld3,Cdk5r2,Nmt2,Dhcr7,Gosr1,Pomc,Got2,Enpp1,Cd44,Ap2a2,Tpi1,Lsp1,Pcgf2,Fas,Kif5c,Ptpn6,Prkar2b,Ptpn11,Cd81,Por,Acvr1,Crkl,Impdh1,Nek1,Pkm,Tyro3,Golga3,Acyp2,Mrps21,Opa1,Gmeb2,Timm10,Prkacb,Tuba4a,Adcyap1r1,Hnrnph2,Cdh10,Erf,Sms,Smad5,Cacna1c,Prkcz,Anxa7,Dlk1,2300009A05Rik,Dok7,Pip4p1,25…	0.013
58	query_1	TRUE	2.71e-09	12079	217	170	0.78341	0.014074	TF:M00716_1	TF	Factor: ZF5; motif: GSGCGCGR; match class: 1	21700	3937	TF:M00716	TF,TF,TF,TF,TF,TF,TF,TF,TF,TF,TF,TF,TF,TF,TF,TF,TF,TF,TF,TF,TF,TF,TF,TF,TF,TF,TF,TF,TF,TF,TF,TF,TF,TF,TF,TF,TF,TF,TF,TF,TF,TF,TF,TF,TF,TF,TF,TF,TF,TF,TF,TF,TF,TF,TF,TF,TF,TF,TF,TF,TF,TF,TF,TF,TF,TF,TF,TF,TF,TF,TF,TF,TF,TF,TF,TF,TF,TF,TF,TF,TF,TF,TF,TF,TF,TF,TF,TF,TF,TF,TF,TF,TF,TF,TF,TF,TF,TF,TF,TF,TF,TF,TF,TF,TF,TF,TF,TF,TF,TF,TF,TF,TF,TF,TF,TF,TF,TF,TF,TF,TF,TF,TF,TF,TF,TF,TF,TF,TF,TF,TF,TF,TF,…	Tmem74b,Fbxl16,Exoc6b,Ccdc6,Rsbn1l,Pigg,Pcdh10,Wdfy1,Cacna1i,Nfxl1,Farp1,Ro60,Ntn1,Gclm,Ddt,Kpna4,Kpna6,Pld3,Cdk5r2,Nmt2,Gosr1,Pomc,Got2,Enpp1,Cd44,Ap2a2,Lsp1,Pcgf2,Fas,Kif5c,Prkar2b,Ptpn11,Cd81,Por,Acvr1,Crkl,Impdh1,Nek1,Pkm,Golga3,Acyp2,Gmeb2,Timm10,Prkacb,Tuba4a,Adcyap1r1,Cdh10,Erf,Sms,Smad5,Cacna1c,Prkcz,Anxa7,Dlk1,2300009A05Rik,Dok7,Pip4p1,2510002D24Rik,Tmem109,Arglu1,Nr1d1,Slc25a31,Samd5,Kl…	0.014
59	query_1	TRUE	3.69e-09	10568	217	156	0.718894	0.0147615	TF:M07380	TF	Factor: E2F-4; motif: NTTTCSCGCC	21700	776	TF:M00000	TF,TF,TF,TF,TF,TF,TF,TF,TF,TF,TF,TF,TF,TF,TF,TF,TF,TF,TF,TF,TF,TF,TF,TF,TF,TF,TF,TF,TF,TF,TF,TF,TF,TF,TF,TF,TF,TF,TF,TF,TF,TF,TF,TF,TF,TF,TF,TF,TF,TF,TF,TF,TF,TF,TF,TF,TF,TF,TF,TF,TF,TF,TF,TF,TF,TF,TF,TF,TF,TF,TF,TF,TF,TF,TF,TF,TF,TF,TF,TF,TF,TF,TF,TF,TF,TF,TF,TF,TF,TF,TF,TF,TF,TF,TF,TF,TF,TF,TF,TF,TF,TF,TF,TF,TF,TF,TF,TF,TF,TF,TF,TF,TF,TF,TF,TF,TF,TF,TF,TF,TF,TF,TF,TF,TF,TF,TF,TF,TF,TF,TF,TF,TF,…	Dhtkd1,Tmem74b,Fbxl16,Ccdc6,Rsbn1l,Pigg,Cacna1i,Nfxl1,Farp1,Ro60,Gclm,Kpna4,Pld3,Cdk5r2,Nmt2,Dhcr7,Gosr1,Got2,Enpp1,Ap2a2,Tpi1,Pcgf2,Prkar2b,Cd81,Por,Acvr1,Crkl,Nek1,Pkm,Golga3,Mrps21,Opa1,Gmeb2,Timm10,Prkacb,Tuba4a,Adcyap1r1,Nos3,Erf,Sms,Cacna1c,Prkcz,Anxa7,Dlk1,2300009A05Rik,Dok7,Pip4p1,2510002D24Rik,Spout1,Arglu1,Nr1d1,Slc25a31,Samd5,Klhdc2,Myo16,Arcn1,Crhbp,Rai1,Abcg1,Grm4,Ripor1,Arhgap23,Isy…	0.015
60	query_1	TRUE	7.12e-09	7933	217	129	0.59447	0.0162612	TF:M10212	TF	Factor: E2F-7; motif: GRGGCGGGAANNN	21700	782	TF:M00000	TF,TF,TF,TF,TF,TF,TF,TF,TF,TF,TF,TF,TF,TF,TF,TF,TF,TF,TF,TF,TF,TF,TF,TF,TF,TF,TF,TF,TF,TF,TF,TF,TF,TF,TF,TF,TF,TF,TF,TF,TF,TF,TF,TF,TF,TF,TF,TF,TF,TF,TF,TF,TF,TF,TF,TF,TF,TF,TF,TF,TF,TF,TF,TF,TF,TF,TF,TF,TF,TF,TF,TF,TF,TF,TF,TF,TF,TF,TF,TF,TF,TF,TF,TF,TF,TF,TF,TF,TF,TF,TF,TF,TF,TF,TF,TF,TF,TF,TF,TF,TF,TF,TF,TF,TF,TF,TF,TF,TF,TF,TF,TF,TF,TF,TF,TF,TF,TF,TF,TF,TF,TF,TF,TF,TF,TF,TF,TF,TF	Dhtkd1,Tmem74b,Ccdc6,Rsbn1l,Pigg,Cacna1i,Nfxl1,Farp1,Ro60,Ntn1,Ddt,Kpna4,Pld3,Nmt2,Dhcr7,Gosr1,Ap2a2,Tpi1,Pcgf2,Prkar2b,Cd81,Por,Acvr1,Nek1,Pkm,Golga3,Acyp2,Mrps21,Opa1,Gmeb2,Timm10,Prkacb,Tuba4a,Adcyap1r1,Sms,Cacna1c,Prkcz,Anxa7,Dlk1,2300009A05Rik,Dok7,Pip4p1,Spout1,Arglu1,Slc25a31,Samd5,Klhdc2,Myo16,Arcn1,Crhbp,Rai1,Ripor1,Arhgap23,Isy1,Cyp4x1,Mtss2,Myh14,Ranbp10,Fbxo11,Actn1,Pdk1,Fam210a,Ano10…	0.016
61	query_1	TRUE	2.19e-08	16001	217	199	0.917051	0.0124367	TF:M04662	TF	Factor: FOXN4; motif: NNWANNCGWMCGCGTCNNNNMT	21700	1180	TF:M00000	TF,TF,TF,TF,TF,TF,TF,TF,TF,TF,TF,TF,TF,TF,TF,TF,TF,TF,TF,TF,TF,TF,TF,TF,TF,TF,TF,TF,TF,TF,TF,TF,TF,TF,TF,TF,TF,TF,TF,TF,TF,TF,TF,TF,TF,TF,TF,TF,TF,TF,TF,TF,TF,TF,TF,TF,TF,TF,TF,TF,TF,TF,TF,TF,TF,TF,TF,TF,TF,TF,TF,TF,TF,TF,TF,TF,TF,TF,TF,TF,TF,TF,TF,TF,TF,TF,TF,TF,TF,TF,TF,TF,TF,TF,TF,TF,TF,TF,TF,TF,TF,TF,TF,TF,TF,TF,TF,TF,TF,TF,TF,TF,TF,TF,TF,TF,TF,TF,TF,TF,TF,TF,TF,TF,TF,TF,TF,TF,TF,TF,TF,TF,TF,…	Dhtkd1,Tmem74b,Fbxl16,Exoc6b,Ccdc6,Rsbn1l,Pigg,Pcdh10,Wdfy1,Cacna1i,Nfxl1,Farp1,Ro60,Ntn1,Gclm,Ddt,Kpna4,Kpna6,Pld3,Cdk5r2,Nmt2,Dhcr7,Pomc,Got2,Enpp1,Cd44,Ap2a2,Lsp1,Pcgf2,Fas,Klkb1,Kif5c,Ptpn6,Prkar2b,Ptpn11,Cd81,Por,Acvr1,Crkl,Impdh1,Nek1,Pkm,Golga3,Acyp2,Mrps21,Opa1,Gmeb2,Timm10,Prkacb,Tuba4a,Adcyap1r1,Nos3,Hnrnph2,Erf,Sms,Smad5,Cacna1c,Prkcz,Anxa7,Dlk1,2300009A05Rik,Dok7,Pip4p1,2510002D24Rik,…	0.012
62	query_1	TRUE	2.35e-08	5379	217	99	0.456221	0.0184049	TF:M07380_1	TF	Factor: E2F-4; motif: NTTTCSCGCC; match class: 1	21700	777	TF:M07380	TF,TF,TF,TF,TF,TF,TF,TF,TF,TF,TF,TF,TF,TF,TF,TF,TF,TF,TF,TF,TF,TF,TF,TF,TF,TF,TF,TF,TF,TF,TF,TF,TF,TF,TF,TF,TF,TF,TF,TF,TF,TF,TF,TF,TF,TF,TF,TF,TF,TF,TF,TF,TF,TF,TF,TF,TF,TF,TF,TF,TF,TF,TF,TF,TF,TF,TF,TF,TF,TF,TF,TF,TF,TF,TF,TF,TF,TF,TF,TF,TF,TF,TF,TF,TF,TF,TF,TF,TF,TF,TF,TF,TF,TF,TF,TF,TF,TF,TF	Dhtkd1,Tmem74b,Fbxl16,Ccdc6,Rsbn1l,Cacna1i,Farp1,Gclm,Kpna4,Pld3,Nmt2,Enpp1,Ap2a2,Pcgf2,Prkar2b,Cd81,Por,Acvr1,Nek1,Golga3,Mrps21,Opa1,Gmeb2,Timm10,Prkacb,Tuba4a,Sms,Cacna1c,Anxa7,Dlk1,2300009A05Rik,Dok7,Pip4p1,Arglu1,Slc25a31,Samd5,Klhdc2,Myo16,Rai1,Grm4,Arhgap23,Mtss2,Myh14,Fbxo11,Actn1,Pdk1,Fam210a,Ptbp3,Slc9a7,Mon1b,Neto2,Pgghg,Tctn1,Sik2,Dpyd,Gatad2a,Cmc2,Ubac2,Zc3h10,Tcf25,Slco3a1,2310022A1…	0.018
63	query_1	TRUE	1.11e-07	13671	217	180	0.829493	0.0131666	TF:M02844	TF	Factor: BCL6B; motif: NNNNCCGCCCCWNNNN	21700	270	TF:M00000	TF,TF,TF,TF,TF,TF,TF,TF,TF,TF,TF,TF,TF,TF,TF,TF,TF,TF,TF,TF,TF,TF,TF,TF,TF,TF,TF,TF,TF,TF,TF,TF,TF,TF,TF,TF,TF,TF,TF,TF,TF,TF,TF,TF,TF,TF,TF,TF,TF,TF,TF,TF,TF,TF,TF,TF,TF,TF,TF,TF,TF,TF,TF,TF,TF,TF,TF,TF,TF,TF,TF,TF,TF,TF,TF,TF,TF,TF,TF,TF,TF,TF,TF,TF,TF,TF,TF,TF,TF,TF,TF,TF,TF,TF,TF,TF,TF,TF,TF,TF,TF,TF,TF,TF,TF,TF,TF,TF,TF,TF,TF,TF,TF,TF,TF,TF,TF,TF,TF,TF,TF,TF,TF,TF,TF,TF,TF,TF,TF,TF,TF,TF,TF,…	Dhtkd1,Tmem74b,Fbxl16,Exoc6b,Ccdc6,Rsbn1l,Pigg,Pcdh10,Wdfy1,Cacna1i,Nfxl1,Farp1,Ro60,Ntn1,Gclm,Ddt,Kpna4,Kpna6,Pld3,Cdk5r2,Nmt2,Dhcr7,Gosr1,Pomc,Mb,Enpp1,Klk1,Klk1b22,Ap2a2,Tpi1,Lsp1,Pcgf2,Fas,Kif5c,Ptpn6,Ptpn11,Cd81,Por,Acvr1,Impdh1,Nek1,Pkm,Tyro3,Golga3,Acyp2,Gmeb2,Timm10,Prkacb,Tuba4a,Nos3,Hnrnph2,Erf,Sms,Smad5,Cacna1c,Prkcz,Anxa7,Dlk1,Dok7,Pip4p1,2510002D24Rik,Tmem109,Arglu1,Prrc1,Nr1d1,Gpr14…	0.013
64	query_1	TRUE	1.44e-07	14448	217	186	0.857143	0.0128738	TF:M00333	TF	Factor: ZF5; motif: NRNGNGCGCGCWN	21700	3938	TF:M00000	TF,TF,TF,TF,TF,TF,TF,TF,TF,TF,TF,TF,TF,TF,TF,TF,TF,TF,TF,TF,TF,TF,TF,TF,TF,TF,TF,TF,TF,TF,TF,TF,TF,TF,TF,TF,TF,TF,TF,TF,TF,TF,TF,TF,TF,TF,TF,TF,TF,TF,TF,TF,TF,TF,TF,TF,TF,TF,TF,TF,TF,TF,TF,TF,TF,TF,TF,TF,TF,TF,TF,TF,TF,TF,TF,TF,TF,TF,TF,TF,TF,TF,TF,TF,TF,TF,TF,TF,TF,TF,TF,TF,TF,TF,TF,TF,TF,TF,TF,TF,TF,TF,TF,TF,TF,TF,TF,TF,TF,TF,TF,TF,TF,TF,TF,TF,TF,TF,TF,TF,TF,TF,TF,TF,TF,TF,TF,TF,TF,TF,TF,TF,TF,…	Dhtkd1,Tmem74b,Fbxl16,Exoc6b,Ccdc6,Rsbn1l,Pcdh10,Wdfy1,Cacna1i,Nfxl1,Farp1,Ro60,Ntn1,Gclm,Ddt,Kpna4,Kpna6,Pld3,Cdk5r2,Nmt2,Dhcr7,Gosr1,Got2,Enpp1,Cd44,Ap2a2,Tpi1,Pcgf2,Fas,Klkb1,Kif5c,Ptpn6,Prkar2b,Ptpn11,Cd81,Por,Acvr1,Crkl,Impdh1,Nek1,Pkm,Tyro3,Golga3,Acyp2,Opa1,Gmeb2,Timm10,Prkacb,Tuba4a,Adcyap1r1,Cdh10,Erf,Sms,Smad5,Cacna1c,Prkcz,Anxa7,Dlk1,2300009A05Rik,Dok7,Pip4p1,2510002D24Rik,Tmem109,Spou…	0.013
65	query_1	TRUE	2.27e-07	12007	217	165	0.760369	0.013742	TF:M01240_1	TF	Factor: BEN; motif: CAGCGRNV; match class: 1	21700	287	TF:M01240	TF,TF,TF,TF,TF,TF,TF,TF,TF,TF,TF,TF,TF,TF,TF,TF,TF,TF,TF,TF,TF,TF,TF,TF,TF,TF,TF,TF,TF,TF,TF,TF,TF,TF,TF,TF,TF,TF,TF,TF,TF,TF,TF,TF,TF,TF,TF,TF,TF,TF,TF,TF,TF,TF,TF,TF,TF,TF,TF,TF,TF,TF,TF,TF,TF,TF,TF,TF,TF,TF,TF,TF,TF,TF,TF,TF,TF,TF,TF,TF,TF,TF,TF,TF,TF,TF,TF,TF,TF,TF,TF,TF,TF,TF,TF,TF,TF,TF,TF,TF,TF,TF,TF,TF,TF,TF,TF,TF,TF,TF,TF,TF,TF,TF,TF,TF,TF,TF,TF,TF,TF,TF,TF,TF,TF,TF,TF,TF,TF,TF,TF,TF,TF,…	Dhtkd1,Tmem74b,Fbxl16,Exoc6b,Ccdc6,Rsbn1l,Pigg,Pcdh10,Wdfy1,Cacna1i,Nfxl1,Farp1,Ntn1,Gclm,Kpna4,Kpna6,Pld3,Cdk5r2,Nmt2,Dhcr7,Pomc,Got2,Enpp1,Ap2a2,Pcgf2,Fas,Kif5c,Ptpn6,Prkar2b,Ptpn11,Cd81,Por,Acvr1,Crkl,Impdh1,Nek1,Pkm,Acyp2,Opa1,Timm10,Prkacb,Tuba4a,Adcyap1r1,Nos3,Cdh10,Erf,Sms,Smad5,Cacna1c,Prkcz,Anxa7,Dlk1,2300009A05Rik,Dok7,Pip4p1,Tmem109,Spout1,Arglu1,Prrc1,Nr1d1,Samd5,Klhdc2,Lrrk2,Arcn1,Cr…	0.014
66	query_1	TRUE	3.64e-07	11293	217	158	0.728111	0.013991	TF:M02089	TF	Factor: E2F-3; motif: GGCGGGN	21700	768	TF:M00000	TF,TF,TF,TF,TF,TF,TF,TF,TF,TF,TF,TF,TF,TF,TF,TF,TF,TF,TF,TF,TF,TF,TF,TF,TF,TF,TF,TF,TF,TF,TF,TF,TF,TF,TF,TF,TF,TF,TF,TF,TF,TF,TF,TF,TF,TF,TF,TF,TF,TF,TF,TF,TF,TF,TF,TF,TF,TF,TF,TF,TF,TF,TF,TF,TF,TF,TF,TF,TF,TF,TF,TF,TF,TF,TF,TF,TF,TF,TF,TF,TF,TF,TF,TF,TF,TF,TF,TF,TF,TF,TF,TF,TF,TF,TF,TF,TF,TF,TF,TF,TF,TF,TF,TF,TF,TF,TF,TF,TF,TF,TF,TF,TF,TF,TF,TF,TF,TF,TF,TF,TF,TF,TF,TF,TF,TF,TF,TF,TF,TF,TF,TF,TF,…	Tmem74b,Fbxl16,Exoc6b,Ccdc6,Rsbn1l,Pigg,Pcdh10,Wdfy1,Cacna1i,Farp1,Ro60,Gclm,Ddt,Kpna4,Pld3,Cdk5r2,Nmt2,Dhcr7,Enpp1,Ap2a2,Tpi1,Lsp1,Pcgf2,Fas,Kif5c,Prkar2b,Ptpn11,Cd81,Por,Acvr1,Impdh1,Nek1,Pkm,Golga3,Acyp2,Gmeb2,Prkacb,Tuba4a,Adcyap1r1,Nos3,Erf,Sms,Smad5,Cacna1c,Prkcz,Dlk1,2300009A05Rik,Dok7,Pip4p1,Tmem109,Arglu1,Slc25a31,Samd5,Klhdc2,Myo16,Lrrk2,Arcn1,Crhbp,Rai1,Abcg1,Grm4,Ripor1,Arhgap23,Dusp2…	0.014
67	query_1	TRUE	3.98e-07	14313	217	184	0.847926	0.0128554	TF:M08995	TF	Factor: CTCF; motif: NAGGGGGCGCNNKNNNN	21700	622	TF:M00000	TF,TF,TF,TF,TF,TF,TF,TF,TF,TF,TF,TF,TF,TF,TF,TF,TF,TF,TF,TF,TF,TF,TF,TF,TF,TF,TF,TF,TF,TF,TF,TF,TF,TF,TF,TF,TF,TF,TF,TF,TF,TF,TF,TF,TF,TF,TF,TF,TF,TF,TF,TF,TF,TF,TF,TF,TF,TF,TF,TF,TF,TF,TF,TF,TF,TF,TF,TF,TF,TF,TF,TF,TF,TF,TF,TF,TF,TF,TF,TF,TF,TF,TF,TF,TF,TF,TF,TF,TF,TF,TF,TF,TF,TF,TF,TF,TF,TF,TF,TF,TF,TF,TF,TF,TF,TF,TF,TF,TF,TF,TF,TF,TF,TF,TF,TF,TF,TF,TF,TF,TF,TF,TF,TF,TF,TF,TF,TF,TF,TF,TF,TF,TF,…	Dhtkd1,Tmem74b,Fbxl16,Exoc6b,Ccdc6,Rsbn1l,Pigg,Pcdh10,Wdfy1,Cacna1i,Nfxl1,Farp1,Ro60,Ntn1,Gclm,Ddt,Kpna4,Kpna6,Pld3,Cdk5r2,Nmt2,Dhcr7,Pomc,Mb,Got2,Enpp1,Cd44,Klk1,Ap2a2,Lsp1,Pcgf2,Fas,Klkb1,Kif5c,Prkar2b,Ptpn11,Cd81,Por,Acvr1,Crkl,Impdh1,Nek1,Pkm,Tyro3,Golga3,Timm10,Prkacb,Tuba4a,Adcyap1r1,Nos3,Hnrnph2,Cdh10,Erf,Sms,Smad5,Cacna1c,Prkcz,Anxa7,Dlk1,2300009A05Rik,Dok7,Pip4p1,2510002D24Rik,Tmem109,Sp…	0.013
68	query_1	TRUE	4.82e-07	11218	217	157	0.723502	0.0139954	TF:M00333_1	TF	Factor: ZF5; motif: NRNGNGCGCGCWN; match class: 1	21700	3939	TF:M00333	TF,TF,TF,TF,TF,TF,TF,TF,TF,TF,TF,TF,TF,TF,TF,TF,TF,TF,TF,TF,TF,TF,TF,TF,TF,TF,TF,TF,TF,TF,TF,TF,TF,TF,TF,TF,TF,TF,TF,TF,TF,TF,TF,TF,TF,TF,TF,TF,TF,TF,TF,TF,TF,TF,TF,TF,TF,TF,TF,TF,TF,TF,TF,TF,TF,TF,TF,TF,TF,TF,TF,TF,TF,TF,TF,TF,TF,TF,TF,TF,TF,TF,TF,TF,TF,TF,TF,TF,TF,TF,TF,TF,TF,TF,TF,TF,TF,TF,TF,TF,TF,TF,TF,TF,TF,TF,TF,TF,TF,TF,TF,TF,TF,TF,TF,TF,TF,TF,TF,TF,TF,TF,TF,TF,TF,TF,TF,TF,TF,TF,TF,TF,TF,…	Tmem74b,Fbxl16,Exoc6b,Ccdc6,Rsbn1l,Pcdh10,Wdfy1,Cacna1i,Nfxl1,Farp1,Ro60,Ntn1,Gclm,Ddt,Kpna6,Cdk5r2,Nmt2,Dhcr7,Got2,Enpp1,Ap2a2,Tpi1,Pcgf2,Kif5c,Prkar2b,Ptpn11,Cd81,Por,Acvr1,Crkl,Nek1,Tyro3,Acyp2,Gmeb2,Timm10,Prkacb,Tuba4a,Adcyap1r1,Erf,Sms,Smad5,Cacna1c,Prkcz,Anxa7,Dlk1,2300009A05Rik,Dok7,Pip4p1,2510002D24Rik,Spout1,Arglu1,Prrc1,Slc25a31,Samd5,Klhdc2,Arcn1,Crhbp,Rai1,Abcg1,Grm4,Ripor1,Isy1,Dusp…	0.014
69	query_1	TRUE	2.12e-06	8349	217	127	0.585253	0.0152114	TF:M00008	TF	Factor: Sp1; motif: GGGGCGGGGT	21700	3318	TF:M00000	TF,TF,TF,TF,TF,TF,TF,TF,TF,TF,TF,TF,TF,TF,TF,TF,TF,TF,TF,TF,TF,TF,TF,TF,TF,TF,TF,TF,TF,TF,TF,TF,TF,TF,TF,TF,TF,TF,TF,TF,TF,TF,TF,TF,TF,TF,TF,TF,TF,TF,TF,TF,TF,TF,TF,TF,TF,TF,TF,TF,TF,TF,TF,TF,TF,TF,TF,TF,TF,TF,TF,TF,TF,TF,TF,TF,TF,TF,TF,TF,TF,TF,TF,TF,TF,TF,TF,TF,TF,TF,TF,TF,TF,TF,TF,TF,TF,TF,TF,TF,TF,TF,TF,TF,TF,TF,TF,TF,TF,TF,TF,TF,TF,TF,TF,TF,TF,TF,TF,TF,TF,TF,TF,TF,TF,TF,TF	Tmem74b,Fbxl16,Exoc6b,Ccdc6,Rsbn1l,Pcdh10,Wdfy1,Farp1,Ro60,Ntn1,Gclm,Ddt,Kpna4,Kpna6,Pld3,Nmt2,Dhcr7,Enpp1,Ap2a2,Tpi1,Pcgf2,Kif5c,Prkar2b,Cd81,Por,Acvr1,Nek1,Pkm,Golga3,Acyp2,Gmeb2,Timm10,Prkacb,Tuba4a,Adcyap1r1,Nos3,Sms,2300009A05Rik,Dok7,Pip4p1,Tmem109,Arglu1,Slc25a31,Klhdc2,Lrrk2,Arcn1,Crhbp,Rai1,Abcg1,Ripor1,Arhgap23,Isy1,Cyp4x1,Dusp23,Mtss2,Ranbp10,Fbxo11,Actn1,Gtf2a2,Pdk1,Ano10,Ptbp3,Atcay,…	0.015
70	query_1	TRUE	2.27e-06	16229	217	197	0.907834	0.0121388	TF:M01240	TF	Factor: BEN; motif: CAGCGRNV	21700	286	TF:M00000	TF,TF,TF,TF,TF,TF,TF,TF,TF,TF,TF,TF,TF,TF,TF,TF,TF,TF,TF,TF,TF,TF,TF,TF,TF,TF,TF,TF,TF,TF,TF,TF,TF,TF,TF,TF,TF,TF,TF,TF,TF,TF,TF,TF,TF,TF,TF,TF,TF,TF,TF,TF,TF,TF,TF,TF,TF,TF,TF,TF,TF,TF,TF,TF,TF,TF,TF,TF,TF,TF,TF,TF,TF,TF,TF,TF,TF,TF,TF,TF,TF,TF,TF,TF,TF,TF,TF,TF,TF,TF,TF,TF,TF,TF,TF,TF,TF,TF,TF,TF,TF,TF,TF,TF,TF,TF,TF,TF,TF,TF,TF,TF,TF,TF,TF,TF,TF,TF,TF,TF,TF,TF,TF,TF,TF,TF,TF,TF,TF,TF,TF,TF,TF,…	Dhtkd1,Tmem74b,Fbxl16,Exoc6b,Ccdc6,Rsbn1l,Pigg,Pcdh10,Wdfy1,Cacna1i,Nfxl1,Farp1,Ro60,Ntn1,Gclm,Ddt,Kpna4,Kpna6,Pld3,Cdk5r2,Nmt2,Dhcr7,Gosr1,Pomc,Mb,Got2,Enpp1,Ap2a2,Tpi1,Pcgf2,Fas,Kif5c,Ptpn6,Prkar2b,Ptpn11,Cd81,Por,Acvr1,Crkl,Impdh1,Nek1,Pkm,Golga3,Acyp2,Mrps21,Opa1,Gmeb2,Timm10,Prkacb,Tuba4a,Adcyap1r1,Nos3,Cdh10,Erf,Sms,Smad5,Cacna1c,Prkcz,Anxa7,Dlk1,2300009A05Rik,Dok7,Pip4p1,2510002D24Rik,Tmem…	0.012
71	query_1	TRUE	4.26e-06	8048	217	123	0.56682	0.0152833	TF:M00189	TF	Factor: AP-2; motif: MKCCCSCNGGCG	21700	118	TF:M00000	TF,TF,TF,TF,TF,TF,TF,TF,TF,TF,TF,TF,TF,TF,TF,TF,TF,TF,TF,TF,TF,TF,TF,TF,TF,TF,TF,TF,TF,TF,TF,TF,TF,TF,TF,TF,TF,TF,TF,TF,TF,TF,TF,TF,TF,TF,TF,TF,TF,TF,TF,TF,TF,TF,TF,TF,TF,TF,TF,TF,TF,TF,TF,TF,TF,TF,TF,TF,TF,TF,TF,TF,TF,TF,TF,TF,TF,TF,TF,TF,TF,TF,TF,TF,TF,TF,TF,TF,TF,TF,TF,TF,TF,TF,TF,TF,TF,TF,TF,TF,TF,TF,TF,TF,TF,TF,TF,TF,TF,TF,TF,TF,TF,TF,TF,TF,TF,TF,TF,TF,TF,TF,TF	Dhtkd1,Tmem74b,Exoc6b,Ccdc6,Rsbn1l,Wdfy1,Cacna1i,Nfxl1,Farp1,Ro60,Ntn1,Gclm,Pld3,Cdk5r2,Nmt2,Got2,Enpp1,Cd44,Ap2a2,Tpi1,Lsp1,Fas,Klkb1,Kif5c,Prkar2b,Ptpn11,Cd81,Acvr1,Tyro3,Golga3,Gmeb2,Prkacb,Tuba4a,Adcyap1r1,Erf,Sms,Smad5,Cacna1c,Prkcz,Dlk1,Dok7,Pip4p1,Arglu1,Prrc1,Slc25a31,Samd5,Klhdc2,Rai1,Grm4,Ripor1,Arhgap23,Cyp4x1,Mtss2,Ranbp10,Cyfip1,Fbxo11,Actn1,Ptbp3,Bmp3,Serinc5,Mon1b,Neto2,Armc6,Casp9…	0.015
72	query_1	TRUE	4.83e-06	8541	217	128	0.589862	0.0149865	TF:M02844_1	TF	Factor: BCL6B; motif: NNNNCCGCCCCWNNNN; match class: 1	21700	271	TF:M02844	TF,TF,TF,TF,TF,TF,TF,TF,TF,TF,TF,TF,TF,TF,TF,TF,TF,TF,TF,TF,TF,TF,TF,TF,TF,TF,TF,TF,TF,TF,TF,TF,TF,TF,TF,TF,TF,TF,TF,TF,TF,TF,TF,TF,TF,TF,TF,TF,TF,TF,TF,TF,TF,TF,TF,TF,TF,TF,TF,TF,TF,TF,TF,TF,TF,TF,TF,TF,TF,TF,TF,TF,TF,TF,TF,TF,TF,TF,TF,TF,TF,TF,TF,TF,TF,TF,TF,TF,TF,TF,TF,TF,TF,TF,TF,TF,TF,TF,TF,TF,TF,TF,TF,TF,TF,TF,TF,TF,TF,TF,TF,TF,TF,TF,TF,TF,TF,TF,TF,TF,TF,TF,TF,TF,TF,TF,TF,TF	Tmem74b,Fbxl16,Exoc6b,Ccdc6,Pcdh10,Cacna1i,Farp1,Ro60,Ntn1,Kpna4,Pld3,Dhcr7,Mb,Enpp1,Klk1,Klk1b22,Ap2a2,Tpi1,Lsp1,Pcgf2,Fas,Kif5c,Ptpn6,Ptpn11,Cd81,Por,Acvr1,Impdh1,Nek1,Pkm,Golga3,Acyp2,Gmeb2,Tuba4a,Hnrnph2,Erf,Smad5,Cacna1c,Anxa7,Dlk1,Dok7,Pip4p1,2510002D24Rik,Tmem109,Arglu1,Prrc1,Slc25a31,Samd5,Klhdc2,Myo16,Lrrk2,Crhbp,Rai1,Abcg1,Grm4,Ripor1,Arhgap23,Dusp23,Mtss2,Myh14,Cyfip1,Fbxo11,Actn1,Pdk1…	0.015
73	query_1	TRUE	9.02e-06	10005	217	142	0.654378	0.0141929	TF:M10276_1	TF	Factor: Kaiso; motif: SARNYCTCGCGAGAN; match class: 1	21700	3903	TF:M10276	TF,TF,TF,TF,TF,TF,TF,TF,TF,TF,TF,TF,TF,TF,TF,TF,TF,TF,TF,TF,TF,TF,TF,TF,TF,TF,TF,TF,TF,TF,TF,TF,TF,TF,TF,TF,TF,TF,TF,TF,TF,TF,TF,TF,TF,TF,TF,TF,TF,TF,TF,TF,TF,TF,TF,TF,TF,TF,TF,TF,TF,TF,TF,TF,TF,TF,TF,TF,TF,TF,TF,TF,TF,TF,TF,TF,TF,TF,TF,TF,TF,TF,TF,TF,TF,TF,TF,TF,TF,TF,TF,TF,TF,TF,TF,TF,TF,TF,TF,TF,TF,TF,TF,TF,TF,TF,TF,TF,TF,TF,TF,TF,TF,TF,TF,TF,TF,TF,TF,TF,TF,TF,TF,TF,TF,TF,TF,TF,TF,TF,TF,TF,TF,…	Tmem74b,Fbxl16,Exoc6b,Ccdc6,Rsbn1l,Pigg,Pcdh10,Wdfy1,Cacna1i,Nfxl1,Farp1,Ntn1,Gclm,Ddt,Kpna4,Kpna6,Pld3,Cdk5r2,Nmt2,Pomc,Enpp1,Ap2a2,Pcgf2,Kif5c,Prkar2b,Ptpn11,Cd81,Por,Acvr1,Crkl,Impdh1,Pkm,Golga3,Acyp2,Mrps21,Opa1,Gmeb2,Timm10,Prkacb,Tuba4a,Hnrnph2,Erf,Sms,Smad5,Cacna1c,Prkcz,Anxa7,Dlk1,Dok7,Pip4p1,2510002D24Rik,Tmem109,Arglu1,Prrc1,Samd5,Klhdc2,Myo16,Arcn1,Rai1,Grm4,Ripor1,Arhgap23,Isy1,Mtss2,…	0.014
74	query_1	TRUE	1.03e-05	10744	217	149	0.686636	0.0138682	TF:M10375	TF	Factor: Sp1; motif: GGNGGGGGNGGGGGMGGGGCNGGG	21700	3322	TF:M00000	TF,TF,TF,TF,TF,TF,TF,TF,TF,TF,TF,TF,TF,TF,TF,TF,TF,TF,TF,TF,TF,TF,TF,TF,TF,TF,TF,TF,TF,TF,TF,TF,TF,TF,TF,TF,TF,TF,TF,TF,TF,TF,TF,TF,TF,TF,TF,TF,TF,TF,TF,TF,TF,TF,TF,TF,TF,TF,TF,TF,TF,TF,TF,TF,TF,TF,TF,TF,TF,TF,TF,TF,TF,TF,TF,TF,TF,TF,TF,TF,TF,TF,TF,TF,TF,TF,TF,TF,TF,TF,TF,TF,TF,TF,TF,TF,TF,TF,TF,TF,TF,TF,TF,TF,TF,TF,TF,TF,TF,TF,TF,TF,TF,TF,TF,TF,TF,TF,TF,TF,TF,TF,TF,TF,TF,TF,TF,TF,TF,TF,TF,TF,TF,…	Dhtkd1,Tmem74b,Fbxl16,Exoc6b,Ccdc6,Rsbn1l,Wdfy1,Cacna1i,Farp1,Ro60,Ntn1,Gclm,Ddt,Kpna4,Pld3,Cdk5r2,Nmt2,Mb,Enpp1,Cd44,Klk1b22,Ap2a2,Lsp1,Pcgf2,Fas,Ptpn6,Prkar2b,Ptpn11,Cd81,Acvr1,Crkl,Impdh1,Nek1,Pkm,Golga3,Acyp2,Gmeb2,Timm10,Prkacb,Tuba4a,Adcyap1r1,Nos3,Hnrnph2,Erf,Sms,Smad5,Cacna1c,Prkcz,Dlk1,2300009A05Rik,Dok7,Pip4p1,2510002D24Rik,Tmem109,Prrc1,Samd5,Klhdc2,Myo16,Lrrk2,Arcn1,Crhbp,Rai1,Abcg1,G…	0.014
75	query_1	TRUE	1.55e-05	7916	217	120	0.552995	0.0151592	TF:M00428	TF	Factor: E2F-1; motif: NKTSSCGC	21700	746	TF:M00000	TF,TF,TF,TF,TF,TF,TF,TF,TF,TF,TF,TF,TF,TF,TF,TF,TF,TF,TF,TF,TF,TF,TF,TF,TF,TF,TF,TF,TF,TF,TF,TF,TF,TF,TF,TF,TF,TF,TF,TF,TF,TF,TF,TF,TF,TF,TF,TF,TF,TF,TF,TF,TF,TF,TF,TF,TF,TF,TF,TF,TF,TF,TF,TF,TF,TF,TF,TF,TF,TF,TF,TF,TF,TF,TF,TF,TF,TF,TF,TF,TF,TF,TF,TF,TF,TF,TF,TF,TF,TF,TF,TF,TF,TF,TF,TF,TF,TF,TF,TF,TF,TF,TF,TF,TF,TF,TF,TF,TF,TF,TF,TF,TF,TF,TF,TF,TF,TF,TF,TF	Dhtkd1,Tmem74b,Fbxl16,Exoc6b,Ccdc6,Pcdh10,Cacna1i,Nfxl1,Farp1,Ntn1,Gclm,Ddt,Kpna6,Pld3,Nmt2,Dhcr7,Got2,Enpp1,Cd44,Ap2a2,Pcgf2,Kif5c,Prkar2b,Ptpn11,Cd81,Por,Acvr1,Crkl,Nek1,Pkm,Golga3,Acyp2,Gmeb2,Prkacb,Hnrnph2,Cdh10,Sms,Smad5,Cacna1c,Prkcz,Anxa7,2300009A05Rik,Pip4p1,Tmem109,Arglu1,Prrc1,Slc25a31,Samd5,Klhdc2,Myo16,Arcn1,Rai1,Abcg1,Grm4,Cyp4x1,Mtss2,Cyfip1,Actn1,Pdk1,Ano10,Ptbp3,Bmp3,Serinc5,Slc9a…	0.015
76	query_1	TRUE	1.62e-05	6904	217	109	0.502304	0.0157879	TF:M02089_1	TF	Factor: E2F-3; motif: GGCGGGN; match class: 1	21700	769	TF:M02089	TF,TF,TF,TF,TF,TF,TF,TF,TF,TF,TF,TF,TF,TF,TF,TF,TF,TF,TF,TF,TF,TF,TF,TF,TF,TF,TF,TF,TF,TF,TF,TF,TF,TF,TF,TF,TF,TF,TF,TF,TF,TF,TF,TF,TF,TF,TF,TF,TF,TF,TF,TF,TF,TF,TF,TF,TF,TF,TF,TF,TF,TF,TF,TF,TF,TF,TF,TF,TF,TF,TF,TF,TF,TF,TF,TF,TF,TF,TF,TF,TF,TF,TF,TF,TF,TF,TF,TF,TF,TF,TF,TF,TF,TF,TF,TF,TF,TF,TF,TF,TF,TF,TF,TF,TF,TF,TF,TF,TF	Tmem74b,Fbxl16,Exoc6b,Ccdc6,Rsbn1l,Pigg,Cacna1i,Farp1,Ro60,Ddt,Kpna4,Cdk5r2,Nmt2,Dhcr7,Enpp1,Ap2a2,Pcgf2,Fas,Kif5c,Prkar2b,Ptpn11,Cd81,Por,Acvr1,Impdh1,Nek1,Pkm,Golga3,Tuba4a,Adcyap1r1,Erf,Sms,Smad5,Cacna1c,Prkcz,Dlk1,2300009A05Rik,Dok7,Pip4p1,Arglu1,Slc25a31,Samd5,Myo16,Lrrk2,Arcn1,Rai1,Abcg1,Grm4,Ripor1,Arhgap23,Dusp23,Mtss2,Ranbp10,Cyfip1,Fbxo11,Actn1,Pdk1,Ano10,Ptbp3,Atcay,Serinc5,Slc9a7,Rab3…	0.016
77	query_1	TRUE	2.57e-05	13504	217	173	0.797235	0.012811	TF:M10276	TF	Factor: Kaiso; motif: SARNYCTCGCGAGAN	21700	3902	TF:M00000	TF,TF,TF,TF,TF,TF,TF,TF,TF,TF,TF,TF,TF,TF,TF,TF,TF,TF,TF,TF,TF,TF,TF,TF,TF,TF,TF,TF,TF,TF,TF,TF,TF,TF,TF,TF,TF,TF,TF,TF,TF,TF,TF,TF,TF,TF,TF,TF,TF,TF,TF,TF,TF,TF,TF,TF,TF,TF,TF,TF,TF,TF,TF,TF,TF,TF,TF,TF,TF,TF,TF,TF,TF,TF,TF,TF,TF,TF,TF,TF,TF,TF,TF,TF,TF,TF,TF,TF,TF,TF,TF,TF,TF,TF,TF,TF,TF,TF,TF,TF,TF,TF,TF,TF,TF,TF,TF,TF,TF,TF,TF,TF,TF,TF,TF,TF,TF,TF,TF,TF,TF,TF,TF,TF,TF,TF,TF,TF,TF,TF,TF,TF,TF,…	Tmem74b,Fbxl16,Exoc6b,Ccdc6,Rsbn1l,Pigg,Pcdh10,Wdfy1,Cacna1i,Nfxl1,Farp1,Ro60,Ntn1,Gclm,Ddt,Kpna4,Kpna6,Pld3,Cdk5r2,Nmt2,Pomc,Enpp1,Cd44,Ap2a2,Tpi1,Pcgf2,Ndn,Fas,Kif5c,Prkar2b,Ptpn11,Cd81,Por,Acvr1,Crkl,Impdh1,Nek1,Pkm,Golga3,Acyp2,Mrps21,Opa1,Gmeb2,Timm10,Prkacb,Tuba4a,Adcyap1r1,Hnrnph2,Erf,Sms,Smad5,Cacna1c,Prkcz,Anxa7,Dlk1,2300009A05Rik,Dok7,Pip4p1,2510002D24Rik,Tmem109,Spout1,Arglu1,Prrc1,Slc…	0.013
78	query_1	TRUE	2.61e-05	9039	217	131	0.603687	0.0144928	TF:M07250	TF	Factor: E2F-1; motif: NNNSSCGCSAANN	21700	752	TF:M00000	TF,TF,TF,TF,TF,TF,TF,TF,TF,TF,TF,TF,TF,TF,TF,TF,TF,TF,TF,TF,TF,TF,TF,TF,TF,TF,TF,TF,TF,TF,TF,TF,TF,TF,TF,TF,TF,TF,TF,TF,TF,TF,TF,TF,TF,TF,TF,TF,TF,TF,TF,TF,TF,TF,TF,TF,TF,TF,TF,TF,TF,TF,TF,TF,TF,TF,TF,TF,TF,TF,TF,TF,TF,TF,TF,TF,TF,TF,TF,TF,TF,TF,TF,TF,TF,TF,TF,TF,TF,TF,TF,TF,TF,TF,TF,TF,TF,TF,TF,TF,TF,TF,TF,TF,TF,TF,TF,TF,TF,TF,TF,TF,TF,TF,TF,TF,TF,TF,TF,TF,TF,TF,TF,TF,TF,TF,TF,TF,TF,TF,TF	Tmem74b,Fbxl16,Exoc6b,Ccdc6,Rsbn1l,Pcdh10,Cacna1i,Nfxl1,Farp1,Ro60,Ntn1,Gclm,Ddt,Kpna4,Kpna6,Pld3,Cdk5r2,Nmt2,Enpp1,Cd44,Ap2a2,Tpi1,Pcgf2,Kif5c,Prkar2b,Ptpn11,Cd81,Acvr1,Crkl,Pkm,Mrps21,Gmeb2,Timm10,Prkacb,Adcyap1r1,Hnrnph2,Cdh10,Erf,Sms,Cacna1c,Prkcz,Anxa7,Dlk1,2300009A05Rik,Spout1,Arglu1,Prrc1,Slc25a31,Samd5,Klhdc2,Myo16,Arcn1,Rai1,Grm4,Ripor1,Cyp4x1,Mtss2,Cyfip1,Fbxo11,Actn1,Pdk1,Ptbp3,Bmp3,Se…	0.014
79	query_1	TRUE	2.62e-05	15200	217	187	0.861751	0.0123026	TF:M07991	TF	Factor: Hes1; motif: NNCACGYGNN	21700	1468	TF:M00000	TF,TF,TF,TF,TF,TF,TF,TF,TF,TF,TF,TF,TF,TF,TF,TF,TF,TF,TF,TF,TF,TF,TF,TF,TF,TF,TF,TF,TF,TF,TF,TF,TF,TF,TF,TF,TF,TF,TF,TF,TF,TF,TF,TF,TF,TF,TF,TF,TF,TF,TF,TF,TF,TF,TF,TF,TF,TF,TF,TF,TF,TF,TF,TF,TF,TF,TF,TF,TF,TF,TF,TF,TF,TF,TF,TF,TF,TF,TF,TF,TF,TF,TF,TF,TF,TF,TF,TF,TF,TF,TF,TF,TF,TF,TF,TF,TF,TF,TF,TF,TF,TF,TF,TF,TF,TF,TF,TF,TF,TF,TF,TF,TF,TF,TF,TF,TF,TF,TF,TF,TF,TF,TF,TF,TF,TF,TF,TF,TF,TF,TF,TF,TF,…	Dhtkd1,Tmem74b,Fbxl16,Exoc6b,Ccdc6,Rsbn1l,Pigg,Pcdh10,Or51v14,Wdfy1,Cacna1i,Nfxl1,Farp1,Ro60,Gclm,Ddt,Kpna4,Kpna6,Pld3,Nmt2,Dhcr7,Gosr1,Got2,Enpp1,Cd44,Ap2a2,Tpi1,Lsp1,Pcgf2,Fas,Klkb1,Kif5c,Ptpn6,Prkar2b,Ptpn11,Cd81,Por,Acvr1,Crkl,Impdh1,Nek1,Pkm,Tyro3,Golga3,Mrps21,Opa1,Gmeb2,Timm10,Prkacb,Tuba4a,Adcyap1r1,Nos3,Hnrnph2,Erf,Sms,Smad5,Cacna1c,Prkcz,Anxa7,Dlk1,2300009A05Rik,Dok7,Pip4p1,2510002D24Ri…	0.012
80	query_1	TRUE	2.69e-05	9141	217	132	0.608295	0.0144404	TF:M07395	TF	Factor: Sp1; motif: NGGGGCGGGGN	21700	3326	TF:M00000	TF,TF,TF,TF,TF,TF,TF,TF,TF,TF,TF,TF,TF,TF,TF,TF,TF,TF,TF,TF,TF,TF,TF,TF,TF,TF,TF,TF,TF,TF,TF,TF,TF,TF,TF,TF,TF,TF,TF,TF,TF,TF,TF,TF,TF,TF,TF,TF,TF,TF,TF,TF,TF,TF,TF,TF,TF,TF,TF,TF,TF,TF,TF,TF,TF,TF,TF,TF,TF,TF,TF,TF,TF,TF,TF,TF,TF,TF,TF,TF,TF,TF,TF,TF,TF,TF,TF,TF,TF,TF,TF,TF,TF,TF,TF,TF,TF,TF,TF,TF,TF,TF,TF,TF,TF,TF,TF,TF,TF,TF,TF,TF,TF,TF,TF,TF,TF,TF,TF,TF,TF,TF,TF,TF,TF,TF,TF,TF,TF,TF,TF,TF	Tmem74b,Fbxl16,Exoc6b,Ccdc6,Rsbn1l,Pigg,Pcdh10,Cacna1i,Farp1,Ro60,Gclm,Ddt,Cdk5r2,Nmt2,Dhcr7,Enpp1,Ap2a2,Tpi1,Lsp1,Pcgf2,Fas,Kif5c,Prkar2b,Ptpn11,Cd81,Por,Acvr1,Impdh1,Nek1,Pkm,Golga3,Acyp2,Prkacb,Tuba4a,Adcyap1r1,Nos3,Hnrnph2,Erf,Sms,Smad5,Cacna1c,Prkcz,Dlk1,2300009A05Rik,Dok7,Pip4p1,Arglu1,Slc25a31,Myo16,Lrrk2,Arcn1,Crhbp,Rai1,Abcg1,Ripor1,Arhgap23,Dusp23,Mtss2,Ranbp10,Cyfip1,Fbxo11,Actn1,Pdk1,…	0.014
81	query_1	TRUE	6.3e-05	4543	217	80	0.368664	0.0176095	TF:M07395_1	TF	Factor: Sp1; motif: NGGGGCGGGGN; match class: 1	21700	3327	TF:M07395	TF,TF,TF,TF,TF,TF,TF,TF,TF,TF,TF,TF,TF,TF,TF,TF,TF,TF,TF,TF,TF,TF,TF,TF,TF,TF,TF,TF,TF,TF,TF,TF,TF,TF,TF,TF,TF,TF,TF,TF,TF,TF,TF,TF,TF,TF,TF,TF,TF,TF,TF,TF,TF,TF,TF,TF,TF,TF,TF,TF,TF,TF,TF,TF,TF,TF,TF,TF,TF,TF,TF,TF,TF,TF,TF,TF,TF,TF,TF,TF	Tmem74b,Fbxl16,Exoc6b,Ccdc6,Farp1,Ro60,Nmt2,Dhcr7,Enpp1,Ap2a2,Pcgf2,Fas,Ptpn11,Cd81,Por,Acvr1,Impdh1,Nek1,Pkm,Golga3,Tuba4a,Erf,2300009A05Rik,Dok7,Pip4p1,Arglu1,Slc25a31,Myo16,Arcn1,Rai1,Abcg1,Ripor1,Arhgap23,Dusp23,Ranbp10,Fbxo11,Actn1,Ano10,Ptbp3,Atcay,Serinc5,Slc9a7,Mon1b,Neto2,Ttc12,Tctn1,Casp9,Sik2,Dpyd,Gatad2a,Cmc2,Angel2,Ablim1,Znfx1,Slco3a1,Ubac1,Dtnbp1,Sh3bp4,Ppp1r16a,Neurl1a,Smc6,Eps8l2…	0.018
82	query_1	TRUE	6.9e-05	8675	217	126	0.580645	0.0145245	TF:M00931	TF	Factor: Sp1; motif: GGGGCGGGGC	21700	3332	TF:M00000	TF,TF,TF,TF,TF,TF,TF,TF,TF,TF,TF,TF,TF,TF,TF,TF,TF,TF,TF,TF,TF,TF,TF,TF,TF,TF,TF,TF,TF,TF,TF,TF,TF,TF,TF,TF,TF,TF,TF,TF,TF,TF,TF,TF,TF,TF,TF,TF,TF,TF,TF,TF,TF,TF,TF,TF,TF,TF,TF,TF,TF,TF,TF,TF,TF,TF,TF,TF,TF,TF,TF,TF,TF,TF,TF,TF,TF,TF,TF,TF,TF,TF,TF,TF,TF,TF,TF,TF,TF,TF,TF,TF,TF,TF,TF,TF,TF,TF,TF,TF,TF,TF,TF,TF,TF,TF,TF,TF,TF,TF,TF,TF,TF,TF,TF,TF,TF,TF,TF,TF,TF,TF,TF,TF,TF,TF	Tmem74b,Fbxl16,Exoc6b,Ccdc6,Rsbn1l,Pigg,Pcdh10,Wdfy1,Cacna1i,Farp1,Ro60,Gclm,Ddt,Kpna4,Cdk5r2,Nmt2,Dhcr7,Enpp1,Ap2a2,Tpi1,Lsp1,Pcgf2,Fas,Kif5c,Prkar2b,Ptpn11,Cd81,Por,Acvr1,Impdh1,Nek1,Pkm,Golga3,Acyp2,Prkacb,Tuba4a,Adcyap1r1,Nos3,Erf,Sms,Cacna1c,Prkcz,Dlk1,2300009A05Rik,Dok7,Pip4p1,Arglu1,Slc25a31,Myo16,Lrrk2,Arcn1,Crhbp,Rai1,Abcg1,Ripor1,Arhgap23,Dusp23,Mtss2,Ranbp10,Cyfip1,Fbxo11,Actn1,Pdk1,An…	0.015
83	query_1	TRUE	6.93e-05	7258	217	111	0.511521	0.0152935	TF:M05391	TF	Factor: LKLF; motif: NGGGCGG	21700	1962	TF:M00000	TF,TF,TF,TF,TF,TF,TF,TF,TF,TF,TF,TF,TF,TF,TF,TF,TF,TF,TF,TF,TF,TF,TF,TF,TF,TF,TF,TF,TF,TF,TF,TF,TF,TF,TF,TF,TF,TF,TF,TF,TF,TF,TF,TF,TF,TF,TF,TF,TF,TF,TF,TF,TF,TF,TF,TF,TF,TF,TF,TF,TF,TF,TF,TF,TF,TF,TF,TF,TF,TF,TF,TF,TF,TF,TF,TF,TF,TF,TF,TF,TF,TF,TF,TF,TF,TF,TF,TF,TF,TF,TF,TF,TF,TF,TF,TF,TF,TF,TF,TF,TF,TF,TF,TF,TF,TF,TF,TF,TF,TF,TF	Tmem74b,Fbxl16,Exoc6b,Ccdc6,Farp1,Kpna4,Pld3,Cdk5r2,Nmt2,Enpp1,Tpi1,Klkb1,Kif5c,Ptpn6,Prkar2b,Ptpn11,Cd81,Acvr1,Crkl,Impdh1,Nek1,Pkm,Tyro3,Opa1,Gmeb2,Timm10,Prkacb,Tuba4a,Sms,Smad5,Prkcz,2300009A05Rik,Dok7,Pip4p1,Tmem109,Spout1,Arglu1,Prrc1,Klhdc2,Myo16,Arcn1,Rai1,Abcg1,Grm4,Dusp23,Myh14,Ranbp10,Cyfip1,Pdk1,Ptbp3,Bmp3,Serinc5,Slc9a7,Mon1b,Neto2,Pgghg,Ttc12,Tctn1,Casp9,Gatad2a,Angel2,Znfx1,Ubac2,S…	0.015
84	query_1	TRUE	6.93e-05	7258	217	111	0.511521	0.0152935	TF:M05301	TF	Factor: CPBP; motif: NGGGCGG	21700	550	TF:M00000	TF,TF,TF,TF,TF,TF,TF,TF,TF,TF,TF,TF,TF,TF,TF,TF,TF,TF,TF,TF,TF,TF,TF,TF,TF,TF,TF,TF,TF,TF,TF,TF,TF,TF,TF,TF,TF,TF,TF,TF,TF,TF,TF,TF,TF,TF,TF,TF,TF,TF,TF,TF,TF,TF,TF,TF,TF,TF,TF,TF,TF,TF,TF,TF,TF,TF,TF,TF,TF,TF,TF,TF,TF,TF,TF,TF,TF,TF,TF,TF,TF,TF,TF,TF,TF,TF,TF,TF,TF,TF,TF,TF,TF,TF,TF,TF,TF,TF,TF,TF,TF,TF,TF,TF,TF,TF,TF,TF,TF,TF,TF	Tmem74b,Fbxl16,Exoc6b,Ccdc6,Farp1,Kpna4,Pld3,Cdk5r2,Nmt2,Enpp1,Tpi1,Klkb1,Kif5c,Ptpn6,Prkar2b,Ptpn11,Cd81,Acvr1,Crkl,Impdh1,Nek1,Pkm,Tyro3,Opa1,Gmeb2,Timm10,Prkacb,Tuba4a,Sms,Smad5,Prkcz,2300009A05Rik,Dok7,Pip4p1,Tmem109,Spout1,Arglu1,Prrc1,Klhdc2,Myo16,Arcn1,Rai1,Abcg1,Grm4,Dusp23,Myh14,Ranbp10,Cyfip1,Pdk1,Ptbp3,Bmp3,Serinc5,Slc9a7,Mon1b,Neto2,Pgghg,Ttc12,Tctn1,Casp9,Gatad2a,Angel2,Znfx1,Ubac2,S…	0.015
85	query_1	TRUE	6.93e-05	7258	217	111	0.511521	0.0152935	TF:M05665	TF	Factor: Sp3; motif: AGGGCGG	21700	3340	TF:M00000	TF,TF,TF,TF,TF,TF,TF,TF,TF,TF,TF,TF,TF,TF,TF,TF,TF,TF,TF,TF,TF,TF,TF,TF,TF,TF,TF,TF,TF,TF,TF,TF,TF,TF,TF,TF,TF,TF,TF,TF,TF,TF,TF,TF,TF,TF,TF,TF,TF,TF,TF,TF,TF,TF,TF,TF,TF,TF,TF,TF,TF,TF,TF,TF,TF,TF,TF,TF,TF,TF,TF,TF,TF,TF,TF,TF,TF,TF,TF,TF,TF,TF,TF,TF,TF,TF,TF,TF,TF,TF,TF,TF,TF,TF,TF,TF,TF,TF,TF,TF,TF,TF,TF,TF,TF,TF,TF,TF,TF,TF,TF	Tmem74b,Fbxl16,Exoc6b,Ccdc6,Farp1,Kpna4,Pld3,Cdk5r2,Nmt2,Enpp1,Tpi1,Klkb1,Kif5c,Ptpn6,Prkar2b,Ptpn11,Cd81,Acvr1,Crkl,Impdh1,Nek1,Pkm,Tyro3,Opa1,Gmeb2,Timm10,Prkacb,Tuba4a,Sms,Smad5,Prkcz,2300009A05Rik,Dok7,Pip4p1,Tmem109,Spout1,Arglu1,Prrc1,Klhdc2,Myo16,Arcn1,Rai1,Abcg1,Grm4,Dusp23,Myh14,Ranbp10,Cyfip1,Pdk1,Ptbp3,Bmp3,Serinc5,Slc9a7,Mon1b,Neto2,Pgghg,Ttc12,Tctn1,Casp9,Gatad2a,Angel2,Znfx1,Ubac2,S…	0.015
86	query_1	TRUE	6.93e-05	7258	217	111	0.511521	0.0152935	TF:M05455	TF	Factor: SP6; motif: WGGGCGG	21700	3360	TF:M00000	TF,TF,TF,TF,TF,TF,TF,TF,TF,TF,TF,TF,TF,TF,TF,TF,TF,TF,TF,TF,TF,TF,TF,TF,TF,TF,TF,TF,TF,TF,TF,TF,TF,TF,TF,TF,TF,TF,TF,TF,TF,TF,TF,TF,TF,TF,TF,TF,TF,TF,TF,TF,TF,TF,TF,TF,TF,TF,TF,TF,TF,TF,TF,TF,TF,TF,TF,TF,TF,TF,TF,TF,TF,TF,TF,TF,TF,TF,TF,TF,TF,TF,TF,TF,TF,TF,TF,TF,TF,TF,TF,TF,TF,TF,TF,TF,TF,TF,TF,TF,TF,TF,TF,TF,TF,TF,TF,TF,TF,TF,TF	Tmem74b,Fbxl16,Exoc6b,Ccdc6,Farp1,Kpna4,Pld3,Cdk5r2,Nmt2,Enpp1,Tpi1,Klkb1,Kif5c,Ptpn6,Prkar2b,Ptpn11,Cd81,Acvr1,Crkl,Impdh1,Nek1,Pkm,Tyro3,Opa1,Gmeb2,Timm10,Prkacb,Tuba4a,Sms,Smad5,Prkcz,2300009A05Rik,Dok7,Pip4p1,Tmem109,Spout1,Arglu1,Prrc1,Klhdc2,Myo16,Arcn1,Rai1,Abcg1,Grm4,Dusp23,Myh14,Ranbp10,Cyfip1,Pdk1,Ptbp3,Bmp3,Serinc5,Slc9a7,Mon1b,Neto2,Pgghg,Ttc12,Tctn1,Casp9,Gatad2a,Angel2,Znfx1,Ubac2,S…	0.015
87	query_1	TRUE	0.000111675	9030	217	129	0.59447	0.0142857	TF:M01981_1	TF	Factor: ELK-1; motif: ACCGGAWRTN; match class: 1	21700	931	TF:M01981	TF,TF,TF,TF,TF,TF,TF,TF,TF,TF,TF,TF,TF,TF,TF,TF,TF,TF,TF,TF,TF,TF,TF,TF,TF,TF,TF,TF,TF,TF,TF,TF,TF,TF,TF,TF,TF,TF,TF,TF,TF,TF,TF,TF,TF,TF,TF,TF,TF,TF,TF,TF,TF,TF,TF,TF,TF,TF,TF,TF,TF,TF,TF,TF,TF,TF,TF,TF,TF,TF,TF,TF,TF,TF,TF,TF,TF,TF,TF,TF,TF,TF,TF,TF,TF,TF,TF,TF,TF,TF,TF,TF,TF,TF,TF,TF,TF,TF,TF,TF,TF,TF,TF,TF,TF,TF,TF,TF,TF,TF,TF,TF,TF,TF,TF,TF,TF,TF,TF,TF,TF,TF,TF,TF,TF,TF,TF,TF,TF	Tmem74b,Fbxl16,Ccdc6,Rsbn1l,Pcdh10,Wdfy1,Farp1,Ro60,Ntn1,Kpna4,Kpna6,Pld3,Cdk5r2,Nmt2,Dhcr7,Gosr1,Pomc,Got2,Enpp1,Cd44,Ap2a2,Tpi1,Pcgf2,Kif5c,Prkar2b,Ptpn11,Por,Acvr1,Crkl,Nek1,Tyro3,Golga3,Mrps21,Timm10,Prkacb,Tuba4a,Cdh10,Erf,Sms,Smad5,Prkcz,Pip4p1,Tmem109,Spout1,Slc25a31,Klhdc2,Myo16,Arcn1,Crhbp,Rai1,Grm4,Isy1,Dusp23,Cyfip1,Fbxo11,Gtf2a2,Pdk1,Fam210a,Ano10,Ptbp3,Atcay,Serinc5,Mon1b,Pgghg,Tsku,…	0.014
88	query_1	TRUE	0.000115315	9829	217	137	0.631336	0.0139383	TF:M00025	TF	Factor: Elk-1; motif: NNNNCCGGAARTNN	21700	924	TF:M00000	TF,TF,TF,TF,TF,TF,TF,TF,TF,TF,TF,TF,TF,TF,TF,TF,TF,TF,TF,TF,TF,TF,TF,TF,TF,TF,TF,TF,TF,TF,TF,TF,TF,TF,TF,TF,TF,TF,TF,TF,TF,TF,TF,TF,TF,TF,TF,TF,TF,TF,TF,TF,TF,TF,TF,TF,TF,TF,TF,TF,TF,TF,TF,TF,TF,TF,TF,TF,TF,TF,TF,TF,TF,TF,TF,TF,TF,TF,TF,TF,TF,TF,TF,TF,TF,TF,TF,TF,TF,TF,TF,TF,TF,TF,TF,TF,TF,TF,TF,TF,TF,TF,TF,TF,TF,TF,TF,TF,TF,TF,TF,TF,TF,TF,TF,TF,TF,TF,TF,TF,TF,TF,TF,TF,TF,TF,TF,TF,TF,TF,TF,TF,TF,…	Tmem74b,Fbxl16,Ccdc6,Rsbn1l,Pigg,Wdfy1,Nfxl1,Farp1,Ro60,Pld3,Cdk5r2,Nmt2,Dhcr7,Gosr1,Enpp1,Cd44,Ap2a2,Lsp1,Ndn,Fas,Kif5c,Prkar2b,Ptpn11,Acvr1,Crkl,Impdh1,Nek1,Tyro3,Golga3,Acyp2,Mrps21,Opa1,Gmeb2,Timm10,Prkacb,Tuba4a,Adcyap1r1,Cdh10,Erf,Sms,Prkcz,Dlk1,2300009A05Rik,Tmem109,Spout1,Arglu1,Slc25a31,Samd5,Klhdc2,Myo16,Arcn1,Crhbp,Rai1,Grm4,Isy1,Dusp23,Cyfip1,Fbxo11,Actn1,Gtf2a2,Pdk1,Fam210a,Ano10,Ptb…	0.014
89	query_1	TRUE	0.000130978	10354	217	142	0.654378	0.0137145	TF:M02090	TF	Factor: E2F-4; motif: GCGGGAAANA	21700	778	TF:M00000	TF,TF,TF,TF,TF,TF,TF,TF,TF,TF,TF,TF,TF,TF,TF,TF,TF,TF,TF,TF,TF,TF,TF,TF,TF,TF,TF,TF,TF,TF,TF,TF,TF,TF,TF,TF,TF,TF,TF,TF,TF,TF,TF,TF,TF,TF,TF,TF,TF,TF,TF,TF,TF,TF,TF,TF,TF,TF,TF,TF,TF,TF,TF,TF,TF,TF,TF,TF,TF,TF,TF,TF,TF,TF,TF,TF,TF,TF,TF,TF,TF,TF,TF,TF,TF,TF,TF,TF,TF,TF,TF,TF,TF,TF,TF,TF,TF,TF,TF,TF,TF,TF,TF,TF,TF,TF,TF,TF,TF,TF,TF,TF,TF,TF,TF,TF,TF,TF,TF,TF,TF,TF,TF,TF,TF,TF,TF,TF,TF,TF,TF,TF,TF,…	Tmem74b,Fbxl16,Exoc6b,Ccdc6,Pigg,Pcdh10,Cacna1i,Nfxl1,Farp1,Ro60,Ntn1,Gclm,Ddt,Kpna4,Pld3,Cdk5r2,Nmt2,Dhcr7,Gosr1,Pomc,Got2,Enpp1,Cd44,Ap2a2,Tpi1,Pcgf2,Kif5c,Ptpn11,Cd81,Acvr1,Crkl,Impdh1,Pkm,Golga3,Acyp2,Opa1,Prkacb,Tuba4a,Adcyap1r1,Hnrnph2,Erf,Sms,Cacna1c,Prkcz,Anxa7,Dlk1,2300009A05Rik,Dok7,Spout1,Arglu1,Prrc1,Nr1d1,Slc25a31,Samd5,Klhdc2,Lrrk2,Arcn1,Rai1,Grm4,Ripor1,Arhgap23,Dusp23,Ranbp10,Fbxo…	0.014
90	query_1	TRUE	0.000140319	9356	217	132	0.608295	0.0141086	TF:M08995_1	TF	Factor: CTCF; motif: NAGGGGGCGCNNKNNNN; match class: 1	21700	623	TF:M08995	TF,TF,TF,TF,TF,TF,TF,TF,TF,TF,TF,TF,TF,TF,TF,TF,TF,TF,TF,TF,TF,TF,TF,TF,TF,TF,TF,TF,TF,TF,TF,TF,TF,TF,TF,TF,TF,TF,TF,TF,TF,TF,TF,TF,TF,TF,TF,TF,TF,TF,TF,TF,TF,TF,TF,TF,TF,TF,TF,TF,TF,TF,TF,TF,TF,TF,TF,TF,TF,TF,TF,TF,TF,TF,TF,TF,TF,TF,TF,TF,TF,TF,TF,TF,TF,TF,TF,TF,TF,TF,TF,TF,TF,TF,TF,TF,TF,TF,TF,TF,TF,TF,TF,TF,TF,TF,TF,TF,TF,TF,TF,TF,TF,TF,TF,TF,TF,TF,TF,TF,TF,TF,TF,TF,TF,TF,TF,TF,TF,TF,TF,TF	Dhtkd1,Tmem74b,Fbxl16,Ccdc6,Rsbn1l,Wdfy1,Cacna1i,Nfxl1,Farp1,Ntn1,Ddt,Kpna4,Cdk5r2,Nmt2,Dhcr7,Pomc,Mb,Got2,Enpp1,Klk1,Ap2a2,Lsp1,Pcgf2,Fas,Prkar2b,Ptpn11,Cd81,Por,Acvr1,Crkl,Impdh1,Nek1,Pkm,Tyro3,Prkacb,Tuba4a,Adcyap1r1,Cdh10,Erf,Sms,Smad5,Cacna1c,Prkcz,Anxa7,Dlk1,2300009A05Rik,Dok7,Pip4p1,Arglu1,Nr1d1,Slc25a31,Klhdc2,Lrrk2,Crhbp,Rai1,Abcg1,Grm4,Ripor1,Arhgap23,Dusp23,Mtss2,Myh14,Ranbp10,Fbxo11,A…	0.014
91	query_1	TRUE	0.000187333	7013	217	107	0.493088	0.0152574	TF:M00470	TF	Factor: AP-2gamma; motif: GCCYNNGGS	21700	102	TF:M00000	TF,TF,TF,TF,TF,TF,TF,TF,TF,TF,TF,TF,TF,TF,TF,TF,TF,TF,TF,TF,TF,TF,TF,TF,TF,TF,TF,TF,TF,TF,TF,TF,TF,TF,TF,TF,TF,TF,TF,TF,TF,TF,TF,TF,TF,TF,TF,TF,TF,TF,TF,TF,TF,TF,TF,TF,TF,TF,TF,TF,TF,TF,TF,TF,TF,TF,TF,TF,TF,TF,TF,TF,TF,TF,TF,TF,TF,TF,TF,TF,TF,TF,TF,TF,TF,TF,TF,TF,TF,TF,TF,TF,TF,TF,TF,TF,TF,TF,TF,TF,TF,TF,TF,TF,TF,TF,TF	Dhtkd1,Tmem74b,Pigg,Pcdh10,Wdfy1,Cacna1i,Nfxl1,Farp1,Ro60,Ntn1,Gclm,Kpna6,Cdk5r2,Nmt2,Got2,Enpp1,Cd44,Ap2a2,Tpi1,Lsp1,Pcgf2,Ptpn6,Prkar2b,Ptpn11,Cd81,Por,Acvr1,Crkl,Impdh1,Tyro3,Golga3,Acyp2,Prkacb,Tuba4a,Adcyap1r1,Nos3,Erf,Smad5,Cacna1c,Prkcz,Dlk1,2300009A05Rik,Pip4p1,2510002D24Rik,Tmem109,Arglu1,Samd5,Klhdc2,Myo16,Abcg1,Grm4,Ripor1,Arhgap23,Isy1,Cyp4x1,Mtss2,Myh14,Fbxo11,Actn1,Ptbp3,Mon1b,Neto2…	0.015
92	query_1	TRUE	0.000195435	9500	217	133	0.612903	0.014	TF:M02835	TF	Factor: Zic1; motif: NNCCCCCGGGGGGG	21700	4238	TF:M00000	TF,TF,TF,TF,TF,TF,TF,TF,TF,TF,TF,TF,TF,TF,TF,TF,TF,TF,TF,TF,TF,TF,TF,TF,TF,TF,TF,TF,TF,TF,TF,TF,TF,TF,TF,TF,TF,TF,TF,TF,TF,TF,TF,TF,TF,TF,TF,TF,TF,TF,TF,TF,TF,TF,TF,TF,TF,TF,TF,TF,TF,TF,TF,TF,TF,TF,TF,TF,TF,TF,TF,TF,TF,TF,TF,TF,TF,TF,TF,TF,TF,TF,TF,TF,TF,TF,TF,TF,TF,TF,TF,TF,TF,TF,TF,TF,TF,TF,TF,TF,TF,TF,TF,TF,TF,TF,TF,TF,TF,TF,TF,TF,TF,TF,TF,TF,TF,TF,TF,TF,TF,TF,TF,TF,TF,TF,TF,TF,TF,TF,TF,TF,TF	Tmem74b,Fbxl16,Exoc6b,Ccdc6,Pigg,Wdfy1,Cacna1i,Nfxl1,Farp1,Ro60,Ntn1,Gclm,Kpna4,Kpna6,Pld3,Cdk5r2,Dhcr7,Pomc,Mb,Got2,Enpp1,Cd44,Klk1,Lsp1,Pcgf2,Kif5c,Ptpn6,Prkar2b,Ptpn11,Cd81,Impdh1,Tyro3,Golga3,Gmeb2,Timm10,Prkacb,Tuba4a,Adcyap1r1,Hnrnph2,Cdh10,Erf,Sms,Smad5,Cacna1c,Dlk1,Dok7,Tmem109,Arglu1,Prrc1,Nr1d1,Slc25a31,Samd5,Klhdc2,Myo16,Crhbp,Rai1,Abcg1,Grm4,Ripor1,Arhgap23,Cyp4x1,Dusp23,Myh14,Fbxo11,…	0.014
93	query_1	TRUE	0.00026545	7333	217	110	0.506912	0.0150007	TF:M10278	TF	Factor: KLF3; motif: NNNNNNGGGCGGGGCNNGN	21700	1874	TF:M00000	TF,TF,TF,TF,TF,TF,TF,TF,TF,TF,TF,TF,TF,TF,TF,TF,TF,TF,TF,TF,TF,TF,TF,TF,TF,TF,TF,TF,TF,TF,TF,TF,TF,TF,TF,TF,TF,TF,TF,TF,TF,TF,TF,TF,TF,TF,TF,TF,TF,TF,TF,TF,TF,TF,TF,TF,TF,TF,TF,TF,TF,TF,TF,TF,TF,TF,TF,TF,TF,TF,TF,TF,TF,TF,TF,TF,TF,TF,TF,TF,TF,TF,TF,TF,TF,TF,TF,TF,TF,TF,TF,TF,TF,TF,TF,TF,TF,TF,TF,TF,TF,TF,TF,TF,TF,TF,TF,TF,TF,TF	Dhtkd1,Tmem74b,Fbxl16,Exoc6b,Ccdc6,Rsbn1l,Pcdh10,Cacna1i,Farp1,Ro60,Gclm,Ddt,Kpna4,Cdk5r2,Nmt2,Dhcr7,Enpp1,Ap2a2,Fas,Prkar2b,Ptpn11,Cd81,Por,Acvr1,Impdh1,Nek1,Pkm,Golga3,Tuba4a,Adcyap1r1,Nos3,Erf,Sms,Cacna1c,Prkcz,Dlk1,Dok7,Pip4p1,Arglu1,Slc25a31,Myo16,Lrrk2,Arcn1,Crhbp,Rai1,Abcg1,Ripor1,Arhgap23,Dusp23,Mtss2,Ranbp10,Fbxo11,Actn1,Ano10,Ptbp3,Serinc5,Dlgap2,Slc9a7,Neto2,Armc6,Pgghg,Ttc12,Tctn1,Cas…	0.015
94	query_1	TRUE	0.000394502	8809	217	125	0.576037	0.01419	TF:M00196	TF	Factor: Sp1; motif: NGGGGGCGGGGYN	21700	3330	TF:M00000	TF,TF,TF,TF,TF,TF,TF,TF,TF,TF,TF,TF,TF,TF,TF,TF,TF,TF,TF,TF,TF,TF,TF,TF,TF,TF,TF,TF,TF,TF,TF,TF,TF,TF,TF,TF,TF,TF,TF,TF,TF,TF,TF,TF,TF,TF,TF,TF,TF,TF,TF,TF,TF,TF,TF,TF,TF,TF,TF,TF,TF,TF,TF,TF,TF,TF,TF,TF,TF,TF,TF,TF,TF,TF,TF,TF,TF,TF,TF,TF,TF,TF,TF,TF,TF,TF,TF,TF,TF,TF,TF,TF,TF,TF,TF,TF,TF,TF,TF,TF,TF,TF,TF,TF,TF,TF,TF,TF,TF,TF,TF,TF,TF,TF,TF,TF,TF,TF,TF,TF,TF,TF,TF,TF,TF	Tmem74b,Fbxl16,Exoc6b,Ccdc6,Rsbn1l,Pigg,Pcdh10,Cacna1i,Farp1,Ro60,Gclm,Ddt,Kpna4,Nmt2,Dhcr7,Enpp1,Ap2a2,Tpi1,Lsp1,Pcgf2,Fas,Ptpn11,Cd81,Por,Acvr1,Impdh1,Nek1,Pkm,Golga3,Acyp2,Tuba4a,Adcyap1r1,Nos3,Erf,Sms,Cacna1c,Prkcz,Dlk1,2300009A05Rik,Dok7,Pip4p1,Arglu1,Slc25a31,Myo16,Lrrk2,Arcn1,Crhbp,Rai1,Abcg1,Ripor1,Arhgap23,Dusp23,Mtss2,Ranbp10,Cyfip1,Fbxo11,Actn1,Pdk1,Ano10,Ptbp3,Atcay,Bmp3,Serinc5,Dlgap…	0.014
95	query_1	TRUE	0.000491669	9528	217	132	0.608295	0.0138539	TF:M02933	TF	Factor: ZF5; motif: GYCGCGCARNGCNN	21700	3950	TF:M00000	TF,TF,TF,TF,TF,TF,TF,TF,TF,TF,TF,TF,TF,TF,TF,TF,TF,TF,TF,TF,TF,TF,TF,TF,TF,TF,TF,TF,TF,TF,TF,TF,TF,TF,TF,TF,TF,TF,TF,TF,TF,TF,TF,TF,TF,TF,TF,TF,TF,TF,TF,TF,TF,TF,TF,TF,TF,TF,TF,TF,TF,TF,TF,TF,TF,TF,TF,TF,TF,TF,TF,TF,TF,TF,TF,TF,TF,TF,TF,TF,TF,TF,TF,TF,TF,TF,TF,TF,TF,TF,TF,TF,TF,TF,TF,TF,TF,TF,TF,TF,TF,TF,TF,TF,TF,TF,TF,TF,TF,TF,TF,TF,TF,TF,TF,TF,TF,TF,TF,TF,TF,TF,TF,TF,TF,TF,TF,TF,TF,TF,TF,TF	Tmem74b,Fbxl16,Exoc6b,Ccdc6,Rsbn1l,Pcdh10,Cacna1i,Nfxl1,Farp1,Ro60,Ntn1,Gclm,Kpna4,Kpna6,Pld3,Cdk5r2,Nmt2,Dhcr7,Got2,Ap2a2,Lsp1,Pcgf2,Kif5c,Prkar2b,Ptpn11,Cd81,Acvr1,Crkl,Impdh1,Nek1,Golga3,Gmeb2,Prkacb,Tuba4a,Adcyap1r1,Hnrnph2,Erf,Sms,Smad5,Cacna1c,Prkcz,Anxa7,Dlk1,2300009A05Rik,Dok7,Arglu1,Prrc1,Slc25a31,Samd5,Myo16,Lrrk2,Arcn1,Rai1,Abcg1,Grm4,Ripor1,Arhgap23,Dusp23,Mtss2,Myh14,Cyfip1,Fbxo11,Ac…	0.014
96	query_1	TRUE	0.000621731	8102	217	117	0.539171	0.0144409	TF:M02872_1	TF	Factor: IRF4; motif: NNNAYTCTCGGWNNN; match class: 1	21700	1787	TF:M02872	TF,TF,TF,TF,TF,TF,TF,TF,TF,TF,TF,TF,TF,TF,TF,TF,TF,TF,TF,TF,TF,TF,TF,TF,TF,TF,TF,TF,TF,TF,TF,TF,TF,TF,TF,TF,TF,TF,TF,TF,TF,TF,TF,TF,TF,TF,TF,TF,TF,TF,TF,TF,TF,TF,TF,TF,TF,TF,TF,TF,TF,TF,TF,TF,TF,TF,TF,TF,TF,TF,TF,TF,TF,TF,TF,TF,TF,TF,TF,TF,TF,TF,TF,TF,TF,TF,TF,TF,TF,TF,TF,TF,TF,TF,TF,TF,TF,TF,TF,TF,TF,TF,TF,TF,TF,TF,TF,TF,TF,TF,TF,TF,TF,TF,TF,TF,TF	Gm5938,Tmem74b,Fbxl16,Exoc6b,Rsbn1l,Pigg,Pcdh10,Or51v14,Wdfy1,Cacna1i,Ro60,Ntn1,Gclm,Kpna4,Cdk5r2,Nmt2,Gosr1,Mb,Got2,Ap2a2,Pcgf2,Fas,Kif5c,Prkar2b,Cd81,Por,Crkl,Pkm,Tyro3,Golga3,Opa1,Prkacb,Tuba4a,Hnrnph2,Cdh10,Cacna1c,Prkcz,2510002D24Rik,Tmem109,Spout1,Prrc1,Slc25a31,Samd5,Klhdc2,Crhbp,Grm4,Ripor1,Isy1,Cyp4x1,Mtss2,Cyfip1,Fbxo11,Fam210a,Ptbp3,Atcay,Serinc5,Dlgap2,Slc9a7,Srp68,Rab3gap2,Neto2,Armc…	0.014
97	query_1	TRUE	0.000682323	6360	217	98	0.451613	0.0154088	TF:M01199	TF	Factor: RNF96; motif: BCCCGCRGCC	21700	3000	TF:M00000	TF,TF,TF,TF,TF,TF,TF,TF,TF,TF,TF,TF,TF,TF,TF,TF,TF,TF,TF,TF,TF,TF,TF,TF,TF,TF,TF,TF,TF,TF,TF,TF,TF,TF,TF,TF,TF,TF,TF,TF,TF,TF,TF,TF,TF,TF,TF,TF,TF,TF,TF,TF,TF,TF,TF,TF,TF,TF,TF,TF,TF,TF,TF,TF,TF,TF,TF,TF,TF,TF,TF,TF,TF,TF,TF,TF,TF,TF,TF,TF,TF,TF,TF,TF,TF,TF,TF,TF,TF,TF,TF,TF,TF,TF,TF,TF,TF,TF	Tmem74b,Fbxl16,Ccdc6,Rsbn1l,Pcdh10,Cacna1i,Nfxl1,Farp1,Kpna4,Kpna6,Cdk5r2,Nmt2,Gosr1,Pomc,Cd44,Ap2a2,Tpi1,Pcgf2,Kif5c,Prkar2b,Ptpn11,Por,Acvr1,Impdh1,Pkm,Gmeb2,Prkacb,Adcyap1r1,Erf,Sms,Smad5,Cacna1c,Prkcz,Dlk1,Dok7,Pip4p1,2510002D24Rik,Arglu1,Prrc1,Nr1d1,Samd5,Klhdc2,Myo16,Abcg1,Grm4,Ripor1,Mtss2,Myh14,Fbxo11,Gtf2a2,Pdk1,Ptbp3,Slc9a7,Srp68,Mon1b,Neto2,Tctn1,Casp9,Sik2,Dpyd,Gatad2a,Cmc2,Angel2,Pph…	0.015
98	query_1	TRUE	0.000752694	7656	217	112	0.516129	0.014629	TF:M01104	TF	Factor: MOVO-B; motif: GNGGGGG	21700	2160	TF:M00000	TF,TF,TF,TF,TF,TF,TF,TF,TF,TF,TF,TF,TF,TF,TF,TF,TF,TF,TF,TF,TF,TF,TF,TF,TF,TF,TF,TF,TF,TF,TF,TF,TF,TF,TF,TF,TF,TF,TF,TF,TF,TF,TF,TF,TF,TF,TF,TF,TF,TF,TF,TF,TF,TF,TF,TF,TF,TF,TF,TF,TF,TF,TF,TF,TF,TF,TF,TF,TF,TF,TF,TF,TF,TF,TF,TF,TF,TF,TF,TF,TF,TF,TF,TF,TF,TF,TF,TF,TF,TF,TF,TF,TF,TF,TF,TF,TF,TF,TF,TF,TF,TF,TF,TF,TF,TF,TF,TF,TF,TF,TF,TF	Tmem74b,Fbxl16,Ccdc6,Rsbn1l,Pigg,Wdfy1,Cacna1i,Farp1,Gclm,Kpna4,Cdk5r2,Nmt2,Dhcr7,Enpp1,Ap2a2,Lsp1,Pcgf2,Fas,Kif5c,Prkar2b,Ptpn11,Por,Acvr1,Impdh1,Nek1,Pkm,Gmeb2,Prkacb,Tuba4a,Adcyap1r1,Cdh10,Erf,Sms,Cacna1c,Prkcz,Dlk1,2300009A05Rik,Dok7,Arglu1,Prrc1,Slc25a31,Myo16,Lrrk2,Arcn1,Crhbp,Rai1,Abcg1,Arhgap23,Cyp4x1,Dusp23,Myh14,Ranbp10,Cyfip1,Fbxo11,Actn1,Gtf2a2,Pdk1,Ano10,Ptbp3,Dlgap2,Slc9a7,Srp68,Rab…	0.015
99	query_1	TRUE	0.000834284	15289	217	184	0.847926	0.0120348	TF:M07289	TF	Factor: GKLF; motif: NNNRGGNGNGGSN	21700	1378	TF:M00000	TF,TF,TF,TF,TF,TF,TF,TF,TF,TF,TF,TF,TF,TF,TF,TF,TF,TF,TF,TF,TF,TF,TF,TF,TF,TF,TF,TF,TF,TF,TF,TF,TF,TF,TF,TF,TF,TF,TF,TF,TF,TF,TF,TF,TF,TF,TF,TF,TF,TF,TF,TF,TF,TF,TF,TF,TF,TF,TF,TF,TF,TF,TF,TF,TF,TF,TF,TF,TF,TF,TF,TF,TF,TF,TF,TF,TF,TF,TF,TF,TF,TF,TF,TF,TF,TF,TF,TF,TF,TF,TF,TF,TF,TF,TF,TF,TF,TF,TF,TF,TF,TF,TF,TF,TF,TF,TF,TF,TF,TF,TF,TF,TF,TF,TF,TF,TF,TF,TF,TF,TF,TF,TF,TF,TF,TF,TF,TF,TF,TF,TF,TF,TF,…	Tmem74b,Fbxl16,Exoc6b,Ccdc6,Rsbn1l,Pigg,Pcdh10,Wdfy1,Cacna1i,Farp1,Ro60,Ntn1,Gclm,Ddt,Kpna4,Pld3,Cdk5r2,Nmt2,Dhcr7,Pomc,Mb,Enpp1,Cd44,Klk1,Klk1b22,Ap2a2,Tpi1,Lsp1,Pcgf2,Fas,Kif5c,Ptpn6,Prkar2b,Ptpn11,Cd81,Por,Acvr1,Impdh1,Nek1,Pkm,Golga3,Acyp2,Mrps21,Opa1,Gmeb2,Prkacb,Tuba4a,Adcyap1r1,Nos3,Hnrnph2,Cdh10,Erf,Smad5,Cacna1c,Prkcz,Anxa7,Dlk1,2300009A05Rik,Dok7,Pip4p1,2510002D24Rik,Tmem109,Spout1,Argl…	0.012
100	query_1	TRUE	0.00114527	14495	217	177	0.815668	0.0122111	TF:M02872	TF	Factor: IRF4; motif: NNNAYTCTCGGWNNN	21700	1786	TF:M00000	TF,TF,TF,TF,TF,TF,TF,TF,TF,TF,TF,TF,TF,TF,TF,TF,TF,TF,TF,TF,TF,TF,TF,TF,TF,TF,TF,TF,TF,TF,TF,TF,TF,TF,TF,TF,TF,TF,TF,TF,TF,TF,TF,TF,TF,TF,TF,TF,TF,TF,TF,TF,TF,TF,TF,TF,TF,TF,TF,TF,TF,TF,TF,TF,TF,TF,TF,TF,TF,TF,TF,TF,TF,TF,TF,TF,TF,TF,TF,TF,TF,TF,TF,TF,TF,TF,TF,TF,TF,TF,TF,TF,TF,TF,TF,TF,TF,TF,TF,TF,TF,TF,TF,TF,TF,TF,TF,TF,TF,TF,TF,TF,TF,TF,TF,TF,TF,TF,TF,TF,TF,TF,TF,TF,TF,TF,TF,TF,TF,TF,TF,TF,TF,…	Gm5938,Dhtkd1,Tmem74b,Fbxl16,Exoc6b,Ccdc6,Rsbn1l,Pigg,Pcdh10,Or51v14,Wdfy1,Cacna1i,Farp1,Ro60,Ntn1,Gclm,Ddt,Kpna4,Cdk5r2,Nmt2,Gosr1,Mb,Got2,Cd44,Ap2a2,Tpi1,Lsp1,Pcgf2,Ndn,Fas,Klkb1,Kif5c,Ptpn6,Prkar2b,Ptpn11,Cd81,Por,Acvr1,Crkl,Impdh1,Nek1,Pkm,Tyro3,Golga3,Mrps21,Opa1,Gmeb2,Timm10,Prkacb,Tuba4a,Adcyap1r1,Nos3,Hnrnph2,Cdh10,Cacna1c,Prkcz,Anxa7,Dlk1,2510002D24Rik,Tmem109,Spout1,Prrc1,Nr1d1,Gpr149,S…	0.012
101	query_1	TRUE	0.0011473	6971	217	104	0.479263	0.014919	TF:M01979	TF	Factor: ELF4; motif: CCCGGAARTN	21700	910	TF:M00000	TF,TF,TF,TF,TF,TF,TF,TF,TF,TF,TF,TF,TF,TF,TF,TF,TF,TF,TF,TF,TF,TF,TF,TF,TF,TF,TF,TF,TF,TF,TF,TF,TF,TF,TF,TF,TF,TF,TF,TF,TF,TF,TF,TF,TF,TF,TF,TF,TF,TF,TF,TF,TF,TF,TF,TF,TF,TF,TF,TF,TF,TF,TF,TF,TF,TF,TF,TF,TF,TF,TF,TF,TF,TF,TF,TF,TF,TF,TF,TF,TF,TF,TF,TF,TF,TF,TF,TF,TF,TF,TF,TF,TF,TF,TF,TF,TF,TF,TF,TF,TF,TF,TF,TF	Tmem74b,Ccdc6,Pigg,Wdfy1,Nfxl1,Farp1,Ro60,Pld3,Nmt2,Dhcr7,Gosr1,Enpp1,Lsp1,Fas,Prkar2b,Ptpn11,Acvr1,Tyro3,Golga3,Acyp2,Mrps21,Opa1,Gmeb2,Timm10,Prkacb,Adcyap1r1,Sms,Prkcz,Dlk1,Tmem109,Arglu1,Samd5,Klhdc2,Arcn1,Crhbp,Rai1,Grm4,Isy1,Dusp23,Cyfip1,Gtf2a2,Fam210a,Ptbp3,Serinc5,Rab3gap2,Mon1b,Armc6,Casp9,Sik2,Aqr,Dpyd,Gatad2a,Pphln1,Aldh1l1,Znfx1,Ubac2,Zc3h10,Gle1,2310022A10Rik,Rttn,Tmx1,Gtf2h3,Ubac1,…	0.015
102	query_1	TRUE	0.00115256	8959	217	125	0.576037	0.0139524	TF:M00932	TF	Factor: Sp1; motif: NNGGGGCGGGGNN	21700	3328	TF:M00000	TF,TF,TF,TF,TF,TF,TF,TF,TF,TF,TF,TF,TF,TF,TF,TF,TF,TF,TF,TF,TF,TF,TF,TF,TF,TF,TF,TF,TF,TF,TF,TF,TF,TF,TF,TF,TF,TF,TF,TF,TF,TF,TF,TF,TF,TF,TF,TF,TF,TF,TF,TF,TF,TF,TF,TF,TF,TF,TF,TF,TF,TF,TF,TF,TF,TF,TF,TF,TF,TF,TF,TF,TF,TF,TF,TF,TF,TF,TF,TF,TF,TF,TF,TF,TF,TF,TF,TF,TF,TF,TF,TF,TF,TF,TF,TF,TF,TF,TF,TF,TF,TF,TF,TF,TF,TF,TF,TF,TF,TF,TF,TF,TF,TF,TF,TF,TF,TF,TF,TF,TF,TF,TF,TF,TF	Tmem74b,Fbxl16,Exoc6b,Ccdc6,Rsbn1l,Pigg,Pcdh10,Cacna1i,Farp1,Ro60,Gclm,Ddt,Kpna4,Nmt2,Dhcr7,Enpp1,Ap2a2,Tpi1,Lsp1,Pcgf2,Fas,Ptpn11,Cd81,Por,Acvr1,Impdh1,Nek1,Pkm,Golga3,Acyp2,Gmeb2,Tuba4a,Adcyap1r1,Nos3,Erf,Sms,Cacna1c,Prkcz,Dlk1,2300009A05Rik,Dok7,Pip4p1,Arglu1,Slc25a31,Myo16,Lrrk2,Arcn1,Crhbp,Rai1,Abcg1,Ripor1,Arhgap23,Cyp4x1,Dusp23,Mtss2,Ranbp10,Cyfip1,Fbxo11,Actn1,Pdk1,Ano10,Ptbp3,Atcay,Bmp3,…	0.014
103	query_1	TRUE	0.00116424	4190	217	72	0.331797	0.0171838	TF:M00931_1	TF	Factor: Sp1; motif: GGGGCGGGGC; match class: 1	21700	3333	TF:M00931	TF,TF,TF,TF,TF,TF,TF,TF,TF,TF,TF,TF,TF,TF,TF,TF,TF,TF,TF,TF,TF,TF,TF,TF,TF,TF,TF,TF,TF,TF,TF,TF,TF,TF,TF,TF,TF,TF,TF,TF,TF,TF,TF,TF,TF,TF,TF,TF,TF,TF,TF,TF,TF,TF,TF,TF,TF,TF,TF,TF,TF,TF,TF,TF,TF,TF,TF,TF,TF,TF,TF,TF	Tmem74b,Fbxl16,Exoc6b,Ccdc6,Farp1,Ro60,Nmt2,Dhcr7,Enpp1,Ap2a2,Pcgf2,Fas,Ptpn11,Cd81,Acvr1,Impdh1,Nek1,Pkm,Tuba4a,Erf,2300009A05Rik,Dok7,Pip4p1,Arglu1,Slc25a31,Myo16,Arcn1,Rai1,Abcg1,Ripor1,Arhgap23,Dusp23,Ranbp10,Fbxo11,Actn1,Ano10,Ptbp3,Serinc5,Slc9a7,Neto2,Ttc12,Tctn1,Casp9,Sik2,Dpyd,Gatad2a,Cmc2,Angel2,Znfx1,Slco3a1,Ubac1,Dtnbp1,Sh3bp4,Ppp1r16a,Neurl1a,Smc6,Stk24,Zdhhc6,Chmp3,Gadd45gip1,Lage3,…	0.017
104	query_1	TRUE	0.00118911	6702	217	101	0.465438	0.0150701	TF:M05547	TF	Factor: ZAC; motif: KGGGCCR	21700	3882	TF:M00000	TF,TF,TF,TF,TF,TF,TF,TF,TF,TF,TF,TF,TF,TF,TF,TF,TF,TF,TF,TF,TF,TF,TF,TF,TF,TF,TF,TF,TF,TF,TF,TF,TF,TF,TF,TF,TF,TF,TF,TF,TF,TF,TF,TF,TF,TF,TF,TF,TF,TF,TF,TF,TF,TF,TF,TF,TF,TF,TF,TF,TF,TF,TF,TF,TF,TF,TF,TF,TF,TF,TF,TF,TF,TF,TF,TF,TF,TF,TF,TF,TF,TF,TF,TF,TF,TF,TF,TF,TF,TF,TF,TF,TF,TF,TF,TF,TF,TF,TF,TF,TF	Tmem74b,Exoc6b,Ccdc6,Pigg,Pcdh10,Wdfy1,Cacna1i,Nfxl1,Farp1,Gclm,Ddt,Kpna4,Kpna6,Cdk5r2,Nmt2,Got2,Ap2a2,Tpi1,Pcgf2,Fas,Kif5c,Prkar2b,Ptpn11,Cd81,Por,Acvr1,Impdh1,Opa1,Prkacb,Adcyap1r1,Cdh10,Erf,Sms,Smad5,Prkcz,Dlk1,2300009A05Rik,Dok7,Arglu1,Prrc1,Slc25a31,Samd5,Klhdc2,Arcn1,Rai1,Abcg1,Grm4,Arhgap23,Cyp4x1,Dusp23,Mtss2,Myh14,Cyfip1,Fbxo11,Actn1,Gtf2a2,Fam210a,Ano10,Slc9a7,Pgghg,Tctn1,Tmt1a,Tsku,Sik…	0.015
105	query_1	TRUE	0.00144483	2494	217	50	0.230415	0.0200481	TF:M07415_1	TF	Factor: Elf-1; motif: AWCCCGGAAGTN; match class: 1	21700	901	TF:M07415	TF,TF,TF,TF,TF,TF,TF,TF,TF,TF,TF,TF,TF,TF,TF,TF,TF,TF,TF,TF,TF,TF,TF,TF,TF,TF,TF,TF,TF,TF,TF,TF,TF,TF,TF,TF,TF,TF,TF,TF,TF,TF,TF,TF,TF,TF,TF,TF,TF,TF	Ccdc6,Nfxl1,Farp1,Pld3,Enpp1,Fas,Tyro3,Golga3,Mrps21,Timm10,Sms,Nr1d1,Samd5,Klhdc2,Grm4,Isy1,Dusp23,Gtf2a2,Fam210a,Ptbp3,Mon1b,Casp9,Sik2,Aqr,Gatad2a,Pphln1,Aldh1l1,Ubac2,2310022A10Rik,Ubac1,Bloc1s4,Cbr4,Ppp1r16a,Smc6,Eps8l2,Stk24,Zdhhc6,Chmp3,Rpa3,Lage3,Tomm34,Wars2,Cmtm6,Zcrb1,Crot,Stk4,Nqo2,Selenok,Srd5a3,Bnip3l	0.02
106	query_1	TRUE	0.0015437	5929	217	92	0.423963	0.015517	TF:M09682	TF	Factor: E2F-4; motif: GNNGGCGGGAAN	21700	772	TF:M00000	TF,TF,TF,TF,TF,TF,TF,TF,TF,TF,TF,TF,TF,TF,TF,TF,TF,TF,TF,TF,TF,TF,TF,TF,TF,TF,TF,TF,TF,TF,TF,TF,TF,TF,TF,TF,TF,TF,TF,TF,TF,TF,TF,TF,TF,TF,TF,TF,TF,TF,TF,TF,TF,TF,TF,TF,TF,TF,TF,TF,TF,TF,TF,TF,TF,TF,TF,TF,TF,TF,TF,TF,TF,TF,TF,TF,TF,TF,TF,TF,TF,TF,TF,TF,TF,TF,TF,TF,TF,TF,TF,TF	Dhtkd1,Tmem74b,Ccdc6,Rsbn1l,Pigg,Nfxl1,Ro60,Pld3,Nmt2,Dhcr7,Tpi1,Pcgf2,Prkar2b,Cd81,Por,Acvr1,Nek1,Pkm,Golga3,Timm10,Prkacb,Tuba4a,Adcyap1r1,Sms,Cacna1c,2300009A05Rik,Dok7,Pip4p1,Spout1,Arglu1,Slc25a31,Samd5,Klhdc2,Myo16,Crhbp,Rai1,Arhgap23,Isy1,Cyp4x1,Mtss2,Myh14,Fbxo11,Actn1,Fam210a,Ano10,Ptbp3,Serinc5,Rab3gap2,Mon1b,Tctn1,Tsku,Sik2,Dpyd,Gatad2a,Cmc2,Pphln1,Ablim1,Zc3h10,Slco3a1,2310022A10Rik,G…	0.016
107	query_1	TRUE	0.00225697	7902	217	113	0.520737	0.0143002	TF:M01989	TF	Factor: Ets2; motif: ACCGGAWRYN	21700	466	TF:M00000	TF,TF,TF,TF,TF,TF,TF,TF,TF,TF,TF,TF,TF,TF,TF,TF,TF,TF,TF,TF,TF,TF,TF,TF,TF,TF,TF,TF,TF,TF,TF,TF,TF,TF,TF,TF,TF,TF,TF,TF,TF,TF,TF,TF,TF,TF,TF,TF,TF,TF,TF,TF,TF,TF,TF,TF,TF,TF,TF,TF,TF,TF,TF,TF,TF,TF,TF,TF,TF,TF,TF,TF,TF,TF,TF,TF,TF,TF,TF,TF,TF,TF,TF,TF,TF,TF,TF,TF,TF,TF,TF,TF,TF,TF,TF,TF,TF,TF,TF,TF,TF,TF,TF,TF,TF,TF,TF,TF,TF,TF,TF,TF,TF	Ccdc6,Rsbn1l,Pigg,Wdfy1,Nfxl1,Farp1,Ro60,Pld3,Cdk5r2,Nmt2,Dhcr7,Gosr1,Enpp1,Cd44,Ap2a2,Lsp1,Ndn,Fas,Kif5c,Ptpn11,Crkl,Nek1,Tyro3,Golga3,Acyp2,Mrps21,Opa1,Gmeb2,Timm10,Prkacb,Tuba4a,Adcyap1r1,Cdh10,Sms,Cacna1c,Dlk1,2300009A05Rik,Tmem109,Spout1,Arglu1,Nr1d1,Slc25a31,Samd5,Klhdc2,Arcn1,Crhbp,Rai1,Grm4,Isy1,Dusp23,Cyfip1,Gtf2a2,Fam210a,Ano10,Ptbp3,Atcay,Serinc5,Rab3gap2,Mon1b,Neto2,Casp9,Tmt1a,Tsku,S…	0.014
108	query_1	TRUE	0.00225866	3140	217	58	0.267281	0.0184713	TF:M10278_1	TF	Factor: KLF3; motif: NNNNNNGGGCGGGGCNNGN; match class: 1	21700	1875	TF:M10278	TF,TF,TF,TF,TF,TF,TF,TF,TF,TF,TF,TF,TF,TF,TF,TF,TF,TF,TF,TF,TF,TF,TF,TF,TF,TF,TF,TF,TF,TF,TF,TF,TF,TF,TF,TF,TF,TF,TF,TF,TF,TF,TF,TF,TF,TF,TF,TF,TF,TF,TF,TF,TF,TF,TF,TF,TF,TF	Tmem74b,Fbxl16,Farp1,Ro60,Nmt2,Enpp1,Ap2a2,Fas,Ptpn11,Cd81,Acvr1,Nek1,Pkm,Tuba4a,Erf,Dok7,Pip4p1,Arglu1,Slc25a31,Arcn1,Rai1,Abcg1,Ripor1,Arhgap23,Dusp23,Fbxo11,Actn1,Ano10,Ptbp3,Serinc5,Neto2,Ttc12,Tctn1,Casp9,Sik2,Dpyd,Gatad2a,Angel2,Znfx1,Tcf25,Ubac1,Dtnbp1,Sh3bp4,Ppp1r16a,Smc6,Stk24,Chmp3,Gadd45gip1,Lage3,Tomm34,Cmtm6,Tbcb,Naa38,Efhd1,Slc23a2,Pfn2,Morf4l2,Ehmt2	0.018
109	query_1	TRUE	0.00286822	8413	217	118	0.543779	0.0140259	TF:M01986	TF	Factor: c-ets-1; motif: ACCGGAWRYN	21700	462	TF:M00000	TF,TF,TF,TF,TF,TF,TF,TF,TF,TF,TF,TF,TF,TF,TF,TF,TF,TF,TF,TF,TF,TF,TF,TF,TF,TF,TF,TF,TF,TF,TF,TF,TF,TF,TF,TF,TF,TF,TF,TF,TF,TF,TF,TF,TF,TF,TF,TF,TF,TF,TF,TF,TF,TF,TF,TF,TF,TF,TF,TF,TF,TF,TF,TF,TF,TF,TF,TF,TF,TF,TF,TF,TF,TF,TF,TF,TF,TF,TF,TF,TF,TF,TF,TF,TF,TF,TF,TF,TF,TF,TF,TF,TF,TF,TF,TF,TF,TF,TF,TF,TF,TF,TF,TF,TF,TF,TF,TF,TF,TF,TF,TF,TF,TF,TF,TF,TF,TF	Tmem74b,Ccdc6,Pigg,Wdfy1,Nfxl1,Farp1,Ro60,Pld3,Cdk5r2,Nmt2,Dhcr7,Gosr1,Enpp1,Ap2a2,Tpi1,Lsp1,Fas,Kif5c,Prkar2b,Ptpn11,Crkl,Nek1,Tyro3,Golga3,Acyp2,Mrps21,Gmeb2,Timm10,Prkacb,Tuba4a,Adcyap1r1,Sms,Cacna1c,Dlk1,2300009A05Rik,Tmem109,Spout1,Arglu1,Nr1d1,Slc25a31,Samd5,Klhdc2,Myo16,Arcn1,Crhbp,Rai1,Grm4,Isy1,Dusp23,Cyfip1,Gtf2a2,Fam210a,Ano10,Ptbp3,Atcay,Serinc5,Rab3gap2,Mon1b,Neto2,Pgghg,Casp9,Tmt1a,…	0.014
110	query_1	TRUE	0.00327842	11131	217	145	0.668203	0.0130267	TF:M07991_1	TF	Factor: Hes1; motif: NNCACGYGNN; match class: 1	21700	1469	TF:M07991	TF,TF,TF,TF,TF,TF,TF,TF,TF,TF,TF,TF,TF,TF,TF,TF,TF,TF,TF,TF,TF,TF,TF,TF,TF,TF,TF,TF,TF,TF,TF,TF,TF,TF,TF,TF,TF,TF,TF,TF,TF,TF,TF,TF,TF,TF,TF,TF,TF,TF,TF,TF,TF,TF,TF,TF,TF,TF,TF,TF,TF,TF,TF,TF,TF,TF,TF,TF,TF,TF,TF,TF,TF,TF,TF,TF,TF,TF,TF,TF,TF,TF,TF,TF,TF,TF,TF,TF,TF,TF,TF,TF,TF,TF,TF,TF,TF,TF,TF,TF,TF,TF,TF,TF,TF,TF,TF,TF,TF,TF,TF,TF,TF,TF,TF,TF,TF,TF,TF,TF,TF,TF,TF,TF,TF,TF,TF,TF,TF,TF,TF,TF,TF,…	Dhtkd1,Tmem74b,Fbxl16,Exoc6b,Ccdc6,Pigg,Wdfy1,Cacna1i,Nfxl1,Farp1,Ddt,Kpna4,Kpna6,Nmt2,Dhcr7,Got2,Enpp1,Ap2a2,Tpi1,Lsp1,Pcgf2,Fas,Kif5c,Ptpn6,Prkar2b,Ptpn11,Por,Acvr1,Crkl,Impdh1,Nek1,Pkm,Tyro3,Golga3,Gmeb2,Timm10,Prkacb,Tuba4a,Nos3,Hnrnph2,Erf,Sms,Smad5,Cacna1c,Prkcz,Anxa7,Dlk1,2300009A05Rik,Dok7,Pip4p1,2510002D24Rik,Tmem109,Spout1,Prrc1,Nr1d1,Slc25a31,Samd5,Myo16,Lrrk2,Rai1,Grm4,Ripor1,Arhgap23…	0.013
111	query_1	TRUE	0.00402142	7608	217	109	0.502304	0.014327	TF:M07277	TF	Factor: BTEB2; motif: RGGGNGKGGN	21700	342	TF:M00000	TF,TF,TF,TF,TF,TF,TF,TF,TF,TF,TF,TF,TF,TF,TF,TF,TF,TF,TF,TF,TF,TF,TF,TF,TF,TF,TF,TF,TF,TF,TF,TF,TF,TF,TF,TF,TF,TF,TF,TF,TF,TF,TF,TF,TF,TF,TF,TF,TF,TF,TF,TF,TF,TF,TF,TF,TF,TF,TF,TF,TF,TF,TF,TF,TF,TF,TF,TF,TF,TF,TF,TF,TF,TF,TF,TF,TF,TF,TF,TF,TF,TF,TF,TF,TF,TF,TF,TF,TF,TF,TF,TF,TF,TF,TF,TF,TF,TF,TF,TF,TF,TF,TF,TF,TF,TF,TF,TF,TF	Tmem74b,Exoc6b,Ccdc6,Pigg,Pcdh10,Cacna1i,Farp1,Ro60,Gclm,Ddt,Cdk5r2,Nmt2,Dhcr7,Enpp1,Ap2a2,Lsp1,Pcgf2,Fas,Ptpn11,Cd81,Acvr1,Impdh1,Nek1,Pkm,Golga3,Acyp2,Gmeb2,Nos3,Erf,Sms,Cacna1c,Prkcz,Dok7,Pip4p1,Arglu1,Slc25a31,Samd5,Myo16,Lrrk2,Arcn1,Crhbp,Rai1,Abcg1,Ripor1,Arhgap23,Cyp4x1,Dusp23,Mtss2,Ranbp10,Cyfip1,Fbxo11,Actn1,Pdk1,Ano10,Ptbp3,Atcay,Bmp3,Serinc5,Dlgap2,Slc9a7,Rab3gap2,Neto2,Ttc12,Tctn1,Cas…	0.014
112	query_1	TRUE	0.00445109	4257	217	71	0.327189	0.0166784	TF:M00196_1	TF	Factor: Sp1; motif: NGGGGGCGGGGYN; match class: 1	21700	3331	TF:M00196	TF,TF,TF,TF,TF,TF,TF,TF,TF,TF,TF,TF,TF,TF,TF,TF,TF,TF,TF,TF,TF,TF,TF,TF,TF,TF,TF,TF,TF,TF,TF,TF,TF,TF,TF,TF,TF,TF,TF,TF,TF,TF,TF,TF,TF,TF,TF,TF,TF,TF,TF,TF,TF,TF,TF,TF,TF,TF,TF,TF,TF,TF,TF,TF,TF,TF,TF,TF,TF,TF,TF	Tmem74b,Fbxl16,Exoc6b,Ccdc6,Farp1,Ro60,Nmt2,Dhcr7,Enpp1,Ap2a2,Fas,Ptpn11,Cd81,Por,Acvr1,Impdh1,Nek1,Pkm,Tuba4a,Dok7,Pip4p1,Arglu1,Slc25a31,Myo16,Arcn1,Rai1,Abcg1,Ripor1,Arhgap23,Dusp23,Ranbp10,Fbxo11,Actn1,Ano10,Ptbp3,Atcay,Serinc5,Slc9a7,Neto2,Ttc12,Tctn1,Casp9,Sik2,Dpyd,Gatad2a,Cmc2,Angel2,Ablim1,Znfx1,Ubac1,Dtnbp1,Sh3bp4,Ppp1r16a,Smc6,Eps8l2,Stk24,Chmp3,Gadd45gip1,Lage3,Ears2,Tomm34,Cmtm6,Tbcb…	0.017
113	query_1	TRUE	0.00642442	6658	217	98	0.451613	0.0147191	TF:M03893	TF	Factor: WT1; motif: GNGGGGGCGGGG	21700	3852	TF:M00000	TF,TF,TF,TF,TF,TF,TF,TF,TF,TF,TF,TF,TF,TF,TF,TF,TF,TF,TF,TF,TF,TF,TF,TF,TF,TF,TF,TF,TF,TF,TF,TF,TF,TF,TF,TF,TF,TF,TF,TF,TF,TF,TF,TF,TF,TF,TF,TF,TF,TF,TF,TF,TF,TF,TF,TF,TF,TF,TF,TF,TF,TF,TF,TF,TF,TF,TF,TF,TF,TF,TF,TF,TF,TF,TF,TF,TF,TF,TF,TF,TF,TF,TF,TF,TF,TF,TF,TF,TF,TF,TF,TF,TF,TF,TF,TF,TF,TF	Tmem74b,Fbxl16,Ccdc6,Rsbn1l,Pigg,Cacna1i,Farp1,Ntn1,Kpna4,Nmt2,Dhcr7,Enpp1,Ap2a2,Lsp1,Fas,Prkar2b,Ptpn11,Cd81,Por,Acvr1,Impdh1,Nek1,Tuba4a,Adcyap1r1,Cdh10,Erf,Sms,Smad5,Cacna1c,Dlk1,2300009A05Rik,Dok7,Pip4p1,Arglu1,Slc25a31,Lrrk2,Arcn1,Rai1,Abcg1,Grm4,Arhgap23,Dusp23,Ranbp10,Fbxo11,Actn1,Pdk1,Ptbp3,Atcay,Slc9a7,Srp68,Rab3gap2,Mon1b,Neto2,Armc6,Ttc12,Tctn1,Casp9,Sik2,Gatad2a,Angel2,Ablim1,Znfx1,Gl…	0.015
114	query_1	TRUE	0.00693683	11145	217	144	0.663594	0.0129206	TF:M03876	TF	Factor: Kaiso; motif: GCMGGGRGCRGS	21700	1858	TF:M00000	TF,TF,TF,TF,TF,TF,TF,TF,TF,TF,TF,TF,TF,TF,TF,TF,TF,TF,TF,TF,TF,TF,TF,TF,TF,TF,TF,TF,TF,TF,TF,TF,TF,TF,TF,TF,TF,TF,TF,TF,TF,TF,TF,TF,TF,TF,TF,TF,TF,TF,TF,TF,TF,TF,TF,TF,TF,TF,TF,TF,TF,TF,TF,TF,TF,TF,TF,TF,TF,TF,TF,TF,TF,TF,TF,TF,TF,TF,TF,TF,TF,TF,TF,TF,TF,TF,TF,TF,TF,TF,TF,TF,TF,TF,TF,TF,TF,TF,TF,TF,TF,TF,TF,TF,TF,TF,TF,TF,TF,TF,TF,TF,TF,TF,TF,TF,TF,TF,TF,TF,TF,TF,TF,TF,TF,TF,TF,TF,TF,TF,TF,TF,TF,…	Tmem74b,Fbxl16,Ccdc6,Rsbn1l,Pcdh10,Cacna1i,Nfxl1,Farp1,Ro60,Ntn1,Gclm,Kpna4,Pld3,Cdk5r2,Pomc,Enpp1,Cd44,Klk1,Tpi1,Fas,Kif5c,Ptpn6,Prkar2b,Ptpn11,Cd81,Por,Acvr1,Crkl,Impdh1,Nek1,Pkm,Tyro3,Golga3,Acyp2,Mrps21,Opa1,Gmeb2,Timm10,Prkacb,Tuba4a,Adcyap1r1,Nos3,Erf,Sms,Smad5,Cacna1c,Dlk1,2300009A05Rik,Dok7,2510002D24Rik,Tmem109,Spout1,Arglu1,Prrc1,Nr1d1,Samd5,Klhdc2,Myo16,Lrrk2,Arcn1,Crhbp,Rai1,Abcg1,Grm…	0.013
115	query_1	TRUE	0.00863965	8772	217	120	0.552995	0.0136799	TF:M00933	TF	Factor: Sp1; motif: CCCCGCCCCN	21700	3324	TF:M00000	TF,TF,TF,TF,TF,TF,TF,TF,TF,TF,TF,TF,TF,TF,TF,TF,TF,TF,TF,TF,TF,TF,TF,TF,TF,TF,TF,TF,TF,TF,TF,TF,TF,TF,TF,TF,TF,TF,TF,TF,TF,TF,TF,TF,TF,TF,TF,TF,TF,TF,TF,TF,TF,TF,TF,TF,TF,TF,TF,TF,TF,TF,TF,TF,TF,TF,TF,TF,TF,TF,TF,TF,TF,TF,TF,TF,TF,TF,TF,TF,TF,TF,TF,TF,TF,TF,TF,TF,TF,TF,TF,TF,TF,TF,TF,TF,TF,TF,TF,TF,TF,TF,TF,TF,TF,TF,TF,TF,TF,TF,TF,TF,TF,TF,TF,TF,TF,TF,TF,TF	Tmem74b,Fbxl16,Exoc6b,Ccdc6,Rsbn1l,Pigg,Pcdh10,Cacna1i,Farp1,Ro60,Gclm,Ddt,Nmt2,Dhcr7,Enpp1,Cd44,Ap2a2,Tpi1,Lsp1,Pcgf2,Fas,Ptpn11,Cd81,Por,Acvr1,Impdh1,Nek1,Pkm,Golga3,Acyp2,Gmeb2,Prkacb,Tuba4a,Adcyap1r1,Nos3,Hnrnph2,Cdh10,Erf,Sms,Smad5,Cacna1c,Prkcz,Dlk1,2300009A05Rik,Dok7,Pip4p1,Arglu1,Slc25a31,Myo16,Lrrk2,Arcn1,Crhbp,Rai1,Abcg1,Ripor1,Arhgap23,Cyp4x1,Dusp23,Mtss2,Ranbp10,Cyfip1,Fbxo11,Actn1,Pd…	0.014
116	query_1	TRUE	0.00867617	7533	217	107	0.493088	0.0142042	TF:M02036	TF	Factor: WT1; motif: CGCCCCCNCN	21700	3850	TF:M00000	TF,TF,TF,TF,TF,TF,TF,TF,TF,TF,TF,TF,TF,TF,TF,TF,TF,TF,TF,TF,TF,TF,TF,TF,TF,TF,TF,TF,TF,TF,TF,TF,TF,TF,TF,TF,TF,TF,TF,TF,TF,TF,TF,TF,TF,TF,TF,TF,TF,TF,TF,TF,TF,TF,TF,TF,TF,TF,TF,TF,TF,TF,TF,TF,TF,TF,TF,TF,TF,TF,TF,TF,TF,TF,TF,TF,TF,TF,TF,TF,TF,TF,TF,TF,TF,TF,TF,TF,TF,TF,TF,TF,TF,TF,TF,TF,TF,TF,TF,TF,TF,TF,TF,TF,TF,TF,TF	Dhtkd1,Fbxl16,Exoc6b,Ccdc6,Rsbn1l,Cacna1i,Nfxl1,Farp1,Ntn1,Gclm,Pld3,Cdk5r2,Nmt2,Dhcr7,Pomc,Got2,Enpp1,Ap2a2,Lsp1,Fas,Kif5c,Prkar2b,Ptpn11,Acvr1,Impdh1,Nek1,Tyro3,Golga3,Tuba4a,Adcyap1r1,Erf,Sms,Smad5,Cacna1c,Dlk1,2300009A05Rik,Dok7,Pip4p1,Arglu1,Nr1d1,Slc25a31,Klhdc2,Lrrk2,Arcn1,Rai1,Abcg1,Grm4,Arhgap23,Dusp23,Mtss2,Ranbp10,Fbxo11,Actn1,Pdk1,Ptbp3,Atcay,Srp68,Rab3gap2,Mon1b,Armc6,Tctn1,Casp9,Sik…	0.014
117	query_1	TRUE	0.00897135	9962	217	132	0.608295	0.0132504	TF:M01991	TF	Factor: PEA3; motif: RCCGGAAGYN	21700	2734	TF:M00000	TF,TF,TF,TF,TF,TF,TF,TF,TF,TF,TF,TF,TF,TF,TF,TF,TF,TF,TF,TF,TF,TF,TF,TF,TF,TF,TF,TF,TF,TF,TF,TF,TF,TF,TF,TF,TF,TF,TF,TF,TF,TF,TF,TF,TF,TF,TF,TF,TF,TF,TF,TF,TF,TF,TF,TF,TF,TF,TF,TF,TF,TF,TF,TF,TF,TF,TF,TF,TF,TF,TF,TF,TF,TF,TF,TF,TF,TF,TF,TF,TF,TF,TF,TF,TF,TF,TF,TF,TF,TF,TF,TF,TF,TF,TF,TF,TF,TF,TF,TF,TF,TF,TF,TF,TF,TF,TF,TF,TF,TF,TF,TF,TF,TF,TF,TF,TF,TF,TF,TF,TF,TF,TF,TF,TF,TF,TF,TF,TF,TF,TF,TF	Tmem74b,Ccdc6,Rsbn1l,Pigg,Wdfy1,Nfxl1,Farp1,Ro60,Kpna4,Pld3,Cdk5r2,Nmt2,Dhcr7,Gosr1,Enpp1,Cd44,Ap2a2,Lsp1,Pcgf2,Ndn,Fas,Kif5c,Prkar2b,Ptpn11,Acvr1,Crkl,Nek1,Tyro3,Golga3,Acyp2,Mrps21,Opa1,Gmeb2,Timm10,Prkacb,Tuba4a,Adcyap1r1,Cdh10,Sms,Cacna1c,Dlk1,2300009A05Rik,Tmem109,Spout1,Arglu1,Nr1d1,Slc25a31,Samd5,Klhdc2,Arcn1,Crhbp,Rai1,Grm4,Isy1,Dusp23,Cyfip1,Fbxo11,Actn1,Gtf2a2,Fam210a,Ano10,Ptbp3,Atcay,…	0.013
118	query_1	TRUE	0.00915555	5986	217	90	0.414747	0.0150351	TF:M00431	TF	Factor: E2F-1; motif: TTTSGCGS	21700	756	TF:M00000	TF,TF,TF,TF,TF,TF,TF,TF,TF,TF,TF,TF,TF,TF,TF,TF,TF,TF,TF,TF,TF,TF,TF,TF,TF,TF,TF,TF,TF,TF,TF,TF,TF,TF,TF,TF,TF,TF,TF,TF,TF,TF,TF,TF,TF,TF,TF,TF,TF,TF,TF,TF,TF,TF,TF,TF,TF,TF,TF,TF,TF,TF,TF,TF,TF,TF,TF,TF,TF,TF,TF,TF,TF,TF,TF,TF,TF,TF,TF,TF,TF,TF,TF,TF,TF,TF,TF,TF,TF,TF	Fbxl16,Rsbn1l,Pcdh10,Cacna1i,Nfxl1,Farp1,Ntn1,Ddt,Pld3,Nmt2,Enpp1,Cd44,Pcgf2,Kif5c,Prkar2b,Cd81,Opa1,Gmeb2,Prkacb,Adcyap1r1,Hnrnph2,Cdh10,Sms,Cacna1c,Prkcz,2300009A05Rik,Spout1,Arglu1,Prrc1,Slc25a31,Klhdc2,Myo16,Rai1,Ripor1,Cyp4x1,Mtss2,Fbxo11,Actn1,Pdk1,Ptbp3,Serinc5,Slc9a7,Rab3gap2,Neto2,Armc6,Pgghg,Tctn1,Casp9,Sik2,Aqr,Dpyd,Gatad2a,Pphln1,Znfx1,Ubac2,Slco3a1,2310022A10Rik,Rttn,Tmx1,Tapbpl,Ubac…	0.015
119	query_1	TRUE	0.00983981	6994	217	101	0.465438	0.0144409	TF:M10211	TF	Factor: E2F-4; motif: NGGGGGCGGGRMNN	21700	774	TF:M00000	TF,TF,TF,TF,TF,TF,TF,TF,TF,TF,TF,TF,TF,TF,TF,TF,TF,TF,TF,TF,TF,TF,TF,TF,TF,TF,TF,TF,TF,TF,TF,TF,TF,TF,TF,TF,TF,TF,TF,TF,TF,TF,TF,TF,TF,TF,TF,TF,TF,TF,TF,TF,TF,TF,TF,TF,TF,TF,TF,TF,TF,TF,TF,TF,TF,TF,TF,TF,TF,TF,TF,TF,TF,TF,TF,TF,TF,TF,TF,TF,TF,TF,TF,TF,TF,TF,TF,TF,TF,TF,TF,TF,TF,TF,TF,TF,TF,TF,TF,TF,TF	Dhtkd1,Tmem74b,Fbxl16,Ccdc6,Pigg,Cacna1i,Ro60,Ddt,Pld3,Nmt2,Dhcr7,Ap2a2,Tpi1,Lsp1,Pcgf2,Fas,Prkar2b,Cd81,Por,Impdh1,Nek1,Pkm,Golga3,Timm10,Prkacb,Tuba4a,Adcyap1r1,Erf,Sms,Cacna1c,2300009A05Rik,Dok7,Pip4p1,Arglu1,Slc25a31,Klhdc2,Myo16,Lrrk2,Arcn1,Crhbp,Rai1,Abcg1,Arhgap23,Cyp4x1,Dusp23,Myh14,Ranbp10,Fbxo11,Actn1,Pdk1,Ano10,Ptbp3,Atcay,Serinc5,Rab3gap2,Mon1b,Ttc12,Tctn1,Casp9,Tsku,Sik2,Dpyd,Gatad2a…	0.014
120	query_1	TRUE	0.0112496	7106	217	102	0.470046	0.0143541	TF:M03807	TF	Factor: SP2; motif: GNNGGGGGCGGGGSN	21700	3338	TF:M00000	TF,TF,TF,TF,TF,TF,TF,TF,TF,TF,TF,TF,TF,TF,TF,TF,TF,TF,TF,TF,TF,TF,TF,TF,TF,TF,TF,TF,TF,TF,TF,TF,TF,TF,TF,TF,TF,TF,TF,TF,TF,TF,TF,TF,TF,TF,TF,TF,TF,TF,TF,TF,TF,TF,TF,TF,TF,TF,TF,TF,TF,TF,TF,TF,TF,TF,TF,TF,TF,TF,TF,TF,TF,TF,TF,TF,TF,TF,TF,TF,TF,TF,TF,TF,TF,TF,TF,TF,TF,TF,TF,TF,TF,TF,TF,TF,TF,TF,TF,TF,TF,TF	Tmem74b,Fbxl16,Exoc6b,Ccdc6,Rsbn1l,Pigg,Pcdh10,Cacna1i,Farp1,Ro60,Gclm,Ddt,Nmt2,Dhcr7,Enpp1,Ap2a2,Lsp1,Pcgf2,Fas,Prkar2b,Ptpn11,Cd81,Por,Acvr1,Impdh1,Nek1,Pkm,Golga3,Acyp2,Tuba4a,Adcyap1r1,Nos3,Erf,Sms,Cacna1c,Prkcz,Dlk1,Dok7,Pip4p1,Arglu1,Slc25a31,Myo16,Lrrk2,Arcn1,Crhbp,Rai1,Abcg1,Ripor1,Arhgap23,Dusp23,Mtss2,Ranbp10,Fbxo11,Actn1,Pdk1,Ano10,Ptbp3,Atcay,Serinc5,Rab3gap2,Neto2,Ttc12,Tctn1,Casp9,S…	0.014
121	query_1	TRUE	0.0115185	8143	217	113	0.520737	0.013877	TF:M01783	TF	Factor: SP2; motif: GGGCGGGAC	21700	3334	TF:M00000	TF,TF,TF,TF,TF,TF,TF,TF,TF,TF,TF,TF,TF,TF,TF,TF,TF,TF,TF,TF,TF,TF,TF,TF,TF,TF,TF,TF,TF,TF,TF,TF,TF,TF,TF,TF,TF,TF,TF,TF,TF,TF,TF,TF,TF,TF,TF,TF,TF,TF,TF,TF,TF,TF,TF,TF,TF,TF,TF,TF,TF,TF,TF,TF,TF,TF,TF,TF,TF,TF,TF,TF,TF,TF,TF,TF,TF,TF,TF,TF,TF,TF,TF,TF,TF,TF,TF,TF,TF,TF,TF,TF,TF,TF,TF,TF,TF,TF,TF,TF,TF,TF,TF,TF,TF,TF,TF,TF,TF,TF,TF,TF,TF	Tmem74b,Exoc6b,Pcdh10,Nfxl1,Farp1,Ro60,Ntn1,Gclm,Kpna4,Pld3,Nmt2,Dhcr7,Enpp1,Tpi1,Pcgf2,Prkar2b,Ptpn11,Cd81,Por,Acvr1,Impdh1,Nek1,Pkm,Golga3,Opa1,Timm10,Prkacb,Tuba4a,Nos3,Erf,Sms,Prkcz,Anxa7,Dlk1,2300009A05Rik,Dok7,Pip4p1,Arglu1,Slc25a31,Arcn1,Rai1,Abcg1,Ripor1,Arhgap23,Dusp23,Mtss2,Myh14,Fbxo11,Actn1,Ano10,Ptbp3,Atcay,Serinc5,Slc9a7,Mon1b,Neto2,Pgghg,Ttc12,Tctn1,Casp9,Sik2,Dpyd,Gatad2a,Cmc2,Ang…	0.014
122	query_1	TRUE	0.0126476	14512	217	174	0.801843	0.0119901	TF:M10219	TF	Factor: Elk-1; motif: NCCGGAAGTGN	21700	932	TF:M00000	TF,TF,TF,TF,TF,TF,TF,TF,TF,TF,TF,TF,TF,TF,TF,TF,TF,TF,TF,TF,TF,TF,TF,TF,TF,TF,TF,TF,TF,TF,TF,TF,TF,TF,TF,TF,TF,TF,TF,TF,TF,TF,TF,TF,TF,TF,TF,TF,TF,TF,TF,TF,TF,TF,TF,TF,TF,TF,TF,TF,TF,TF,TF,TF,TF,TF,TF,TF,TF,TF,TF,TF,TF,TF,TF,TF,TF,TF,TF,TF,TF,TF,TF,TF,TF,TF,TF,TF,TF,TF,TF,TF,TF,TF,TF,TF,TF,TF,TF,TF,TF,TF,TF,TF,TF,TF,TF,TF,TF,TF,TF,TF,TF,TF,TF,TF,TF,TF,TF,TF,TF,TF,TF,TF,TF,TF,TF,TF,TF,TF,TF,TF,TF,…	Gm5938,Fbxl16,Exoc6b,Ccdc6,Rsbn1l,Pigg,Wdfy1,Nfxl1,Farp1,Ro60,Ntn1,Gclm,Ddt,Kpna4,Kpna6,Pld3,Cdk5r2,Nmt2,Dhcr7,Gosr1,Pomc,Mb,Enpp1,Cd44,Ap2a2,Tpi1,Lsp1,Pcgf2,Ndn,Fas,Kif5c,Ptpn6,Prkar2b,Ptpn11,Cd81,Por,Acvr1,Pkm,Tyro3,Golga3,Acyp2,Mrps21,Opa1,Gmeb2,Timm10,Prkacb,Tuba4a,Adcyap1r1,Nos3,Hnrnph2,Cdh10,Erf,Sms,Smad5,Cacna1c,Prkcz,Dlk1,2300009A05Rik,Dok7,Pip4p1,Tmem109,Spout1,Arglu1,Nr1d1,Gpr149,Slc25a…	0.012
123	query_1	TRUE	0.0139109	5424	217	83	0.382488	0.0153024	TF:M01598	TF	Factor: ZBED6; motif: NRRGCTCGCCNN	21700	3884	TF:M00000	TF,TF,TF,TF,TF,TF,TF,TF,TF,TF,TF,TF,TF,TF,TF,TF,TF,TF,TF,TF,TF,TF,TF,TF,TF,TF,TF,TF,TF,TF,TF,TF,TF,TF,TF,TF,TF,TF,TF,TF,TF,TF,TF,TF,TF,TF,TF,TF,TF,TF,TF,TF,TF,TF,TF,TF,TF,TF,TF,TF,TF,TF,TF,TF,TF,TF,TF,TF,TF,TF,TF,TF,TF,TF,TF,TF,TF,TF,TF,TF,TF,TF,TF	Tmem74b,Exoc6b,Nfxl1,Ro60,Ntn1,Kpna6,Cdk5r2,Dhcr7,Gosr1,Enpp1,Ptpn11,Por,Acvr1,Crkl,Impdh1,Gmeb2,Prkacb,Sms,Smad5,Cacna1c,Anxa7,Dok7,Tmem109,Prrc1,Klhdc2,Lrrk2,Grm4,Ripor1,Arhgap23,Isy1,Dusp23,Myh14,Ranbp10,Cyfip1,Fbxo11,Actn1,Bmp3,Slc9a7,Rab3gap2,Neto2,Armc6,Ttc12,Tctn1,Casp9,Tmt1a,Tsku,Sik2,Gatad2a,Pphln1,Znfx1,Ubac2,Gle1,Tcf25,Slco3a1,Tmx1,Chchd6,Cbr4,Dtnbp1,Srgap2,Sh3bp4,Neurl1a,Smc6,Atad3a,R…	0.015
124	query_1	TRUE	0.0144731	10749	217	139	0.640553	0.0129314	TF:M01660	TF	Factor: GABP-alpha; motif: CTTCCK	21700	1258	TF:M00000	TF,TF,TF,TF,TF,TF,TF,TF,TF,TF,TF,TF,TF,TF,TF,TF,TF,TF,TF,TF,TF,TF,TF,TF,TF,TF,TF,TF,TF,TF,TF,TF,TF,TF,TF,TF,TF,TF,TF,TF,TF,TF,TF,TF,TF,TF,TF,TF,TF,TF,TF,TF,TF,TF,TF,TF,TF,TF,TF,TF,TF,TF,TF,TF,TF,TF,TF,TF,TF,TF,TF,TF,TF,TF,TF,TF,TF,TF,TF,TF,TF,TF,TF,TF,TF,TF,TF,TF,TF,TF,TF,TF,TF,TF,TF,TF,TF,TF,TF,TF,TF,TF,TF,TF,TF,TF,TF,TF,TF,TF,TF,TF,TF,TF,TF,TF,TF,TF,TF,TF,TF,TF,TF,TF,TF,TF,TF,TF,TF,TF,TF,TF,TF,…	Fbxl16,Ccdc6,Rsbn1l,Pigg,Wdfy1,Nfxl1,Farp1,Ro60,Ntn1,Gclm,Ddt,Kpna4,Kpna6,Pld3,Cdk5r2,Nmt2,Dhcr7,Gosr1,Pomc,Enpp1,Cd44,Lsp1,Pcgf2,Ndn,Fas,Klkb1,Kif5c,Prkar2b,Ptpn11,Cd81,Por,Acvr1,Pkm,Tyro3,Golga3,Acyp2,Mrps21,Opa1,Gmeb2,Timm10,Prkacb,Adcyap1r1,Cdh10,Sms,Prkcz,Anxa7,Dlk1,Pip4p1,Tmem109,Spout1,Arglu1,Slc25a31,Samd5,Klhdc2,Arcn1,Rai1,Grm4,Ripor1,Isy1,Cyp4x1,Dusp23,Ranbp10,Cyfip1,Fbxo11,Actn1,Gtf2a2…	0.013
125	query_1	TRUE	0.0147783	7054	217	101	0.465438	0.0143181	TF:M00803_1	TF	Factor: E2F; motif: GGCGSG; match class: 1	21700	791	TF:M00803	TF,TF,TF,TF,TF,TF,TF,TF,TF,TF,TF,TF,TF,TF,TF,TF,TF,TF,TF,TF,TF,TF,TF,TF,TF,TF,TF,TF,TF,TF,TF,TF,TF,TF,TF,TF,TF,TF,TF,TF,TF,TF,TF,TF,TF,TF,TF,TF,TF,TF,TF,TF,TF,TF,TF,TF,TF,TF,TF,TF,TF,TF,TF,TF,TF,TF,TF,TF,TF,TF,TF,TF,TF,TF,TF,TF,TF,TF,TF,TF,TF,TF,TF,TF,TF,TF,TF,TF,TF,TF,TF,TF,TF,TF,TF,TF,TF,TF,TF,TF,TF	Tmem74b,Fbxl16,Ccdc6,Rsbn1l,Wdfy1,Cacna1i,Farp1,Gclm,Ddt,Kpna4,Cdk5r2,Nmt2,Got2,Enpp1,Ap2a2,Pcgf2,Prkar2b,Ptpn11,Cd81,Acvr1,Pkm,Gmeb2,Prkacb,Adcyap1r1,Erf,Sms,Smad5,Cacna1c,Dlk1,2300009A05Rik,Dok7,Pip4p1,2510002D24Rik,Arglu1,Prrc1,Slc25a31,Samd5,Klhdc2,Myo16,Lrrk2,Arcn1,Crhbp,Rai1,Grm4,Ripor1,Mtss2,Myh14,Fbxo11,Actn1,Fam210a,Ptbp3,Bmp3,Slc9a7,Neto2,Sik2,Gatad2a,Cmc2,Angel2,Pphln1,Znfx1,Tcf25,Rttn…	0.014
126	query_1	TRUE	0.016586	3107	217	55	0.253456	0.017702	TF:M07277_1	TF	Factor: BTEB2; motif: RGGGNGKGGN; match class: 1	21700	343	TF:M07277	TF,TF,TF,TF,TF,TF,TF,TF,TF,TF,TF,TF,TF,TF,TF,TF,TF,TF,TF,TF,TF,TF,TF,TF,TF,TF,TF,TF,TF,TF,TF,TF,TF,TF,TF,TF,TF,TF,TF,TF,TF,TF,TF,TF,TF,TF,TF,TF,TF,TF,TF,TF,TF,TF,TF	Tmem74b,Pcdh10,Farp1,Ro60,Ddt,Dhcr7,Enpp1,Ap2a2,Pcgf2,Fas,Acvr1,Impdh1,Nek1,Pkm,Erf,Cacna1c,Dok7,Pip4p1,Slc25a31,Myo16,Crhbp,Rai1,Abcg1,Ripor1,Dusp23,Mtss2,Ranbp10,Fbxo11,Actn1,Ano10,Ptbp3,Serinc5,Slc9a7,Tctn1,Casp9,Sik2,Dpyd,Gatad2a,Angel2,Ubac1,St3gal6,Dtnbp1,Sh3bp4,Ppp1r16a,Smc6,Gadd45gip1,Lage3,Chodl,Tomm34,Cmtm6,Slc23a2,Pfn2,Pnck,Morf4l2,Ehmt2	0.018
127	query_1	TRUE	0.0206041	4697	217	74	0.341014	0.0157547	TF:M01660_1	TF	Factor: GABP-alpha; motif: CTTCCK; match class: 1	21700	1259	TF:M01660	TF,TF,TF,TF,TF,TF,TF,TF,TF,TF,TF,TF,TF,TF,TF,TF,TF,TF,TF,TF,TF,TF,TF,TF,TF,TF,TF,TF,TF,TF,TF,TF,TF,TF,TF,TF,TF,TF,TF,TF,TF,TF,TF,TF,TF,TF,TF,TF,TF,TF,TF,TF,TF,TF,TF,TF,TF,TF,TF,TF,TF,TF,TF,TF,TF,TF,TF,TF,TF,TF,TF,TF,TF,TF	Rsbn1l,Farp1,Ddt,Kpna4,Pld3,Nmt2,Dhcr7,Pomc,Enpp1,Cd44,Lsp1,Pkm,Tyro3,Golga3,Mrps21,Gmeb2,Timm10,Prkacb,Sms,Prkcz,Arglu1,Klhdc2,Arcn1,Grm4,Isy1,Cyp4x1,Dusp23,Gtf2a2,Fam210a,Ano10,Bmp3,Mon1b,Tctn1,Tsku,Sik2,Aqr,Cmc2,Pphln1,Znfx1,Ubac2,Zc3h10,Gle1,2310022A10Rik,Rttn,Ubac1,Bloc1s4,Brk1,Dtnbp1,Prpf3,Ppp1r16a,Smc6,Plpp3,Stk24,Rnps1,Zdhhc6,Chmp3,Rpa3,Ears2,Tomm34,Wars2,Zcrb1,Tbcb,Borcs8,Appbp2,Crot,Slc…	0.016
128	query_1	TRUE	0.0221202	10412	217	135	0.62212	0.0129658	TF:M01993	TF	Factor: TEL1; motif: CNCGGAANNN	21700	3718	TF:M00000	TF,TF,TF,TF,TF,TF,TF,TF,TF,TF,TF,TF,TF,TF,TF,TF,TF,TF,TF,TF,TF,TF,TF,TF,TF,TF,TF,TF,TF,TF,TF,TF,TF,TF,TF,TF,TF,TF,TF,TF,TF,TF,TF,TF,TF,TF,TF,TF,TF,TF,TF,TF,TF,TF,TF,TF,TF,TF,TF,TF,TF,TF,TF,TF,TF,TF,TF,TF,TF,TF,TF,TF,TF,TF,TF,TF,TF,TF,TF,TF,TF,TF,TF,TF,TF,TF,TF,TF,TF,TF,TF,TF,TF,TF,TF,TF,TF,TF,TF,TF,TF,TF,TF,TF,TF,TF,TF,TF,TF,TF,TF,TF,TF,TF,TF,TF,TF,TF,TF,TF,TF,TF,TF,TF,TF,TF,TF,TF,TF,TF,TF,TF,TF,…	Tmem74b,Fbxl16,Ccdc6,Rsbn1l,Pigg,Pcdh10,Wdfy1,Cacna1i,Nfxl1,Ro60,Ntn1,Ddt,Kpna4,Pld3,Cdk5r2,Nmt2,Dhcr7,Gosr1,Pomc,Enpp1,Lsp1,Pcgf2,Ndn,Fas,Klkb1,Prkar2b,Por,Acvr1,Crkl,Impdh1,Nek1,Pkm,Tyro3,Golga3,Acyp2,Mrps21,Gmeb2,Timm10,Prkacb,Adcyap1r1,Hnrnph2,Sms,Prkcz,Dlk1,2300009A05Rik,Pip4p1,Spout1,Arglu1,Prrc1,Samd5,Klhdc2,Myo16,Arcn1,Crhbp,Rai1,Grm4,Ripor1,Isy1,Cyp4x1,Dusp23,Cyfip1,Actn1,Gtf2a2,Pdk1,Fam…	0.013
129	query_1	TRUE	0.029846	4152	217	67	0.308756	0.0161368	TF:M07250_1	TF	Factor: E2F-1; motif: NNNSSCGCSAANN; match class: 1	21700	753	TF:M07250	TF,TF,TF,TF,TF,TF,TF,TF,TF,TF,TF,TF,TF,TF,TF,TF,TF,TF,TF,TF,TF,TF,TF,TF,TF,TF,TF,TF,TF,TF,TF,TF,TF,TF,TF,TF,TF,TF,TF,TF,TF,TF,TF,TF,TF,TF,TF,TF,TF,TF,TF,TF,TF,TF,TF,TF,TF,TF,TF,TF,TF,TF,TF,TF,TF,TF,TF	Fbxl16,Ccdc6,Rsbn1l,Cacna1i,Nfxl1,Gclm,Kpna6,Pld3,Nmt2,Ap2a2,Pcgf2,Kif5c,Prkar2b,Cd81,Gmeb2,Prkacb,Hnrnph2,Erf,Cacna1c,Arglu1,Klhdc2,Rai1,Grm4,Ripor1,Mtss2,Fbxo11,Actn1,Ptbp3,Serinc5,Slc9a7,Neto2,Armc6,Pgghg,Casp9,Pphln1,Znfx1,Ubac2,2310022A10Rik,Rttn,St3gal6,Dtnbp1,Srgap2,Sh3bp4,Gmppa,Neurl1a,Smc6,Atad3a,Stk24,Rnps1,Zdhhc6,Rpa3,Ears2,Tomm34,Zcrb1,Atp5f1d,Dennd6b,Appbp2,Crot,Slc23a2,Map3k20,Stk4,…	0.016
130	query_1	TRUE	0.0312531	2550	217	47	0.21659	0.0184314	TF:M03893_1	TF	Factor: WT1; motif: GNGGGGGCGGGG; match class: 1	21700	3853	TF:M03893	TF,TF,TF,TF,TF,TF,TF,TF,TF,TF,TF,TF,TF,TF,TF,TF,TF,TF,TF,TF,TF,TF,TF,TF,TF,TF,TF,TF,TF,TF,TF,TF,TF,TF,TF,TF,TF,TF,TF,TF,TF,TF,TF,TF,TF,TF,TF	Ccdc6,Rsbn1l,Cacna1i,Ntn1,Nmt2,Ap2a2,Fas,Prkar2b,Ptpn11,Acvr1,Nek1,Erf,Sms,Dok7,Arglu1,Slc25a31,Rai1,Abcg1,Arhgap23,Dusp23,Ranbp10,Fbxo11,Pdk1,Ptbp3,Atcay,Slc9a7,Ttc12,Sik2,Gatad2a,Tcf25,Sh3bp4,Neurl1a,Smc6,Rnps1,Fmc1,Ears2,Tomm34,Cmtm6,Tbcb,Efhd1,Slc23a2,Pfn2,Pnck,Plod1,Morf4l2,Ehmt2,Bnip3l	0.018
131	query_1	TRUE	0.0316922	6163	217	90	0.414747	0.0146033	TF:M02039	TF	Factor: GABPalpha; motif: ACCGGAARYN	21700	1254	TF:M00000	TF,TF,TF,TF,TF,TF,TF,TF,TF,TF,TF,TF,TF,TF,TF,TF,TF,TF,TF,TF,TF,TF,TF,TF,TF,TF,TF,TF,TF,TF,TF,TF,TF,TF,TF,TF,TF,TF,TF,TF,TF,TF,TF,TF,TF,TF,TF,TF,TF,TF,TF,TF,TF,TF,TF,TF,TF,TF,TF,TF,TF,TF,TF,TF,TF,TF,TF,TF,TF,TF,TF,TF,TF,TF,TF,TF,TF,TF,TF,TF,TF,TF,TF,TF,TF,TF,TF,TF,TF,TF	Tmem74b,Pigg,Wdfy1,Farp1,Pld3,Cdk5r2,Dhcr7,Enpp1,Cd44,Ap2a2,Lsp1,Prkar2b,Ptpn11,Nek1,Golga3,Acyp2,Mrps21,Gmeb2,Timm10,Prkacb,Tuba4a,Adcyap1r1,Cdh10,Sms,Dlk1,2300009A05Rik,Tmem109,Arglu1,Slc25a31,Samd5,Klhdc2,Arcn1,Crhbp,Rai1,Grm4,Isy1,Dusp23,Cyfip1,Gtf2a2,Fam210a,Ano10,Ptbp3,Rab3gap2,Mon1b,Neto2,Casp9,Tmt1a,Sik2,Aqr,Gatad2a,Pphln1,Znfx1,Ubac2,Zc3h10,Gle1,2310022A10Rik,Rttn,Tmx1,Gtf2h3,Ubac1,Psmd2…	0.015
132	query_1	TRUE	0.0340931	4085	217	66	0.304147	0.0161567	TF:M00025_1	TF	Factor: Elk-1; motif: NNNNCCGGAARTNN; match class: 1	21700	925	TF:M00025	TF,TF,TF,TF,TF,TF,TF,TF,TF,TF,TF,TF,TF,TF,TF,TF,TF,TF,TF,TF,TF,TF,TF,TF,TF,TF,TF,TF,TF,TF,TF,TF,TF,TF,TF,TF,TF,TF,TF,TF,TF,TF,TF,TF,TF,TF,TF,TF,TF,TF,TF,TF,TF,TF,TF,TF,TF,TF,TF,TF,TF,TF,TF,TF,TF,TF	Wdfy1,Farp1,Ro60,Pld3,Dhcr7,Enpp1,Cd44,Ap2a2,Kif5c,Prkar2b,Tyro3,Golga3,Mrps21,Timm10,Prkacb,Sms,Tmem109,Spout1,Klhdc2,Arcn1,Rai1,Grm4,Isy1,Dusp23,Gtf2a2,Fam210a,Ano10,Ptbp3,Serinc5,Mon1b,Sik2,Aqr,Gatad2a,Znfx1,Ubac2,Zc3h10,2310022A10Rik,Rttn,Ubac1,Bloc1s4,Chchd6,Brk1,Prpf3,Ppp1r16a,Smc6,Rnps1,Zdhhc6,Chmp3,Rpa3,Ears2,Tomm34,Wars2,Cmtm6,Tbcb,Naa38,Mrpl19,Borcs8,Crot,Moap1,Stk4,Nqo2,Selenok,Ulk2,Cc…	0.016
133	query_1	TRUE	0.0365493	9200	217	122	0.562212	0.0132609	TF:M07261	TF	Factor: LKLF; motif: GGGGTGGKSN	21700	1964	TF:M00000	TF,TF,TF,TF,TF,TF,TF,TF,TF,TF,TF,TF,TF,TF,TF,TF,TF,TF,TF,TF,TF,TF,TF,TF,TF,TF,TF,TF,TF,TF,TF,TF,TF,TF,TF,TF,TF,TF,TF,TF,TF,TF,TF,TF,TF,TF,TF,TF,TF,TF,TF,TF,TF,TF,TF,TF,TF,TF,TF,TF,TF,TF,TF,TF,TF,TF,TF,TF,TF,TF,TF,TF,TF,TF,TF,TF,TF,TF,TF,TF,TF,TF,TF,TF,TF,TF,TF,TF,TF,TF,TF,TF,TF,TF,TF,TF,TF,TF,TF,TF,TF,TF,TF,TF,TF,TF,TF,TF,TF,TF,TF,TF,TF,TF,TF,TF,TF,TF,TF,TF,TF,TF	Tmem74b,Fbxl16,Ccdc6,Rsbn1l,Pigg,Wdfy1,Cacna1i,Farp1,Ro60,Ntn1,Pld3,Cdk5r2,Nmt2,Dhcr7,Gosr1,Mb,Got2,Klk1,Klk1b22,Tpi1,Pcgf2,Fas,Kif5c,Ptpn6,Prkar2b,Cd81,Por,Acvr1,Impdh1,Pkm,Acyp2,Gmeb2,Tuba4a,Adcyap1r1,Nos3,Cdh10,Erf,Smad5,Cacna1c,Dlk1,2300009A05Rik,Dok7,2510002D24Rik,Tmem109,Prrc1,Nr1d1,Gpr149,Samd5,Lrrk2,Crhbp,Rai1,Grm4,Ripor1,Dusp23,Ranbp10,Fbxo11,Actn1,Fam210a,Ano10,Ptbp3,Atcay,Bmp3,Dlgap2,S…	0.013
134	query_1	TRUE	0.0381101	9109	217	121	0.557604	0.0132836	TF:M10220	TF	Factor: SAP-1a; motif: NRRCCGGAAGYRN	21700	3078	TF:M00000	TF,TF,TF,TF,TF,TF,TF,TF,TF,TF,TF,TF,TF,TF,TF,TF,TF,TF,TF,TF,TF,TF,TF,TF,TF,TF,TF,TF,TF,TF,TF,TF,TF,TF,TF,TF,TF,TF,TF,TF,TF,TF,TF,TF,TF,TF,TF,TF,TF,TF,TF,TF,TF,TF,TF,TF,TF,TF,TF,TF,TF,TF,TF,TF,TF,TF,TF,TF,TF,TF,TF,TF,TF,TF,TF,TF,TF,TF,TF,TF,TF,TF,TF,TF,TF,TF,TF,TF,TF,TF,TF,TF,TF,TF,TF,TF,TF,TF,TF,TF,TF,TF,TF,TF,TF,TF,TF,TF,TF,TF,TF,TF,TF,TF,TF,TF,TF,TF,TF,TF,TF	Gm5938,Fbxl16,Ccdc6,Rsbn1l,Pigg,Wdfy1,Cacna1i,Nfxl1,Farp1,Ro60,Ntn1,Gclm,Ddt,Kpna4,Pld3,Cdk5r2,Nmt2,Dhcr7,Gosr1,Pomc,Enpp1,Pcgf2,Fas,Ptpn6,Ptpn11,Cd81,Acvr1,Impdh1,Tyro3,Golga3,Acyp2,Mrps21,Gmeb2,Timm10,Prkacb,Adcyap1r1,Cdh10,Erf,Sms,Prkcz,Dlk1,Pip4p1,Tmem109,Spout1,Arglu1,Slc25a31,Samd5,Klhdc2,Grm4,Ripor1,Isy1,Dusp23,Myh14,Ranbp10,Cyfip1,Fbxo11,Actn1,Gtf2a2,Fam210a,Ano10,Ptbp3,Atcay,Bmp3,Serinc5…	0.013
135	query_1	TRUE	0.0386727	2961	217	52	0.239631	0.0175616	TF:M03807_1	TF	Factor: SP2; motif: GNNGGGGGCGGGGSN; match class: 1	21700	3339	TF:M03807	TF,TF,TF,TF,TF,TF,TF,TF,TF,TF,TF,TF,TF,TF,TF,TF,TF,TF,TF,TF,TF,TF,TF,TF,TF,TF,TF,TF,TF,TF,TF,TF,TF,TF,TF,TF,TF,TF,TF,TF,TF,TF,TF,TF,TF,TF,TF,TF,TF,TF,TF,TF	Tmem74b,Fbxl16,Cacna1i,Farp1,Ro60,Nmt2,Dhcr7,Enpp1,Ap2a2,Fas,Ptpn11,Cd81,Por,Acvr1,Impdh1,Nek1,Dok7,Pip4p1,Slc25a31,Myo16,Rai1,Abcg1,Ripor1,Dusp23,Fbxo11,Actn1,Ano10,Ptbp3,Serinc5,Neto2,Tctn1,Casp9,Sik2,Dpyd,Gatad2a,Cmc2,Ubac1,Dtnbp1,Sh3bp4,Ppp1r16a,Smc6,Stk24,Gadd45gip1,Lage3,Tomm34,Cmtm6,Tbcb,Efhd1,Pfn2,Morf4l2,Ehmt2,Bnip3l	0.018
136	query_1	TRUE	0.0390654	2805	217	50	0.230415	0.0178253	TF:M05494_1	TF	Factor: Egr-2; motif: GCGTGGGCGG; match class: 1	21700	859	TF:M05494	TF,TF,TF,TF,TF,TF,TF,TF,TF,TF,TF,TF,TF,TF,TF,TF,TF,TF,TF,TF,TF,TF,TF,TF,TF,TF,TF,TF,TF,TF,TF,TF,TF,TF,TF,TF,TF,TF,TF,TF,TF,TF,TF,TF,TF,TF,TF,TF,TF,TF	Tmem74b,Ccdc6,Cacna1i,Gclm,Cdk5r2,Nmt2,Got2,Enpp1,Pcgf2,Prkar2b,Ptpn11,Por,Acvr1,Gmeb2,Erf,Sms,Dlk1,Dok7,Abcg1,Dusp23,Ranbp10,Fbxo11,Actn1,Ano10,Ptbp3,Tsku,Sik2,Gatad2a,Angel2,Znfx1,Zc3h10,Tcf25,Srgap2,Sh3bp4,Ppp1r16a,Neurl1a,Smc6,Stk24,Chmp3,Ears2,Slc23a2,Nrip3,Pfn2,Ulk2,Pnck,Plod1,Morf4l2,Smarcb1,Ehmt2,Bnip3l	0.018
137	query_1	TRUE	0.0401442	7960	217	109	0.502304	0.0136935	TF:M02023	TF	Factor: MAZ; motif: NKGGGAGGGGRGGR	21700	2076	TF:M00000	TF,TF,TF,TF,TF,TF,TF,TF,TF,TF,TF,TF,TF,TF,TF,TF,TF,TF,TF,TF,TF,TF,TF,TF,TF,TF,TF,TF,TF,TF,TF,TF,TF,TF,TF,TF,TF,TF,TF,TF,TF,TF,TF,TF,TF,TF,TF,TF,TF,TF,TF,TF,TF,TF,TF,TF,TF,TF,TF,TF,TF,TF,TF,TF,TF,TF,TF,TF,TF,TF,TF,TF,TF,TF,TF,TF,TF,TF,TF,TF,TF,TF,TF,TF,TF,TF,TF,TF,TF,TF,TF,TF,TF,TF,TF,TF,TF,TF,TF,TF,TF,TF,TF,TF,TF,TF,TF,TF,TF	Dhtkd1,Tmem74b,Fbxl16,Ccdc6,Rsbn1l,Cacna1i,Farp1,Ro60,Ddt,Kpna4,Pld3,Nmt2,Mb,Enpp1,Cd44,Klk1,Ap2a2,Tpi1,Pcgf2,Fas,Ptpn6,Cd81,Por,Acvr1,Nek1,Pkm,Golga3,Acyp2,Gmeb2,Timm10,Prkacb,Tuba4a,Hnrnph2,Cdh10,Erf,Smad5,Cacna1c,Prkcz,Dlk1,2510002D24Rik,Tmem109,Prrc1,Gpr149,Samd5,Klhdc2,Lrrk2,Crhbp,Rai1,Abcg1,Grm4,Ripor1,Arhgap23,Dusp23,Ranbp10,Fbxo11,Actn1,Atcay,Dlgap2,Slc9a7,Rab3gap2,Neto2,Pgghg,Gbp9,Ttc12,…	0.014
138	query_1	TRUE	0.0403348	19841	217	213	0.981567	0.0107353	TF:M01822_1	TF	Factor: CPBP; motif: SNCCCNN; match class: 1	21700	553	TF:M01822	TF,TF,TF,TF,TF,TF,TF,TF,TF,TF,TF,TF,TF,TF,TF,TF,TF,TF,TF,TF,TF,TF,TF,TF,TF,TF,TF,TF,TF,TF,TF,TF,TF,TF,TF,TF,TF,TF,TF,TF,TF,TF,TF,TF,TF,TF,TF,TF,TF,TF,TF,TF,TF,TF,TF,TF,TF,TF,TF,TF,TF,TF,TF,TF,TF,TF,TF,TF,TF,TF,TF,TF,TF,TF,TF,TF,TF,TF,TF,TF,TF,TF,TF,TF,TF,TF,TF,TF,TF,TF,TF,TF,TF,TF,TF,TF,TF,TF,TF,TF,TF,TF,TF,TF,TF,TF,TF,TF,TF,TF,TF,TF,TF,TF,TF,TF,TF,TF,TF,TF,TF,TF,TF,TF,TF,TF,TF,TF,TF,TF,TF,TF,TF,…	Dhtkd1,Tmem74b,Fbxl16,Exoc6b,Ccdc6,Rsbn1l,Pigg,Pcdh10,Wdfy1,Cacna1i,Nfxl1,Farp1,Ro60,Ntn1,Gclm,Ddt,Kpna4,Kpna6,Pld3,Cdk5r2,Nmt2,Dhcr7,Gosr1,Pomc,Mb,Got2,Enpp1,Cd44,Klk1,Klk1b22,Ap2a2,Tpi1,Lsp1,Pcgf2,Fas,Klkb1,Kif5c,Ptpn6,Prkar2b,Ptpn11,Cd81,Por,Acvr1,Crkl,Impdh1,Nek1,Pkm,Tyro3,Golga3,Acyp2,Mrps21,Opa1,Gmeb2,Timm10,Prkacb,Tuba4a,Adcyap1r1,Nos3,Hnrnph2,Cdh10,Erf,Sms,Smad5,Cacna1c,Prkcz,Anxa7,Dlk1,2…	0.011
139	query_1	TRUE	0.0411651	4277	217	68	0.313364	0.015899	TF:M01973	TF	Factor: PLAG1; motif: CCCCCKWNNNGGSCCC	21700	2786	TF:M00000	TF,TF,TF,TF,TF,TF,TF,TF,TF,TF,TF,TF,TF,TF,TF,TF,TF,TF,TF,TF,TF,TF,TF,TF,TF,TF,TF,TF,TF,TF,TF,TF,TF,TF,TF,TF,TF,TF,TF,TF,TF,TF,TF,TF,TF,TF,TF,TF,TF,TF,TF,TF,TF,TF,TF,TF,TF,TF,TF,TF,TF,TF,TF,TF,TF,TF,TF,TF	Tmem74b,Fbxl16,Wdfy1,Cacna1i,Ro60,Pld3,Dhcr7,Pomc,Mb,Cd44,Ap2a2,Tpi1,Lsp1,Pcgf2,Prkar2b,Acvr1,Impdh1,Prkacb,Adcyap1r1,Cacna1c,Prkcz,Dlk1,Dok7,Prrc1,Slc25a31,Crhbp,Rai1,Abcg1,Grm4,Arhgap23,Myh14,Fbxo11,Gtf2a2,Ptbp3,Atcay,Serinc5,Dlgap2,Neto2,Pgghg,Tsku,Sik2,Pphln1,Ablim1,Znfx1,Tcf25,2310022A10Rik,Dtnbp1,Sh3bp4,Gmppa,Plpp3,Stk24,Rnps1,Immp1l,Lage3,Ears2,Tomm34,Cmtm6,Zcrb1,Atp5f1d,Efhd1,Borcs8,Dennd…	0.016
140	query_1	TRUE	0.0413019	4362	217	69	0.317972	0.0158184	TF:M12470_1	TF	Factor: Foxn1; motif: RGAMGC; match class: 1	21700	1179	TF:M12470	TF,TF,TF,TF,TF,TF,TF,TF,TF,TF,TF,TF,TF,TF,TF,TF,TF,TF,TF,TF,TF,TF,TF,TF,TF,TF,TF,TF,TF,TF,TF,TF,TF,TF,TF,TF,TF,TF,TF,TF,TF,TF,TF,TF,TF,TF,TF,TF,TF,TF,TF,TF,TF,TF,TF,TF,TF,TF,TF,TF,TF,TF,TF,TF,TF,TF,TF,TF,TF	Fbxl16,Exoc6b,Ccdc6,Rsbn1l,Wdfy1,Nfxl1,Farp1,Ro60,Kpna6,Dhcr7,Pomc,Got2,Enpp1,Pcgf2,Fas,Kif5c,Prkar2b,Cd81,Por,Nek1,Acyp2,Prkacb,Adcyap1r1,Erf,Sms,Prkcz,Anxa7,Dlk1,Prrc1,Nr1d1,Myo16,Rai1,Mtss2,Cyfip1,Fbxo11,Ptbp3,Serinc5,Rab3gap2,Mon1b,Neto2,Armc6,Sik2,Cmc2,Znfx1,Slco3a1,Bloc1s4,Dtnbp1,Gorasp1,Srgap2,Med28,Ppp1r16a,Smc6,Plpp3,Stk24,Grpel1,Rnps1,Ears2,Mrps28,Tomm34,Mrpl19,Efhd1,Slc23a2,Syt13,Nqo2,…	0.016
141	query_1	TRUE	0.0434688	6574	217	94	0.43318	0.0142988	TF:M01241	TF	Factor: BEN; motif: CWGCGAYA	21700	288	TF:M00000	TF,TF,TF,TF,TF,TF,TF,TF,TF,TF,TF,TF,TF,TF,TF,TF,TF,TF,TF,TF,TF,TF,TF,TF,TF,TF,TF,TF,TF,TF,TF,TF,TF,TF,TF,TF,TF,TF,TF,TF,TF,TF,TF,TF,TF,TF,TF,TF,TF,TF,TF,TF,TF,TF,TF,TF,TF,TF,TF,TF,TF,TF,TF,TF,TF,TF,TF,TF,TF,TF,TF,TF,TF,TF,TF,TF,TF,TF,TF,TF,TF,TF,TF,TF,TF,TF,TF,TF,TF,TF,TF,TF,TF,TF	Ccdc6,Pcdh10,Cacna1i,Nfxl1,Farp1,Gclm,Ddt,Kpna4,Cdk5r2,Dhcr7,Pomc,Got2,Enpp1,Ap2a2,Pcgf2,Ptpn6,Por,Acvr1,Nek1,Pkm,Acyp2,Opa1,Adcyap1r1,Nos3,Smad5,Cacna1c,Prkcz,Dlk1,2300009A05Rik,Dok7,Spout1,Arglu1,Prrc1,Gpr149,Samd5,Klhdc2,Rai1,Ripor1,Ranbp10,Fbxo11,Pdk1,Ano10,Ptbp3,Atcay,Bmp3,Serinc5,Slc9a7,Srp68,Armc6,Ttc12,Gatad2a,Cmc2,Angel2,Pphln1,Ablim1,Aldh1l1,Znfx1,Ubac2,Gle1,Tcf25,Slco3a1,Ubac1,Psmd2,Bl…	0.014
142	query_1	TRUE	0.0445852	4372	217	69	0.317972	0.0157823	TF:M00932_1	TF	Factor: Sp1; motif: NNGGGGCGGGGNN; match class: 1	21700	3329	TF:M00932	TF,TF,TF,TF,TF,TF,TF,TF,TF,TF,TF,TF,TF,TF,TF,TF,TF,TF,TF,TF,TF,TF,TF,TF,TF,TF,TF,TF,TF,TF,TF,TF,TF,TF,TF,TF,TF,TF,TF,TF,TF,TF,TF,TF,TF,TF,TF,TF,TF,TF,TF,TF,TF,TF,TF,TF,TF,TF,TF,TF,TF,TF,TF,TF,TF,TF,TF,TF,TF	Tmem74b,Fbxl16,Exoc6b,Farp1,Ro60,Nmt2,Dhcr7,Enpp1,Ap2a2,Pcgf2,Fas,Ptpn11,Cd81,Acvr1,Impdh1,Nek1,Pkm,Tuba4a,Erf,Cacna1c,2300009A05Rik,Dok7,Pip4p1,Arglu1,Slc25a31,Myo16,Arcn1,Rai1,Abcg1,Ripor1,Arhgap23,Dusp23,Ranbp10,Fbxo11,Actn1,Ano10,Ptbp3,Serinc5,Slc9a7,Neto2,Ttc12,Tctn1,Casp9,Sik2,Dpyd,Gatad2a,Cmc2,Angel2,Znfx1,Tcf25,Ubac1,Dtnbp1,Sh3bp4,Ppp1r16a,Smc6,Stk24,Zdhhc6,Chmp3,Gadd45gip1,Lage3,Tomm34,C…	0.016
143	query_1	TRUE	0.0446788	8649	217	116	0.534562	0.013412	TF:M04157	TF	Factor: Tfap2a; motif: TGCCCYNRGGGCA	21700	3726	TF:M00000	TF,TF,TF,TF,TF,TF,TF,TF,TF,TF,TF,TF,TF,TF,TF,TF,TF,TF,TF,TF,TF,TF,TF,TF,TF,TF,TF,TF,TF,TF,TF,TF,TF,TF,TF,TF,TF,TF,TF,TF,TF,TF,TF,TF,TF,TF,TF,TF,TF,TF,TF,TF,TF,TF,TF,TF,TF,TF,TF,TF,TF,TF,TF,TF,TF,TF,TF,TF,TF,TF,TF,TF,TF,TF,TF,TF,TF,TF,TF,TF,TF,TF,TF,TF,TF,TF,TF,TF,TF,TF,TF,TF,TF,TF,TF,TF,TF,TF,TF,TF,TF,TF,TF,TF,TF,TF,TF,TF,TF,TF,TF,TF,TF,TF,TF,TF	Tmem74b,Rsbn1l,Wdfy1,Cacna1i,Nfxl1,Farp1,Ntn1,Ddt,Kpna4,Kpna6,Cdk5r2,Klk1,Klk1b22,Ap2a2,Tpi1,Kif5c,Ptpn6,Prkar2b,Cd81,Por,Acvr1,Impdh1,Pkm,Golga3,Opa1,Gmeb2,Prkacb,Tuba4a,Adcyap1r1,Nos3,Cdh10,Sms,Cacna1c,Prkcz,Dlk1,2300009A05Rik,Dok7,2510002D24Rik,Spout1,Prrc1,Nr1d1,Samd5,Klhdc2,Myo16,Lrrk2,Arcn1,Crhbp,Abcg1,Grm4,Arhgap23,Isy1,Mtss2,Myh14,Cyfip1,Fbxo11,Actn1,Pdk1,Fam210a,Ano10,Ptbp3,Serinc5,Slc9a…	0.013
144	query_1	TRUE	0.0450054	9531	217	125	0.576037	0.0131151	TF:M01752	TF	Factor: ERG; motif: ACCGGAART	21700	970	TF:M00000	TF,TF,TF,TF,TF,TF,TF,TF,TF,TF,TF,TF,TF,TF,TF,TF,TF,TF,TF,TF,TF,TF,TF,TF,TF,TF,TF,TF,TF,TF,TF,TF,TF,TF,TF,TF,TF,TF,TF,TF,TF,TF,TF,TF,TF,TF,TF,TF,TF,TF,TF,TF,TF,TF,TF,TF,TF,TF,TF,TF,TF,TF,TF,TF,TF,TF,TF,TF,TF,TF,TF,TF,TF,TF,TF,TF,TF,TF,TF,TF,TF,TF,TF,TF,TF,TF,TF,TF,TF,TF,TF,TF,TF,TF,TF,TF,TF,TF,TF,TF,TF,TF,TF,TF,TF,TF,TF,TF,TF,TF,TF,TF,TF,TF,TF,TF,TF,TF,TF,TF,TF,TF,TF,TF,TF	Ccdc6,Rsbn1l,Pigg,Wdfy1,Nfxl1,Farp1,Ro60,Pld3,Cdk5r2,Nmt2,Dhcr7,Gosr1,Mb,Enpp1,Cd44,Ap2a2,Lsp1,Pcgf2,Ndn,Fas,Kif5c,Ptpn11,Acvr1,Nek1,Tyro3,Golga3,Acyp2,Mrps21,Opa1,Gmeb2,Timm10,Prkacb,Tuba4a,Adcyap1r1,Cdh10,Erf,Sms,Dlk1,2300009A05Rik,Tmem109,Spout1,Arglu1,Slc25a31,Samd5,Klhdc2,Arcn1,Crhbp,Rai1,Grm4,Isy1,Dusp23,Cyfip1,Gtf2a2,Fam210a,Ano10,Ptbp3,Atcay,Serinc5,Rab3gap2,Mon1b,Neto2,Casp9,Tmt1a,Tsku,S…	0.013
145	query_1	TRUE	0.0470293	9737	217	127	0.585253	0.013043	TF:M12470	TF	Factor: Foxn1; motif: RGAMGC	21700	1178	TF:M00000	TF,TF,TF,TF,TF,TF,TF,TF,TF,TF,TF,TF,TF,TF,TF,TF,TF,TF,TF,TF,TF,TF,TF,TF,TF,TF,TF,TF,TF,TF,TF,TF,TF,TF,TF,TF,TF,TF,TF,TF,TF,TF,TF,TF,TF,TF,TF,TF,TF,TF,TF,TF,TF,TF,TF,TF,TF,TF,TF,TF,TF,TF,TF,TF,TF,TF,TF,TF,TF,TF,TF,TF,TF,TF,TF,TF,TF,TF,TF,TF,TF,TF,TF,TF,TF,TF,TF,TF,TF,TF,TF,TF,TF,TF,TF,TF,TF,TF,TF,TF,TF,TF,TF,TF,TF,TF,TF,TF,TF,TF,TF,TF,TF,TF,TF,TF,TF,TF,TF,TF,TF,TF,TF,TF,TF,TF,TF	Tmem74b,Fbxl16,Exoc6b,Ccdc6,Rsbn1l,Wdfy1,Cacna1i,Nfxl1,Farp1,Ro60,Ddt,Kpna4,Kpna6,Cdk5r2,Nmt2,Dhcr7,Pomc,Got2,Enpp1,Ap2a2,Pcgf2,Fas,Kif5c,Prkar2b,Cd81,Por,Acvr1,Crkl,Nek1,Pkm,Tyro3,Acyp2,Prkacb,Adcyap1r1,Nos3,Cdh10,Erf,Sms,Cacna1c,Prkcz,Anxa7,Dlk1,2300009A05Rik,Dok7,Pip4p1,Tmem109,Spout1,Prrc1,Nr1d1,Slc25a31,Samd5,Myo16,Rai1,Grm4,Ripor1,Arhgap23,Dusp23,Mtss2,Cyfip1,Fbxo11,Actn1,Gtf2a2,Ano10,Ptbp3…	0.013
146	query_1	TRUE	0.0472855	10950	217	139	0.640553	0.0126941	TF:M07289_1	TF	Factor: GKLF; motif: NNNRGGNGNGGSN; match class: 1	21700	1379	TF:M07289	TF,TF,TF,TF,TF,TF,TF,TF,TF,TF,TF,TF,TF,TF,TF,TF,TF,TF,TF,TF,TF,TF,TF,TF,TF,TF,TF,TF,TF,TF,TF,TF,TF,TF,TF,TF,TF,TF,TF,TF,TF,TF,TF,TF,TF,TF,TF,TF,TF,TF,TF,TF,TF,TF,TF,TF,TF,TF,TF,TF,TF,TF,TF,TF,TF,TF,TF,TF,TF,TF,TF,TF,TF,TF,TF,TF,TF,TF,TF,TF,TF,TF,TF,TF,TF,TF,TF,TF,TF,TF,TF,TF,TF,TF,TF,TF,TF,TF,TF,TF,TF,TF,TF,TF,TF,TF,TF,TF,TF,TF,TF,TF,TF,TF,TF,TF,TF,TF,TF,TF,TF,TF,TF,TF,TF,TF,TF,TF,TF,TF,TF,TF,TF,…	Tmem74b,Fbxl16,Exoc6b,Ccdc6,Rsbn1l,Pigg,Pcdh10,Wdfy1,Cacna1i,Farp1,Ro60,Ntn1,Gclm,Ddt,Kpna4,Cdk5r2,Nmt2,Dhcr7,Pomc,Mb,Cd44,Klk1,Klk1b22,Ap2a2,Tpi1,Lsp1,Pcgf2,Fas,Kif5c,Ptpn6,Prkar2b,Ptpn11,Cd81,Por,Acvr1,Impdh1,Pkm,Golga3,Acyp2,Mrps21,Gmeb2,Prkacb,Adcyap1r1,Nos3,Hnrnph2,Cdh10,Erf,Smad5,Cacna1c,Prkcz,Anxa7,Dlk1,Dok7,Tmem109,Spout1,Prrc1,Gpr149,Slc25a31,Samd5,Klhdc2,Myo16,Lrrk2,Crhbp,Rai1,Abcg1,Grm…	0.013
147	query_1	TRUE	0.0474269	3384	217	57	0.262673	0.016844	TF:M00008_1	TF	Factor: Sp1; motif: GGGGCGGGGT; match class: 1	21700	3319	TF:M00008	TF,TF,TF,TF,TF,TF,TF,TF,TF,TF,TF,TF,TF,TF,TF,TF,TF,TF,TF,TF,TF,TF,TF,TF,TF,TF,TF,TF,TF,TF,TF,TF,TF,TF,TF,TF,TF,TF,TF,TF,TF,TF,TF,TF,TF,TF,TF,TF,TF,TF,TF,TF,TF,TF,TF,TF,TF	Tmem74b,Fbxl16,Exoc6b,Ccdc6,Wdfy1,Farp1,Ro60,Ntn1,Kpna4,Kpna6,Nmt2,Dhcr7,Enpp1,Ap2a2,Tpi1,Kif5c,Acvr1,Nek1,Timm10,Tuba4a,2300009A05Rik,Pip4p1,Arglu1,Slc25a31,Rai1,Abcg1,Ripor1,Arhgap23,Ranbp10,Actn1,Pdk1,Ano10,Ptbp3,Atcay,Serinc5,Rab3gap2,Tctn1,Casp9,Sik2,Dpyd,Angel2,Aldh1l1,Ubac2,Ubac1,Dtnbp1,Sh3bp4,Smc6,Eps8l2,Stk24,Tomm34,Tbcb,Naa38,Ndufb8,Pfn2,Cln8,Plod1,Ehmt2	0.017
