# Supplementary material
Source: Research Square preprint supplement (doi:10.21203/rs.3.rs-8738572/v1)
Supplement: Supplementary file 5 [file a81e505975a60b9a577aecce.xlsx]

## Sheet: Legends
Abbreviation	Description
log2FC	Log 2 Fold change
SE	Standard Error
DF	Degrees of Freedom
pvalue	Standard p-value
pvalueBH	Adjusted p-value using the Benjamini-Hochberg (BH)
WT	Wild Type SCN
KI	SIK1 Knock-in SCN

## Sheet: Sheet Description
Sheet	Description
SCN Proteomics stats	Statistical analysis of SCN proteomics (SIK1 KI vs WT)
Sik1_SCN_protein_GO	Functional analysis of proteomics by GO profiler

## Sheet: SCN Proteomics stats
	Index	Protein	Label	log2FC	SE	pvalue	gene_name	pvalueBH
1	2	A0A075B5L0;P01647;P01645;P01644;P01643	SCN KI_vs_WT	0.833462	0.27702	0.0237413	NA	0.252855
2	6	A0A075B5N9;P01668;P01659;P01665;P01672;P01671;P01670;P01669;P01667;P01666;P03977;P01664;P01660;P01657;P01656;P01654;P01673;P01655	SCN KI_vs_WT	0.280684	0.345691	0.447827	NA	0.849997
3	10	A0A075B5V1;A0A075B5V0;A0A075B5U4;A0A075B5V2;A0A0A6YVW3;A0A075B5Y4;A0A0A6YXA5;A0A075B5U7	SCN KI_vs_WT	0.155236	0.186865	0.422342	NA	0.839347
4	14	A0A075B5V1;P06330;P01757;P01756;A0A075B5V6	SCN KI_vs_WT	0.187745	0.516307	0.72246	NA	0.981285
5	18	A0A075B5Y1;P01750	SCN KI_vs_WT	NA	NA	NA	NA	NA
6	22	A0A087WQ44	SCN KI_vs_WT	-0.0363815	0.130864	0.785736	Srcap	1
7	26	A0A087WRI3	SCN KI_vs_WT	0.0753935	0.132707	0.590565	NA	0.916482
8	30	A0A087WRT4	SCN KI_vs_WT	0.00432163	0.0979	0.965512	Fat1	1
9	34	A0A0A6YXW6	SCN KI_vs_WT	1.02401	0.312411	0.0168698	NA	0.2041
10	38	A0A0A6YXW6;P01878	SCN KI_vs_WT	1.01314	0.326456	0.0210235	NA	0.235243
11	42	A0A0G2JDV3;Q000W5	SCN KI_vs_WT	-0.0475051	0.0917	0.623144	NA	0.932777
12	46	A0A0J9YTR2	SCN KI_vs_WT	0.0570788	0.0899	0.537233	NA	0.891291
13	50	A0A0N4SUI7	SCN KI_vs_WT	0.145616	0.27325	0.613251	NA	0.927745
14	54	A0A0U1RQ45	SCN KI_vs_WT	-0.00754536	0.152096	0.962044	NA	1
15	58	A0A140LIW3	SCN KI_vs_WT	-0.00896835	0.104403	0.932961	Frmpd3	1
16	62	A0A1B0GRG8	SCN KI_vs_WT	-0.061382	0.14471	0.678945	NA	0.959222
17	66	A0A1B0GSF9	SCN KI_vs_WT	-0.0141132	0.327874	0.967063	NA	1
18	70	A0A1B0GT27	SCN KI_vs_WT	0.0705713	0.0979	0.497995	NA	0.874882
19	74	A0A1D5RLD8	SCN KI_vs_WT	-0.341012	0.478177	0.502534	NA	0.876288
20	78	A0A1D5RLM8	SCN KI_vs_WT	NA	NA	NA	NA	NA
21	82	A0A1D5RLM8;Q80X60	SCN KI_vs_WT	NA	NA	NA	NA	NA
22	86	A0A1L1STD6	SCN KI_vs_WT	-0.301486	0.20239	0.162128	Inafm2	0.627889
23	90	A0A1L1SUL6	SCN KI_vs_WT	0.0160793	0.166695	0.926297	NA	1
24	94	A0A1W2P6Q9;P60007	SCN KI_vs_WT	-0.355574	0.290566	0.24454	NA	0.721666
25	98	A0A1W2P7J1	SCN KI_vs_WT	-0.0949373	0.0706	0.203518	NA	0.678104
26	102	A0A1W2P872	SCN KI_vs_WT	0.0393391	0.053	0.472341	Nova2	0.863273
27	106	A0A1Y7VJN6;P03987	SCN KI_vs_WT	0.237626	0.308176	0.45558	NA	0.855076
28	110	A0A1Y7VLQ2	SCN KI_vs_WT	0.398019	0.152815	0.0230308	NA	0.24831
29	114	A0A286YCV9	SCN KI_vs_WT	0.0357902	0.0881	0.691773	Kif13b	0.966008
30	118	A0A286YCX6	SCN KI_vs_WT	0.0122576	0.0471	0.799179	NA	1
31	122	A0A2I3BR81	SCN KI_vs_WT	-0.125255	0.11654	0.323781	NA	0.784762
32	126	A0A2I3BRN2	SCN KI_vs_WT	0.0828314	0.11019	0.48066	NA	0.86719
33	130	A0A2R8VKG2	SCN KI_vs_WT	-0.0248455	0.0716	0.734528	NA	0.988186
34	134	A0A338P6I9	SCN KI_vs_WT	-0.298762	0.166141	0.0973229	NA	0.520669
35	138	A0A338P7C9	SCN KI_vs_WT	-0.0584727	0.148629	0.700914	NA	0.970822
36	142	A0A494B9V8	SCN KI_vs_WT	-0.0499168	0.123421	0.693002	NA	0.966741
37	146	A0A494BB10	SCN KI_vs_WT	0.129265	0.213792	0.556686	NA	0.900332
38	150	A0A571BF58	SCN KI_vs_WT	0.212974	0.142849	0.1618	NA	0.627734
39	154	A0A571BF63	SCN KI_vs_WT	-0.0380479	0.12296	0.762299	NA	1
40	158	A0A5F8MPH2	SCN KI_vs_WT	0.117743	0.147178	0.43926	NA	0.846598
41	162	A0A5F8MPH8	SCN KI_vs_WT	-0.0523741	0.152622	0.743181	NA	0.992052
42	166	A0A5F8MPI9	SCN KI_vs_WT	-0.0232278	0.0533	0.670922	NA	0.956554
43	170	A0A5F8MPP0	SCN KI_vs_WT	0.256699	0.270444	0.361256	NA	0.809086
44	174	A0A5F8MQ13	SCN KI_vs_WT	-0.15607	0.164593	0.361724	NA	0.809086
45	178	A0A7N9VR94	SCN KI_vs_WT	-0.069077	0.283152	0.811385	NA	1
46	182	A0A991ENW0	SCN KI_vs_WT	-0.0851595	0.143689	0.564406	NA	0.904327
47	186	A0JLY1	SCN KI_vs_WT	-0.277638	0.26314	0.332002	Cfap210	0.789582
48	190	A1A5B6	SCN KI_vs_WT	0.0102319	0.0841	0.905232	Tbc1d25	1
49	194	A1L3P4	SCN KI_vs_WT	-0.0635066	0.0803	0.444448	Slc9a6	0.847581
50	198	A2A432	SCN KI_vs_WT	-0.00964151	0.111256	0.932371	Cul4b	1
51	202	A2A472	SCN KI_vs_WT	0.0505764	0.177141	0.780118	NA	1
52	206	A2A484	SCN KI_vs_WT	-0.118026	0.0771	0.15175	Zmynd8	0.612946
53	210	A2A4P0	SCN KI_vs_WT	-0.0706841	0.17219	0.688674	Dhx8	0.964386
54	214	A2A4U6	SCN KI_vs_WT	-0.0646393	0.0837	0.469462	Zfp334	0.86209
55	218	A2A5R2	SCN KI_vs_WT	0.0125576	0.0879	0.888772	Arfgef2	1
56	222	A2A5Z6	SCN KI_vs_WT	0.242031	0.247009	0.346505	Smurf2	0.79822
57	226	A2A654	SCN KI_vs_WT	-0.0755767	0.0959	0.446143	NA	0.848823
58	230	A2A690	SCN KI_vs_WT	-0.0280188	0.0373	0.467586	Tanc2	0.861176
59	234	A2A699	SCN KI_vs_WT	-0.0115862	0.0816	0.889482	Fam171a2	1
60	238	A2A6A1	SCN KI_vs_WT	-0.215044	0.153495	0.186546	Gpatch8	0.660534
61	242	A2A6Q5	SCN KI_vs_WT	-0.067637	0.106105	0.535804	Cdc27	0.890606
62	246	A2A6T1	SCN KI_vs_WT	0.0499644	0.0671	0.471056	Cdr2l	0.862486
63	250	A2A716	SCN KI_vs_WT	-0.130719	0.146535	0.389894	Osbpl7	0.823846
64	254	A2A791	SCN KI_vs_WT	0.00767059	0.0516	0.88439	Zmym4	1
65	258	A2A7S8	SCN KI_vs_WT	0.0651613	0.161332	0.693393	C77080	0.967132
66	262	A2A870	SCN KI_vs_WT	0.0126897	0.108002	0.910302	Fbf1	1
67	266	A2A891	SCN KI_vs_WT	0.00209075	0.0869	0.981211	Camta1	1
68	270	A2A8L1	SCN KI_vs_WT	-0.0259674	0.131885	0.847205	NA	1
69	274	A2A8L5	SCN KI_vs_WT	-0.00519879	0.0572	0.929095	Ptprf	1
70	278	A2A8R0	SCN KI_vs_WT	0.0531036	0.130557	0.691355	Zfyve9	0.965758
71	282	A2A8U2	SCN KI_vs_WT	-0.0225985	0.114883	0.847348	Tmem201	1
72	286	A2A8Z1	SCN KI_vs_WT	0.0711043	0.0721	0.343664	Osbpl9	0.796572
73	290	A2A9C3	SCN KI_vs_WT	-0.0242664	0.0883	0.788224	Szt2	1
74	294	A2A9Q0	SCN KI_vs_WT	-0.0870253	0.137425	0.538449	Fndc10	0.891626
75	298	A2A9T0	SCN KI_vs_WT	0.129561	0.276813	0.64814	Tbkbp1	0.94594
76	302	A2AAE1	SCN KI_vs_WT	-0.00873822	0.0267	0.749501	Bltp1	0.995189
77	306	A2AAJ9	SCN KI_vs_WT	0.119453	0.459553	0.799321	NA	1
78	310	A2AAY5	SCN KI_vs_WT	-0.0207685	0.0846	0.810164	Sh3pxd2b	1
79	314	A2AB59	SCN KI_vs_WT	-0.0193975	0.132821	0.886312	Arhgap27	1
80	318	A2ABV5	SCN KI_vs_WT	0.0458884	0.153117	0.769537	Med14	1
81	322	A2AC93	SCN KI_vs_WT	-0.0238183	0.144327	0.87434	Dnai2	1
82	326	A2ACJ2	SCN KI_vs_WT	0.020241	0.108205	0.857777	Faap100	1
83	330	A2ACP1	SCN KI_vs_WT	-0.0785508	0.151314	0.622257	Ttc39a	0.9324
84	334	A2ACQ1	SCN KI_vs_WT	0.0483189	0.11162	0.672776	NA	0.957304
85	338	A2ADA5	SCN KI_vs_WT	-0.0390744	0.0946	0.686964	Pusl1	0.96347
86	342	A2ADY9	SCN KI_vs_WT	-0.0327519	0.0567	0.574064	Ddi2	0.908792
87	346	A2AEN9	SCN KI_vs_WT	1.07906	0.472752	0.0414899	Gm5938	0.344086
88	350	A2AEP0	SCN KI_vs_WT	NA	NA	NA	Obp1b	NA
89	354	A2AEP0;A2BHD2	SCN KI_vs_WT	1.28888	0.717249	0.0975342	NA	0.521102
90	358	A2AEV7	SCN KI_vs_WT	0.0918298	0.176752	0.612832	Ccdc120	0.927695
91	362	A2AEY4	SCN KI_vs_WT	-0.161906	0.205033	0.459786	Map7d3	0.856783
92	366	A2AF33	SCN KI_vs_WT	0.36067	0.459542	0.447761	Tmsb15b1	0.849967
93	370	A2AF33;A2AF31	SCN KI_vs_WT	-0.155413	0.141956	0.295093	NA	0.763384
94	374	A2AF47	SCN KI_vs_WT	-0.0931562	0.0824	0.280172	Dock11	0.7542
95	378	A2AF53	SCN KI_vs_WT	-0.103841	0.0994	0.336305	NA	0.792076
96	382	A2AF53;Q8R3R5	SCN KI_vs_WT	0.0993567	0.124722	0.441145	NA	0.846957
97	386	A2AFR3	SCN KI_vs_WT	-0.0998138	0.0511	0.0743266	Frmpd4	0.463298
98	390	A2AFS3	SCN KI_vs_WT	0.00980736	0.133638	0.942707	Elapor1	1
99	394	A2AG50	SCN KI_vs_WT	0.0114758	0.10929	0.918108	Map7d2	1
100	398	A2AGL3	SCN KI_vs_WT	-0.157835	0.100978	0.169068	Ryr3	0.636772
101	402	A2AGT5	SCN KI_vs_WT	-0.0378121	0.0578	0.525188	Ckap5	0.886483
102	406	A2AH22	SCN KI_vs_WT	0.261332	0.2684	0.349442	Ambra1	0.800548
103	410	A2AHC3	SCN KI_vs_WT	-0.0232514	0.0439	0.60568	Camsap1	0.923317
104	414	A2AHG0	SCN KI_vs_WT	0.0162504	0.0823	0.846818	Lzts3	1
105	418	A2AHL1	SCN KI_vs_WT	-0.0925124	0.088	0.31364	Ano3	0.778119
106	422	A2AI05	SCN KI_vs_WT	0.0827286	0.0711	0.267426	Ndor1	0.744566
107	426	A2AIG8	SCN KI_vs_WT	-0.100433	0.121022	0.422815	Accs	0.839473
108	430	A2AIL4	SCN KI_vs_WT	-0.0523646	0.096	0.595254	Ndufaf6	0.918567
109	434	A2AIP0	SCN KI_vs_WT	0.0890706	0.26166	0.745153	Cimip2b	0.993281
110	438	A2AIR5	SCN KI_vs_WT	0.0235415	0.117156	0.84411	Grin3a	1
111	442	A2AIV2	SCN KI_vs_WT	-0.131915	0.107286	0.242423	Virma	0.720121
112	446	A2AJ15	SCN KI_vs_WT	-0.125416	0.10563	0.258075	Man1b1	0.735215
113	450	A2AJ72	SCN KI_vs_WT	0.049864	0.0923	0.598967	Fubp3	0.919988
114	454	A2AJ88	SCN KI_vs_WT	0.0549972	0.0607	0.383022	Pnpla7	0.820651
115	458	A2AJA9	SCN KI_vs_WT	-0.0475599	0.0668	0.490028	Ajm1	0.870327
116	462	A2AJI0	SCN KI_vs_WT	0.063709	0.0989	0.531494	Map7d1	0.888798
117	466	A2AJL3	SCN KI_vs_WT	0.092504	0.117909	0.447937	Fggy	0.850121
118	470	A2AJQ3	SCN KI_vs_WT	-0.185963	0.164921	0.281536	Dpy19l4	0.755138
119	474	A2AJT4	SCN KI_vs_WT	-0.0166317	0.0914	0.858686	NA	1
120	478	A2AJW4	SCN KI_vs_WT	0.0603212	0.224898	0.793089	Ppp1r3d	1
121	482	A2AJW5	SCN KI_vs_WT	-0.0377719	0.121026	0.760323	Fam217b	1
122	486	A2AKB4	SCN KI_vs_WT	0.0511885	0.162245	0.757801	Frmpd1	0.999554
123	490	A2AKB9	SCN KI_vs_WT	NA	NA	NA	Dcaf10	NA
124	494	A2AKG8	SCN KI_vs_WT	-0.0811707	0.0783	0.320175	Focad	0.782703
125	498	A2ALI5	SCN KI_vs_WT	0.064047	0.136432	0.647168	Ajap1	0.945459
126	502	A2ALK8	SCN KI_vs_WT	NA	NA	NA	Ptpn3	NA
127	506	A2ALS5	SCN KI_vs_WT	-0.0773059	0.0557	0.190573	Rap1gap	0.663615
128	510	A2ALU4	SCN KI_vs_WT	0.00714129	0.0368	0.849202	Shroom2	1
129	514	A2ALU4;Q1W617	SCN KI_vs_WT	-0.0580117	0.171088	0.740413	NA	0.99047
130	518	A2ALU4;Q9QXN0	SCN KI_vs_WT	-0.159134	0.258676	0.54992	NA	0.896531
131	522	A2ALW2	SCN KI_vs_WT	0.0689798	0.14028	0.631783	Zkscan16	0.937587
132	526	A2AM29	SCN KI_vs_WT	-0.0510272	0.0525	0.368963	Mllt3	0.813565
133	530	A2AMW3	SCN KI_vs_WT	-0.134419	0.22557	0.573012	Gabre	0.908359
134	534	A2AN08	SCN KI_vs_WT	-0.00393906	0.0405	0.924138	Ubr4	1
135	538	A2ANU3	SCN KI_vs_WT	-0.094824	0.127208	0.470364	Syndig1	0.862435
136	542	A2AP18	SCN KI_vs_WT	0.065787	0.07	0.366065	Plch2	0.811586
137	546	A2APT9	SCN KI_vs_WT	0.0711632	0.103981	0.506733	Klhdc7a	0.878191
138	550	A2APV2	SCN KI_vs_WT	0.020651	0.0443	0.649512	Fmnl2	0.9465
139	554	A2APX8	SCN KI_vs_WT	-0.0963652	0.144027	0.516113	Scn1a	0.883143
140	558	A2APY7	SCN KI_vs_WT	0.0620182	0.0576	0.302626	Ndufaf5	0.769254
141	562	A2AQ19	SCN KI_vs_WT	-0.0135953	0.0371	0.72061	Rtf1	0.980649
142	566	A2AQ25	SCN KI_vs_WT	-0.0194881	0.0553	0.730751	Etl4	0.9863
143	570	A2AQW0	SCN KI_vs_WT	0.211781	0.302281	0.496905	Map3k15	0.87416
144	574	A2AR02	SCN KI_vs_WT	-0.136487	0.0913	0.16082	Ppig	0.626143
145	578	A2AR50	SCN KI_vs_WT	0.208101	0.108929	0.0802608	Ralgps1	0.477624
146	582	A2ARP1	SCN KI_vs_WT	-0.0683518	0.0625	0.295534	Ppip5k1	0.76392
147	586	A2ARS0	SCN KI_vs_WT	-0.282271	0.201339	0.186259	Ankrd63	0.660495
148	590	A2ASI5	SCN KI_vs_WT	-0.0770277	0.184856	0.684261	Scn3a	0.96187
149	594	A2ASQ1	SCN KI_vs_WT	-0.0596888	0.0583	0.32576	NA	0.785524
150	598	A2ASS6	SCN KI_vs_WT	0.275787	0.231768	0.257086	NA	0.73445
151	602	A2ASZ8	SCN KI_vs_WT	0.0090411	0.102741	0.931329	Slc25a25	1
152	606	A2AT37	SCN KI_vs_WT	-0.0692108	0.0491	0.184449	Upf2	0.658346
153	610	A2ATK9	SCN KI_vs_WT	-0.0615724	0.0871	0.49317	Fam171a1	0.872239
154	614	A2ATU0	SCN KI_vs_WT	0.504889	0.186215	0.0189092	Dhtkd1	0.220207
155	618	A2AU34	SCN KI_vs_WT	0.297529	0.0971	0.0221057	Tmem74b	0.242093
156	622	A2AU72	SCN KI_vs_WT	-0.312435	0.143431	0.0722308	Armc3	0.456101
157	626	A2AUP1	SCN KI_vs_WT	0.164709	0.0743	0.0685655	Pfkfb3	0.444426
158	630	A2AV25	SCN KI_vs_WT	-0.061242	0.0482	0.227839	Fibcd1	0.704397
159	634	A2AWA9	SCN KI_vs_WT	-0.00373073	0.0416	0.930026	Rabgap1	1
160	638	A2AWP8	SCN KI_vs_WT	-0.0126179	0.183191	0.946221	Arhgef10l	1
161	642	A2AWR3	SCN KI_vs_WT	NA	NA	NA	Gpr155	NA
162	646	A2BDX3	SCN KI_vs_WT	0.00725296	0.0547	0.896644	Mocs3	1
163	650	A2BE28	SCN KI_vs_WT	-0.0465085	0.112758	0.687274	Las1l	0.963511
164	654	A2BG91;A2ART4;A2ART0	SCN KI_vs_WT	NA	NA	NA	NA	NA
165	658	A2BH40	SCN KI_vs_WT	-0.0213413	0.0446	0.640756	Arid1a	0.942518
166	662	A2CG49	SCN KI_vs_WT	-0.0150743	0.0491	0.764273	Kalrn	1
167	666	A2CG63	SCN KI_vs_WT	0.00151998	0.0921	0.987373	Arid4b	1
168	670	A2RS43	SCN KI_vs_WT	-0.00994854	0.0618	0.874788	Pcdh7	1
169	674	A2RSJ4	SCN KI_vs_WT	-0.0239745	0.0792	0.767275	Bltp3b	1
170	678	A2RSQ0	SCN KI_vs_WT	-0.024258	0.0729	0.744976	Dennd5b	0.993281
171	682	A2RSX7	SCN KI_vs_WT	-0.0318884	0.0637	0.625481	Tyw5	0.934183
172	686	A2RSY6	SCN KI_vs_WT	0.11932	0.0832	0.177001	Trmt1l	0.647533
173	690	A2RT62	SCN KI_vs_WT	-0.169772	0.0527	0.00729558	Fbxl16	0.120231
174	694	A2RT67	SCN KI_vs_WT	0.505334	0.215483	0.0574403	Dennd3	0.404573
175	698	A2RTH5	SCN KI_vs_WT	0.0495405	0.135728	0.721464	Lcmt1	0.980936
176	702	A2RTL5	SCN KI_vs_WT	-0.0271698	0.0804	0.741363	Rsrc2	0.991064
177	706	A2TJV2	SCN KI_vs_WT	-0.0645228	0.265136	0.811839	Palm3	1
178	710	A3KFM7	SCN KI_vs_WT	-0.256385	0.131917	0.099951	Chd6	0.525851
179	714	A3KFX0	SCN KI_vs_WT	0.0147412	0.123897	0.90726	Nt5c1a	1
180	718	A3KFX0;Q91YE9	SCN KI_vs_WT	0.144004	0.124841	0.271162	NA	0.747978
181	722	A3KGB4	SCN KI_vs_WT	-0.124444	0.140013	0.391576	Tbc1d8b	0.824627
182	726	A3KGK3	SCN KI_vs_WT	-0.177001	0.207177	0.409646	NA	0.834928
183	730	A3KGS3	SCN KI_vs_WT	0.0220866	0.0949	0.819924	Ralgapa2	1
184	734	A3KGV1	SCN KI_vs_WT	0.0856473	0.0879	0.367416	Odf2	0.812594
185	738	A3KMP2	SCN KI_vs_WT	0.0451595	0.0855	0.606996	Ttc38	0.923814
186	742	A4FUP9	SCN KI_vs_WT	-0.0068729	0.143341	0.962547	Glt1d1	1
187	746	A5H0M4	SCN KI_vs_WT	-0.184178	0.124815	0.190504	Poteg	0.663615
188	750	A6H5Y3	SCN KI_vs_WT	0.0336311	0.0776	0.672377	Mtr	0.957238
189	754	A6H5Z3	SCN KI_vs_WT	-0.0897193	0.0411	0.0498515	Exoc6b	0.377512
190	758	A6H603	SCN KI_vs_WT	0.0788906	0.292791	0.792166	Nwd1	1
191	762	A6H611	SCN KI_vs_WT	0.0142749	0.0785	0.858686	Mipep	1
192	766	A6H619	SCN KI_vs_WT	0.256866	0.176386	0.170979	Phrf1	0.638703
193	770	A6H630	SCN KI_vs_WT	0.0301879	0.075	0.694464	Armt1	0.967477
194	774	A6H639	SCN KI_vs_WT	-0.137618	0.144382	0.377317	Tcte1	0.818344
195	778	A6H650	SCN KI_vs_WT	0.139891	0.114005	0.243332	Rasgef1a	0.720789
196	782	A6H6A9	SCN KI_vs_WT	-0.0341492	0.0652	0.610142	Rabgap1l	0.925794
197	786	A6H6E2	SCN KI_vs_WT	0.0314774	0.0764	0.694676	Mmrn2	0.967635
198	790	A6H6J9	SCN KI_vs_WT	0.0236449	0.0874	0.791376	NA	1
199	794	A6H6S0	SCN KI_vs_WT	-0.0383887	0.0871	0.667062	Herc3	0.954772
200	798	A6H8H2	SCN KI_vs_WT	-0.0144644	0.0827	0.864031	Dennd4c	1
201	802	A6H8H5	SCN KI_vs_WT	-0.239169	0.156975	0.153518	Kcnb2	0.615498
202	806	A6X919	SCN KI_vs_WT	-0.159261	0.133924	0.257364	Dpy19l1	0.73464
203	810	A6X919;P0CW70	SCN KI_vs_WT	-0.118314	0.152887	0.468396	NA	0.8615
204	814	A6X935	SCN KI_vs_WT	0.12862	0.169346	0.462207	Itih4	0.858218
205	818	A8C756	SCN KI_vs_WT	0.0255887	0.0967	0.800133	Thada	1
206	822	A8DUK4	SCN KI_vs_WT	0.211449	0.383024	0.591047	Hbb-bs	0.916688
207	826	A8Y5H7	SCN KI_vs_WT	0.0155398	0.0545	0.780269	Sec14l1	1
208	830	A9Z1V5	SCN KI_vs_WT	0.0382643	0.112775	0.74025	Vwa5b1	0.990388
209	834	B0F2B4	SCN KI_vs_WT	-0.116728	0.167695	0.499642	NA	0.875282
210	838	B0V2N1	SCN KI_vs_WT	-0.0308623	0.0638	0.637228	Ptprs	0.940784
211	842	B1AR13	SCN KI_vs_WT	0.0442692	0.146953	0.768383	Cisd3	1
212	846	B1AR17	SCN KI_vs_WT	0.0588626	0.0881	0.516833	Chd3	0.88369
213	850	B1AR51	SCN KI_vs_WT	0.00532143	0.171931	0.975817	Dnah9	1
214	854	B1AR51;Q69Z23	SCN KI_vs_WT	0.0883157	0.141382	0.555188	NA	0.899307
215	858	B1ART2	SCN KI_vs_WT	-0.0149803	0.0404	0.717319	Vps13d	0.979105
216	862	B1ARW8	SCN KI_vs_WT	0.1597	0.250328	0.535483	1110065P20Rik	0.890462
217	866	B1AS29	SCN KI_vs_WT	-0.0701442	0.0813	0.405289	Grik3	0.832303
218	870	B1AUC7	SCN KI_vs_WT	-0.0308473	0.137154	0.829514	Arhgap36	1
219	874	B1AUE5	SCN KI_vs_WT	-0.0465003	0.0702	0.52049	Pex10	0.88512
220	878	B1AUH1	SCN KI_vs_WT	0.0551841	0.110021	0.625039	Ptpru	0.934005
221	882	B1AUN2	SCN KI_vs_WT	-0.113545	0.106397	0.306889	Eif2b3	0.772717
222	886	B1AVP0	SCN KI_vs_WT	-0.0148239	0.162773	0.928939	NA	1
223	890	B1AVZ0	SCN KI_vs_WT	0.0186676	0.047	0.698394	Uprt	0.969719
224	894	B1AWC9	SCN KI_vs_WT	-0.00911362	0.155727	0.954295	NA	1
225	898	B1AWN6	SCN KI_vs_WT	-0.0277487	0.0825	0.742482	Scn2a	0.991631
226	902	B1AXH1	SCN KI_vs_WT	-0.0114101	0.135172	0.934121	NA	1
227	906	B1AXP6	SCN KI_vs_WT	-0.0379161	0.118783	0.755059	Tomm5	0.997954
228	910	B1AXV0	SCN KI_vs_WT	0.134914	0.0892	0.156318	Frrs1l	0.618356
229	914	B1AY10	SCN KI_vs_WT	0.0653842	0.0571	0.274481	Nfx1	0.750625
230	918	B1AY13	SCN KI_vs_WT	-0.0536943	0.0531	0.332157	Usp24	0.789596
231	922	B1AYL1	SCN KI_vs_WT	0.0298621	0.193697	0.880039	Scn7a	1
232	926	B1AZA5	SCN KI_vs_WT	0.0507558	0.111465	0.656985	NA	0.949137
233	930	B1AZI6	SCN KI_vs_WT	0.101132	0.0511	0.0712975	Thoc2	0.452974
234	934	B1AZP2	SCN KI_vs_WT	-0.0587679	0.0708	0.422416	Dlgap4	0.839347
235	938	B1AZR0	SCN KI_vs_WT	0.239998	0.140151	0.112513	Klhl4	0.554077
236	942	B2B9E1	SCN KI_vs_WT	0.384661	0.247776	0.146517	Triqk	0.604698
237	946	B2KF50	SCN KI_vs_WT	-0.0112267	0.104382	0.916127	Bltp3a	1
238	950	B2RQC6	SCN KI_vs_WT	0.0636236	0.0486	0.21461	Cad	0.689831
239	954	B2RQC6;Q8C196	SCN KI_vs_WT	-0.0166086	0.0452	0.719629	NA	0.980218
240	958	B2RQG2	SCN KI_vs_WT	-0.0985834	0.0736	0.20532	Phf3	0.680128
241	962	B2RR83	SCN KI_vs_WT	0.017499	0.0777	0.82552	Ythdc2	1
242	966	B2RRD7;B2KF05	SCN KI_vs_WT	-0.0573563	0.125563	0.66389	NA	0.953418
243	970	B2RRE7	SCN KI_vs_WT	0.0281426	0.0582	0.637255	Otud4	0.940784
244	974	B2RSH2	SCN KI_vs_WT	0.109394	0.0878	0.236719	Gnai1	0.714418
245	978	B2RUJ5	SCN KI_vs_WT	-0.0478788	0.0598	0.439235	Apba1	0.846598
246	982	B2RUR8	SCN KI_vs_WT	0.0390275	0.124705	0.759684	Otud7b	1
247	986	B2RUS7	SCN KI_vs_WT	-0.0775074	0.116206	0.517403	Abcc8	0.884075
248	990	B2RUS7;P70170	SCN KI_vs_WT	0.407075	0.203712	0.0688621	NA	0.445337
249	994	B2RVB9	SCN KI_vs_WT	NA	NA	NA	Tmem243	NA
250	998	B2RVL6	SCN KI_vs_WT	0.101428	0.147499	0.504744	Zcchc24	0.877199
251	1002	B2RW11	SCN KI_vs_WT	-0.138385	0.0784	0.102925	Ankrd34a	0.533249
252	1006	B2RWC4	SCN KI_vs_WT	-0.206643	0.11516	0.0979628	Lrrc73	0.521518
253	1010	B2RWJ3	SCN KI_vs_WT	-0.0928154	0.135777	0.507221	Tmem240	0.878459
254	1014	B2RWS6	SCN KI_vs_WT	0.0217383	0.16028	0.894365	Ep300	1
255	1018	B2RX14	SCN KI_vs_WT	-0.0487695	0.197753	0.809372	Tut4	1
256	1022	B2RXA1	SCN KI_vs_WT	-0.198414	0.113294	0.105383	Plcxd2	0.538324
257	1026	B2RXC1	SCN KI_vs_WT	0.0155916	0.0801	0.848922	Trappc11	1
258	1030	B2RXC2	SCN KI_vs_WT	0.055709	0.109723	0.620851	Itpkb	0.931608
259	1034	B2RXC6	SCN KI_vs_WT	-0.0249498	0.0622	0.695588	Polr3a	0.96824
260	1038	B2RXE2	SCN KI_vs_WT	-0.0756031	0.123476	0.551774	Slc9a5	0.897112
261	1042	B2RXQ2	SCN KI_vs_WT	0.00238809	0.0532	0.964938	Ppfia1	1
262	1046	B2RXR6	SCN KI_vs_WT	0.0414596	0.112089	0.717916	Ankrd44	0.979464
263	1050	B2RXS3	SCN KI_vs_WT	0.00327468	0.0878	0.97087	NA	1
264	1054	B2RXS4	SCN KI_vs_WT	-0.0130752	0.0447	0.77472	Plxnb2	1
265	1058	B2RXT3	SCN KI_vs_WT	-0.0478313	0.0741	0.530561	Ogdhl	0.888331
266	1062	B2RXV4	SCN KI_vs_WT	0.12685	0.234105	0.597839	Flvcr1	0.919359
267	1066	B2RY04	SCN KI_vs_WT	-0.0180607	0.139861	0.899392	Dock5	1
268	1070	B2RY50	SCN KI_vs_WT	-0.00372787	0.22831	0.987502	NA	1
269	1074	B2RY56	SCN KI_vs_WT	-0.0285763	0.109316	0.798208	Rbm25	1
270	1078	B5TVM2	SCN KI_vs_WT	0.00966206	0.0529	0.858209	Ildr2	1
271	1082	B7ZMP1	SCN KI_vs_WT	0.0594077	0.0729	0.431114	Xpnpep3	0.842782
272	1086	B8JJ69	SCN KI_vs_WT	-0.114514	0.0695	0.125225	2310061I04Rik	0.574416
273	1090	B8JKV0	SCN KI_vs_WT	-0.204202	0.169803	0.252329	Amn1	0.72923
274	1094	B8QI36	SCN KI_vs_WT	-0.0363427	0.0455	0.439734	Ppfia4	0.846686
275	1098	B8ZXI1	SCN KI_vs_WT	-0.0826992	0.0993	0.421088	Qtrt2	0.83852
276	1102	B9EHT4	SCN KI_vs_WT	0.0663089	0.0633	0.315245	Clip3	0.778881
277	1106	B9EJ54	SCN KI_vs_WT	-0.004546	0.052	0.931721	Nup205	1
278	1110	B9EJ80	SCN KI_vs_WT	0.0224875	0.0502	0.661864	Pdzd8	0.952289
279	1114	B9EJ86	SCN KI_vs_WT	-0.0585607	0.0564	0.319371	Osbpl8	0.782061
280	1118	B9EJA2	SCN KI_vs_WT	-0.0148227	0.0601	0.809295	Cttnbp2	1
281	1122	B9EJI9	SCN KI_vs_WT	0.00995076	0.16495	0.952889	Tmem229a	1
282	1126	B9EJR8	SCN KI_vs_WT	-0.0475091	0.16883	0.783195	Dnaaf5	1
283	1130	B9EKI3	SCN KI_vs_WT	-0.03979	0.0539	0.474229	Tmf1	0.864207
284	1134	B9EKR1	SCN KI_vs_WT	-0.0760325	0.105593	0.485282	Ptprz1	0.869065
285	1138	C0HK80;C0HK79	SCN KI_vs_WT	0.0233874	0.100498	0.819905	NA	1
286	1142	C0HKD9;C0HKD8	SCN KI_vs_WT	0.0576508	0.0901	0.534143	NA	0.890238
287	1146	C0HKG6;C0HKG5	SCN KI_vs_WT	-0.0751792	0.110209	0.508098	NA	0.879004
288	1150	D3YTP3	SCN KI_vs_WT	-0.0118872	0.0859	0.892206	Mtx3	1
289	1154	D3YUB6	SCN KI_vs_WT	0.0474734	0.0746	0.536518	NA	0.890901
290	1158	D3YUE4	SCN KI_vs_WT	-0.228168	0.158064	0.174469	Fam151b	0.643447
291	1162	D3YUJ3	SCN KI_vs_WT	0.0298045	0.0746	0.696658	NA	0.968526
292	1166	D3YVE8	SCN KI_vs_WT	-0.0944638	0.0854	0.290546	Slc35g2	0.7594
293	1170	D3YVF0	SCN KI_vs_WT	-0.060112	0.0691	0.401722	Akap5	0.830528
294	1174	D3YVL2	SCN KI_vs_WT	0.139041	0.17877	0.46626	Cfap70	0.860496
295	1178	D3YVV3	SCN KI_vs_WT	-0.0919515	0.148828	0.54823	Ankrd29	0.896075
296	1182	D3YWQ0	SCN KI_vs_WT	-0.00900864	0.0593	0.881826	Dgki	1
297	1186	D3YXJ0	SCN KI_vs_WT	-0.0328161	0.0456	0.485106	Dgkh	0.869065
298	1190	D3YXJ5	SCN KI_vs_WT	0.0653283	0.150252	0.671431	Lratd2	0.956867
299	1194	D3YXK0	SCN KI_vs_WT	-0.00137123	0.0492	0.978234	Jakmip2	1
300	1198	D3YXK2	SCN KI_vs_WT	0.0582082	0.0708	0.427072	Safb	0.841534
301	1202	D3YXL0	SCN KI_vs_WT	0.123731	0.0917	0.22594	NA	0.701644
302	1206	D3YYY8	SCN KI_vs_WT	-0.0949624	0.109354	0.402211	Arhgef26	0.830596
303	1210	D3YZG8	SCN KI_vs_WT	-0.128309	0.0808	0.138092	Mthfd2l	0.592128
304	1214	D3YZI9	SCN KI_vs_WT	0.0890112	0.0554	0.134088	Pgbd5	0.587464
305	1218	D3YZP9	SCN KI_vs_WT	-0.111103	0.0507	0.0489676	Ccdc6	0.373778
306	1222	D3YZU1	SCN KI_vs_WT	-0.0318369	0.0405	0.446932	Shank1	0.849382
307	1226	D3YZZ5	SCN KI_vs_WT	0.134368	0.147743	0.381006	Tmed7	0.819895
308	1230	D3Z0K6	SCN KI_vs_WT	0.227579	0.0708	0.0182342	Rsbn1l	0.214831
309	1234	D3Z0M9	SCN KI_vs_WT	-0.0599238	0.0663	0.384031	Ddx23	0.821358
310	1238	D3Z286	SCN KI_vs_WT	-0.0776204	0.197159	0.700712	Tmppe	0.970775
311	1242	D3Z2H9	SCN KI_vs_WT	0.155162	0.191917	0.43455	NA	0.844572
312	1246	D3Z2R5	SCN KI_vs_WT	0.120514	0.120256	0.336052	Selenon	0.792035
313	1250	D3Z2X2	SCN KI_vs_WT	NA	NA	NA	NA	NA
314	1254	D3Z3N4	SCN KI_vs_WT	-0.0510099	0.0784	0.527474	Hnrnph3	0.886795
315	1258	D3Z3Y1	SCN KI_vs_WT	-0.221539	0.0983	0.0436969	Pigg	0.352763
316	1262	D3Z497;Q9WTZ1	SCN KI_vs_WT	-0.0678146	0.126183	0.600794	NA	0.920977
317	1266	D3Z4S3	SCN KI_vs_WT	0.0325214	0.0978	0.745147	Ptrhd1	0.993281
318	1270	D3Z649	SCN KI_vs_WT	-0.0732223	0.129719	0.582834	Kcnt2	0.912404
319	1274	D3Z690	SCN KI_vs_WT	-0.0421266	0.0665	0.549982	Izumo4	0.896531
320	1278	D3Z6Q9	SCN KI_vs_WT	-0.108441	0.131274	0.424884	NA	0.840468
321	1282	D3Z7H4	SCN KI_vs_WT	-0.226202	0.172961	0.215434	Gsg1l	0.690947
322	1286	D3Z7H8	SCN KI_vs_WT	-0.0490844	0.118393	0.692859	Cilp2	0.966654
323	1290	D3Z7P3	SCN KI_vs_WT	-0.0595028	0.0656	0.382135	Gls	0.820263
324	1294	D3Z7Q2	SCN KI_vs_WT	0.150417	0.137019	0.293839	Smim20	0.762066
325	1298	D3Z7X0	SCN KI_vs_WT	-0.0673259	0.310405	0.831933	Acad12	1
326	1302	D4AFX7	SCN KI_vs_WT	-0.0519817	0.0476	0.296424	NA	0.764731
327	1306	E0CX23	SCN KI_vs_WT	-0.0179708	0.132998	0.896936	Umad1	1
328	1310	E0CZ16	SCN KI_vs_WT	-0.0371694	0.0883	0.681331	NA	0.960687
329	1314	E0CZ22	SCN KI_vs_WT	-0.0217805	0.0919	0.816665	Mroh1	1
330	1318	E1U8D0	SCN KI_vs_WT	0.0592544	0.0708	0.419275	NA	0.838176
331	1322	E9PUD6	SCN KI_vs_WT	0.00860893	0.0698	0.905819	Zscan18	1
332	1326	E9PUL5	SCN KI_vs_WT	-0.0623204	0.241648	0.800856	Prrt2	1
333	1330	E9PUQ8	SCN KI_vs_WT	0.144417	0.10866	0.208542	Dgkd	0.683326
334	1334	E9PUR0	SCN KI_vs_WT	-0.0270821	0.125538	0.832823	Ankhd1	1
335	1338	E9PV24	SCN KI_vs_WT	0.0653732	0.223688	0.775086	Fga	1
336	1342	E9PV24;CON__P02672	SCN KI_vs_WT	0.178643	0.199219	0.404411	NA	0.831785
337	1346	E9PV26	SCN KI_vs_WT	0.0718044	0.0807	0.391256	Prr36	0.824569
338	1350	E9PV86	SCN KI_vs_WT	-0.0973932	0.0915	0.30819	NA	0.773637
339	1354	E9PV86;Q5RJH2	SCN KI_vs_WT	0.0801247	0.102457	0.463929	NA	0.859589
340	1358	E9PVA8	SCN KI_vs_WT	-0.010731	0.0499	0.833206	Gcn1	1
341	1362	E9PVB5	SCN KI_vs_WT	-0.128957	0.0733	0.103961	Ttc17	0.53533
342	1366	E9PVD3	SCN KI_vs_WT	0.0121408	0.229325	0.95865	Dchs1	1
343	1370	E9PVZ8	SCN KI_vs_WT	0.00765724	0.0439	0.864497	Golgb1	1
344	1374	E9PW37	SCN KI_vs_WT	-0.0251861	0.0391	0.531679	Rasal2	0.888983
345	1378	E9PW83	SCN KI_vs_WT	-0.0592713	0.051	0.267359	Fam184a	0.744513
346	1382	E9PW83;P10284;Q08624	SCN KI_vs_WT	0.0602937	0.079	0.474361	NA	0.864402
347	1386	E9PWM3	SCN KI_vs_WT	0.0349196	0.0681	0.617519	Armcx4	0.930008
348	1390	E9PWQ3	SCN KI_vs_WT	0.0309381	0.219652	0.890325	NA	1
349	1394	E9PWR4	SCN KI_vs_WT	-0.0321194	0.0541	0.563965	NA	0.904017
350	1398	E9PWW6	SCN KI_vs_WT	-0.0844637	0.107527	0.462038	Zc3h7a	0.858218
351	1402	E9PWW9	SCN KI_vs_WT	0.00392073	0.0903	0.966076	Rsf1	1
352	1406	E9PX28	SCN KI_vs_WT	-0.0996087	0.0441	0.0432022	Pcdh10	0.351182
353	1410	E9PX28;Q8VHR0	SCN KI_vs_WT	0.147459	0.13797	0.306201	NA	0.772269
354	1414	E9PX29	SCN KI_vs_WT	-0.0371631	0.0818	0.657656	Sptbn4	0.949597
355	1418	E9PX29;Q66JV7	SCN KI_vs_WT	0.19704	0.137589	0.177646	NA	0.648257
356	1422	E9PX68	SCN KI_vs_WT	0.0898106	0.200559	0.662273	Slc4a1ap	0.952479
357	1426	E9PXF0	SCN KI_vs_WT	-0.0662629	0.0732	0.383024	Pcdh17	0.820651
358	1430	E9PXF8	SCN KI_vs_WT	-0.0236034	0.0551	0.676004	Sbf2	0.958698
359	1434	E9PY16	SCN KI_vs_WT	-0.0316876	0.0696	0.657067	Adap1	0.949138
360	1438	E9PY28	SCN KI_vs_WT	0.187704	0.287207	0.537628	NA	0.891406
361	1442	E9PY46	SCN KI_vs_WT	0.153212	0.138721	0.291047	Ift140	0.759561
362	1446	E9PY62	SCN KI_vs_WT	0.176456	0.235637	0.468375	Cntnap3	0.8615
363	1450	E9PYD1	SCN KI_vs_WT	-0.0982566	0.097	0.330977	Fam98c	0.789422
364	1454	E9PYF4	SCN KI_vs_WT	-0.0827582	0.093	0.390863	Lmo7	0.824365
365	1458	E9PYF7	SCN KI_vs_WT	0.34031	0.178696	0.0811028	Ap1ar	0.480084
366	1462	E9PYG6	SCN KI_vs_WT	-0.0946921	0.0742	0.226142	Rasa1	0.701644
367	1466	E9PYH6	SCN KI_vs_WT	0.104524	0.106838	0.347218	Setd1a	0.79872
368	1470	E9PYL2	SCN KI_vs_WT	0.193198	0.115987	0.121645	Prr12	0.568361
369	1474	E9PYP2	SCN KI_vs_WT	0.027624	0.150208	0.857159	Nbeal1	1
370	1478	E9PYQ0	SCN KI_vs_WT	0.115754	0.0769	0.182783	NA	0.656176
371	1482	E9PYR1	SCN KI_vs_WT	0.0229022	0.096	0.815378	NA	1
372	1486	E9PZ11	SCN KI_vs_WT	-0.0450588	0.18717	0.817773	Zbtb47	1
373	1490	E9PZ19	SCN KI_vs_WT	-0.0614051	0.0986	0.54528	NA	0.894873
374	1494	E9PZ66	SCN KI_vs_WT	0.512262	0.110036	0.00348402	Or51v14	0.0726799
375	1498	E9PZF7	SCN KI_vs_WT	-0.106429	0.222107	0.640425	Slc25a53	0.942335
376	1502	E9PZJ8	SCN KI_vs_WT	-0.0687917	0.0753	0.378845	Ascc3	0.818889
377	1506	E9PZM4	SCN KI_vs_WT	-0.0438574	0.0704	0.544695	Chd2	0.894686
378	1510	E9PZM4;P40201	SCN KI_vs_WT	0.305368	0.275732	0.289791	NA	0.758532
379	1514	E9PZM7	SCN KI_vs_WT	0.122236	0.0844	0.173059	Scaf11	0.641989
380	1518	E9PZP8	SCN KI_vs_WT	-0.00284167	0.0741	0.970035	Herc1	1
381	1522	E9Q0B6	SCN KI_vs_WT	0.0634882	0.181402	0.738308	Dnah6	0.989648
382	1526	E9Q0S6	SCN KI_vs_WT	0.00284837	0.0655	0.966044	Tns1	1
383	1530	E9Q137	SCN KI_vs_WT	0.122438	0.0707	0.108812	Tex264	0.546041
384	1534	E9Q1M1	SCN KI_vs_WT	NA	NA	NA	Pdzd2	NA
385	1538	E9Q1P8	SCN KI_vs_WT	-0.0516281	0.079	0.525655	Irf2bp2	0.886638
386	1542	E9Q236	SCN KI_vs_WT	-0.00359102	0.0629	0.955397	Abcc4	1
387	1546	E9Q238	SCN KI_vs_WT	-0.308625	0.24407	0.252949	Kank1	0.730119
388	1550	E9Q271	SCN KI_vs_WT	-0.142247	0.0647	0.0481179	NA	0.371259
389	1554	E9Q2E4	SCN KI_vs_WT	-0.0177627	0.0313	0.581057	Hectd4	0.911248
390	1558	E9Q2Y0	SCN KI_vs_WT	-0.224232	0.232364	0.37181	Eid2b	0.814932
391	1562	E9Q3A7	SCN KI_vs_WT	-0.16117	0.204107	0.445065	Cdh19	0.848035
392	1566	E9Q3C1	SCN KI_vs_WT	-0.0571049	0.183216	0.760631	C2cd2	1
393	1570	E9Q3G8	SCN KI_vs_WT	0.0542993	0.0627	0.4034	Nup153	0.83128
394	1574	E9Q3L2	SCN KI_vs_WT	-0.0395925	0.0463	0.409333	Pi4ka	0.83478
395	1578	E9Q3M9	SCN KI_vs_WT	-0.066732	0.13232	0.623166	Cracdl	0.932777
396	1582	E9Q3P4	SCN KI_vs_WT	NA	NA	NA	Cenpf	NA
397	1586	E9Q401	SCN KI_vs_WT	-0.0207148	0.0432	0.639997	Ryr2	0.942014
398	1590	E9Q411	SCN KI_vs_WT	-0.00622687	0.0483	0.899658	Nbas	1
399	1594	E9Q4F2	SCN KI_vs_WT	NA	NA	NA	Klhl18	NA
400	1598	E9Q4N7	SCN KI_vs_WT	-0.00104249	0.0838	0.990279	Arid1b	1
401	1602	E9Q4P1	SCN KI_vs_WT	0.818913	0.249228	0.00650982	Wdfy1	0.111855
402	1606	E9Q4S1	SCN KI_vs_WT	-0.0482243	0.0942	0.618162	NA	0.930191
403	1610	E9Q4X2	SCN KI_vs_WT	-0.0818315	0.0553	0.189718	Uggt2	0.662927
404	1614	E9Q4Z2	SCN KI_vs_WT	-0.0274478	0.0741	0.723796	Acacb	0.981954
405	1618	E9Q512	SCN KI_vs_WT	-0.0452011	0.0581	0.451468	Trip11	0.8525
406	1622	E9Q555	SCN KI_vs_WT	-0.12318	0.183324	0.514361	NA	0.882367
407	1626	E9Q5C9	SCN KI_vs_WT	0.0823774	0.107389	0.457854	Nolc1	0.856025
408	1630	E9Q5F9	SCN KI_vs_WT	0.0840889	0.132665	0.538077	Setd2	0.891512
409	1634	E9Q5K9	SCN KI_vs_WT	0.158019	0.0851	0.0880764	Ythdc1	0.498803
410	1638	E9Q5M4	SCN KI_vs_WT	0.00679481	0.0725	0.926869	Zfr2	1
411	1642	E9Q612	SCN KI_vs_WT	0.0921866	0.119071	0.453787	Ptpro	0.854168
412	1646	E9Q616	SCN KI_vs_WT	-0.0690131	0.165547	0.684128	Ahnak	0.961869
413	1650	E9Q634	SCN KI_vs_WT	0.00926692	0.131518	0.944987	Myo1e	1
414	1654	E9Q634;P70248	SCN KI_vs_WT	-0.110764	0.107842	0.324632	NA	0.78518
415	1658	E9Q6B2	SCN KI_vs_WT	0.113322	0.0837	0.200891	Ccdc85c	0.675195
416	1662	E9Q6C8	SCN KI_vs_WT	-0.00822192	0.0626	0.899741	Xkr6	1
417	1666	E9Q6D6	SCN KI_vs_WT	-0.270285	0.164249	0.125771	Zfp277	0.575561
418	1670	E9Q6H8	SCN KI_vs_WT	0.032844	0.0579	0.580791	Plekha5	0.911111
419	1674	E9Q6J5	SCN KI_vs_WT	-0.00597841	0.0882	0.947064	Bod1l	1
420	1678	E9Q6P5	SCN KI_vs_WT	-0.0387504	0.0495	0.449134	Ttc7b	0.851131
421	1682	E9Q6R7	SCN KI_vs_WT	-0.100258	0.0492	0.06435	Utrn	0.429559
422	1686	E9Q6Y8	SCN KI_vs_WT	-0.00168062	0.0653	0.979887	Usp31	1
423	1690	E9Q735	SCN KI_vs_WT	-0.0484192	0.0737	0.523847	Ube4a	0.885802
424	1694	E9Q743	SCN KI_vs_WT	-0.00433727	0.144413	0.977014	NA	1
425	1698	E9Q777	SCN KI_vs_WT	-0.0675514	0.103313	0.525538	Akap11	0.886575
426	1702	E9Q784	SCN KI_vs_WT	0.192382	0.109385	0.104068	Zc3h13	0.535594
427	1706	E9Q7E2	SCN KI_vs_WT	0.0608339	0.0889	0.50702	Arid2	0.878361
428	1710	E9Q7G0	SCN KI_vs_WT	0.00937335	0.0572	0.872514	Numa1	1
429	1714	E9Q7L1	SCN KI_vs_WT	-0.0473374	0.0965	0.641323	Urb2	0.942742
430	1718	E9Q7M2	SCN KI_vs_WT	0.0279741	0.152719	0.85772	Tsc22d2	1
431	1722	E9Q7P2	SCN KI_vs_WT	-0.342668	0.131314	0.0228219	Cacna1i	0.247159
432	1726	E9Q7P2;O88427	SCN KI_vs_WT	0.0733674	0.188503	0.710558	NA	0.975671
433	1730	E9Q7T7	SCN KI_vs_WT	0.0963158	0.0987	0.3483	Chadl	0.799373
434	1734	E9Q7X7	SCN KI_vs_WT	-0.0353582	0.0514	0.504343	NA	0.876894
435	1738	E9Q842	SCN KI_vs_WT	-0.0125615	0.405014	0.975767	NA	1
436	1742	E9Q8D0	SCN KI_vs_WT	0.055386	0.180134	0.763755	Dnajc21	1
437	1746	E9Q8I7	SCN KI_vs_WT	0.187758	0.0786	0.0341272	Nfxl1	0.310899
438	1750	E9Q8I9	SCN KI_vs_WT	-0.066988	0.0537	0.23629	Fry	0.713906
439	1754	E9Q8M1	SCN KI_vs_WT	0.0420993	0.314652	0.897939	Zfp358	1
440	1758	E9Q8Q6	SCN KI_vs_WT	-0.0653379	0.0657	0.339607	Ccdc141	0.794772
441	1762	E9Q8V6	SCN KI_vs_WT	-0.0912754	0.0906	0.333845	Dennd4a	0.790298
442	1766	E9Q912	SCN KI_vs_WT	-0.0428998	0.0584	0.476522	Rap1gds1	0.864767
443	1770	E9Q9B3	SCN KI_vs_WT	-0.116397	0.10476	0.288301	Spryd3	0.758522
444	1774	E9Q9B7	SCN KI_vs_WT	0.00144252	0.0674	0.983267	Kidins220	1
445	1778	E9Q9D5	SCN KI_vs_WT	-0.061095	0.138033	0.66592	Rabl2	0.954345
446	1782	E9Q9D8	SCN KI_vs_WT	0.638091	0.431449	0.189638	Ankrd35	0.662889
447	1786	E9Q9K8	SCN KI_vs_WT	-0.0350834	0.0671	0.61084	Akap6	0.926371
448	1790	E9Q9Q2	SCN KI_vs_WT	0.150622	0.088	0.112825	R3hdm1	0.554689
449	1794	E9Q9Q6	SCN KI_vs_WT	-0.110185	0.0857	0.223044	Cdh18	0.69868
450	1798	E9Q9R9	SCN KI_vs_WT	0.00926597	0.140792	0.94861	Dlg5	1
451	1802	E9Q9T0	SCN KI_vs_WT	0.0130638	0.0872	0.883333	Fbrsl1	1
452	1806	E9QA15	SCN KI_vs_WT	-0.0261083	0.136311	0.851309	NA	1
453	1810	E9QAA1	SCN KI_vs_WT	-0.09391	0.117361	0.439159	Zfp758	0.846598
454	1814	E9QAE3	SCN KI_vs_WT	-0.206304	0.130844	0.140843	Btaf1	0.595085
455	1818	E9QAP7	SCN KI_vs_WT	0.0404551	0.149591	0.795885	Taf4	1
456	1822	E9QAP7;G5E8Z2	SCN KI_vs_WT	-0.0772208	0.144214	0.611588	NA	0.927063
457	1826	E9QAT4	SCN KI_vs_WT	-0.00574182	0.031	0.855955	Sec16a	1
458	1830	F2Z3U3	SCN KI_vs_WT	-0.0585954	0.064	0.378271	Raph1	0.818608
459	1834	F6QRE9	SCN KI_vs_WT	0.146869	0.156921	0.385425	NA	0.821388
460	1838	F6SEU4	SCN KI_vs_WT	-0.0289526	0.0481	0.558474	Syngap1	0.901001
461	1842	F6TQW2;P01864	SCN KI_vs_WT	0.509868	0.35371	0.175031	NA	0.644483
462	1846	F6TQW2;P01864;P01863;P01865	SCN KI_vs_WT	0.517051	0.252388	0.0630232	NA	0.426176
463	1850	F6UK53	SCN KI_vs_WT	0.0904189	0.0843	0.324665	Tex16	0.78518
464	1854	F6UUZ3	SCN KI_vs_WT	-0.0586877	0.500538	0.908602	NA	1
465	1858	F6UZS4	SCN KI_vs_WT	-1.3401	1.45489	0.392526	NA	0.825094
466	1862	F6V035	SCN KI_vs_WT	0.0218225	0.0744	0.774242	Ccdc149	1
467	1866	F6W8I0	SCN KI_vs_WT	-0.397991	0.163821	0.0317656	NA	0.299516
468	1870	F6XLV1	SCN KI_vs_WT	0.114257	0.166378	0.505307	Crocc2	0.877448
469	1874	F6ZDS4	SCN KI_vs_WT	0.00413681	0.032	0.899304	Tpr	1
470	1878	F6ZE64	SCN KI_vs_WT	-0.0568147	0.0708	0.437728	NA	0.846211
471	1882	F7BAB2	SCN KI_vs_WT	-0.0411448	0.0732	0.584188	Tmem132b	0.913125
472	1886	F7BJB9	SCN KI_vs_WT	-0.211559	0.0875	0.0520084	Morc3	0.38542
473	1890	F7BWT7	SCN KI_vs_WT	-0.0575458	0.189212	0.766235	Tspan15	1
474	1894	F8VPK0	SCN KI_vs_WT	-0.0161934	0.0468	0.735428	Skic3	0.988378
475	1898	F8VPK8	SCN KI_vs_WT	-0.0612263	0.0489	0.23418	Pcdh9	0.711309
476	1902	F8VPN4	SCN KI_vs_WT	-0.02937	0.0642	0.655276	Agl	0.94855
477	1906	F8VPP8	SCN KI_vs_WT	-0.00113315	0.0458	0.980673	Zc3h7b	1
478	1910	F8VPU2	SCN KI_vs_WT	-0.11979	0.0501	0.0341214	Farp1	0.310899
479	1914	F8VPZ3	SCN KI_vs_WT	-0.000774713	0.0522	0.988404	Usp32	1
480	1918	F8VQ05	SCN KI_vs_WT	-0.0590246	0.0607	0.350405	Fryl	0.801127
481	1922	F8VQB6	SCN KI_vs_WT	-0.0597828	0.149955	0.703937	Myo10	0.972387
482	1926	F8VQC1	SCN KI_vs_WT	0.0440751	0.0406	0.299415	Srp72	0.766415
483	1930	F8VQG7	SCN KI_vs_WT	-0.104335	0.150794	0.514865	N4bp2	0.882603
484	1934	F8VQK3	SCN KI_vs_WT	-0.079749	0.066	0.249883	Gucy1a2	0.72726
485	1938	G3UW40	SCN KI_vs_WT	-0.0535126	0.130456	0.68889	Mcc	0.96441
486	1942	G3UW55	SCN KI_vs_WT	-0.0674124	0.287389	0.818498	Lbhd2	1
487	1946	G3UW60	SCN KI_vs_WT	-0.116466	0.297938	0.702718	Susd5	0.971776
488	1950	G3UYQ4	SCN KI_vs_WT	-0.0995402	0.257912	0.71285	NA	0.976892
489	1954	G3X8Q1	SCN KI_vs_WT	NA	NA	NA	Cabin1	NA
490	1958	G3X8U3	SCN KI_vs_WT	0.0200833	0.0889	0.825076	Qng1	1
491	1962	G3X8X0	SCN KI_vs_WT	0.219429	0.162015	0.200571	Dhx16	0.675152
492	1966	G3X972	SCN KI_vs_WT	0.0114534	0.0636	0.860197	Sec24c	1
493	1970	G3X9B1	SCN KI_vs_WT	-0.0936257	0.0942	0.340012	Heatr1	0.795098
494	1974	G3X9I7	SCN KI_vs_WT	NA	NA	NA	Zc3h12b	NA
495	1978	G3X9J0	SCN KI_vs_WT	0.0304319	0.054	0.583345	Sipa1l3	0.912805
496	1982	G3X9K3	SCN KI_vs_WT	-0.0497202	0.0655	0.462129	Arfgef1	0.858218
497	1986	G3X9N3	SCN KI_vs_WT	0.0304237	0.0865	0.731206	Pnma8b	0.986347
498	1990	G3X9X1	SCN KI_vs_WT	-0.0697927	0.0762	0.377865	Kbtbd2	0.818597
499	1994	G3X9Z4	SCN KI_vs_WT	0.0196292	0.264552	0.942076	Pcf11	1
500	1998	G3XA20	SCN KI_vs_WT	-0.109917	0.132871	0.42424	Grip2	0.840009
501	2002	G3XA30	SCN KI_vs_WT	0.135625	0.120739	0.304243	Nsmce4a	0.770447
502	2006	G3XA57	SCN KI_vs_WT	-0.00240082	0.0323	0.942025	Rab11fip2	1
503	2010	G5E829	SCN KI_vs_WT	-0.0970689	0.0536	0.0955031	Atp2b1	0.516702
504	2014	G5E870	SCN KI_vs_WT	0.00057898	0.0517	0.991242	Trip12	1
505	2018	G5E895	SCN KI_vs_WT	0.0299635	0.087	0.736576	Akr1b10	0.988868
506	2022	G5E895;P21300	SCN KI_vs_WT	0.080238	0.0803	0.337688	NA	0.79344
507	2026	G5E897	SCN KI_vs_WT	-0.22118	0.128032	0.109695	Poglut3	0.548357
508	2030	G5E8B9	SCN KI_vs_WT	-0.0240029	0.129438	0.855982	Zbtb11	1
509	2034	G5E8C2	SCN KI_vs_WT	-0.00590673	0.0737	0.938758	Kbtbd7	1
510	2038	G5E8C2;E9PYD7	SCN KI_vs_WT	0.0581561	0.159713	0.72825	NA	0.984787
511	2042	G5E8F4	SCN KI_vs_WT	0.0912798	0.217507	0.689343	Fpgt	0.964577
512	2046	G5E8G3	SCN KI_vs_WT	-0.00532887	0.12552	0.966835	Opcml	1
513	2050	G5E8K5	SCN KI_vs_WT	-0.0408108	0.0833	0.633118	Ank3	0.938282
514	2054	G5E8P0	SCN KI_vs_WT	-0.0153883	0.079	0.848906	Tubgcp6	1
515	2058	G5E8P1	SCN KI_vs_WT	0.0524799	0.102953	0.619473	Brd1	0.930785
516	2062	G5E8V9	SCN KI_vs_WT	-0.051808	0.0727	0.489452	Arfip1	0.869874
517	2066	G5E905	SCN KI_vs_WT	-0.0357777	0.309163	0.911647	Zfp871	1
518	2070	H3BJZ2	SCN KI_vs_WT	-0.048965	0.159628	0.769405	NA	1
519	2074	H3BKQ3	SCN KI_vs_WT	0.00775685	0.0564	0.892834	Evi5l	1
520	2078	J3QK46	SCN KI_vs_WT	-0.017295	0.227243	0.940587	Tmem200c	1
521	2082	J3QMC5	SCN KI_vs_WT	-0.0579311	0.0945	0.551452	Mdn1	0.89695
522	2086	L7N264	SCN KI_vs_WT	0.281596	0.159555	0.128027	NA	0.578921
523	2090	L7N264;Q9EP96;Q99J94	SCN KI_vs_WT	0.289635	0.232999	0.239683	NA	0.718523
524	2094	L7N466	SCN KI_vs_WT	NA	NA	NA	Mthfsl	NA
525	2098	M0QWN7	SCN KI_vs_WT	-0.00470161	0.174336	0.978928	Usp35	1
526	2102	O08528	SCN KI_vs_WT	0.137835	0.0983	0.186117	Hk2	0.660495
527	2106	O08529	SCN KI_vs_WT	-0.00935358	0.0404	0.820614	Capn2	1
528	2110	O08530	SCN KI_vs_WT	-0.171918	0.103274	0.121851	S1pr1	0.568659
529	2114	O08532	SCN KI_vs_WT	-0.0136194	0.0668	0.841818	Cacna2d1	1
530	2118	O08539	SCN KI_vs_WT	0.00736377	0.0685	0.916175	Bin1	1
531	2122	O08543	SCN KI_vs_WT	NA	NA	NA	Efna5	NA
532	2126	O08547	SCN KI_vs_WT	0.0106403	0.132097	0.937128	Sec22b	1
533	2130	O08553	SCN KI_vs_WT	-0.0360437	0.0548	0.523092	Dpysl2	0.885802
534	2134	O08573	SCN KI_vs_WT	0.0870902	0.118931	0.478062	Lgals9	0.865692
535	2138	O08576	SCN KI_vs_WT	-0.0739208	0.0783	0.363691	Rundc3a	0.810159
536	2142	O08579	SCN KI_vs_WT	0.0201614	0.0705	0.77984	Emd	1
537	2146	O08581	SCN KI_vs_WT	NA	NA	NA	Kcnk1	NA
538	2150	O08582	SCN KI_vs_WT	-0.0236597	0.0517	0.655218	Gtpbp1	0.94855
539	2154	O08583	SCN KI_vs_WT	-0.0630077	0.108185	0.571074	Alyref	0.907583
540	2158	O08585	SCN KI_vs_WT	0.0686644	0.12909	0.604497	NA	0.922795
541	2162	O08586	SCN KI_vs_WT	0.0102388	0.0562	0.858498	Pten	1
542	2166	O08599	SCN KI_vs_WT	-0.00242443	0.0498	0.961997	Stxbp1	1
543	2170	O08600	SCN KI_vs_WT	0.0542013	0.076	0.489516	Endog	0.869874
544	2174	O08601	SCN KI_vs_WT	0.0474714	0.105006	0.659271	Mttp	0.950735
545	2178	O08605	SCN KI_vs_WT	-0.0520669	0.134499	0.705448	Mknk1	0.973013
546	2182	O08638	SCN KI_vs_WT	-0.136887	0.222764	0.550363	NA	0.896616
547	2186	O08641	SCN KI_vs_WT	NA	NA	NA	Sh3yl1	NA
548	2190	O08644	SCN KI_vs_WT	0.000491101	0.101787	0.99623	Ephb6	1
549	2194	O08648	SCN KI_vs_WT	-0.0592609	0.0359	0.124433	Map3k4	0.573322
550	2198	O08663	SCN KI_vs_WT	-0.0357609	0.0682	0.609517	Metap2	0.925369
551	2202	O08672	SCN KI_vs_WT	-0.121696	0.0723	0.118001	NA	0.561502
552	2206	O08677	SCN KI_vs_WT	0.175495	0.175154	0.336144	Kng1	0.792055
553	2210	O08677;CON__P01045-1;CON__Q2KJ62;CON__P01044-1	SCN KI_vs_WT	0.175213	0.259479	0.512319	NA	0.881241
554	2214	O08688	SCN KI_vs_WT	0.0136338	0.0416	0.748805	Capn5	0.994936
555	2218	O08709	SCN KI_vs_WT	-0.0538543	0.0395	0.197383	Prdx6	0.672062
556	2222	O08715	SCN KI_vs_WT	-0.0374811	0.0541	0.501812	Akap1	0.876091
557	2226	O08734	SCN KI_vs_WT	-0.0641046	0.171809	0.72189	Bak1	0.981199
558	2230	O08738	SCN KI_vs_WT	-0.0738965	0.107744	0.505839	Casp6	0.87771
559	2234	O08739	SCN KI_vs_WT	0.0276728	0.0536	0.615178	Ampd3	0.928633
560	2238	O08739;Q3V1D3	SCN KI_vs_WT	0.127783	0.183511	0.499491	NA	0.875208
561	2242	O08740	SCN KI_vs_WT	0.0198625	0.302968	0.948808	NA	1
562	2246	O08747	SCN KI_vs_WT	0.0343812	0.0689	0.626789	Unc5c	0.934967
563	2250	O08749	SCN KI_vs_WT	0.0953603	0.066	0.174106	Dld	0.643124
564	2254	O08756	SCN KI_vs_WT	0.0188769	0.0456	0.68622	NA	0.962937
565	2258	O08759	SCN KI_vs_WT	0.0145199	0.0338	0.675312	Ube3a	0.958358
566	2262	O08784	SCN KI_vs_WT	0.0351822	0.0943	0.715662	Tcof1	0.978368
567	2266	O08785	SCN KI_vs_WT	-0.0230078	0.138192	0.873239	Clock	1
568	2270	O08785;P97460	SCN KI_vs_WT	-0.183104	0.132705	0.192821	NA	0.666078
569	2274	O08788	SCN KI_vs_WT	-0.0144321	0.0283	0.618883	Dctn1	0.93064
570	2278	O08795	SCN KI_vs_WT	-0.0164304	0.106826	0.88032	Prkcsh	1
571	2282	O08796	SCN KI_vs_WT	0.016351	0.1265	0.899296	Eef2k	1
572	2286	O08797	SCN KI_vs_WT	-0.0837754	0.110224	0.461899	Serpinb9	0.858134
573	2290	O08797;Q8VHQ1;Q80UK5;O08806;F6V5V4	SCN KI_vs_WT	0.0172739	0.0924	0.854872	NA	1
574	2294	O08800	SCN KI_vs_WT	NA	NA	NA	Serpinb8	NA
575	2298	O08804	SCN KI_vs_WT	0.00196223	0.182658	0.991605	Serpinb6b	1
576	2302	O08804;I7HJI3	SCN KI_vs_WT	0.113976	0.161947	0.507944	NA	0.879004
577	2306	O08807	SCN KI_vs_WT	-0.0293627	0.103415	0.781303	Prdx4	1
578	2310	O08808	SCN KI_vs_WT	-0.0043876	0.0569	0.939794	Diaph1	1
579	2314	O08810	SCN KI_vs_WT	-0.041043	0.0758	0.598248	Eftud2	0.919622
580	2318	O08811	SCN KI_vs_WT	0.0769845	0.0871	0.394019	Ercc2	0.826245
581	2322	O08842	SCN KI_vs_WT	0.0355079	0.0832	0.677039	Gfra2	0.958804
582	2326	O08848	SCN KI_vs_WT	-0.106834	0.0373	0.0141476	Ro60	0.183484
583	2330	O08856	SCN KI_vs_WT	0.0594466	0.100497	0.575761	Ell	0.909711
584	2334	O08908	SCN KI_vs_WT	-0.0123454	0.0736	0.869648	Pik3r2	1
585	2338	O08912	SCN KI_vs_WT	0.0736496	0.130823	0.58382	Galnt1	0.912943
586	2342	O08914	SCN KI_vs_WT	-0.0613376	0.0969	0.538705	Faah	0.891626
587	2346	O08915	SCN KI_vs_WT	0.135175	0.0723	0.0859566	Aip	0.49331
588	2350	O08917	SCN KI_vs_WT	0.0106019	0.0983	0.915909	Flot1	1
589	2354	O08919	SCN KI_vs_WT	0.00237858	0.0849	0.978099	Numbl	1
590	2358	O08967	SCN KI_vs_WT	-0.111864	0.0738	0.155708	Cyth3	0.617925
591	2362	O08989	SCN KI_vs_WT	-0.0110148	0.0678	0.873613	Mras	1
592	2366	O08992	SCN KI_vs_WT	-0.117553	0.092	0.225299	Sdcbp	0.701505
593	2370	O08997	SCN KI_vs_WT	-0.0523356	0.0864	0.555941	Atox1	0.899838
594	2374	O09005	SCN KI_vs_WT	0.169334	0.191137	0.393064	Degs1	0.825558
595	2378	O09012	SCN KI_vs_WT	-0.124585	0.0806	0.148221	Pex5	0.606909
596	2382	O09044	SCN KI_vs_WT	-0.148786	0.154468	0.354448	Snap23	0.804313
597	2386	O09061	SCN KI_vs_WT	-0.0844472	0.0972	0.40217	Psmb1	0.830596
598	2390	O09106	SCN KI_vs_WT	-0.0834429	0.0637	0.214564	Hdac1	0.689831
599	2394	O09111	SCN KI_vs_WT	-0.0517977	0.0854	0.555259	Ndufb11	0.899308
600	2398	O09113	SCN KI_vs_WT	0.147633	0.232292	0.537003	Otp	0.891273
601	2402	O09114	SCN KI_vs_WT	-0.116152	0.162516	0.488459	Ptgds	0.869676
602	2406	O09117	SCN KI_vs_WT	-0.0619935	0.216218	0.779219	Sypl1	1
603	2410	O09118	SCN KI_vs_WT	0.152145	0.0552	0.0330736	Ntn1	0.305439
604	2414	O09126	SCN KI_vs_WT	0.0271392	0.0622	0.670422	Sema4d	0.956336
605	2418	O09131	SCN KI_vs_WT	-0.0255126	0.0542	0.646121	Gsto1	0.945009
606	2422	O09131;Q8K2Q2	SCN KI_vs_WT	-0.0441028	0.174101	0.80431	NA	1
607	2426	O09159	SCN KI_vs_WT	-0.120343	0.0729	0.124545	Man2b1	0.573512
608	2430	O09164	SCN KI_vs_WT	0.260696	0.148107	0.103816	Sod3	0.534892
609	2434	O09167	SCN KI_vs_WT	-0.0463521	0.111216	0.6842	NA	0.96187
610	2438	O09172	SCN KI_vs_WT	0.108037	0.0468	0.0397026	Gclm	0.336954
611	2442	O09174	SCN KI_vs_WT	-0.0266427	0.117442	0.824352	Amacr	1
612	2446	O35066	SCN KI_vs_WT	0.0701565	0.062	0.279932	Kif3c	0.754194
613	2450	O35071	SCN KI_vs_WT	0.041699	0.148829	0.78411	Kif1c	1
614	2454	O35074	SCN KI_vs_WT	-0.111706	0.223697	0.626552	Ptgis	0.934887
615	2458	O35075	SCN KI_vs_WT	-0.100393	0.0995	0.33304	Vps26c	0.78974
616	2462	O35083	SCN KI_vs_WT	-0.019175	0.0865	0.82838	Agpat1	1
617	2466	O35098	SCN KI_vs_WT	-0.0536704	0.0693	0.453693	NA	0.854151
618	2470	O35099	SCN KI_vs_WT	-0.0462712	0.0647	0.488419	Map3k5	0.869676
619	2474	O35114	SCN KI_vs_WT	-0.0264338	0.116062	0.823671	Scarb2	1
620	2478	O35125	SCN KI_vs_WT	0.0169736	0.19336	0.932906	Lrrc23	1
621	2482	O35126	SCN KI_vs_WT	0.24704	0.148851	0.122871	Atn1	0.571335
622	2486	O35127	SCN KI_vs_WT	-0.12929	0.0859	0.158166	Grcc10	0.620754
623	2490	O35129	SCN KI_vs_WT	0.0409588	0.0717	0.578114	Phb2	0.91044
624	2494	O35130	SCN KI_vs_WT	-0.0580939	0.116445	0.635612	Emg1	0.939638
625	2498	O35136	SCN KI_vs_WT	0.0188729	0.100643	0.854384	Ncam2	1
626	2502	O35136;Q99MW1	SCN KI_vs_WT	-0.00548999	0.37949	0.988695	NA	1
627	2506	O35143	SCN KI_vs_WT	0.359261	0.414633	0.403233	Atp5if1	0.831267
628	2510	O35144	SCN KI_vs_WT	-0.00613137	0.0811	0.941016	Terf2	1
629	2514	O35153	SCN KI_vs_WT	-0.119283	0.135305	0.395316	Bet1l	0.82702
630	2518	O35166	SCN KI_vs_WT	0.26372	0.141838	0.0876661	Gosr2	0.49782
631	2522	O35176	SCN KI_vs_WT	1.28278	0.655873	0.0741688	Scgb1b2	0.462755
632	2526	O35181	SCN KI_vs_WT	-0.184159	0.194186	0.361653	Nrg3	0.809086
633	2530	O35188	SCN KI_vs_WT	-0.0516515	0.160215	0.752705	Cx3cl1	0.996827
634	2534	O35206	SCN KI_vs_WT	-0.108621	0.178419	0.554011	Col15a1	0.89849
635	2538	O35215	SCN KI_vs_WT	0.174969	0.0776	0.0436304	Ddt	0.352504
636	2542	O35218	SCN KI_vs_WT	0.0115932	0.072	0.874802	Cpsf2	1
637	2546	O35219	SCN KI_vs_WT	0.0389376	0.127209	0.76478	Kcnh2	1
638	2550	O35226	SCN KI_vs_WT	-0.158381	0.0854	0.0884551	Psmd4	0.499477
639	2554	O35231	SCN KI_vs_WT	0.210292	0.233284	0.385089	Kifc3	0.821388
640	2558	O35239	SCN KI_vs_WT	-0.0441162	0.062	0.49038	Ptpn9	0.870538
641	2562	O35245	SCN KI_vs_WT	-0.0739985	0.216032	0.737873	Pkd2	0.989349
642	2566	O35250	SCN KI_vs_WT	0.0154543	0.0596	0.79992	Exoc7	1
643	2570	O35286	SCN KI_vs_WT	-0.0191474	0.0486	0.700481	Dhx15	0.970642
644	2574	O35295	SCN KI_vs_WT	-0.00191812	0.106635	0.985944	Purb	1
645	2578	O35304	SCN KI_vs_WT	-0.00853613	0.0818	0.918611	NA	1
646	2582	O35309	SCN KI_vs_WT	0.125034	0.1039	0.274139	Nmi	0.750383
647	2586	O35316	SCN KI_vs_WT	0.00942388	0.154344	0.952318	Slc6a6	1
648	2590	O35317	SCN KI_vs_WT	-0.0665075	0.0703	0.380622	Pbx3	0.819838
649	2594	O35326	SCN KI_vs_WT	0.0516606	0.0589	0.397763	Srsf5	0.828231
650	2598	O35343	SCN KI_vs_WT	0.173768	0.0644	0.0194369	Kpna4	0.224046
651	2602	O35344	SCN KI_vs_WT	-0.127034	0.118904	0.306374	Kpna3	0.772278
652	2606	O35345	SCN KI_vs_WT	-0.191712	0.0676	0.0150436	Kpna6	0.190556
653	2610	O35350	SCN KI_vs_WT	-0.0284955	0.0539	0.606785	Capn1	0.923741
654	2614	O35375	SCN KI_vs_WT	-0.0153265	0.23408	0.948874	Nrp2	1
655	2618	O35379	SCN KI_vs_WT	-0.149511	0.115569	0.220116	Abcc1	0.696617
656	2622	O35381	SCN KI_vs_WT	-0.0439028	0.306118	0.88834	Anp32a	1
657	2626	O35381;Q64G17	SCN KI_vs_WT	-0.0303023	0.32895	0.928124	NA	1
658	2630	O35382	SCN KI_vs_WT	0.0468909	0.0395	0.258292	Exoc4	0.735215
659	2634	O35386	SCN KI_vs_WT	-0.0179965	0.0792	0.824068	Phyh	1
660	2638	O35387	SCN KI_vs_WT	0.068974	0.0495	0.188543	Hax1	0.662091
661	2642	O35393	SCN KI_vs_WT	0.0616639	0.0822	0.467435	Efnb3	0.861176
662	2646	O35405	SCN KI_vs_WT	-0.177257	0.0694	0.025205	Pld3	0.26217
663	2650	O35409	SCN KI_vs_WT	-0.0982016	0.0534	0.0908388	Folh1	0.50582
664	2654	O35409;Q9CZR2	SCN KI_vs_WT	-0.172993	0.454753	0.710289	NA	0.97545
665	2658	O35417	SCN KI_vs_WT	0.0725714	0.143211	0.621516	NA	0.931887
666	2662	O35425	SCN KI_vs_WT	NA	NA	NA	Bok	NA
667	2666	O35427	SCN KI_vs_WT	-0.111558	0.156908	0.503787	Crcp	0.876556
668	2670	O35435	SCN KI_vs_WT	0.0117613	0.0738	0.876075	Dhodh	1
669	2674	O35448	SCN KI_vs_WT	-0.00967715	0.151832	0.951251	Ppt2	1
670	2678	O35449	SCN KI_vs_WT	-0.020596	0.119676	0.866228	Prrt1	1
671	2682	O35450	SCN KI_vs_WT	-0.208552	0.152688	0.197031	Fkbpl	0.671564
672	2686	O35454	SCN KI_vs_WT	-0.0310925	0.0784	0.698473	Clcn6	0.969719
673	2690	O35459	SCN KI_vs_WT	0.000921251	0.0533	0.986495	Ech1	1
674	2694	O35464	SCN KI_vs_WT	-0.010099	0.153142	0.948508	Sema6a	1
675	2698	O35465	SCN KI_vs_WT	0.0252184	0.0552	0.656186	Fkbp8	0.948613
676	2702	O35474	SCN KI_vs_WT	-0.0188538	0.0572	0.747503	Edil3	0.994268
677	2706	O35488	SCN KI_vs_WT	0.0135291	0.0585	0.821103	Slc27a2	1
678	2710	O35492	SCN KI_vs_WT	-0.122688	0.164403	0.483712	Clk3	0.868948
679	2714	O35495	SCN KI_vs_WT	0.0340428	0.0681	0.626265	Cdk14	0.934693
680	2718	O35516	SCN KI_vs_WT	-0.0860243	0.163445	0.608258	Notch2	0.924477
681	2722	O35526	SCN KI_vs_WT	-0.0512464	0.0901	0.580074	Stx1a	0.910831
682	2726	O35551	SCN KI_vs_WT	-0.0216095	0.0307	0.494869	Rabep1	0.873154
683	2730	O35566	SCN KI_vs_WT	0.355621	0.324167	0.294156	Cd151	0.7625
684	2734	O35593	SCN KI_vs_WT	0.0260577	0.0423	0.549711	Psmd14	0.896531
685	2738	O35594	SCN KI_vs_WT	0.064002	0.0736	0.401611	Ift81	0.830528
686	2742	O35598	SCN KI_vs_WT	-0.0585371	0.101184	0.573611	Adam10	0.908687
687	2746	O35604	SCN KI_vs_WT	-0.0919709	0.122407	0.466919	Npc1	0.860859
688	2750	O35607	SCN KI_vs_WT	0.0769227	0.067	0.273494	Bmpr2	0.749926
689	2754	O35609	SCN KI_vs_WT	0.0519413	0.0562	0.373204	Scamp3	0.815495
690	2758	O35613	SCN KI_vs_WT	-0.52586	0.252755	0.0826764	Daxx	0.484703
691	2762	O35621	SCN KI_vs_WT	0.16533	0.0784	0.05674	Pmm1	0.402363
692	2766	O35623	SCN KI_vs_WT	0.0848998	0.110171	0.455836	Bet1	0.85514
693	2770	O35625	SCN KI_vs_WT	-0.170467	0.180843	0.364465	Axin1	0.810528
694	2774	O35633	SCN KI_vs_WT	-0.059732	0.0616	0.351532	Slc32a1	0.802364
695	2778	O35638	SCN KI_vs_WT	-0.0339479	0.0666	0.619403	Stag2	0.930785
696	2782	O35639	SCN KI_vs_WT	0.0517547	0.0723	0.487686	Anxa3	0.869399
697	2786	O35640	SCN KI_vs_WT	0.212666	0.181241	0.285107	Anxa8	0.757444
698	2790	O35643	SCN KI_vs_WT	-0.0428515	0.0553	0.453592	Ap1b1	0.854072
699	2794	O35648	SCN KI_vs_WT	-0.00748964	0.225622	0.974064	Cetn3	1
700	2798	O35654	SCN KI_vs_WT	-0.0278329	0.126418	0.829443	Pold2	1
701	2802	O35657	SCN KI_vs_WT	0.0446743	0.113116	0.699815	Neu1	0.970515
702	2806	O35658	SCN KI_vs_WT	-0.132795	0.0845	0.141893	NA	0.596798
703	2810	O35660	SCN KI_vs_WT	-0.0151065	0.0566	0.798565	Gstm6	1
704	2814	O35668	SCN KI_vs_WT	0.0307259	0.154518	0.84571	Hap1	1
705	2818	O35671	SCN KI_vs_WT	-0.0373475	0.140249	0.794533	Itgb1bp1	1
706	2822	O35678	SCN KI_vs_WT	0.0127965	0.110567	0.909776	Mgll	1
707	2826	O35680	SCN KI_vs_WT	0.148965	0.0833	0.0989581	Mrps12	0.523552
708	2830	O35681	SCN KI_vs_WT	-0.0426532	0.0591	0.484632	Syt3	0.869065
709	2834	O35682	SCN KI_vs_WT	-0.225261	0.192892	0.265563	Myadm	0.742404
710	2838	O35683	SCN KI_vs_WT	-0.125525	0.15846	0.443646	Ndufa1	0.847439
711	2842	O35684	SCN KI_vs_WT	-0.0664119	0.0781	0.411748	Serpini1	0.835752
712	2846	O35685	SCN KI_vs_WT	0.0586527	0.103521	0.581442	Nudc	0.9114
713	2850	O35691	SCN KI_vs_WT	0.057051	0.104548	0.595276	Pnn	0.918567
714	2854	O35704	SCN KI_vs_WT	0.0227149	0.143282	0.876674	Sptlc1	1
715	2858	O35709	SCN KI_vs_WT	-0.096281	0.110909	0.402365	Enc1	0.830769
716	2862	O35710	SCN KI_vs_WT	0.0296551	0.0821	0.72418	Noct	0.982062
717	2866	O35711	SCN KI_vs_WT	0.116073	0.0792	0.193263	Ppfibp2	0.666705
718	2870	O35730	SCN KI_vs_WT	-0.0537869	0.0837	0.532699	Ring1	0.889687
719	2874	O35737	SCN KI_vs_WT	0.0366392	0.087	0.681176	Hnrnph1	0.960595
720	2878	O35738	SCN KI_vs_WT	-0.063277	0.391124	0.876788	Klf12	1
721	2882	O35841	SCN KI_vs_WT	-0.0316229	0.059	0.601868	Api5	0.921448
722	2886	O35855	SCN KI_vs_WT	-0.00362097	0.0844	0.966481	Bcat2	1
723	2890	O35857	SCN KI_vs_WT	0.0100607	0.0545	0.856601	Timm44	1
724	2894	O35864	SCN KI_vs_WT	0.0218249	0.056	0.703805	Cops5	0.972245
725	2898	O35874	SCN KI_vs_WT	0.0565709	0.170714	0.746073	Slc1a4	0.993514
726	2902	O35887	SCN KI_vs_WT	-0.00474782	0.180706	0.979471	Calu	1
727	2906	O35892	SCN KI_vs_WT	NA	NA	NA	Sp100	NA
728	2910	O35892;Q99388	SCN KI_vs_WT	-0.0999838	0.208732	0.640545	NA	0.942434
729	2914	O35900	SCN KI_vs_WT	0.0101731	0.347193	0.977106	Lsm2	1
730	2918	O35926	SCN KI_vs_WT	-0.315184	0.142854	0.0475926	Cdk5r2	0.369169
731	2922	O35927	SCN KI_vs_WT	0.00795099	0.0542	0.885836	Ctnnd2	1
732	2926	O35943	SCN KI_vs_WT	0.0241335	0.107446	0.826062	Fxn	1
733	2930	O35945	SCN KI_vs_WT	-0.347498	0.517551	0.514666	Aldh1a7	0.882594
734	2934	O35954	SCN KI_vs_WT	-0.0318002	0.0435	0.478892	Pitpnm1	0.866146
735	2938	O35955	SCN KI_vs_WT	-0.161904	0.12249	0.210887	Psmb10	0.686041
736	2942	O35963	SCN KI_vs_WT	0.000881638	0.0441	0.98439	Rab33b	1
737	2946	O35969	SCN KI_vs_WT	-0.130954	0.127716	0.325423	Gamt	0.785306
738	2950	O35972	SCN KI_vs_WT	-0.178	0.180662	0.343945	Mrpl23	0.796572
739	2954	O35988	SCN KI_vs_WT	-0.0926872	0.151064	0.550958	Sdc4	0.89675
740	2958	O54692	SCN KI_vs_WT	-0.116169	0.0731	0.13792	Zw10	0.591771
741	2962	O54724	SCN KI_vs_WT	-0.146737	0.10942	0.204741	Cavin1	0.679312
742	2966	O54734	SCN KI_vs_WT	-0.102685	0.07	0.16793	Ddost	0.635562
743	2970	O54754	SCN KI_vs_WT	0.168392	0.169302	0.339552	Aox1	0.794772
744	2974	O54774	SCN KI_vs_WT	-0.0582437	0.0737	0.444762	Ap3d1	0.847886
745	2978	O54781	SCN KI_vs_WT	-0.0402804	0.0745	0.598824	Srpk2	0.919943
746	2982	O54782	SCN KI_vs_WT	-0.152256	0.0956	0.137255	Man2b2	0.590661
747	2986	O54784	SCN KI_vs_WT	-0.110961	0.149749	0.472954	Dapk3	0.863543
748	2990	O54784;Q8VDF3	SCN KI_vs_WT	-0.459666	0.191965	0.0536937	NA	0.392375
749	2994	O54785	SCN KI_vs_WT	0.0849506	0.0764	0.287971	Limk2	0.758522
750	2998	O54786	SCN KI_vs_WT	0.0862397	0.0669	0.221855	Dffa	0.697705
751	3002	O54790	SCN KI_vs_WT	0.00745826	0.144333	0.960466	Mafg	1
752	3006	O54790;Q61827;O54791	SCN KI_vs_WT	0.0330317	0.141171	0.818942	NA	1
753	3010	O54798	SCN KI_vs_WT	0.154314	0.146818	0.31394	Brs3	0.778119
754	3014	O54799	SCN KI_vs_WT	-0.0573672	0.115802	0.637943	Nmbr	0.941115
755	3018	O54804	SCN KI_vs_WT	0.0670447	0.103156	0.527981	Chka	0.887143
756	3022	O54818	SCN KI_vs_WT	-0.0214839	0.115332	0.855338	Tpd52l1	1
757	3026	O54824	SCN KI_vs_WT	0.0870548	0.177715	0.633069	Il16	0.938282
758	3030	O54825	SCN KI_vs_WT	-0.0968348	0.14639	0.5208	Bysl	0.885242
759	3034	O54829	SCN KI_vs_WT	-0.0534997	0.0732	0.478838	Rgs7	0.866135
760	3038	O54833	SCN KI_vs_WT	-0.047216	0.0567	0.420912	Csnk2a2	0.838505
761	3042	O54834	SCN KI_vs_WT	-0.0114578	0.202407	0.95579	Arhgap6	1
762	3046	O54836	SCN KI_vs_WT	-0.0407248	0.424176	0.925098	NA	1
763	3050	O54865	SCN KI_vs_WT	-0.0827266	0.0622	0.208081	Gucy1b1	0.682744
764	3054	O54879	SCN KI_vs_WT	-0.01976	0.141778	0.891467	Hmgb3	1
765	3058	O54890	SCN KI_vs_WT	NA	NA	NA	Itgb3	NA
766	3062	O54901	SCN KI_vs_WT	-0.0220857	0.0753	0.774248	NA	1
767	3066	O54916	SCN KI_vs_WT	-0.0206205	0.180605	0.910988	Reps1	1
768	3070	O54929	SCN KI_vs_WT	NA	NA	NA	Wsb2	NA
769	3074	O54931	SCN KI_vs_WT	-0.0320894	0.117899	0.790113	Pakap	1
770	3078	O54941	SCN KI_vs_WT	-0.150405	0.0691	0.050318	Smarce1	0.379616
771	3082	O54942	SCN KI_vs_WT	-0.0546081	0.269721	0.842948	Cldn5	1
772	3086	O54946	SCN KI_vs_WT	-0.0316873	0.123237	0.801439	Dnajb6	1
773	3090	O54946;Q9QYI8	SCN KI_vs_WT	-0.0299804	0.503893	0.953535	NA	1
774	3094	O54949	SCN KI_vs_WT	0.0833539	0.191955	0.671822	Nlk	0.957115
775	3098	O54950	SCN KI_vs_WT	-0.00505818	0.0815	0.951517	Prkag1	1
776	3102	O54950;Q8BGM7	SCN KI_vs_WT	-0.029412	0.134817	0.830969	NA	1
777	3106	O54951	SCN KI_vs_WT	0.0127764	0.113588	0.912302	Sema6b	1
778	3110	O54962	SCN KI_vs_WT	-0.0093316	0.16017	0.9545	Banf1	1
779	3114	O54965	SCN KI_vs_WT	-0.293966	0.297287	0.342266	Rnf13	0.796113
780	3118	O54967	SCN KI_vs_WT	-0.010224	0.0867	0.908036	Tnk2	1
781	3122	O54983	SCN KI_vs_WT	0.0206093	0.263307	0.938902	Crym	1
782	3126	O54984	SCN KI_vs_WT	-0.0491964	0.0575	0.409206	Get3	0.83477
783	3130	O54988	SCN KI_vs_WT	0.0185805	0.10317	0.860083	Slk	1
784	3134	O54990	SCN KI_vs_WT	-0.252928	0.160839	0.141803	Prom1	0.596597
785	3138	O54991	SCN KI_vs_WT	-0.120248	0.0909	0.210518	Cntnap1	0.685685
786	3142	O54992	SCN KI_vs_WT	-0.131946	0.118484	0.287252	Mapkapk5	0.758522
787	3146	O55003	SCN KI_vs_WT	0.014161	0.0555	0.802939	Bnip3	1
788	3150	O55013	SCN KI_vs_WT	-0.010742	0.0683	0.877594	Trappc3	1
789	3154	O55017	SCN KI_vs_WT	-0.0189262	0.0522	0.723342	Cacna1b	0.981833
790	3158	O55022	SCN KI_vs_WT	0.137107	0.108825	0.231661	Pgrmc1	0.708179
791	3162	O55023	SCN KI_vs_WT	0.0334798	0.0389	0.40687	NA	0.833259
792	3166	O55026	SCN KI_vs_WT	0.0514322	0.0854	0.55841	Entpd2	0.900953
793	3170	O55028	SCN KI_vs_WT	0.070238	0.093	0.464564	Bckdk	0.859747
794	3174	O55029	SCN KI_vs_WT	-0.0223098	0.0524	0.677894	Copb2	0.958864
795	3178	O55033	SCN KI_vs_WT	0.0391123	0.0593	0.521734	Nck2	0.885556
796	3182	O55042	SCN KI_vs_WT	-0.256897	0.462508	0.588797	Snca	0.915662
797	3186	O55047	SCN KI_vs_WT	0.00441774	0.0604	0.942898	Tlk2	1
798	3190	O55057	SCN KI_vs_WT	-0.0721822	0.114051	0.538677	Pde6d	0.891626
799	3194	O55060	SCN KI_vs_WT	0.119034	0.0851	0.187104	Tpmt	0.66102
800	3198	O55091	SCN KI_vs_WT	-0.0722608	0.144123	0.625173	Impact	0.934005
801	3202	O55098	SCN KI_vs_WT	-0.179124	0.0934	0.079281	Stk10	0.476011
802	3206	O55100	SCN KI_vs_WT	-0.137696	0.0667	0.0613497	Syngr1	0.418672
803	3210	O55102	SCN KI_vs_WT	0.00705874	0.0577	0.904697	Bloc1s1	1
804	3214	O55106	SCN KI_vs_WT	-0.062597	0.056	0.285422	Strn	0.757447
805	3218	O55125	SCN KI_vs_WT	-0.0299466	0.0567	0.607066	Nipsnap1	0.923841
806	3222	O55126	SCN KI_vs_WT	0.0211566	0.075	0.782697	NA	1
807	3226	O55128	SCN KI_vs_WT	0.0408636	0.120059	0.739468	Sap18	0.989969
808	3230	O55131	SCN KI_vs_WT	0.0239071	0.0567	0.680875	Septin7	0.96054
809	3234	O55135	SCN KI_vs_WT	-0.0207573	0.0604	0.737216	Eif6	0.9892
810	3238	O55137	SCN KI_vs_WT	0.19211	0.295907	0.528423	Acot1	0.887399
811	3242	O55142	SCN KI_vs_WT	0.0622768	0.178195	0.73278	Rpl35a	0.986952
812	3246	O55143	SCN KI_vs_WT	0.00606513	0.0462	0.897778	Atp2a2	1
813	3250	O55143;Q8R429	SCN KI_vs_WT	-0.0261717	0.0784	0.744333	NA	0.992998
814	3254	O55176	SCN KI_vs_WT	-0.0889353	0.122167	0.480589	Pja1	0.86719
815	3258	O55186	SCN KI_vs_WT	-0.0950207	0.207995	0.655944	Cd59a	0.94855
816	3262	O55192	SCN KI_vs_WT	-0.0350263	0.124996	0.784081	Slc6a2	1
817	3266	O55201	SCN KI_vs_WT	-0.0199443	0.0531	0.713782	Supt5	0.977443
818	3270	O55222	SCN KI_vs_WT	-0.0196498	0.0584	0.742353	Ilk	0.991631
819	3274	O55229	SCN KI_vs_WT	0.0283758	0.0397	0.488008	Chkb	0.86948
820	3278	O55234	SCN KI_vs_WT	0.057357	0.047	0.245439	Psmb5	0.722496
821	3282	O55236	SCN KI_vs_WT	-0.0120841	0.0974	0.903329	Rngtt	1
822	3286	O55242	SCN KI_vs_WT	-0.0916044	0.175403	0.611002	Sigmar1	0.926491
823	3290	O70133	SCN KI_vs_WT	-0.0359197	0.0343	0.315714	Dhx9	0.779236
824	3294	O70139	SCN KI_vs_WT	-0.328339	0.215632	0.153745	Pkig	0.615874
825	3298	O70146	SCN KI_vs_WT	-0.00231002	0.133672	0.986496	Tesk1	1
826	3302	O70152	SCN KI_vs_WT	-0.106769	0.0604	0.102531	Dpm1	0.532063
827	3306	O70161	SCN KI_vs_WT	-0.0184428	0.0558	0.746908	Pip5k1c	0.993919
828	3310	O70166	SCN KI_vs_WT	0.00585102	0.0598	0.923722	Stmn3	1
829	3314	O70172	SCN KI_vs_WT	-0.00243306	0.111386	0.982932	Pip4k2a	1
830	3318	O70174	SCN KI_vs_WT	-0.0980288	0.0917	0.306246	Chrna4	0.772269
831	3322	O70176	SCN KI_vs_WT	0.0675535	0.115794	0.570429	Adcyap1	0.907384
832	3326	O70194	SCN KI_vs_WT	-0.0848717	0.0709	0.25416	Eif3d	0.73124
833	3330	O70200	SCN KI_vs_WT	-0.0407706	0.34719	0.908462	Aif1	1
834	3334	O70209	SCN KI_vs_WT	0.178264	0.163942	0.298237	Pdlim3	0.766198
835	3338	O70220	SCN KI_vs_WT	-0.53538	0.390507	0.219448	Foxq1	0.695742
836	3342	O70228	SCN KI_vs_WT	-0.0157752	0.0498	0.756655	Atp9a	0.99914
837	3346	O70250	SCN KI_vs_WT	0.0616597	0.159091	0.705117	Pgam2	0.972891
838	3350	O70251	SCN KI_vs_WT	-0.135359	0.146537	0.373833	Eef1b2	0.816189
839	3354	O70252	SCN KI_vs_WT	-0.105274	0.102339	0.323922	Hmox2	0.784813
840	3358	O70258	SCN KI_vs_WT	-0.0475438	0.0657	0.49669	Sgce	0.874118
841	3362	O70274	SCN KI_vs_WT	0.0253853	0.387369	0.948829	Ptp4a2	1
842	3366	O70279	SCN KI_vs_WT	-0.00936689	0.286222	0.974607	Ess2	1
843	3370	O70281	SCN KI_vs_WT	0.0396611	0.109891	0.730531	Tpst1	0.986213
844	3374	O70293	SCN KI_vs_WT	0.00783937	0.0667	0.908385	Grk6	1
845	3378	O70293;O70291	SCN KI_vs_WT	-0.194035	0.300696	0.530887	NA	0.888487
846	3382	O70305	SCN KI_vs_WT	-0.00467988	0.0651	0.943881	Atxn2	1
847	3386	O70309	SCN KI_vs_WT	0.0369611	0.0889	0.684806	Itgb5	0.962389
848	3390	O70310	SCN KI_vs_WT	-0.0214091	0.0663	0.752246	Nmt1	0.996732
849	3394	O70311	SCN KI_vs_WT	-0.113753	0.045	0.0266138	Nmt2	0.270545
850	3398	O70318	SCN KI_vs_WT	0.000247241	0.0724	0.997331	Epb41l2	1
851	3402	O70325	SCN KI_vs_WT	0.0155001	0.039	0.697823	Gpx4	0.969442
852	3406	O70340	SCN KI_vs_WT	-0.00664592	0.136647	0.96201	Nptx2	1
853	3410	O70342	SCN KI_vs_WT	NA	NA	NA	Npy5r	NA
854	3414	O70348	SCN KI_vs_WT	0.0226571	0.056	0.699796	Dxo	0.970515
855	3418	O70354	SCN KI_vs_WT	-0.32525	0.180964	0.0974768	Car11	0.521102
856	3422	O70362	SCN KI_vs_WT	0.0335089	0.101785	0.74767	NA	0.994295
857	3426	O70370	SCN KI_vs_WT	-0.104571	0.160812	0.527773	Ctss	0.887084
858	3430	O70378	SCN KI_vs_WT	-0.0550577	0.135555	0.691771	Emc8	0.966008
859	3434	O70400	SCN KI_vs_WT	-0.0285452	0.129952	0.829828	Pdlim1	1
860	3438	O70401	SCN KI_vs_WT	0.0747434	0.113042	0.520978	NA	0.88525
861	3442	O70404	SCN KI_vs_WT	0.173459	0.0962	0.0965751	Vamp8	0.519093
862	3446	O70405	SCN KI_vs_WT	-0.0947534	0.261051	0.722941	Ulk1	0.981586
863	3450	O70422	SCN KI_vs_WT	0.111746	0.0806	0.190776	Gtf2h4	0.663682
864	3454	O70423	SCN KI_vs_WT	-0.272155	0.191865	0.1815	Aoc3	0.654416
865	3458	O70423;Q812C9	SCN KI_vs_WT	-0.106398	0.15235	0.49825	NA	0.874896
866	3462	O70433	SCN KI_vs_WT	-0.00955927	0.121551	0.938612	Fhl2	1
867	3466	O70435	SCN KI_vs_WT	-0.0312359	0.038	0.426642	Psma3	0.841134
868	3470	O70439	SCN KI_vs_WT	0.0949625	0.108311	0.397831	NA	0.828307
869	3474	O70443	SCN KI_vs_WT	-0.0370904	0.0657	0.582695	Gnaz	0.912306
870	3478	O70456	SCN KI_vs_WT	0.103046	0.172674	0.561754	Sfn	0.902652
871	3482	O70475	SCN KI_vs_WT	0.13088	0.129853	0.333391	Ugdh	0.789916
872	3486	O70480	SCN KI_vs_WT	0.0948423	0.319266	0.771497	Vamp4	1
873	3490	O70481	SCN KI_vs_WT	-0.0216915	0.0374	0.573112	Ubr1	0.908448
874	3494	O70492	SCN KI_vs_WT	-0.0660786	0.13523	0.633905	NA	0.938789
875	3498	O70493	SCN KI_vs_WT	0.00987186	0.0677	0.886501	Snx12	1
876	3502	O70494	SCN KI_vs_WT	0.211829	0.15475	0.22008	Sp3	0.696565
877	3506	O70496	SCN KI_vs_WT	-0.00586467	0.0617	0.9258	Clcn7	1
878	3510	O70503	SCN KI_vs_WT	-0.0564072	0.0966	0.569959	Hsd17b12	0.907222
879	3514	O70507	SCN KI_vs_WT	-0.0705336	0.11799	0.561091	NA	0.90217
880	3518	O70551	SCN KI_vs_WT	-0.0541803	0.116172	0.649297	Srpk1	0.946371
881	3522	O70566	SCN KI_vs_WT	-0.00824019	0.0577	0.88887	Diaph2	1
882	3526	O70572	SCN KI_vs_WT	-0.0568292	0.082	0.501714	Smpd2	0.876051
883	3530	O70579	SCN KI_vs_WT	-0.352996	0.287596	0.265639	Slc25a17	0.742476
884	3534	O70585	SCN KI_vs_WT	-0.0527354	0.125463	0.681677	Dtnb	0.960844
885	3538	O70589	SCN KI_vs_WT	-0.0184443	0.0516	0.72683	Cask	0.983982
886	3542	O70591	SCN KI_vs_WT	-0.0196946	0.0869	0.824457	Pfdn2	1
887	3546	O70622	SCN KI_vs_WT	-0.0591352	0.0968	0.552545	Rtn2	0.897548
888	3550	O70628	SCN KI_vs_WT	-0.119719	0.0505	0.0555735	Pde9a	0.398733
889	3554	O88196	SCN KI_vs_WT	0.00550571	0.10438	0.958802	NA	1
890	3558	O88271	SCN KI_vs_WT	0.00666133	0.104605	0.950273	Cfdp1	1
891	3562	O88273	SCN KI_vs_WT	0.159757	0.115093	0.214462	Grem2	0.689831
892	3566	O88286	SCN KI_vs_WT	-0.141367	0.132034	0.305374	Wiz	0.77172
893	3570	O88291	SCN KI_vs_WT	0.0235079	0.067	0.731909	Zfp326	0.986527
894	3574	O88307	SCN KI_vs_WT	-0.0824549	0.124217	0.519371	Sorl1	0.884703
895	3578	O88322	SCN KI_vs_WT	0.000848752	0.0785	0.991548	Nid2	1
896	3582	O88325	SCN KI_vs_WT	-0.0422749	0.102687	0.694872	Naglu	0.967768
897	3586	O88342	SCN KI_vs_WT	0.0644315	0.0351	0.0910625	Wdr1	0.506436
898	3590	O88343	SCN KI_vs_WT	0.010893	0.0879	0.90338	Slc4a4	1
899	3594	O88351	SCN KI_vs_WT	0.0212536	0.0804	0.79601	Ikbkb	1
900	3598	O88384	SCN KI_vs_WT	0.0677704	0.0566	0.254474	NA	0.731674
901	3602	O88393	SCN KI_vs_WT	0.0657629	0.0938	0.509406	Tgfbr3	0.879891
902	3606	O88413	SCN KI_vs_WT	-0.0157127	0.102791	0.881048	Tulp3	1
903	3610	O88428	SCN KI_vs_WT	-0.0114783	0.0884	0.898882	Papss2	1
904	3614	O88441	SCN KI_vs_WT	0.0405468	0.0659	0.550044	Mtx2	0.896531
905	3618	O88444	SCN KI_vs_WT	0.0374036	0.0915	0.689898	Adcy1	0.964788
906	3622	O88447	SCN KI_vs_WT	-0.0520372	0.131471	0.699193	NA	0.970106
907	3626	O88448	SCN KI_vs_WT	-0.0125962	0.0387	0.750154	NA	0.995428
908	3630	O88455	SCN KI_vs_WT	-0.503133	0.212234	0.0353595	Dhcr7	0.317474
909	3634	O88456	SCN KI_vs_WT	0.0832827	0.0768	0.299732	Capns1	0.766484
910	3638	O88456;Q9D7J7	SCN KI_vs_WT	-0.2386	0.0936	0.0435834	NA	0.352243
911	3642	O88485	SCN KI_vs_WT	-0.00506734	0.0776	0.948981	Dync1i1	1
912	3646	O88487	SCN KI_vs_WT	0.0996276	0.0715	0.188578	Dync1i2	0.662091
913	3650	O88491	SCN KI_vs_WT	0.0910476	0.120094	0.462998	NA	0.859018
914	3654	O88492	SCN KI_vs_WT	-0.0116595	0.178384	0.948962	Plin4	1
915	3658	O88495	SCN KI_vs_WT	-0.137471	0.191131	0.48576	Gpr50	0.869065
916	3662	O88502	SCN KI_vs_WT	0.0448708	0.136551	0.74812	Pde8a	0.994522
917	3666	O88507	SCN KI_vs_WT	-0.0123417	0.0617	0.844742	Cntfr	1
918	3670	O88520	SCN KI_vs_WT	0.0814228	0.0875	0.370485	Shoc2	0.814057
919	3674	O88522	SCN KI_vs_WT	-0.0286868	0.0654	0.668651	Ikbkg	0.95552
920	3678	O88531	SCN KI_vs_WT	0.033996	0.11306	0.768797	Ppt1	1
921	3682	O88532	SCN KI_vs_WT	0.0850049	0.0521	0.128884	Zfr	0.579732
922	3686	O88533	SCN KI_vs_WT	0.0725501	0.0838	0.403425	Ddc	0.831284
923	3690	O88543	SCN KI_vs_WT	0.0393212	0.0473	0.422235	Cops3	0.83932
924	3694	O88544	SCN KI_vs_WT	0.0871085	0.0638	0.197021	Cops4	0.671564
925	3698	O88545	SCN KI_vs_WT	-0.0155884	0.0451	0.735858	Cops6	0.98868
926	3702	O88554	SCN KI_vs_WT	0.040438	0.168794	0.814706	Parp2	1
927	3706	O88559	SCN KI_vs_WT	-0.245585	0.162809	0.157315	Men1	0.619382
928	3710	O88561	SCN KI_vs_WT	-0.0093381	0.105598	0.930993	Slc27a3	1
929	3714	O88569	SCN KI_vs_WT	-0.00554979	0.0705	0.938574	Hnrnpa2b1	1
930	3718	O88572	SCN KI_vs_WT	0.371859	0.212994	0.106359	Lrp6	0.540634
931	3722	O88587	SCN KI_vs_WT	0.0400734	0.20587	0.84892	Comt	1
932	3726	O88597	SCN KI_vs_WT	-0.0550441	0.108927	0.622479	Becn1	0.932473
933	3730	O88602	SCN KI_vs_WT	-0.0563308	0.14331	0.701161	Cacng2	0.970849
934	3734	O88622	SCN KI_vs_WT	-0.0393951	0.077	0.618061	NA	0.930175
935	3738	O88630	SCN KI_vs_WT	0.177407	0.0473	0.00276344	Gosr1	0.0614746
936	3742	O88643	SCN KI_vs_WT	0.0566447	0.0475	0.256062	NA	0.733418
937	3746	O88653	SCN KI_vs_WT	-0.018967	0.151809	0.90264	Lamtor3	1
938	3750	O88665	SCN KI_vs_WT	NA	NA	NA	Brd7	NA
939	3754	O88667	SCN KI_vs_WT	0.00187642	0.318371	0.995394	NA	1
940	3758	O88685	SCN KI_vs_WT	-0.0738562	0.0382	0.0769434	Psmc3	0.469082
941	3762	O88693	SCN KI_vs_WT	0.141703	0.353026	0.695185	Ugcg	0.967956
942	3766	O88696	SCN KI_vs_WT	-0.021945	0.0622	0.730174	Clpp	0.98605
943	3770	O88697	SCN KI_vs_WT	-0.0113997	0.101852	0.912734	Stk16	1
944	3774	O88703	SCN KI_vs_WT	-0.151797	0.122352	0.238438	Hcn2	0.716893
945	3778	O88704	SCN KI_vs_WT	-0.0142413	0.0829	0.866538	Hcn1	1
946	3782	O88705	SCN KI_vs_WT	-0.0117657	0.11172	0.917866	Hcn3	1
947	3786	O88708	SCN KI_vs_WT	-0.133807	0.184523	0.482261	Orc4	0.868116
948	3790	O88712	SCN KI_vs_WT	0.0301762	0.0704	0.675905	Ctbp1	0.958698
949	3794	O88735	SCN KI_vs_WT	0.0514028	0.06	0.408711	Map7	0.83447
950	3798	O88736	SCN KI_vs_WT	0.0748052	0.139052	0.600436	Hsd17b7	0.920964
951	3802	O88737	SCN KI_vs_WT	-0.0529393	0.0437	0.249442	Bsn	0.726975
952	3806	O88738	SCN KI_vs_WT	-0.00800505	0.0491	0.873149	Birc6	1
953	3810	O88741	SCN KI_vs_WT	-0.0282736	0.0707	0.696422	Gdap1	0.968429
954	3814	O88745	SCN KI_vs_WT	-0.0515229	0.0839	0.550775	Scrg1	0.896683
955	3818	O88746	SCN KI_vs_WT	-0.0889542	0.072	0.240177	Tom1	0.718747
956	3822	O88792	SCN KI_vs_WT	-0.0916528	0.0961	0.358963	F11r	0.807448
957	3826	O88796	SCN KI_vs_WT	0.0606844	0.0904	0.514606	Rpp30	0.882594
958	3830	O88809	SCN KI_vs_WT	-0.126155	0.122961	0.325142	Dcx	0.78525
959	3834	O88811	SCN KI_vs_WT	0.0211752	0.0578	0.720396	Stam2	0.980626
960	3838	O88819	SCN KI_vs_WT	-0.0771647	0.174033	0.665372	Fut9	0.954062
961	3842	O88824	SCN KI_vs_WT	-0.0630026	0.229666	0.793037	Jtb	1
962	3846	O88829	SCN KI_vs_WT	0.102827	0.0663	0.146638	St3gal5	0.604905
963	3850	O88834	SCN KI_vs_WT	-0.0129091	0.115224	0.912648	Shd	1
964	3854	O88839	SCN KI_vs_WT	0.0191427	0.0781	0.8105	Adam15	1
965	3858	O88842	SCN KI_vs_WT	0.107048	0.234265	0.663782	NA	0.953347
966	3862	O88843	SCN KI_vs_WT	0.137507	0.101543	0.224454	Cradd	0.70076
967	3866	O88844	SCN KI_vs_WT	0.0274758	0.0547	0.624533	Idh1	0.933819
968	3870	O88845	SCN KI_vs_WT	-0.0955695	0.0721	0.209406	Akap10	0.684156
969	3874	O88848	SCN KI_vs_WT	-0.0514468	0.157622	0.749749	Arl6	0.995263
970	3878	O88851	SCN KI_vs_WT	0.00710407	0.0892	0.937843	Rbbp9	1
971	3882	O88852	SCN KI_vs_WT	0.0627094	0.1858	0.741563	Tspyl1	0.99109
972	3886	O88874	SCN KI_vs_WT	0.0088275	0.0707	0.902674	NA	1
973	3890	O88876	SCN KI_vs_WT	-0.265743	0.145465	0.1175	Dhrs3	0.561191
974	3894	O88878	SCN KI_vs_WT	-0.231667	0.255377	0.382179	Zfand5	0.820263
975	3898	O88879	SCN KI_vs_WT	-0.0427421	0.0633	0.52445	Apaf1	0.885859
976	3902	O88888	SCN KI_vs_WT	-0.0932628	0.149463	0.544317	Apba3	0.894583
977	3906	O88895	SCN KI_vs_WT	-0.0564046	0.104086	0.597803	NA	0.919359
978	3910	O88907;Q8C5D8	SCN KI_vs_WT	0.0405727	0.310855	0.898318	NA	1
979	3914	O88909	SCN KI_vs_WT	NA	NA	NA	Slc22a8	NA
980	3918	O88910	SCN KI_vs_WT	-0.0123935	0.0869	0.888942	NA	1
981	3922	O88935	SCN KI_vs_WT	0.0317962	0.0887	0.726135	Syn1	0.983339
982	3926	O88939	SCN KI_vs_WT	-0.0697797	0.163636	0.677343	Zbtb7a	0.958804
983	3930	O88951	SCN KI_vs_WT	-0.0538083	0.0823	0.525581	Lin7b	0.886575
984	3934	O88952	SCN KI_vs_WT	0.0519217	0.106297	0.63403	Lin7c	0.938844
985	3938	O88958	SCN KI_vs_WT	0.00700008	0.0521	0.89527	Gnpda1	1
986	3942	O88967	SCN KI_vs_WT	-0.0208569	0.0385	0.598276	Yme1l1	0.919622
987	3946	O88968	SCN KI_vs_WT	-0.0214879	0.134091	0.877944	Tcn2	1
988	3950	O88974	SCN KI_vs_WT	0.156812	0.117245	0.205867	NA	0.680655
989	3954	O88983	SCN KI_vs_WT	0.00578507	0.0842	0.94637	Stx8	1
990	3958	O88986	SCN KI_vs_WT	-0.0791917	0.0999	0.443346	Gcat	0.847439
991	3962	O88990	SCN KI_vs_WT	-0.176329	0.38217	0.652771	Actn3	0.947655
992	3966	O88998	SCN KI_vs_WT	-0.0166058	0.0719	0.82129	Olfm1	1
993	3970	O89001	SCN KI_vs_WT	0.0316013	0.0486	0.527746	Cpd	0.887081
994	3974	O89017	SCN KI_vs_WT	0.0600322	0.119954	0.625804	Lgmn	0.934276
995	3978	O89020	SCN KI_vs_WT	0.173203	0.156612	0.290431	Afm	0.75921
996	3982	O89023	SCN KI_vs_WT	0.162409	0.261901	0.546777	Tpp1	0.895564
997	3986	O89026	SCN KI_vs_WT	-0.0356671	0.0849	0.681727	Robo1	0.960844
998	3990	O89029	SCN KI_vs_WT	0.0246272	0.129391	0.852232	Matn4	1
999	3994	O89032	SCN KI_vs_WT	-0.0496649	0.091	0.595265	Sh3pxd2a	0.918567
1000	3998	O89050	SCN KI_vs_WT	0.0591193	0.10892	0.597219	Mkln1	0.919243
1001	4002	O89051	SCN KI_vs_WT	0.0370861	0.0972	0.709424	Itm2b	0.975043
1002	4006	O89053	SCN KI_vs_WT	0.101017	0.0485	0.0595322	Coro1a	0.412766
1003	4010	O89079	SCN KI_vs_WT	-0.0599104	0.101803	0.567115	Cope	0.905629
1004	4014	O89084	SCN KI_vs_WT	0.242798	0.131834	0.0903586	Pde4a	0.504467
1005	4018	O89086	SCN KI_vs_WT	0.115372	0.123512	0.368669	Rbm3	0.813268
1006	4022	O89103	SCN KI_vs_WT	NA	NA	NA	Cd93	NA
1007	4026	O89106	SCN KI_vs_WT	-0.114705	0.10378	0.290711	Fhit	0.759479
1008	4030	O89112	SCN KI_vs_WT	0.0519714	0.0329	0.139828	Lancl1	0.594369
1009	4034	O89114	SCN KI_vs_WT	-0.0652896	0.0922	0.492222	NA	0.871659
1010	4038	O89116	SCN KI_vs_WT	0.103479	0.130033	0.441616	Vti1a	0.847044
1011	4042	P00158	SCN KI_vs_WT	-0.339116	0.329827	0.324152	CYTB	0.784881
1012	4046	P00375	SCN KI_vs_WT	0.0480861	0.108403	0.665234	Dhfr	0.954019
1013	4050	P00405	SCN KI_vs_WT	-0.231842	0.181885	0.226557	COX2	0.702494
1014	4054	P00416	SCN KI_vs_WT	0.0645948	0.234916	0.788016	COX3	1
1015	4058	P00493	SCN KI_vs_WT	0.0281341	0.0455	0.547819	Hprt1	0.895714
1016	4062	P00520	SCN KI_vs_WT	0.192297	0.0973	0.0715077	Abl1	0.453622
1017	4066	P00755	SCN KI_vs_WT	0.393928	0.333381	0.260246	Klk1b1	0.737055
1018	4070	P00848	SCN KI_vs_WT	-0.266039	0.401197	0.519794	ATP6	0.885029
1019	4074	P00920	SCN KI_vs_WT	-0.0265333	0.0997	0.794724	Car2	1
1020	4078	P01027	SCN KI_vs_WT	0.206207	0.174361	0.259854	C3	0.737003
1021	4082	P01029	SCN KI_vs_WT	0.195917	0.135781	0.174642	C4b	0.643651
1022	4086	P01193	SCN KI_vs_WT	0.587992	0.176777	0.00604074	Pomc	0.106868
1023	4090	P01831	SCN KI_vs_WT	0.112276	0.109239	0.324316	Thy1	0.785035
1024	4094	P01837	SCN KI_vs_WT	0.49346	0.300586	0.12659	NA	0.576508
1025	4098	P01867	SCN KI_vs_WT	0.629117	0.282534	0.0458824	NA	0.362623
1026	4102	P01869	SCN KI_vs_WT	0.585758	0.286872	0.0637792	NA	0.428041
1027	4106	P01872	SCN KI_vs_WT	0.0131429	0.242983	0.957754	NA	1
1028	4110	P01887	SCN KI_vs_WT	0.069879	0.122797	0.57981	B2m	0.910831
1029	4114	P01897	SCN KI_vs_WT	0.0245473	0.141684	0.86534	NA	1
1030	4118	P01897;P01896	SCN KI_vs_WT	0.206271	0.149356	0.192435	NA	0.665392
1031	4122	P01897;P14427	SCN KI_vs_WT	0.00277087	0.0985	0.978476	NA	1
1032	4126	P01898	SCN KI_vs_WT	0.282414	0.144204	0.0738349	H2-Q10	0.461678
1033	4130	P01901	SCN KI_vs_WT	0.203185	0.214356	0.361885	H2-K1	0.809086
1034	4134	P01942	SCN KI_vs_WT	0.402875	0.249189	0.131901	NA	0.584367
1035	4138	P02088	SCN KI_vs_WT	0.224303	0.238507	0.365534	Hbb-b1	0.811218
1036	4142	P02463;Q63ZW6	SCN KI_vs_WT	NA	NA	NA	NA	NA
1037	4146	P02468	SCN KI_vs_WT	-0.124563	0.0873	0.179278	NA	0.650962
1038	4150	P02469	SCN KI_vs_WT	-0.0765074	0.102261	0.468776	Lamb1	0.861696
1039	4154	P03888	SCN KI_vs_WT	-0.344497	0.283581	0.247802	ND1	0.725476
1040	4158	P03899	SCN KI_vs_WT	-0.0975267	0.170638	0.578181	ND3	0.910486
1041	4162	P03911	SCN KI_vs_WT	-0.0642394	0.1311	0.632969	ND4	0.938272
1042	4166	P03921	SCN KI_vs_WT	-0.174054	0.216248	0.436546	ND5	0.845534
1043	4170	P03930	SCN KI_vs_WT	-0.200036	0.405431	0.630643	ATP8	0.937202
1044	4174	P03953	SCN KI_vs_WT	-0.942593	0.555716	0.115617	Cfd	0.558756
1045	4178	P03958	SCN KI_vs_WT	0.0480573	0.155201	0.762142	Ada	1
1046	4182	P03975	SCN KI_vs_WT	0.0350496	0.0916	0.708674	NA	0.974988
1047	4186	P03995	SCN KI_vs_WT	0.184454	0.182936	0.333211	Gfap	0.789751
1048	4190	P04117	SCN KI_vs_WT	0.591035	0.398908	0.164214	Fabp4	0.630821
1049	4194	P04186	SCN KI_vs_WT	0.175732	0.133036	0.211161	NA	0.68638
1050	4198	P04247	SCN KI_vs_WT	0.629061	0.212356	0.01187	Mb	0.164362
1051	4202	P04370	SCN KI_vs_WT	0.0664835	0.224554	0.772239	Mbp	1
1052	4206	P04627	SCN KI_vs_WT	0.00530848	0.0673	0.938464	Araf	1
1053	4210	P04919	SCN KI_vs_WT	0.230801	0.228454	0.332302	Slc4a1	0.789596
1054	4214	P04925	SCN KI_vs_WT	-0.0551796	0.197341	0.784533	Prnp	1
1055	4218	P04939;Q80YX8	SCN KI_vs_WT	-0.337166	0.5222	0.53065	NA	0.888331
1056	4222	P05063	SCN KI_vs_WT	0.00239274	0.0885	0.978885	Aldoc	1
1057	4226	P05064	SCN KI_vs_WT	-0.0883276	0.0795	0.288504	Aldoa	0.758522
1058	4230	P05064;A6ZI46	SCN KI_vs_WT	0.155345	0.124158	0.234708	NA	0.712531
1059	4234	P05064;A6ZI46;A6ZI47	SCN KI_vs_WT	0.0081025	0.177574	0.964357	NA	1
1060	4238	P05064;A6ZI47	SCN KI_vs_WT	0.142042	0.0687	0.0608733	NA	0.417544
1061	4242	P05132	SCN KI_vs_WT	-0.420425	0.205417	0.0632403	Prkaca	0.426924
1062	4246	P05201	SCN KI_vs_WT	0.0507608	0.077	0.522458	Got1	0.885802
1063	4250	P05202	SCN KI_vs_WT	-0.107764	0.0427	0.0266072	Got2	0.270545
1064	4254	P05480	SCN KI_vs_WT	0.0429786	0.0469	0.377059	Src	0.818256
1065	4258	P05480;P16056;Q62190;Q922K9;Q62270	SCN KI_vs_WT	0.0727097	0.0755	0.354473	NA	0.804313
1066	4262	P05532	SCN KI_vs_WT	-0.00226749	0.118717	0.985075	Kit	1
1067	4266	P05555	SCN KI_vs_WT	-0.0197346	0.129647	0.881544	NA	1
1068	4270	P05622	SCN KI_vs_WT	0.0161346	0.071	0.824156	Pdgfrb	1
1069	4274	P05977	SCN KI_vs_WT	0.0322558	0.347728	0.927624	Myl1	1
1070	4278	P06151	SCN KI_vs_WT	0.0546691	0.0985	0.589264	Ldha	0.916042
1071	4282	P06537	SCN KI_vs_WT	0.0437237	0.0769	0.579959	NA	0.910831
1072	4286	P06684	SCN KI_vs_WT	0.122466	0.310788	0.700457	Hc	0.970642
1073	4290	P06728	SCN KI_vs_WT	0.346535	0.228541	0.155338	Apoa4	0.617705
1074	4294	P06745	SCN KI_vs_WT	0.0195457	0.0659	0.771981	Gpi1	1
1075	4298	P06745;CON__Q3ZBD7	SCN KI_vs_WT	0.00182211	0.0647	0.978006	NA	1
1076	4302	P06797	SCN KI_vs_WT	0.0775279	0.101472	0.459609	Ctsl	0.856716
1077	4306	P06800	SCN KI_vs_WT	-0.161697	0.165315	0.347324	NA	0.798858
1078	4310	P06801	SCN KI_vs_WT	-0.00714509	0.175369	0.968171	Me1	1
1079	4314	P06802	SCN KI_vs_WT	-0.334364	0.105728	0.008183	Enpp1	0.128765
1080	4318	P06837	SCN KI_vs_WT	0.00496719	0.349264	0.988887	Gap43	1
1081	4322	P06880	SCN KI_vs_WT	0.581084	0.422516	0.218181	Gh	0.694164
1082	4326	P06909	SCN KI_vs_WT	0.0849022	0.135237	0.541896	Cfh	0.893327
1083	4330	P06909;A0A668KLU9	SCN KI_vs_WT	0.166572	0.0625	0.0372097	NA	0.325449
1084	4334	P07091	SCN KI_vs_WT	0.105358	0.14923	0.506657	S100a4	0.878191
1085	4338	P07214	SCN KI_vs_WT	-0.10515	0.0775	0.199688	Sparc	0.674286
1086	4342	P07309	SCN KI_vs_WT	0.0238711	0.338364	0.944919	Ttr	1
1087	4346	P07310	SCN KI_vs_WT	0.486324	0.348884	0.188611	Ckm	0.662123
1088	4350	P07356	SCN KI_vs_WT	-0.0214528	0.202421	0.917348	Anxa2	1
1089	4354	P07628;P36369	SCN KI_vs_WT	0.840388	0.638909	0.23642	NA	0.714069
1090	4358	P07628;P36369;P36368	SCN KI_vs_WT	0.486754	0.296948	0.127108	NA	0.577264
1091	4362	P07724	SCN KI_vs_WT	0.188698	0.201636	0.367809	Alb	0.81277
1092	4366	P07742	SCN KI_vs_WT	0.0086202	0.158879	0.957624	Rrm1	1
1093	4370	P07759	SCN KI_vs_WT	0.19147	0.320078	0.560828	Serpina3k	0.90217
1094	4374	P07901	SCN KI_vs_WT	0.00827152	0.0502	0.871741	Hsp90aa1	1
1095	4378	P07903	SCN KI_vs_WT	0.0882407	0.0973	0.382371	Ercc1	0.820363
1096	4382	P07934	SCN KI_vs_WT	-0.0793584	0.0531	0.160588	Phkg1	0.625942
1097	4386	P08003	SCN KI_vs_WT	-0.0160816	0.0519	0.761902	Pdia4	1
1098	4390	P08030	SCN KI_vs_WT	0.033092	0.142273	0.819996	Aprt	1
1099	4394	P08032	SCN KI_vs_WT	0.151616	0.176884	0.408154	Spta1	0.834308
1100	4398	P08113	SCN KI_vs_WT	0.00662087	0.0496	0.896087	Hsp90b1	1
1101	4402	P08122	SCN KI_vs_WT	0.0827969	0.295236	0.783914	Col4a2	1
1102	4406	P08207	SCN KI_vs_WT	-0.156796	0.335818	0.64893	S100a10	0.946371
1103	4410	P08226	SCN KI_vs_WT	0.111313	0.0521	0.053952	Apoe	0.393155
1104	4414	P08228	SCN KI_vs_WT	0.159875	0.102912	0.146265	Sod1	0.604698
1105	4418	P08249	SCN KI_vs_WT	0.0414902	0.0633	0.524442	Mdh2	0.885859
1106	4422	P08414	SCN KI_vs_WT	-0.0712146	0.0795	0.387791	NA	0.823182
1107	4426	P08414;P58801	SCN KI_vs_WT	-0.119405	0.159881	0.469543	NA	0.862107
1108	4430	P08551	SCN KI_vs_WT	-0.146781	0.171191	0.408016	Nefl	0.834308
1109	4434	P08553	SCN KI_vs_WT	-0.057322	0.153539	0.715408	Nefm	0.978247
1110	4438	P08556	SCN KI_vs_WT	-0.0584265	0.0766	0.460385	NA	0.857177
1111	4442	P08752	SCN KI_vs_WT	0.0583216	0.0499	0.2649	Gnai2	0.741946
1112	4446	P08775	SCN KI_vs_WT	-0.00948632	0.0487	0.848789	Polr2a	1
1113	4450	P08905	SCN KI_vs_WT	NA	NA	NA	Lyz2	NA
1114	4454	P09055	SCN KI_vs_WT	-0.0491027	0.0908	0.598641	Itgb1	0.919841
1115	4458	P09103	SCN KI_vs_WT	0.0201172	0.0373	0.599673	P4hb	0.920263
1116	4462	P09240	SCN KI_vs_WT	0.0512118	0.147407	0.734296	Cck	0.988062
1117	4466	P09242	SCN KI_vs_WT	-0.145897	0.139666	0.31679	Alpl	0.779852
1118	4470	P09405	SCN KI_vs_WT	-0.0177024	0.105729	0.869819	Ncl	1
1119	4474	P09411	SCN KI_vs_WT	-0.0346782	0.0511	0.510569	Pgk1	0.880791
1120	4478	P09411;P09041	SCN KI_vs_WT	-0.0219791	0.0856	0.801726	NA	1
1121	4482	P09470	SCN KI_vs_WT	-0.0589313	0.113427	0.612824	Ace	0.927695
1122	4486	P09528	SCN KI_vs_WT	-0.2421	0.242887	0.338558	Fth1	0.794015
1123	4490	P09541	SCN KI_vs_WT	-0.23183	0.294728	0.446779	NA	0.849176
1124	4494	P09581	SCN KI_vs_WT	-0.140185	0.0971	0.174294	Csf1r	0.643276
1125	4498	P09671	SCN KI_vs_WT	0.100059	0.0831	0.251821	Sod2	0.729017
1126	4502	P09813	SCN KI_vs_WT	0.148743	0.209424	0.491125	Apoa2	0.87092
1127	4506	P09925	SCN KI_vs_WT	0.0425229	0.065	0.525215	Surf1	0.886483
1128	4510	P09926	SCN KI_vs_WT	-0.0551101	0.478127	0.910143	Surf2	1
1129	4514	P0C028;P0C027	SCN KI_vs_WT	0.0171964	0.0488	0.730556	NA	0.986213
1130	4518	P0C090	SCN KI_vs_WT	-0.0997865	0.241036	0.686185	Rc3h2	0.962925
1131	4522	P0C0A3	SCN KI_vs_WT	0.0191443	0.0935	0.84119	Chmp6	1
1132	4526	P0C192	SCN KI_vs_WT	-0.0673661	0.0635	0.309831	Lrrc4b	0.77476
1133	4530	P0C1Q2	SCN KI_vs_WT	0.0269387	0.113002	0.8156	Pde11a	1
1134	4534	P0C605	SCN KI_vs_WT	-0.146159	0.0844	0.109046	Prkg1	0.546832
1135	4538	P0C673	SCN KI_vs_WT	-0.0390446	0.159018	0.810191	Igsf11	1
1136	4542	P0C6F1	SCN KI_vs_WT	0.414262	0.400093	0.320891	NA	0.783031
1137	4546	P0C7L0	SCN KI_vs_WT	-0.0171027	0.100691	0.867956	NA	1
1138	4550	P0C7M9	SCN KI_vs_WT	-0.033719	0.103691	0.75064	Clec2l	0.99567
1139	4554	P0C7N9	SCN KI_vs_WT	-0.121958	0.103483	0.261427	Psmg4	0.738113
1140	4558	P0C7T6	SCN KI_vs_WT	NA	NA	NA	Atxn1l	NA
1141	4562	P0C872	SCN KI_vs_WT	0.0450474	0.0917	0.640862	Jmjd7	0.942591
1142	4566	P0C913	SCN KI_vs_WT	0.190674	0.467122	0.690324	1500009L16Rik	0.965146
1143	4570	P0CG14	SCN KI_vs_WT	0.0680797	0.103063	0.521372	Chtf8	0.885415
1144	4574	P0CL69;Q7TMA2	SCN KI_vs_WT	0.52443	0.241224	0.0726565	NA	0.45758
1145	4578	P0DJE0	SCN KI_vs_WT	0.777352	0.431806	0.096994	Pet100	0.519756
1146	4582	P0DN34	SCN KI_vs_WT	-0.0152174	0.127388	0.90689	NA	1
1147	4586	P0DN89	SCN KI_vs_WT	-0.281268	0.187501	0.159434	Tmem254	0.623549
1148	4590	P0DP28;P0DP27;P0DP26	SCN KI_vs_WT	-0.280523	0.244085	0.272832	NA	0.74957
1149	4594	P0DP28;P0DP27;P0DP26;P20801	SCN KI_vs_WT	0.0681206	0.130059	0.609979	NA	0.92572
1150	4598	P0DP60	SCN KI_vs_WT	-0.224563	0.135649	0.123724	Lynx1	0.571933
1151	4602	P0DPD9	SCN KI_vs_WT	0.00180084	0.0585	0.97646	NA	1
1152	4606	P0DW87	SCN KI_vs_WT	0.148879	0.0602	0.0294322	NA	0.287084
1153	4610	P10107	SCN KI_vs_WT	0.0463085	0.098	0.645039	Anxa1	0.944628
1154	4614	P10126	SCN KI_vs_WT	0.125617	0.13328	0.364524	Eef1a1	0.810528
1155	4618	P10493	SCN KI_vs_WT	-0.0577441	0.0851	0.510399	Nid1	0.880741
1156	4622	P10518	SCN KI_vs_WT	-0.100776	0.101252	0.339236	Alad	0.794492
1157	4626	P10605	SCN KI_vs_WT	0.00672124	0.0742	0.929345	Ctsb	1
1158	4630	P10630	SCN KI_vs_WT	-0.032712	0.139562	0.818633	Eif4a2	1
1159	4634	P10637	SCN KI_vs_WT	0.0505562	0.119924	0.680792	Mapt	0.96054
1160	4638	P10639	SCN KI_vs_WT	-0.112244	0.151022	0.471645	Txn1	0.862885
1161	4642	P10649	SCN KI_vs_WT	0.184923	0.142534	0.218884	Gstm1	0.695226
1162	4646	P10711	SCN KI_vs_WT	-0.00665634	0.0591	0.912132	Tcea1	1
1163	4650	P10833	SCN KI_vs_WT	-0.0037158	0.122615	0.976322	Rras	1
1164	4654	P10852	SCN KI_vs_WT	-0.0610957	0.0511	0.255359	Slc3a2	0.732662
1165	4658	P10922	SCN KI_vs_WT	-0.0367945	0.114898	0.754298	H1f0	0.997533
1166	4662	P11031	SCN KI_vs_WT	-0.0833503	0.143333	0.571656	Sub1	0.907723
1167	4666	P11087	SCN KI_vs_WT	-0.313742	0.412996	0.462114	Col1a1	0.858218
1168	4670	P11103	SCN KI_vs_WT	-0.130889	0.0445	0.0123276	NA	0.168687
1169	4674	P11214	SCN KI_vs_WT	0.0800243	0.106972	0.468818	Plat	0.861696
1170	4678	P11276	SCN KI_vs_WT	0.0706247	0.138051	0.618226	Fn1	0.930191
1171	4682	P11352	SCN KI_vs_WT	-0.051841	0.113387	0.655692	Gpx1	0.94855
1172	4686	P11404	SCN KI_vs_WT	0.00868707	0.0946	0.928342	Fabp3	1
1173	4690	P11438	SCN KI_vs_WT	-0.0308365	0.0623	0.629446	Lamp1	0.936579
1174	4694	P11499	SCN KI_vs_WT	0.0161947	0.0501	0.752206	Hsp90ab1	0.996716
1175	4698	P11531	SCN KI_vs_WT	-0.0187251	0.0226	0.422904	Dmd	0.839533
1176	4702	P11589;A2BIN1;Q4FZE8;P11588;A9R9W0;A2BIM8;P02762;A2CEK7;P04938;B5X0G2;P11591	SCN KI_vs_WT	-0.23824	0.524377	0.657701	NA	0.949597
1177	4706	P11589;A2BIN1;Q4FZE8;P11588;A9R9W0;A2BIM8;P02762;A2CEK7;P04938;E9PVW0;B5X0G2;E9QA79;L7N222	SCN KI_vs_WT	0.166319	0.451392	0.71895	NA	0.979944
1178	4710	P11589;A2BIN1;Q4FZE8;P11588;A9R9W0;A2BIM8;P02762;A2CEK7;P04938;E9PVW0;E9QA79	SCN KI_vs_WT	-0.0736153	0.796068	0.927848	NA	1
1179	4714	P11627	SCN KI_vs_WT	-0.0189286	0.0984	0.850607	NA	1
1180	4718	P11679	SCN KI_vs_WT	0.255164	0.112821	0.0643999	Krt8	0.429732
1181	4722	P11679;CON__H-INV:HIT000016045	SCN KI_vs_WT	0.0833545	0.152923	0.605354	NA	0.923317
1182	4726	P11679;CON__Q9H552	SCN KI_vs_WT	0.338221	0.155972	0.0732163	NA	0.459367
1183	4730	P11679;CON__REFSEQ:XP_092267	SCN KI_vs_WT	0.0420783	0.212082	0.84928	NA	1
1184	4734	P11688	SCN KI_vs_WT	-0.0190413	0.215789	0.931141	Itga5	1
1185	4738	P11798	SCN KI_vs_WT	0.0559341	0.0821	0.508515	Camk2a	0.879314
1186	4742	P11835	SCN KI_vs_WT	-0.0358881	0.0871	0.687494	Itgb2	0.963669
1187	4746	P11859	SCN KI_vs_WT	-0.0445388	0.242503	0.857345	NA	1
1188	4750	P11862	SCN KI_vs_WT	-0.0221761	0.113536	0.848409	Gas2	1
1189	4754	P11881	SCN KI_vs_WT	-0.0434358	0.0563	0.455124	Itpr1	0.855076
1190	4758	P11930	SCN KI_vs_WT	-0.105968	0.275021	0.706753	Nudt19	0.97384
1191	4762	P11983	SCN KI_vs_WT	-0.0272565	0.0456	0.561101	Tcp1	0.90217
1192	4766	P12023	SCN KI_vs_WT	0.0280462	0.0564	0.628008	App	0.93558
1193	4770	P12032	SCN KI_vs_WT	0.0392659	0.20397	0.853694	Timp1	1
1194	4774	P12265	SCN KI_vs_WT	-0.000431147	0.135407	0.997512	Gusb	1
1195	4778	P12367	SCN KI_vs_WT	-0.0169141	0.0369	0.654942	NA	0.948402
1196	4782	P12382	SCN KI_vs_WT	-0.0434838	0.0408	0.307613	Pfkl	0.773237
1197	4786	P12657	SCN KI_vs_WT	0.117513	0.137267	0.408718	Chrm1	0.83447
1198	4790	P12658	SCN KI_vs_WT	0.0929053	0.07	0.209243	Calb1	0.683998
1199	4794	P12787	SCN KI_vs_WT	-0.0537827	0.105644	0.619919	Cox5a	0.931173
1200	4798	P12815	SCN KI_vs_WT	0.163743	0.121235	0.201737	Pdcd6	0.675786
1201	4802	P12849	SCN KI_vs_WT	0.0705781	0.0675	0.316211	Prkar1b	0.779281
1202	4806	P12960	SCN KI_vs_WT	-0.0750386	0.064	0.263854	Cntn1	0.740987
1203	4810	P12961	SCN KI_vs_WT	0.092429	0.131674	0.496097	Scg5	0.873728
1204	4814	P12970	SCN KI_vs_WT	-0.0453189	0.0681	0.518121	Rpl7a	0.884141
1205	4818	P13020	SCN KI_vs_WT	-0.0329681	0.0863	0.709044	Gsn	0.974991
1206	4822	P13020;CON__Q3SX14	SCN KI_vs_WT	0.0874543	0.0948	0.374322	NA	0.816348
1207	4826	P13346	SCN KI_vs_WT	NA	NA	NA	Fosb	NA
1208	4830	P13405	SCN KI_vs_WT	0.0869473	0.337777	0.801614	Rb1	1
1209	4834	P13439	SCN KI_vs_WT	-0.0202084	0.0572	0.72978	Umps	0.985731
1210	4838	P13562	SCN KI_vs_WT	-0.268614	0.307885	0.416506	Gnrh1	0.836885
1211	4842	P13595	SCN KI_vs_WT	0.0434217	0.0797	0.595823	Ncam1	0.918582
1212	4846	P13597	SCN KI_vs_WT	0.0056575	0.129897	0.965976	Icam1	1
1213	4850	P13634	SCN KI_vs_WT	0.23415	0.20488	0.275385	Car1	0.750901
1214	4854	P13707	SCN KI_vs_WT	0.0182708	0.0899	0.842372	Gpd1	1
1215	4858	P13864	SCN KI_vs_WT	0.0335998	0.0752	0.663176	Dnmt1	0.953053
1216	4862	P14069	SCN KI_vs_WT	-0.136247	0.200674	0.510054	S100a6	0.880376
1217	4866	P14094	SCN KI_vs_WT	0.0840724	0.0657	0.225009	Atp1b1	0.701229
1218	4870	P14106	SCN KI_vs_WT	0.101684	0.0868	0.263918	C1qb	0.740987
1219	4874	P14115	SCN KI_vs_WT	0.0370475	0.0811	0.655819	Rpl27a	0.94855
1220	4878	P14131	SCN KI_vs_WT	0.0217208	0.0843	0.801129	Rps16	1
1221	4882	P14148	SCN KI_vs_WT	0.0259168	0.0696	0.715934	Rpl7	0.978516
1222	4886	P14152	SCN KI_vs_WT	-0.0740669	0.0585	0.22934	Mdh1	0.705449
1223	4890	P14206	SCN KI_vs_WT	-0.055291	0.0722	0.458838	Rpsa	0.85609
1224	4894	P14211	SCN KI_vs_WT	-0.0132302	0.124324	0.91701	Calr	1
1225	4898	P14231	SCN KI_vs_WT	-0.12152	0.0661	0.0907948	Atp1b2	0.505653
1226	4902	P14576	SCN KI_vs_WT	0.0256746	0.117719	0.831015	Srp54a	1
1227	4906	P14576;E9PXC0	SCN KI_vs_WT	0.130864	0.0633	0.0608624	NA	0.417544
1228	4910	P14602	SCN KI_vs_WT	0.0439222	0.0824	0.603807	Hspb1	0.922333
1229	4914	P14685	SCN KI_vs_WT	0.0293025	0.0319	0.376481	Psmd3	0.817823
1230	4918	P14733	SCN KI_vs_WT	-0.0277488	0.0617	0.660992	Lmnb1	0.952006
1231	4922	P14824	SCN KI_vs_WT	0.0420968	0.0533	0.444604	Anxa6	0.847744
1232	4926	P14869	SCN KI_vs_WT	-0.0285869	0.077	0.716855	Rplp0	0.978767
1233	4930	P14873	SCN KI_vs_WT	-0.040272	0.107387	0.714192	Map1b	0.977443
1234	4934	P14901	SCN KI_vs_WT	-0.0650301	0.117237	0.589296	Hmox1	0.916042
1235	4938	P15066	SCN KI_vs_WT	0.0049826	0.203784	0.980895	Jund	1
1236	4942	P15066;P05627	SCN KI_vs_WT	NA	NA	NA	NA	NA
1237	4946	P15105	SCN KI_vs_WT	-0.0372076	0.0868	0.67571	Glul	0.958678
1238	4950	P15116	SCN KI_vs_WT	-0.0404833	0.0698	0.572691	Cdh2	0.908222
1239	4954	P15208	SCN KI_vs_WT	-0.0461032	0.0542	0.411646	Insr	0.835752
1240	4958	P15209	SCN KI_vs_WT	-0.0929217	0.0772	0.252036	Ntrk2	0.729017
1241	4962	P15261	SCN KI_vs_WT	0.0850726	0.101683	0.419142	Ifngr1	0.838176
1242	4966	P15306	SCN KI_vs_WT	NA	NA	NA	Thbd	NA
1243	4970	P15307	SCN KI_vs_WT	NA	NA	NA	NA	NA
1244	4974	P15327	SCN KI_vs_WT	0.157245	0.128568	0.244786	Bpgm	0.721759
1245	4978	P15331	SCN KI_vs_WT	0.128024	0.218278	0.568397	NA	0.90618
1246	4982	P15379	SCN KI_vs_WT	-0.370108	0.164923	0.0444648	Cd44	0.355523
1247	4986	P15388	SCN KI_vs_WT	-0.0469063	0.17291	0.790789	Kcnc1	1
1248	4990	P15508	SCN KI_vs_WT	-0.00882533	0.0743	0.90739	NA	1
1249	4994	P15532	SCN KI_vs_WT	0.0210712	0.255641	0.935668	Nme1	1
1250	4998	P15626	SCN KI_vs_WT	0.115509	0.171896	0.526616	Gstm2	0.886648
1251	5002	P15655	SCN KI_vs_WT	0.126215	0.0858	0.166891	Fgf2	0.633904
1252	5006	P15806	SCN KI_vs_WT	0.234625	0.337587	0.500289	Tcf3	0.875361
1253	5010	P15920	SCN KI_vs_WT	-0.0297346	0.079	0.713298	Atp6v0a2	0.977156
1254	5014	P15947	SCN KI_vs_WT	0.930967	0.285735	0.00685208	Klk1	0.115784
1255	5018	P15948	SCN KI_vs_WT	0.612434	0.274008	0.0451948	Klk1b22	0.359195
1256	5022	P15949	SCN KI_vs_WT	0.787292	0.57333	0.194807	Klk1b9	0.66888
1257	5026	P16014	SCN KI_vs_WT	0.036934	0.227267	0.873606	Chgb	1
1258	5030	P16015	SCN KI_vs_WT	0.390151	0.272718	0.178064	Car3	0.64893
1259	5034	P16043	SCN KI_vs_WT	0.0628094	0.133761	0.655246	Ghrh	0.94855
1260	5038	P16045	SCN KI_vs_WT	0.0775144	0.0939	0.425398	Lgals1	0.840807
1261	5042	P16054	SCN KI_vs_WT	-0.0232299	0.0871	0.794287	Prkce	1
1262	5046	P16092	SCN KI_vs_WT	-0.0476553	0.199323	0.815073	Fgfr1	1
1263	5050	P16110	SCN KI_vs_WT	-0.0911782	0.133134	0.518998	NA	0.884309
1264	5054	P16125	SCN KI_vs_WT	-0.107287	0.172443	0.545478	Ldhb	0.894988
1265	5058	P16254	SCN KI_vs_WT	-0.055166	0.125238	0.667414	Srp14	0.954891
1266	5062	P16283	SCN KI_vs_WT	-0.0273162	0.0675	0.692784	Slc4a3	0.966587
1267	5066	P16283;O35936	SCN KI_vs_WT	0.243834	0.151561	0.15878	NA	0.621809
1268	5070	P16301	SCN KI_vs_WT	0.246249	0.228831	0.303036	Lcat	0.769881
1269	5074	P16330	SCN KI_vs_WT	-0.0532278	0.190757	0.784969	Cnp	1
1270	5078	P16332	SCN KI_vs_WT	0.0218132	0.10443	0.838047	Mmut	1
1271	5082	P16388	SCN KI_vs_WT	-0.230299	0.174213	0.210835	Kcna1	0.686041
1272	5086	P16390	SCN KI_vs_WT	-0.153683	0.298913	0.616492	Kcna3	0.929721
1273	5090	P16406	SCN KI_vs_WT	-0.0901432	0.0788	0.274719	Enpep	0.750697
1274	5094	P16460	SCN KI_vs_WT	0.0589731	0.123012	0.640265	Ass1	0.942238
1275	5098	P16546	SCN KI_vs_WT	-0.0452159	0.0292	0.147301	NA	0.60576
1276	5102	P16627	SCN KI_vs_WT	0.435273	0.262902	0.12369	Hspa1l	0.571933
1277	5106	P16675	SCN KI_vs_WT	0.0810878	0.0973	0.420872	Ctsa	0.838505
1278	5110	P16858	SCN KI_vs_WT	0.469561	0.606726	0.453952	Gapdh	0.854302
1279	5114	P16858;S4R1W1;Q64467	SCN KI_vs_WT	0.0319648	0.235518	0.894292	NA	1
1280	5118	P16951	SCN KI_vs_WT	-0.0382096	0.125485	0.765967	Atf2	1
1281	5122	P16951;Q8R0S1	SCN KI_vs_WT	0.268745	0.129101	0.0594477	NA	0.412582
1282	5126	P17012;P23607	SCN KI_vs_WT	-0.0304956	0.124991	0.815373	NA	1
1283	5130	P17047	SCN KI_vs_WT	0.149752	0.105165	0.179937	Lamp2	0.652171
1284	5134	P17095	SCN KI_vs_WT	0.0014916	0.183885	0.993661	Hmga1	1
1285	5138	P17156	SCN KI_vs_WT	0.0446585	0.0879	0.620545	Hspa2	0.931376
1286	5142	P17182	SCN KI_vs_WT	0.0423064	0.0578	0.478268	Eno1	0.865811
1287	5146	P17183	SCN KI_vs_WT	-0.0508714	0.0926	0.592883	Eno2	0.917719
1288	5150	P17225	SCN KI_vs_WT	0.0295968	0.0894	0.746429	NA	0.993645
1289	5154	P17426	SCN KI_vs_WT	-0.0410344	0.0642	0.534853	Ap2a1	0.890341
1290	5158	P17427	SCN KI_vs_WT	-0.0869454	0.039	0.0457472	Ap2a2	0.361741
1291	5162	P17439	SCN KI_vs_WT	-0.0925537	0.110931	0.420389	Gba1	0.838505
1292	5166	P17563	SCN KI_vs_WT	-0.101853	0.0911	0.285422	Selenbp1	0.757447
1293	5170	P17563;Q63836	SCN KI_vs_WT	-0.0690299	0.0449	0.150032	NA	0.610201
1294	5174	P17665	SCN KI_vs_WT	-0.125082	0.338152	0.717904	Cox7c	0.979464
1295	5178	P17710	SCN KI_vs_WT	0.00390542	0.0388	0.921393	Hk1	1
1296	5182	P17742	SCN KI_vs_WT	-0.0515592	0.0523	0.343247	Ppia	0.796572
1297	5186	P17751	SCN KI_vs_WT	0.100834	0.0397	0.0258712	Tpi1	0.265981
1298	5190	P17809	SCN KI_vs_WT	-0.0204712	0.237122	0.932626	Slc2a1	1
1299	5194	P17918	SCN KI_vs_WT	-0.0948003	0.0852	0.287857	Pcna	0.758522
1300	5198	P18052	SCN KI_vs_WT	-0.0902597	0.09	0.335931	Ptpra	0.791856
1301	5202	P18155	SCN KI_vs_WT	-0.0705453	0.14878	0.65215	Mthfd2	0.947342
1302	5206	P18242	SCN KI_vs_WT	0.0279309	0.0689	0.692416	Ctsd	0.966495
1303	5210	P18572	SCN KI_vs_WT	-0.0412885	0.0622	0.519462	Bsg	0.884733
1304	5214	P18581	SCN KI_vs_WT	-0.24387	0.173368	0.184894	Slc7a2	0.658898
1305	5218	P18608	SCN KI_vs_WT	-0.029527	0.249192	0.907815	Hmgn1	1
1306	5222	P18653	SCN KI_vs_WT	0.0302465	0.0702	0.674165	Rps6ka1	0.958055
1307	5226	P18654	SCN KI_vs_WT	0.0277837	0.0943	0.77335	Rps6ka3	1
1308	5230	P18760	SCN KI_vs_WT	-0.0710228	0.256684	0.786724	Cfl1	1
1309	5234	P18826	SCN KI_vs_WT	-0.0153828	0.0707	0.831398	Phka1	1
1310	5238	P18872	SCN KI_vs_WT	0.0340681	0.0679	0.624861	Gnao1	0.933963
1311	5242	P19091	SCN KI_vs_WT	-0.0417152	0.320189	0.900601	Ar	1
1312	5246	P19096	SCN KI_vs_WT	-0.0151823	0.0431	0.73094	Fasn	0.986347
1313	5250	P19137	SCN KI_vs_WT	-0.152295	0.112876	0.202171	Lama1	0.676413
1314	5254	P19157	SCN KI_vs_WT	0.0262007	0.0807	0.750902	Gstp1	0.995888
1315	5258	P19157;P46425	SCN KI_vs_WT	-0.0291587	0.137228	0.835297	NA	1
1316	5262	P19157;P46425;F6RWR5	SCN KI_vs_WT	-0.508653	0.603167	0.415552	NA	0.836282
1317	5266	P19221	SCN KI_vs_WT	0.101	0.184089	0.593309	F2	0.917902
1318	5270	P19246	SCN KI_vs_WT	-0.100048	0.175501	0.579147	Nefh	0.910554
1319	5274	P19253	SCN KI_vs_WT	0.0764273	0.0673	0.278298	Rpl13a	0.752792
1320	5278	P19258	SCN KI_vs_WT	0.187027	0.120815	0.14757	Mpv17	0.605942
1321	5282	P19324	SCN KI_vs_WT	0.0444971	0.145535	0.765035	Serpinh1	1
1322	5286	P19426	SCN KI_vs_WT	-0.0336068	0.0848	0.698812	Nelfe	0.969835
1323	5290	P19536	SCN KI_vs_WT	-0.00477408	0.111242	0.966474	NA	1
1324	5294	P19783	SCN KI_vs_WT	0.0514183	0.113732	0.659259	Cox4i1	0.950735
1325	5298	P19785	SCN KI_vs_WT	-0.0727631	0.204513	0.734174	Esr1	0.987972
1326	5302	P19973	SCN KI_vs_WT	0.29196	0.0796	0.0104591	Lsp1	0.150992
1327	5306	P20029	SCN KI_vs_WT	0.0128495	0.0503	0.802627	Hspa5	1
1328	5310	P20060	SCN KI_vs_WT	-0.0475295	0.0462	0.323649	Hexb	0.784583
1329	5314	P20065	SCN KI_vs_WT	0.106846	0.91105	0.90858	Tmsb4x	1
1330	5318	P20108	SCN KI_vs_WT	-0.0388954	0.0625	0.545319	Prdx3	0.894873
1331	5322	P20152	SCN KI_vs_WT	-0.0613283	0.116772	0.609014	Vim	0.924899
1332	5326	P20352	SCN KI_vs_WT	-0.0856082	0.0796	0.3031	F3	0.769881
1333	5330	P20357	SCN KI_vs_WT	-0.0208827	0.0869	0.814112	Map2	1
1334	5334	P20444	SCN KI_vs_WT	-0.0223536	0.0728	0.764074	Prkca	1
1335	5338	P20491	SCN KI_vs_WT	-0.0774478	0.173746	0.663711	Fcer1g	0.953347
1336	5342	P20917	SCN KI_vs_WT	-0.173279	0.203267	0.410646	Mag	0.835313
1337	5346	P20918	SCN KI_vs_WT	0.16944	0.169758	0.337919	Plg	0.793671
1338	5350	P20918;CON__P06868	SCN KI_vs_WT	0.146126	0.188791	0.468316	NA	0.8615
1339	5354	P21107	SCN KI_vs_WT	0.0720703	0.210397	0.737866	Tpm3	0.989349
1340	5358	P21126	SCN KI_vs_WT	0.0571787	0.0729	0.447758	Ubl4a	0.849967
1341	5362	P21237	SCN KI_vs_WT	-0.0761162	0.100945	0.465367	Bdnf	0.860174
1342	5366	P21271	SCN KI_vs_WT	-0.0908816	0.135489	0.515073	NA	0.8827
1343	5370	P21278	SCN KI_vs_WT	0.0383336	0.0428	0.388372	Gna11	0.82338
1344	5374	P21279	SCN KI_vs_WT	0.121371	0.0769	0.140503	Gnaq	0.594913
1345	5378	P21447	SCN KI_vs_WT	-0.00482737	0.0652	0.942241	Abcb1a	1
1346	5382	P21447;B5X0E4	SCN KI_vs_WT	0.121217	0.167105	0.495518	NA	0.873539
1347	5386	P21447;P06795	SCN KI_vs_WT	0.017695	0.0838	0.836279	NA	1
1348	5390	P21460	SCN KI_vs_WT	0.0437631	0.074	0.565417	Cst3	0.904693
1349	5394	P21550	SCN KI_vs_WT	0.551361	0.276625	0.0694818	Eno3	0.447484
1350	5398	P21614	SCN KI_vs_WT	0.14596	0.162525	0.386808	Gc	0.822402
1351	5402	P21619	SCN KI_vs_WT	0.0280211	0.0664	0.680608	Lmnb2	0.960414
1352	5406	P21661	SCN KI_vs_WT	0.0587621	0.0815	0.484627	Pcsk2	0.869065
1353	5410	P21836	SCN KI_vs_WT	-0.152503	0.092	0.123458	Ache	0.571744
1354	5414	P21956	SCN KI_vs_WT	0.0307541	0.0831	0.717914	Mfge8	0.979464
1355	5418	P21981	SCN KI_vs_WT	-0.0451631	0.131195	0.73662	Tgm2	0.988868
1356	5422	P21995	SCN KI_vs_WT	0.0231956	0.10187	0.823714	Emb	1
1357	5426	P22005	SCN KI_vs_WT	0.327904	0.336267	0.348743	Penk	0.799713
1358	5430	P22315	SCN KI_vs_WT	0.0169132	0.0571	0.772096	NA	1
1359	5434	P22366	SCN KI_vs_WT	0.165657	0.162944	0.329379	Myd88	0.788393
1360	5438	P22437	SCN KI_vs_WT	-0.0566407	0.0903	0.542235	Ptgs1	0.893591
1361	5442	P22599	SCN KI_vs_WT	0.308167	0.207783	0.163825	Serpina1b	0.630316
1362	5446	P22682	SCN KI_vs_WT	0.0456008	0.0674	0.511591	Cbl	0.881013
1363	5450	P22723	SCN KI_vs_WT	-0.0598982	0.107652	0.58816	Gabrg2	0.915268
1364	5454	P22892	SCN KI_vs_WT	0.0616815	0.0659	0.367895	Ap1g1	0.81286
1365	5458	P22892;O88512	SCN KI_vs_WT	-0.135037	0.0971	0.189723	NA	0.662927
1366	5462	P22907	SCN KI_vs_WT	0.0977959	0.0789	0.238728	Hmbs	0.71724
1367	5466	P22933	SCN KI_vs_WT	NA	NA	NA	Gabrd	NA
1368	5470	P23116	SCN KI_vs_WT	0.0125208	0.0296	0.679852	Eif3a	0.960087
1369	5474	P23198	SCN KI_vs_WT	-0.0365544	0.0753	0.636186	NA	0.939799
1370	5478	P23242	SCN KI_vs_WT	-0.0784533	0.089	0.395248	Gja1	0.826979
1371	5482	P23249	SCN KI_vs_WT	-0.00276553	0.296772	0.992718	Mov10	1
1372	5486	P23475	SCN KI_vs_WT	-0.0902692	0.082	0.292342	Xrcc6	0.760659
1373	5490	P23492	SCN KI_vs_WT	0.080067	0.125129	0.53428	Pnp	0.890304
1374	5494	P23506	SCN KI_vs_WT	0.108976	0.0569	0.0795595	NA	0.47657
1375	5498	P23591	SCN KI_vs_WT	0.0373454	0.0473	0.445537	Gfus	0.848574
1376	5502	P23780	SCN KI_vs_WT	-0.172316	0.0952	0.0953603	Glb1	0.516325
1377	5506	P23780;Q8VC60	SCN KI_vs_WT	NA	NA	NA	NA	NA
1378	5510	P23798	SCN KI_vs_WT	0.361223	0.163146	0.0469323	Pcgf2	0.366745
1379	5514	P23818	SCN KI_vs_WT	-0.0563935	0.097	0.571751	Gria1	0.907723
1380	5518	P23819	SCN KI_vs_WT	-0.0630824	0.0455	0.190774	Gria2	0.663682
1381	5522	P23927	SCN KI_vs_WT	-0.12281	0.121693	0.332803	Cryab	0.78968
1382	5526	P23953	SCN KI_vs_WT	0.0794143	0.219444	0.723728	Ces1c	0.981948
1383	5530	P23953;D3Z5G7	SCN KI_vs_WT	0.177267	0.26637	0.518325	NA	0.884141
1384	5534	P24063	SCN KI_vs_WT	-0.449543	0.508042	0.393621	NA	0.826211
1385	5538	P24270	SCN KI_vs_WT	0.0734707	0.0754	0.348947	Cat	0.800024
1386	5542	P24288	SCN KI_vs_WT	-0.0345181	0.0693	0.627475	Bcat1	0.935301
1387	5546	P24369	SCN KI_vs_WT	0.0143606	0.0776	0.856184	Ppib	1
1388	5550	P24452	SCN KI_vs_WT	0.196066	0.163221	0.252835	NA	0.730006
1389	5554	P24472	SCN KI_vs_WT	0.0146116	0.0723	0.843305	Gsta4	1
1390	5558	P24472;P30115;P13745;Q6P8Q0	SCN KI_vs_WT	0.095905	0.110314	0.401692	NA	0.830528
1391	5562	P24527	SCN KI_vs_WT	0.0218764	0.0482	0.658293	Lta4h	0.949956
1392	5566	P24529	SCN KI_vs_WT	-0.0274981	0.138835	0.846311	Th	1
1393	5570	P24547	SCN KI_vs_WT	0.0343885	0.0449	0.458791	Impdh2	0.85609
1394	5574	P24549	SCN KI_vs_WT	-0.209576	0.13855	0.156254	Aldh1a1	0.618356
1395	5578	P24638	SCN KI_vs_WT	-0.0917522	0.0541	0.115582	Acp2	0.558756
1396	5582	P24668	SCN KI_vs_WT	-0.0132145	0.0463	0.780066	M6pr	1
1397	5586	P24788	SCN KI_vs_WT	-0.00299001	0.0593	0.960637	Cdk11b	1
1398	5590	P24788;Q64434	SCN KI_vs_WT	0.193155	0.073	0.0382096	NA	0.330009
1399	5594	P25233	SCN KI_vs_WT	0.336512	0.131448	0.0249994	Ndn	0.26068
1400	5598	P25444	SCN KI_vs_WT	0.00629975	0.0842	0.941574	Rps2	1
1401	5602	P25446	SCN KI_vs_WT	0.11747	0.0392	0.0239926	Fas	0.254426
1402	5606	P25785	SCN KI_vs_WT	0.135853	0.236564	0.576388	NA	0.909986
1403	5610	P25799	SCN KI_vs_WT	-0.10195	0.0948	0.303247	Nfkb1	0.769919
1404	5614	P25911	SCN KI_vs_WT	0.116057	0.0534	0.0505567	Lyn	0.380156
1405	5618	P25911;P16277	SCN KI_vs_WT	0.063282	0.148957	0.678475	NA	0.959106
1406	5622	P25976	SCN KI_vs_WT	-0.0358261	0.0637	0.584252	NA	0.913149
1407	5626	P26039	SCN KI_vs_WT	0.00115795	0.0514	0.982381	Tln1	1
1408	5630	P26040	SCN KI_vs_WT	0.169827	0.127169	0.206509	Ezr	0.681457
1409	5634	P26041	SCN KI_vs_WT	0.027495	0.0778	0.729787	Msn	0.985731
1410	5638	P26043	SCN KI_vs_WT	-0.0201851	0.0394	0.618026	Rdx	0.930175
1411	5642	P26048	SCN KI_vs_WT	0.400784	0.206561	0.0762084	Gabra2	0.467934
1412	5646	P26049	SCN KI_vs_WT	-0.266654	0.134467	0.0707257	Gabra3	0.451636
1413	5650	P26187	SCN KI_vs_WT	0.609079	0.343137	0.126241	Mgmt	0.576161
1414	5654	P26231	SCN KI_vs_WT	0.00360487	0.0697	0.959575	Ctnna1	1
1415	5658	P26262	SCN KI_vs_WT	0.456929	0.0912	0.00243161	Klkb1	0.0558243
1416	5662	P26339	SCN KI_vs_WT	-0.00416938	0.166338	0.980415	Chga	1
1417	5666	P26350	SCN KI_vs_WT	0.0900382	0.298184	0.767856	Ptma	1
1418	5670	P26369	SCN KI_vs_WT	-0.0947983	0.112459	0.415738	U2af2	0.836375
1419	5674	P26443	SCN KI_vs_WT	-0.0615368	0.0474	0.218868	Glud1	0.695226
1420	5678	P26450	SCN KI_vs_WT	-0.0656071	0.0521	0.231644	Pik3r1	0.708179
1421	5682	P26516	SCN KI_vs_WT	-0.0770742	0.0883	0.399616	Psmd7	0.829537
1422	5686	P26618	SCN KI_vs_WT	0.00545248	0.115008	0.962967	Pdgfra	1
1423	5690	P26638	SCN KI_vs_WT	-0.0105464	0.0608	0.865087	Sars1	1
1424	5694	P26645	SCN KI_vs_WT	0.043873	0.491952	0.930409	Marcks	1
1425	5698	P26883	SCN KI_vs_WT	0.0100831	0.10925	0.927988	Fkbp1a	1
1426	5702	P27038	SCN KI_vs_WT	-0.0700337	0.217624	0.753132	Acvr2a	0.996925
1427	5706	P27048;P63163	SCN KI_vs_WT	0.00678137	0.0837	0.936773	NA	1
1428	5710	P27545	SCN KI_vs_WT	-0.318918	0.365705	0.400287	Cers1	0.830157
1429	5714	P27546	SCN KI_vs_WT	-0.0222499	0.100023	0.827706	Map4	1
1430	5718	P27600	SCN KI_vs_WT	0.0112244	0.0644	0.864528	Gna12	1
1431	5722	P27601	SCN KI_vs_WT	0.0347738	0.064	0.596991	Gna13	0.919198
1432	5726	P27612	SCN KI_vs_WT	0.00638854	0.0479	0.896166	Plaa	1
1433	5730	P27641	SCN KI_vs_WT	-0.0924707	0.140487	0.522828	Xrcc5	0.885802
1434	5734	P27659	SCN KI_vs_WT	-0.0189185	0.0684	0.786749	Rpl3	1
1435	5738	P27659;E9PWZ3	SCN KI_vs_WT	0.123524	0.162827	0.462719	NA	0.858678
1436	5742	P27661	SCN KI_vs_WT	-0.0149864	0.501542	0.977131	H2ax	1
1437	5746	P27671	SCN KI_vs_WT	0.0225465	0.0558	0.693514	Rasgrf1	0.967132
1438	5750	P27681	SCN KI_vs_WT	0.0320647	0.0931	0.74233	Gabrg3	0.991631
1439	5754	P27773	SCN KI_vs_WT	-0.0217497	0.0509	0.676863	Pdia3	0.958804
1440	5758	P27808	SCN KI_vs_WT	-0.0195385	0.153926	0.903139	Mgat1	1
1441	5762	P28028	SCN KI_vs_WT	-0.025795	0.0719	0.726146	Braf	0.983339
1442	5766	P28063	SCN KI_vs_WT	0.0095939	0.124044	0.939625	Psmb8	1
1443	5770	P28271	SCN KI_vs_WT	-0.0083404	0.0611	0.893666	Aco1	1
1444	5774	P28334	SCN KI_vs_WT	-0.00171556	0.102643	0.98694	Htr1b	1
1445	5778	P28352	SCN KI_vs_WT	-0.0274561	0.089	0.763092	Apex1	1
1446	5782	P28474	SCN KI_vs_WT	0.0860483	0.0741	0.268011	Adh5	0.745011
1447	5786	P28474;Q64437	SCN KI_vs_WT	-0.0364144	0.278952	0.898302	NA	1
1448	5790	P28571	SCN KI_vs_WT	-0.14248	0.0717	0.0703849	Slc6a9	0.451089
1449	5794	P28574	SCN KI_vs_WT	0.0776452	0.101138	0.457496	NA	0.856016
1450	5798	P28650	SCN KI_vs_WT	-0.013778	0.140555	0.92353	Adss1	1
1451	5802	P28651	SCN KI_vs_WT	0.00739746	0.149241	0.961283	Car8	1
1452	5806	P28652	SCN KI_vs_WT	-0.142363	0.0737	0.077268	Camk2b	0.469871
1453	5810	P28653	SCN KI_vs_WT	-0.543985	0.257529	0.0562982	Bgn	0.401044
1454	5814	P28654	SCN KI_vs_WT	0.0386819	0.149783	0.804842	Dcn	1
1455	5818	P28656	SCN KI_vs_WT	-0.256473	0.118787	0.0517943	Nap1l1	0.384719
1456	5822	P28658	SCN KI_vs_WT	-0.0488158	0.119191	0.689347	Atxn10	0.964577
1457	5826	P28659	SCN KI_vs_WT	0.0524225	0.0605	0.403571	Celf1	0.831488
1458	5830	P28660	SCN KI_vs_WT	-0.0330123	0.0277	0.25659	Nckap1	0.733991
1459	5834	P28661	SCN KI_vs_WT	-0.00182679	0.114192	0.987499	Septin4	1
1460	5838	P28663	SCN KI_vs_WT	-0.034374	0.119292	0.778148	Napb	1
1461	5842	P28665	SCN KI_vs_WT	0.257546	0.356839	0.484279	Mug1	0.869065
1462	5846	P28665;A0A0N4SVU1	SCN KI_vs_WT	0.366801	0.294304	0.236424	NA	0.714069
1463	5850	P28665;P28666	SCN KI_vs_WT	0.239427	0.353403	0.510947	NA	0.880817
1464	5854	P28665;P28666;A0A0N4SVU1	SCN KI_vs_WT	0.120735	0.424352	0.780864	NA	1
1465	5858	P28667	SCN KI_vs_WT	-0.0113374	0.254249	0.965166	Marcksl1	1
1466	5862	P28700	SCN KI_vs_WT	-0.0644869	0.311583	0.839507	Rxra	1
1467	5866	P28700;P28705	SCN KI_vs_WT	0.134896	0.236192	0.58865	NA	0.915473
1468	5870	P28704	SCN KI_vs_WT	0.0857948	0.149692	0.577131	Rxrb	0.909986
1469	5874	P28738	SCN KI_vs_WT	0.102903	0.0341	0.0107372	Kif5c	0.153768
1470	5878	P28740	SCN KI_vs_WT	-0.0281523	0.0483	0.57094	Kif2a	0.907491
1471	5882	P28740;Q8C0N1	SCN KI_vs_WT	0.126101	0.199112	0.549888	NA	0.896531
1472	5886	P28740;Q922S8	SCN KI_vs_WT	0.116007	0.0811	0.177999	NA	0.648815
1473	5890	P28741	SCN KI_vs_WT	-0.01415	0.0873	0.873998	Kif3a	1
1474	5894	P28741;P33174;E9PX57	SCN KI_vs_WT	-0.267763	0.11052	0.0321546	NA	0.30177
1475	5898	P28828	SCN KI_vs_WT	0.0398254	0.0963	0.686447	Ptprm	0.963141
1476	5902	P28843	SCN KI_vs_WT	-0.176787	0.243274	0.481346	Dpp4	0.867638
1477	5906	P28867	SCN KI_vs_WT	-0.0970928	0.197439	0.63176	Prkcd	0.937587
1478	5910	P29341	SCN KI_vs_WT	0.051187	0.0699	0.477907	Pabpc1	0.865499
1479	5914	P29341;A2A5N3	SCN KI_vs_WT	-0.106328	0.220017	0.637601	NA	0.940844
1480	5918	P29341;Q8C7D3	SCN KI_vs_WT	0.053028	0.0814	0.52704	NA	0.886648
1481	5922	P29341;Q9D4E6	SCN KI_vs_WT	-0.00615557	0.104144	0.95384	NA	1
1482	5926	P29351	SCN KI_vs_WT	-0.166754	0.0696	0.0337546	Ptpn6	0.309417
1483	5930	P29387	SCN KI_vs_WT	0.0969646	0.0818	0.258587	Gnb4	0.735422
1484	5934	P29391	SCN KI_vs_WT	-0.251213	0.28576	0.396607	NA	0.827431
1485	5938	P29391;P49945	SCN KI_vs_WT	-0.213455	0.317122	0.513637	NA	0.882271
1486	5942	P29416	SCN KI_vs_WT	0.0555751	0.0745	0.469934	Hexa	0.862189
1487	5946	P29533	SCN KI_vs_WT	-0.105509	0.0307	0.00493447	NA	0.0929848
1488	5950	P29595	SCN KI_vs_WT	0.719003	0.793066	0.382456	Nedd8	0.820366
1489	5954	P29699	SCN KI_vs_WT	0.0645599	0.192925	0.743675	Ahsg	0.992345
1490	5958	P29758	SCN KI_vs_WT	-0.0359433	0.0479	0.467425	Oat	0.861176
1491	5962	P29788	SCN KI_vs_WT	0.329643	0.176205	0.0859509	Vtn	0.49331
1492	5966	P30051	SCN KI_vs_WT	-0.333026	0.374183	0.407728	Tead1	0.834165
1493	5970	P30051;P70210;Q62296	SCN KI_vs_WT	-0.137138	0.73475	0.855057	NA	1
1494	5974	P30275	SCN KI_vs_WT	-0.0122316	0.0407	0.768979	Ckmt1	1
1495	5978	P30285	SCN KI_vs_WT	-0.237242	0.209649	0.279905	Cdk4	0.754181
1496	5982	P30416	SCN KI_vs_WT	0.0730498	0.105792	0.503017	Fkbp4	0.876372
1497	5986	P30548	SCN KI_vs_WT	-0.0825637	0.148722	0.598861	Tacr1	0.919943
1498	5990	P30677	SCN KI_vs_WT	0.529	0.394786	0.205078	Gna14	0.679718
1499	5994	P30681	SCN KI_vs_WT	-0.0257819	0.21793	0.907784	Hmgb2	1
1500	5998	P30999	SCN KI_vs_WT	0.0356183	0.0707	0.623316	Ctnnd1	0.932777
1501	6002	P31001	SCN KI_vs_WT	0.0371164	0.103823	0.726928	Des	0.983982
1502	6006	P31230	SCN KI_vs_WT	0.0172154	0.0413	0.684016	NA	0.961869
1503	6010	P31254	SCN KI_vs_WT	NA	NA	NA	NA	NA
1504	6014	P31266	SCN KI_vs_WT	-0.0881466	0.112028	0.461321	Rbpj	0.857804
1505	6018	P31324	SCN KI_vs_WT	-0.124592	0.0405	0.00964894	Prkar2b	0.143335
1506	6022	P31360;P31361;P21952	SCN KI_vs_WT	0.15761	0.216102	0.479792	NA	0.866945
1507	6026	P31360;P31361;P62515	SCN KI_vs_WT	-0.104344	0.102412	0.347578	NA	0.798886
1508	6030	P31532	SCN KI_vs_WT	0.177055	0.300228	0.576885	Saa4	0.909986
1509	6034	P31648	SCN KI_vs_WT	-0.268925	0.188792	0.179798	Slc6a1	0.652171
1510	6038	P31649	SCN KI_vs_WT	NA	NA	NA	Slc6a13	NA
1511	6042	P31650	SCN KI_vs_WT	-0.0369663	0.110336	0.743384	Slc6a11	0.992248
1512	6046	P31750	SCN KI_vs_WT	-0.00367023	0.111662	0.974319	Akt1	1
1513	6050	P31786	SCN KI_vs_WT	-0.0504128	0.150221	0.742973	Dbi	0.991978
1514	6054	P31938	SCN KI_vs_WT	-0.0890417	0.0638	0.188151	Map2k1	0.661552
1515	6058	P31996	SCN KI_vs_WT	NA	NA	NA	Cd68	NA
1516	6062	P32020	SCN KI_vs_WT	0.0428897	0.0524	0.429302	Scp2	0.842417
1517	6066	P32037	SCN KI_vs_WT	-0.0637431	0.0827	0.455535	Slc2a3	0.855076
1518	6070	P32067	SCN KI_vs_WT	0.0184251	0.181573	0.920849	Ssb	1
1519	6074	P32114	SCN KI_vs_WT	-0.159698	0.185757	0.406794	Pax2	0.833245
1520	6078	P32211	SCN KI_vs_WT	-0.172178	0.237472	0.482323	Chrm4	0.868116
1521	6082	P32233	SCN KI_vs_WT	-0.00912138	0.0529	0.866005	Drg1	1
1522	6086	P32261	SCN KI_vs_WT	-0.0878169	0.213211	0.687691	Serpinc1	0.963831
1523	6090	P32261;CON__P41361	SCN KI_vs_WT	0.205078	0.215212	0.359436	NA	0.807656
1524	6094	P32507	SCN KI_vs_WT	0.013767	0.101508	0.894367	Nectin2	1
1525	6098	P32648	SCN KI_vs_WT	0.194813	0.158327	0.242105	Vip	0.720086
1526	6102	P32848	SCN KI_vs_WT	0.282228	0.276738	0.327927	Pvalb	0.786983
1527	6106	P32883	SCN KI_vs_WT	0.139313	0.105177	0.209991	Kras	0.684779
1528	6110	P32921	SCN KI_vs_WT	-0.0715734	0.0775	0.374193	Wars1	0.816328
1529	6114	P33173	SCN KI_vs_WT	-0.0831283	0.0448	0.088264	NA	0.49937
1530	6118	P33175	SCN KI_vs_WT	0.0188332	0.0293	0.53304	Kif5a	0.889755
1531	6122	P33622	SCN KI_vs_WT	0.190094	0.264622	0.486288	Apoc3	0.869134
1532	6126	P34022	SCN KI_vs_WT	0.0835118	0.0795	0.31396	Ranbp1	0.778119
1533	6130	P34152	SCN KI_vs_WT	-0.00571296	0.0436	0.897942	Ptk2	1
1534	6134	P34884	SCN KI_vs_WT	-0.0918241	0.0963	0.359207	Mif	0.807448
1535	6138	P34914	SCN KI_vs_WT	0.0173897	0.0288	0.557682	Ephx2	0.900413
1536	6142	P34928	SCN KI_vs_WT	0.290963	0.486342	0.560784	Apoc1	0.902145
1537	6146	P35123	SCN KI_vs_WT	-0.0476611	0.059	0.434731	Usp4	0.844572
1538	6150	P35235	SCN KI_vs_WT	0.0773381	0.0336	0.0402739	Ptpn11	0.339229
1539	6154	P35278	SCN KI_vs_WT	-0.0190584	0.123346	0.879775	Rab5c	1
1540	6158	P35279	SCN KI_vs_WT	0.0570561	0.0387	0.166115	Rab6a	0.63347
1541	6162	P35282	SCN KI_vs_WT	-0.0656855	0.059	0.287463	Rab21	0.758522
1542	6166	P35283	SCN KI_vs_WT	0.00826651	0.0579	0.888793	Rab12	1
1543	6170	P35285	SCN KI_vs_WT	0.0158866	0.0818	0.849167	Rab22a	1
1544	6174	P35288	SCN KI_vs_WT	-0.0195326	0.241144	0.936777	NA	1
1545	6178	P35290	SCN KI_vs_WT	-0.118553	0.0658	0.0969192	Rab24	0.51951
1546	6182	P35293	SCN KI_vs_WT	-0.0751419	0.0808	0.370564	Rab18	0.814057
1547	6186	P35330	SCN KI_vs_WT	NA	NA	NA	Icam2	NA
1548	6190	P35347	SCN KI_vs_WT	0.288219	0.214816	0.204532	Crhr1	0.678964
1549	6194	P35436	SCN KI_vs_WT	-0.0414431	0.101519	0.690295	Grin2a	0.965143
1550	6198	P35438	SCN KI_vs_WT	-0.00791942	0.0422	0.85444	Grin1	1
1551	6202	P35441	SCN KI_vs_WT	0.0465946	0.207872	0.826411	NA	1
1552	6206	P35441;CON__Q28194	SCN KI_vs_WT	-0.0582867	0.111665	0.620387	NA	0.931376
1553	6210	P35454	SCN KI_vs_WT	0.153415	0.334668	0.654849	Oxt	0.948352
1554	6214	P35455	SCN KI_vs_WT	0.439536	0.262165	0.119464	Avp	0.563982
1555	6218	P35486	SCN KI_vs_WT	0.0764133	0.0634	0.251388	Pdha1	0.728624
1556	6222	P35486;P35487	SCN KI_vs_WT	NA	NA	NA	NA	NA
1557	6226	P35505	SCN KI_vs_WT	0.171372	0.0941	0.0936308	Fah	0.513092
1558	6230	P35546	SCN KI_vs_WT	0.0278767	0.137714	0.846274	Ret	1
1559	6234	P35550	SCN KI_vs_WT	0.0511529	0.0806	0.537707	Fbl	0.891496
1560	6238	P35564	SCN KI_vs_WT	-0.0172734	0.18856	0.928522	Canx	1
1561	6242	P35569	SCN KI_vs_WT	-0.0491279	0.247018	0.845683	Irs1	1
1562	6246	P35585	SCN KI_vs_WT	-0.0072446	0.0553	0.897854	Ap1m1	1
1563	6250	P35585;Q9WVP1	SCN KI_vs_WT	-0.190871	0.082	0.038261	NA	0.330135
1564	6254	P35601	SCN KI_vs_WT	NA	NA	NA	Rfc1	NA
1565	6258	P35700	SCN KI_vs_WT	0.0748215	0.0444	0.117968	Prdx1	0.561478
1566	6262	P35762	SCN KI_vs_WT	-0.317932	0.140615	0.0431327	Cd81	0.350973
1567	6266	P35802	SCN KI_vs_WT	0.0167526	0.150505	0.913211	Gpm6a	1
1568	6270	P35803	SCN KI_vs_WT	0.0125219	0.0861	0.886757	Gpm6b	1
1569	6274	P35821	SCN KI_vs_WT	0.0281489	0.061	0.652872	Ptpn1	0.947655
1570	6278	P35822	SCN KI_vs_WT	0.0885302	0.0568	0.145365	Ptprk	0.602849
1571	6282	P35831	SCN KI_vs_WT	0.0934935	0.0521	0.0978095	Ptpn12	0.521118
1572	6286	P35922	SCN KI_vs_WT	0.0614001	0.0952	0.531036	NA	0.888492
1573	6290	P35951	SCN KI_vs_WT	-0.0201724	0.0987	0.841546	Ldlr	1
1574	6294	P35979	SCN KI_vs_WT	-0.102307	0.112486	0.380987	Rpl12	0.819895
1575	6298	P35980	SCN KI_vs_WT	-0.00931337	0.0613	0.881789	Rpl18	1
1576	6302	P36371	SCN KI_vs_WT	-0.0630406	0.132712	0.651573	Tap2	0.947342
1577	6306	P36536	SCN KI_vs_WT	0.0597832	0.350045	0.867237	NA	1
1578	6310	P36552	SCN KI_vs_WT	-0.0106327	0.0719	0.884911	Cpox	1
1579	6314	P36895	SCN KI_vs_WT	-0.357723	0.221852	0.135162	Bmpr1a	0.588917
1580	6318	P36898	SCN KI_vs_WT	0.171389	0.0768	0.067072	Bmpr1b	0.439303
1581	6322	P36916	SCN KI_vs_WT	0.00611817	0.0344	0.861692	Gnl1	1
1582	6326	P36993	SCN KI_vs_WT	-0.0193413	0.111223	0.864845	Ppm1b	1
1583	6330	P37040	SCN KI_vs_WT	0.0878672	0.0276	0.00791695	Por	0.126242
1584	6334	P37172	SCN KI_vs_WT	-0.224611	0.099	0.0425014	Acvr1	0.348107
1585	6338	P37804	SCN KI_vs_WT	-0.197663	0.291403	0.510441	Tagln	0.880741
1586	6342	P38060	SCN KI_vs_WT	0.0316495	0.101531	0.7606	Hmgcl	1
1587	6346	P38532	SCN KI_vs_WT	-0.045749	0.103571	0.666549	Hsf1	0.954494
1588	6350	P38585	SCN KI_vs_WT	0.0219643	0.122275	0.86044	Ttl	1
1589	6354	P38647	SCN KI_vs_WT	-0.0302216	0.0774	0.702941	Hspa9	0.971845
1590	6358	P39038	SCN KI_vs_WT	0.0565364	0.059	0.35716	Cdh4	0.805963
1591	6362	P39053	SCN KI_vs_WT	-0.0440611	0.0606	0.481449	Dnm1	0.867678
1592	6366	P39054	SCN KI_vs_WT	-0.0426965	0.055	0.452839	Dnm2	0.85346
1593	6370	P39061	SCN KI_vs_WT	-0.1653	0.213793	0.454379	Col18a1	0.854432
1594	6374	P39087	SCN KI_vs_WT	-0.0189102	0.0544	0.734101	NA	0.987972
1595	6378	P39098	SCN KI_vs_WT	-0.159724	0.14127	0.280301	Man1a2	0.754228
1596	6382	P39429	SCN KI_vs_WT	0.112704	0.179818	0.542552	Traf2	0.893685
1597	6386	P39447	SCN KI_vs_WT	-0.0499064	0.0539	0.373019	Tjp1	0.815456
1598	6390	P39688	SCN KI_vs_WT	-0.0097652	0.0675	0.887323	Fyn	1
1599	6394	P39688;P14234	SCN KI_vs_WT	-0.0185979	0.287768	0.949534	NA	1
1600	6398	P39749	SCN KI_vs_WT	-0.0332111	0.0919	0.724223	NA	0.982062
1601	6402	P39876	SCN KI_vs_WT	NA	NA	NA	Timp3	NA
1602	6406	P40124	SCN KI_vs_WT	0.0223025	0.047	0.643501	Cap1	0.943546
1603	6410	P40142	SCN KI_vs_WT	0.0214271	0.0314	0.50771	Tkt	0.878827
1604	6414	P40224	SCN KI_vs_WT	0.0332915	0.148893	0.830492	Cxcl12	1
1605	6418	P40237	SCN KI_vs_WT	-0.0101914	0.162308	0.950967	Cd82	1
1606	6422	P40240	SCN KI_vs_WT	-0.621845	0.488108	0.226788	Cd9	0.702782
1607	6426	P40336	SCN KI_vs_WT	-0.082479	0.0811	0.328933	Vps26a	0.788037
1608	6430	P40338	SCN KI_vs_WT	-0.00184522	0.119029	0.987886	Vhl	1
1609	6434	P40630	SCN KI_vs_WT	0.0532561	0.0572	0.370041	Tfam	0.813874
1610	6438	P40694	SCN KI_vs_WT	0.289996	0.162963	0.100471	NA	0.527133
1611	6442	P40749	SCN KI_vs_WT	0.0046881	0.104135	0.964832	Syt4	1
1612	6446	P40936	SCN KI_vs_WT	-0.26006	0.26382	0.343714	Inmt	0.796572
1613	6450	P41105	SCN KI_vs_WT	0.110017	0.07	0.14205	Rpl28	0.597036
1614	6454	P41216	SCN KI_vs_WT	0.0295529	0.0593	0.627374	Acsl1	0.935301
1615	6458	P41233	SCN KI_vs_WT	-0.0846349	0.0822	0.323486	Abca1	0.784488
1616	6462	P41234	SCN KI_vs_WT	-0.0617809	0.0761	0.432902	NA	0.843929
1617	6466	P41241	SCN KI_vs_WT	0.0331082	0.0546	0.555233	Csk	0.899307
1618	6470	P41242	SCN KI_vs_WT	-0.00160041	0.0455	0.972525	Matk	1
1619	6474	P41317	SCN KI_vs_WT	0.0497467	0.158923	0.759635	Mbl2	1
1620	6478	P41438	SCN KI_vs_WT	-0.185449	0.46636	0.69787	Slc19a1	0.969459
1621	6482	P41539	SCN KI_vs_WT	0.104608	0.184394	0.580966	Tac1	0.911248
1622	6486	P41588	SCN KI_vs_WT	0.142769	0.2564	0.59779	Vipr2	0.919359
1623	6490	P41731	SCN KI_vs_WT	-0.0608067	0.26451	0.822054	Cd63	1
1624	6494	P41778	SCN KI_vs_WT	0.121434	0.349506	0.734274	Pbx1	0.988062
1625	6498	P41778;O35984	SCN KI_vs_WT	0.224416	0.151847	0.189905	NA	0.66295
1626	6502	P41969	SCN KI_vs_WT	-0.167356	0.374881	0.663239	Elk1	0.953058
1627	6506	P42125	SCN KI_vs_WT	0.0962408	0.0691	0.188919	Eci1	0.662569
1628	6510	P42128	SCN KI_vs_WT	-0.0828338	0.0737	0.283095	Foxk1	0.756153
1629	6514	P42208	SCN KI_vs_WT	-0.0736812	0.0475	0.146565	Septin2	0.604698
1630	6518	P42225	SCN KI_vs_WT	-0.073859	0.0713	0.320412	NA	0.782908
1631	6522	P42227	SCN KI_vs_WT	-0.0125569	0.0513	0.810844	Stat3	1
1632	6526	P42230	SCN KI_vs_WT	-0.195673	0.216152	0.400218	Stat5a	0.830112
1633	6530	P42232	SCN KI_vs_WT	-0.0760224	0.136346	0.587389	Stat5b	0.915052
1634	6534	P42337	SCN KI_vs_WT	0.00785864	0.094	0.934759	Pik3ca	1
1635	6538	P42567	SCN KI_vs_WT	-0.0938309	0.154907	0.555981	Eps15	0.899838
1636	6542	P42669	SCN KI_vs_WT	0.0278048	0.141877	0.847906	Pura	1
1637	6546	P42703	SCN KI_vs_WT	-0.0677376	0.114207	0.564116	Lifr	0.904055
1638	6550	P42859	SCN KI_vs_WT	-0.0689776	0.0497	0.190234	NA	0.663342
1639	6554	P42866	SCN KI_vs_WT	-0.114938	0.193837	0.567805	Oprm1	0.905841
1640	6558	P42867	SCN KI_vs_WT	0.965048	0.851077	0.278976	Dpagt1	0.753488
1641	6562	P42925	SCN KI_vs_WT	0.0870306	0.276544	0.758388	Pxmp2	1
1642	6566	P42932	SCN KI_vs_WT	0.0311963	0.0453	0.503787	Cct8	0.876556
1643	6570	P43006	SCN KI_vs_WT	0.00834933	0.0846	0.922981	Slc1a2	1
1644	6574	P43024	SCN KI_vs_WT	-0.0157349	0.168219	0.927019	Cox6a1	1
1645	6578	P43135;Q60632	SCN KI_vs_WT	-0.0198267	0.0755	0.797385	NA	1
1646	6582	P43136	SCN KI_vs_WT	-0.127068	0.521266	0.817096	Nr2f6	1
1647	6586	P43247	SCN KI_vs_WT	-0.0770351	0.0901	0.409062	Msh2	0.834744
1648	6590	P43274	SCN KI_vs_WT	-0.0570314	0.086	0.519888	H1f4	0.885029
1649	6594	P43275	SCN KI_vs_WT	0.00885422	0.113292	0.938994	H1f1	1
1650	6598	P43276	SCN KI_vs_WT	-0.152038	0.125684	0.249693	H1f5	0.727113
1651	6602	P43277	SCN KI_vs_WT	-0.313685	0.148035	0.0556351	H1f3	0.398816
1652	6606	P43300	SCN KI_vs_WT	NA	NA	NA	Egr3	NA
1653	6610	P43346	SCN KI_vs_WT	-0.175373	0.170817	0.344174	Dck	0.796931
1654	6614	P43406	SCN KI_vs_WT	-0.0768364	0.0403	0.0805164	Itgav	0.478349
1655	6618	P43407	SCN KI_vs_WT	-0.495287	0.35628	0.189727	Sdc2	0.662927
1656	6622	P45376	SCN KI_vs_WT	0.068252	0.0494	0.192263	Akr1b1	0.665363
1657	6626	P45481	SCN KI_vs_WT	0.146246	0.149649	0.347731	NA	0.798886
1658	6630	P45591	SCN KI_vs_WT	0.0444689	0.0757	0.567858	Cfl2	0.905885
1659	6634	P45878	SCN KI_vs_WT	-0.105481	0.121648	0.402893	Fkbp2	0.831189
1660	6638	P45952	SCN KI_vs_WT	-0.0158948	0.0456	0.733255	Acadm	0.987402
1661	6642	P46061	SCN KI_vs_WT	-0.0383763	0.0486	0.445049	Rangap1	0.848035
1662	6646	P46096	SCN KI_vs_WT	-0.107834	0.174104	0.547253	Syt1	0.895564
1663	6650	P46097	SCN KI_vs_WT	-0.248247	0.195909	0.22914	Syt2	0.705285
1664	6654	P46412	SCN KI_vs_WT	-0.0735263	0.0848	0.402775	Gpx3	0.831095
1665	6658	P46412;P21765	SCN KI_vs_WT	0.059178	0.150696	0.708115	NA	0.974592
1666	6662	P46414	SCN KI_vs_WT	-0.012749	0.102494	0.903068	Cdkn1b	1
1667	6666	P46460	SCN KI_vs_WT	-0.0214926	0.0487	0.666772	Nsf	0.954651
1668	6670	P46467	SCN KI_vs_WT	0.0177178	0.0571	0.76156	Vps4b	1
1669	6674	P46471	SCN KI_vs_WT	0.00379824	0.0273	0.891682	NA	1
1670	6678	P46638	SCN KI_vs_WT	-0.0934213	0.0684	0.197196	Rab11b	0.671714
1671	6682	P46656	SCN KI_vs_WT	0.0273907	0.0479	0.577951	Fdx1	0.91044
1672	6686	P46660	SCN KI_vs_WT	-0.00284917	0.19788	0.988749	Ina	1
1673	6690	P46662	SCN KI_vs_WT	0.081273	0.0635	0.22484	Nf2	0.700989
1674	6694	P46664	SCN KI_vs_WT	-0.0321177	0.0529	0.555031	Adss2	0.899265
1675	6698	P46718	SCN KI_vs_WT	0.0665695	0.161689	0.687809	Pdcd2	0.963922
1676	6702	P46735	SCN KI_vs_WT	-0.0349925	0.119707	0.775036	Myo1b	1
1677	6706	P46735;Q9D6A1	SCN KI_vs_WT	NA	NA	NA	NA	NA
1678	6710	P46737	SCN KI_vs_WT	0.0056281	0.0734	0.940127	Brcc3	1
1679	6714	P46737;Q7M757	SCN KI_vs_WT	0.136191	0.129482	0.313604	NA	0.778119
1680	6718	P46935	SCN KI_vs_WT	-0.0195418	0.0469	0.684143	Nedd4	0.961869
1681	6722	P46938	SCN KI_vs_WT	0.246217	0.282692	0.400859	Yap1	0.830528
1682	6726	P46978	SCN KI_vs_WT	-0.0105526	0.116093	0.929074	Stt3a	1
1683	6730	P47199	SCN KI_vs_WT	0.0739021	0.0669	0.290879	Cryz	0.759479
1684	6734	P47212	SCN KI_vs_WT	-0.166526	0.13724	0.248321	Gal	0.72595
1685	6738	P47708	SCN KI_vs_WT	0.0280146	0.0761	0.719183	Rph3a	0.979944
1686	6742	P47738	SCN KI_vs_WT	-0.0578221	0.0802	0.484858	Aldh2	0.869065
1687	6746	P47740	SCN KI_vs_WT	-0.0263045	0.0293	0.38704	Aldh3a2	0.822717
1688	6750	P47740;P47739	SCN KI_vs_WT	0.0758888	0.127775	0.563591	NA	0.903852
1689	6754	P47743	SCN KI_vs_WT	-0.085221	0.099	0.406282	Grm8	0.832959
1690	6758	P47746	SCN KI_vs_WT	0.283772	0.240446	0.260791	Cnr1	0.737899
1691	6762	P47753	SCN KI_vs_WT	-0.0153151	0.0838	0.858088	NA	1
1692	6766	P47754	SCN KI_vs_WT	-0.105806	0.0636	0.121864	Capza2	0.568659
1693	6770	P47757	SCN KI_vs_WT	0.0486925	0.0576	0.414065	Capzb	0.835752
1694	6774	P47758	SCN KI_vs_WT	0.0586227	0.0624	0.365719	Srprb	0.81124
1695	6778	P47791	SCN KI_vs_WT	-0.00299874	0.069	0.966039	Gsr	1
1696	6782	P47802	SCN KI_vs_WT	0.0812972	0.0747	0.297934	NA	0.766146
1697	6786	P47809	SCN KI_vs_WT	0.0139886	0.0399	0.731878	Map2k4	0.986527
1698	6790	P47811	SCN KI_vs_WT	-0.0755111	0.0723	0.31672	Mapk14	0.779838
1699	6794	P47856	SCN KI_vs_WT	0.109163	0.0824	0.209735	Gfpt1	0.684302
1700	6798	P47856;Q9Z2Z9	SCN KI_vs_WT	-0.0279015	0.0549	0.62053	NA	0.931376
1701	6802	P47857	SCN KI_vs_WT	-0.0405024	0.0449	0.384608	Pfkm	0.821358
1702	6806	P47867	SCN KI_vs_WT	-0.053793	0.125121	0.674867	Scg3	0.958247
1703	6810	P47879	SCN KI_vs_WT	NA	NA	NA	Igfbp4	NA
1704	6814	P47911	SCN KI_vs_WT	0.0465017	0.0733	0.537625	Rpl6	0.891406
1705	6818	P47915	SCN KI_vs_WT	-0.178406	0.338209	0.60746	Rpl29	0.924048
1706	6822	P47915;W4VSN7	SCN KI_vs_WT	NA	NA	NA	NA	NA
1707	6826	P47934	SCN KI_vs_WT	-0.0390341	0.0517	0.465018	Crat	0.859963
1708	6830	P47941	SCN KI_vs_WT	-0.145686	0.0633	0.0401569	Crkl	0.338777
1709	6834	P47955	SCN KI_vs_WT	-0.973423	0.573561	0.140591	Rplp1	0.594913
1710	6838	P47962	SCN KI_vs_WT	0.0410955	0.0589	0.498393	Rpl5	0.874896
1711	6842	P47963	SCN KI_vs_WT	-0.058025	0.066	0.39663	Rpl13	0.827431
1712	6846	P47964	SCN KI_vs_WT	-0.109665	0.0907	0.249745	NA	0.727113
1713	6850	P47968	SCN KI_vs_WT	-0.0622431	0.187737	0.745952	Rpia	0.993514
1714	6854	P48024;Q9CXU9	SCN KI_vs_WT	-0.0553949	0.164606	0.742283	NA	0.991631
1715	6858	P48025	SCN KI_vs_WT	NA	NA	NA	Syk	NA
1716	6862	P48036	SCN KI_vs_WT	0.116454	0.107112	0.298297	Anxa5	0.766198
1717	6866	P48168	SCN KI_vs_WT	-0.246587	0.140226	0.104114	Glrb	0.535637
1718	6870	P48193	SCN KI_vs_WT	0.131391	0.109148	0.251882	Epb41	0.729017
1719	6874	P48302	SCN KI_vs_WT	-0.0995829	0.127497	0.449901	Ednrb	0.851504
1720	6878	P48318	SCN KI_vs_WT	0.0018174	0.105268	0.986509	Gad1	1
1721	6882	P48320	SCN KI_vs_WT	0.0384231	0.0948	0.692461	Gad2	0.966495
1722	6886	P48377	SCN KI_vs_WT	0.0109057	0.148715	0.942749	Rfx1	1
1723	6890	P48381	SCN KI_vs_WT	0.199379	0.163373	0.245758	Rfx3	0.723139
1724	6894	P48410	SCN KI_vs_WT	-0.123959	0.163374	0.462649	Abcd1	0.858678
1725	6898	P48428	SCN KI_vs_WT	0.0854352	0.112315	0.461536	Tbca	0.857891
1726	6902	P48432	SCN KI_vs_WT	0.0214306	0.280266	0.941535	Sox2	1
1727	6906	P48432;P53783;Q811W0	SCN KI_vs_WT	0.147797	0.366703	0.694004	NA	0.967216
1728	6910	P48432;P53783;Q811W0;Q04892	SCN KI_vs_WT	0.533188	0.49365	0.321592	NA	0.783261
1729	6914	P48441	SCN KI_vs_WT	0.00190332	0.195413	0.992389	NA	1
1730	6918	P48453	SCN KI_vs_WT	-0.0218433	0.0314	0.499897	Ppp3cb	0.875283
1731	6922	P48455	SCN KI_vs_WT	0.0508135	0.107211	0.644038	Ppp3cc	0.94388
1732	6926	P48542	SCN KI_vs_WT	-0.117519	0.157527	0.470014	Kcnj6	0.862266
1733	6930	P48542;P48545	SCN KI_vs_WT	NA	NA	NA	NA	NA
1734	6934	P48543	SCN KI_vs_WT	0.244437	0.215227	0.278249	Kcnj9	0.752768
1735	6938	P48678	SCN KI_vs_WT	-0.0284218	0.0725	0.702089	Lmna	0.971406
1736	6942	P48722	SCN KI_vs_WT	-0.00289248	0.0429	0.947335	Hspa4l	1
1737	6946	P48725	SCN KI_vs_WT	NA	NA	NA	Pcnt	NA
1738	6950	P48758	SCN KI_vs_WT	-0.00507079	0.0501	0.921078	Cbr1	1
1739	6954	P48771	SCN KI_vs_WT	-0.140023	0.116219	0.251496	Cox7a2	0.72872
1740	6958	P48774	SCN KI_vs_WT	-0.0950128	0.0849	0.285252	Gstm5	0.757444
1741	6962	P48962	SCN KI_vs_WT	-0.131419	0.0806	0.129105	Slc25a4	0.579932
1742	6966	P49025	SCN KI_vs_WT	-0.00836344	0.038	0.829609	Cit	1
1743	6970	P49070	SCN KI_vs_WT	-0.135474	0.127834	0.310117	Caml	0.77476
1744	6974	P49117	SCN KI_vs_WT	0.065512	0.0771	0.412258	Nr2c2	0.835752
1745	6978	P49135	SCN KI_vs_WT	NA	NA	NA	Ercc3	NA
1746	6982	P49138	SCN KI_vs_WT	0.132973	0.0771	0.110194	Mapkapk2	0.548848
1747	6986	P49138;Q3UMW7	SCN KI_vs_WT	-0.123963	0.0968	0.247606	NA	0.725243
1748	6990	P49138;Q3UMW7;Q9D2E1;Q922R0	SCN KI_vs_WT	-0.0411382	0.0765	0.610166	NA	0.925794
1749	6994	P49182	SCN KI_vs_WT	0.137477	0.226343	0.554915	Serpind1	0.899226
1750	6998	P49222	SCN KI_vs_WT	0.160245	0.164478	0.349156	Epb42	0.800199
1751	7002	P49312	SCN KI_vs_WT	0.0951912	0.147131	0.529824	Hnrnpa1	0.888075
1752	7006	P49442	SCN KI_vs_WT	-0.014629	0.0521	0.783671	Inpp1	1
1753	7010	P49443	SCN KI_vs_WT	-0.0057035	0.0453	0.901985	Ppm1a	1
1754	7014	P49446	SCN KI_vs_WT	-0.024543	0.101878	0.81765	Ptpre	1
1755	7018	P49586	SCN KI_vs_WT	-0.0600997	0.11299	0.6045	Pcyt1a	0.922795
1756	7022	P49615	SCN KI_vs_WT	-0.0807543	0.0945	0.409565	Cdk5	0.834928
1757	7026	P49710	SCN KI_vs_WT	0.0216979	0.0777	0.784814	Hcls1	1
1758	7030	P49722	SCN KI_vs_WT	-0.0125166	0.0557	0.825906	Psma2	1
1759	7034	P49769	SCN KI_vs_WT	-0.11608	0.197969	0.568503	NA	0.906268
1760	7038	P49813	SCN KI_vs_WT	0.0556773	0.0765	0.480768	Tmod1	0.86719
1761	7042	P49813;Q9JLH8	SCN KI_vs_WT	NA	NA	NA	NA	NA
1762	7046	P49817	SCN KI_vs_WT	0.0829604	0.226847	0.720946	Cav1	0.980828
1763	7050	P49817;P51637	SCN KI_vs_WT	0.0354332	0.214249	0.871396	NA	1
1764	7054	P49962	SCN KI_vs_WT	-0.124999	0.144297	0.403334	Srp9	0.831267
1765	7058	P50096	SCN KI_vs_WT	-0.191316	0.0799	0.0337754	Impdh1	0.309503
1766	7062	P50114	SCN KI_vs_WT	0.090248	0.196877	0.654858	S100b	0.948352
1767	7066	P50136	SCN KI_vs_WT	0.0307506	0.0586	0.609537	NA	0.925369
1768	7070	P50153	SCN KI_vs_WT	0.0806161	0.253372	0.755823	Gng4	0.998509
1769	7074	P50171	SCN KI_vs_WT	0.0379147	0.0643	0.566208	Hsd17b8	0.905105
1770	7078	P50172	SCN KI_vs_WT	-0.290613	0.167506	0.108335	Hsd11b1	0.545118
1771	7082	P50247	SCN KI_vs_WT	0.0165496	0.0543	0.765766	Ahcyl	1
1772	7086	P50285	SCN KI_vs_WT	-0.096404	0.11093	0.401864	Fmo1	0.830528
1773	7090	P50294	SCN KI_vs_WT	0.000594055	0.15934	0.997087	Nat1	1
1774	7094	P50295	SCN KI_vs_WT	0.135543	0.304802	0.664456	Nat2	0.953706
1775	7098	P50396	SCN KI_vs_WT	-0.0450727	0.0486	0.37229	Gdi1	0.815187
1776	7102	P50427	SCN KI_vs_WT	0.114482	0.0928	0.240984	Sts	0.719094
1777	7106	P50428	SCN KI_vs_WT	-0.119625	0.0846	0.18283	Arsa	0.656176
1778	7110	P50429	SCN KI_vs_WT	0.0792782	0.0825	0.355656	Arsb	0.805096
1779	7114	P50516	SCN KI_vs_WT	-0.0244007	0.0654	0.715497	Atp6v1a	0.978331
1780	7118	P50518	SCN KI_vs_WT	-0.116508	0.0737	0.139932	Atp6v1e1	0.594369
1781	7122	P50518;Q9D593	SCN KI_vs_WT	-0.10571	0.140348	0.465849	NA	0.860496
1782	7126	P50544	SCN KI_vs_WT	-0.0181023	0.0587	0.763076	Acadvl	1
1783	7130	P50571	SCN KI_vs_WT	-0.0219567	0.0968	0.82445	Gabrb1	1
1784	7134	P50580	SCN KI_vs_WT	-0.0650311	0.0523	0.237629	Pa2g4	0.71566
1785	7138	P50586	SCN KI_vs_WT	0.00186403	0.0515	0.971718	Tub	1
1786	7142	P50608	SCN KI_vs_WT	NA	NA	NA	Fmod	NA
1787	7146	P51125	SCN KI_vs_WT	0.0396015	0.158672	0.807132	Cast	1
1788	7150	P51141	SCN KI_vs_WT	0.104682	0.0945	0.289701	Dvl1	0.758532
1789	7154	P51141;Q60838	SCN KI_vs_WT	-0.263633	0.2784	0.362339	NA	0.809086
1790	7158	P51150	SCN KI_vs_WT	-0.0827661	0.0586	0.183239	Rab7	0.656701
1791	7162	P51163	SCN KI_vs_WT	-0.0467236	0.101721	0.654207	Uros	0.94803
1792	7166	P51174	SCN KI_vs_WT	-0.035749	0.0489	0.479206	Acadl	0.866539
1793	7170	P51175	SCN KI_vs_WT	0.031003	0.0666	0.649884	Ppox	0.946697
1794	7174	P51410	SCN KI_vs_WT	-0.116763	0.137706	0.41308	Rpl9	0.835752
1795	7178	P51410;A0A140T8T4	SCN KI_vs_WT	-0.0417215	0.0526	0.442716	NA	0.847359
1796	7182	P51432	SCN KI_vs_WT	-0.0380275	0.0708	0.601051	Plcb3	0.920979
1797	7186	P51569	SCN KI_vs_WT	-0.0319465	0.0686	0.649834	NA	0.946662
1798	7190	P51612	SCN KI_vs_WT	0.143568	0.0922	0.170396	Xpc	0.638331
1799	7194	P51655	SCN KI_vs_WT	-0.0287828	0.193977	0.884505	Gpc4	1
1800	7198	P51660	SCN KI_vs_WT	0.0229491	0.0454	0.622689	Hsd17b4	0.932616
1801	7202	P51791	SCN KI_vs_WT	-0.109123	0.0599	0.0934229	Clcn3	0.512662
1802	7206	P51807	SCN KI_vs_WT	0.281672	0.272717	0.322048	Dynlt1b	0.783597
1803	7210	P51829	SCN KI_vs_WT	-0.00777776	0.0932	0.936205	Adcy7	1
1804	7214	P51830	SCN KI_vs_WT	-0.0488852	0.0703	0.500156	Adcy9	0.875361
1805	7218	P51855	SCN KI_vs_WT	-0.0159475	0.0563	0.781871	Gss	1
1806	7222	P51859	SCN KI_vs_WT	-0.0211121	0.202837	0.918822	Hdgf	1
1807	7226	P51863	SCN KI_vs_WT	-0.099649	0.046	0.0511891	Atp6v0d1	0.382664
1808	7230	P51880	SCN KI_vs_WT	0.102414	0.151172	0.510964	Fabp7	0.880817
1809	7234	P51881	SCN KI_vs_WT	-0.0630864	0.110476	0.578508	Slc25a5	0.910554
1810	7238	P51885	SCN KI_vs_WT	NA	NA	NA	Lum	NA
1811	7242	P51906	SCN KI_vs_WT	-0.334269	0.326576	0.326237	Slc1a1	0.785738
1812	7246	P51910	SCN KI_vs_WT	0.0558112	0.0992	0.583937	Apod	0.912974
1813	7250	P51949	SCN KI_vs_WT	0.0284003	0.102918	0.787281	Mnat1	1
1814	7254	P51954	SCN KI_vs_WT	0.212635	0.0926	0.0404124	Nek1	0.34004
1815	7258	P52019	SCN KI_vs_WT	-0.344654	0.170409	0.0895886	Sqle	0.502762
1816	7262	P52189	SCN KI_vs_WT	0.0573497	0.131092	0.669536	NA	0.956006
1817	7266	P52194	SCN KI_vs_WT	-0.125458	0.192187	0.526198	Clgn	0.886648
1818	7270	P52196	SCN KI_vs_WT	-0.0907619	0.096	0.363174	Tst	0.809797
1819	7274	P52293	SCN KI_vs_WT	-0.0292168	0.159998	0.858155	Kpna2	1
1820	7278	P52332	SCN KI_vs_WT	-0.0171134	0.0646	0.795463	NA	1
1821	7282	P52431	SCN KI_vs_WT	0.0361136	0.104618	0.735924	Pold1	0.988706
1822	7286	P52432	SCN KI_vs_WT	0.126757	0.0903	0.185719	Polr1c	0.660107
1823	7290	P52479	SCN KI_vs_WT	-0.0418697	0.0554	0.464077	Usp10	0.859687
1824	7294	P52480	SCN KI_vs_WT	-0.0997733	0.0454	0.0482734	Pkm	0.371862
1825	7298	P52482	SCN KI_vs_WT	0.010414	0.194037	0.95894	Ube2e1	1
1826	7302	P52503	SCN KI_vs_WT	-0.0947753	0.129907	0.479658	Ndufs6	0.866919
1827	7306	P52623	SCN KI_vs_WT	-0.0516159	0.103974	0.628559	Uck1	0.936013
1828	7310	P52624	SCN KI_vs_WT	-0.126361	0.233032	0.597576	Upp1	0.919243
1829	7314	P52633	SCN KI_vs_WT	NA	NA	NA	Stat6	NA
1830	7318	P52734	SCN KI_vs_WT	-0.0792208	0.0957	0.423842	Fgd1	0.839797
1831	7322	P52760	SCN KI_vs_WT	0.182635	0.0874	0.0586685	Rida	0.40923
1832	7326	P52795	SCN KI_vs_WT	-0.0411445	0.106469	0.70593	Efnb1	0.973191
1833	7330	P52800	SCN KI_vs_WT	0.17666	0.0932	0.0824567	Efnb2	0.483991
1834	7334	P52825	SCN KI_vs_WT	0.0336081	0.0827	0.691708	Cpt2	0.966008
1835	7338	P52875	SCN KI_vs_WT	-0.254354	0.289897	0.397499	Tmem165	0.828018
1836	7342	P52912	SCN KI_vs_WT	0.209437	0.162131	0.22076	Tia1	0.696932
1837	7346	P52963	SCN KI_vs_WT	0.0458355	0.123043	0.722313	Epb41l4a	0.981285
1838	7350	P53026	SCN KI_vs_WT	-0.0600092	0.065	0.374284	NA	0.816348
1839	7354	P53395	SCN KI_vs_WT	-0.00103561	0.0525	0.984597	Dbt	1
1840	7358	P53564	SCN KI_vs_WT	-0.0201661	0.099	0.84206	Cux1	1
1841	7362	P53564;P70298	SCN KI_vs_WT	-0.138812	0.193252	0.486325	NA	0.869156
1842	7366	P53612	SCN KI_vs_WT	0.0490688	0.0813	0.557418	Rabggtb	0.900365
1843	7370	P53657	SCN KI_vs_WT	-0.0409108	0.580547	0.944981	NA	1
1844	7374	P53668	SCN KI_vs_WT	-0.11057	0.0975	0.278877	Limk1	0.753424
1845	7378	P53702	SCN KI_vs_WT	-0.0211348	0.0759	0.785431	Hccs	1
1846	7382	P53798	SCN KI_vs_WT	-0.134226	0.194102	0.502394	Fdft1	0.876137
1847	7386	P53808	SCN KI_vs_WT	-0.120806	0.100044	0.272666	NA	0.74957
1848	7390	P53810	SCN KI_vs_WT	-0.0338639	0.0398	0.412058	Pitpna	0.835752
1849	7394	P53811	SCN KI_vs_WT	-0.0630152	0.149415	0.680668	Pitpnb	0.960445
1850	7398	P53986	SCN KI_vs_WT	-0.137644	0.149402	0.375046	Slc16a1	0.816981
1851	7402	P53994	SCN KI_vs_WT	0.0157198	0.0562	0.784594	Rab2a	1
1852	7406	P53995	SCN KI_vs_WT	0.0956683	0.0505	0.0825598	Anapc1	0.484391
1853	7410	P53996	SCN KI_vs_WT	-0.0154007	0.0382	0.701014	Cnbp	0.970822
1854	7414	P54071	SCN KI_vs_WT	0.0143124	0.0545	0.797149	Idh2	1
1855	7418	P54103	SCN KI_vs_WT	0.0573081	0.0896	0.534331	Dnajc2	0.890304
1856	7422	P54116	SCN KI_vs_WT	0.142637	0.124945	0.27589	Stom	0.751321
1857	7426	P54227	SCN KI_vs_WT	-0.0596074	0.160417	0.716685	Stmn1	0.978689
1858	7430	P54254	SCN KI_vs_WT	-0.0846939	0.0849	0.338376	Atxn1	0.793912
1859	7434	P54276	SCN KI_vs_WT	0.0187243	0.0684	0.788869	Msh6	1
1860	7438	P54285	SCN KI_vs_WT	0.0232452	0.0486	0.640973	Cacnb3	0.942638
1861	7442	P54310	SCN KI_vs_WT	-0.0307988	0.0806	0.70909	Lipe	0.974991
1862	7446	P54726	SCN KI_vs_WT	0.0801177	0.20027	0.696151	Rad23a	0.968346
1863	7450	P54728	SCN KI_vs_WT	-0.0191856	0.125914	0.881426	Rad23b	1
1864	7454	P54729	SCN KI_vs_WT	0.032034	0.0578	0.589322	Nub1	0.916042
1865	7458	P54731	SCN KI_vs_WT	0.0208057	0.048	0.672501	Faf1	0.957238
1866	7462	P54751	SCN KI_vs_WT	0.020059	0.0758	0.800158	St3gal1	1
1867	7466	P54754	SCN KI_vs_WT	0.0114684	0.125271	0.928567	Ephb3	1
1868	7470	P54754;P54761	SCN KI_vs_WT	-0.0765408	0.202035	0.717844	NA	0.979464
1869	7474	P54763	SCN KI_vs_WT	0.0010189	0.159685	0.995014	Ephb2	1
1870	7478	P54775	SCN KI_vs_WT	0.0190579	0.0448	0.678204	Psmc4	0.959067
1871	7482	P54797	SCN KI_vs_WT	-0.181702	0.128095	0.181492	NA	0.654416
1872	7486	P54818	SCN KI_vs_WT	-0.0409797	0.0743	0.591274	Galc	0.91676
1873	7490	P54822	SCN KI_vs_WT	-0.00916995	0.0536	0.867025	Adsl	1
1874	7494	P54823	SCN KI_vs_WT	-0.0719711	0.0368	0.0740015	Ddx6	0.462235
1875	7498	P54830	SCN KI_vs_WT	0.0871323	0.0778	0.284479	Ptpn5	0.757218
1876	7502	P54869	SCN KI_vs_WT	-0.0192663	0.1817	0.917308	Hmgcs2	1
1877	7506	P54923	SCN KI_vs_WT	-0.0401833	0.0897	0.662028	Adprh	0.952389
1878	7510	P55012	SCN KI_vs_WT	-0.092415	0.0652	0.182018	Slc12a2	0.655207
1879	7514	P55012;P55014	SCN KI_vs_WT	-0.117221	0.136855	0.408483	NA	0.834383
1880	7518	P55065	SCN KI_vs_WT	-0.159595	0.162097	0.344274	Pltp	0.79706
1881	7522	P55066	SCN KI_vs_WT	-0.0699491	0.0607	0.271705	Ncan	0.748653
1882	7526	P55088	SCN KI_vs_WT	-0.354349	0.286554	0.239895	Aqp4	0.718523
1883	7530	P55095	SCN KI_vs_WT	0.182354	0.124558	0.193526	Gcg	0.667203
1884	7534	P55096	SCN KI_vs_WT	0.0533431	0.0648	0.426591	Abcd3	0.841134
1885	7538	P55099	SCN KI_vs_WT	-0.0788225	0.2218	0.734467	Tac2	0.988181
1886	7542	P55144	SCN KI_vs_WT	0.235754	0.0959	0.0301862	Tyro3	0.290364
1887	7546	P55194	SCN KI_vs_WT	-0.0665998	0.0988	0.512913	Sh3bp1	0.881852
1888	7550	P55200	SCN KI_vs_WT	-0.0941778	0.153973	0.55218	NA	0.897332
1889	7554	P55258	SCN KI_vs_WT	0.0516904	0.084	0.549979	Rab8a	0.896531
1890	7558	P55264	SCN KI_vs_WT	0.0203339	0.0603	0.74189	Adk	0.991332
1891	7562	P55284	SCN KI_vs_WT	-0.189474	0.139939	0.200694	Cdh5	0.675152
1892	7566	P55288	SCN KI_vs_WT	-0.0268721	0.0904	0.77125	Cdh11	1
1893	7570	P55302	SCN KI_vs_WT	0.156531	0.098	0.136071	Lrpap1	0.589555
1894	7574	P55772	SCN KI_vs_WT	-0.067677	0.0741	0.378831	Entpd1	0.818889
1895	7578	P55821	SCN KI_vs_WT	-0.0036441	0.17378	0.983615	Stmn2	1
1896	7582	P55937	SCN KI_vs_WT	-0.082903	0.0352	0.0363931	Golga3	0.322237
1897	7586	P56135	SCN KI_vs_WT	0.0125254	0.35678	0.972572	Atp5mf	1
1898	7590	P56183	SCN KI_vs_WT	-0.0573609	0.117269	0.633561	Rrp1	0.938637
1899	7594	P56212	SCN KI_vs_WT	-0.245409	0.161612	0.154784	Arpp19	0.617196
1900	7598	P56213	SCN KI_vs_WT	-0.0525823	0.057	0.37451	Gfer	0.816409
1901	7602	P56371	SCN KI_vs_WT	0.0643452	0.0528	0.246035	Rab4a	0.72337
1902	7606	P56375	SCN KI_vs_WT	0.256817	0.09	0.0145149	Acyp2	0.186828
1903	7610	P56376	SCN KI_vs_WT	-0.0525611	0.0654	0.437185	Acyp1	0.846174
1904	7614	P56379	SCN KI_vs_WT	0.122935	0.220828	0.587964	Atp5mj	0.915156
1905	7618	P56380	SCN KI_vs_WT	0.0267356	0.0747	0.726487	Nudt2	0.983719
1906	7622	P56382	SCN KI_vs_WT	0.158912	0.120033	0.2102	Atp5f1e	0.685251
1907	7626	P56387	SCN KI_vs_WT	0.0464885	0.212048	0.833734	Dynlt3	1
1908	7630	P56388	SCN KI_vs_WT	0.0770301	0.215507	0.726973	Cartpt	0.984005
1909	7634	P56389	SCN KI_vs_WT	-0.0426266	0.189679	0.82597	Cda	1
1910	7638	P56391	SCN KI_vs_WT	-0.0392654	0.129729	0.767322	Cox6b1	1
1911	7642	P56392	SCN KI_vs_WT	-0.0477299	0.110464	0.673342	Cox7a1	0.95753
1912	7646	P56394	SCN KI_vs_WT	0.149168	0.294046	0.621143	Cox17	0.931701
1913	7650	P56395	SCN KI_vs_WT	0.0279377	0.113008	0.808918	Cyb5a	1
1914	7654	P56399	SCN KI_vs_WT	-0.018368	0.0813	0.824993	Usp5	1
1915	7658	P56473	SCN KI_vs_WT	0.286695	0.18638	0.149935	Agrp	0.609946
1916	7662	P56480	SCN KI_vs_WT	-0.0380123	0.0981	0.705265	Atp5f1b	0.972922
1917	7666	P56501	SCN KI_vs_WT	-0.120451	0.0846	0.180002	Ucp3	0.652272
1918	7670	P56501;P70406	SCN KI_vs_WT	NA	NA	NA	NA	NA
1919	7674	P56528	SCN KI_vs_WT	-0.0102357	0.110477	0.927711	Cd38	1
1920	7678	P56546	SCN KI_vs_WT	0.0425033	0.111002	0.708486	Ctbp2	0.974878
1921	7682	P56564	SCN KI_vs_WT	-0.0268261	0.096	0.784725	Slc1a3	1
1922	7686	P56564;O35544	SCN KI_vs_WT	-0.325322	0.234792	0.191088	NA	0.663866
1923	7690	P56565	SCN KI_vs_WT	-0.354765	0.657642	0.599443	S100a1	0.920246
1924	7694	P56581	SCN KI_vs_WT	-0.17579	0.12563	0.187047	Tdg	0.66102
1925	7698	P56695	SCN KI_vs_WT	-0.0952838	0.310611	0.764282	Wfs1	1
1926	7702	P56812	SCN KI_vs_WT	0.00964438	0.131687	0.942824	Pdcd5	1
1927	7706	P56818	SCN KI_vs_WT	0.0105384	0.108273	0.924069	Bace1	1
1928	7710	P56873	SCN KI_vs_WT	-0.00285535	0.0691	0.96774	Znrd2	1
1929	7714	P56942	SCN KI_vs_WT	-0.25971	0.444729	0.570053	Pmch	0.907222
1930	7718	P56959	SCN KI_vs_WT	0.0633949	0.193474	0.74881	Fus	0.994936
1931	7722	P56960	SCN KI_vs_WT	-0.0417122	0.127567	0.749315	Exosc10	0.995189
1932	7726	P57080	SCN KI_vs_WT	0.124661	0.0968	0.221992	Usp25	0.697705
1933	7730	P57716	SCN KI_vs_WT	-0.0127074	0.0995	0.900497	Ncstn	1
1934	7734	P57722	SCN KI_vs_WT	-0.0194468	0.146708	0.896743	Pcbp3	1
1935	7738	P57724	SCN KI_vs_WT	-0.082658	0.124696	0.519941	Pcbp4	0.885029
1936	7742	P57746	SCN KI_vs_WT	-0.020663	0.0382	0.598413	Atp6v1d	0.919728
1937	7746	P57759	SCN KI_vs_WT	0.0650465	0.0626	0.319496	Erp29	0.782193
1938	7750	P57774	SCN KI_vs_WT	0.280207	0.190704	0.167466	Npy	0.634813
1939	7754	P57776	SCN KI_vs_WT	0.0552335	0.0768	0.485656	Eef1d	0.869065
1940	7758	P57780	SCN KI_vs_WT	-0.0419721	0.0503	0.420357	Actn4	0.838505
1941	7762	P57784	SCN KI_vs_WT	0.0499638	0.0587	0.411151	Snrpa1	0.835587
1942	7766	P58006	SCN KI_vs_WT	0.143286	0.120572	0.257668	Sesn1	0.73504
1943	7770	P58021	SCN KI_vs_WT	-0.045519	0.076	0.560539	Tm9sf2	0.901946
1944	7774	P58044	SCN KI_vs_WT	0.117021	0.112388	0.318294	Idi1	0.781213
1945	7778	P58058	SCN KI_vs_WT	0.0172846	0.126239	0.893365	Nadk	1
1946	7782	P58059	SCN KI_vs_WT	-0.238657	0.103226	0.0393342	Mrps21	0.33552
1947	7786	P58064	SCN KI_vs_WT	-0.0399389	0.10455	0.709134	Mrps6	0.974991
1948	7790	P58069	SCN KI_vs_WT	0.0265338	0.0553	0.639956	Rasa2	0.942014
1949	7794	P58137	SCN KI_vs_WT	0.135131	0.0732	0.089511	Acot8	0.502694
1950	7798	P58158	SCN KI_vs_WT	-0.0921452	0.0952	0.351949	B3gat3	0.802624
1951	7802	P58196	SCN KI_vs_WT	0.499863	0.402799	0.238329	Plscr4	0.71683
1952	7806	P58242	SCN KI_vs_WT	0.0523388	0.205065	0.802867	Smpdl3b	1
1953	7810	P58252	SCN KI_vs_WT	0.039869	0.0395	0.332297	Eef2	0.789596
1954	7814	P58269	SCN KI_vs_WT	NA	NA	NA	Dpf3	NA
1955	7818	P58281	SCN KI_vs_WT	-0.0863715	0.0356	0.0320662	Opa1	0.301413
1956	7822	P58389	SCN KI_vs_WT	-0.0154659	0.0967	0.875609	Ptpa	1
1957	7826	P58390	SCN KI_vs_WT	-0.285879	0.151221	0.0830823	Kcnn2	0.486422
1958	7830	P58391	SCN KI_vs_WT	-0.00692329	0.170478	0.968274	Kcnn3	1
1959	7834	P58404	SCN KI_vs_WT	0.0329012	0.0477	0.503135	Strn4	0.876372
1960	7838	P58462	SCN KI_vs_WT	NA	NA	NA	Foxp1	NA
1961	7842	P58465	SCN KI_vs_WT	-0.220047	0.119804	0.115902	Ctdspl	0.55886
1962	7846	P58466	SCN KI_vs_WT	-0.114124	0.117706	0.351397	Ctdsp1	0.802117
1963	7850	P58468	SCN KI_vs_WT	0.0707216	0.0834	0.413243	Slx9	0.835752
1964	7854	P58501	SCN KI_vs_WT	-0.0972372	0.130232	0.469653	Paxbp1	0.862189
1965	7858	P58544	SCN KI_vs_WT	0.126745	0.138037	0.376602	Btbd1	0.817888
1966	7862	P58686	SCN KI_vs_WT	0.0801874	0.139037	0.574777	Bbln	0.909093
1967	7866	P58742	SCN KI_vs_WT	-0.0548409	0.0741	0.473594	Aaas	0.863837
1968	7870	P58771	SCN KI_vs_WT	-0.0173462	0.256351	0.947166	Tpm1	1
1969	7874	P58802	SCN KI_vs_WT	0.0248047	0.0573	0.672952	Tbc1d10a	0.95732
1970	7878	P58854	SCN KI_vs_WT	-0.0689242	0.0537	0.223559	Tubgcp3	0.699488
1971	7882	P58871	SCN KI_vs_WT	-0.0387856	0.0598	0.528926	Tnks1bp1	0.887399
1972	7886	P58873	SCN KI_vs_WT	0.0368189	0.206577	0.864405	Rhbdl3	1
1973	7890	P58929	SCN KI_vs_WT	0.216662	0.0668	0.00706876	Gmeb2	0.11801
1974	7894	P59016	SCN KI_vs_WT	0.0540135	0.0392	0.19347	Vps33b	0.667183
1975	7898	P59017	SCN KI_vs_WT	0.0793414	0.239792	0.746445	Bcl2l13	0.993645
1976	7902	P59024	SCN KI_vs_WT	-0.0615982	0.0476	0.243431	Fkbp14	0.720856
1977	7906	P59041	SCN KI_vs_WT	-0.0471963	0.0948	0.627631	Dnajc30	0.935369
1978	7910	P59108	SCN KI_vs_WT	-0.135156	0.111787	0.249927	Cpne2	0.727284
1979	7914	P59114	SCN KI_vs_WT	-0.0241122	0.129003	0.854853	Pcif1	1
1980	7918	P59235	SCN KI_vs_WT	-0.0561242	0.0833	0.513176	Nup43	0.882001
1981	7922	P59240	SCN KI_vs_WT	-0.0262945	0.127007	0.839457	Nphp4	1
1982	7926	P59242	SCN KI_vs_WT	0.00445994	0.105738	0.96705	NA	1
1983	7930	P59266	SCN KI_vs_WT	-0.277094	0.193209	0.201521	Fitm2	0.675247
1984	7934	P59267	SCN KI_vs_WT	0.0925527	0.126477	0.478355	Zdhhc2	0.865811
1985	7938	P59270	SCN KI_vs_WT	0.0686897	0.163191	0.688477	B3gat2	0.964386
1986	7942	P59279	SCN KI_vs_WT	-0.00777875	0.0895	0.93218	Rab2b	1
1987	7946	P59281	SCN KI_vs_WT	-0.0873442	0.0612	0.178702	Arhgap39	0.649984
1988	7950	P59325	SCN KI_vs_WT	-0.0109437	0.0502	0.830926	Eif5	1
1989	7954	P59326	SCN KI_vs_WT	-0.0253705	0.0384	0.521168	Ythdf1	0.885313
1990	7958	P59470	SCN KI_vs_WT	-0.0660434	0.101346	0.526904	Polr3b	0.886648
1991	7962	P59481	SCN KI_vs_WT	-0.05801	0.0671	0.404117	Lman2l	0.83172
1992	7966	P59644	SCN KI_vs_WT	-0.0259454	0.0553	0.647294	Inpp5j	0.945459
1993	7970	P59648	SCN KI_vs_WT	-0.139604	0.458877	0.766164	Fxyd7	1
1994	7974	P59672	SCN KI_vs_WT	-0.00126958	0.124752	0.992047	Anks1	1
1995	7978	P59759	SCN KI_vs_WT	0.0095099	0.0537	0.862509	Mrtfb	1
1996	7982	P59764	SCN KI_vs_WT	0.0114262	0.0668	0.867038	Dock4	1
1997	7986	P59808	SCN KI_vs_WT	-0.063586	0.0994	0.534282	Sash1	0.890304
1998	7990	P59808;P57725	SCN KI_vs_WT	0.264947	0.136363	0.0758539	NA	0.466926
1999	7994	P59823	SCN KI_vs_WT	-0.125653	0.0805	0.144428	NA	0.60105
[truncated: 6,966 more rows]

## Sheet: SCN_protein_GO
	query	significant	p_value	term_size	query_size	intersection_size	precision	recall	term_id	source	term_name	effective_domain_size	source_order	parents	evidence_codes	intersection	gene_ratio
1	query_1	TRUE	2.05e-08	15777	193	180	0.932642	0.011409	GO:0009987	GO:BP	cellular process	21165	3796	GO:0008150	IGI ISS,IBA,IBA NAS,ISO IBA,IDA IBA,ISA,IMP IBA,IMP ISO IBA,IBA,IGI ISS ISO,IMP ISS,EXP IDA IMP IGI ISS ISO IBA,IDA IMP IGI ISS ISO IBA,IDA ISO IBA,IDA IMP ISS IBA,IMP,IDA IGI IBA,ISS,IMP ISO IBA,ISO IBA,IDA IMP ISS IBA,IDA IMP ISS,IDA ISS ISO IBA,IBA,IDA IBA,IDA IMP IBA TAS NAS,IDA IGI ISS ISO IBA IC,TAS,IDA IGI ISS IBA,IDA IMP IGI IBA,IDA IMP IGI ISO IBA IC,IDA IMP ISS ISO IBA,IDA IMP IGI ISS I…	Dhtkd1,Fbxl16,Exoc6b,Pigg,Pcdh10,Or51v14,Wdfy1,Cacna1i,Nfxl1,Farp1,Ro60,Ntn1,Gclm,Kpna4,Kpna6,Pld3,Cdk5r2,Nmt2,Dhcr7,Gosr1,Pomc,Mb,Got2,Klk1,Klk1b22,Ap2a2,Tpi1,Lsp1,Pcgf2,Ndn,Fas,Kif5c,Ptpn6,Prkar2b,Ptpn11,Cd81,Por,Acvr1,Crkl,Impdh1,Nek1,Pkm,Tyro3,Mrps21,Opa1,Gmeb2,Timm10,Prkacb,Tuba4a,Adcyap1r1,Nos3,Hnrnph2,Cdh10,Sms,Smad5,Cacna1c,Prkcz,Anxa7,Dok7,Pip4p1,2510002D24Rik,Tmem109,Spout1,Nr1d1,Gpr149…	0.011
2	query_1	TRUE	0.000146198	9265	193	121	0.626943	0.0130599	GO:0008152	GO:BP	metabolic process	21165	3111	GO:0009987	ISS,IBA,ISO IBA,IBA,ISS,IDA IMP ISS ISO IBA,IMP,IMP,ISS,IMP ISO IBA,IDA IMP ISS,ISS,IDA ISS ISO IBA,IBA,IDA IBA,IDA IGI ISS ISO IBA IC,IGI IBA,IDA IMP IGI IBA,IMP,IMP IGI,IMP,IMP IGI ISS,IMP ISS,ISO,IMP,IMP IGI,IMP IBA TAS,IDA ISS ISO IBA,ISS,ISS NAS,IMP ISS,IBA,IDA IGI,ISO,IMP IGI ISO IBA,IBA,IMP ISO IBA,IDA IGI IBA,IMP ISS,IDA IMP,ISS IBA,ISS IBA,IDA IMP ISO IBA,ISS,IMP ISO,IDA,IDA IMP ISS IBA,…	Dhtkd1,Fbxl16,Pigg,Nfxl1,Ro60,Gclm,Kpna6,Pld3,Nmt2,Dhcr7,Pomc,Mb,Got2,Klk1,Klk1b22,Tpi1,Pcgf2,Ndn,Fas,Ptpn6,Prkar2b,Ptpn11,Cd81,Por,Acvr1,Crkl,Impdh1,Pkm,Tyro3,Mrps21,Opa1,Gmeb2,Prkacb,Adcyap1r1,Nos3,Hnrnph2,Sms,Smad5,Prkcz,Dok7,Pip4p1,Spout1,Nr1d1,Klhdc2,Lrrk2,Crhbp,Rai1,Abcg1,Isy1,Dusp23,Cyfip1,Fbxo11,Gtf2a2,Pdk1,Ptbp3,Atcay,Bmp3,Serinc5,Pgghg,Casp9,Tmt1a,Tsku,Dpyd,Gatad2a,Angel2,Ablim1,Aldh1l1…	0.013
3	query_1	TRUE	0.00017869	4325	193	71	0.367876	0.0164162	GO:0051179	GO:BP	localization	21165	13378	GO:0008150	IBA NAS,ISO IBA,IGI,IDA,IDA ISO IBA,IDA ISS IBA,IDA,ISO IBA,IMP IBA,ISO IBA,IDA IMP IBA TAS NAS,IDA IMP ISS ISO IBA,IGI,IMP,IDA IMP ISS,IDA IMP IGI,IMP IGI IBA,ISO,IDA IBA,ISO,IMP,IDA IMP ISS ISO IBA,IMP ISO,IMP IGI,IDA IMP IGI,ISS,ISS IBA,IMP,IMP IBA,IDA IMP ISO TAS,IMP IBA,IDA ISS ISO IBA,IDA IMP ISS ISO IBA,ISS,ISO,ISO,IBA,ISS ISO,IBA,IBA,ISO,IMP IBA,IMP,ISO,IBA NAS,ISO IBA,IMP,IDA IMP ISO IBA…	Exoc6b,Cacna1i,Farp1,Ntn1,Kpna4,Kpna6,Cdk5r2,Gosr1,Pomc,Mb,Ap2a2,Kif5c,Ptpn6,Ptpn11,Cd81,Crkl,Tyro3,Opa1,Timm10,Adcyap1r1,Nos3,Cacna1c,Prkcz,Anxa7,Dok7,Pip4p1,Spout1,Nr1d1,Slc25a31,Lrrk2,Arcn1,Crhbp,Abcg1,Ripor1,Cyfip1,Fbxo11,Ano10,Atcay,Slc9a7,Srp68,Neto2,Tctn1,Tsku,Ubac2,Gle1,Slco3a1,Bloc1s4,Dtnbp1,Gorasp1,Sh3bp4,Neurl1a,Plpp3,Grpel1,Zdhhc6,Chmp3,Immp1l,Tomm34,Cmtm6,Atp5f1d,Golga7b,Borcs8,Appbp…	0.016
4	query_1	TRUE	0.00152896	2907	193	52	0.26943	0.0178879	GO:0051641	GO:BP	cellular localization	21165	13664	GO:0009987, GO:0051179	IBA NAS,IGI,IDA,IDA ISO IBA,IDA ISS IBA,ISO IBA,IDA IMP TAS NAS,IDA IMP ISS ISO IBA,IGI,IMP,IMP ISS,IDA IMP IGI,IMP,IDA IBA,ISO,IMP,IDA IMP ISS ISO,IMP ISO,IMP IGI,IDA IMP IGI,ISS IBA,IMP,IDA IMP ISO TAS,IMP IBA,ISO,ISS,ISO,ISS,IBA,ISO,IMP IBA,ISO,IBA NAS,IMP,IDA IMP ISO IBA,ISS,ISS,IBA,IBA,ISO IBA NAS,IBA,IBA,ISS,IBA,NAS,ISO,IMP,IMP,IMP,IGI,IDA,IGI	Exoc6b,Farp1,Ntn1,Kpna4,Kpna6,Gosr1,Ap2a2,Kif5c,Ptpn6,Ptpn11,Cd81,Crkl,Tyro3,Timm10,Adcyap1r1,Nos3,Cacna1c,Prkcz,Anxa7,Dok7,Spout1,Nr1d1,Lrrk2,Arcn1,Abcg1,Ripor1,Cyfip1,Atcay,Srp68,Neto2,Tctn1,Ubac2,Gle1,Bloc1s4,Dtnbp1,Gorasp1,Sh3bp4,Grpel1,Zdhhc6,Chmp3,Immp1l,Tomm34,Cmtm6,Golga7b,Borcs8,Appbp2,Pfn2,Selenok,Cln8,Ulk2,Timm9,Bnip3l	0.018
5	query_1	TRUE	0.00171159	1522	193	34	0.176166	0.022339	GO:0120036	GO:BP	plasma membrane bounded cell projection organization	21165	19210	GO:0030030	ISS ISO,IMP,IDA IMP ISS ISO IBA,IBA,IMP,ISO,IMP IBA,IMP,IGI,ISO,IGI,IDA IBA,IGI ISS ISO,IBA,IMP,IDA IMP ISS ISO IBA,IDA ISO,ISS IBA,IMP IBA,IMP,IDA ISO IBA,IBA,NAS,IDA IMP ISS ISO IBA NAS,ISS ISO,IDA IMP,IDA IMP,IBA,ISO,IGI IBA,IMP,ISO,IMP,IMP IBA	Farp1,Ro60,Ntn1,Cdk5r2,Ndn,Fas,Kif5c,Ptpn11,Crkl,Opa1,Prkcz,Myo16,Lrrk2,Dusp23,Mtss2,Cyfip1,Atcay,Ttc12,Tctn1,Tsku,Ablim1,Rttn,Bloc1s4,Dtnbp1,Gorasp1,Srgap2,Neurl1a,Eps8l2,Stk24,Chodl,Efhd1,Slc23a2,Pfn2,Ulk2	0.022
6	query_1	TRUE	0.00181822	7915	193	105	0.544041	0.013266	GO:0044238	GO:BP	primary metabolic process	21165	10839	GO:0008152	IBA,ISO IBA,IBA,IMP ISS,IMP,ISS,IMP ISO IBA,IMP ISS,IDA ISS ISO IBA,IBA,IDA IBA,IDA IGI IBA IC,IGI IBA,IDA IMP IGI IBA,IMP,IMP,IMP ISS,ISO,IMP,IGI,IMP IBA TAS,IDA ISS ISO IBA,ISS,ISS NAS,ISS,IBA,IDA IGI,ISO,IBA,IBA,IDA IGI IBA,ISS,IDA IMP,ISS IBA,ISS IBA,IDA IMP ISO IBA,ISS,IMP,IDA ISS IBA,IMP,ISS IBA,EXP IDA IMP IEP IBA,ISS ISO IBA,ISO IBA NAS,IMP ISS IBA,IMP IBA,ISS,IDA,ISS ISO,IBA,ISO RCA,ISS,…	Fbxl16,Pigg,Nfxl1,Gclm,Kpna6,Nmt2,Dhcr7,Pomc,Got2,Klk1,Klk1b22,Tpi1,Pcgf2,Ndn,Ptpn6,Prkar2b,Ptpn11,Por,Acvr1,Crkl,Impdh1,Pkm,Tyro3,Mrps21,Opa1,Gmeb2,Prkacb,Adcyap1r1,Nos3,Hnrnph2,Smad5,Prkcz,Dok7,Pip4p1,Spout1,Nr1d1,Klhdc2,Lrrk2,Rai1,Abcg1,Isy1,Cyfip1,Fbxo11,Gtf2a2,Pdk1,Ptbp3,Atcay,Bmp3,Serinc5,Pgghg,Casp9,Tmt1a,Tsku,Dpyd,Gatad2a,Angel2,Ablim1,Aldh1l1,Zc3h10,Tcf25,Tmx1,Gtf2h3,Ubac1,Psmd2,St3gal6,…	0.013
7	query_1	TRUE	0.00211376	1055	193	27	0.139896	0.0255924	GO:0031175	GO:BP	neuron projection development	21165	7049	GO:0048666, GO:0120036	ISS ISO,IDA IMP ISO IBA,IBA,IMP,ISO,IMP IBA,IMP,IGI,ISO,IGI,IDA IBA,IGI ISS ISO,IMP ISS ISO IBA,IDA ISO,IMP,IMP,IDA,NAS,IDA IMP ISS ISO IBA NAS,ISS ISO,IMP,IDA,ISO,IGI IBA,IMP,ISO,IMP IBA	Farp1,Ntn1,Cdk5r2,Ndn,Fas,Kif5c,Ptpn11,Crkl,Opa1,Prkcz,Myo16,Lrrk2,Cyfip1,Atcay,Tctn1,Tsku,Ablim1,Bloc1s4,Dtnbp1,Gorasp1,Srgap2,Neurl1a,Stk24,Chodl,Efhd1,Slc23a2,Ulk2	0.026
8	query_1	TRUE	0.00243227	1546	193	34	0.176166	0.0219922	GO:0030030	GO:BP	cell projection organization	21165	6621	GO:0016043	ISS ISO,IMP,IDA IMP ISS ISO IBA,IBA,IMP,ISO,IMP IBA,IMP,IGI,ISO,IGI,IDA IBA,IGI ISS ISO,IBA,IMP IBA,IDA IMP ISS ISO IBA,IDA ISO,ISS IBA,IMP IBA,IMP,IDA ISO IBA,IBA,NAS,IDA IMP ISS ISO IBA NAS,ISS ISO,IDA IMP,IDA IMP,IBA,ISO,IGI IBA,IMP,ISO,IMP,IMP IBA	Farp1,Ro60,Ntn1,Cdk5r2,Ndn,Fas,Kif5c,Ptpn11,Crkl,Opa1,Prkcz,Myo16,Lrrk2,Dusp23,Mtss2,Cyfip1,Atcay,Ttc12,Tctn1,Tsku,Ablim1,Rttn,Bloc1s4,Dtnbp1,Gorasp1,Srgap2,Neurl1a,Eps8l2,Stk24,Chodl,Efhd1,Slc23a2,Pfn2,Ulk2	0.022
9	query_1	TRUE	0.00420898	654	193	20	0.103627	0.030581	GO:0048812	GO:BP	neuron projection morphogenesis	21165	12891	GO:0031175, GO:0120039	ISS ISO,IDA IMP ISO IBA,IBA,IMP,IMP IBA,IMP,ISO,IGI,IDA IBA,IGI ISS ISO,IMP ISS ISO IBA,IMP,IMP,IDA,IDA IMP ISO,ISS ISO,IMP,IBA,ISO,IMP IBA	Farp1,Ntn1,Cdk5r2,Ndn,Kif5c,Ptpn11,Opa1,Prkcz,Myo16,Lrrk2,Cyfip1,Tctn1,Tsku,Ablim1,Dtnbp1,Gorasp1,Srgap2,Chodl,Slc23a2,Ulk2	0.031
10	query_1	TRUE	0.00505564	662	193	20	0.103627	0.0302115	GO:0120039	GO:BP	plasma membrane bounded cell projection morphogenesis	21165	19211	GO:0048858	ISS ISO,IDA IMP ISO IBA,IBA,IMP,IMP IBA,IMP,ISO,IGI,IDA IBA,IGI ISS ISO,IMP ISS ISO IBA,IMP,IMP,IDA,IDA IMP ISO,ISS ISO,IMP,IBA,ISO,IMP IBA	Farp1,Ntn1,Cdk5r2,Ndn,Kif5c,Ptpn11,Opa1,Prkcz,Myo16,Lrrk2,Cyfip1,Tctn1,Tsku,Ablim1,Dtnbp1,Gorasp1,Srgap2,Chodl,Slc23a2,Ulk2	0.03
11	query_1	TRUE	0.00592039	669	193	20	0.103627	0.0298954	GO:0048858	GO:BP	cell projection morphogenesis	21165	12933	GO:0000902, GO:0009653, GO:0030030	ISS ISO,IDA IMP ISO IBA,IBA,IMP,IMP IBA,IMP,ISO,IGI,IDA IBA,IGI ISS ISO,IMP ISS ISO IBA,IMP,IMP,IDA,IDA IMP ISO,ISS ISO,IMP,IBA,ISO,IMP IBA	Farp1,Ntn1,Cdk5r2,Ndn,Kif5c,Ptpn11,Opa1,Prkcz,Myo16,Lrrk2,Cyfip1,Tctn1,Tsku,Ablim1,Dtnbp1,Gorasp1,Srgap2,Chodl,Slc23a2,Ulk2	0.03
12	query_1	TRUE	0.00876047	3777	193	60	0.310881	0.0158856	GO:0051234	GO:BP	establishment of localization	21165	13403	GO:0051179	IBA NAS,ISO IBA,IDA,IDA ISO IBA,IDA ISS IBA,IDA,ISO IBA,IMP IBA,ISO IBA,IDA IMP IBA TAS NAS,IDA IMP ISS ISO IBA,IGI,IMP,IDA ISS,IMP IGI IBA,ISO,IDA IBA,ISO,IMP,IDA IMP ISS ISO IBA,ISO,IMP IGI,IMP,IMP IBA,IDA IMP ISO TAS,IMP IBA,IDA ISS ISO IBA,IDA IMP ISS ISO IBA,ISS,ISO,ISO,IBA,IBA,IBA,IMP,IBA NAS,ISO IBA,IMP,IDA IMP ISO IBA,ISS,IMP,ISS,IBA,IBA,ISO IBA NAS,IBA,IBA,ISS,ISO,IBA,NAS,ISO,IDA,IDA IMP…	Exoc6b,Cacna1i,Ntn1,Kpna4,Kpna6,Cdk5r2,Gosr1,Pomc,Mb,Ap2a2,Kif5c,Ptpn6,Ptpn11,Cd81,Tyro3,Opa1,Timm10,Adcyap1r1,Nos3,Cacna1c,Prkcz,Anxa7,Nr1d1,Slc25a31,Lrrk2,Arcn1,Crhbp,Abcg1,Ripor1,Cyfip1,Fbxo11,Ano10,Slc9a7,Srp68,Tsku,Gle1,Slco3a1,Bloc1s4,Dtnbp1,Gorasp1,Neurl1a,Plpp3,Grpel1,Zdhhc6,Chmp3,Immp1l,Tomm34,Cmtm6,Atp5f1d,Golga7b,Borcs8,Appbp2,Crot,Slc23a2,Syt13,Pfn2,Selenok,Cln8,Timm9,Bnip3l	0.016
13	query_1	TRUE	0.0112636	952	193	24	0.124352	0.0252101	GO:0000902	GO:BP	cell morphogenesis	21165	238	GO:0009653	ISS ISO,IDA IMP ISO IBA,IBA,IMP,IMP IBA,IGI,IMP IGI,ISO,IBA,IGI,IMP,IDA IBA,IGI ISS ISO,IMP ISS ISO IBA,IMP,IMP,IDA,IDA IMP ISO,ISS ISO,IMP,IBA,ISO,ISO,IMP IBA	Farp1,Ntn1,Cdk5r2,Ndn,Kif5c,Ptpn6,Ptpn11,Opa1,Cdh10,Prkcz,Anxa7,Myo16,Lrrk2,Cyfip1,Tctn1,Tsku,Ablim1,Dtnbp1,Gorasp1,Srgap2,Chodl,Slc23a2,Stk4,Ulk2	0.025
14	query_1	TRUE	0.0165708	5528	193	78	0.404145	0.01411	GO:0016043	GO:BP	cellular component organization	21165	5053	GO:0071840	NAS,IGI ISS ISO,IMP,EXP IDA IMP ISS ISO IBA,IGI,IBA,IBA,TAS,IGI ISS,IMP,IDA ISO IC,IMP IBA,IMP ISO,IDA IMP IGI,ISO,IDA IMP ISS ISO IBA NAS,IDA IBA,IBA,IDA IMP IBA,IMP IGI,IMP ISO,IDA IMP IGI IBA,IMP,IMP IBA,IDA IBA,IDA IMP IGI ISS ISO IC,IMP ISO,IBA,IBA,IDA IMP IBA,IMP IBA,IDA IMP ISS ISO IBA,IDA IBA TAS,IBA NAS,IDA ISO,ISS IBA,IMP IBA,IMP,ISO,IDA ISO IBA,IBA,ISS,IBA,IBA,IMP NAS,ISS IBA,IMP IBA,I…	Exoc6b,Farp1,Ro60,Ntn1,Gclm,Cdk5r2,Gosr1,Lsp1,Pcgf2,Ndn,Fas,Kif5c,Ptpn11,Crkl,Pkm,Opa1,Timm10,Tuba4a,Cdh10,Prkcz,Anxa7,Dok7,Pip4p1,Slc25a31,Myo16,Lrrk2,Abcg1,Isy1,Dusp23,Mtss2,Ranbp10,Cyfip1,Actn1,Gtf2a2,Atcay,Ttc12,Tctn1,Tsku,Gatad2a,Ablim1,Znfx1,Tcf25,Rttn,Tapbpl,Bloc1s4,Chchd6,Brk1,Cbr4,Dtnbp1,Gorasp1,Srgap2,Med28,Sh3bp4,Prpf3,Neurl1a,Smc6,Atad3a,Eps8l2,Stk24,Chmp3,Fmc1,Chodl,Tbcb,Atp5f1d,Clvs…	0.014
15	query_1	TRUE	0.0230917	1201	193	27	0.139896	0.0224813	GO:0048666	GO:BP	neuron development	21165	12757	GO:0030182, GO:0048468	ISS ISO,IDA IMP ISO IBA,IBA,IMP,ISO,IMP IBA,IMP,IGI,ISO,IGI,IDA IBA,IGI ISS ISO,IMP ISS ISO IBA,IDA ISO,IMP,IMP,IDA,NAS,IDA IMP ISS ISO IBA NAS,ISS ISO,IMP,IDA,ISO,IGI IBA,IMP,ISO,IMP IBA	Farp1,Ntn1,Cdk5r2,Ndn,Fas,Kif5c,Ptpn11,Crkl,Opa1,Prkcz,Myo16,Lrrk2,Cyfip1,Atcay,Tctn1,Tsku,Ablim1,Bloc1s4,Dtnbp1,Gorasp1,Srgap2,Neurl1a,Stk24,Chodl,Efhd1,Slc23a2,Ulk2	0.022
16	query_1	TRUE	0.0252332	1207	193	27	0.139896	0.0223695	GO:0045184	GO:BP	establishment of protein localization	21165	11159	GO:0008104, GO:0051234	IDA ISO IBA,IDA ISS IBA,TAS,ISS ISO,IMP,ISS,IDA IBA,IMP ISO,ISO,IMP IGI,IMP,IDA IMP,ISO,ISS,IBA,IMP,ISS,IBA,IBA,IBA,IBA,IBA,ISS,IBA,IMP,IDA,IGI	Kpna4,Kpna6,Ap2a2,Kif5c,Ptpn11,Cd81,Timm10,Cacna1c,Prkcz,Anxa7,Nr1d1,Lrrk2,Abcg1,Ripor1,Srp68,Dtnbp1,Gorasp1,Grpel1,Zdhhc6,Chmp3,Immp1l,Tomm34,Cmtm6,Golga7b,Selenok,Timm9,Bnip3l	0.022
17	query_1	TRUE	0.0282471	3037	193	50	0.259067	0.0164636	GO:0006950	GO:BP	response to stress	21165	2571	GO:0050896	IMP IBA,IMP ISS ISO,IMP,IMP,IMP,IMP,IMP ISS ISO,IMP,IDA,ISO IBA,IDA IMP,IMP,IMP,IEP,IMP,IMP IGI IBA,IMP,ISO,IMP,ISS,IMP IBA,IMP,ISO,ISS ISO,ISS,ISS,ISS,IDA IBA,IMP ISS IBA NAS,IMP,IMP ISS,IMP ISS,IBA,IMP,ISS IBA,IMP,ISS IBA,ISS,ISS ISO,ISO,IBA,ISS,IMP ISS,IMP,IDA IBA,ISO NAS,IBA,NAS,ISO,ISS ISO IBA	Wdfy1,Gclm,Ddt,Kpna4,Kpna6,Pld3,Mb,Lsp1,Pcgf2,Fas,Ptpn6,Ptpn11,Cd81,Acvr1,Nek1,Tyro3,Opa1,Adcyap1r1,Anxa7,Pip4p1,Tmem109,Nr1d1,Lrrk2,Crhbp,Ripor1,Pdk1,Serinc5,Gbp9,Casp9,Tsku,Znfx1,Tmx1,Gtf2h3,Bloc1s4,Chchd6,Dtnbp1,Smc6,Atad3a,Stk24,Chmp3,Rpa3,Efhd1,Map3k20,Selenok,Ulk2,Morf4l2,Ccs,Smarcb1,Ehmt2,Bnip3l	0.016
18	query_1	TRUE	0.0319937	18	193	4	0.0207254	0.222222	GO:1903911	GO:BP	positive regulation of receptor clustering	21165	23031	GO:0043113, GO:1903909, GO:1905477	IGI,IMP ISS,IDA IMP IGI,IDA IMP IGI	Farp1,Cd81,Crkl,Dok7	0.222
19	query_1	TRUE	0.0335657	61	193	6	0.0310881	0.0983607	GO:0006626	GO:BP	protein targeting to mitochondrion	21165	2332	GO:0006605, GO:0072655	IDA IBA,IBA,IBA,IBA,IDA,IGI	Timm10,Grpel1,Immp1l,Tomm34,Timm9,Bnip3l	0.098
20	query_1	TRUE	0.0355345	2307	193	41	0.212435	0.017772	GO:0033036	GO:BP	macromolecule localization	21165	7939	GO:0051179	IGI,IDA ISO IBA,IDA ISS IBA,IMP IBA,TAS,IMP ISS ISO,IMP,IMP ISS,IDA IMP IGI,IDA IBA,IMP ISO,IMP ISO,IMP IGI,IDA IMP IGI,IMP,IDA IMP,IDA IMP ISS ISO IBA,ISS,ISS,IBA,ISO,IMP IBA,IMP,ISO,IBA,ISO IBA,IMP,ISS,ISS,IBA,IBA,IBA,IBA,IBA,ISS,IBA,IDA,IMP,IGI,IDA,IGI	Farp1,Kpna4,Kpna6,Pomc,Ap2a2,Kif5c,Ptpn11,Cd81,Crkl,Timm10,Cacna1c,Prkcz,Anxa7,Dok7,Nr1d1,Lrrk2,Abcg1,Ripor1,Atcay,Srp68,Neto2,Tctn1,Tsku,Ubac2,Gle1,Slco3a1,Dtnbp1,Gorasp1,Sh3bp4,Grpel1,Zdhhc6,Chmp3,Immp1l,Tomm34,Cmtm6,Golga7b,Crot,Selenok,Ulk2,Timm9,Bnip3l	0.018
21	query_1	TRUE	0.0487197	96	193	7	0.0362694	0.0729167	GO:0007006	GO:BP	mitochondrial membrane organization	21165	2605	GO:0007005, GO:0061024	IDA IMP ISS,IDA IBA,IMP IBA,ISS IBA,IMP,IDA,ISO IBA	Opa1,Timm10,Slc25a31,Chchd6,Cln8,Timm9,Bnip3l	0.073
22	query_1	TRUE	6.99e-17	8807	193	143	0.740933	0.0162371	GO:0005737	GO:CC	cytoplasm	20820	304	GO:0005622, GO:0110165	ISS,ISO,IBA NAS,ISO IBA,IDA IBA,ISS ISO,IDA,IDA,IDA ISO IBA,NAS,NAS,IDA ISS TAS,IDA ISO IBA,IBA TAS,IBA,IDA ISO IBA,IDA IBA,ISS,IDA HDA ISS ISO IBA,ISO IBA,ISO IBA,IDA ISO IBA TAS NAS,IDA IBA,IDA,ISO,IDA ISO,IDA IBA TAS,IDA ISO IBA,ISS IBA TAS,IBA,IBA TAS,ISS IBA,ISO,IDA HDA IBA,ISS ISO,HDA,HDA ISS NAS,IDA IMP HDA ISS ISO IBA,IDA HDA IBA,ISO IBA TAS,IBA,ISO,IDA ISO IBA IC,IDA,IDA ISO,IDA ISO,IDA …	Dhtkd1,Fbxl16,Exoc6b,Pigg,Wdfy1,Farp1,Ro60,Ntn1,Gclm,Kpna4,Kpna6,Pld3,Cdk5r2,Nmt2,Dhcr7,Gosr1,Pomc,Mb,Got2,Klk1,Klk1b22,Ap2a2,Tpi1,Ndn,Fas,Kif5c,Ptpn6,Prkar2b,Ptpn11,Por,Crkl,Impdh1,Nek1,Pkm,Tyro3,Acyp2,Mrps21,Opa1,Timm10,Prkacb,Tuba4a,Adcyap1r1,Nos3,Smad5,Cacna1c,Prkcz,Anxa7,Pip4p1,Tmem109,Arglu1,Prrc1,Nr1d1,Slc25a31,Myo16,Lrrk2,Arcn1,Crhbp,Abcg1,Ripor1,Dusp23,Mtss2,Myh14,Ranbp10,Cyfip1,Actn1,Pd…	0.016
23	query_1	TRUE	1.28e-16	12132	193	169	0.875648	0.0139301	GO:0005622	GO:CC	intracellular anatomical structure	20820	232	GO:0110165	ISS,ISO,IBA NAS,IBA,ISO IBA,IDA IBA,IBA,ISS ISO,IDA,IDA,IDA ISO IBA,IDA IBA NAS,IBA NAS,IDA ISS TAS,IDA ISO IBA,IBA TAS,IBA,IDA ISO IBA,IDA IBA,ISS,IDA HDA ISS ISO IBA,ISO IBA,ISO IBA,IDA ISO IBA TAS NAS,IDA IBA,IDA ISS IBA TAS,IDA IBA,ISO,IDA ISS ISO IBA TAS,IDA IBA TAS,IDA ISO IBA,ISS IBA TAS,IBA,IBA TAS,ISS IBA,IDA ISO,IDA HDA ISS IBA,ISS ISO,HDA,HDA ISS NAS,IDA IMP HDA ISS ISO IBA,IBA,IDA HDA…	Dhtkd1,Fbxl16,Exoc6b,Rsbn1l,Pigg,Wdfy1,Nfxl1,Farp1,Ro60,Ntn1,Gclm,Kpna4,Kpna6,Pld3,Cdk5r2,Nmt2,Dhcr7,Gosr1,Pomc,Mb,Got2,Klk1,Klk1b22,Ap2a2,Tpi1,Pcgf2,Ndn,Fas,Kif5c,Ptpn6,Prkar2b,Ptpn11,Por,Crkl,Impdh1,Nek1,Pkm,Tyro3,Acyp2,Mrps21,Opa1,Gmeb2,Timm10,Prkacb,Tuba4a,Adcyap1r1,Nos3,Hnrnph2,Smad5,Cacna1c,Prkcz,Anxa7,Pip4p1,Tmem109,Spout1,Arglu1,Prrc1,Nr1d1,Slc25a31,Klhdc2,Myo16,Lrrk2,Arcn1,Crhbp,Rai1,Abc…	0.014
24	query_1	TRUE	3.61e-10	10832	193	148	0.766839	0.0136632	GO:0043226	GO:CC	organelle	20820	1840	GO:0110165	ISS,IBA,ISO IBA,IDA IBA,IBA,IDA,IDA IBA NAS,IBA NAS,IDA ISS TAS,IBA,IDA ISO IBA,IDA IBA,IDA HDA ISS ISO IBA,ISO IBA,ISO IBA,IDA ISO IBA TAS NAS,IDA ISS IBA TAS,IDA IBA,ISO,IDA ISS IBA TAS,IDA,ISS,ISS,IDA ISO,IDA HDA ISS,ISS ISO,HDA,HDA ISS NAS,IDA IMP HDA ISS ISO IBA,IBA,IDA HDA IBA,IDA IBA,IBA,ISO,IDA ISO IBA,ISS ISO IBA,ISO,IDA IBA,IDA ISO,IDA IGI ISO,IDA IBA,IDA IBA,ISS ISO,ISS IBA,IBA,ISS,IDA…	Dhtkd1,Rsbn1l,Pigg,Wdfy1,Nfxl1,Ro60,Kpna4,Kpna6,Pld3,Dhcr7,Gosr1,Pomc,Got2,Klk1,Klk1b22,Ap2a2,Pcgf2,Ndn,Fas,Kif5c,Prkar2b,Ptpn11,Impdh1,Nek1,Pkm,Tyro3,Acyp2,Mrps21,Opa1,Gmeb2,Timm10,Prkacb,Tuba4a,Adcyap1r1,Nos3,Hnrnph2,Cdh10,Smad5,Cacna1c,Prkcz,Anxa7,Pip4p1,Tmem109,Spout1,Arglu1,Prrc1,Nr1d1,Slc25a31,Klhdc2,Myo16,Lrrk2,Arcn1,Crhbp,Rai1,Abcg1,Ripor1,Isy1,Mtss2,Myh14,Ranbp10,Actn1,Gtf2a2,Pdk1,Fam210…	0.014
25	query_1	TRUE	2.21e-09	16741	193	187	0.968912	0.0111702	GO:0110165	GO:CC	cellular anatomical structure	20820	3368	GO:0005575	IBA,ISS,ISO,IBA NAS,IBA,ISO IBA,IDA ISS IBA,ISA IBA,IDA IBA,IBA,IBA,ISS ISO,IDA,IDA HDA ISS ISO IBA TAS,IDA ISO IBA,IDA IBA,IDA IBA NAS,IBA NAS,IDA ISS TAS,IDA IEP ISO IBA,IBA TAS,IBA,IDA ISO IBA,IDA ISS ISO IBA TAS,ISS,IDA HDA ISS ISO IBA,ISO IBA,ISO IBA,IDA ISO IBA TAS NAS,IDA IBA,IDA ISS IBA TAS,IDA IBA,IDA ISO IBA,ISO,IDA ISS ISO IBA TAS,IDA ISO IBA TAS,IDA IMP ISO IBA,ISS ISO IBA TAS,IDA ISS…	Gm5938,Dhtkd1,Fbxl16,Exoc6b,Rsbn1l,Pigg,Pcdh10,Or51v14,Wdfy1,Cacna1i,Nfxl1,Farp1,Ro60,Ntn1,Gclm,Ddt,Kpna4,Kpna6,Pld3,Cdk5r2,Nmt2,Dhcr7,Gosr1,Pomc,Mb,Got2,Klk1,Klk1b22,Ap2a2,Tpi1,Pcgf2,Ndn,Fas,Klkb1,Kif5c,Ptpn6,Prkar2b,Ptpn11,Cd81,Por,Acvr1,Crkl,Impdh1,Nek1,Pkm,Tyro3,Acyp2,Mrps21,Opa1,Gmeb2,Timm10,Prkacb,Tuba4a,Adcyap1r1,Nos3,Hnrnph2,Cdh10,Smad5,Cacna1c,Prkcz,Anxa7,Dok7,Pip4p1,2510002D24Rik,Tmem10…	0.011
26	query_1	TRUE	1.61e-08	10425	193	141	0.73057	0.0135252	GO:0043229	GO:CC	intracellular organelle	20820	1843	GO:0005622, GO:0043226	ISS,IBA,ISO IBA,IDA IBA,IBA,IDA,IDA IBA NAS,IBA NAS,IDA ISS TAS,IBA,IDA ISO IBA,IDA IBA,IDA HDA ISS ISO IBA,ISO IBA,ISO IBA,IDA ISO IBA TAS NAS,IDA ISS IBA TAS,IDA IBA,ISO,IDA ISS IBA TAS,ISS,ISS,IDA ISO,IDA HDA ISS,ISS ISO,HDA,HDA ISS NAS,IDA IMP HDA ISS ISO IBA,IBA,IDA HDA IBA,IBA,IBA,ISO,IDA ISO IBA,ISS IBA,IDA IBA,IDA ISO,IDA IGI ISO,IDA IBA,IDA IBA,ISS ISO,ISS IBA,IBA,ISS,IDA IBA TAS,IMP HDA…	Dhtkd1,Rsbn1l,Pigg,Wdfy1,Nfxl1,Ro60,Kpna4,Kpna6,Pld3,Dhcr7,Gosr1,Pomc,Got2,Klk1,Klk1b22,Ap2a2,Pcgf2,Ndn,Fas,Kif5c,Ptpn11,Impdh1,Nek1,Pkm,Tyro3,Acyp2,Mrps21,Opa1,Gmeb2,Timm10,Prkacb,Tuba4a,Adcyap1r1,Nos3,Hnrnph2,Smad5,Cacna1c,Prkcz,Anxa7,Pip4p1,Tmem109,Spout1,Arglu1,Prrc1,Nr1d1,Slc25a31,Klhdc2,Myo16,Lrrk2,Arcn1,Crhbp,Rai1,Abcg1,Ripor1,Isy1,Mtss2,Myh14,Ranbp10,Actn1,Gtf2a2,Pdk1,Fam210a,Ptbp3,Atcay,…	0.014
27	query_1	TRUE	8.36e-08	4645	193	82	0.42487	0.0176534	GO:0032991	GO:CC	protein-containing complex	20820	1311	GO:0005575	IBA,IBA NAS,IBA,IDA ISS IBA,IDA ISO IBA,ISO,ISO,IBA,ISO,IDA ISO IBA NAS,IDA ISS IBA,IDA,IDA ISO IBA,ISS IBA TAS,IDA,IDA ISO IBA,ISO,ISO IBA,IDA,ISO,IBA,ISS NAS,IDA,ISO IBA TAS,ISO,ISO IBA,IBA,ISO IBA,IDA IMP ISS ISO IBA TAS,IMP,ISS,ISO IBA,IDA,IBA,ISS IBA,IDA IBA,IBA,ISO IBA,IDA ISO,IBA,ISS IBA,IDA IBA,IBA,ISS IBA NAS,ISO,IBA,IBA NAS,ISS IBA,IBA,ISS IBA,IBA,IDA IBA,IDA ISO IBA,IBA,ISS,IDA ISS ISO…	Fbxl16,Exoc6b,Cacna1i,Ro60,Gclm,Kpna4,Kpna6,Gosr1,Got2,Ap2a2,Pcgf2,Ndn,Fas,Kif5c,Ptpn6,Prkar2b,Ptpn11,Acvr1,Crkl,Pkm,Tyro3,Mrps21,Timm10,Prkacb,Adcyap1r1,Hnrnph2,Cdh10,Smad5,Cacna1c,Slc25a31,Klhdc2,Myo16,Lrrk2,Arcn1,Isy1,Myh14,Cyfip1,Gtf2a2,Pdk1,Srp68,Mon1b,Tctn1,Aqr,Gatad2a,Aldh1l1,Znfx1,Gle1,Tcf25,Tapbpl,Gtf2h3,Ubac1,Psmd2,Bloc1s4,Brk1,Cbr4,Dtnbp1,Med28,Gmppa,Prpf3,Smc6,Stk24,Grpel1,Rnps1,Chmp3…	0.018
28	query_1	TRUE	8.92e-08	9825	193	134	0.694301	0.0136387	GO:0043227	GO:CC	membrane-bounded organelle	20820	1841	GO:0043226	ISS,IBA,ISO IBA,IDA IBA,IBA,IDA,IDA IBA NAS,IBA NAS,IDA ISS TAS,IBA,IDA ISO IBA,IDA IBA,IDA HDA ISS ISO IBA,ISO IBA,ISO IBA,IDA ISO IBA TAS NAS,IDA ISS IBA TAS,IDA IBA,ISO,IDA,IDA,ISS,ISS,IDA ISO,IDA HDA ISS,ISS ISO,HDA,HDA ISS NAS,IDA IMP HDA ISS ISO IBA,IBA,IDA HDA IBA,IDA IBA,ISO,IDA ISO IBA,ISS IBA,IDA IBA,IDA,IDA IBA,IDA IBA,ISS ISO,IBA,ISS,IDA IBA TAS,IMP HDA,ISS,ISS ISO IBA,IDA,IDA IBA,IDA…	Dhtkd1,Rsbn1l,Pigg,Wdfy1,Nfxl1,Ro60,Kpna4,Kpna6,Pld3,Dhcr7,Gosr1,Pomc,Got2,Klk1,Klk1b22,Ap2a2,Pcgf2,Ndn,Fas,Kif5c,Prkar2b,Ptpn11,Impdh1,Nek1,Pkm,Tyro3,Acyp2,Mrps21,Opa1,Gmeb2,Timm10,Prkacb,Adcyap1r1,Nos3,Hnrnph2,Smad5,Prkcz,Anxa7,Pip4p1,Tmem109,Arglu1,Prrc1,Nr1d1,Slc25a31,Klhdc2,Myo16,Lrrk2,Arcn1,Crhbp,Rai1,Abcg1,Ripor1,Isy1,Actn1,Gtf2a2,Pdk1,Fam210a,Ptbp3,Atcay,Bmp3,Serinc5,Slc9a7,Srp68,Mon1b,Gb…	0.014
29	query_1	TRUE	1.52e-07	9333	193	129	0.668394	0.0138219	GO:0043231	GO:CC	intracellular membrane-bounded organelle	20820	1845	GO:0043227, GO:0043229	ISS,IBA,ISO IBA,IDA IBA,IBA,IDA,IDA IBA NAS,IBA NAS,IDA ISS TAS,IBA,IDA ISO IBA,IDA IBA,IDA HDA ISS ISO IBA,ISO IBA,ISO IBA,IDA ISO IBA TAS NAS,IDA ISS IBA TAS,IDA IBA,ISO,ISS,ISS,IDA ISO,IDA HDA ISS,ISS ISO,HDA,HDA ISS NAS,IDA IMP HDA ISS ISO IBA,IBA,IDA HDA IBA,IBA,ISO,IDA ISO IBA,ISS IBA,IDA IBA,IDA,IDA IBA,IDA IBA,ISS ISO,IBA,ISS,IDA IBA TAS,IMP HDA,ISS,ISS ISO IBA,IDA,IDA IBA,IDA ISS ISO,IDA…	Dhtkd1,Rsbn1l,Pigg,Wdfy1,Nfxl1,Ro60,Kpna4,Kpna6,Pld3,Dhcr7,Gosr1,Pomc,Got2,Klk1,Klk1b22,Ap2a2,Pcgf2,Ndn,Fas,Ptpn11,Impdh1,Nek1,Pkm,Tyro3,Acyp2,Mrps21,Opa1,Gmeb2,Timm10,Prkacb,Adcyap1r1,Nos3,Hnrnph2,Smad5,Prkcz,Anxa7,Pip4p1,Tmem109,Arglu1,Prrc1,Nr1d1,Slc25a31,Klhdc2,Myo16,Lrrk2,Arcn1,Crhbp,Rai1,Abcg1,Ripor1,Isy1,Actn1,Gtf2a2,Pdk1,Fam210a,Ptbp3,Atcay,Serinc5,Slc9a7,Srp68,Mon1b,Gbp9,Casp9,Aqr,Gatad2…	0.014
30	query_1	TRUE	8.17e-06	1548	193	38	0.196891	0.0245478	GO:0005739	GO:CC	mitochondrion	20820	305	GO:0005737, GO:0043231	ISS,IDA HDA ISS ISO IBA,HDA,HDA,HDA ISS NAS,IDA IMP HDA ISS ISO IBA,IDA HDA IBA,IBA,IMP HDA,IDA,HDA IBA,IDA HDA IBA,IDA,ISS IBA,HDA,IDA,ISS IBA,HDA ISS,HDA,IDA HDA IBA,IDA,HDA IBA,IDA IBA,HDA IBA,HDA IBA NAS,HDA IBA,HDA ISS IBA NAS,HDA IBA,HDA ISS IBA,HDA ISS IBA NAS,HDA ISO,IDA HDA IBA,IDA HDA ISO,HDA IBA,HDA,TAS,IDA HDA,IDA HDA ISS IBA	Dhtkd1,Got2,Pkm,Acyp2,Mrps21,Opa1,Timm10,Arglu1,Slc25a31,Lrrk2,Pdk1,Fam210a,Atcay,Cmc2,Aldh1l1,Znfx1,Chchd6,Cbr4,Srgap2,Atad3a,Dhrs4,Grpel1,Immp1l,Fmc1,Gadd45gip1,Ears2,Mrps28,Tomm34,Wars2,Mrpl19,Atp5f1d,Efhd1,Ndufb8,Bola1,Crot,Ccs,Timm9,Bnip3l	0.025
31	query_1	TRUE	1.15e-05	929	193	28	0.145078	0.0301399	GO:0031967	GO:CC	organelle envelope	20820	1187	GO:0043227, GO:0043229, GO:0110165	HDA ISO,ISS ISO,HDA NAS,IDA IMP HDA ISS ISO IBA,IDA IBA,IDA,IDA,ISO,IMP HDA,IDA,IDA,IDA,ISO IBA NAS,ISS,HDA,HDA,IBA,ISO,IBA,NAS,NAS,NAS,HDA ISO,IDA IBA,HDA ISO,TAS,IDA,ISS IBA	Got2,Tyro3,Mrps21,Opa1,Timm10,Prkcz,Anxa7,Tmem109,Slc25a31,Lrrk2,Atcay,Znfx1,Gle1,Chchd6,Srgap2,Atad3a,Grpel1,Chmp3,Immp1l,Gadd45gip1,Mrps28,Mrpl19,Atp5f1d,Efhd1,Ndufb8,Ccs,Timm9,Bnip3l	0.03
32	query_1	TRUE	5.11e-05	648	193	22	0.11399	0.0339506	GO:0005740	GO:CC	mitochondrial envelope	20820	306	GO:0005739, GO:0031967	HDA ISO,HDA NAS,IDA IMP HDA ISS ISO IBA,IDA IBA,IMP HDA,IDA,IDA,IDA,ISS,HDA,HDA,IBA,IBA,NAS,NAS,NAS,HDA ISO,IDA IBA,HDA ISO,TAS,IDA,ISS IBA	Got2,Mrps21,Opa1,Timm10,Slc25a31,Lrrk2,Atcay,Znfx1,Chchd6,Srgap2,Atad3a,Grpel1,Immp1l,Gadd45gip1,Mrps28,Mrpl19,Atp5f1d,Efhd1,Ndufb8,Ccs,Timm9,Bnip3l	0.034
33	query_1	TRUE	0.000236452	439	193	17	0.0880829	0.0387244	GO:0005743	GO:CC	mitochondrial inner membrane	20820	309	GO:0019866, GO:0031966	HDA ISO,HDA NAS,IDA IMP HDA ISS ISO,IBA,HDA,IDA,ISS,HDA,HDA,IBA,IBA,NAS,NAS,NAS,HDA ISO,IDA IBA,HDA ISO	Got2,Mrps21,Opa1,Timm10,Slc25a31,Lrrk2,Chchd6,Srgap2,Atad3a,Grpel1,Immp1l,Gadd45gip1,Mrps28,Mrpl19,Atp5f1d,Efhd1,Ndufb8	0.039
34	query_1	TRUE	0.000243954	598	193	20	0.103627	0.0334448	GO:0031966	GO:CC	mitochondrial membrane	20820	1186	GO:0005740, GO:0031090	HDA ISO,HDA NAS,IDA IMP HDA ISS ISO IBA,IBA,HDA,IDA,IDA,IDA,ISS,HDA,HDA,IBA,IBA,NAS,NAS,NAS,HDA ISO,IDA IBA,HDA ISO,ISS IBA	Got2,Mrps21,Opa1,Timm10,Slc25a31,Lrrk2,Atcay,Znfx1,Chchd6,Srgap2,Atad3a,Grpel1,Immp1l,Gadd45gip1,Mrps28,Mrpl19,Atp5f1d,Efhd1,Ndufb8,Bnip3l	0.033
35	query_1	TRUE	0.000438867	2112	193	42	0.217617	0.0198864	GO:0031090	GO:CC	organelle membrane	20820	1017	GO:0016020, GO:0043227	IBA,IDA ISS TAS,IBA,IDA IBA,HDA ISO,IDA ISO IBA NAS,ISS ISO,HDA NAS,IDA IMP HDA ISS ISO IBA,IBA,IBA,IDA IBA,ISS ISO,HDA,IDA,IBA,TAS,IDA,ISS,IDA,ISS,IBA,ISS,IDA ISS ISO IBA,HDA,HDA,ISS ISO,ISO,IBA,ISO IBA,IBA,NAS,NAS,ISS,NAS,HDA ISO,IDA IBA,HDA ISO,NAS,ISO,IDA ISO IBA,ISS IBA	Pigg,Pld3,Dhcr7,Gosr1,Got2,Ap2a2,Tyro3,Mrps21,Opa1,Timm10,Anxa7,Pip4p1,Tmem109,Slc25a31,Lrrk2,Arcn1,Actn1,Atcay,Slc9a7,Znfx1,Tmx1,Tapbpl,Chchd6,Dtnbp1,Srgap2,Atad3a,Plpp3,Stk24,Grpel1,Chmp3,Immp1l,Gadd45gip1,Mrps28,Cmtm6,Mrpl19,Atp5f1d,Efhd1,Ndufb8,Borcs8,Appbp2,Selenok,Bnip3l	0.02
36	query_1	TRUE	0.000617095	471	193	17	0.0880829	0.0360934	GO:0019866	GO:CC	organelle inner membrane	20820	800	GO:0031090, GO:0031967	HDA ISO,HDA NAS,IDA IMP HDA ISS ISO,IBA,HDA,IDA,ISS,HDA,HDA,IBA,IBA,NAS,NAS,NAS,HDA ISO,IDA IBA,HDA ISO	Got2,Mrps21,Opa1,Timm10,Slc25a31,Lrrk2,Chchd6,Srgap2,Atad3a,Grpel1,Immp1l,Gadd45gip1,Mrps28,Mrpl19,Atp5f1d,Efhd1,Ndufb8	0.036
37	query_1	TRUE	0.00428493	154	193	9	0.0466321	0.0584416	GO:0098798	GO:CC	mitochondrial protein-containing complex	20820	3190	GO:0005739, GO:0032991	ISS NAS,IDA,IMP,IBA,IBA,NAS,ISS IBA NAS,ISS IBA NAS,IDA	Mrps21,Timm10,Slc25a31,Grpel1,Immp1l,Gadd45gip1,Mrps28,Mrpl19,Timm9	0.058
38	query_1	TRUE	0.0074653	1438	193	30	0.15544	0.0208623	GO:1902494	GO:CC	catalytic complex	20820	3602	GO:0032991	IBA,IDA ISO IBA,IDA ISS IBA,IDA ISO IBA,ISO,ISO,ISO IBA TAS,ISS,ISS IBA,ISO IBA,IDA ISO,IBA,ISS IBA NAS,IBA,ISS IBA,IBA,IDA IBA,ISS,ISS,IDA ISS IBA,IBA,ISS IBA,ISS,ISS ISO,IBA,IBA,ISS IBA,IMP,ISO IBA,IDA ISO IBA NAS	Fbxl16,Gclm,Pcgf2,Prkar2b,Acvr1,Pkm,Prkacb,Klhdc2,Isy1,Gtf2a2,Pdk1,Aqr,Gatad2a,Znfx1,Gtf2h3,Ubac1,Psmd2,Cbr4,Gmppa,Smc6,Immp1l,Lage3,Naa38,Atp5f1d,Golga7b,Ndufb8,Appbp2,Plod1,Morf4l2,Smarcb1	0.021
39	query_1	TRUE	0.0318485	836	193	20	0.103627	0.0239234	GO:0098794	GO:CC	postsynapse	20820	3187	GO:0045202, GO:0110165	IDA,ISO,ISO,IDA IMP ISO,IDA,ISO,ISO,ISO,ISO,IDA,IDA,IDA ISO,ISO,IDA IEP ISO IBA,IDA IEP IBA,IDA IEP,IDA ISO,IDA ISS,IDA IEP IBA,IDA	Pcdh10,Farp1,Kif5c,Prkar2b,Crkl,Hnrnph2,Cdh10,Cacna1c,Prkcz,Dok7,Nr1d1,Cyfip1,Actn1,Dlgap2,Neto2,Ablim1,Dtnbp1,Srgap2,Neurl1a,Pfn2	0.024
40	query_1	TRUE	0.0469352	2992	193	47	0.243523	0.0157086	GO:0012505	GO:CC	endomembrane system	20820	666	GO:0110165	ISO IBA,IDA IBA,IDA ISS TAS,IBA,IDA ISO IBA,IDA IBA,ISO IBA,ISO IBA,IDA ISO IBA TAS NAS,ISO,IDA,ISS ISO,ISO,IDA,IDA,IDA IBA,ISS ISO,ISS,IDA,IDA IBA,ISS ISO,IDA,ISS,TAS NAS,IDA,ISS IBA,ISS IBA,ISO,ISO IBA NAS,ISS IBA,IBA,IDA ISS ISO IBA,IDA IBA,ISS ISO,ISO IBA,ISS IBA,ISO IBA,ISS,ISS ISO IBA,IBA,IDA,IBA,IDA ISO IBA,IDA ISS IBA,IBA,ISS IBA,IBA	Pigg,Wdfy1,Pld3,Dhcr7,Gosr1,Pomc,Klk1,Klk1b22,Ap2a2,Fas,Pkm,Tyro3,Adcyap1r1,Prkcz,Anxa7,Pip4p1,Tmem109,Prrc1,Lrrk2,Arcn1,Crhbp,Abcg1,Ripor1,Actn1,Serinc5,Slc9a7,Mon1b,Ubac2,Gle1,Tmx1,Tapbpl,Dtnbp1,Gorasp1,Plpp3,Stk24,Zdhhc6,Chmp3,Cmtm6,Clvs1,Dennd6b,Prxl2b,Syt13,Selenok,Cln8,Plod1,Srd5a3,Bnip3l	0.016
41	query_1	TRUE	0.00252071	11009	181	127	0.701657	0.011536	GO:0005488	GO:MF	binding	20512	1450	GO:0003674	IBA,IPI,IBA,IGI ISS ISO IBA,IDA ISO IBA,IPI,IDA IPI ISS ISO,IPI,IPI IBA,IPI IBA,IPI IBA TAS,ISS,IDA IPI ISS IBA,ISO IBA,ISO,IPI,IPI ISO,IPI ISS,TAS,IDA IPI IBA,IDA IPI,IDA IPI ISS ISO,IPI ISO IBA,IDA IPI ISO IBA,IPI ISO IBA,IPI ISO IBA,IPI ISS,ISO IBA,IDA IPI IBA,IPI ISO IBA,ISS,IDA,IDA IPI ISS ISO,IPI ISS ISO,IPI ISS ISO IBA,IBA,IDA,IPI IBA,IPI ISO IBA,IPI ISO IBA,IBA,IBA,IDA IPI IBA,IPI ISS ISO…	Gm5938,Wdfy1,Nfxl1,Farp1,Ro60,Ntn1,Gclm,Ddt,Kpna4,Kpna6,Cdk5r2,Dhcr7,Pomc,Mb,Got2,Cd44,Ap2a2,Tpi1,Lsp1,Pcgf2,Ndn,Fas,Kif5c,Ptpn6,Prkar2b,Ptpn11,Cd81,Por,Acvr1,Crkl,Impdh1,Nek1,Pkm,Tyro3,Opa1,Gmeb2,Prkacb,Tuba4a,Adcyap1r1,Nos3,Hnrnph2,Cdh10,Smad5,Cacna1c,Prkcz,Anxa7,Dok7,Pip4p1,2510002D24Rik,Tmem109,Spout1,Prrc1,Nr1d1,Gpr149,Klhdc2,Myo16,Lrrk2,Crhbp,Abcg1,Ripor1,Mtss2,Myh14,Ranbp10,Cyfip1,Fbxo11,A…	0.012
42	query_1	TRUE	0.00262189	1027	181	25	0.138122	0.0243427	GO:0043168	GO:MF	anion binding	20512	5225	GO:0043167	IGI ISS ISO IBA,ISO,ISO IBA,ISO IBA,ISO,ISS,IDA,IBA,IBA,ISO,IDA,IDA,IDA,ISO,IBA,ISO,IBA,ISS,ISS,IBA,ISO,ISS,ISS,IDA,ISO	Farp1,Got2,Prkar2b,Por,Pkm,Opa1,Prkacb,Tuba4a,Nos3,Lrrk2,Mtss2,Myh14,Ranbp10,Pdk1,Gbp9,Dpyd,Gle1,Cbr4,Sh3bp4,Grpel1,Chmp3,Clvs1,Dennd6b,Map3k20,Plod1	0.024
43	query_1	TRUE	0.00337572	7643	181	97	0.535912	0.0126914	GO:0005515	GO:MF	protein binding	20512	1462	GO:0005488	IPI,ISO,IPI,IDA IPI ISS ISO,IPI,IPI,IPI,IPI IBA TAS,IDA IPI ISS IBA,ISO,IPI,IPI ISO,IPI ISS,TAS,IPI,IDA IPI,IDA IPI ISS ISO,IPI ISO IBA,IDA IPI ISO IBA,IPI ISO IBA,IPI ISO IBA,IPI ISS,ISO,IDA IPI IBA,IPI ISO IBA,IDA,IPI ISS ISO,IPI ISS ISO,IPI ISO IBA,IPI,IPI ISO,IPI ISO,IBA,IPI IBA,IPI ISS ISO,IPI ISO,IPI,IDA IPI IBA,IPI,IPI,IPI,IBA,IPI ISS,IPI,IPI ISS ISO IBA,IPI,ISS,ISS,IDA IBA,IDA IBA,IDA IPI…	Wdfy1,Farp1,Ntn1,Gclm,Ddt,Kpna4,Kpna6,Cdk5r2,Pomc,Got2,Cd44,Ap2a2,Tpi1,Lsp1,Pcgf2,Ndn,Fas,Kif5c,Ptpn6,Prkar2b,Ptpn11,Cd81,Por,Acvr1,Crkl,Nek1,Pkm,Tyro3,Opa1,Tuba4a,Adcyap1r1,Nos3,Cdh10,Smad5,Cacna1c,Prkcz,Anxa7,Dok7,Pip4p1,2510002D24Rik,Tmem109,Prrc1,Nr1d1,Klhdc2,Myo16,Lrrk2,Abcg1,Ripor1,Mtss2,Myh14,Ranbp10,Cyfip1,Fbxo11,Actn1,Gtf2a2,Pdk1,Bmp3,Dlgap2,Neto2,Tctn1,Casp9,Tsku,Dpyd,Ablim1,Aldh1l1,Uba…	0.013
44	query_1	TRUE	0.00483186	1351	181	29	0.160221	0.0214656	GO:0019899	GO:MF	enzyme binding	20512	3492	GO:0005515	ISO,IDA ISS ISO,IPI,IBA,ISO,IPI ISO,ISO,IPI IBA,IPI ISO IBA,ISO,IBA,ISO,IPI,ISO,ISO,IPI ISO,ISO,IDA IBA,ISO IBA,IPI,IDA,IPI,ISS,ISS,IDA,ISO,IPI,ISO,ISO	Farp1,Gclm,Ddt,Cdk5r2,Got2,Ap2a2,Fas,Prkar2b,Ptpn11,Por,Crkl,Opa1,Tuba4a,Adcyap1r1,Nos3,Cacna1c,Prkcz,Dok7,Myo16,Lrrk2,Mtss2,Ranbp10,Cyfip1,Casp9,Srgap2,Grpel1,Golga7b,Ccs,Ehmt2	0.021
45	query_1	TRUE	0.0235607	884	181	21	0.116022	0.0237557	GO:1901363	GO:MF	heterocyclic compound binding	20512	9876	GO:0036094	IGI ISS ISO IBA,ISS,ISO,ISO IBA,ISO IBA,ISO,IDA,IBA,IBA,ISO,IDA,IDA,ISO,IBA,ISO IBA,ISS,ISS,IBA,ISS,IDA,ISO	Farp1,Dhcr7,Got2,Prkar2b,Por,Pkm,Prkacb,Tuba4a,Nos3,Lrrk2,Myh14,Ranbp10,Pdk1,Gbp9,Dpyd,Cbr4,Sh3bp4,Grpel1,Dennd6b,Map3k20,Plod1	0.024
46	query_1	TRUE	0.0266464	690	181	18	0.0994475	0.026087	GO:0017076	GO:MF	purine nucleotide binding	20512	3071	GO:0000166	IGI ISS ISO IBA,ISS,ISO IBA,ISO,ISO,IDA,IBA,ISO,IDA,IDA,ISO,IBA,ISO IBA,ISS,ISS,IBA,ISS,IDA	Farp1,Dhcr7,Prkar2b,Por,Pkm,Prkacb,Tuba4a,Lrrk2,Myh14,Ranbp10,Pdk1,Gbp9,Dpyd,Cbr4,Sh3bp4,Grpel1,Dennd6b,Map3k20	0.026
47	query_1	TRUE	0.0372837	775	181	19	0.104972	0.0245161	GO:0000166	GO:MF	nucleotide binding	20512	31	GO:1901265, GO:1901363	IGI ISS ISO IBA,ISS,ISO IBA,ISO IBA,ISO,IDA,IBA,IBA,ISO,IDA,IDA,ISO,IBA,ISO IBA,ISS,ISS,IBA,ISS,IDA	Farp1,Dhcr7,Prkar2b,Por,Pkm,Prkacb,Tuba4a,Nos3,Lrrk2,Myh14,Ranbp10,Pdk1,Gbp9,Dpyd,Cbr4,Sh3bp4,Grpel1,Dennd6b,Map3k20	0.025
48	query_1	TRUE	0.04964	2	181	2	0.0110497	1	GO:0140523	GO:MF	GTPase-dependent fusogenic activity	20512	9414	GO:0003924, GO:0140522	IDA ISS,IMP ISO	Opa1,Anxa7	1
49	query_1	TRUE	0.04964	2	181	2	0.0110497	1	GO:0140522	GO:MF	fusogenic activity	20512	9413	GO:0003674	IDA ISS,IMP ISO	Opa1,Anxa7	1
50	query_1	TRUE	0.0496749	792	181	19	0.104972	0.0239899	GO:1901265	GO:MF	nucleoside phosphate binding	20512	9873	GO:0005488	IGI ISS ISO IBA,ISS,ISO IBA,ISO IBA,ISO,IDA,IBA,IBA,ISO,IDA,IDA,ISO,IBA,ISO IBA,ISS,ISS,IBA,ISS,IDA	Farp1,Dhcr7,Prkar2b,Por,Pkm,Prkacb,Tuba4a,Nos3,Lrrk2,Myh14,Ranbp10,Pdk1,Gbp9,Dpyd,Cbr4,Sh3bp4,Grpel1,Dennd6b,Map3k20	0.024
51	query_1	TRUE	0.00744575	1541	73	40	0.547945	0.0259572	HP:0001760	HP	Abnormal foot morphology	5228	1273	HP:0002814	HP,HP,HP,HP,HP,HP,HP,HP,HP,HP,HP,HP,HP,HP,HP,HP,HP,HP,HP,HP,HP,HP,HP,HP,HP,HP,HP,HP,HP,HP,HP,HP,HP,HP,HP,HP,HP,HP,HP,HP	Dhtkd1,Exoc6b,Pigg,Dhcr7,Enpp1,Pcgf2,Ndn,Kif5c,Por,Acvr1,Crkl,Nek1,Opa1,Prkacb,Hnrnph2,Erf,Sms,Cacna1c,Prkcz,Dlk1,Dok7,Arcn1,Rai1,Myh14,Fbxo11,Ano10,Atcay,Slc9a7,Rab3gap2,Tctn1,Gle1,Rttn,Gmppa,Atad3a,Mrps28,Wars2,Atp5f1d,Map3k20,Plod1,Srd5a3	0.026
52	query_1	TRUE	4.2e-12	10647	217	163	0.751152	0.0153095	TF:M10209_1	TF	Factor: E2F-1; motif: GNGGGCGGGRMN; match class: 1	21700	745	TF:M10209	TF,TF,TF,TF,TF,TF,TF,TF,TF,TF,TF,TF,TF,TF,TF,TF,TF,TF,TF,TF,TF,TF,TF,TF,TF,TF,TF,TF,TF,TF,TF,TF,TF,TF,TF,TF,TF,TF,TF,TF,TF,TF,TF,TF,TF,TF,TF,TF,TF,TF,TF,TF,TF,TF,TF,TF,TF,TF,TF,TF,TF,TF,TF,TF,TF,TF,TF,TF,TF,TF,TF,TF,TF,TF,TF,TF,TF,TF,TF,TF,TF,TF,TF,TF,TF,TF,TF,TF,TF,TF,TF,TF,TF,TF,TF,TF,TF,TF,TF,TF,TF,TF,TF,TF,TF,TF,TF,TF,TF,TF,TF,TF,TF,TF,TF,TF,TF,TF,TF,TF,TF,TF,TF,TF,TF,TF,TF,TF,TF,TF,TF,TF,TF,…	Dhtkd1,Tmem74b,Fbxl16,Exoc6b,Ccdc6,Rsbn1l,Pigg,Wdfy1,Cacna1i,Nfxl1,Farp1,Ro60,Ntn1,Gclm,Ddt,Kpna4,Pld3,Cdk5r2,Nmt2,Dhcr7,Enpp1,Ap2a2,Tpi1,Pcgf2,Fas,Kif5c,Prkar2b,Ptpn11,Cd81,Por,Acvr1,Impdh1,Nek1,Pkm,Golga3,Opa1,Gmeb2,Timm10,Prkacb,Tuba4a,Adcyap1r1,Erf,Sms,Smad5,Cacna1c,Prkcz,Dlk1,2300009A05Rik,Dok7,Pip4p1,Arglu1,Slc25a31,Samd5,Klhdc2,Myo16,Lrrk2,Arcn1,Crhbp,Rai1,Abcg1,Grm4,Ripor1,Arhgap23,Dusp23…	0.015
53	query_1	TRUE	4.38e-12	10434	217	161	0.741935	0.0154303	TF:M00803	TF	Factor: E2F; motif: GGCGSG	21700	790	TF:M00000	TF,TF,TF,TF,TF,TF,TF,TF,TF,TF,TF,TF,TF,TF,TF,TF,TF,TF,TF,TF,TF,TF,TF,TF,TF,TF,TF,TF,TF,TF,TF,TF,TF,TF,TF,TF,TF,TF,TF,TF,TF,TF,TF,TF,TF,TF,TF,TF,TF,TF,TF,TF,TF,TF,TF,TF,TF,TF,TF,TF,TF,TF,TF,TF,TF,TF,TF,TF,TF,TF,TF,TF,TF,TF,TF,TF,TF,TF,TF,TF,TF,TF,TF,TF,TF,TF,TF,TF,TF,TF,TF,TF,TF,TF,TF,TF,TF,TF,TF,TF,TF,TF,TF,TF,TF,TF,TF,TF,TF,TF,TF,TF,TF,TF,TF,TF,TF,TF,TF,TF,TF,TF,TF,TF,TF,TF,TF,TF,TF,TF,TF,TF,TF,…	Dhtkd1,Tmem74b,Fbxl16,Exoc6b,Ccdc6,Rsbn1l,Pcdh10,Wdfy1,Cacna1i,Nfxl1,Farp1,Ro60,Ntn1,Gclm,Ddt,Kpna4,Pld3,Cdk5r2,Nmt2,Dhcr7,Got2,Enpp1,Cd44,Ap2a2,Tpi1,Pcgf2,Kif5c,Ptpn6,Prkar2b,Ptpn11,Cd81,Acvr1,Crkl,Nek1,Pkm,Golga3,Acyp2,Gmeb2,Timm10,Prkacb,Tuba4a,Adcyap1r1,Hnrnph2,Erf,Sms,Smad5,Cacna1c,Prkcz,Anxa7,Dlk1,2300009A05Rik,Dok7,Pip4p1,2510002D24Rik,Tmem109,Spout1,Arglu1,Prrc1,Slc25a31,Samd5,Klhdc2,Myo1…	0.015
54	query_1	TRUE	8.22e-12	12793	217	181	0.834101	0.0141484	TF:M04662_1	TF	Factor: FOXN4; motif: NNWANNCGWMCGCGTCNNNNMT; match class: 1	21700	1181	TF:M04662	TF,TF,TF,TF,TF,TF,TF,TF,TF,TF,TF,TF,TF,TF,TF,TF,TF,TF,TF,TF,TF,TF,TF,TF,TF,TF,TF,TF,TF,TF,TF,TF,TF,TF,TF,TF,TF,TF,TF,TF,TF,TF,TF,TF,TF,TF,TF,TF,TF,TF,TF,TF,TF,TF,TF,TF,TF,TF,TF,TF,TF,TF,TF,TF,TF,TF,TF,TF,TF,TF,TF,TF,TF,TF,TF,TF,TF,TF,TF,TF,TF,TF,TF,TF,TF,TF,TF,TF,TF,TF,TF,TF,TF,TF,TF,TF,TF,TF,TF,TF,TF,TF,TF,TF,TF,TF,TF,TF,TF,TF,TF,TF,TF,TF,TF,TF,TF,TF,TF,TF,TF,TF,TF,TF,TF,TF,TF,TF,TF,TF,TF,TF,TF,…	Dhtkd1,Tmem74b,Fbxl16,Exoc6b,Ccdc6,Rsbn1l,Pigg,Pcdh10,Wdfy1,Cacna1i,Nfxl1,Farp1,Ro60,Ntn1,Gclm,Ddt,Kpna4,Kpna6,Cdk5r2,Nmt2,Dhcr7,Pomc,Got2,Enpp1,Cd44,Ap2a2,Pcgf2,Fas,Kif5c,Prkar2b,Ptpn11,Cd81,Por,Acvr1,Crkl,Impdh1,Nek1,Pkm,Golga3,Mrps21,Gmeb2,Timm10,Prkacb,Tuba4a,Adcyap1r1,Hnrnph2,Erf,Sms,Smad5,Cacna1c,Prkcz,Anxa7,Dlk1,2300009A05Rik,Dok7,Pip4p1,2510002D24Rik,Tmem109,Spout1,Arglu1,Prrc1,Nr1d1,Gpr1…	0.014
55	query_1	TRUE	4.57e-11	14247	217	191	0.880184	0.0134063	TF:M10209	TF	Factor: E2F-1; motif: GNGGGCGGGRMN	21700	744	TF:M00000	TF,TF,TF,TF,TF,TF,TF,TF,TF,TF,TF,TF,TF,TF,TF,TF,TF,TF,TF,TF,TF,TF,TF,TF,TF,TF,TF,TF,TF,TF,TF,TF,TF,TF,TF,TF,TF,TF,TF,TF,TF,TF,TF,TF,TF,TF,TF,TF,TF,TF,TF,TF,TF,TF,TF,TF,TF,TF,TF,TF,TF,TF,TF,TF,TF,TF,TF,TF,TF,TF,TF,TF,TF,TF,TF,TF,TF,TF,TF,TF,TF,TF,TF,TF,TF,TF,TF,TF,TF,TF,TF,TF,TF,TF,TF,TF,TF,TF,TF,TF,TF,TF,TF,TF,TF,TF,TF,TF,TF,TF,TF,TF,TF,TF,TF,TF,TF,TF,TF,TF,TF,TF,TF,TF,TF,TF,TF,TF,TF,TF,TF,TF,TF,…	Dhtkd1,Tmem74b,Fbxl16,Exoc6b,Ccdc6,Rsbn1l,Pigg,Pcdh10,Wdfy1,Cacna1i,Nfxl1,Farp1,Ro60,Ntn1,Gclm,Ddt,Kpna4,Kpna6,Pld3,Cdk5r2,Nmt2,Dhcr7,Gosr1,Enpp1,Cd44,Ap2a2,Tpi1,Lsp1,Pcgf2,Fas,Kif5c,Prkar2b,Ptpn11,Cd81,Por,Acvr1,Impdh1,Nek1,Pkm,Golga3,Acyp2,Mrps21,Opa1,Gmeb2,Timm10,Prkacb,Tuba4a,Adcyap1r1,Nos3,Hnrnph2,Erf,Sms,Smad5,Cacna1c,Prkcz,Anxa7,Dlk1,2300009A05Rik,Dok7,Pip4p1,Tmem109,Spout1,Arglu1,Prrc1,Sl…	0.013
56	query_1	TRUE	7.12e-11	14701	217	194	0.894009	0.0131964	TF:M01981	TF	Factor: ELK-1; motif: ACCGGAWRTN	21700	930	TF:M00000	TF,TF,TF,TF,TF,TF,TF,TF,TF,TF,TF,TF,TF,TF,TF,TF,TF,TF,TF,TF,TF,TF,TF,TF,TF,TF,TF,TF,TF,TF,TF,TF,TF,TF,TF,TF,TF,TF,TF,TF,TF,TF,TF,TF,TF,TF,TF,TF,TF,TF,TF,TF,TF,TF,TF,TF,TF,TF,TF,TF,TF,TF,TF,TF,TF,TF,TF,TF,TF,TF,TF,TF,TF,TF,TF,TF,TF,TF,TF,TF,TF,TF,TF,TF,TF,TF,TF,TF,TF,TF,TF,TF,TF,TF,TF,TF,TF,TF,TF,TF,TF,TF,TF,TF,TF,TF,TF,TF,TF,TF,TF,TF,TF,TF,TF,TF,TF,TF,TF,TF,TF,TF,TF,TF,TF,TF,TF,TF,TF,TF,TF,TF,TF,…	Tmem74b,Fbxl16,Ccdc6,Rsbn1l,Pigg,Pcdh10,Or51v14,Wdfy1,Cacna1i,Nfxl1,Farp1,Ro60,Ntn1,Gclm,Ddt,Kpna4,Kpna6,Pld3,Cdk5r2,Nmt2,Dhcr7,Gosr1,Pomc,Got2,Enpp1,Cd44,Klk1,Ap2a2,Tpi1,Lsp1,Pcgf2,Ndn,Fas,Klkb1,Kif5c,Prkar2b,Ptpn11,Cd81,Por,Acvr1,Crkl,Impdh1,Nek1,Pkm,Tyro3,Golga3,Acyp2,Mrps21,Opa1,Gmeb2,Timm10,Prkacb,Tuba4a,Adcyap1r1,Hnrnph2,Cdh10,Erf,Sms,Smad5,Cacna1c,Prkcz,Anxa7,Dlk1,2300009A05Rik,Dok7,Pip4p1…	0.013
57	query_1	TRUE	9.01e-11	14864	217	195	0.898618	0.0131189	TF:M00716	TF	Factor: ZF5; motif: GSGCGCGR	21700	3936	TF:M00000	TF,TF,TF,TF,TF,TF,TF,TF,TF,TF,TF,TF,TF,TF,TF,TF,TF,TF,TF,TF,TF,TF,TF,TF,TF,TF,TF,TF,TF,TF,TF,TF,TF,TF,TF,TF,TF,TF,TF,TF,TF,TF,TF,TF,TF,TF,TF,TF,TF,TF,TF,TF,TF,TF,TF,TF,TF,TF,TF,TF,TF,TF,TF,TF,TF,TF,TF,TF,TF,TF,TF,TF,TF,TF,TF,TF,TF,TF,TF,TF,TF,TF,TF,TF,TF,TF,TF,TF,TF,TF,TF,TF,TF,TF,TF,TF,TF,TF,TF,TF,TF,TF,TF,TF,TF,TF,TF,TF,TF,TF,TF,TF,TF,TF,TF,TF,TF,TF,TF,TF,TF,TF,TF,TF,TF,TF,TF,TF,TF,TF,TF,TF,TF,…	Dhtkd1,Tmem74b,Fbxl16,Exoc6b,Ccdc6,Rsbn1l,Pigg,Pcdh10,Wdfy1,Cacna1i,Nfxl1,Farp1,Ro60,Ntn1,Gclm,Ddt,Kpna4,Kpna6,Pld3,Cdk5r2,Nmt2,Dhcr7,Gosr1,Pomc,Got2,Enpp1,Cd44,Ap2a2,Tpi1,Lsp1,Pcgf2,Fas,Kif5c,Ptpn6,Prkar2b,Ptpn11,Cd81,Por,Acvr1,Crkl,Impdh1,Nek1,Pkm,Tyro3,Golga3,Acyp2,Mrps21,Opa1,Gmeb2,Timm10,Prkacb,Tuba4a,Adcyap1r1,Hnrnph2,Cdh10,Erf,Sms,Smad5,Cacna1c,Prkcz,Anxa7,Dlk1,2300009A05Rik,Dok7,Pip4p1,25…	0.013
58	query_1	TRUE	2.71e-09	12079	217	170	0.78341	0.014074	TF:M00716_1	TF	Factor: ZF5; motif: GSGCGCGR; match class: 1	21700	3937	TF:M00716	TF,TF,TF,TF,TF,TF,TF,TF,TF,TF,TF,TF,TF,TF,TF,TF,TF,TF,TF,TF,TF,TF,TF,TF,TF,TF,TF,TF,TF,TF,TF,TF,TF,TF,TF,TF,TF,TF,TF,TF,TF,TF,TF,TF,TF,TF,TF,TF,TF,TF,TF,TF,TF,TF,TF,TF,TF,TF,TF,TF,TF,TF,TF,TF,TF,TF,TF,TF,TF,TF,TF,TF,TF,TF,TF,TF,TF,TF,TF,TF,TF,TF,TF,TF,TF,TF,TF,TF,TF,TF,TF,TF,TF,TF,TF,TF,TF,TF,TF,TF,TF,TF,TF,TF,TF,TF,TF,TF,TF,TF,TF,TF,TF,TF,TF,TF,TF,TF,TF,TF,TF,TF,TF,TF,TF,TF,TF,TF,TF,TF,TF,TF,TF,…	Tmem74b,Fbxl16,Exoc6b,Ccdc6,Rsbn1l,Pigg,Pcdh10,Wdfy1,Cacna1i,Nfxl1,Farp1,Ro60,Ntn1,Gclm,Ddt,Kpna4,Kpna6,Pld3,Cdk5r2,Nmt2,Gosr1,Pomc,Got2,Enpp1,Cd44,Ap2a2,Lsp1,Pcgf2,Fas,Kif5c,Prkar2b,Ptpn11,Cd81,Por,Acvr1,Crkl,Impdh1,Nek1,Pkm,Golga3,Acyp2,Gmeb2,Timm10,Prkacb,Tuba4a,Adcyap1r1,Cdh10,Erf,Sms,Smad5,Cacna1c,Prkcz,Anxa7,Dlk1,2300009A05Rik,Dok7,Pip4p1,2510002D24Rik,Tmem109,Arglu1,Nr1d1,Slc25a31,Samd5,Kl…	0.014
59	query_1	TRUE	3.69e-09	10568	217	156	0.718894	0.0147615	TF:M07380	TF	Factor: E2F-4; motif: NTTTCSCGCC	21700	776	TF:M00000	TF,TF,TF,TF,TF,TF,TF,TF,TF,TF,TF,TF,TF,TF,TF,TF,TF,TF,TF,TF,TF,TF,TF,TF,TF,TF,TF,TF,TF,TF,TF,TF,TF,TF,TF,TF,TF,TF,TF,TF,TF,TF,TF,TF,TF,TF,TF,TF,TF,TF,TF,TF,TF,TF,TF,TF,TF,TF,TF,TF,TF,TF,TF,TF,TF,TF,TF,TF,TF,TF,TF,TF,TF,TF,TF,TF,TF,TF,TF,TF,TF,TF,TF,TF,TF,TF,TF,TF,TF,TF,TF,TF,TF,TF,TF,TF,TF,TF,TF,TF,TF,TF,TF,TF,TF,TF,TF,TF,TF,TF,TF,TF,TF,TF,TF,TF,TF,TF,TF,TF,TF,TF,TF,TF,TF,TF,TF,TF,TF,TF,TF,TF,TF,…	Dhtkd1,Tmem74b,Fbxl16,Ccdc6,Rsbn1l,Pigg,Cacna1i,Nfxl1,Farp1,Ro60,Gclm,Kpna4,Pld3,Cdk5r2,Nmt2,Dhcr7,Gosr1,Got2,Enpp1,Ap2a2,Tpi1,Pcgf2,Prkar2b,Cd81,Por,Acvr1,Crkl,Nek1,Pkm,Golga3,Mrps21,Opa1,Gmeb2,Timm10,Prkacb,Tuba4a,Adcyap1r1,Nos3,Erf,Sms,Cacna1c,Prkcz,Anxa7,Dlk1,2300009A05Rik,Dok7,Pip4p1,2510002D24Rik,Spout1,Arglu1,Nr1d1,Slc25a31,Samd5,Klhdc2,Myo16,Arcn1,Crhbp,Rai1,Abcg1,Grm4,Ripor1,Arhgap23,Isy…	0.015
60	query_1	TRUE	7.12e-09	7933	217	129	0.59447	0.0162612	TF:M10212	TF	Factor: E2F-7; motif: GRGGCGGGAANNN	21700	782	TF:M00000	TF,TF,TF,TF,TF,TF,TF,TF,TF,TF,TF,TF,TF,TF,TF,TF,TF,TF,TF,TF,TF,TF,TF,TF,TF,TF,TF,TF,TF,TF,TF,TF,TF,TF,TF,TF,TF,TF,TF,TF,TF,TF,TF,TF,TF,TF,TF,TF,TF,TF,TF,TF,TF,TF,TF,TF,TF,TF,TF,TF,TF,TF,TF,TF,TF,TF,TF,TF,TF,TF,TF,TF,TF,TF,TF,TF,TF,TF,TF,TF,TF,TF,TF,TF,TF,TF,TF,TF,TF,TF,TF,TF,TF,TF,TF,TF,TF,TF,TF,TF,TF,TF,TF,TF,TF,TF,TF,TF,TF,TF,TF,TF,TF,TF,TF,TF,TF,TF,TF,TF,TF,TF,TF,TF,TF,TF,TF,TF,TF	Dhtkd1,Tmem74b,Ccdc6,Rsbn1l,Pigg,Cacna1i,Nfxl1,Farp1,Ro60,Ntn1,Ddt,Kpna4,Pld3,Nmt2,Dhcr7,Gosr1,Ap2a2,Tpi1,Pcgf2,Prkar2b,Cd81,Por,Acvr1,Nek1,Pkm,Golga3,Acyp2,Mrps21,Opa1,Gmeb2,Timm10,Prkacb,Tuba4a,Adcyap1r1,Sms,Cacna1c,Prkcz,Anxa7,Dlk1,2300009A05Rik,Dok7,Pip4p1,Spout1,Arglu1,Slc25a31,Samd5,Klhdc2,Myo16,Arcn1,Crhbp,Rai1,Ripor1,Arhgap23,Isy1,Cyp4x1,Mtss2,Myh14,Ranbp10,Fbxo11,Actn1,Pdk1,Fam210a,Ano10…	0.016
61	query_1	TRUE	2.19e-08	16001	217	199	0.917051	0.0124367	TF:M04662	TF	Factor: FOXN4; motif: NNWANNCGWMCGCGTCNNNNMT	21700	1180	TF:M00000	TF,TF,TF,TF,TF,TF,TF,TF,TF,TF,TF,TF,TF,TF,TF,TF,TF,TF,TF,TF,TF,TF,TF,TF,TF,TF,TF,TF,TF,TF,TF,TF,TF,TF,TF,TF,TF,TF,TF,TF,TF,TF,TF,TF,TF,TF,TF,TF,TF,TF,TF,TF,TF,TF,TF,TF,TF,TF,TF,TF,TF,TF,TF,TF,TF,TF,TF,TF,TF,TF,TF,TF,TF,TF,TF,TF,TF,TF,TF,TF,TF,TF,TF,TF,TF,TF,TF,TF,TF,TF,TF,TF,TF,TF,TF,TF,TF,TF,TF,TF,TF,TF,TF,TF,TF,TF,TF,TF,TF,TF,TF,TF,TF,TF,TF,TF,TF,TF,TF,TF,TF,TF,TF,TF,TF,TF,TF,TF,TF,TF,TF,TF,TF,…	Dhtkd1,Tmem74b,Fbxl16,Exoc6b,Ccdc6,Rsbn1l,Pigg,Pcdh10,Wdfy1,Cacna1i,Nfxl1,Farp1,Ro60,Ntn1,Gclm,Ddt,Kpna4,Kpna6,Pld3,Cdk5r2,Nmt2,Dhcr7,Pomc,Got2,Enpp1,Cd44,Ap2a2,Lsp1,Pcgf2,Fas,Klkb1,Kif5c,Ptpn6,Prkar2b,Ptpn11,Cd81,Por,Acvr1,Crkl,Impdh1,Nek1,Pkm,Golga3,Acyp2,Mrps21,Opa1,Gmeb2,Timm10,Prkacb,Tuba4a,Adcyap1r1,Nos3,Hnrnph2,Erf,Sms,Smad5,Cacna1c,Prkcz,Anxa7,Dlk1,2300009A05Rik,Dok7,Pip4p1,2510002D24Rik,…	0.012
62	query_1	TRUE	2.35e-08	5379	217	99	0.456221	0.0184049	TF:M07380_1	TF	Factor: E2F-4; motif: NTTTCSCGCC; match class: 1	21700	777	TF:M07380	TF,TF,TF,TF,TF,TF,TF,TF,TF,TF,TF,TF,TF,TF,TF,TF,TF,TF,TF,TF,TF,TF,TF,TF,TF,TF,TF,TF,TF,TF,TF,TF,TF,TF,TF,TF,TF,TF,TF,TF,TF,TF,TF,TF,TF,TF,TF,TF,TF,TF,TF,TF,TF,TF,TF,TF,TF,TF,TF,TF,TF,TF,TF,TF,TF,TF,TF,TF,TF,TF,TF,TF,TF,TF,TF,TF,TF,TF,TF,TF,TF,TF,TF,TF,TF,TF,TF,TF,TF,TF,TF,TF,TF,TF,TF,TF,TF,TF,TF	Dhtkd1,Tmem74b,Fbxl16,Ccdc6,Rsbn1l,Cacna1i,Farp1,Gclm,Kpna4,Pld3,Nmt2,Enpp1,Ap2a2,Pcgf2,Prkar2b,Cd81,Por,Acvr1,Nek1,Golga3,Mrps21,Opa1,Gmeb2,Timm10,Prkacb,Tuba4a,Sms,Cacna1c,Anxa7,Dlk1,2300009A05Rik,Dok7,Pip4p1,Arglu1,Slc25a31,Samd5,Klhdc2,Myo16,Rai1,Grm4,Arhgap23,Mtss2,Myh14,Fbxo11,Actn1,Pdk1,Fam210a,Ptbp3,Slc9a7,Mon1b,Neto2,Pgghg,Tctn1,Sik2,Dpyd,Gatad2a,Cmc2,Ubac2,Zc3h10,Tcf25,Slco3a1,2310022A1…	0.018
63	query_1	TRUE	1.11e-07	13671	217	180	0.829493	0.0131666	TF:M02844	TF	Factor: BCL6B; motif: NNNNCCGCCCCWNNNN	21700	270	TF:M00000	TF,TF,TF,TF,TF,TF,TF,TF,TF,TF,TF,TF,TF,TF,TF,TF,TF,TF,TF,TF,TF,TF,TF,TF,TF,TF,TF,TF,TF,TF,TF,TF,TF,TF,TF,TF,TF,TF,TF,TF,TF,TF,TF,TF,TF,TF,TF,TF,TF,TF,TF,TF,TF,TF,TF,TF,TF,TF,TF,TF,TF,TF,TF,TF,TF,TF,TF,TF,TF,TF,TF,TF,TF,TF,TF,TF,TF,TF,TF,TF,TF,TF,TF,TF,TF,TF,TF,TF,TF,TF,TF,TF,TF,TF,TF,TF,TF,TF,TF,TF,TF,TF,TF,TF,TF,TF,TF,TF,TF,TF,TF,TF,TF,TF,TF,TF,TF,TF,TF,TF,TF,TF,TF,TF,TF,TF,TF,TF,TF,TF,TF,TF,TF,…	Dhtkd1,Tmem74b,Fbxl16,Exoc6b,Ccdc6,Rsbn1l,Pigg,Pcdh10,Wdfy1,Cacna1i,Nfxl1,Farp1,Ro60,Ntn1,Gclm,Ddt,Kpna4,Kpna6,Pld3,Cdk5r2,Nmt2,Dhcr7,Gosr1,Pomc,Mb,Enpp1,Klk1,Klk1b22,Ap2a2,Tpi1,Lsp1,Pcgf2,Fas,Kif5c,Ptpn6,Ptpn11,Cd81,Por,Acvr1,Impdh1,Nek1,Pkm,Tyro3,Golga3,Acyp2,Gmeb2,Timm10,Prkacb,Tuba4a,Nos3,Hnrnph2,Erf,Sms,Smad5,Cacna1c,Prkcz,Anxa7,Dlk1,Dok7,Pip4p1,2510002D24Rik,Tmem109,Arglu1,Prrc1,Nr1d1,Gpr14…	0.013
64	query_1	TRUE	1.44e-07	14448	217	186	0.857143	0.0128738	TF:M00333	TF	Factor: ZF5; motif: NRNGNGCGCGCWN	21700	3938	TF:M00000	TF,TF,TF,TF,TF,TF,TF,TF,TF,TF,TF,TF,TF,TF,TF,TF,TF,TF,TF,TF,TF,TF,TF,TF,TF,TF,TF,TF,TF,TF,TF,TF,TF,TF,TF,TF,TF,TF,TF,TF,TF,TF,TF,TF,TF,TF,TF,TF,TF,TF,TF,TF,TF,TF,TF,TF,TF,TF,TF,TF,TF,TF,TF,TF,TF,TF,TF,TF,TF,TF,TF,TF,TF,TF,TF,TF,TF,TF,TF,TF,TF,TF,TF,TF,TF,TF,TF,TF,TF,TF,TF,TF,TF,TF,TF,TF,TF,TF,TF,TF,TF,TF,TF,TF,TF,TF,TF,TF,TF,TF,TF,TF,TF,TF,TF,TF,TF,TF,TF,TF,TF,TF,TF,TF,TF,TF,TF,TF,TF,TF,TF,TF,TF,…	Dhtkd1,Tmem74b,Fbxl16,Exoc6b,Ccdc6,Rsbn1l,Pcdh10,Wdfy1,Cacna1i,Nfxl1,Farp1,Ro60,Ntn1,Gclm,Ddt,Kpna4,Kpna6,Pld3,Cdk5r2,Nmt2,Dhcr7,Gosr1,Got2,Enpp1,Cd44,Ap2a2,Tpi1,Pcgf2,Fas,Klkb1,Kif5c,Ptpn6,Prkar2b,Ptpn11,Cd81,Por,Acvr1,Crkl,Impdh1,Nek1,Pkm,Tyro3,Golga3,Acyp2,Opa1,Gmeb2,Timm10,Prkacb,Tuba4a,Adcyap1r1,Cdh10,Erf,Sms,Smad5,Cacna1c,Prkcz,Anxa7,Dlk1,2300009A05Rik,Dok7,Pip4p1,2510002D24Rik,Tmem109,Spou…	0.013
65	query_1	TRUE	2.27e-07	12007	217	165	0.760369	0.013742	TF:M01240_1	TF	Factor: BEN; motif: CAGCGRNV; match class: 1	21700	287	TF:M01240	TF,TF,TF,TF,TF,TF,TF,TF,TF,TF,TF,TF,TF,TF,TF,TF,TF,TF,TF,TF,TF,TF,TF,TF,TF,TF,TF,TF,TF,TF,TF,TF,TF,TF,TF,TF,TF,TF,TF,TF,TF,TF,TF,TF,TF,TF,TF,TF,TF,TF,TF,TF,TF,TF,TF,TF,TF,TF,TF,TF,TF,TF,TF,TF,TF,TF,TF,TF,TF,TF,TF,TF,TF,TF,TF,TF,TF,TF,TF,TF,TF,TF,TF,TF,TF,TF,TF,TF,TF,TF,TF,TF,TF,TF,TF,TF,TF,TF,TF,TF,TF,TF,TF,TF,TF,TF,TF,TF,TF,TF,TF,TF,TF,TF,TF,TF,TF,TF,TF,TF,TF,TF,TF,TF,TF,TF,TF,TF,TF,TF,TF,TF,TF,…	Dhtkd1,Tmem74b,Fbxl16,Exoc6b,Ccdc6,Rsbn1l,Pigg,Pcdh10,Wdfy1,Cacna1i,Nfxl1,Farp1,Ntn1,Gclm,Kpna4,Kpna6,Pld3,Cdk5r2,Nmt2,Dhcr7,Pomc,Got2,Enpp1,Ap2a2,Pcgf2,Fas,Kif5c,Ptpn6,Prkar2b,Ptpn11,Cd81,Por,Acvr1,Crkl,Impdh1,Nek1,Pkm,Acyp2,Opa1,Timm10,Prkacb,Tuba4a,Adcyap1r1,Nos3,Cdh10,Erf,Sms,Smad5,Cacna1c,Prkcz,Anxa7,Dlk1,2300009A05Rik,Dok7,Pip4p1,Tmem109,Spout1,Arglu1,Prrc1,Nr1d1,Samd5,Klhdc2,Lrrk2,Arcn1,Cr…	0.014
66	query_1	TRUE	3.64e-07	11293	217	158	0.728111	0.013991	TF:M02089	TF	Factor: E2F-3; motif: GGCGGGN	21700	768	TF:M00000	TF,TF,TF,TF,TF,TF,TF,TF,TF,TF,TF,TF,TF,TF,TF,TF,TF,TF,TF,TF,TF,TF,TF,TF,TF,TF,TF,TF,TF,TF,TF,TF,TF,TF,TF,TF,TF,TF,TF,TF,TF,TF,TF,TF,TF,TF,TF,TF,TF,TF,TF,TF,TF,TF,TF,TF,TF,TF,TF,TF,TF,TF,TF,TF,TF,TF,TF,TF,TF,TF,TF,TF,TF,TF,TF,TF,TF,TF,TF,TF,TF,TF,TF,TF,TF,TF,TF,TF,TF,TF,TF,TF,TF,TF,TF,TF,TF,TF,TF,TF,TF,TF,TF,TF,TF,TF,TF,TF,TF,TF,TF,TF,TF,TF,TF,TF,TF,TF,TF,TF,TF,TF,TF,TF,TF,TF,TF,TF,TF,TF,TF,TF,TF,…	Tmem74b,Fbxl16,Exoc6b,Ccdc6,Rsbn1l,Pigg,Pcdh10,Wdfy1,Cacna1i,Farp1,Ro60,Gclm,Ddt,Kpna4,Pld3,Cdk5r2,Nmt2,Dhcr7,Enpp1,Ap2a2,Tpi1,Lsp1,Pcgf2,Fas,Kif5c,Prkar2b,Ptpn11,Cd81,Por,Acvr1,Impdh1,Nek1,Pkm,Golga3,Acyp2,Gmeb2,Prkacb,Tuba4a,Adcyap1r1,Nos3,Erf,Sms,Smad5,Cacna1c,Prkcz,Dlk1,2300009A05Rik,Dok7,Pip4p1,Tmem109,Arglu1,Slc25a31,Samd5,Klhdc2,Myo16,Lrrk2,Arcn1,Crhbp,Rai1,Abcg1,Grm4,Ripor1,Arhgap23,Dusp2…	0.014
67	query_1	TRUE	3.98e-07	14313	217	184	0.847926	0.0128554	TF:M08995	TF	Factor: CTCF; motif: NAGGGGGCGCNNKNNNN	21700	622	TF:M00000	TF,TF,TF,TF,TF,TF,TF,TF,TF,TF,TF,TF,TF,TF,TF,TF,TF,TF,TF,TF,TF,TF,TF,TF,TF,TF,TF,TF,TF,TF,TF,TF,TF,TF,TF,TF,TF,TF,TF,TF,TF,TF,TF,TF,TF,TF,TF,TF,TF,TF,TF,TF,TF,TF,TF,TF,TF,TF,TF,TF,TF,TF,TF,TF,TF,TF,TF,TF,TF,TF,TF,TF,TF,TF,TF,TF,TF,TF,TF,TF,TF,TF,TF,TF,TF,TF,TF,TF,TF,TF,TF,TF,TF,TF,TF,TF,TF,TF,TF,TF,TF,TF,TF,TF,TF,TF,TF,TF,TF,TF,TF,TF,TF,TF,TF,TF,TF,TF,TF,TF,TF,TF,TF,TF,TF,TF,TF,TF,TF,TF,TF,TF,TF,…	Dhtkd1,Tmem74b,Fbxl16,Exoc6b,Ccdc6,Rsbn1l,Pigg,Pcdh10,Wdfy1,Cacna1i,Nfxl1,Farp1,Ro60,Ntn1,Gclm,Ddt,Kpna4,Kpna6,Pld3,Cdk5r2,Nmt2,Dhcr7,Pomc,Mb,Got2,Enpp1,Cd44,Klk1,Ap2a2,Lsp1,Pcgf2,Fas,Klkb1,Kif5c,Prkar2b,Ptpn11,Cd81,Por,Acvr1,Crkl,Impdh1,Nek1,Pkm,Tyro3,Golga3,Timm10,Prkacb,Tuba4a,Adcyap1r1,Nos3,Hnrnph2,Cdh10,Erf,Sms,Smad5,Cacna1c,Prkcz,Anxa7,Dlk1,2300009A05Rik,Dok7,Pip4p1,2510002D24Rik,Tmem109,Sp…	0.013
68	query_1	TRUE	4.82e-07	11218	217	157	0.723502	0.0139954	TF:M00333_1	TF	Factor: ZF5; motif: NRNGNGCGCGCWN; match class: 1	21700	3939	TF:M00333	TF,TF,TF,TF,TF,TF,TF,TF,TF,TF,TF,TF,TF,TF,TF,TF,TF,TF,TF,TF,TF,TF,TF,TF,TF,TF,TF,TF,TF,TF,TF,TF,TF,TF,TF,TF,TF,TF,TF,TF,TF,TF,TF,TF,TF,TF,TF,TF,TF,TF,TF,TF,TF,TF,TF,TF,TF,TF,TF,TF,TF,TF,TF,TF,TF,TF,TF,TF,TF,TF,TF,TF,TF,TF,TF,TF,TF,TF,TF,TF,TF,TF,TF,TF,TF,TF,TF,TF,TF,TF,TF,TF,TF,TF,TF,TF,TF,TF,TF,TF,TF,TF,TF,TF,TF,TF,TF,TF,TF,TF,TF,TF,TF,TF,TF,TF,TF,TF,TF,TF,TF,TF,TF,TF,TF,TF,TF,TF,TF,TF,TF,TF,TF,…	Tmem74b,Fbxl16,Exoc6b,Ccdc6,Rsbn1l,Pcdh10,Wdfy1,Cacna1i,Nfxl1,Farp1,Ro60,Ntn1,Gclm,Ddt,Kpna6,Cdk5r2,Nmt2,Dhcr7,Got2,Enpp1,Ap2a2,Tpi1,Pcgf2,Kif5c,Prkar2b,Ptpn11,Cd81,Por,Acvr1,Crkl,Nek1,Tyro3,Acyp2,Gmeb2,Timm10,Prkacb,Tuba4a,Adcyap1r1,Erf,Sms,Smad5,Cacna1c,Prkcz,Anxa7,Dlk1,2300009A05Rik,Dok7,Pip4p1,2510002D24Rik,Spout1,Arglu1,Prrc1,Slc25a31,Samd5,Klhdc2,Arcn1,Crhbp,Rai1,Abcg1,Grm4,Ripor1,Isy1,Dusp…	0.014
69	query_1	TRUE	2.12e-06	8349	217	127	0.585253	0.0152114	TF:M00008	TF	Factor: Sp1; motif: GGGGCGGGGT	21700	3318	TF:M00000	TF,TF,TF,TF,TF,TF,TF,TF,TF,TF,TF,TF,TF,TF,TF,TF,TF,TF,TF,TF,TF,TF,TF,TF,TF,TF,TF,TF,TF,TF,TF,TF,TF,TF,TF,TF,TF,TF,TF,TF,TF,TF,TF,TF,TF,TF,TF,TF,TF,TF,TF,TF,TF,TF,TF,TF,TF,TF,TF,TF,TF,TF,TF,TF,TF,TF,TF,TF,TF,TF,TF,TF,TF,TF,TF,TF,TF,TF,TF,TF,TF,TF,TF,TF,TF,TF,TF,TF,TF,TF,TF,TF,TF,TF,TF,TF,TF,TF,TF,TF,TF,TF,TF,TF,TF,TF,TF,TF,TF,TF,TF,TF,TF,TF,TF,TF,TF,TF,TF,TF,TF,TF,TF,TF,TF,TF,TF	Tmem74b,Fbxl16,Exoc6b,Ccdc6,Rsbn1l,Pcdh10,Wdfy1,Farp1,Ro60,Ntn1,Gclm,Ddt,Kpna4,Kpna6,Pld3,Nmt2,Dhcr7,Enpp1,Ap2a2,Tpi1,Pcgf2,Kif5c,Prkar2b,Cd81,Por,Acvr1,Nek1,Pkm,Golga3,Acyp2,Gmeb2,Timm10,Prkacb,Tuba4a,Adcyap1r1,Nos3,Sms,2300009A05Rik,Dok7,Pip4p1,Tmem109,Arglu1,Slc25a31,Klhdc2,Lrrk2,Arcn1,Crhbp,Rai1,Abcg1,Ripor1,Arhgap23,Isy1,Cyp4x1,Dusp23,Mtss2,Ranbp10,Fbxo11,Actn1,Gtf2a2,Pdk1,Ano10,Ptbp3,Atcay,…	0.015
70	query_1	TRUE	2.27e-06	16229	217	197	0.907834	0.0121388	TF:M01240	TF	Factor: BEN; motif: CAGCGRNV	21700	286	TF:M00000	TF,TF,TF,TF,TF,TF,TF,TF,TF,TF,TF,TF,TF,TF,TF,TF,TF,TF,TF,TF,TF,TF,TF,TF,TF,TF,TF,TF,TF,TF,TF,TF,TF,TF,TF,TF,TF,TF,TF,TF,TF,TF,TF,TF,TF,TF,TF,TF,TF,TF,TF,TF,TF,TF,TF,TF,TF,TF,TF,TF,TF,TF,TF,TF,TF,TF,TF,TF,TF,TF,TF,TF,TF,TF,TF,TF,TF,TF,TF,TF,TF,TF,TF,TF,TF,TF,TF,TF,TF,TF,TF,TF,TF,TF,TF,TF,TF,TF,TF,TF,TF,TF,TF,TF,TF,TF,TF,TF,TF,TF,TF,TF,TF,TF,TF,TF,TF,TF,TF,TF,TF,TF,TF,TF,TF,TF,TF,TF,TF,TF,TF,TF,TF,…	Dhtkd1,Tmem74b,Fbxl16,Exoc6b,Ccdc6,Rsbn1l,Pigg,Pcdh10,Wdfy1,Cacna1i,Nfxl1,Farp1,Ro60,Ntn1,Gclm,Ddt,Kpna4,Kpna6,Pld3,Cdk5r2,Nmt2,Dhcr7,Gosr1,Pomc,Mb,Got2,Enpp1,Ap2a2,Tpi1,Pcgf2,Fas,Kif5c,Ptpn6,Prkar2b,Ptpn11,Cd81,Por,Acvr1,Crkl,Impdh1,Nek1,Pkm,Golga3,Acyp2,Mrps21,Opa1,Gmeb2,Timm10,Prkacb,Tuba4a,Adcyap1r1,Nos3,Cdh10,Erf,Sms,Smad5,Cacna1c,Prkcz,Anxa7,Dlk1,2300009A05Rik,Dok7,Pip4p1,2510002D24Rik,Tmem…	0.012
71	query_1	TRUE	4.26e-06	8048	217	123	0.56682	0.0152833	TF:M00189	TF	Factor: AP-2; motif: MKCCCSCNGGCG	21700	118	TF:M00000	TF,TF,TF,TF,TF,TF,TF,TF,TF,TF,TF,TF,TF,TF,TF,TF,TF,TF,TF,TF,TF,TF,TF,TF,TF,TF,TF,TF,TF,TF,TF,TF,TF,TF,TF,TF,TF,TF,TF,TF,TF,TF,TF,TF,TF,TF,TF,TF,TF,TF,TF,TF,TF,TF,TF,TF,TF,TF,TF,TF,TF,TF,TF,TF,TF,TF,TF,TF,TF,TF,TF,TF,TF,TF,TF,TF,TF,TF,TF,TF,TF,TF,TF,TF,TF,TF,TF,TF,TF,TF,TF,TF,TF,TF,TF,TF,TF,TF,TF,TF,TF,TF,TF,TF,TF,TF,TF,TF,TF,TF,TF,TF,TF,TF,TF,TF,TF,TF,TF,TF,TF,TF,TF	Dhtkd1,Tmem74b,Exoc6b,Ccdc6,Rsbn1l,Wdfy1,Cacna1i,Nfxl1,Farp1,Ro60,Ntn1,Gclm,Pld3,Cdk5r2,Nmt2,Got2,Enpp1,Cd44,Ap2a2,Tpi1,Lsp1,Fas,Klkb1,Kif5c,Prkar2b,Ptpn11,Cd81,Acvr1,Tyro3,Golga3,Gmeb2,Prkacb,Tuba4a,Adcyap1r1,Erf,Sms,Smad5,Cacna1c,Prkcz,Dlk1,Dok7,Pip4p1,Arglu1,Prrc1,Slc25a31,Samd5,Klhdc2,Rai1,Grm4,Ripor1,Arhgap23,Cyp4x1,Mtss2,Ranbp10,Cyfip1,Fbxo11,Actn1,Ptbp3,Bmp3,Serinc5,Mon1b,Neto2,Armc6,Casp9…	0.015
72	query_1	TRUE	4.83e-06	8541	217	128	0.589862	0.0149865	TF:M02844_1	TF	Factor: BCL6B; motif: NNNNCCGCCCCWNNNN; match class: 1	21700	271	TF:M02844	TF,TF,TF,TF,TF,TF,TF,TF,TF,TF,TF,TF,TF,TF,TF,TF,TF,TF,TF,TF,TF,TF,TF,TF,TF,TF,TF,TF,TF,TF,TF,TF,TF,TF,TF,TF,TF,TF,TF,TF,TF,TF,TF,TF,TF,TF,TF,TF,TF,TF,TF,TF,TF,TF,TF,TF,TF,TF,TF,TF,TF,TF,TF,TF,TF,TF,TF,TF,TF,TF,TF,TF,TF,TF,TF,TF,TF,TF,TF,TF,TF,TF,TF,TF,TF,TF,TF,TF,TF,TF,TF,TF,TF,TF,TF,TF,TF,TF,TF,TF,TF,TF,TF,TF,TF,TF,TF,TF,TF,TF,TF,TF,TF,TF,TF,TF,TF,TF,TF,TF,TF,TF,TF,TF,TF,TF,TF,TF	Tmem74b,Fbxl16,Exoc6b,Ccdc6,Pcdh10,Cacna1i,Farp1,Ro60,Ntn1,Kpna4,Pld3,Dhcr7,Mb,Enpp1,Klk1,Klk1b22,Ap2a2,Tpi1,Lsp1,Pcgf2,Fas,Kif5c,Ptpn6,Ptpn11,Cd81,Por,Acvr1,Impdh1,Nek1,Pkm,Golga3,Acyp2,Gmeb2,Tuba4a,Hnrnph2,Erf,Smad5,Cacna1c,Anxa7,Dlk1,Dok7,Pip4p1,2510002D24Rik,Tmem109,Arglu1,Prrc1,Slc25a31,Samd5,Klhdc2,Myo16,Lrrk2,Crhbp,Rai1,Abcg1,Grm4,Ripor1,Arhgap23,Dusp23,Mtss2,Myh14,Cyfip1,Fbxo11,Actn1,Pdk1…	0.015
73	query_1	TRUE	9.02e-06	10005	217	142	0.654378	0.0141929	TF:M10276_1	TF	Factor: Kaiso; motif: SARNYCTCGCGAGAN; match class: 1	21700	3903	TF:M10276	TF,TF,TF,TF,TF,TF,TF,TF,TF,TF,TF,TF,TF,TF,TF,TF,TF,TF,TF,TF,TF,TF,TF,TF,TF,TF,TF,TF,TF,TF,TF,TF,TF,TF,TF,TF,TF,TF,TF,TF,TF,TF,TF,TF,TF,TF,TF,TF,TF,TF,TF,TF,TF,TF,TF,TF,TF,TF,TF,TF,TF,TF,TF,TF,TF,TF,TF,TF,TF,TF,TF,TF,TF,TF,TF,TF,TF,TF,TF,TF,TF,TF,TF,TF,TF,TF,TF,TF,TF,TF,TF,TF,TF,TF,TF,TF,TF,TF,TF,TF,TF,TF,TF,TF,TF,TF,TF,TF,TF,TF,TF,TF,TF,TF,TF,TF,TF,TF,TF,TF,TF,TF,TF,TF,TF,TF,TF,TF,TF,TF,TF,TF,TF,…	Tmem74b,Fbxl16,Exoc6b,Ccdc6,Rsbn1l,Pigg,Pcdh10,Wdfy1,Cacna1i,Nfxl1,Farp1,Ntn1,Gclm,Ddt,Kpna4,Kpna6,Pld3,Cdk5r2,Nmt2,Pomc,Enpp1,Ap2a2,Pcgf2,Kif5c,Prkar2b,Ptpn11,Cd81,Por,Acvr1,Crkl,Impdh1,Pkm,Golga3,Acyp2,Mrps21,Opa1,Gmeb2,Timm10,Prkacb,Tuba4a,Hnrnph2,Erf,Sms,Smad5,Cacna1c,Prkcz,Anxa7,Dlk1,Dok7,Pip4p1,2510002D24Rik,Tmem109,Arglu1,Prrc1,Samd5,Klhdc2,Myo16,Arcn1,Rai1,Grm4,Ripor1,Arhgap23,Isy1,Mtss2,…	0.014
74	query_1	TRUE	1.03e-05	10744	217	149	0.686636	0.0138682	TF:M10375	TF	Factor: Sp1; motif: GGNGGGGGNGGGGGMGGGGCNGGG	21700	3322	TF:M00000	TF,TF,TF,TF,TF,TF,TF,TF,TF,TF,TF,TF,TF,TF,TF,TF,TF,TF,TF,TF,TF,TF,TF,TF,TF,TF,TF,TF,TF,TF,TF,TF,TF,TF,TF,TF,TF,TF,TF,TF,TF,TF,TF,TF,TF,TF,TF,TF,TF,TF,TF,TF,TF,TF,TF,TF,TF,TF,TF,TF,TF,TF,TF,TF,TF,TF,TF,TF,TF,TF,TF,TF,TF,TF,TF,TF,TF,TF,TF,TF,TF,TF,TF,TF,TF,TF,TF,TF,TF,TF,TF,TF,TF,TF,TF,TF,TF,TF,TF,TF,TF,TF,TF,TF,TF,TF,TF,TF,TF,TF,TF,TF,TF,TF,TF,TF,TF,TF,TF,TF,TF,TF,TF,TF,TF,TF,TF,TF,TF,TF,TF,TF,TF,…	Dhtkd1,Tmem74b,Fbxl16,Exoc6b,Ccdc6,Rsbn1l,Wdfy1,Cacna1i,Farp1,Ro60,Ntn1,Gclm,Ddt,Kpna4,Pld3,Cdk5r2,Nmt2,Mb,Enpp1,Cd44,Klk1b22,Ap2a2,Lsp1,Pcgf2,Fas,Ptpn6,Prkar2b,Ptpn11,Cd81,Acvr1,Crkl,Impdh1,Nek1,Pkm,Golga3,Acyp2,Gmeb2,Timm10,Prkacb,Tuba4a,Adcyap1r1,Nos3,Hnrnph2,Erf,Sms,Smad5,Cacna1c,Prkcz,Dlk1,2300009A05Rik,Dok7,Pip4p1,2510002D24Rik,Tmem109,Prrc1,Samd5,Klhdc2,Myo16,Lrrk2,Arcn1,Crhbp,Rai1,Abcg1,G…	0.014
75	query_1	TRUE	1.55e-05	7916	217	120	0.552995	0.0151592	TF:M00428	TF	Factor: E2F-1; motif: NKTSSCGC	21700	746	TF:M00000	TF,TF,TF,TF,TF,TF,TF,TF,TF,TF,TF,TF,TF,TF,TF,TF,TF,TF,TF,TF,TF,TF,TF,TF,TF,TF,TF,TF,TF,TF,TF,TF,TF,TF,TF,TF,TF,TF,TF,TF,TF,TF,TF,TF,TF,TF,TF,TF,TF,TF,TF,TF,TF,TF,TF,TF,TF,TF,TF,TF,TF,TF,TF,TF,TF,TF,TF,TF,TF,TF,TF,TF,TF,TF,TF,TF,TF,TF,TF,TF,TF,TF,TF,TF,TF,TF,TF,TF,TF,TF,TF,TF,TF,TF,TF,TF,TF,TF,TF,TF,TF,TF,TF,TF,TF,TF,TF,TF,TF,TF,TF,TF,TF,TF,TF,TF,TF,TF,TF,TF	Dhtkd1,Tmem74b,Fbxl16,Exoc6b,Ccdc6,Pcdh10,Cacna1i,Nfxl1,Farp1,Ntn1,Gclm,Ddt,Kpna6,Pld3,Nmt2,Dhcr7,Got2,Enpp1,Cd44,Ap2a2,Pcgf2,Kif5c,Prkar2b,Ptpn11,Cd81,Por,Acvr1,Crkl,Nek1,Pkm,Golga3,Acyp2,Gmeb2,Prkacb,Hnrnph2,Cdh10,Sms,Smad5,Cacna1c,Prkcz,Anxa7,2300009A05Rik,Pip4p1,Tmem109,Arglu1,Prrc1,Slc25a31,Samd5,Klhdc2,Myo16,Arcn1,Rai1,Abcg1,Grm4,Cyp4x1,Mtss2,Cyfip1,Actn1,Pdk1,Ano10,Ptbp3,Bmp3,Serinc5,Slc9a…	0.015
76	query_1	TRUE	1.62e-05	6904	217	109	0.502304	0.0157879	TF:M02089_1	TF	Factor: E2F-3; motif: GGCGGGN; match class: 1	21700	769	TF:M02089	TF,TF,TF,TF,TF,TF,TF,TF,TF,TF,TF,TF,TF,TF,TF,TF,TF,TF,TF,TF,TF,TF,TF,TF,TF,TF,TF,TF,TF,TF,TF,TF,TF,TF,TF,TF,TF,TF,TF,TF,TF,TF,TF,TF,TF,TF,TF,TF,TF,TF,TF,TF,TF,TF,TF,TF,TF,TF,TF,TF,TF,TF,TF,TF,TF,TF,TF,TF,TF,TF,TF,TF,TF,TF,TF,TF,TF,TF,TF,TF,TF,TF,TF,TF,TF,TF,TF,TF,TF,TF,TF,TF,TF,TF,TF,TF,TF,TF,TF,TF,TF,TF,TF,TF,TF,TF,TF,TF,TF	Tmem74b,Fbxl16,Exoc6b,Ccdc6,Rsbn1l,Pigg,Cacna1i,Farp1,Ro60,Ddt,Kpna4,Cdk5r2,Nmt2,Dhcr7,Enpp1,Ap2a2,Pcgf2,Fas,Kif5c,Prkar2b,Ptpn11,Cd81,Por,Acvr1,Impdh1,Nek1,Pkm,Golga3,Tuba4a,Adcyap1r1,Erf,Sms,Smad5,Cacna1c,Prkcz,Dlk1,2300009A05Rik,Dok7,Pip4p1,Arglu1,Slc25a31,Samd5,Myo16,Lrrk2,Arcn1,Rai1,Abcg1,Grm4,Ripor1,Arhgap23,Dusp23,Mtss2,Ranbp10,Cyfip1,Fbxo11,Actn1,Pdk1,Ano10,Ptbp3,Atcay,Serinc5,Slc9a7,Rab3…	0.016
77	query_1	TRUE	2.57e-05	13504	217	173	0.797235	0.012811	TF:M10276	TF	Factor: Kaiso; motif: SARNYCTCGCGAGAN	21700	3902	TF:M00000	TF,TF,TF,TF,TF,TF,TF,TF,TF,TF,TF,TF,TF,TF,TF,TF,TF,TF,TF,TF,TF,TF,TF,TF,TF,TF,TF,TF,TF,TF,TF,TF,TF,TF,TF,TF,TF,TF,TF,TF,TF,TF,TF,TF,TF,TF,TF,TF,TF,TF,TF,TF,TF,TF,TF,TF,TF,TF,TF,TF,TF,TF,TF,TF,TF,TF,TF,TF,TF,TF,TF,TF,TF,TF,TF,TF,TF,TF,TF,TF,TF,TF,TF,TF,TF,TF,TF,TF,TF,TF,TF,TF,TF,TF,TF,TF,TF,TF,TF,TF,TF,TF,TF,TF,TF,TF,TF,TF,TF,TF,TF,TF,TF,TF,TF,TF,TF,TF,TF,TF,TF,TF,TF,TF,TF,TF,TF,TF,TF,TF,TF,TF,TF,…	Tmem74b,Fbxl16,Exoc6b,Ccdc6,Rsbn1l,Pigg,Pcdh10,Wdfy1,Cacna1i,Nfxl1,Farp1,Ro60,Ntn1,Gclm,Ddt,Kpna4,Kpna6,Pld3,Cdk5r2,Nmt2,Pomc,Enpp1,Cd44,Ap2a2,Tpi1,Pcgf2,Ndn,Fas,Kif5c,Prkar2b,Ptpn11,Cd81,Por,Acvr1,Crkl,Impdh1,Nek1,Pkm,Golga3,Acyp2,Mrps21,Opa1,Gmeb2,Timm10,Prkacb,Tuba4a,Adcyap1r1,Hnrnph2,Erf,Sms,Smad5,Cacna1c,Prkcz,Anxa7,Dlk1,2300009A05Rik,Dok7,Pip4p1,2510002D24Rik,Tmem109,Spout1,Arglu1,Prrc1,Slc…	0.013
78	query_1	TRUE	2.61e-05	9039	217	131	0.603687	0.0144928	TF:M07250	TF	Factor: E2F-1; motif: NNNSSCGCSAANN	21700	752	TF:M00000	TF,TF,TF,TF,TF,TF,TF,TF,TF,TF,TF,TF,TF,TF,TF,TF,TF,TF,TF,TF,TF,TF,TF,TF,TF,TF,TF,TF,TF,TF,TF,TF,TF,TF,TF,TF,TF,TF,TF,TF,TF,TF,TF,TF,TF,TF,TF,TF,TF,TF,TF,TF,TF,TF,TF,TF,TF,TF,TF,TF,TF,TF,TF,TF,TF,TF,TF,TF,TF,TF,TF,TF,TF,TF,TF,TF,TF,TF,TF,TF,TF,TF,TF,TF,TF,TF,TF,TF,TF,TF,TF,TF,TF,TF,TF,TF,TF,TF,TF,TF,TF,TF,TF,TF,TF,TF,TF,TF,TF,TF,TF,TF,TF,TF,TF,TF,TF,TF,TF,TF,TF,TF,TF,TF,TF,TF,TF,TF,TF,TF,TF	Tmem74b,Fbxl16,Exoc6b,Ccdc6,Rsbn1l,Pcdh10,Cacna1i,Nfxl1,Farp1,Ro60,Ntn1,Gclm,Ddt,Kpna4,Kpna6,Pld3,Cdk5r2,Nmt2,Enpp1,Cd44,Ap2a2,Tpi1,Pcgf2,Kif5c,Prkar2b,Ptpn11,Cd81,Acvr1,Crkl,Pkm,Mrps21,Gmeb2,Timm10,Prkacb,Adcyap1r1,Hnrnph2,Cdh10,Erf,Sms,Cacna1c,Prkcz,Anxa7,Dlk1,2300009A05Rik,Spout1,Arglu1,Prrc1,Slc25a31,Samd5,Klhdc2,Myo16,Arcn1,Rai1,Grm4,Ripor1,Cyp4x1,Mtss2,Cyfip1,Fbxo11,Actn1,Pdk1,Ptbp3,Bmp3,Se…	0.014
79	query_1	TRUE	2.62e-05	15200	217	187	0.861751	0.0123026	TF:M07991	TF	Factor: Hes1; motif: NNCACGYGNN	21700	1468	TF:M00000	TF,TF,TF,TF,TF,TF,TF,TF,TF,TF,TF,TF,TF,TF,TF,TF,TF,TF,TF,TF,TF,TF,TF,TF,TF,TF,TF,TF,TF,TF,TF,TF,TF,TF,TF,TF,TF,TF,TF,TF,TF,TF,TF,TF,TF,TF,TF,TF,TF,TF,TF,TF,TF,TF,TF,TF,TF,TF,TF,TF,TF,TF,TF,TF,TF,TF,TF,TF,TF,TF,TF,TF,TF,TF,TF,TF,TF,TF,TF,TF,TF,TF,TF,TF,TF,TF,TF,TF,TF,TF,TF,TF,TF,TF,TF,TF,TF,TF,TF,TF,TF,TF,TF,TF,TF,TF,TF,TF,TF,TF,TF,TF,TF,TF,TF,TF,TF,TF,TF,TF,TF,TF,TF,TF,TF,TF,TF,TF,TF,TF,TF,TF,TF,…	Dhtkd1,Tmem74b,Fbxl16,Exoc6b,Ccdc6,Rsbn1l,Pigg,Pcdh10,Or51v14,Wdfy1,Cacna1i,Nfxl1,Farp1,Ro60,Gclm,Ddt,Kpna4,Kpna6,Pld3,Nmt2,Dhcr7,Gosr1,Got2,Enpp1,Cd44,Ap2a2,Tpi1,Lsp1,Pcgf2,Fas,Klkb1,Kif5c,Ptpn6,Prkar2b,Ptpn11,Cd81,Por,Acvr1,Crkl,Impdh1,Nek1,Pkm,Tyro3,Golga3,Mrps21,Opa1,Gmeb2,Timm10,Prkacb,Tuba4a,Adcyap1r1,Nos3,Hnrnph2,Erf,Sms,Smad5,Cacna1c,Prkcz,Anxa7,Dlk1,2300009A05Rik,Dok7,Pip4p1,2510002D24Ri…	0.012
80	query_1	TRUE	2.69e-05	9141	217	132	0.608295	0.0144404	TF:M07395	TF	Factor: Sp1; motif: NGGGGCGGGGN	21700	3326	TF:M00000	TF,TF,TF,TF,TF,TF,TF,TF,TF,TF,TF,TF,TF,TF,TF,TF,TF,TF,TF,TF,TF,TF,TF,TF,TF,TF,TF,TF,TF,TF,TF,TF,TF,TF,TF,TF,TF,TF,TF,TF,TF,TF,TF,TF,TF,TF,TF,TF,TF,TF,TF,TF,TF,TF,TF,TF,TF,TF,TF,TF,TF,TF,TF,TF,TF,TF,TF,TF,TF,TF,TF,TF,TF,TF,TF,TF,TF,TF,TF,TF,TF,TF,TF,TF,TF,TF,TF,TF,TF,TF,TF,TF,TF,TF,TF,TF,TF,TF,TF,TF,TF,TF,TF,TF,TF,TF,TF,TF,TF,TF,TF,TF,TF,TF,TF,TF,TF,TF,TF,TF,TF,TF,TF,TF,TF,TF,TF,TF,TF,TF,TF,TF	Tmem74b,Fbxl16,Exoc6b,Ccdc6,Rsbn1l,Pigg,Pcdh10,Cacna1i,Farp1,Ro60,Gclm,Ddt,Cdk5r2,Nmt2,Dhcr7,Enpp1,Ap2a2,Tpi1,Lsp1,Pcgf2,Fas,Kif5c,Prkar2b,Ptpn11,Cd81,Por,Acvr1,Impdh1,Nek1,Pkm,Golga3,Acyp2,Prkacb,Tuba4a,Adcyap1r1,Nos3,Hnrnph2,Erf,Sms,Smad5,Cacna1c,Prkcz,Dlk1,2300009A05Rik,Dok7,Pip4p1,Arglu1,Slc25a31,Myo16,Lrrk2,Arcn1,Crhbp,Rai1,Abcg1,Ripor1,Arhgap23,Dusp23,Mtss2,Ranbp10,Cyfip1,Fbxo11,Actn1,Pdk1,…	0.014
81	query_1	TRUE	6.3e-05	4543	217	80	0.368664	0.0176095	TF:M07395_1	TF	Factor: Sp1; motif: NGGGGCGGGGN; match class: 1	21700	3327	TF:M07395	TF,TF,TF,TF,TF,TF,TF,TF,TF,TF,TF,TF,TF,TF,TF,TF,TF,TF,TF,TF,TF,TF,TF,TF,TF,TF,TF,TF,TF,TF,TF,TF,TF,TF,TF,TF,TF,TF,TF,TF,TF,TF,TF,TF,TF,TF,TF,TF,TF,TF,TF,TF,TF,TF,TF,TF,TF,TF,TF,TF,TF,TF,TF,TF,TF,TF,TF,TF,TF,TF,TF,TF,TF,TF,TF,TF,TF,TF,TF,TF	Tmem74b,Fbxl16,Exoc6b,Ccdc6,Farp1,Ro60,Nmt2,Dhcr7,Enpp1,Ap2a2,Pcgf2,Fas,Ptpn11,Cd81,Por,Acvr1,Impdh1,Nek1,Pkm,Golga3,Tuba4a,Erf,2300009A05Rik,Dok7,Pip4p1,Arglu1,Slc25a31,Myo16,Arcn1,Rai1,Abcg1,Ripor1,Arhgap23,Dusp23,Ranbp10,Fbxo11,Actn1,Ano10,Ptbp3,Atcay,Serinc5,Slc9a7,Mon1b,Neto2,Ttc12,Tctn1,Casp9,Sik2,Dpyd,Gatad2a,Cmc2,Angel2,Ablim1,Znfx1,Slco3a1,Ubac1,Dtnbp1,Sh3bp4,Ppp1r16a,Neurl1a,Smc6,Eps8l2…	0.018
82	query_1	TRUE	6.9e-05	8675	217	126	0.580645	0.0145245	TF:M00931	TF	Factor: Sp1; motif: GGGGCGGGGC	21700	3332	TF:M00000	TF,TF,TF,TF,TF,TF,TF,TF,TF,TF,TF,TF,TF,TF,TF,TF,TF,TF,TF,TF,TF,TF,TF,TF,TF,TF,TF,TF,TF,TF,TF,TF,TF,TF,TF,TF,TF,TF,TF,TF,TF,TF,TF,TF,TF,TF,TF,TF,TF,TF,TF,TF,TF,TF,TF,TF,TF,TF,TF,TF,TF,TF,TF,TF,TF,TF,TF,TF,TF,TF,TF,TF,TF,TF,TF,TF,TF,TF,TF,TF,TF,TF,TF,TF,TF,TF,TF,TF,TF,TF,TF,TF,TF,TF,TF,TF,TF,TF,TF,TF,TF,TF,TF,TF,TF,TF,TF,TF,TF,TF,TF,TF,TF,TF,TF,TF,TF,TF,TF,TF,TF,TF,TF,TF,TF,TF	Tmem74b,Fbxl16,Exoc6b,Ccdc6,Rsbn1l,Pigg,Pcdh10,Wdfy1,Cacna1i,Farp1,Ro60,Gclm,Ddt,Kpna4,Cdk5r2,Nmt2,Dhcr7,Enpp1,Ap2a2,Tpi1,Lsp1,Pcgf2,Fas,Kif5c,Prkar2b,Ptpn11,Cd81,Por,Acvr1,Impdh1,Nek1,Pkm,Golga3,Acyp2,Prkacb,Tuba4a,Adcyap1r1,Nos3,Erf,Sms,Cacna1c,Prkcz,Dlk1,2300009A05Rik,Dok7,Pip4p1,Arglu1,Slc25a31,Myo16,Lrrk2,Arcn1,Crhbp,Rai1,Abcg1,Ripor1,Arhgap23,Dusp23,Mtss2,Ranbp10,Cyfip1,Fbxo11,Actn1,Pdk1,An…	0.015
83	query_1	TRUE	6.93e-05	7258	217	111	0.511521	0.0152935	TF:M05391	TF	Factor: LKLF; motif: NGGGCGG	21700	1962	TF:M00000	TF,TF,TF,TF,TF,TF,TF,TF,TF,TF,TF,TF,TF,TF,TF,TF,TF,TF,TF,TF,TF,TF,TF,TF,TF,TF,TF,TF,TF,TF,TF,TF,TF,TF,TF,TF,TF,TF,TF,TF,TF,TF,TF,TF,TF,TF,TF,TF,TF,TF,TF,TF,TF,TF,TF,TF,TF,TF,TF,TF,TF,TF,TF,TF,TF,TF,TF,TF,TF,TF,TF,TF,TF,TF,TF,TF,TF,TF,TF,TF,TF,TF,TF,TF,TF,TF,TF,TF,TF,TF,TF,TF,TF,TF,TF,TF,TF,TF,TF,TF,TF,TF,TF,TF,TF,TF,TF,TF,TF,TF,TF	Tmem74b,Fbxl16,Exoc6b,Ccdc6,Farp1,Kpna4,Pld3,Cdk5r2,Nmt2,Enpp1,Tpi1,Klkb1,Kif5c,Ptpn6,Prkar2b,Ptpn11,Cd81,Acvr1,Crkl,Impdh1,Nek1,Pkm,Tyro3,Opa1,Gmeb2,Timm10,Prkacb,Tuba4a,Sms,Smad5,Prkcz,2300009A05Rik,Dok7,Pip4p1,Tmem109,Spout1,Arglu1,Prrc1,Klhdc2,Myo16,Arcn1,Rai1,Abcg1,Grm4,Dusp23,Myh14,Ranbp10,Cyfip1,Pdk1,Ptbp3,Bmp3,Serinc5,Slc9a7,Mon1b,Neto2,Pgghg,Ttc12,Tctn1,Casp9,Gatad2a,Angel2,Znfx1,Ubac2,S…	0.015
84	query_1	TRUE	6.93e-05	7258	217	111	0.511521	0.0152935	TF:M05301	TF	Factor: CPBP; motif: NGGGCGG	21700	550	TF:M00000	TF,TF,TF,TF,TF,TF,TF,TF,TF,TF,TF,TF,TF,TF,TF,TF,TF,TF,TF,TF,TF,TF,TF,TF,TF,TF,TF,TF,TF,TF,TF,TF,TF,TF,TF,TF,TF,TF,TF,TF,TF,TF,TF,TF,TF,TF,TF,TF,TF,TF,TF,TF,TF,TF,TF,TF,TF,TF,TF,TF,TF,TF,TF,TF,TF,TF,TF,TF,TF,TF,TF,TF,TF,TF,TF,TF,TF,TF,TF,TF,TF,TF,TF,TF,TF,TF,TF,TF,TF,TF,TF,TF,TF,TF,TF,TF,TF,TF,TF,TF,TF,TF,TF,TF,TF,TF,TF,TF,TF,TF,TF	Tmem74b,Fbxl16,Exoc6b,Ccdc6,Farp1,Kpna4,Pld3,Cdk5r2,Nmt2,Enpp1,Tpi1,Klkb1,Kif5c,Ptpn6,Prkar2b,Ptpn11,Cd81,Acvr1,Crkl,Impdh1,Nek1,Pkm,Tyro3,Opa1,Gmeb2,Timm10,Prkacb,Tuba4a,Sms,Smad5,Prkcz,2300009A05Rik,Dok7,Pip4p1,Tmem109,Spout1,Arglu1,Prrc1,Klhdc2,Myo16,Arcn1,Rai1,Abcg1,Grm4,Dusp23,Myh14,Ranbp10,Cyfip1,Pdk1,Ptbp3,Bmp3,Serinc5,Slc9a7,Mon1b,Neto2,Pgghg,Ttc12,Tctn1,Casp9,Gatad2a,Angel2,Znfx1,Ubac2,S…	0.015
85	query_1	TRUE	6.93e-05	7258	217	111	0.511521	0.0152935	TF:M05665	TF	Factor: Sp3; motif: AGGGCGG	21700	3340	TF:M00000	TF,TF,TF,TF,TF,TF,TF,TF,TF,TF,TF,TF,TF,TF,TF,TF,TF,TF,TF,TF,TF,TF,TF,TF,TF,TF,TF,TF,TF,TF,TF,TF,TF,TF,TF,TF,TF,TF,TF,TF,TF,TF,TF,TF,TF,TF,TF,TF,TF,TF,TF,TF,TF,TF,TF,TF,TF,TF,TF,TF,TF,TF,TF,TF,TF,TF,TF,TF,TF,TF,TF,TF,TF,TF,TF,TF,TF,TF,TF,TF,TF,TF,TF,TF,TF,TF,TF,TF,TF,TF,TF,TF,TF,TF,TF,TF,TF,TF,TF,TF,TF,TF,TF,TF,TF,TF,TF,TF,TF,TF,TF	Tmem74b,Fbxl16,Exoc6b,Ccdc6,Farp1,Kpna4,Pld3,Cdk5r2,Nmt2,Enpp1,Tpi1,Klkb1,Kif5c,Ptpn6,Prkar2b,Ptpn11,Cd81,Acvr1,Crkl,Impdh1,Nek1,Pkm,Tyro3,Opa1,Gmeb2,Timm10,Prkacb,Tuba4a,Sms,Smad5,Prkcz,2300009A05Rik,Dok7,Pip4p1,Tmem109,Spout1,Arglu1,Prrc1,Klhdc2,Myo16,Arcn1,Rai1,Abcg1,Grm4,Dusp23,Myh14,Ranbp10,Cyfip1,Pdk1,Ptbp3,Bmp3,Serinc5,Slc9a7,Mon1b,Neto2,Pgghg,Ttc12,Tctn1,Casp9,Gatad2a,Angel2,Znfx1,Ubac2,S…	0.015
86	query_1	TRUE	6.93e-05	7258	217	111	0.511521	0.0152935	TF:M05455	TF	Factor: SP6; motif: WGGGCGG	21700	3360	TF:M00000	TF,TF,TF,TF,TF,TF,TF,TF,TF,TF,TF,TF,TF,TF,TF,TF,TF,TF,TF,TF,TF,TF,TF,TF,TF,TF,TF,TF,TF,TF,TF,TF,TF,TF,TF,TF,TF,TF,TF,TF,TF,TF,TF,TF,TF,TF,TF,TF,TF,TF,TF,TF,TF,TF,TF,TF,TF,TF,TF,TF,TF,TF,TF,TF,TF,TF,TF,TF,TF,TF,TF,TF,TF,TF,TF,TF,TF,TF,TF,TF,TF,TF,TF,TF,TF,TF,TF,TF,TF,TF,TF,TF,TF,TF,TF,TF,TF,TF,TF,TF,TF,TF,TF,TF,TF,TF,TF,TF,TF,TF,TF	Tmem74b,Fbxl16,Exoc6b,Ccdc6,Farp1,Kpna4,Pld3,Cdk5r2,Nmt2,Enpp1,Tpi1,Klkb1,Kif5c,Ptpn6,Prkar2b,Ptpn11,Cd81,Acvr1,Crkl,Impdh1,Nek1,Pkm,Tyro3,Opa1,Gmeb2,Timm10,Prkacb,Tuba4a,Sms,Smad5,Prkcz,2300009A05Rik,Dok7,Pip4p1,Tmem109,Spout1,Arglu1,Prrc1,Klhdc2,Myo16,Arcn1,Rai1,Abcg1,Grm4,Dusp23,Myh14,Ranbp10,Cyfip1,Pdk1,Ptbp3,Bmp3,Serinc5,Slc9a7,Mon1b,Neto2,Pgghg,Ttc12,Tctn1,Casp9,Gatad2a,Angel2,Znfx1,Ubac2,S…	0.015
87	query_1	TRUE	0.000111675	9030	217	129	0.59447	0.0142857	TF:M01981_1	TF	Factor: ELK-1; motif: ACCGGAWRTN; match class: 1	21700	931	TF:M01981	TF,TF,TF,TF,TF,TF,TF,TF,TF,TF,TF,TF,TF,TF,TF,TF,TF,TF,TF,TF,TF,TF,TF,TF,TF,TF,TF,TF,TF,TF,TF,TF,TF,TF,TF,TF,TF,TF,TF,TF,TF,TF,TF,TF,TF,TF,TF,TF,TF,TF,TF,TF,TF,TF,TF,TF,TF,TF,TF,TF,TF,TF,TF,TF,TF,TF,TF,TF,TF,TF,TF,TF,TF,TF,TF,TF,TF,TF,TF,TF,TF,TF,TF,TF,TF,TF,TF,TF,TF,TF,TF,TF,TF,TF,TF,TF,TF,TF,TF,TF,TF,TF,TF,TF,TF,TF,TF,TF,TF,TF,TF,TF,TF,TF,TF,TF,TF,TF,TF,TF,TF,TF,TF,TF,TF,TF,TF,TF,TF	Tmem74b,Fbxl16,Ccdc6,Rsbn1l,Pcdh10,Wdfy1,Farp1,Ro60,Ntn1,Kpna4,Kpna6,Pld3,Cdk5r2,Nmt2,Dhcr7,Gosr1,Pomc,Got2,Enpp1,Cd44,Ap2a2,Tpi1,Pcgf2,Kif5c,Prkar2b,Ptpn11,Por,Acvr1,Crkl,Nek1,Tyro3,Golga3,Mrps21,Timm10,Prkacb,Tuba4a,Cdh10,Erf,Sms,Smad5,Prkcz,Pip4p1,Tmem109,Spout1,Slc25a31,Klhdc2,Myo16,Arcn1,Crhbp,Rai1,Grm4,Isy1,Dusp23,Cyfip1,Fbxo11,Gtf2a2,Pdk1,Fam210a,Ano10,Ptbp3,Atcay,Serinc5,Mon1b,Pgghg,Tsku,…	0.014
88	query_1	TRUE	0.000115315	9829	217	137	0.631336	0.0139383	TF:M00025	TF	Factor: Elk-1; motif: NNNNCCGGAARTNN	21700	924	TF:M00000	TF,TF,TF,TF,TF,TF,TF,TF,TF,TF,TF,TF,TF,TF,TF,TF,TF,TF,TF,TF,TF,TF,TF,TF,TF,TF,TF,TF,TF,TF,TF,TF,TF,TF,TF,TF,TF,TF,TF,TF,TF,TF,TF,TF,TF,TF,TF,TF,TF,TF,TF,TF,TF,TF,TF,TF,TF,TF,TF,TF,TF,TF,TF,TF,TF,TF,TF,TF,TF,TF,TF,TF,TF,TF,TF,TF,TF,TF,TF,TF,TF,TF,TF,TF,TF,TF,TF,TF,TF,TF,TF,TF,TF,TF,TF,TF,TF,TF,TF,TF,TF,TF,TF,TF,TF,TF,TF,TF,TF,TF,TF,TF,TF,TF,TF,TF,TF,TF,TF,TF,TF,TF,TF,TF,TF,TF,TF,TF,TF,TF,TF,TF,TF,…	Tmem74b,Fbxl16,Ccdc6,Rsbn1l,Pigg,Wdfy1,Nfxl1,Farp1,Ro60,Pld3,Cdk5r2,Nmt2,Dhcr7,Gosr1,Enpp1,Cd44,Ap2a2,Lsp1,Ndn,Fas,Kif5c,Prkar2b,Ptpn11,Acvr1,Crkl,Impdh1,Nek1,Tyro3,Golga3,Acyp2,Mrps21,Opa1,Gmeb2,Timm10,Prkacb,Tuba4a,Adcyap1r1,Cdh10,Erf,Sms,Prkcz,Dlk1,2300009A05Rik,Tmem109,Spout1,Arglu1,Slc25a31,Samd5,Klhdc2,Myo16,Arcn1,Crhbp,Rai1,Grm4,Isy1,Dusp23,Cyfip1,Fbxo11,Actn1,Gtf2a2,Pdk1,Fam210a,Ano10,Ptb…	0.014
89	query_1	TRUE	0.000130978	10354	217	142	0.654378	0.0137145	TF:M02090	TF	Factor: E2F-4; motif: GCGGGAAANA	21700	778	TF:M00000	TF,TF,TF,TF,TF,TF,TF,TF,TF,TF,TF,TF,TF,TF,TF,TF,TF,TF,TF,TF,TF,TF,TF,TF,TF,TF,TF,TF,TF,TF,TF,TF,TF,TF,TF,TF,TF,TF,TF,TF,TF,TF,TF,TF,TF,TF,TF,TF,TF,TF,TF,TF,TF,TF,TF,TF,TF,TF,TF,TF,TF,TF,TF,TF,TF,TF,TF,TF,TF,TF,TF,TF,TF,TF,TF,TF,TF,TF,TF,TF,TF,TF,TF,TF,TF,TF,TF,TF,TF,TF,TF,TF,TF,TF,TF,TF,TF,TF,TF,TF,TF,TF,TF,TF,TF,TF,TF,TF,TF,TF,TF,TF,TF,TF,TF,TF,TF,TF,TF,TF,TF,TF,TF,TF,TF,TF,TF,TF,TF,TF,TF,TF,TF,…	Tmem74b,Fbxl16,Exoc6b,Ccdc6,Pigg,Pcdh10,Cacna1i,Nfxl1,Farp1,Ro60,Ntn1,Gclm,Ddt,Kpna4,Pld3,Cdk5r2,Nmt2,Dhcr7,Gosr1,Pomc,Got2,Enpp1,Cd44,Ap2a2,Tpi1,Pcgf2,Kif5c,Ptpn11,Cd81,Acvr1,Crkl,Impdh1,Pkm,Golga3,Acyp2,Opa1,Prkacb,Tuba4a,Adcyap1r1,Hnrnph2,Erf,Sms,Cacna1c,Prkcz,Anxa7,Dlk1,2300009A05Rik,Dok7,Spout1,Arglu1,Prrc1,Nr1d1,Slc25a31,Samd5,Klhdc2,Lrrk2,Arcn1,Rai1,Grm4,Ripor1,Arhgap23,Dusp23,Ranbp10,Fbxo…	0.014
90	query_1	TRUE	0.000140319	9356	217	132	0.608295	0.0141086	TF:M08995_1	TF	Factor: CTCF; motif: NAGGGGGCGCNNKNNNN; match class: 1	21700	623	TF:M08995	TF,TF,TF,TF,TF,TF,TF,TF,TF,TF,TF,TF,TF,TF,TF,TF,TF,TF,TF,TF,TF,TF,TF,TF,TF,TF,TF,TF,TF,TF,TF,TF,TF,TF,TF,TF,TF,TF,TF,TF,TF,TF,TF,TF,TF,TF,TF,TF,TF,TF,TF,TF,TF,TF,TF,TF,TF,TF,TF,TF,TF,TF,TF,TF,TF,TF,TF,TF,TF,TF,TF,TF,TF,TF,TF,TF,TF,TF,TF,TF,TF,TF,TF,TF,TF,TF,TF,TF,TF,TF,TF,TF,TF,TF,TF,TF,TF,TF,TF,TF,TF,TF,TF,TF,TF,TF,TF,TF,TF,TF,TF,TF,TF,TF,TF,TF,TF,TF,TF,TF,TF,TF,TF,TF,TF,TF,TF,TF,TF,TF,TF,TF	Dhtkd1,Tmem74b,Fbxl16,Ccdc6,Rsbn1l,Wdfy1,Cacna1i,Nfxl1,Farp1,Ntn1,Ddt,Kpna4,Cdk5r2,Nmt2,Dhcr7,Pomc,Mb,Got2,Enpp1,Klk1,Ap2a2,Lsp1,Pcgf2,Fas,Prkar2b,Ptpn11,Cd81,Por,Acvr1,Crkl,Impdh1,Nek1,Pkm,Tyro3,Prkacb,Tuba4a,Adcyap1r1,Cdh10,Erf,Sms,Smad5,Cacna1c,Prkcz,Anxa7,Dlk1,2300009A05Rik,Dok7,Pip4p1,Arglu1,Nr1d1,Slc25a31,Klhdc2,Lrrk2,Crhbp,Rai1,Abcg1,Grm4,Ripor1,Arhgap23,Dusp23,Mtss2,Myh14,Ranbp10,Fbxo11,A…	0.014
91	query_1	TRUE	0.000187333	7013	217	107	0.493088	0.0152574	TF:M00470	TF	Factor: AP-2gamma; motif: GCCYNNGGS	21700	102	TF:M00000	TF,TF,TF,TF,TF,TF,TF,TF,TF,TF,TF,TF,TF,TF,TF,TF,TF,TF,TF,TF,TF,TF,TF,TF,TF,TF,TF,TF,TF,TF,TF,TF,TF,TF,TF,TF,TF,TF,TF,TF,TF,TF,TF,TF,TF,TF,TF,TF,TF,TF,TF,TF,TF,TF,TF,TF,TF,TF,TF,TF,TF,TF,TF,TF,TF,TF,TF,TF,TF,TF,TF,TF,TF,TF,TF,TF,TF,TF,TF,TF,TF,TF,TF,TF,TF,TF,TF,TF,TF,TF,TF,TF,TF,TF,TF,TF,TF,TF,TF,TF,TF,TF,TF,TF,TF,TF,TF	Dhtkd1,Tmem74b,Pigg,Pcdh10,Wdfy1,Cacna1i,Nfxl1,Farp1,Ro60,Ntn1,Gclm,Kpna6,Cdk5r2,Nmt2,Got2,Enpp1,Cd44,Ap2a2,Tpi1,Lsp1,Pcgf2,Ptpn6,Prkar2b,Ptpn11,Cd81,Por,Acvr1,Crkl,Impdh1,Tyro3,Golga3,Acyp2,Prkacb,Tuba4a,Adcyap1r1,Nos3,Erf,Smad5,Cacna1c,Prkcz,Dlk1,2300009A05Rik,Pip4p1,2510002D24Rik,Tmem109,Arglu1,Samd5,Klhdc2,Myo16,Abcg1,Grm4,Ripor1,Arhgap23,Isy1,Cyp4x1,Mtss2,Myh14,Fbxo11,Actn1,Ptbp3,Mon1b,Neto2…	0.015
92	query_1	TRUE	0.000195435	9500	217	133	0.612903	0.014	TF:M02835	TF	Factor: Zic1; motif: NNCCCCCGGGGGGG	21700	4238	TF:M00000	TF,TF,TF,TF,TF,TF,TF,TF,TF,TF,TF,TF,TF,TF,TF,TF,TF,TF,TF,TF,TF,TF,TF,TF,TF,TF,TF,TF,TF,TF,TF,TF,TF,TF,TF,TF,TF,TF,TF,TF,TF,TF,TF,TF,TF,TF,TF,TF,TF,TF,TF,TF,TF,TF,TF,TF,TF,TF,TF,TF,TF,TF,TF,TF,TF,TF,TF,TF,TF,TF,TF,TF,TF,TF,TF,TF,TF,TF,TF,TF,TF,TF,TF,TF,TF,TF,TF,TF,TF,TF,TF,TF,TF,TF,TF,TF,TF,TF,TF,TF,TF,TF,TF,TF,TF,TF,TF,TF,TF,TF,TF,TF,TF,TF,TF,TF,TF,TF,TF,TF,TF,TF,TF,TF,TF,TF,TF,TF,TF,TF,TF,TF,TF	Tmem74b,Fbxl16,Exoc6b,Ccdc6,Pigg,Wdfy1,Cacna1i,Nfxl1,Farp1,Ro60,Ntn1,Gclm,Kpna4,Kpna6,Pld3,Cdk5r2,Dhcr7,Pomc,Mb,Got2,Enpp1,Cd44,Klk1,Lsp1,Pcgf2,Kif5c,Ptpn6,Prkar2b,Ptpn11,Cd81,Impdh1,Tyro3,Golga3,Gmeb2,Timm10,Prkacb,Tuba4a,Adcyap1r1,Hnrnph2,Cdh10,Erf,Sms,Smad5,Cacna1c,Dlk1,Dok7,Tmem109,Arglu1,Prrc1,Nr1d1,Slc25a31,Samd5,Klhdc2,Myo16,Crhbp,Rai1,Abcg1,Grm4,Ripor1,Arhgap23,Cyp4x1,Dusp23,Myh14,Fbxo11,…	0.014
93	query_1	TRUE	0.00026545	7333	217	110	0.506912	0.0150007	TF:M10278	TF	Factor: KLF3; motif: NNNNNNGGGCGGGGCNNGN	21700	1874	TF:M00000	TF,TF,TF,TF,TF,TF,TF,TF,TF,TF,TF,TF,TF,TF,TF,TF,TF,TF,TF,TF,TF,TF,TF,TF,TF,TF,TF,TF,TF,TF,TF,TF,TF,TF,TF,TF,TF,TF,TF,TF,TF,TF,TF,TF,TF,TF,TF,TF,TF,TF,TF,TF,TF,TF,TF,TF,TF,TF,TF,TF,TF,TF,TF,TF,TF,TF,TF,TF,TF,TF,TF,TF,TF,TF,TF,TF,TF,TF,TF,TF,TF,TF,TF,TF,TF,TF,TF,TF,TF,TF,TF,TF,TF,TF,TF,TF,TF,TF,TF,TF,TF,TF,TF,TF,TF,TF,TF,TF,TF,TF	Dhtkd1,Tmem74b,Fbxl16,Exoc6b,Ccdc6,Rsbn1l,Pcdh10,Cacna1i,Farp1,Ro60,Gclm,Ddt,Kpna4,Cdk5r2,Nmt2,Dhcr7,Enpp1,Ap2a2,Fas,Prkar2b,Ptpn11,Cd81,Por,Acvr1,Impdh1,Nek1,Pkm,Golga3,Tuba4a,Adcyap1r1,Nos3,Erf,Sms,Cacna1c,Prkcz,Dlk1,Dok7,Pip4p1,Arglu1,Slc25a31,Myo16,Lrrk2,Arcn1,Crhbp,Rai1,Abcg1,Ripor1,Arhgap23,Dusp23,Mtss2,Ranbp10,Fbxo11,Actn1,Ano10,Ptbp3,Serinc5,Dlgap2,Slc9a7,Neto2,Armc6,Pgghg,Ttc12,Tctn1,Cas…	0.015
94	query_1	TRUE	0.000394502	8809	217	125	0.576037	0.01419	TF:M00196	TF	Factor: Sp1; motif: NGGGGGCGGGGYN	21700	3330	TF:M00000	TF,TF,TF,TF,TF,TF,TF,TF,TF,TF,TF,TF,TF,TF,TF,TF,TF,TF,TF,TF,TF,TF,TF,TF,TF,TF,TF,TF,TF,TF,TF,TF,TF,TF,TF,TF,TF,TF,TF,TF,TF,TF,TF,TF,TF,TF,TF,TF,TF,TF,TF,TF,TF,TF,TF,TF,TF,TF,TF,TF,TF,TF,TF,TF,TF,TF,TF,TF,TF,TF,TF,TF,TF,TF,TF,TF,TF,TF,TF,TF,TF,TF,TF,TF,TF,TF,TF,TF,TF,TF,TF,TF,TF,TF,TF,TF,TF,TF,TF,TF,TF,TF,TF,TF,TF,TF,TF,TF,TF,TF,TF,TF,TF,TF,TF,TF,TF,TF,TF,TF,TF,TF,TF,TF,TF	Tmem74b,Fbxl16,Exoc6b,Ccdc6,Rsbn1l,Pigg,Pcdh10,Cacna1i,Farp1,Ro60,Gclm,Ddt,Kpna4,Nmt2,Dhcr7,Enpp1,Ap2a2,Tpi1,Lsp1,Pcgf2,Fas,Ptpn11,Cd81,Por,Acvr1,Impdh1,Nek1,Pkm,Golga3,Acyp2,Tuba4a,Adcyap1r1,Nos3,Erf,Sms,Cacna1c,Prkcz,Dlk1,2300009A05Rik,Dok7,Pip4p1,Arglu1,Slc25a31,Myo16,Lrrk2,Arcn1,Crhbp,Rai1,Abcg1,Ripor1,Arhgap23,Dusp23,Mtss2,Ranbp10,Cyfip1,Fbxo11,Actn1,Pdk1,Ano10,Ptbp3,Atcay,Bmp3,Serinc5,Dlgap…	0.014
95	query_1	TRUE	0.000491669	9528	217	132	0.608295	0.0138539	TF:M02933	TF	Factor: ZF5; motif: GYCGCGCARNGCNN	21700	3950	TF:M00000	TF,TF,TF,TF,TF,TF,TF,TF,TF,TF,TF,TF,TF,TF,TF,TF,TF,TF,TF,TF,TF,TF,TF,TF,TF,TF,TF,TF,TF,TF,TF,TF,TF,TF,TF,TF,TF,TF,TF,TF,TF,TF,TF,TF,TF,TF,TF,TF,TF,TF,TF,TF,TF,TF,TF,TF,TF,TF,TF,TF,TF,TF,TF,TF,TF,TF,TF,TF,TF,TF,TF,TF,TF,TF,TF,TF,TF,TF,TF,TF,TF,TF,TF,TF,TF,TF,TF,TF,TF,TF,TF,TF,TF,TF,TF,TF,TF,TF,TF,TF,TF,TF,TF,TF,TF,TF,TF,TF,TF,TF,TF,TF,TF,TF,TF,TF,TF,TF,TF,TF,TF,TF,TF,TF,TF,TF,TF,TF,TF,TF,TF,TF	Tmem74b,Fbxl16,Exoc6b,Ccdc6,Rsbn1l,Pcdh10,Cacna1i,Nfxl1,Farp1,Ro60,Ntn1,Gclm,Kpna4,Kpna6,Pld3,Cdk5r2,Nmt2,Dhcr7,Got2,Ap2a2,Lsp1,Pcgf2,Kif5c,Prkar2b,Ptpn11,Cd81,Acvr1,Crkl,Impdh1,Nek1,Golga3,Gmeb2,Prkacb,Tuba4a,Adcyap1r1,Hnrnph2,Erf,Sms,Smad5,Cacna1c,Prkcz,Anxa7,Dlk1,2300009A05Rik,Dok7,Arglu1,Prrc1,Slc25a31,Samd5,Myo16,Lrrk2,Arcn1,Rai1,Abcg1,Grm4,Ripor1,Arhgap23,Dusp23,Mtss2,Myh14,Cyfip1,Fbxo11,Ac…	0.014
96	query_1	TRUE	0.000621731	8102	217	117	0.539171	0.0144409	TF:M02872_1	TF	Factor: IRF4; motif: NNNAYTCTCGGWNNN; match class: 1	21700	1787	TF:M02872	TF,TF,TF,TF,TF,TF,TF,TF,TF,TF,TF,TF,TF,TF,TF,TF,TF,TF,TF,TF,TF,TF,TF,TF,TF,TF,TF,TF,TF,TF,TF,TF,TF,TF,TF,TF,TF,TF,TF,TF,TF,TF,TF,TF,TF,TF,TF,TF,TF,TF,TF,TF,TF,TF,TF,TF,TF,TF,TF,TF,TF,TF,TF,TF,TF,TF,TF,TF,TF,TF,TF,TF,TF,TF,TF,TF,TF,TF,TF,TF,TF,TF,TF,TF,TF,TF,TF,TF,TF,TF,TF,TF,TF,TF,TF,TF,TF,TF,TF,TF,TF,TF,TF,TF,TF,TF,TF,TF,TF,TF,TF,TF,TF,TF,TF,TF,TF	Gm5938,Tmem74b,Fbxl16,Exoc6b,Rsbn1l,Pigg,Pcdh10,Or51v14,Wdfy1,Cacna1i,Ro60,Ntn1,Gclm,Kpna4,Cdk5r2,Nmt2,Gosr1,Mb,Got2,Ap2a2,Pcgf2,Fas,Kif5c,Prkar2b,Cd81,Por,Crkl,Pkm,Tyro3,Golga3,Opa1,Prkacb,Tuba4a,Hnrnph2,Cdh10,Cacna1c,Prkcz,2510002D24Rik,Tmem109,Spout1,Prrc1,Slc25a31,Samd5,Klhdc2,Crhbp,Grm4,Ripor1,Isy1,Cyp4x1,Mtss2,Cyfip1,Fbxo11,Fam210a,Ptbp3,Atcay,Serinc5,Dlgap2,Slc9a7,Srp68,Rab3gap2,Neto2,Armc…	0.014
97	query_1	TRUE	0.000682323	6360	217	98	0.451613	0.0154088	TF:M01199	TF	Factor: RNF96; motif: BCCCGCRGCC	21700	3000	TF:M00000	TF,TF,TF,TF,TF,TF,TF,TF,TF,TF,TF,TF,TF,TF,TF,TF,TF,TF,TF,TF,TF,TF,TF,TF,TF,TF,TF,TF,TF,TF,TF,TF,TF,TF,TF,TF,TF,TF,TF,TF,TF,TF,TF,TF,TF,TF,TF,TF,TF,TF,TF,TF,TF,TF,TF,TF,TF,TF,TF,TF,TF,TF,TF,TF,TF,TF,TF,TF,TF,TF,TF,TF,TF,TF,TF,TF,TF,TF,TF,TF,TF,TF,TF,TF,TF,TF,TF,TF,TF,TF,TF,TF,TF,TF,TF,TF,TF,TF	Tmem74b,Fbxl16,Ccdc6,Rsbn1l,Pcdh10,Cacna1i,Nfxl1,Farp1,Kpna4,Kpna6,Cdk5r2,Nmt2,Gosr1,Pomc,Cd44,Ap2a2,Tpi1,Pcgf2,Kif5c,Prkar2b,Ptpn11,Por,Acvr1,Impdh1,Pkm,Gmeb2,Prkacb,Adcyap1r1,Erf,Sms,Smad5,Cacna1c,Prkcz,Dlk1,Dok7,Pip4p1,2510002D24Rik,Arglu1,Prrc1,Nr1d1,Samd5,Klhdc2,Myo16,Abcg1,Grm4,Ripor1,Mtss2,Myh14,Fbxo11,Gtf2a2,Pdk1,Ptbp3,Slc9a7,Srp68,Mon1b,Neto2,Tctn1,Casp9,Sik2,Dpyd,Gatad2a,Cmc2,Angel2,Pph…	0.015
98	query_1	TRUE	0.000752694	7656	217	112	0.516129	0.014629	TF:M01104	TF	Factor: MOVO-B; motif: GNGGGGG	21700	2160	TF:M00000	TF,TF,TF,TF,TF,TF,TF,TF,TF,TF,TF,TF,TF,TF,TF,TF,TF,TF,TF,TF,TF,TF,TF,TF,TF,TF,TF,TF,TF,TF,TF,TF,TF,TF,TF,TF,TF,TF,TF,TF,TF,TF,TF,TF,TF,TF,TF,TF,TF,TF,TF,TF,TF,TF,TF,TF,TF,TF,TF,TF,TF,TF,TF,TF,TF,TF,TF,TF,TF,TF,TF,TF,TF,TF,TF,TF,TF,TF,TF,TF,TF,TF,TF,TF,TF,TF,TF,TF,TF,TF,TF,TF,TF,TF,TF,TF,TF,TF,TF,TF,TF,TF,TF,TF,TF,TF,TF,TF,TF,TF,TF,TF	Tmem74b,Fbxl16,Ccdc6,Rsbn1l,Pigg,Wdfy1,Cacna1i,Farp1,Gclm,Kpna4,Cdk5r2,Nmt2,Dhcr7,Enpp1,Ap2a2,Lsp1,Pcgf2,Fas,Kif5c,Prkar2b,Ptpn11,Por,Acvr1,Impdh1,Nek1,Pkm,Gmeb2,Prkacb,Tuba4a,Adcyap1r1,Cdh10,Erf,Sms,Cacna1c,Prkcz,Dlk1,2300009A05Rik,Dok7,Arglu1,Prrc1,Slc25a31,Myo16,Lrrk2,Arcn1,Crhbp,Rai1,Abcg1,Arhgap23,Cyp4x1,Dusp23,Myh14,Ranbp10,Cyfip1,Fbxo11,Actn1,Gtf2a2,Pdk1,Ano10,Ptbp3,Dlgap2,Slc9a7,Srp68,Rab…	0.015
99	query_1	TRUE	0.000834284	15289	217	184	0.847926	0.0120348	TF:M07289	TF	Factor: GKLF; motif: NNNRGGNGNGGSN	21700	1378	TF:M00000	TF,TF,TF,TF,TF,TF,TF,TF,TF,TF,TF,TF,TF,TF,TF,TF,TF,TF,TF,TF,TF,TF,TF,TF,TF,TF,TF,TF,TF,TF,TF,TF,TF,TF,TF,TF,TF,TF,TF,TF,TF,TF,TF,TF,TF,TF,TF,TF,TF,TF,TF,TF,TF,TF,TF,TF,TF,TF,TF,TF,TF,TF,TF,TF,TF,TF,TF,TF,TF,TF,TF,TF,TF,TF,TF,TF,TF,TF,TF,TF,TF,TF,TF,TF,TF,TF,TF,TF,TF,TF,TF,TF,TF,TF,TF,TF,TF,TF,TF,TF,TF,TF,TF,TF,TF,TF,TF,TF,TF,TF,TF,TF,TF,TF,TF,TF,TF,TF,TF,TF,TF,TF,TF,TF,TF,TF,TF,TF,TF,TF,TF,TF,TF,…	Tmem74b,Fbxl16,Exoc6b,Ccdc6,Rsbn1l,Pigg,Pcdh10,Wdfy1,Cacna1i,Farp1,Ro60,Ntn1,Gclm,Ddt,Kpna4,Pld3,Cdk5r2,Nmt2,Dhcr7,Pomc,Mb,Enpp1,Cd44,Klk1,Klk1b22,Ap2a2,Tpi1,Lsp1,Pcgf2,Fas,Kif5c,Ptpn6,Prkar2b,Ptpn11,Cd81,Por,Acvr1,Impdh1,Nek1,Pkm,Golga3,Acyp2,Mrps21,Opa1,Gmeb2,Prkacb,Tuba4a,Adcyap1r1,Nos3,Hnrnph2,Cdh10,Erf,Smad5,Cacna1c,Prkcz,Anxa7,Dlk1,2300009A05Rik,Dok7,Pip4p1,2510002D24Rik,Tmem109,Spout1,Argl…	0.012
100	query_1	TRUE	0.00114527	14495	217	177	0.815668	0.0122111	TF:M02872	TF	Factor: IRF4; motif: NNNAYTCTCGGWNNN	21700	1786	TF:M00000	TF,TF,TF,TF,TF,TF,TF,TF,TF,TF,TF,TF,TF,TF,TF,TF,TF,TF,TF,TF,TF,TF,TF,TF,TF,TF,TF,TF,TF,TF,TF,TF,TF,TF,TF,TF,TF,TF,TF,TF,TF,TF,TF,TF,TF,TF,TF,TF,TF,TF,TF,TF,TF,TF,TF,TF,TF,TF,TF,TF,TF,TF,TF,TF,TF,TF,TF,TF,TF,TF,TF,TF,TF,TF,TF,TF,TF,TF,TF,TF,TF,TF,TF,TF,TF,TF,TF,TF,TF,TF,TF,TF,TF,TF,TF,TF,TF,TF,TF,TF,TF,TF,TF,TF,TF,TF,TF,TF,TF,TF,TF,TF,TF,TF,TF,TF,TF,TF,TF,TF,TF,TF,TF,TF,TF,TF,TF,TF,TF,TF,TF,TF,TF,…	Gm5938,Dhtkd1,Tmem74b,Fbxl16,Exoc6b,Ccdc6,Rsbn1l,Pigg,Pcdh10,Or51v14,Wdfy1,Cacna1i,Farp1,Ro60,Ntn1,Gclm,Ddt,Kpna4,Cdk5r2,Nmt2,Gosr1,Mb,Got2,Cd44,Ap2a2,Tpi1,Lsp1,Pcgf2,Ndn,Fas,Klkb1,Kif5c,Ptpn6,Prkar2b,Ptpn11,Cd81,Por,Acvr1,Crkl,Impdh1,Nek1,Pkm,Tyro3,Golga3,Mrps21,Opa1,Gmeb2,Timm10,Prkacb,Tuba4a,Adcyap1r1,Nos3,Hnrnph2,Cdh10,Cacna1c,Prkcz,Anxa7,Dlk1,2510002D24Rik,Tmem109,Spout1,Prrc1,Nr1d1,Gpr149,S…	0.012
101	query_1	TRUE	0.0011473	6971	217	104	0.479263	0.014919	TF:M01979	TF	Factor: ELF4; motif: CCCGGAARTN	21700	910	TF:M00000	TF,TF,TF,TF,TF,TF,TF,TF,TF,TF,TF,TF,TF,TF,TF,TF,TF,TF,TF,TF,TF,TF,TF,TF,TF,TF,TF,TF,TF,TF,TF,TF,TF,TF,TF,TF,TF,TF,TF,TF,TF,TF,TF,TF,TF,TF,TF,TF,TF,TF,TF,TF,TF,TF,TF,TF,TF,TF,TF,TF,TF,TF,TF,TF,TF,TF,TF,TF,TF,TF,TF,TF,TF,TF,TF,TF,TF,TF,TF,TF,TF,TF,TF,TF,TF,TF,TF,TF,TF,TF,TF,TF,TF,TF,TF,TF,TF,TF,TF,TF,TF,TF,TF,TF	Tmem74b,Ccdc6,Pigg,Wdfy1,Nfxl1,Farp1,Ro60,Pld3,Nmt2,Dhcr7,Gosr1,Enpp1,Lsp1,Fas,Prkar2b,Ptpn11,Acvr1,Tyro3,Golga3,Acyp2,Mrps21,Opa1,Gmeb2,Timm10,Prkacb,Adcyap1r1,Sms,Prkcz,Dlk1,Tmem109,Arglu1,Samd5,Klhdc2,Arcn1,Crhbp,Rai1,Grm4,Isy1,Dusp23,Cyfip1,Gtf2a2,Fam210a,Ptbp3,Serinc5,Rab3gap2,Mon1b,Armc6,Casp9,Sik2,Aqr,Dpyd,Gatad2a,Pphln1,Aldh1l1,Znfx1,Ubac2,Zc3h10,Gle1,2310022A10Rik,Rttn,Tmx1,Gtf2h3,Ubac1,…	0.015
102	query_1	TRUE	0.00115256	8959	217	125	0.576037	0.0139524	TF:M00932	TF	Factor: Sp1; motif: NNGGGGCGGGGNN	21700	3328	TF:M00000	TF,TF,TF,TF,TF,TF,TF,TF,TF,TF,TF,TF,TF,TF,TF,TF,TF,TF,TF,TF,TF,TF,TF,TF,TF,TF,TF,TF,TF,TF,TF,TF,TF,TF,TF,TF,TF,TF,TF,TF,TF,TF,TF,TF,TF,TF,TF,TF,TF,TF,TF,TF,TF,TF,TF,TF,TF,TF,TF,TF,TF,TF,TF,TF,TF,TF,TF,TF,TF,TF,TF,TF,TF,TF,TF,TF,TF,TF,TF,TF,TF,TF,TF,TF,TF,TF,TF,TF,TF,TF,TF,TF,TF,TF,TF,TF,TF,TF,TF,TF,TF,TF,TF,TF,TF,TF,TF,TF,TF,TF,TF,TF,TF,TF,TF,TF,TF,TF,TF,TF,TF,TF,TF,TF,TF	Tmem74b,Fbxl16,Exoc6b,Ccdc6,Rsbn1l,Pigg,Pcdh10,Cacna1i,Farp1,Ro60,Gclm,Ddt,Kpna4,Nmt2,Dhcr7,Enpp1,Ap2a2,Tpi1,Lsp1,Pcgf2,Fas,Ptpn11,Cd81,Por,Acvr1,Impdh1,Nek1,Pkm,Golga3,Acyp2,Gmeb2,Tuba4a,Adcyap1r1,Nos3,Erf,Sms,Cacna1c,Prkcz,Dlk1,2300009A05Rik,Dok7,Pip4p1,Arglu1,Slc25a31,Myo16,Lrrk2,Arcn1,Crhbp,Rai1,Abcg1,Ripor1,Arhgap23,Cyp4x1,Dusp23,Mtss2,Ranbp10,Cyfip1,Fbxo11,Actn1,Pdk1,Ano10,Ptbp3,Atcay,Bmp3,…	0.014
103	query_1	TRUE	0.00116424	4190	217	72	0.331797	0.0171838	TF:M00931_1	TF	Factor: Sp1; motif: GGGGCGGGGC; match class: 1	21700	3333	TF:M00931	TF,TF,TF,TF,TF,TF,TF,TF,TF,TF,TF,TF,TF,TF,TF,TF,TF,TF,TF,TF,TF,TF,TF,TF,TF,TF,TF,TF,TF,TF,TF,TF,TF,TF,TF,TF,TF,TF,TF,TF,TF,TF,TF,TF,TF,TF,TF,TF,TF,TF,TF,TF,TF,TF,TF,TF,TF,TF,TF,TF,TF,TF,TF,TF,TF,TF,TF,TF,TF,TF,TF,TF	Tmem74b,Fbxl16,Exoc6b,Ccdc6,Farp1,Ro60,Nmt2,Dhcr7,Enpp1,Ap2a2,Pcgf2,Fas,Ptpn11,Cd81,Acvr1,Impdh1,Nek1,Pkm,Tuba4a,Erf,2300009A05Rik,Dok7,Pip4p1,Arglu1,Slc25a31,Myo16,Arcn1,Rai1,Abcg1,Ripor1,Arhgap23,Dusp23,Ranbp10,Fbxo11,Actn1,Ano10,Ptbp3,Serinc5,Slc9a7,Neto2,Ttc12,Tctn1,Casp9,Sik2,Dpyd,Gatad2a,Cmc2,Angel2,Znfx1,Slco3a1,Ubac1,Dtnbp1,Sh3bp4,Ppp1r16a,Neurl1a,Smc6,Stk24,Zdhhc6,Chmp3,Gadd45gip1,Lage3,…	0.017
104	query_1	TRUE	0.00118911	6702	217	101	0.465438	0.0150701	TF:M05547	TF	Factor: ZAC; motif: KGGGCCR	21700	3882	TF:M00000	TF,TF,TF,TF,TF,TF,TF,TF,TF,TF,TF,TF,TF,TF,TF,TF,TF,TF,TF,TF,TF,TF,TF,TF,TF,TF,TF,TF,TF,TF,TF,TF,TF,TF,TF,TF,TF,TF,TF,TF,TF,TF,TF,TF,TF,TF,TF,TF,TF,TF,TF,TF,TF,TF,TF,TF,TF,TF,TF,TF,TF,TF,TF,TF,TF,TF,TF,TF,TF,TF,TF,TF,TF,TF,TF,TF,TF,TF,TF,TF,TF,TF,TF,TF,TF,TF,TF,TF,TF,TF,TF,TF,TF,TF,TF,TF,TF,TF,TF,TF,TF	Tmem74b,Exoc6b,Ccdc6,Pigg,Pcdh10,Wdfy1,Cacna1i,Nfxl1,Farp1,Gclm,Ddt,Kpna4,Kpna6,Cdk5r2,Nmt2,Got2,Ap2a2,Tpi1,Pcgf2,Fas,Kif5c,Prkar2b,Ptpn11,Cd81,Por,Acvr1,Impdh1,Opa1,Prkacb,Adcyap1r1,Cdh10,Erf,Sms,Smad5,Prkcz,Dlk1,2300009A05Rik,Dok7,Arglu1,Prrc1,Slc25a31,Samd5,Klhdc2,Arcn1,Rai1,Abcg1,Grm4,Arhgap23,Cyp4x1,Dusp23,Mtss2,Myh14,Cyfip1,Fbxo11,Actn1,Gtf2a2,Fam210a,Ano10,Slc9a7,Pgghg,Tctn1,Tmt1a,Tsku,Sik…	0.015
105	query_1	TRUE	0.00144483	2494	217	50	0.230415	0.0200481	TF:M07415_1	TF	Factor: Elf-1; motif: AWCCCGGAAGTN; match class: 1	21700	901	TF:M07415	TF,TF,TF,TF,TF,TF,TF,TF,TF,TF,TF,TF,TF,TF,TF,TF,TF,TF,TF,TF,TF,TF,TF,TF,TF,TF,TF,TF,TF,TF,TF,TF,TF,TF,TF,TF,TF,TF,TF,TF,TF,TF,TF,TF,TF,TF,TF,TF,TF,TF	Ccdc6,Nfxl1,Farp1,Pld3,Enpp1,Fas,Tyro3,Golga3,Mrps21,Timm10,Sms,Nr1d1,Samd5,Klhdc2,Grm4,Isy1,Dusp23,Gtf2a2,Fam210a,Ptbp3,Mon1b,Casp9,Sik2,Aqr,Gatad2a,Pphln1,Aldh1l1,Ubac2,2310022A10Rik,Ubac1,Bloc1s4,Cbr4,Ppp1r16a,Smc6,Eps8l2,Stk24,Zdhhc6,Chmp3,Rpa3,Lage3,Tomm34,Wars2,Cmtm6,Zcrb1,Crot,Stk4,Nqo2,Selenok,Srd5a3,Bnip3l	0.02
106	query_1	TRUE	0.0015437	5929	217	92	0.423963	0.015517	TF:M09682	TF	Factor: E2F-4; motif: GNNGGCGGGAAN	21700	772	TF:M00000	TF,TF,TF,TF,TF,TF,TF,TF,TF,TF,TF,TF,TF,TF,TF,TF,TF,TF,TF,TF,TF,TF,TF,TF,TF,TF,TF,TF,TF,TF,TF,TF,TF,TF,TF,TF,TF,TF,TF,TF,TF,TF,TF,TF,TF,TF,TF,TF,TF,TF,TF,TF,TF,TF,TF,TF,TF,TF,TF,TF,TF,TF,TF,TF,TF,TF,TF,TF,TF,TF,TF,TF,TF,TF,TF,TF,TF,TF,TF,TF,TF,TF,TF,TF,TF,TF,TF,TF,TF,TF,TF,TF	Dhtkd1,Tmem74b,Ccdc6,Rsbn1l,Pigg,Nfxl1,Ro60,Pld3,Nmt2,Dhcr7,Tpi1,Pcgf2,Prkar2b,Cd81,Por,Acvr1,Nek1,Pkm,Golga3,Timm10,Prkacb,Tuba4a,Adcyap1r1,Sms,Cacna1c,2300009A05Rik,Dok7,Pip4p1,Spout1,Arglu1,Slc25a31,Samd5,Klhdc2,Myo16,Crhbp,Rai1,Arhgap23,Isy1,Cyp4x1,Mtss2,Myh14,Fbxo11,Actn1,Fam210a,Ano10,Ptbp3,Serinc5,Rab3gap2,Mon1b,Tctn1,Tsku,Sik2,Dpyd,Gatad2a,Cmc2,Pphln1,Ablim1,Zc3h10,Slco3a1,2310022A10Rik,G…	0.016
107	query_1	TRUE	0.00225697	7902	217	113	0.520737	0.0143002	TF:M01989	TF	Factor: Ets2; motif: ACCGGAWRYN	21700	466	TF:M00000	TF,TF,TF,TF,TF,TF,TF,TF,TF,TF,TF,TF,TF,TF,TF,TF,TF,TF,TF,TF,TF,TF,TF,TF,TF,TF,TF,TF,TF,TF,TF,TF,TF,TF,TF,TF,TF,TF,TF,TF,TF,TF,TF,TF,TF,TF,TF,TF,TF,TF,TF,TF,TF,TF,TF,TF,TF,TF,TF,TF,TF,TF,TF,TF,TF,TF,TF,TF,TF,TF,TF,TF,TF,TF,TF,TF,TF,TF,TF,TF,TF,TF,TF,TF,TF,TF,TF,TF,TF,TF,TF,TF,TF,TF,TF,TF,TF,TF,TF,TF,TF,TF,TF,TF,TF,TF,TF,TF,TF,TF,TF,TF,TF	Ccdc6,Rsbn1l,Pigg,Wdfy1,Nfxl1,Farp1,Ro60,Pld3,Cdk5r2,Nmt2,Dhcr7,Gosr1,Enpp1,Cd44,Ap2a2,Lsp1,Ndn,Fas,Kif5c,Ptpn11,Crkl,Nek1,Tyro3,Golga3,Acyp2,Mrps21,Opa1,Gmeb2,Timm10,Prkacb,Tuba4a,Adcyap1r1,Cdh10,Sms,Cacna1c,Dlk1,2300009A05Rik,Tmem109,Spout1,Arglu1,Nr1d1,Slc25a31,Samd5,Klhdc2,Arcn1,Crhbp,Rai1,Grm4,Isy1,Dusp23,Cyfip1,Gtf2a2,Fam210a,Ano10,Ptbp3,Atcay,Serinc5,Rab3gap2,Mon1b,Neto2,Casp9,Tmt1a,Tsku,S…	0.014
108	query_1	TRUE	0.00225866	3140	217	58	0.267281	0.0184713	TF:M10278_1	TF	Factor: KLF3; motif: NNNNNNGGGCGGGGCNNGN; match class: 1	21700	1875	TF:M10278	TF,TF,TF,TF,TF,TF,TF,TF,TF,TF,TF,TF,TF,TF,TF,TF,TF,TF,TF,TF,TF,TF,TF,TF,TF,TF,TF,TF,TF,TF,TF,TF,TF,TF,TF,TF,TF,TF,TF,TF,TF,TF,TF,TF,TF,TF,TF,TF,TF,TF,TF,TF,TF,TF,TF,TF,TF,TF	Tmem74b,Fbxl16,Farp1,Ro60,Nmt2,Enpp1,Ap2a2,Fas,Ptpn11,Cd81,Acvr1,Nek1,Pkm,Tuba4a,Erf,Dok7,Pip4p1,Arglu1,Slc25a31,Arcn1,Rai1,Abcg1,Ripor1,Arhgap23,Dusp23,Fbxo11,Actn1,Ano10,Ptbp3,Serinc5,Neto2,Ttc12,Tctn1,Casp9,Sik2,Dpyd,Gatad2a,Angel2,Znfx1,Tcf25,Ubac1,Dtnbp1,Sh3bp4,Ppp1r16a,Smc6,Stk24,Chmp3,Gadd45gip1,Lage3,Tomm34,Cmtm6,Tbcb,Naa38,Efhd1,Slc23a2,Pfn2,Morf4l2,Ehmt2	0.018
109	query_1	TRUE	0.00286822	8413	217	118	0.543779	0.0140259	TF:M01986	TF	Factor: c-ets-1; motif: ACCGGAWRYN	21700	462	TF:M00000	TF,TF,TF,TF,TF,TF,TF,TF,TF,TF,TF,TF,TF,TF,TF,TF,TF,TF,TF,TF,TF,TF,TF,TF,TF,TF,TF,TF,TF,TF,TF,TF,TF,TF,TF,TF,TF,TF,TF,TF,TF,TF,TF,TF,TF,TF,TF,TF,TF,TF,TF,TF,TF,TF,TF,TF,TF,TF,TF,TF,TF,TF,TF,TF,TF,TF,TF,TF,TF,TF,TF,TF,TF,TF,TF,TF,TF,TF,TF,TF,TF,TF,TF,TF,TF,TF,TF,TF,TF,TF,TF,TF,TF,TF,TF,TF,TF,TF,TF,TF,TF,TF,TF,TF,TF,TF,TF,TF,TF,TF,TF,TF,TF,TF,TF,TF,TF,TF	Tmem74b,Ccdc6,Pigg,Wdfy1,Nfxl1,Farp1,Ro60,Pld3,Cdk5r2,Nmt2,Dhcr7,Gosr1,Enpp1,Ap2a2,Tpi1,Lsp1,Fas,Kif5c,Prkar2b,Ptpn11,Crkl,Nek1,Tyro3,Golga3,Acyp2,Mrps21,Gmeb2,Timm10,Prkacb,Tuba4a,Adcyap1r1,Sms,Cacna1c,Dlk1,2300009A05Rik,Tmem109,Spout1,Arglu1,Nr1d1,Slc25a31,Samd5,Klhdc2,Myo16,Arcn1,Crhbp,Rai1,Grm4,Isy1,Dusp23,Cyfip1,Gtf2a2,Fam210a,Ano10,Ptbp3,Atcay,Serinc5,Rab3gap2,Mon1b,Neto2,Pgghg,Casp9,Tmt1a,…	0.014
110	query_1	TRUE	0.00327842	11131	217	145	0.668203	0.0130267	TF:M07991_1	TF	Factor: Hes1; motif: NNCACGYGNN; match class: 1	21700	1469	TF:M07991	TF,TF,TF,TF,TF,TF,TF,TF,TF,TF,TF,TF,TF,TF,TF,TF,TF,TF,TF,TF,TF,TF,TF,TF,TF,TF,TF,TF,TF,TF,TF,TF,TF,TF,TF,TF,TF,TF,TF,TF,TF,TF,TF,TF,TF,TF,TF,TF,TF,TF,TF,TF,TF,TF,TF,TF,TF,TF,TF,TF,TF,TF,TF,TF,TF,TF,TF,TF,TF,TF,TF,TF,TF,TF,TF,TF,TF,TF,TF,TF,TF,TF,TF,TF,TF,TF,TF,TF,TF,TF,TF,TF,TF,TF,TF,TF,TF,TF,TF,TF,TF,TF,TF,TF,TF,TF,TF,TF,TF,TF,TF,TF,TF,TF,TF,TF,TF,TF,TF,TF,TF,TF,TF,TF,TF,TF,TF,TF,TF,TF,TF,TF,TF,…	Dhtkd1,Tmem74b,Fbxl16,Exoc6b,Ccdc6,Pigg,Wdfy1,Cacna1i,Nfxl1,Farp1,Ddt,Kpna4,Kpna6,Nmt2,Dhcr7,Got2,Enpp1,Ap2a2,Tpi1,Lsp1,Pcgf2,Fas,Kif5c,Ptpn6,Prkar2b,Ptpn11,Por,Acvr1,Crkl,Impdh1,Nek1,Pkm,Tyro3,Golga3,Gmeb2,Timm10,Prkacb,Tuba4a,Nos3,Hnrnph2,Erf,Sms,Smad5,Cacna1c,Prkcz,Anxa7,Dlk1,2300009A05Rik,Dok7,Pip4p1,2510002D24Rik,Tmem109,Spout1,Prrc1,Nr1d1,Slc25a31,Samd5,Myo16,Lrrk2,Rai1,Grm4,Ripor1,Arhgap23…	0.013
111	query_1	TRUE	0.00402142	7608	217	109	0.502304	0.014327	TF:M07277	TF	Factor: BTEB2; motif: RGGGNGKGGN	21700	342	TF:M00000	TF,TF,TF,TF,TF,TF,TF,TF,TF,TF,TF,TF,TF,TF,TF,TF,TF,TF,TF,TF,TF,TF,TF,TF,TF,TF,TF,TF,TF,TF,TF,TF,TF,TF,TF,TF,TF,TF,TF,TF,TF,TF,TF,TF,TF,TF,TF,TF,TF,TF,TF,TF,TF,TF,TF,TF,TF,TF,TF,TF,TF,TF,TF,TF,TF,TF,TF,TF,TF,TF,TF,TF,TF,TF,TF,TF,TF,TF,TF,TF,TF,TF,TF,TF,TF,TF,TF,TF,TF,TF,TF,TF,TF,TF,TF,TF,TF,TF,TF,TF,TF,TF,TF,TF,TF,TF,TF,TF,TF	Tmem74b,Exoc6b,Ccdc6,Pigg,Pcdh10,Cacna1i,Farp1,Ro60,Gclm,Ddt,Cdk5r2,Nmt2,Dhcr7,Enpp1,Ap2a2,Lsp1,Pcgf2,Fas,Ptpn11,Cd81,Acvr1,Impdh1,Nek1,Pkm,Golga3,Acyp2,Gmeb2,Nos3,Erf,Sms,Cacna1c,Prkcz,Dok7,Pip4p1,Arglu1,Slc25a31,Samd5,Myo16,Lrrk2,Arcn1,Crhbp,Rai1,Abcg1,Ripor1,Arhgap23,Cyp4x1,Dusp23,Mtss2,Ranbp10,Cyfip1,Fbxo11,Actn1,Pdk1,Ano10,Ptbp3,Atcay,Bmp3,Serinc5,Dlgap2,Slc9a7,Rab3gap2,Neto2,Ttc12,Tctn1,Cas…	0.014
112	query_1	TRUE	0.00445109	4257	217	71	0.327189	0.0166784	TF:M00196_1	TF	Factor: Sp1; motif: NGGGGGCGGGGYN; match class: 1	21700	3331	TF:M00196	TF,TF,TF,TF,TF,TF,TF,TF,TF,TF,TF,TF,TF,TF,TF,TF,TF,TF,TF,TF,TF,TF,TF,TF,TF,TF,TF,TF,TF,TF,TF,TF,TF,TF,TF,TF,TF,TF,TF,TF,TF,TF,TF,TF,TF,TF,TF,TF,TF,TF,TF,TF,TF,TF,TF,TF,TF,TF,TF,TF,TF,TF,TF,TF,TF,TF,TF,TF,TF,TF,TF	Tmem74b,Fbxl16,Exoc6b,Ccdc6,Farp1,Ro60,Nmt2,Dhcr7,Enpp1,Ap2a2,Fas,Ptpn11,Cd81,Por,Acvr1,Impdh1,Nek1,Pkm,Tuba4a,Dok7,Pip4p1,Arglu1,Slc25a31,Myo16,Arcn1,Rai1,Abcg1,Ripor1,Arhgap23,Dusp23,Ranbp10,Fbxo11,Actn1,Ano10,Ptbp3,Atcay,Serinc5,Slc9a7,Neto2,Ttc12,Tctn1,Casp9,Sik2,Dpyd,Gatad2a,Cmc2,Angel2,Ablim1,Znfx1,Ubac1,Dtnbp1,Sh3bp4,Ppp1r16a,Smc6,Eps8l2,Stk24,Chmp3,Gadd45gip1,Lage3,Ears2,Tomm34,Cmtm6,Tbcb…	0.017
113	query_1	TRUE	0.00642442	6658	217	98	0.451613	0.0147191	TF:M03893	TF	Factor: WT1; motif: GNGGGGGCGGGG	21700	3852	TF:M00000	TF,TF,TF,TF,TF,TF,TF,TF,TF,TF,TF,TF,TF,TF,TF,TF,TF,TF,TF,TF,TF,TF,TF,TF,TF,TF,TF,TF,TF,TF,TF,TF,TF,TF,TF,TF,TF,TF,TF,TF,TF,TF,TF,TF,TF,TF,TF,TF,TF,TF,TF,TF,TF,TF,TF,TF,TF,TF,TF,TF,TF,TF,TF,TF,TF,TF,TF,TF,TF,TF,TF,TF,TF,TF,TF,TF,TF,TF,TF,TF,TF,TF,TF,TF,TF,TF,TF,TF,TF,TF,TF,TF,TF,TF,TF,TF,TF,TF	Tmem74b,Fbxl16,Ccdc6,Rsbn1l,Pigg,Cacna1i,Farp1,Ntn1,Kpna4,Nmt2,Dhcr7,Enpp1,Ap2a2,Lsp1,Fas,Prkar2b,Ptpn11,Cd81,Por,Acvr1,Impdh1,Nek1,Tuba4a,Adcyap1r1,Cdh10,Erf,Sms,Smad5,Cacna1c,Dlk1,2300009A05Rik,Dok7,Pip4p1,Arglu1,Slc25a31,Lrrk2,Arcn1,Rai1,Abcg1,Grm4,Arhgap23,Dusp23,Ranbp10,Fbxo11,Actn1,Pdk1,Ptbp3,Atcay,Slc9a7,Srp68,Rab3gap2,Mon1b,Neto2,Armc6,Ttc12,Tctn1,Casp9,Sik2,Gatad2a,Angel2,Ablim1,Znfx1,Gl…	0.015
114	query_1	TRUE	0.00693683	11145	217	144	0.663594	0.0129206	TF:M03876	TF	Factor: Kaiso; motif: GCMGGGRGCRGS	21700	1858	TF:M00000	TF,TF,TF,TF,TF,TF,TF,TF,TF,TF,TF,TF,TF,TF,TF,TF,TF,TF,TF,TF,TF,TF,TF,TF,TF,TF,TF,TF,TF,TF,TF,TF,TF,TF,TF,TF,TF,TF,TF,TF,TF,TF,TF,TF,TF,TF,TF,TF,TF,TF,TF,TF,TF,TF,TF,TF,TF,TF,TF,TF,TF,TF,TF,TF,TF,TF,TF,TF,TF,TF,TF,TF,TF,TF,TF,TF,TF,TF,TF,TF,TF,TF,TF,TF,TF,TF,TF,TF,TF,TF,TF,TF,TF,TF,TF,TF,TF,TF,TF,TF,TF,TF,TF,TF,TF,TF,TF,TF,TF,TF,TF,TF,TF,TF,TF,TF,TF,TF,TF,TF,TF,TF,TF,TF,TF,TF,TF,TF,TF,TF,TF,TF,TF,…	Tmem74b,Fbxl16,Ccdc6,Rsbn1l,Pcdh10,Cacna1i,Nfxl1,Farp1,Ro60,Ntn1,Gclm,Kpna4,Pld3,Cdk5r2,Pomc,Enpp1,Cd44,Klk1,Tpi1,Fas,Kif5c,Ptpn6,Prkar2b,Ptpn11,Cd81,Por,Acvr1,Crkl,Impdh1,Nek1,Pkm,Tyro3,Golga3,Acyp2,Mrps21,Opa1,Gmeb2,Timm10,Prkacb,Tuba4a,Adcyap1r1,Nos3,Erf,Sms,Smad5,Cacna1c,Dlk1,2300009A05Rik,Dok7,2510002D24Rik,Tmem109,Spout1,Arglu1,Prrc1,Nr1d1,Samd5,Klhdc2,Myo16,Lrrk2,Arcn1,Crhbp,Rai1,Abcg1,Grm…	0.013
115	query_1	TRUE	0.00863965	8772	217	120	0.552995	0.0136799	TF:M00933	TF	Factor: Sp1; motif: CCCCGCCCCN	21700	3324	TF:M00000	TF,TF,TF,TF,TF,TF,TF,TF,TF,TF,TF,TF,TF,TF,TF,TF,TF,TF,TF,TF,TF,TF,TF,TF,TF,TF,TF,TF,TF,TF,TF,TF,TF,TF,TF,TF,TF,TF,TF,TF,TF,TF,TF,TF,TF,TF,TF,TF,TF,TF,TF,TF,TF,TF,TF,TF,TF,TF,TF,TF,TF,TF,TF,TF,TF,TF,TF,TF,TF,TF,TF,TF,TF,TF,TF,TF,TF,TF,TF,TF,TF,TF,TF,TF,TF,TF,TF,TF,TF,TF,TF,TF,TF,TF,TF,TF,TF,TF,TF,TF,TF,TF,TF,TF,TF,TF,TF,TF,TF,TF,TF,TF,TF,TF,TF,TF,TF,TF,TF,TF	Tmem74b,Fbxl16,Exoc6b,Ccdc6,Rsbn1l,Pigg,Pcdh10,Cacna1i,Farp1,Ro60,Gclm,Ddt,Nmt2,Dhcr7,Enpp1,Cd44,Ap2a2,Tpi1,Lsp1,Pcgf2,Fas,Ptpn11,Cd81,Por,Acvr1,Impdh1,Nek1,Pkm,Golga3,Acyp2,Gmeb2,Prkacb,Tuba4a,Adcyap1r1,Nos3,Hnrnph2,Cdh10,Erf,Sms,Smad5,Cacna1c,Prkcz,Dlk1,2300009A05Rik,Dok7,Pip4p1,Arglu1,Slc25a31,Myo16,Lrrk2,Arcn1,Crhbp,Rai1,Abcg1,Ripor1,Arhgap23,Cyp4x1,Dusp23,Mtss2,Ranbp10,Cyfip1,Fbxo11,Actn1,Pd…	0.014
116	query_1	TRUE	0.00867617	7533	217	107	0.493088	0.0142042	TF:M02036	TF	Factor: WT1; motif: CGCCCCCNCN	21700	3850	TF:M00000	TF,TF,TF,TF,TF,TF,TF,TF,TF,TF,TF,TF,TF,TF,TF,TF,TF,TF,TF,TF,TF,TF,TF,TF,TF,TF,TF,TF,TF,TF,TF,TF,TF,TF,TF,TF,TF,TF,TF,TF,TF,TF,TF,TF,TF,TF,TF,TF,TF,TF,TF,TF,TF,TF,TF,TF,TF,TF,TF,TF,TF,TF,TF,TF,TF,TF,TF,TF,TF,TF,TF,TF,TF,TF,TF,TF,TF,TF,TF,TF,TF,TF,TF,TF,TF,TF,TF,TF,TF,TF,TF,TF,TF,TF,TF,TF,TF,TF,TF,TF,TF,TF,TF,TF,TF,TF,TF	Dhtkd1,Fbxl16,Exoc6b,Ccdc6,Rsbn1l,Cacna1i,Nfxl1,Farp1,Ntn1,Gclm,Pld3,Cdk5r2,Nmt2,Dhcr7,Pomc,Got2,Enpp1,Ap2a2,Lsp1,Fas,Kif5c,Prkar2b,Ptpn11,Acvr1,Impdh1,Nek1,Tyro3,Golga3,Tuba4a,Adcyap1r1,Erf,Sms,Smad5,Cacna1c,Dlk1,2300009A05Rik,Dok7,Pip4p1,Arglu1,Nr1d1,Slc25a31,Klhdc2,Lrrk2,Arcn1,Rai1,Abcg1,Grm4,Arhgap23,Dusp23,Mtss2,Ranbp10,Fbxo11,Actn1,Pdk1,Ptbp3,Atcay,Srp68,Rab3gap2,Mon1b,Armc6,Tctn1,Casp9,Sik…	0.014
117	query_1	TRUE	0.00897135	9962	217	132	0.608295	0.0132504	TF:M01991	TF	Factor: PEA3; motif: RCCGGAAGYN	21700	2734	TF:M00000	TF,TF,TF,TF,TF,TF,TF,TF,TF,TF,TF,TF,TF,TF,TF,TF,TF,TF,TF,TF,TF,TF,TF,TF,TF,TF,TF,TF,TF,TF,TF,TF,TF,TF,TF,TF,TF,TF,TF,TF,TF,TF,TF,TF,TF,TF,TF,TF,TF,TF,TF,TF,TF,TF,TF,TF,TF,TF,TF,TF,TF,TF,TF,TF,TF,TF,TF,TF,TF,TF,TF,TF,TF,TF,TF,TF,TF,TF,TF,TF,TF,TF,TF,TF,TF,TF,TF,TF,TF,TF,TF,TF,TF,TF,TF,TF,TF,TF,TF,TF,TF,TF,TF,TF,TF,TF,TF,TF,TF,TF,TF,TF,TF,TF,TF,TF,TF,TF,TF,TF,TF,TF,TF,TF,TF,TF,TF,TF,TF,TF,TF,TF	Tmem74b,Ccdc6,Rsbn1l,Pigg,Wdfy1,Nfxl1,Farp1,Ro60,Kpna4,Pld3,Cdk5r2,Nmt2,Dhcr7,Gosr1,Enpp1,Cd44,Ap2a2,Lsp1,Pcgf2,Ndn,Fas,Kif5c,Prkar2b,Ptpn11,Acvr1,Crkl,Nek1,Tyro3,Golga3,Acyp2,Mrps21,Opa1,Gmeb2,Timm10,Prkacb,Tuba4a,Adcyap1r1,Cdh10,Sms,Cacna1c,Dlk1,2300009A05Rik,Tmem109,Spout1,Arglu1,Nr1d1,Slc25a31,Samd5,Klhdc2,Arcn1,Crhbp,Rai1,Grm4,Isy1,Dusp23,Cyfip1,Fbxo11,Actn1,Gtf2a2,Fam210a,Ano10,Ptbp3,Atcay,…	0.013
118	query_1	TRUE	0.00915555	5986	217	90	0.414747	0.0150351	TF:M00431	TF	Factor: E2F-1; motif: TTTSGCGS	21700	756	TF:M00000	TF,TF,TF,TF,TF,TF,TF,TF,TF,TF,TF,TF,TF,TF,TF,TF,TF,TF,TF,TF,TF,TF,TF,TF,TF,TF,TF,TF,TF,TF,TF,TF,TF,TF,TF,TF,TF,TF,TF,TF,TF,TF,TF,TF,TF,TF,TF,TF,TF,TF,TF,TF,TF,TF,TF,TF,TF,TF,TF,TF,TF,TF,TF,TF,TF,TF,TF,TF,TF,TF,TF,TF,TF,TF,TF,TF,TF,TF,TF,TF,TF,TF,TF,TF,TF,TF,TF,TF,TF,TF	Fbxl16,Rsbn1l,Pcdh10,Cacna1i,Nfxl1,Farp1,Ntn1,Ddt,Pld3,Nmt2,Enpp1,Cd44,Pcgf2,Kif5c,Prkar2b,Cd81,Opa1,Gmeb2,Prkacb,Adcyap1r1,Hnrnph2,Cdh10,Sms,Cacna1c,Prkcz,2300009A05Rik,Spout1,Arglu1,Prrc1,Slc25a31,Klhdc2,Myo16,Rai1,Ripor1,Cyp4x1,Mtss2,Fbxo11,Actn1,Pdk1,Ptbp3,Serinc5,Slc9a7,Rab3gap2,Neto2,Armc6,Pgghg,Tctn1,Casp9,Sik2,Aqr,Dpyd,Gatad2a,Pphln1,Znfx1,Ubac2,Slco3a1,2310022A10Rik,Rttn,Tmx1,Tapbpl,Ubac…	0.015
119	query_1	TRUE	0.00983981	6994	217	101	0.465438	0.0144409	TF:M10211	TF	Factor: E2F-4; motif: NGGGGGCGGGRMNN	21700	774	TF:M00000	TF,TF,TF,TF,TF,TF,TF,TF,TF,TF,TF,TF,TF,TF,TF,TF,TF,TF,TF,TF,TF,TF,TF,TF,TF,TF,TF,TF,TF,TF,TF,TF,TF,TF,TF,TF,TF,TF,TF,TF,TF,TF,TF,TF,TF,TF,TF,TF,TF,TF,TF,TF,TF,TF,TF,TF,TF,TF,TF,TF,TF,TF,TF,TF,TF,TF,TF,TF,TF,TF,TF,TF,TF,TF,TF,TF,TF,TF,TF,TF,TF,TF,TF,TF,TF,TF,TF,TF,TF,TF,TF,TF,TF,TF,TF,TF,TF,TF,TF,TF,TF	Dhtkd1,Tmem74b,Fbxl16,Ccdc6,Pigg,Cacna1i,Ro60,Ddt,Pld3,Nmt2,Dhcr7,Ap2a2,Tpi1,Lsp1,Pcgf2,Fas,Prkar2b,Cd81,Por,Impdh1,Nek1,Pkm,Golga3,Timm10,Prkacb,Tuba4a,Adcyap1r1,Erf,Sms,Cacna1c,2300009A05Rik,Dok7,Pip4p1,Arglu1,Slc25a31,Klhdc2,Myo16,Lrrk2,Arcn1,Crhbp,Rai1,Abcg1,Arhgap23,Cyp4x1,Dusp23,Myh14,Ranbp10,Fbxo11,Actn1,Pdk1,Ano10,Ptbp3,Atcay,Serinc5,Rab3gap2,Mon1b,Ttc12,Tctn1,Casp9,Tsku,Sik2,Dpyd,Gatad2a…	0.014
120	query_1	TRUE	0.0112496	7106	217	102	0.470046	0.0143541	TF:M03807	TF	Factor: SP2; motif: GNNGGGGGCGGGGSN	21700	3338	TF:M00000	TF,TF,TF,TF,TF,TF,TF,TF,TF,TF,TF,TF,TF,TF,TF,TF,TF,TF,TF,TF,TF,TF,TF,TF,TF,TF,TF,TF,TF,TF,TF,TF,TF,TF,TF,TF,TF,TF,TF,TF,TF,TF,TF,TF,TF,TF,TF,TF,TF,TF,TF,TF,TF,TF,TF,TF,TF,TF,TF,TF,TF,TF,TF,TF,TF,TF,TF,TF,TF,TF,TF,TF,TF,TF,TF,TF,TF,TF,TF,TF,TF,TF,TF,TF,TF,TF,TF,TF,TF,TF,TF,TF,TF,TF,TF,TF,TF,TF,TF,TF,TF,TF	Tmem74b,Fbxl16,Exoc6b,Ccdc6,Rsbn1l,Pigg,Pcdh10,Cacna1i,Farp1,Ro60,Gclm,Ddt,Nmt2,Dhcr7,Enpp1,Ap2a2,Lsp1,Pcgf2,Fas,Prkar2b,Ptpn11,Cd81,Por,Acvr1,Impdh1,Nek1,Pkm,Golga3,Acyp2,Tuba4a,Adcyap1r1,Nos3,Erf,Sms,Cacna1c,Prkcz,Dlk1,Dok7,Pip4p1,Arglu1,Slc25a31,Myo16,Lrrk2,Arcn1,Crhbp,Rai1,Abcg1,Ripor1,Arhgap23,Dusp23,Mtss2,Ranbp10,Fbxo11,Actn1,Pdk1,Ano10,Ptbp3,Atcay,Serinc5,Rab3gap2,Neto2,Ttc12,Tctn1,Casp9,S…	0.014
121	query_1	TRUE	0.0115185	8143	217	113	0.520737	0.013877	TF:M01783	TF	Factor: SP2; motif: GGGCGGGAC	21700	3334	TF:M00000	TF,TF,TF,TF,TF,TF,TF,TF,TF,TF,TF,TF,TF,TF,TF,TF,TF,TF,TF,TF,TF,TF,TF,TF,TF,TF,TF,TF,TF,TF,TF,TF,TF,TF,TF,TF,TF,TF,TF,TF,TF,TF,TF,TF,TF,TF,TF,TF,TF,TF,TF,TF,TF,TF,TF,TF,TF,TF,TF,TF,TF,TF,TF,TF,TF,TF,TF,TF,TF,TF,TF,TF,TF,TF,TF,TF,TF,TF,TF,TF,TF,TF,TF,TF,TF,TF,TF,TF,TF,TF,TF,TF,TF,TF,TF,TF,TF,TF,TF,TF,TF,TF,TF,TF,TF,TF,TF,TF,TF,TF,TF,TF,TF	Tmem74b,Exoc6b,Pcdh10,Nfxl1,Farp1,Ro60,Ntn1,Gclm,Kpna4,Pld3,Nmt2,Dhcr7,Enpp1,Tpi1,Pcgf2,Prkar2b,Ptpn11,Cd81,Por,Acvr1,Impdh1,Nek1,Pkm,Golga3,Opa1,Timm10,Prkacb,Tuba4a,Nos3,Erf,Sms,Prkcz,Anxa7,Dlk1,2300009A05Rik,Dok7,Pip4p1,Arglu1,Slc25a31,Arcn1,Rai1,Abcg1,Ripor1,Arhgap23,Dusp23,Mtss2,Myh14,Fbxo11,Actn1,Ano10,Ptbp3,Atcay,Serinc5,Slc9a7,Mon1b,Neto2,Pgghg,Ttc12,Tctn1,Casp9,Sik2,Dpyd,Gatad2a,Cmc2,Ang…	0.014
122	query_1	TRUE	0.0126476	14512	217	174	0.801843	0.0119901	TF:M10219	TF	Factor: Elk-1; motif: NCCGGAAGTGN	21700	932	TF:M00000	TF,TF,TF,TF,TF,TF,TF,TF,TF,TF,TF,TF,TF,TF,TF,TF,TF,TF,TF,TF,TF,TF,TF,TF,TF,TF,TF,TF,TF,TF,TF,TF,TF,TF,TF,TF,TF,TF,TF,TF,TF,TF,TF,TF,TF,TF,TF,TF,TF,TF,TF,TF,TF,TF,TF,TF,TF,TF,TF,TF,TF,TF,TF,TF,TF,TF,TF,TF,TF,TF,TF,TF,TF,TF,TF,TF,TF,TF,TF,TF,TF,TF,TF,TF,TF,TF,TF,TF,TF,TF,TF,TF,TF,TF,TF,TF,TF,TF,TF,TF,TF,TF,TF,TF,TF,TF,TF,TF,TF,TF,TF,TF,TF,TF,TF,TF,TF,TF,TF,TF,TF,TF,TF,TF,TF,TF,TF,TF,TF,TF,TF,TF,TF,…	Gm5938,Fbxl16,Exoc6b,Ccdc6,Rsbn1l,Pigg,Wdfy1,Nfxl1,Farp1,Ro60,Ntn1,Gclm,Ddt,Kpna4,Kpna6,Pld3,Cdk5r2,Nmt2,Dhcr7,Gosr1,Pomc,Mb,Enpp1,Cd44,Ap2a2,Tpi1,Lsp1,Pcgf2,Ndn,Fas,Kif5c,Ptpn6,Prkar2b,Ptpn11,Cd81,Por,Acvr1,Pkm,Tyro3,Golga3,Acyp2,Mrps21,Opa1,Gmeb2,Timm10,Prkacb,Tuba4a,Adcyap1r1,Nos3,Hnrnph2,Cdh10,Erf,Sms,Smad5,Cacna1c,Prkcz,Dlk1,2300009A05Rik,Dok7,Pip4p1,Tmem109,Spout1,Arglu1,Nr1d1,Gpr149,Slc25a…	0.012
123	query_1	TRUE	0.0139109	5424	217	83	0.382488	0.0153024	TF:M01598	TF	Factor: ZBED6; motif: NRRGCTCGCCNN	21700	3884	TF:M00000	TF,TF,TF,TF,TF,TF,TF,TF,TF,TF,TF,TF,TF,TF,TF,TF,TF,TF,TF,TF,TF,TF,TF,TF,TF,TF,TF,TF,TF,TF,TF,TF,TF,TF,TF,TF,TF,TF,TF,TF,TF,TF,TF,TF,TF,TF,TF,TF,TF,TF,TF,TF,TF,TF,TF,TF,TF,TF,TF,TF,TF,TF,TF,TF,TF,TF,TF,TF,TF,TF,TF,TF,TF,TF,TF,TF,TF,TF,TF,TF,TF,TF,TF	Tmem74b,Exoc6b,Nfxl1,Ro60,Ntn1,Kpna6,Cdk5r2,Dhcr7,Gosr1,Enpp1,Ptpn11,Por,Acvr1,Crkl,Impdh1,Gmeb2,Prkacb,Sms,Smad5,Cacna1c,Anxa7,Dok7,Tmem109,Prrc1,Klhdc2,Lrrk2,Grm4,Ripor1,Arhgap23,Isy1,Dusp23,Myh14,Ranbp10,Cyfip1,Fbxo11,Actn1,Bmp3,Slc9a7,Rab3gap2,Neto2,Armc6,Ttc12,Tctn1,Casp9,Tmt1a,Tsku,Sik2,Gatad2a,Pphln1,Znfx1,Ubac2,Gle1,Tcf25,Slco3a1,Tmx1,Chchd6,Cbr4,Dtnbp1,Srgap2,Sh3bp4,Neurl1a,Smc6,Atad3a,R…	0.015
124	query_1	TRUE	0.0144731	10749	217	139	0.640553	0.0129314	TF:M01660	TF	Factor: GABP-alpha; motif: CTTCCK	21700	1258	TF:M00000	TF,TF,TF,TF,TF,TF,TF,TF,TF,TF,TF,TF,TF,TF,TF,TF,TF,TF,TF,TF,TF,TF,TF,TF,TF,TF,TF,TF,TF,TF,TF,TF,TF,TF,TF,TF,TF,TF,TF,TF,TF,TF,TF,TF,TF,TF,TF,TF,TF,TF,TF,TF,TF,TF,TF,TF,TF,TF,TF,TF,TF,TF,TF,TF,TF,TF,TF,TF,TF,TF,TF,TF,TF,TF,TF,TF,TF,TF,TF,TF,TF,TF,TF,TF,TF,TF,TF,TF,TF,TF,TF,TF,TF,TF,TF,TF,TF,TF,TF,TF,TF,TF,TF,TF,TF,TF,TF,TF,TF,TF,TF,TF,TF,TF,TF,TF,TF,TF,TF,TF,TF,TF,TF,TF,TF,TF,TF,TF,TF,TF,TF,TF,TF,…	Fbxl16,Ccdc6,Rsbn1l,Pigg,Wdfy1,Nfxl1,Farp1,Ro60,Ntn1,Gclm,Ddt,Kpna4,Kpna6,Pld3,Cdk5r2,Nmt2,Dhcr7,Gosr1,Pomc,Enpp1,Cd44,Lsp1,Pcgf2,Ndn,Fas,Klkb1,Kif5c,Prkar2b,Ptpn11,Cd81,Por,Acvr1,Pkm,Tyro3,Golga3,Acyp2,Mrps21,Opa1,Gmeb2,Timm10,Prkacb,Adcyap1r1,Cdh10,Sms,Prkcz,Anxa7,Dlk1,Pip4p1,Tmem109,Spout1,Arglu1,Slc25a31,Samd5,Klhdc2,Arcn1,Rai1,Grm4,Ripor1,Isy1,Cyp4x1,Dusp23,Ranbp10,Cyfip1,Fbxo11,Actn1,Gtf2a2…	0.013
125	query_1	TRUE	0.0147783	7054	217	101	0.465438	0.0143181	TF:M00803_1	TF	Factor: E2F; motif: GGCGSG; match class: 1	21700	791	TF:M00803	TF,TF,TF,TF,TF,TF,TF,TF,TF,TF,TF,TF,TF,TF,TF,TF,TF,TF,TF,TF,TF,TF,TF,TF,TF,TF,TF,TF,TF,TF,TF,TF,TF,TF,TF,TF,TF,TF,TF,TF,TF,TF,TF,TF,TF,TF,TF,TF,TF,TF,TF,TF,TF,TF,TF,TF,TF,TF,TF,TF,TF,TF,TF,TF,TF,TF,TF,TF,TF,TF,TF,TF,TF,TF,TF,TF,TF,TF,TF,TF,TF,TF,TF,TF,TF,TF,TF,TF,TF,TF,TF,TF,TF,TF,TF,TF,TF,TF,TF,TF,TF	Tmem74b,Fbxl16,Ccdc6,Rsbn1l,Wdfy1,Cacna1i,Farp1,Gclm,Ddt,Kpna4,Cdk5r2,Nmt2,Got2,Enpp1,Ap2a2,Pcgf2,Prkar2b,Ptpn11,Cd81,Acvr1,Pkm,Gmeb2,Prkacb,Adcyap1r1,Erf,Sms,Smad5,Cacna1c,Dlk1,2300009A05Rik,Dok7,Pip4p1,2510002D24Rik,Arglu1,Prrc1,Slc25a31,Samd5,Klhdc2,Myo16,Lrrk2,Arcn1,Crhbp,Rai1,Grm4,Ripor1,Mtss2,Myh14,Fbxo11,Actn1,Fam210a,Ptbp3,Bmp3,Slc9a7,Neto2,Sik2,Gatad2a,Cmc2,Angel2,Pphln1,Znfx1,Tcf25,Rttn…	0.014
126	query_1	TRUE	0.016586	3107	217	55	0.253456	0.017702	TF:M07277_1	TF	Factor: BTEB2; motif: RGGGNGKGGN; match class: 1	21700	343	TF:M07277	TF,TF,TF,TF,TF,TF,TF,TF,TF,TF,TF,TF,TF,TF,TF,TF,TF,TF,TF,TF,TF,TF,TF,TF,TF,TF,TF,TF,TF,TF,TF,TF,TF,TF,TF,TF,TF,TF,TF,TF,TF,TF,TF,TF,TF,TF,TF,TF,TF,TF,TF,TF,TF,TF,TF	Tmem74b,Pcdh10,Farp1,Ro60,Ddt,Dhcr7,Enpp1,Ap2a2,Pcgf2,Fas,Acvr1,Impdh1,Nek1,Pkm,Erf,Cacna1c,Dok7,Pip4p1,Slc25a31,Myo16,Crhbp,Rai1,Abcg1,Ripor1,Dusp23,Mtss2,Ranbp10,Fbxo11,Actn1,Ano10,Ptbp3,Serinc5,Slc9a7,Tctn1,Casp9,Sik2,Dpyd,Gatad2a,Angel2,Ubac1,St3gal6,Dtnbp1,Sh3bp4,Ppp1r16a,Smc6,Gadd45gip1,Lage3,Chodl,Tomm34,Cmtm6,Slc23a2,Pfn2,Pnck,Morf4l2,Ehmt2	0.018
127	query_1	TRUE	0.0206041	4697	217	74	0.341014	0.0157547	TF:M01660_1	TF	Factor: GABP-alpha; motif: CTTCCK; match class: 1	21700	1259	TF:M01660	TF,TF,TF,TF,TF,TF,TF,TF,TF,TF,TF,TF,TF,TF,TF,TF,TF,TF,TF,TF,TF,TF,TF,TF,TF,TF,TF,TF,TF,TF,TF,TF,TF,TF,TF,TF,TF,TF,TF,TF,TF,TF,TF,TF,TF,TF,TF,TF,TF,TF,TF,TF,TF,TF,TF,TF,TF,TF,TF,TF,TF,TF,TF,TF,TF,TF,TF,TF,TF,TF,TF,TF,TF,TF	Rsbn1l,Farp1,Ddt,Kpna4,Pld3,Nmt2,Dhcr7,Pomc,Enpp1,Cd44,Lsp1,Pkm,Tyro3,Golga3,Mrps21,Gmeb2,Timm10,Prkacb,Sms,Prkcz,Arglu1,Klhdc2,Arcn1,Grm4,Isy1,Cyp4x1,Dusp23,Gtf2a2,Fam210a,Ano10,Bmp3,Mon1b,Tctn1,Tsku,Sik2,Aqr,Cmc2,Pphln1,Znfx1,Ubac2,Zc3h10,Gle1,2310022A10Rik,Rttn,Ubac1,Bloc1s4,Brk1,Dtnbp1,Prpf3,Ppp1r16a,Smc6,Plpp3,Stk24,Rnps1,Zdhhc6,Chmp3,Rpa3,Ears2,Tomm34,Wars2,Zcrb1,Tbcb,Borcs8,Appbp2,Crot,Slc…	0.016
128	query_1	TRUE	0.0221202	10412	217	135	0.62212	0.0129658	TF:M01993	TF	Factor: TEL1; motif: CNCGGAANNN	21700	3718	TF:M00000	TF,TF,TF,TF,TF,TF,TF,TF,TF,TF,TF,TF,TF,TF,TF,TF,TF,TF,TF,TF,TF,TF,TF,TF,TF,TF,TF,TF,TF,TF,TF,TF,TF,TF,TF,TF,TF,TF,TF,TF,TF,TF,TF,TF,TF,TF,TF,TF,TF,TF,TF,TF,TF,TF,TF,TF,TF,TF,TF,TF,TF,TF,TF,TF,TF,TF,TF,TF,TF,TF,TF,TF,TF,TF,TF,TF,TF,TF,TF,TF,TF,TF,TF,TF,TF,TF,TF,TF,TF,TF,TF,TF,TF,TF,TF,TF,TF,TF,TF,TF,TF,TF,TF,TF,TF,TF,TF,TF,TF,TF,TF,TF,TF,TF,TF,TF,TF,TF,TF,TF,TF,TF,TF,TF,TF,TF,TF,TF,TF,TF,TF,TF,TF,…	Tmem74b,Fbxl16,Ccdc6,Rsbn1l,Pigg,Pcdh10,Wdfy1,Cacna1i,Nfxl1,Ro60,Ntn1,Ddt,Kpna4,Pld3,Cdk5r2,Nmt2,Dhcr7,Gosr1,Pomc,Enpp1,Lsp1,Pcgf2,Ndn,Fas,Klkb1,Prkar2b,Por,Acvr1,Crkl,Impdh1,Nek1,Pkm,Tyro3,Golga3,Acyp2,Mrps21,Gmeb2,Timm10,Prkacb,Adcyap1r1,Hnrnph2,Sms,Prkcz,Dlk1,2300009A05Rik,Pip4p1,Spout1,Arglu1,Prrc1,Samd5,Klhdc2,Myo16,Arcn1,Crhbp,Rai1,Grm4,Ripor1,Isy1,Cyp4x1,Dusp23,Cyfip1,Actn1,Gtf2a2,Pdk1,Fam…	0.013
129	query_1	TRUE	0.029846	4152	217	67	0.308756	0.0161368	TF:M07250_1	TF	Factor: E2F-1; motif: NNNSSCGCSAANN; match class: 1	21700	753	TF:M07250	TF,TF,TF,TF,TF,TF,TF,TF,TF,TF,TF,TF,TF,TF,TF,TF,TF,TF,TF,TF,TF,TF,TF,TF,TF,TF,TF,TF,TF,TF,TF,TF,TF,TF,TF,TF,TF,TF,TF,TF,TF,TF,TF,TF,TF,TF,TF,TF,TF,TF,TF,TF,TF,TF,TF,TF,TF,TF,TF,TF,TF,TF,TF,TF,TF,TF,TF	Fbxl16,Ccdc6,Rsbn1l,Cacna1i,Nfxl1,Gclm,Kpna6,Pld3,Nmt2,Ap2a2,Pcgf2,Kif5c,Prkar2b,Cd81,Gmeb2,Prkacb,Hnrnph2,Erf,Cacna1c,Arglu1,Klhdc2,Rai1,Grm4,Ripor1,Mtss2,Fbxo11,Actn1,Ptbp3,Serinc5,Slc9a7,Neto2,Armc6,Pgghg,Casp9,Pphln1,Znfx1,Ubac2,2310022A10Rik,Rttn,St3gal6,Dtnbp1,Srgap2,Sh3bp4,Gmppa,Neurl1a,Smc6,Atad3a,Stk24,Rnps1,Zdhhc6,Rpa3,Ears2,Tomm34,Zcrb1,Atp5f1d,Dennd6b,Appbp2,Crot,Slc23a2,Map3k20,Stk4,…	0.016
130	query_1	TRUE	0.0312531	2550	217	47	0.21659	0.0184314	TF:M03893_1	TF	Factor: WT1; motif: GNGGGGGCGGGG; match class: 1	21700	3853	TF:M03893	TF,TF,TF,TF,TF,TF,TF,TF,TF,TF,TF,TF,TF,TF,TF,TF,TF,TF,TF,TF,TF,TF,TF,TF,TF,TF,TF,TF,TF,TF,TF,TF,TF,TF,TF,TF,TF,TF,TF,TF,TF,TF,TF,TF,TF,TF,TF	Ccdc6,Rsbn1l,Cacna1i,Ntn1,Nmt2,Ap2a2,Fas,Prkar2b,Ptpn11,Acvr1,Nek1,Erf,Sms,Dok7,Arglu1,Slc25a31,Rai1,Abcg1,Arhgap23,Dusp23,Ranbp10,Fbxo11,Pdk1,Ptbp3,Atcay,Slc9a7,Ttc12,Sik2,Gatad2a,Tcf25,Sh3bp4,Neurl1a,Smc6,Rnps1,Fmc1,Ears2,Tomm34,Cmtm6,Tbcb,Efhd1,Slc23a2,Pfn2,Pnck,Plod1,Morf4l2,Ehmt2,Bnip3l	0.018
131	query_1	TRUE	0.0316922	6163	217	90	0.414747	0.0146033	TF:M02039	TF	Factor: GABPalpha; motif: ACCGGAARYN	21700	1254	TF:M00000	TF,TF,TF,TF,TF,TF,TF,TF,TF,TF,TF,TF,TF,TF,TF,TF,TF,TF,TF,TF,TF,TF,TF,TF,TF,TF,TF,TF,TF,TF,TF,TF,TF,TF,TF,TF,TF,TF,TF,TF,TF,TF,TF,TF,TF,TF,TF,TF,TF,TF,TF,TF,TF,TF,TF,TF,TF,TF,TF,TF,TF,TF,TF,TF,TF,TF,TF,TF,TF,TF,TF,TF,TF,TF,TF,TF,TF,TF,TF,TF,TF,TF,TF,TF,TF,TF,TF,TF,TF,TF	Tmem74b,Pigg,Wdfy1,Farp1,Pld3,Cdk5r2,Dhcr7,Enpp1,Cd44,Ap2a2,Lsp1,Prkar2b,Ptpn11,Nek1,Golga3,Acyp2,Mrps21,Gmeb2,Timm10,Prkacb,Tuba4a,Adcyap1r1,Cdh10,Sms,Dlk1,2300009A05Rik,Tmem109,Arglu1,Slc25a31,Samd5,Klhdc2,Arcn1,Crhbp,Rai1,Grm4,Isy1,Dusp23,Cyfip1,Gtf2a2,Fam210a,Ano10,Ptbp3,Rab3gap2,Mon1b,Neto2,Casp9,Tmt1a,Sik2,Aqr,Gatad2a,Pphln1,Znfx1,Ubac2,Zc3h10,Gle1,2310022A10Rik,Rttn,Tmx1,Gtf2h3,Ubac1,Psmd2…	0.015
132	query_1	TRUE	0.0340931	4085	217	66	0.304147	0.0161567	TF:M00025_1	TF	Factor: Elk-1; motif: NNNNCCGGAARTNN; match class: 1	21700	925	TF:M00025	TF,TF,TF,TF,TF,TF,TF,TF,TF,TF,TF,TF,TF,TF,TF,TF,TF,TF,TF,TF,TF,TF,TF,TF,TF,TF,TF,TF,TF,TF,TF,TF,TF,TF,TF,TF,TF,TF,TF,TF,TF,TF,TF,TF,TF,TF,TF,TF,TF,TF,TF,TF,TF,TF,TF,TF,TF,TF,TF,TF,TF,TF,TF,TF,TF,TF	Wdfy1,Farp1,Ro60,Pld3,Dhcr7,Enpp1,Cd44,Ap2a2,Kif5c,Prkar2b,Tyro3,Golga3,Mrps21,Timm10,Prkacb,Sms,Tmem109,Spout1,Klhdc2,Arcn1,Rai1,Grm4,Isy1,Dusp23,Gtf2a2,Fam210a,Ano10,Ptbp3,Serinc5,Mon1b,Sik2,Aqr,Gatad2a,Znfx1,Ubac2,Zc3h10,2310022A10Rik,Rttn,Ubac1,Bloc1s4,Chchd6,Brk1,Prpf3,Ppp1r16a,Smc6,Rnps1,Zdhhc6,Chmp3,Rpa3,Ears2,Tomm34,Wars2,Cmtm6,Tbcb,Naa38,Mrpl19,Borcs8,Crot,Moap1,Stk4,Nqo2,Selenok,Ulk2,Cc…	0.016
133	query_1	TRUE	0.0365493	9200	217	122	0.562212	0.0132609	TF:M07261	TF	Factor: LKLF; motif: GGGGTGGKSN	21700	1964	TF:M00000	TF,TF,TF,TF,TF,TF,TF,TF,TF,TF,TF,TF,TF,TF,TF,TF,TF,TF,TF,TF,TF,TF,TF,TF,TF,TF,TF,TF,TF,TF,TF,TF,TF,TF,TF,TF,TF,TF,TF,TF,TF,TF,TF,TF,TF,TF,TF,TF,TF,TF,TF,TF,TF,TF,TF,TF,TF,TF,TF,TF,TF,TF,TF,TF,TF,TF,TF,TF,TF,TF,TF,TF,TF,TF,TF,TF,TF,TF,TF,TF,TF,TF,TF,TF,TF,TF,TF,TF,TF,TF,TF,TF,TF,TF,TF,TF,TF,TF,TF,TF,TF,TF,TF,TF,TF,TF,TF,TF,TF,TF,TF,TF,TF,TF,TF,TF,TF,TF,TF,TF,TF,TF	Tmem74b,Fbxl16,Ccdc6,Rsbn1l,Pigg,Wdfy1,Cacna1i,Farp1,Ro60,Ntn1,Pld3,Cdk5r2,Nmt2,Dhcr7,Gosr1,Mb,Got2,Klk1,Klk1b22,Tpi1,Pcgf2,Fas,Kif5c,Ptpn6,Prkar2b,Cd81,Por,Acvr1,Impdh1,Pkm,Acyp2,Gmeb2,Tuba4a,Adcyap1r1,Nos3,Cdh10,Erf,Smad5,Cacna1c,Dlk1,2300009A05Rik,Dok7,2510002D24Rik,Tmem109,Prrc1,Nr1d1,Gpr149,Samd5,Lrrk2,Crhbp,Rai1,Grm4,Ripor1,Dusp23,Ranbp10,Fbxo11,Actn1,Fam210a,Ano10,Ptbp3,Atcay,Bmp3,Dlgap2,S…	0.013
134	query_1	TRUE	0.0381101	9109	217	121	0.557604	0.0132836	TF:M10220	TF	Factor: SAP-1a; motif: NRRCCGGAAGYRN	21700	3078	TF:M00000	TF,TF,TF,TF,TF,TF,TF,TF,TF,TF,TF,TF,TF,TF,TF,TF,TF,TF,TF,TF,TF,TF,TF,TF,TF,TF,TF,TF,TF,TF,TF,TF,TF,TF,TF,TF,TF,TF,TF,TF,TF,TF,TF,TF,TF,TF,TF,TF,TF,TF,TF,TF,TF,TF,TF,TF,TF,TF,TF,TF,TF,TF,TF,TF,TF,TF,TF,TF,TF,TF,TF,TF,TF,TF,TF,TF,TF,TF,TF,TF,TF,TF,TF,TF,TF,TF,TF,TF,TF,TF,TF,TF,TF,TF,TF,TF,TF,TF,TF,TF,TF,TF,TF,TF,TF,TF,TF,TF,TF,TF,TF,TF,TF,TF,TF,TF,TF,TF,TF,TF,TF	Gm5938,Fbxl16,Ccdc6,Rsbn1l,Pigg,Wdfy1,Cacna1i,Nfxl1,Farp1,Ro60,Ntn1,Gclm,Ddt,Kpna4,Pld3,Cdk5r2,Nmt2,Dhcr7,Gosr1,Pomc,Enpp1,Pcgf2,Fas,Ptpn6,Ptpn11,Cd81,Acvr1,Impdh1,Tyro3,Golga3,Acyp2,Mrps21,Gmeb2,Timm10,Prkacb,Adcyap1r1,Cdh10,Erf,Sms,Prkcz,Dlk1,Pip4p1,Tmem109,Spout1,Arglu1,Slc25a31,Samd5,Klhdc2,Grm4,Ripor1,Isy1,Dusp23,Myh14,Ranbp10,Cyfip1,Fbxo11,Actn1,Gtf2a2,Fam210a,Ano10,Ptbp3,Atcay,Bmp3,Serinc5…	0.013
135	query_1	TRUE	0.0386727	2961	217	52	0.239631	0.0175616	TF:M03807_1	TF	Factor: SP2; motif: GNNGGGGGCGGGGSN; match class: 1	21700	3339	TF:M03807	TF,TF,TF,TF,TF,TF,TF,TF,TF,TF,TF,TF,TF,TF,TF,TF,TF,TF,TF,TF,TF,TF,TF,TF,TF,TF,TF,TF,TF,TF,TF,TF,TF,TF,TF,TF,TF,TF,TF,TF,TF,TF,TF,TF,TF,TF,TF,TF,TF,TF,TF,TF	Tmem74b,Fbxl16,Cacna1i,Farp1,Ro60,Nmt2,Dhcr7,Enpp1,Ap2a2,Fas,Ptpn11,Cd81,Por,Acvr1,Impdh1,Nek1,Dok7,Pip4p1,Slc25a31,Myo16,Rai1,Abcg1,Ripor1,Dusp23,Fbxo11,Actn1,Ano10,Ptbp3,Serinc5,Neto2,Tctn1,Casp9,Sik2,Dpyd,Gatad2a,Cmc2,Ubac1,Dtnbp1,Sh3bp4,Ppp1r16a,Smc6,Stk24,Gadd45gip1,Lage3,Tomm34,Cmtm6,Tbcb,Efhd1,Pfn2,Morf4l2,Ehmt2,Bnip3l	0.018
136	query_1	TRUE	0.0390654	2805	217	50	0.230415	0.0178253	TF:M05494_1	TF	Factor: Egr-2; motif: GCGTGGGCGG; match class: 1	21700	859	TF:M05494	TF,TF,TF,TF,TF,TF,TF,TF,TF,TF,TF,TF,TF,TF,TF,TF,TF,TF,TF,TF,TF,TF,TF,TF,TF,TF,TF,TF,TF,TF,TF,TF,TF,TF,TF,TF,TF,TF,TF,TF,TF,TF,TF,TF,TF,TF,TF,TF,TF,TF	Tmem74b,Ccdc6,Cacna1i,Gclm,Cdk5r2,Nmt2,Got2,Enpp1,Pcgf2,Prkar2b,Ptpn11,Por,Acvr1,Gmeb2,Erf,Sms,Dlk1,Dok7,Abcg1,Dusp23,Ranbp10,Fbxo11,Actn1,Ano10,Ptbp3,Tsku,Sik2,Gatad2a,Angel2,Znfx1,Zc3h10,Tcf25,Srgap2,Sh3bp4,Ppp1r16a,Neurl1a,Smc6,Stk24,Chmp3,Ears2,Slc23a2,Nrip3,Pfn2,Ulk2,Pnck,Plod1,Morf4l2,Smarcb1,Ehmt2,Bnip3l	0.018
137	query_1	TRUE	0.0401442	7960	217	109	0.502304	0.0136935	TF:M02023	TF	Factor: MAZ; motif: NKGGGAGGGGRGGR	21700	2076	TF:M00000	TF,TF,TF,TF,TF,TF,TF,TF,TF,TF,TF,TF,TF,TF,TF,TF,TF,TF,TF,TF,TF,TF,TF,TF,TF,TF,TF,TF,TF,TF,TF,TF,TF,TF,TF,TF,TF,TF,TF,TF,TF,TF,TF,TF,TF,TF,TF,TF,TF,TF,TF,TF,TF,TF,TF,TF,TF,TF,TF,TF,TF,TF,TF,TF,TF,TF,TF,TF,TF,TF,TF,TF,TF,TF,TF,TF,TF,TF,TF,TF,TF,TF,TF,TF,TF,TF,TF,TF,TF,TF,TF,TF,TF,TF,TF,TF,TF,TF,TF,TF,TF,TF,TF,TF,TF,TF,TF,TF,TF	Dhtkd1,Tmem74b,Fbxl16,Ccdc6,Rsbn1l,Cacna1i,Farp1,Ro60,Ddt,Kpna4,Pld3,Nmt2,Mb,Enpp1,Cd44,Klk1,Ap2a2,Tpi1,Pcgf2,Fas,Ptpn6,Cd81,Por,Acvr1,Nek1,Pkm,Golga3,Acyp2,Gmeb2,Timm10,Prkacb,Tuba4a,Hnrnph2,Cdh10,Erf,Smad5,Cacna1c,Prkcz,Dlk1,2510002D24Rik,Tmem109,Prrc1,Gpr149,Samd5,Klhdc2,Lrrk2,Crhbp,Rai1,Abcg1,Grm4,Ripor1,Arhgap23,Dusp23,Ranbp10,Fbxo11,Actn1,Atcay,Dlgap2,Slc9a7,Rab3gap2,Neto2,Pgghg,Gbp9,Ttc12,…	0.014
138	query_1	TRUE	0.0403348	19841	217	213	0.981567	0.0107353	TF:M01822_1	TF	Factor: CPBP; motif: SNCCCNN; match class: 1	21700	553	TF:M01822	TF,TF,TF,TF,TF,TF,TF,TF,TF,TF,TF,TF,TF,TF,TF,TF,TF,TF,TF,TF,TF,TF,TF,TF,TF,TF,TF,TF,TF,TF,TF,TF,TF,TF,TF,TF,TF,TF,TF,TF,TF,TF,TF,TF,TF,TF,TF,TF,TF,TF,TF,TF,TF,TF,TF,TF,TF,TF,TF,TF,TF,TF,TF,TF,TF,TF,TF,TF,TF,TF,TF,TF,TF,TF,TF,TF,TF,TF,TF,TF,TF,TF,TF,TF,TF,TF,TF,TF,TF,TF,TF,TF,TF,TF,TF,TF,TF,TF,TF,TF,TF,TF,TF,TF,TF,TF,TF,TF,TF,TF,TF,TF,TF,TF,TF,TF,TF,TF,TF,TF,TF,TF,TF,TF,TF,TF,TF,TF,TF,TF,TF,TF,TF,…	Dhtkd1,Tmem74b,Fbxl16,Exoc6b,Ccdc6,Rsbn1l,Pigg,Pcdh10,Wdfy1,Cacna1i,Nfxl1,Farp1,Ro60,Ntn1,Gclm,Ddt,Kpna4,Kpna6,Pld3,Cdk5r2,Nmt2,Dhcr7,Gosr1,Pomc,Mb,Got2,Enpp1,Cd44,Klk1,Klk1b22,Ap2a2,Tpi1,Lsp1,Pcgf2,Fas,Klkb1,Kif5c,Ptpn6,Prkar2b,Ptpn11,Cd81,Por,Acvr1,Crkl,Impdh1,Nek1,Pkm,Tyro3,Golga3,Acyp2,Mrps21,Opa1,Gmeb2,Timm10,Prkacb,Tuba4a,Adcyap1r1,Nos3,Hnrnph2,Cdh10,Erf,Sms,Smad5,Cacna1c,Prkcz,Anxa7,Dlk1,2…	0.011
139	query_1	TRUE	0.0411651	4277	217	68	0.313364	0.015899	TF:M01973	TF	Factor: PLAG1; motif: CCCCCKWNNNGGSCCC	21700	2786	TF:M00000	TF,TF,TF,TF,TF,TF,TF,TF,TF,TF,TF,TF,TF,TF,TF,TF,TF,TF,TF,TF,TF,TF,TF,TF,TF,TF,TF,TF,TF,TF,TF,TF,TF,TF,TF,TF,TF,TF,TF,TF,TF,TF,TF,TF,TF,TF,TF,TF,TF,TF,TF,TF,TF,TF,TF,TF,TF,TF,TF,TF,TF,TF,TF,TF,TF,TF,TF,TF	Tmem74b,Fbxl16,Wdfy1,Cacna1i,Ro60,Pld3,Dhcr7,Pomc,Mb,Cd44,Ap2a2,Tpi1,Lsp1,Pcgf2,Prkar2b,Acvr1,Impdh1,Prkacb,Adcyap1r1,Cacna1c,Prkcz,Dlk1,Dok7,Prrc1,Slc25a31,Crhbp,Rai1,Abcg1,Grm4,Arhgap23,Myh14,Fbxo11,Gtf2a2,Ptbp3,Atcay,Serinc5,Dlgap2,Neto2,Pgghg,Tsku,Sik2,Pphln1,Ablim1,Znfx1,Tcf25,2310022A10Rik,Dtnbp1,Sh3bp4,Gmppa,Plpp3,Stk24,Rnps1,Immp1l,Lage3,Ears2,Tomm34,Cmtm6,Zcrb1,Atp5f1d,Efhd1,Borcs8,Dennd…	0.016
140	query_1	TRUE	0.0413019	4362	217	69	0.317972	0.0158184	TF:M12470_1	TF	Factor: Foxn1; motif: RGAMGC; match class: 1	21700	1179	TF:M12470	TF,TF,TF,TF,TF,TF,TF,TF,TF,TF,TF,TF,TF,TF,TF,TF,TF,TF,TF,TF,TF,TF,TF,TF,TF,TF,TF,TF,TF,TF,TF,TF,TF,TF,TF,TF,TF,TF,TF,TF,TF,TF,TF,TF,TF,TF,TF,TF,TF,TF,TF,TF,TF,TF,TF,TF,TF,TF,TF,TF,TF,TF,TF,TF,TF,TF,TF,TF,TF	Fbxl16,Exoc6b,Ccdc6,Rsbn1l,Wdfy1,Nfxl1,Farp1,Ro60,Kpna6,Dhcr7,Pomc,Got2,Enpp1,Pcgf2,Fas,Kif5c,Prkar2b,Cd81,Por,Nek1,Acyp2,Prkacb,Adcyap1r1,Erf,Sms,Prkcz,Anxa7,Dlk1,Prrc1,Nr1d1,Myo16,Rai1,Mtss2,Cyfip1,Fbxo11,Ptbp3,Serinc5,Rab3gap2,Mon1b,Neto2,Armc6,Sik2,Cmc2,Znfx1,Slco3a1,Bloc1s4,Dtnbp1,Gorasp1,Srgap2,Med28,Ppp1r16a,Smc6,Plpp3,Stk24,Grpel1,Rnps1,Ears2,Mrps28,Tomm34,Mrpl19,Efhd1,Slc23a2,Syt13,Nqo2,…	0.016
141	query_1	TRUE	0.0434688	6574	217	94	0.43318	0.0142988	TF:M01241	TF	Factor: BEN; motif: CWGCGAYA	21700	288	TF:M00000	TF,TF,TF,TF,TF,TF,TF,TF,TF,TF,TF,TF,TF,TF,TF,TF,TF,TF,TF,TF,TF,TF,TF,TF,TF,TF,TF,TF,TF,TF,TF,TF,TF,TF,TF,TF,TF,TF,TF,TF,TF,TF,TF,TF,TF,TF,TF,TF,TF,TF,TF,TF,TF,TF,TF,TF,TF,TF,TF,TF,TF,TF,TF,TF,TF,TF,TF,TF,TF,TF,TF,TF,TF,TF,TF,TF,TF,TF,TF,TF,TF,TF,TF,TF,TF,TF,TF,TF,TF,TF,TF,TF,TF,TF	Ccdc6,Pcdh10,Cacna1i,Nfxl1,Farp1,Gclm,Ddt,Kpna4,Cdk5r2,Dhcr7,Pomc,Got2,Enpp1,Ap2a2,Pcgf2,Ptpn6,Por,Acvr1,Nek1,Pkm,Acyp2,Opa1,Adcyap1r1,Nos3,Smad5,Cacna1c,Prkcz,Dlk1,2300009A05Rik,Dok7,Spout1,Arglu1,Prrc1,Gpr149,Samd5,Klhdc2,Rai1,Ripor1,Ranbp10,Fbxo11,Pdk1,Ano10,Ptbp3,Atcay,Bmp3,Serinc5,Slc9a7,Srp68,Armc6,Ttc12,Gatad2a,Cmc2,Angel2,Pphln1,Ablim1,Aldh1l1,Znfx1,Ubac2,Gle1,Tcf25,Slco3a1,Ubac1,Psmd2,Bl…	0.014
142	query_1	TRUE	0.0445852	4372	217	69	0.317972	0.0157823	TF:M00932_1	TF	Factor: Sp1; motif: NNGGGGCGGGGNN; match class: 1	21700	3329	TF:M00932	TF,TF,TF,TF,TF,TF,TF,TF,TF,TF,TF,TF,TF,TF,TF,TF,TF,TF,TF,TF,TF,TF,TF,TF,TF,TF,TF,TF,TF,TF,TF,TF,TF,TF,TF,TF,TF,TF,TF,TF,TF,TF,TF,TF,TF,TF,TF,TF,TF,TF,TF,TF,TF,TF,TF,TF,TF,TF,TF,TF,TF,TF,TF,TF,TF,TF,TF,TF,TF	Tmem74b,Fbxl16,Exoc6b,Farp1,Ro60,Nmt2,Dhcr7,Enpp1,Ap2a2,Pcgf2,Fas,Ptpn11,Cd81,Acvr1,Impdh1,Nek1,Pkm,Tuba4a,Erf,Cacna1c,2300009A05Rik,Dok7,Pip4p1,Arglu1,Slc25a31,Myo16,Arcn1,Rai1,Abcg1,Ripor1,Arhgap23,Dusp23,Ranbp10,Fbxo11,Actn1,Ano10,Ptbp3,Serinc5,Slc9a7,Neto2,Ttc12,Tctn1,Casp9,Sik2,Dpyd,Gatad2a,Cmc2,Angel2,Znfx1,Tcf25,Ubac1,Dtnbp1,Sh3bp4,Ppp1r16a,Smc6,Stk24,Zdhhc6,Chmp3,Gadd45gip1,Lage3,Tomm34,C…	0.016
143	query_1	TRUE	0.0446788	8649	217	116	0.534562	0.013412	TF:M04157	TF	Factor: Tfap2a; motif: TGCCCYNRGGGCA	21700	3726	TF:M00000	TF,TF,TF,TF,TF,TF,TF,TF,TF,TF,TF,TF,TF,TF,TF,TF,TF,TF,TF,TF,TF,TF,TF,TF,TF,TF,TF,TF,TF,TF,TF,TF,TF,TF,TF,TF,TF,TF,TF,TF,TF,TF,TF,TF,TF,TF,TF,TF,TF,TF,TF,TF,TF,TF,TF,TF,TF,TF,TF,TF,TF,TF,TF,TF,TF,TF,TF,TF,TF,TF,TF,TF,TF,TF,TF,TF,TF,TF,TF,TF,TF,TF,TF,TF,TF,TF,TF,TF,TF,TF,TF,TF,TF,TF,TF,TF,TF,TF,TF,TF,TF,TF,TF,TF,TF,TF,TF,TF,TF,TF,TF,TF,TF,TF,TF,TF	Tmem74b,Rsbn1l,Wdfy1,Cacna1i,Nfxl1,Farp1,Ntn1,Ddt,Kpna4,Kpna6,Cdk5r2,Klk1,Klk1b22,Ap2a2,Tpi1,Kif5c,Ptpn6,Prkar2b,Cd81,Por,Acvr1,Impdh1,Pkm,Golga3,Opa1,Gmeb2,Prkacb,Tuba4a,Adcyap1r1,Nos3,Cdh10,Sms,Cacna1c,Prkcz,Dlk1,2300009A05Rik,Dok7,2510002D24Rik,Spout1,Prrc1,Nr1d1,Samd5,Klhdc2,Myo16,Lrrk2,Arcn1,Crhbp,Abcg1,Grm4,Arhgap23,Isy1,Mtss2,Myh14,Cyfip1,Fbxo11,Actn1,Pdk1,Fam210a,Ano10,Ptbp3,Serinc5,Slc9a…	0.013
144	query_1	TRUE	0.0450054	9531	217	125	0.576037	0.0131151	TF:M01752	TF	Factor: ERG; motif: ACCGGAART	21700	970	TF:M00000	TF,TF,TF,TF,TF,TF,TF,TF,TF,TF,TF,TF,TF,TF,TF,TF,TF,TF,TF,TF,TF,TF,TF,TF,TF,TF,TF,TF,TF,TF,TF,TF,TF,TF,TF,TF,TF,TF,TF,TF,TF,TF,TF,TF,TF,TF,TF,TF,TF,TF,TF,TF,TF,TF,TF,TF,TF,TF,TF,TF,TF,TF,TF,TF,TF,TF,TF,TF,TF,TF,TF,TF,TF,TF,TF,TF,TF,TF,TF,TF,TF,TF,TF,TF,TF,TF,TF,TF,TF,TF,TF,TF,TF,TF,TF,TF,TF,TF,TF,TF,TF,TF,TF,TF,TF,TF,TF,TF,TF,TF,TF,TF,TF,TF,TF,TF,TF,TF,TF,TF,TF,TF,TF,TF,TF	Ccdc6,Rsbn1l,Pigg,Wdfy1,Nfxl1,Farp1,Ro60,Pld3,Cdk5r2,Nmt2,Dhcr7,Gosr1,Mb,Enpp1,Cd44,Ap2a2,Lsp1,Pcgf2,Ndn,Fas,Kif5c,Ptpn11,Acvr1,Nek1,Tyro3,Golga3,Acyp2,Mrps21,Opa1,Gmeb2,Timm10,Prkacb,Tuba4a,Adcyap1r1,Cdh10,Erf,Sms,Dlk1,2300009A05Rik,Tmem109,Spout1,Arglu1,Slc25a31,Samd5,Klhdc2,Arcn1,Crhbp,Rai1,Grm4,Isy1,Dusp23,Cyfip1,Gtf2a2,Fam210a,Ano10,Ptbp3,Atcay,Serinc5,Rab3gap2,Mon1b,Neto2,Casp9,Tmt1a,Tsku,S…	0.013
145	query_1	TRUE	0.0470293	9737	217	127	0.585253	0.013043	TF:M12470	TF	Factor: Foxn1; motif: RGAMGC	21700	1178	TF:M00000	TF,TF,TF,TF,TF,TF,TF,TF,TF,TF,TF,TF,TF,TF,TF,TF,TF,TF,TF,TF,TF,TF,TF,TF,TF,TF,TF,TF,TF,TF,TF,TF,TF,TF,TF,TF,TF,TF,TF,TF,TF,TF,TF,TF,TF,TF,TF,TF,TF,TF,TF,TF,TF,TF,TF,TF,TF,TF,TF,TF,TF,TF,TF,TF,TF,TF,TF,TF,TF,TF,TF,TF,TF,TF,TF,TF,TF,TF,TF,TF,TF,TF,TF,TF,TF,TF,TF,TF,TF,TF,TF,TF,TF,TF,TF,TF,TF,TF,TF,TF,TF,TF,TF,TF,TF,TF,TF,TF,TF,TF,TF,TF,TF,TF,TF,TF,TF,TF,TF,TF,TF,TF,TF,TF,TF,TF,TF	Tmem74b,Fbxl16,Exoc6b,Ccdc6,Rsbn1l,Wdfy1,Cacna1i,Nfxl1,Farp1,Ro60,Ddt,Kpna4,Kpna6,Cdk5r2,Nmt2,Dhcr7,Pomc,Got2,Enpp1,Ap2a2,Pcgf2,Fas,Kif5c,Prkar2b,Cd81,Por,Acvr1,Crkl,Nek1,Pkm,Tyro3,Acyp2,Prkacb,Adcyap1r1,Nos3,Cdh10,Erf,Sms,Cacna1c,Prkcz,Anxa7,Dlk1,2300009A05Rik,Dok7,Pip4p1,Tmem109,Spout1,Prrc1,Nr1d1,Slc25a31,Samd5,Myo16,Rai1,Grm4,Ripor1,Arhgap23,Dusp23,Mtss2,Cyfip1,Fbxo11,Actn1,Gtf2a2,Ano10,Ptbp3…	0.013
146	query_1	TRUE	0.0472855	10950	217	139	0.640553	0.0126941	TF:M07289_1	TF	Factor: GKLF; motif: NNNRGGNGNGGSN; match class: 1	21700	1379	TF:M07289	TF,TF,TF,TF,TF,TF,TF,TF,TF,TF,TF,TF,TF,TF,TF,TF,TF,TF,TF,TF,TF,TF,TF,TF,TF,TF,TF,TF,TF,TF,TF,TF,TF,TF,TF,TF,TF,TF,TF,TF,TF,TF,TF,TF,TF,TF,TF,TF,TF,TF,TF,TF,TF,TF,TF,TF,TF,TF,TF,TF,TF,TF,TF,TF,TF,TF,TF,TF,TF,TF,TF,TF,TF,TF,TF,TF,TF,TF,TF,TF,TF,TF,TF,TF,TF,TF,TF,TF,TF,TF,TF,TF,TF,TF,TF,TF,TF,TF,TF,TF,TF,TF,TF,TF,TF,TF,TF,TF,TF,TF,TF,TF,TF,TF,TF,TF,TF,TF,TF,TF,TF,TF,TF,TF,TF,TF,TF,TF,TF,TF,TF,TF,TF,…	Tmem74b,Fbxl16,Exoc6b,Ccdc6,Rsbn1l,Pigg,Pcdh10,Wdfy1,Cacna1i,Farp1,Ro60,Ntn1,Gclm,Ddt,Kpna4,Cdk5r2,Nmt2,Dhcr7,Pomc,Mb,Cd44,Klk1,Klk1b22,Ap2a2,Tpi1,Lsp1,Pcgf2,Fas,Kif5c,Ptpn6,Prkar2b,Ptpn11,Cd81,Por,Acvr1,Impdh1,Pkm,Golga3,Acyp2,Mrps21,Gmeb2,Prkacb,Adcyap1r1,Nos3,Hnrnph2,Cdh10,Erf,Smad5,Cacna1c,Prkcz,Anxa7,Dlk1,Dok7,Tmem109,Spout1,Prrc1,Gpr149,Slc25a31,Samd5,Klhdc2,Myo16,Lrrk2,Crhbp,Rai1,Abcg1,Grm…	0.013
147	query_1	TRUE	0.0474269	3384	217	57	0.262673	0.016844	TF:M00008_1	TF	Factor: Sp1; motif: GGGGCGGGGT; match class: 1	21700	3319	TF:M00008	TF,TF,TF,TF,TF,TF,TF,TF,TF,TF,TF,TF,TF,TF,TF,TF,TF,TF,TF,TF,TF,TF,TF,TF,TF,TF,TF,TF,TF,TF,TF,TF,TF,TF,TF,TF,TF,TF,TF,TF,TF,TF,TF,TF,TF,TF,TF,TF,TF,TF,TF,TF,TF,TF,TF,TF,TF	Tmem74b,Fbxl16,Exoc6b,Ccdc6,Wdfy1,Farp1,Ro60,Ntn1,Kpna4,Kpna6,Nmt2,Dhcr7,Enpp1,Ap2a2,Tpi1,Kif5c,Acvr1,Nek1,Timm10,Tuba4a,2300009A05Rik,Pip4p1,Arglu1,Slc25a31,Rai1,Abcg1,Ripor1,Arhgap23,Ranbp10,Actn1,Pdk1,Ano10,Ptbp3,Atcay,Serinc5,Rab3gap2,Tctn1,Casp9,Sik2,Dpyd,Angel2,Aldh1l1,Ubac2,Ubac1,Dtnbp1,Sh3bp4,Smc6,Eps8l2,Stk24,Tomm34,Tbcb,Naa38,Ndufb8,Pfn2,Cln8,Plod1,Ehmt2	0.017
