# Supplementary material
Source: Research Square preprint supplement (doi:10.21203/rs.3.rs-8738572/v1)
Supplement: Supplementary file 6 [file ae798a73dde6ba4aac2e3d9e.xlsx]

## Sheet: Legends
Abbreviation	Description
WT_SCN	SCN from Wildtype
KI_SCN	SCN from SIK1 KI

## Sheet: Sheet Description
Sheet	Description
SCN Raw Counts	Raw counts for SCN Transcriptomics
SCN DESeq Results	Statistical analysis of SCN bulkRNA transcriptomics via DESeq
SCN GO	Functional analysis of SCN bulkRNA using GO profiler

## Sheet: SCN Raw Counts
	Geneid	WT1_SCN	WT2_SCN	WT3_SCN	KI1_SCN	KI2_SCN	KI3_SCN
1	ENSMUSG00000102693	0	0	0	0	0	0
2	ENSMUSG00000064842	0	0	0	0	0	0
3	ENSMUSG00000051951	755	726	223	373	528	572
4	ENSMUSG00000102851	0	0	0	0	0	0
5	ENSMUSG00000103377	0	0	0	3	0	1
6	ENSMUSG00000104017	0	0	1	0	6	0
7	ENSMUSG00000103025	0	1	0	0	2	0
8	ENSMUSG00000089699	0	0	0	0	0	0
9	ENSMUSG00000103201	1	0	0	0	1	0
10	ENSMUSG00000103147	1	0	1	0	0	0
11	ENSMUSG00000103161	2	2	0	1	0	2
12	ENSMUSG00000102331	7	8	0	4	6	2
13	ENSMUSG00000102348	7	21	4	5	0	16
14	ENSMUSG00000102592	0	0	0	0	0	0
15	ENSMUSG00000088333	0	0	0	0	0	0
16	ENSMUSG00000102343	0	0	0	0	0	0
17	ENSMUSG00000025900	26	6	6	22	15	18
18	ENSMUSG00000102948	0	0	0	0	0	0
19	ENSMUSG00000104123	0	0	0	0	0	0
20	ENSMUSG00000025902	37	25	8	29	49	28
21	ENSMUSG00000104238	0	0	0	0	0	0
22	ENSMUSG00000102269	1	2	1	0	3	0
23	ENSMUSG00000096126	0	0	0	0	0	0
24	ENSMUSG00000103003	0	0	0	0	0	0
25	ENSMUSG00000104328	5	1	0	0	2	0
26	ENSMUSG00000102735	0	0	0	0	0	0
27	ENSMUSG00000098104	15	10	5	13	13	7
28	ENSMUSG00000102175	0	0	2	0	0	0
29	ENSMUSG00000088000	0	0	0	0	1	0
30	ENSMUSG00000103265	1	0	0	0	0	0
31	ENSMUSG00000103922	8	10	1	2	4	5
32	ENSMUSG00000033845	403	428	109	211	418	500
33	ENSMUSG00000102275	9	14	4	1	9	0
34	ENSMUSG00000025903	283	313	103	158	297	284
35	ENSMUSG00000104217	0	0	0	0	0	0
36	ENSMUSG00000033813	973	1097	304	591	949	1036
37	ENSMUSG00000062588	17	26	5	10	24	23
38	ENSMUSG00000103280	50	25	1	29	30	34
39	ENSMUSG00000002459	288	297	105	189	303	300
40	ENSMUSG00000091305	0	1	0	4	0	0
41	ENSMUSG00000102653	1	1	3	0	1	0
42	ENSMUSG00000085623	0	4	0	1	0	4
43	ENSMUSG00000091665	0	1	0	0	1	2
44	ENSMUSG00000033793	2500	2421	639	1482	2499	2625
45	ENSMUSG00000104352	0	0	0	0	0	0
46	ENSMUSG00000104046	0	0	0	0	0	0
47	ENSMUSG00000102907	0	0	0	0	0	0
48	ENSMUSG00000025905	684	599	169	276	542	534
49	ENSMUSG00000103936	0	0	0	0	0	0
50	ENSMUSG00000093015	0	0	0	0	0	0
51	ENSMUSG00000103519	0	0	0	0	0	0
52	ENSMUSG00000033774	295	239	82	181	237	115
53	ENSMUSG00000103090	0	0	0	0	0	0
54	ENSMUSG00000025907	1946	1924	545	1014	1985	1873
55	ENSMUSG00000090031	94	86	27	63	90	109
56	ENSMUSG00000087247	0	1	0	0	0	0
57	ENSMUSG00000103355	0	0	0	0	1	0
58	ENSMUSG00000102706	0	0	0	0	0	0
59	ENSMUSG00000103845	84	61	4	24	49	65
60	ENSMUSG00000033740	340	312	81	161	230	258
61	ENSMUSG00000103329	10	24	5	8	19	6
62	ENSMUSG00000104385	0	0	0	0	0	0
63	ENSMUSG00000102135	9	6	0	5	5	4
64	ENSMUSG00000103282	0	0	0	0	0	0
65	ENSMUSG00000102534	0	0	0	0	0	0
66	ENSMUSG00000102213	0	1	0	0	0	0
67	ENSMUSG00000103629	0	0	0	0	0	0
68	ENSMUSG00000051285	1797	1708	478	897	1662	1616
69	ENSMUSG00000098201	0	0	0	0	2	0
70	ENSMUSG00000103509	134	137	34	45	126	88
71	ENSMUSG00000048538	22	31	9	18	33	47
72	ENSMUSG00000103709	0	0	0	0	0	0
73	ENSMUSG00000077244	0	0	0	0	0	0
74	ENSMUSG00000102768	0	0	0	0	0	0
75	ENSMUSG00000097797	22	18	1	16	4	18
76	ENSMUSG00000103498	0	0	0	0	0	0
77	ENSMUSG00000103067	0	0	0	0	0	0
78	ENSMUSG00000102320	0	0	0	0	0	0
79	ENSMUSG00000104226	0	0	0	0	0	0
80	ENSMUSG00000103903	0	0	0	0	0	0
81	ENSMUSG00000103557	0	0	0	0	0	0
82	ENSMUSG00000025909	433	447	135	267	440	464
83	ENSMUSG00000102647	3	0	1	3	1	6
84	ENSMUSG00000086235	2	0	0	0	0	0
85	ENSMUSG00000102253	0	0	0	1	0	1
86	ENSMUSG00000093970	1	0	0	0	0	0
87	ENSMUSG00000103884	0	1	0	0	0	0
88	ENSMUSG00000084353	2	0	0	0	0	0
89	ENSMUSG00000103933	0	0	0	0	3	0
90	ENSMUSG00000076135	0	0	0	0	0	0
91	ENSMUSG00000086195	0	0	0	0	0	0
92	ENSMUSG00000104504	0	0	0	0	0	0
93	ENSMUSG00000066693	0	0	0	0	0	0
94	ENSMUSG00000102316	0	0	0	0	0	2
95	ENSMUSG00000103819	0	0	0	1	1	0
96	ENSMUSG00000102871	1	0	0	0	0	0
97	ENSMUSG00000101571	0	0	0	0	1	0
98	ENSMUSG00000104428	0	0	0	0	0	0
99	ENSMUSG00000102272	0	2	0	0	0	0
100	ENSMUSG00000065625	0	0	0	0	0	0
101	ENSMUSG00000103411	2	2	0	0	2	0
102	ENSMUSG00000061024	428	341	115	211	362	440
103	ENSMUSG00000025911	391	357	77	224	382	338
104	ENSMUSG00000079671	19	9	0	9	12	9
105	ENSMUSG00000081441	7	1	3	9	6	9
106	ENSMUSG00000067879	579	485	148	258	562	460
107	ENSMUSG00000099827	0	0	0	0	0	0
108	ENSMUSG00000025912	131	114	17	53	148	144
109	ENSMUSG00000045210	1649	1648	501	703	1594	1565
110	ENSMUSG00000097893	0	1	1	2	5	4
111	ENSMUSG00000025915	160	150	36	79	130	109
112	ENSMUSG00000046334	0	4	1	2	3	1
113	ENSMUSG00000088916	0	0	0	0	0	0
114	ENSMUSG00000046101	72	43	23	33	45	69
115	ENSMUSG00000098234	84	91	19	39	68	84
116	ENSMUSG00000093178	5	0	0	2	0	0
117	ENSMUSG00000099032	15	16	4	12	8	21
118	ENSMUSG00000104025	0	0	0	0	0	0
119	ENSMUSG00000025916	14	8	6	3	4	9
120	ENSMUSG00000087199	0	1	0	0	0	0
121	ENSMUSG00000095780	3	0	0	0	0	0
122	ENSMUSG00000025917	1169	1102	316	669	1300	1261
123	ENSMUSG00000056763	1035	784	254	490	757	701
124	ENSMUSG00000102356	0	0	0	0	0	1
125	ENSMUSG00000067851	2345	2243	655	1104	2215	1984
126	ENSMUSG00000088153	5	3	0	0	0	3
127	ENSMUSG00000102556	0	0	0	0	0	0
128	ENSMUSG00000042501	7	8	0	9	8	17
129	ENSMUSG00000103810	2	0	0	0	0	0
130	ENSMUSG00000083422	0	0	0	0	0	0
131	ENSMUSG00000094979	0	0	0	0	0	0
132	ENSMUSG00000081417	0	0	0	0	0	0
133	ENSMUSG00000103448	0	0	0	0	0	0
134	ENSMUSG00000100212	0	1	0	0	1	0
135	ENSMUSG00000100648	0	0	0	0	0	0
136	ENSMUSG00000088585	1	0	0	0	0	0
137	ENSMUSG00000048960	1304	1312	309	671	1050	967
138	ENSMUSG00000077318	0	0	0	0	0	0
139	ENSMUSG00000101827	0	0	0	0	0	0
140	ENSMUSG00000103494	0	0	0	0	0	0
141	ENSMUSG00000057715	540	573	163	274	489	672
142	ENSMUSG00000103825	0	0	0	0	0	0
143	ENSMUSG00000099845	0	0	0	0	0	0
144	ENSMUSG00000103561	0	0	0	0	0	0
145	ENSMUSG00000101610	0	0	0	0	0	0
146	ENSMUSG00000093864	0	0	0	0	0	0
147	ENSMUSG00000098555	0	0	0	0	0	0
148	ENSMUSG00000097628	2	4	1	0	3	15
149	ENSMUSG00000098163	0	0	0	0	0	0
150	ENSMUSG00000097171	0	0	0	0	0	0
151	ENSMUSG00000101314	0	0	0	0	0	0
152	ENSMUSG00000016918	692	652	196	301	651	633
153	ENSMUSG00000025938	57	66	12	26	50	68
154	ENSMUSG00000104518	0	0	0	0	0	0
155	ENSMUSG00000069620	0	0	0	0	0	0
156	ENSMUSG00000099498	0	0	0	0	0	0
157	ENSMUSG00000042414	0	0	0	0	0	0
158	ENSMUSG00000005886	2893	2295	721	1374	2486	2194
159	ENSMUSG00000103506	3	8	2	0	1	2
160	ENSMUSG00000103495	0	0	0	0	2	0
161	ENSMUSG00000099183	0	0	0	0	0	0
162	ENSMUSG00000102639	0	0	0	1	0	4
163	ENSMUSG00000104170	1	1	0	0	4	2
164	ENSMUSG00000087782	1	1	0	2	0	0
165	ENSMUSG00000103085	4	4	0	2	5	0
166	ENSMUSG00000102664	8	9	0	7	4	5
167	ENSMUSG00000101476	3	4	0	2	0	5
168	ENSMUSG00000101171	3	0	0	0	0	0
169	ENSMUSG00000025935	856	815	228	523	819	846
170	ENSMUSG00000025937	435	369	102	237	365	340
171	ENSMUSG00000102982	2	8	0	2	7	1
172	ENSMUSG00000067813	0	0	0	1	0	0
173	ENSMUSG00000077368	0	0	0	0	0	0
174	ENSMUSG00000097711	0	0	0	2	0	0
175	ENSMUSG00000102166	0	0	0	0	0	0
176	ENSMUSG00000089358	0	0	0	0	0	0
177	ENSMUSG00000104209	0	0	0	0	0	0
178	ENSMUSG00000025932	56	75	11	24	74	75
179	ENSMUSG00000095853	0	0	0	1	0	0
180	ENSMUSG00000102588	0	0	0	0	0	0
181	ENSMUSG00000054493	16	19	1	1	8	15
182	ENSMUSG00000025930	27	10	2	6	17	15
183	ENSMUSG00000103492	5	6	1	3	5	4
184	ENSMUSG00000081201	7	7	4	6	12	10
185	ENSMUSG00000082193	8	4	2	1	5	7
186	ENSMUSG00000032769	16	19	5	7	6	20
187	ENSMUSG00000088159	0	0	0	0	0	0
188	ENSMUSG00000073737	40	59	12	41	70	66
189	ENSMUSG00000092083	551	626	149	223	430	395
190	ENSMUSG00000102937	0	0	0	0	1	0
191	ENSMUSG00000104149	1	2	2	3	2	0
192	ENSMUSG00000088829	0	3	0	0	0	0
193	ENSMUSG00000077377	0	0	0	0	1	0
194	ENSMUSG00000101652	0	0	0	0	0	0
195	ENSMUSG00000100814	0	0	0	0	0	0
196	ENSMUSG00000025925	268	213	56	128	177	195
197	ENSMUSG00000104379	16	9	5	7	14	19
198	ENSMUSG00000032719	14	10	1	6	2	7
199	ENSMUSG00000088943	0	0	0	0	0	0
200	ENSMUSG00000100652	0	0	0	0	0	0
201	ENSMUSG00000067795	47	18	6	22	38	21
202	ENSMUSG00000043716	3704	4068	949	2478	3965	4419
203	ENSMUSG00000025921	325	247	112	231	303	209
204	ENSMUSG00000104165	6	8	0	2	2	2
205	ENSMUSG00000100868	9	2	4	6	6	3
206	ENSMUSG00000025920	2312	2475	672	1351	2334	2632
207	ENSMUSG00000089982	3	4	0	0	8	1
208	ENSMUSG00000025939	667	703	172	368	726	659
209	ENSMUSG00000102457	1	5	0	4	0	1
210	ENSMUSG00000079658	991	1086	284	567	1042	1104
211	ENSMUSG00000097744	10	0	0	0	0	3
212	ENSMUSG00000100959	0	0	0	0	0	0
213	ENSMUSG00000025940	424	451	99	223	391	413
214	ENSMUSG00000025779	8	7	2	4	6	11
215	ENSMUSG00000100093	0	0	0	0	0	0
216	ENSMUSG00000091020	1	2	1	2	1	5
217	ENSMUSG00000101640	0	0	0	1	0	0
218	ENSMUSG00000104133	0	0	0	0	0	0
219	ENSMUSG00000042686	77	72	15	25	105	56
220	ENSMUSG00000100110	0	0	0	0	0	2
221	ENSMUSG00000025777	2929	2699	771	1490	2566	2839
222	ENSMUSG00000099899	2	3	0	0	2	4
223	ENSMUSG00000100272	0	0	0	0	0	0
224	ENSMUSG00000100398	0	1	0	0	2	0
225	ENSMUSG00000101589	5	11	11	13	7	21
226	ENSMUSG00000102048	0	0	0	0	0	0
227	ENSMUSG00000089534	0	0	0	0	0	0
228	ENSMUSG00000067780	100	35	23	69	78	58
229	ENSMUSG00000100053	10	6	2	8	6	2
230	ENSMUSG00000085125	11	9	2	6	7	7
231	ENSMUSG00000025776	48	25	6	17	31	49
232	ENSMUSG00000099895	0	2	0	1	0	1
233	ENSMUSG00000100554	0	0	0	0	1	0
234	ENSMUSG00000099473	1	0	0	0	0	0
235	ENSMUSG00000099591	1	3	0	0	1	2
236	ENSMUSG00000109887	22	35	6	12	26	41
237	ENSMUSG00000102001	0	0	0	0	0	0
238	ENSMUSG00000101717	0	0	0	0	0	0
239	ENSMUSG00000025774	0	0	0	0	0	0
240	ENSMUSG00000070977	0	0	0	0	0	0
241	ENSMUSG00000073735	0	0	0	1	0	0
242	ENSMUSG00000067773	0	0	0	0	0	0
243	ENSMUSG00000101685	0	0	0	0	0	0
244	ENSMUSG00000101306	0	0	0	0	0	0
245	ENSMUSG00000088800	0	0	0	0	0	0
246	ENSMUSG00000101644	0	0	0	0	0	0
247	ENSMUSG00000099433	0	0	0	0	0	0
248	ENSMUSG00000089787	1	0	0	0	0	0
249	ENSMUSG00000042596	0	0	0	0	0	0
250	ENSMUSG00000100720	1	2	1	10	1	6
251	ENSMUSG00000025927	0	1	0	1	8	1
252	ENSMUSG00000100538	0	0	0	0	0	0
253	ENSMUSG00000101117	0	0	0	0	0	0
254	ENSMUSG00000100204	0	1	3	2	3	4
255	ENSMUSG00000084668	0	0	0	0	0	0
256	ENSMUSG00000102597	0	0	0	0	0	0
257	ENSMUSG00000043760	0	0	0	0	0	0
258	ENSMUSG00000104095	0	0	0	0	0	0
259	ENSMUSG00000089914	0	0	0	0	0	0
260	ENSMUSG00000090142	0	0	0	0	0	0
261	ENSMUSG00000070175	0	0	0	0	0	0
262	ENSMUSG00000099906	0	0	0	0	0	0
263	ENSMUSG00000065559	0	0	0	0	0	0
264	ENSMUSG00000065480	0	0	0	0	0	0
265	ENSMUSG00000025929	0	0	0	0	0	0
266	ENSMUSG00000041872	4	0	0	0	0	0
267	ENSMUSG00000041859	48	40	16	33	38	51
268	ENSMUSG00000099714	0	0	0	0	0	0
269	ENSMUSG00000102121	0	0	0	0	0	0
270	ENSMUSG00000088858	0	0	0	0	0	0
271	ENSMUSG00000097934	25	14	5	9	18	25
272	ENSMUSG00000025931	4092	3580	926	1886	3717	3513
273	ENSMUSG00000077314	2	0	1	0	0	0
274	ENSMUSG00000100929	5	10	1	1	9	4
275	ENSMUSG00000041809	135	54	25	87	92	99
276	ENSMUSG00000041779	80	41	20	32	68	63
277	ENSMUSG00000099971	0	0	0	0	0	0
278	ENSMUSG00000100819	2	5	2	5	5	7
279	ENSMUSG00000025933	228	222	55	143	242	265
280	ENSMUSG00000102633	0	3	1	0	1	0
281	ENSMUSG00000025934	36	55	4	18	29	51
282	ENSMUSG00000099343	2	3	0	0	0	3
283	ENSMUSG00000096375	3	5	1	10	6	8
284	ENSMUSG00000025936	0	0	0	0	0	0
285	ENSMUSG00000093963	0	0	0	0	1	0
286	ENSMUSG00000067750	2	0	0	0	0	0
287	ENSMUSG00000086194	0	0	0	0	0	0
288	ENSMUSG00000094436	0	0	0	0	0	0
289	ENSMUSG00000041722	3	1	0	0	3	1
290	ENSMUSG00000085507	0	0	0	3	0	2
291	ENSMUSG00000094926	0	1	1	0	0	0
292	ENSMUSG00000085079	0	1	0	0	0	0
293	ENSMUSG00000085679	0	0	0	0	0	0
294	ENSMUSG00000028033	414	482	141	209	451	492
295	ENSMUSG00000104138	0	2	0	0	0	0
296	ENSMUSG00000082935	60	48	14	39	70	36
297	ENSMUSG00000103748	0	0	0	0	1	1
298	ENSMUSG00000099692	0	0	0	0	0	0
299	ENSMUSG00000100418	0	0	0	0	0	0
300	ENSMUSG00000041670	1970	1719	516	903	1771	1748
301	ENSMUSG00000097642	0	0	0	0	1	0
302	ENSMUSG00000101468	0	0	0	0	0	0
303	ENSMUSG00000101227	0	0	0	0	0	0
304	ENSMUSG00000073730	0	0	0	0	0	0
305	ENSMUSG00000089553	0	0	0	0	0	0
306	ENSMUSG00000102766	0	0	0	0	0	0
307	ENSMUSG00000065405	0	0	0	0	0	0
308	ENSMUSG00000097970	0	7	0	4	1	2
309	ENSMUSG00000065567	0	0	0	0	0	0
310	ENSMUSG00000100775	0	0	0	0	0	0
311	ENSMUSG00000101226	0	1	0	2	0	0
312	ENSMUSG00000026158	1729	1603	497	914	1428	1561
313	ENSMUSG00000097920	0	0	0	0	0	0
314	ENSMUSG00000099503	0	0	0	0	0	0
315	ENSMUSG00000026156	794	608	155	438	699	544
316	ENSMUSG00000026155	548	421	139	277	501	463
317	ENSMUSG00000026154	164	185	52	117	184	162
318	ENSMUSG00000102495	0	0	0	0	0	0
319	ENSMUSG00000026153	979	936	238	497	822	754
320	ENSMUSG00000102398	7	11	3	4	4	4
321	ENSMUSG00000097670	0	0	0	0	0	0
322	ENSMUSG00000026147	29	24	7	10	18	38
323	ENSMUSG00000026141	149	108	33	61	65	153
324	ENSMUSG00000077463	0	0	0	0	0	0
325	ENSMUSG00000099997	19	19	7	11	9	12
326	ENSMUSG00000100131	780	805	327	566	1471	1342
327	ENSMUSG00000067736	249	259	105	120	287	293
328	ENSMUSG00000101939	79	192	44	43	157	128
329	ENSMUSG00000101111	954	1646	355	569	1411	1178
330	ENSMUSG00000100862	1223	1321	637	788	2591	1694
331	ENSMUSG00000102070	1204	1496	462	799	1626	1684
332	ENSMUSG00000101249	1145	1214	318	730	1450	1706
333	ENSMUSG00000073725	3805	3415	945	1972	3444	3568
334	ENSMUSG00000100808	0	0	0	0	0	0
335	ENSMUSG00000100483	0	0	0	0	0	0
336	ENSMUSG00000100450	0	0	0	0	0	0
337	ENSMUSG00000099392	2	0	0	0	0	0
338	ENSMUSG00000033569	2203	2227	630	1172	2070	2167
339	ENSMUSG00000080849	0	0	0	0	0	0
340	ENSMUSG00000104257	0	3	0	0	3	0
341	ENSMUSG00000096866	1	0	0	0	0	0
342	ENSMUSG00000102296	4	0	0	0	2	0
343	ENSMUSG00000103209	0	2	0	1	0	0
344	ENSMUSG00000104027	1	8	0	4	1	1
345	ENSMUSG00000102407	1	2	0	0	1	0
346	ENSMUSG00000103214	2	7	0	0	5	0
347	ENSMUSG00000104100	4	3	0	0	5	1
348	ENSMUSG00000084740	0	0	0	0	0	0
349	ENSMUSG00000103889	0	1	1	0	1	0
350	ENSMUSG00000101301	0	1	0	0	0	0
351	ENSMUSG00000104221	2	7	0	0	5	0
352	ENSMUSG00000102250	2	4	0	4	2	0
353	ENSMUSG00000102317	4	1	1	3	6	0
354	ENSMUSG00000103563	1	5	0	1	6	1
355	ENSMUSG00000102465	16	9	10	2	12	0
356	ENSMUSG00000102659	0	6	0	0	7	8
357	ENSMUSG00000103924	1	4	0	0	5	0
358	ENSMUSG00000104132	3	4	1	4	11	2
359	ENSMUSG00000102747	3	1	0	1	7	3
360	ENSMUSG00000102386	2	10	0	0	3	3
361	ENSMUSG00000103004	1	0	0	0	0	0
362	ENSMUSG00000104516	22	15	7	17	26	29
363	ENSMUSG00000101618	0	0	0	0	0	0
364	ENSMUSG00000099458	0	0	0	0	0	0
365	ENSMUSG00000088111	0	0	0	0	0	0
366	ENSMUSG00000073722	0	0	0	0	0	0
367	ENSMUSG00000095256	0	0	0	0	0	0
368	ENSMUSG00000100310	0	0	0	0	0	0
369	ENSMUSG00000101514	0	0	0	0	2	0
370	ENSMUSG00000101033	0	0	0	0	0	0
371	ENSMUSG00000101372	0	0	0	0	0	0
372	ENSMUSG00000103241	0	0	0	0	0	0
373	ENSMUSG00000086240	14	16	5	11	19	6
374	ENSMUSG00000048411	0	0	0	0	0	0
375	ENSMUSG00000081557	0	0	0	0	0	0
376	ENSMUSG00000058590	0	0	0	0	0	0
377	ENSMUSG00000101235	0	0	0	0	0	0
378	ENSMUSG00000064433	0	0	0	0	0	0
379	ENSMUSG00000080625	0	0	0	0	0	0
380	ENSMUSG00000080391	0	0	0	0	0	0
381	ENSMUSG00000099257	0	0	0	0	0	0
382	ENSMUSG00000099492	5	2	2	3	7	10
383	ENSMUSG00000118548	0	0	0	0	0	0
384	ENSMUSG00000101726	0	0	0	0	0	0
385	ENSMUSG00000096829	0	0	0	0	0	0
386	ENSMUSG00000098883	0	0	0	0	0	0
387	ENSMUSG00000053185	1	5	0	0	0	0
388	ENSMUSG00000100261	6	14	20	10	7	7
389	ENSMUSG00000101180	0	0	0	0	0	0
390	ENSMUSG00000048874	2239	1888	620	1180	1912	2082
391	ENSMUSG00000103783	2	3	0	0	1	0
392	ENSMUSG00000104315	0	4	0	0	1	0
393	ENSMUSG00000026064	15	18	1	3	16	13
394	ENSMUSG00000117310	0	0	0	0	0	0
395	ENSMUSG00000117091	0	0	0	0	0	0
396	ENSMUSG00000086726	0	0	0	0	0	0
397	ENSMUSG00000086727	0	0	0	0	0	0
398	ENSMUSG00000100237	0	0	0	0	0	0
399	ENSMUSG00000098529	0	0	0	0	0	0
400	ENSMUSG00000100910	0	0	0	0	0	1
401	ENSMUSG00000099796	0	1	0	0	0	1
402	ENSMUSG00000050217	1	0	0	0	0	0
403	ENSMUSG00000026063	0	0	0	0	0	0
404	ENSMUSG00000077664	0	0	0	0	0	0
405	ENSMUSG00000100205	0	0	0	0	0	0
406	ENSMUSG00000100592	0	0	0	0	0	0
407	ENSMUSG00000094215	0	0	0	0	0	0
408	ENSMUSG00000101093	0	0	0	0	0	0
409	ENSMUSG00000070960	12	18	13	16	35	22
410	ENSMUSG00000088620	0	0	0	0	0	0
411	ENSMUSG00000082159	0	0	0	0	0	0
412	ENSMUSG00000026058	311	287	95	167	338	374
413	ENSMUSG00000064688	0	0	0	0	0	0
414	ENSMUSG00000103482	3	5	1	0	13	0
415	ENSMUSG00000104498	0	2	0	0	2	0
416	ENSMUSG00000104313	0	0	0	4	4	0
417	ENSMUSG00000102865	6	3	0	2	3	6
418	ENSMUSG00000102321	0	3	5	1	3	0
419	ENSMUSG00000091318	9	8	2	3	7	5
420	ENSMUSG00000089489	0	0	0	0	0	0
421	ENSMUSG00000104433	7	7	6	4	17	3
422	ENSMUSG00000089395	0	0	0	0	1	1
423	ENSMUSG00000102926	0	0	0	0	0	0
424	ENSMUSG00000100497	0	0	0	0	0	0
425	ENSMUSG00000102917	2	1	0	0	0	2
426	ENSMUSG00000100481	7	4	5	3	8	8
427	ENSMUSG00000100590	0	0	0	2	0	1
428	ENSMUSG00000088750	0	0	0	0	0	0
429	ENSMUSG00000104230	0	0	0	0	0	0
430	ENSMUSG00000101754	0	0	0	0	0	0
431	ENSMUSG00000065223	0	0	0	1	0	0
432	ENSMUSG00000100318	0	0	0	0	0	0
433	ENSMUSG00000101612	0	0	0	0	0	0
434	ENSMUSG00000065260	0	0	0	0	0	0
435	ENSMUSG00000026134	147	116	41	96	150	140
436	ENSMUSG00000101682	0	0	0	0	0	0
437	ENSMUSG00000102714	0	2	0	0	1	0
438	ENSMUSG00000102093	0	0	0	0	0	0
439	ENSMUSG00000103746	3	2	3	14	5	4
440	ENSMUSG00000102198	3	3	0	0	4	1
441	ENSMUSG00000004768	868	614	194	461	619	749
442	ENSMUSG00000042215	215	168	61	131	191	195
443	ENSMUSG00000103072	5	0	1	0	0	0
444	ENSMUSG00000042197	1462	1419	423	791	1365	1321
445	ENSMUSG00000081402	2	3	0	1	8	1
446	ENSMUSG00000042182	2636	3020	836	1415	2870	3540
447	ENSMUSG00000104416	44	17	14	28	27	28
448	ENSMUSG00000026131	17260	15166	4714	8651	14393	15020
449	ENSMUSG00000103596	0	1	0	0	1	0
450	ENSMUSG00000099382	0	0	0	0	0	0
451	ENSMUSG00000084506	0	0	0	0	0	0
452	ENSMUSG00000103364	0	5	1	7	2	2
453	ENSMUSG00000105982	0	0	0	0	0	0
454	ENSMUSG00000096992	14	10	0	6	7	3
455	ENSMUSG00000103001	0	1	0	0	3	0
456	ENSMUSG00000104397	0	0	0	0	0	0
457	ENSMUSG00000102839	1	1	0	0	0	0
458	ENSMUSG00000101206	0	0	0	0	1	0
459	ENSMUSG00000101462	6	2	3	8	8	5
460	ENSMUSG00000102336	46	54	6	19	30	19
461	ENSMUSG00000092852	0	0	0	0	0	0
462	ENSMUSG00000042111	303	273	130	197	248	329
463	ENSMUSG00000101711	0	0	0	0	4	0
464	ENSMUSG00000026127	618	614	159	357	600	645
465	ENSMUSG00000026126	10	14	6	7	6	22
466	ENSMUSG00000100280	9	1	4	3	0	2
467	ENSMUSG00000101223	1	1	0	1	3	0
468	ENSMUSG00000026125	0	0	0	0	0	0
469	ENSMUSG00000101116	0	0	0	0	0	0
470	ENSMUSG00000026124	0	1	0	0	0	0
471	ENSMUSG00000101803	0	0	0	0	0	0
472	ENSMUSG00000037529	0	0	0	0	0	0
473	ENSMUSG00000045815	0	0	0	0	1	1
474	ENSMUSG00000045174	669	665	242	467	734	879
475	ENSMUSG00000100524	0	0	0	0	0	0
476	ENSMUSG00000102499	0	0	0	0	0	5
477	ENSMUSG00000103521	0	0	0	0	0	6
478	ENSMUSG00000104098	1	0	0	0	0	0
479	ENSMUSG00000037509	3238	2907	944	1898	3108	3220
480	ENSMUSG00000102537	0	0	0	0	0	0
481	ENSMUSG00000102612	0	0	0	0	0	0
482	ENSMUSG00000118272	0	0	0	0	0	0
483	ENSMUSG00000104002	40	24	8	22	16	56
484	ENSMUSG00000037503	4858	4775	1252	2694	4692	4873
485	ENSMUSG00000104358	41	76	20	13	35	39
486	ENSMUSG00000026123	8342	8012	2337	4754	8337	8624
487	ENSMUSG00000103716	0	0	0	0	0	0
488	ENSMUSG00000103548	0	4	0	0	0	6
489	ENSMUSG00000103760	0	0	0	0	0	0
490	ENSMUSG00000103997	0	0	0	0	0	0
491	ENSMUSG00000077231	0	0	0	0	0	0
492	ENSMUSG00000104417	0	0	0	0	0	0
493	ENSMUSG00000064601	0	0	0	0	0	0
494	ENSMUSG00000101714	0	0	0	0	0	0
495	ENSMUSG00000102531	0	0	0	0	0	7
496	ENSMUSG00000103096	0	0	0	0	0	0
497	ENSMUSG00000102279	0	0	0	0	0	0
498	ENSMUSG00000103708	0	0	0	0	0	0
499	ENSMUSG00000104201	0	0	0	0	0	0
500	ENSMUSG00000102434	0	0	0	0	0	0
501	ENSMUSG00000045216	1161	918	248	550	978	845
502	ENSMUSG00000104523	0	0	0	0	0	0
503	ENSMUSG00000102202	8	5	3	0	5	7
504	ENSMUSG00000037470	1727	1518	420	756	1393	1465
505	ENSMUSG00000098752	0	0	0	0	0	0
506	ENSMUSG00000047180	30	17	5	18	16	27
507	ENSMUSG00000037447	185	147	32	108	185	178
508	ENSMUSG00000102762	5	3	0	2	1	2
509	ENSMUSG00000010453	3123	2779	806	1692	2891	2841
510	ENSMUSG00000098680	0	0	0	0	0	0
511	ENSMUSG00000037432	222	220	73	146	197	237
512	ENSMUSG00000001143	1090	1075	285	630	961	944
513	ENSMUSG00000037408	207	268	80	203	232	227
514	ENSMUSG00000104316	0	0	0	2	2	0
515	ENSMUSG00000106081	0	0	0	0	0	0
516	ENSMUSG00000001138	1069	863	231	558	901	919
517	ENSMUSG00000102845	0	0	0	0	0	0
518	ENSMUSG00000067653	40	12	7	15	23	25
519	ENSMUSG00000109510	0	0	0	0	0	0
520	ENSMUSG00000079610	262	210	69	165	242	241
521	ENSMUSG00000026121	411	294	79	175	291	277
522	ENSMUSG00000087589	15	21	11	14	10	16
523	ENSMUSG00000046337	1	1	1	0	3	1
524	ENSMUSG00000089906	0	0	0	0	0	0
525	ENSMUSG00000077939	0	0	0	0	0	0
526	ENSMUSG00000061518	1702	1772	525	994	1799	2162
527	ENSMUSG00000037351	4584	4330	1375	2498	4251	4483
528	ENSMUSG00000102416	49	59	18	28	39	33
529	ENSMUSG00000104237	136	96	35	39	59	107
530	ENSMUSG00000026117	70	60	19	76	49	106
531	ENSMUSG00000097291	5	0	0	2	5	1
532	ENSMUSG00000026116	2992	2380	788	1460	2452	2414
533	ENSMUSG00000103016	0	0	0	0	0	0
534	ENSMUSG00000102930	0	3	0	0	2	0
535	ENSMUSG00000103159	2	6	0	0	1	0
536	ENSMUSG00000080054	1	0	0	0	2	0
537	ENSMUSG00000095944	0	0	0	0	0	0
538	ENSMUSG00000050122	143	53	29	107	88	89
539	ENSMUSG00000103603	9	4	2	3	6	17
540	ENSMUSG00000026114	112	57	41	63	78	92
541	ENSMUSG00000102231	0	0	0	0	0	0
542	ENSMUSG00000026113	3053	3106	858	1782	2636	2683
543	ENSMUSG00000086064	0	0	0	1	0	0
544	ENSMUSG00000102879	0	0	0	0	0	0
545	ENSMUSG00000026112	1732	1663	490	883	1643	1820
546	ENSMUSG00000026111	501	539	131	308	573	610
547	ENSMUSG00000026110	1300	1197	342	666	1063	1225
548	ENSMUSG00000103948	1	0	0	0	4	0
549	ENSMUSG00000087233	0	0	0	0	0	0
550	ENSMUSG00000026090	861	776	219	523	749	1002
551	ENSMUSG00000089767	3	5	5	6	17	1
552	ENSMUSG00000104365	0	0	0	0	1	0
553	ENSMUSG00000102650	1	0	0	1	0	0
554	ENSMUSG00000060771	343	273	91	209	357	244
555	ENSMUSG00000097268	40	62	23	11	52	66
556	ENSMUSG00000037216	59	64	21	63	66	74
557	ENSMUSG00000026088	123	121	37	86	103	117
558	ENSMUSG00000026087	574	684	157	377	647	652
559	ENSMUSG00000061584	45	26	6	28	37	15
560	ENSMUSG00000087374	0	0	0	0	0	1
561	ENSMUSG00000026085	0	0	0	0	0	0
562	ENSMUSG00000089141	0	0	0	0	0	0
563	ENSMUSG00000058407	758	836	198	494	762	843
564	ENSMUSG00000026083	1820	1640	459	876	1607	1932
565	ENSMUSG00000026082	518	468	159	291	469	489
566	ENSMUSG00000103804	12	10	1	13	6	17
567	ENSMUSG00000102716	0	0	0	0	0	0
568	ENSMUSG00000037138	1336	1342	390	620	1120	1437
569	ENSMUSG00000085391	7	11	3	2	5	13
570	ENSMUSG00000085280	0	0	0	0	0	0
571	ENSMUSG00000087131	1	5	0	0	2	3
572	ENSMUSG00000102984	0	0	0	0	1	0
573	ENSMUSG00000102541	0	0	0	0	0	0
574	ENSMUSG00000103531	0	0	2	0	4	0
575	ENSMUSG00000048814	8299	8118	2569	4699	7897	8838
576	ENSMUSG00000026080	1733	1645	433	1013	1695	1763
577	ENSMUSG00000103647	2	0	0	0	2	0
578	ENSMUSG00000102447	0	0	0	0	0	0
579	ENSMUSG00000067604	342	365	48	95	458	124
580	ENSMUSG00000026078	552	540	167	307	550	722
581	ENSMUSG00000103046	79	41	13	42	43	43
582	ENSMUSG00000104188	0	0	0	0	0	0
583	ENSMUSG00000103182	1	0	0	0	0	0
584	ENSMUSG00000098833	0	0	0	0	0	0
585	ENSMUSG00000026077	331	232	87	180	254	255
586	ENSMUSG00000092553	0	0	0	0	0	1
587	ENSMUSG00000092563	0	0	0	0	0	0
588	ENSMUSG00000073702	2524	2825	751	1730	2911	3092
589	ENSMUSG00000003134	608	526	202	339	497	601
590	ENSMUSG00000102607	0	0	0	1	4	0
591	ENSMUSG00000065629	0	0	0	0	0	0
592	ENSMUSG00000104827	0	0	0	0	0	0
593	ENSMUSG00000003135	515	457	144	295	477	504
594	ENSMUSG00000085894	33	34	6	30	22	45
595	ENSMUSG00000077704	4	1	1	4	2	10
596	ENSMUSG00000048234	415	357	115	213	382	435
597	ENSMUSG00000064936	2	0	1	0	0	0
598	ENSMUSG00000102471	0	0	0	0	0	0
599	ENSMUSG00000050967	1826	1852	570	918	1706	1851
600	ENSMUSG00000097083	21	24	3	12	21	14
601	ENSMUSG00000057173	11	5	1	2	11	9
602	ENSMUSG00000091937	0	0	0	0	0	0
603	ENSMUSG00000101634	1	0	0	0	2	2
604	ENSMUSG00000026074	3191	2487	664	1676	2644	2256
605	ENSMUSG00000102985	32	41	8	20	15	18
606	ENSMUSG00000026073	17	14	6	6	6	15
607	ENSMUSG00000097899	30	29	12	12	15	14
608	ENSMUSG00000102975	0	0	0	0	0	0
609	ENSMUSG00000026072	55	53	18	45	44	62
610	ENSMUSG00000103560	0	0	0	0	1	0
611	ENSMUSG00000070942	16	12	6	7	8	14
612	ENSMUSG00000103230	2	0	1	0	0	5
613	ENSMUSG00000026069	1	4	0	0	10	2
614	ENSMUSG00000026070	0	0	0	0	0	0
615	ENSMUSG00000026068	2	4	0	0	1	0
616	ENSMUSG00000104441	0	0	0	0	0	0
617	ENSMUSG00000026065	0	0	0	0	0	0
618	ENSMUSG00000102676	0	0	0	0	0	0
619	ENSMUSG00000026062	74	66	20	49	66	81
620	ENSMUSG00000103679	0	0	0	0	0	0
621	ENSMUSG00000103270	2	2	0	0	0	2
622	ENSMUSG00000041945	26	32	9	26	20	32
623	ENSMUSG00000079588	7	3	3	4	3	5
624	ENSMUSG00000094136	0	0	0	0	0	0
625	ENSMUSG00000104072	0	0	0	0	0	0
626	ENSMUSG00000100185	0	0	0	0	0	0
627	ENSMUSG00000100832	1	0	0	0	0	0
628	ENSMUSG00000100178	0	0	0	0	0	0
629	ENSMUSG00000101877	0	0	0	0	0	0
630	ENSMUSG00000053640	0	1	0	0	0	0
631	ENSMUSG00000101919	0	0	0	0	0	0
632	ENSMUSG00000101299	4	3	2	0	0	0
633	ENSMUSG00000100180	0	0	0	0	0	0
634	ENSMUSG00000103106	0	0	0	0	0	0
635	ENSMUSG00000060424	101	74	20	46	59	95
636	ENSMUSG00000104199	0	4	0	0	0	0
637	ENSMUSG00000045515	547	580	127	298	525	546
638	ENSMUSG00000093436	4	7	7	3	14	19
639	ENSMUSG00000097063	28	27	8	14	27	32
640	ENSMUSG00000099784	5	4	3	6	2	7
641	ENSMUSG00000060679	604	495	139	290	544	538
642	ENSMUSG00000077448	0	0	0	0	0	0
643	ENSMUSG00000041907	356	323	95	186	296	410
644	ENSMUSG00000089088	0	0	0	0	0	0
645	ENSMUSG00000070939	1512	1407	407	877	1373	1330
646	ENSMUSG00000100269	0	1	1	0	0	1
647	ENSMUSG00000041878	9	14	1	4	11	7
648	ENSMUSG00000010290	1027	948	272	517	912	1078
649	ENSMUSG00000008136	55	81	13	37	95	97
650	ENSMUSG00000094497	1	0	1	0	3	0
651	ENSMUSG00000099576	0	0	0	0	0	0
652	ENSMUSG00000099694	0	0	0	0	0	0
653	ENSMUSG00000101923	0	0	0	0	0	0
654	ENSMUSG00000066877	462	336	111	287	375	377
655	ENSMUSG00000103422	0	0	1	0	0	0
656	ENSMUSG00000103945	19	7	5	5	13	1
657	ENSMUSG00000026051	28	0	5	9	6	7
658	ENSMUSG00000100764	2	0	2	2	5	1
659	ENSMUSG00000100635	2	3	0	4	2	0
660	ENSMUSG00000100480	5	12	3	3	8	7
661	ENSMUSG00000057363	583	543	165	297	531	631
662	ENSMUSG00000090243	2	0	0	0	0	0
663	ENSMUSG00000100701	8	5	2	1	10	11
664	ENSMUSG00000101395	0	0	0	0	0	0
665	ENSMUSG00000088848	0	0	0	0	0	0
666	ENSMUSG00000095757	0	0	0	0	0	0
667	ENSMUSG00000041763	1194	1204	331	600	1064	1241
668	ENSMUSG00000047343	11	9	4	2	5	2
669	ENSMUSG00000090106	0	0	0	0	0	0
670	ENSMUSG00000091844	1	2	0	2	0	3
671	ENSMUSG00000026049	32	38	8	19	19	39
672	ENSMUSG00000101104	0	0	0	0	0	0
673	ENSMUSG00000026047	200	137	39	109	187	144
674	ENSMUSG00000041684	513	474	153	242	485	536
675	ENSMUSG00000026048	691	575	176	348	606	576
676	ENSMUSG00000046828	0	0	0	0	0	2
677	ENSMUSG00000089703	1	0	0	0	0	3
678	ENSMUSG00000100966	0	0	0	0	0	0
679	ENSMUSG00000100769	0	0	0	0	0	0
680	ENSMUSG00000101567	4	7	3	3	6	5
681	ENSMUSG00000056870	121	83	27	61	90	80
682	ENSMUSG00000102319	0	0	1	0	1	0
683	ENSMUSG00000089877	0	0	0	0	0	0
684	ENSMUSG00000101701	0	0	0	0	0	0
685	ENSMUSG00000103071	0	5	0	0	0	0
686	ENSMUSG00000100434	0	0	0	0	0	0
687	ENSMUSG00000100013	0	0	0	0	0	0
688	ENSMUSG00000101251	0	0	0	0	0	0
689	ENSMUSG00000101937	0	0	0	0	0	0
690	ENSMUSG00000026043	27	27	2	1	11	20
691	ENSMUSG00000105211	0	0	0	0	0	0
692	ENSMUSG00000026042	235	191	19	102	144	93
693	ENSMUSG00000104476	0	0	0	0	0	0
694	ENSMUSG00000100218	0	0	0	0	0	0
695	ENSMUSG00000100361	0	0	0	0	0	0
696	ENSMUSG00000100894	0	0	0	0	0	0
697	ENSMUSG00000095121	0	0	0	0	0	0
698	ENSMUSG00000065255	0	0	0	0	0	0
699	ENSMUSG00000100843	2	0	0	0	6	0
700	ENSMUSG00000087764	0	0	0	0	0	0
701	ENSMUSG00000025995	604	570	203	333	513	717
702	ENSMUSG00000099850	0	0	0	0	0	0
703	ENSMUSG00000084817	21	15	6	26	27	30
704	ENSMUSG00000098549	0	0	0	0	0	0
705	ENSMUSG00000099381	0	0	0	0	0	4
706	ENSMUSG00000025993	111	114	28	73	105	134
707	ENSMUSG00000099946	0	0	0	0	0	0
708	ENSMUSG00000070896	0	0	0	0	0	0
709	ENSMUSG00000090682	0	0	0	0	0	2
710	ENSMUSG00000044457	0	0	0	0	0	0
711	ENSMUSG00000099432	0	0	0	0	1	0
712	ENSMUSG00000041144	782	667	144	368	498	439
713	ENSMUSG00000096047	0	0	0	0	0	0
714	ENSMUSG00000101262	0	0	0	0	0	0
715	ENSMUSG00000101337	162	162	36	86	131	99
716	ENSMUSG00000025986	2222	2105	611	1279	2185	2093
717	ENSMUSG00000100213	50	31	19	30	35	59
718	ENSMUSG00000103129	0	0	0	2	0	0
719	ENSMUSG00000100160	2	0	1	0	4	0
720	ENSMUSG00000101921	0	0	0	1	0	0
721	ENSMUSG00000101447	0	0	0	0	0	0
722	ENSMUSG00000081185	6	3	1	2	1	1
723	ENSMUSG00000103246	0	0	0	0	0	0
724	ENSMUSG00000098876	0	0	0	0	0	0
725	ENSMUSG00000100530	0	0	0	0	0	0
726	ENSMUSG00000104067	0	0	0	3	0	0
727	ENSMUSG00000100033	9	2	0	0	0	4
728	ENSMUSG00000094968	0	0	0	0	0	0
729	ENSMUSG00000088017	0	0	0	0	0	0
730	ENSMUSG00000101996	0	0	0	0	0	0
731	ENSMUSG00000096973	0	0	0	0	0	0
732	ENSMUSG00000064943	0	0	0	0	0	0
733	ENSMUSG00000100866	0	0	0	0	0	0
734	ENSMUSG00000101721	0	0	0	0	0	0
735	ENSMUSG00000099376	0	0	0	0	0	0
736	ENSMUSG00000097883	0	0	0	0	0	0
737	ENSMUSG00000092790	0	0	0	0	0	0
738	ENSMUSG00000099698	0	0	0	0	0	0
739	ENSMUSG00000099454	0	0	0	0	0	0
740	ENSMUSG00000051616	0	0	0	0	0	0
741	ENSMUSG00000099627	0	0	0	0	0	0
742	ENSMUSG00000099577	0	0	0	0	0	0
743	ENSMUSG00000099882	0	0	0	0	0	0
744	ENSMUSG00000101760	0	0	0	0	0	0
745	ENSMUSG00000099608	0	0	0	0	0	0
746	ENSMUSG00000099864	0	0	0	0	0	0
747	ENSMUSG00000098249	0	0	0	0	0	0
748	ENSMUSG00000100451	0	0	0	0	0	0
749	ENSMUSG00000099941	0	0	0	0	0	0
750	ENSMUSG00000084531	0	0	0	0	0	0
751	ENSMUSG00000100816	0	0	0	0	0	0
752	ENSMUSG00000026109	1149	1184	274	546	946	1128
753	ENSMUSG00000100671	10	12	0	5	7	1
754	ENSMUSG00000092906	0	0	0	0	0	0
755	ENSMUSG00000101242	3	2	0	0	0	0
756	ENSMUSG00000099924	8	9	1	1	2	0
757	ENSMUSG00000099625	5	10	0	1	2	5
758	ENSMUSG00000101799	16	6	0	4	12	6
759	ENSMUSG00000045954	207	173	54	138	196	206
760	ENSMUSG00000099741	3	0	0	0	1	0
761	ENSMUSG00000101702	0	0	0	0	0	0
762	ENSMUSG00000026107	166	177	50	90	133	180
763	ENSMUSG00000099413	0	3	0	3	2	7
764	ENSMUSG00000103424	0	0	0	0	0	0
765	ENSMUSG00000101741	6	6	1	3	10	6
766	ENSMUSG00000018417	321	342	71	158	269	299
767	ENSMUSG00000101724	0	0	0	0	0	0
768	ENSMUSG00000100313	0	0	0	0	0	0
769	ENSMUSG00000100696	2	0	0	0	0	0
770	ENSMUSG00000099135	0	0	0	0	0	0
771	ENSMUSG00000072324	0	5	0	0	1	6
772	ENSMUSG00000062939	3	5	2	0	7	1
773	ENSMUSG00000101628	0	0	0	0	0	0
774	ENSMUSG00000078291	0	0	0	0	0	0
775	ENSMUSG00000109599	10	12	2	0	17	8
776	ENSMUSG00000026104	148	153	55	101	155	126
777	ENSMUSG00000099569	0	0	1	0	0	0
778	ENSMUSG00000026103	5301	5013	1304	2639	4503	4322
779	ENSMUSG00000099648	0	0	0	0	0	0
780	ENSMUSG00000065192	0	0	0	0	0	0
781	ENSMUSG00000002881	558	465	123	281	551	410
782	ENSMUSG00000097833	2	1	3	2	4	1
783	ENSMUSG00000101501	5	0	3	2	0	1
784	ENSMUSG00000100120	0	0	0	0	0	3
785	ENSMUSG00000099878	3	0	0	0	1	0
786	ENSMUSG00000100007	24	10	5	8	20	19
787	ENSMUSG00000043015	233	223	46	155	178	160
788	ENSMUSG00000103630	12	9	2	11	4	2
789	ENSMUSG00000041439	2851	2843	785	1373	2550	2846
790	ENSMUSG00000100302	0	5	0	0	0	4
791	ENSMUSG00000100230	0	0	0	0	0	0
792	ENSMUSG00000026102	824	784	225	442	774	746
793	ENSMUSG00000041426	451	419	116	212	393	447
794	ENSMUSG00000089802	0	0	0	4	0	0
795	ENSMUSG00000043629	158	140	39	110	133	143
796	ENSMUSG00000026100	0	1	0	0	1	7
797	ENSMUSG00000089334	0	0	0	0	0	0
798	ENSMUSG00000060715	8	9	1	5	12	5
799	ENSMUSG00000026098	76	91	23	84	106	89
800	ENSMUSG00000100763	0	2	0	0	0	0
801	ENSMUSG00000026097	179	159	59	121	197	181
802	ENSMUSG00000100679	0	0	0	0	0	0
803	ENSMUSG00000026096	272	247	60	169	260	262
804	ENSMUSG00000099913	13	4	0	22	4	7
805	ENSMUSG00000101838	2	3	0	5	1	7
806	ENSMUSG00000026095	53	50	18	22	40	65
807	ENSMUSG00000117809	0	0	0	0	0	0
808	ENSMUSG00000100267	0	0	0	0	0	0
809	ENSMUSG00000099450	0	0	0	0	0	0
810	ENSMUSG00000100069	0	0	0	0	0	0
811	ENSMUSG00000096141	191	153	63	101	180	185
812	ENSMUSG00000092657	0	0	0	0	0	0
813	ENSMUSG00000026094	65	52	20	33	69	56
814	ENSMUSG00000102405	0	0	0	0	0	0
815	ENSMUSG00000042807	907	814	232	354	677	738
816	ENSMUSG00000098443	0	0	0	0	3	0
817	ENSMUSG00000087949	0	0	0	0	0	0
818	ENSMUSG00000102868	3	0	1	0	0	0
819	ENSMUSG00000094013	0	0	0	0	0	0
820	ENSMUSG00000025983	37	20	4	19	16	14
821	ENSMUSG00000041303	820	798	238	434	795	815
822	ENSMUSG00000109809	1	3	1	5	5	8
823	ENSMUSG00000073678	2850	2652	810	1402	2547	2290
824	ENSMUSG00000104136	12	7	8	4	8	7
825	ENSMUSG00000101130	3	0	0	0	0	0
826	ENSMUSG00000052331	680	514	164	403	583	570
827	ENSMUSG00000101674	4	9	2	0	1	3
828	ENSMUSG00000102503	12	3	1	0	9	8
829	ENSMUSG00000089245	0	0	0	0	0	0
830	ENSMUSG00000102642	7	0	0	0	0	0
831	ENSMUSG00000025982	6930	6038	1729	3555	5797	6326
832	ENSMUSG00000103030	0	2	0	0	0	1
833	ENSMUSG00000025981	368	386	93	202	351	374
834	ENSMUSG00000101122	19	15	3	20	7	22
835	ENSMUSG00000025980	3449	3212	799	1761	3003	3706
836	ENSMUSG00000073676	793	828	205	439	749	826
837	ENSMUSG00000100736	1	0	0	0	0	0
838	ENSMUSG00000089670	28	32	7	21	17	34
839	ENSMUSG00000025979	1144	1325	301	554	1174	1222
840	ENSMUSG00000061863	4	2	0	0	1	0
841	ENSMUSG00000025978	707	688	196	470	823	752
842	ENSMUSG00000097649	71	78	23	73	88	90
843	ENSMUSG00000046994	453	408	86	214	387	381
844	ENSMUSG00000025977	0	0	0	0	0	1
845	ENSMUSG00000100215	61	100	34	49	69	121
846	ENSMUSG00000101945	0	0	0	0	0	0
847	ENSMUSG00000101085	0	0	0	0	0	0
848	ENSMUSG00000038349	1350	1165	263	632	1266	1132
849	ENSMUSG00000102145	2	6	1	0	10	0
850	ENSMUSG00000100309	0	0	0	0	0	0
851	ENSMUSG00000102831	1	3	0	0	1	0
852	ENSMUSG00000099950	0	0	0	0	0	0
853	ENSMUSG00000102491	0	0	0	0	0	0
854	ENSMUSG00000100372	0	0	0	0	0	0
855	ENSMUSG00000100944	3	6	5	2	2	7
856	ENSMUSG00000101332	0	0	0	0	0	0
857	ENSMUSG00000045336	0	0	0	0	0	0
858	ENSMUSG00000038331	95	131	20	31	42	96
859	ENSMUSG00000087022	19	24	8	4	17	17
860	ENSMUSG00000104310	0	0	1	0	0	5
861	ENSMUSG00000094128	3	0	0	0	0	0
862	ENSMUSG00000099945	0	0	0	0	0	0
863	ENSMUSG00000101429	0	0	0	0	1	0
864	ENSMUSG00000101129	0	0	0	0	0	0
865	ENSMUSG00000097519	0	0	0	0	0	0
866	ENSMUSG00000038323	328	431	106	208	376	424
867	ENSMUSG00000048495	169	178	46	92	189	143
868	ENSMUSG00000025971	313	288	84	146	303	314
869	ENSMUSG00000077776	0	0	0	0	0	0
870	ENSMUSG00000088353	0	0	0	0	0	0
871	ENSMUSG00000101826	0	0	0	0	0	0
872	ENSMUSG00000102685	0	0	0	0	0	0
873	ENSMUSG00000101151	0	0	0	0	0	0
874	ENSMUSG00000038305	711	706	211	350	736	822
875	ENSMUSG00000091283	0	2	0	0	0	1
876	ENSMUSG00000054770	471	425	123	212	393	406
877	ENSMUSG00000026039	5	4	1	9	5	8
878	ENSMUSG00000063558	225	148	55	85	175	173
879	ENSMUSG00000064294	23	14	6	12	22	14
880	ENSMUSG00000089275	0	0	0	0	0	0
881	ENSMUSG00000038242	5	6	1	6	13	10
882	ENSMUSG00000089822	0	0	0	0	0	0
883	ENSMUSG00000079554	9	0	0	0	0	0
884	ENSMUSG00000103839	102	77	24	48	85	84
885	ENSMUSG00000051223	2416	2280	586	1120	2152	2420
886	ENSMUSG00000026034	2619	2040	643	1490	2028	2894
887	ENSMUSG00000026035	208	307	63	166	231	269
888	ENSMUSG00000026036	510	508	126	311	477	556
889	ENSMUSG00000026037	565	505	143	281	521	552
890	ENSMUSG00000094245	4	0	0	1	8	3
891	ENSMUSG00000085054	54	55	15	25	34	33
892	ENSMUSG00000038174	2227	2483	528	1024	2123	2055
893	ENSMUSG00000026032	748	822	182	463	906	974
894	ENSMUSG00000100202	0	0	0	0	0	0
895	ENSMUSG00000099490	0	0	0	0	0	0
896	ENSMUSG00000059647	15	2	0	5	5	7
897	ENSMUSG00000047528	23	5	5	27	16	6
898	ENSMUSG00000102059	22	18	4	12	3	21
899	ENSMUSG00000101046	0	0	0	0	0	0
900	ENSMUSG00000026031	531	421	141	314	464	453
901	ENSMUSG00000100236	0	0	0	0	0	0
902	ENSMUSG00000026029	44	42	6	17	19	13
903	ENSMUSG00000102719	0	0	0	0	0	0
904	ENSMUSG00000099719	1	0	2	1	3	3
905	ENSMUSG00000026028	2883	2390	563	1343	2450	2244
906	ENSMUSG00000026027	626	635	156	365	591	704
907	ENSMUSG00000072295	0	0	0	0	0	0
908	ENSMUSG00000047383	0	0	0	0	0	0
909	ENSMUSG00000099752	0	0	0	0	0	0
910	ENSMUSG00000077616	0	0	0	0	0	0
911	ENSMUSG00000038079	548	468	123	251	454	452
912	ENSMUSG00000097573	5	4	2	6	10	9
913	ENSMUSG00000079550	51	35	19	22	24	35
914	ENSMUSG00000101586	19	18	8	5	9	13
915	ENSMUSG00000099563	0	0	0	0	2	1
916	ENSMUSG00000026024	987	948	256	582	888	842
917	ENSMUSG00000026023	0	1	0	1	2	1
918	ENSMUSG00000099922	0	0	0	0	0	0
919	ENSMUSG00000104502	0	0	0	0	0	3
920	ENSMUSG00000041075	107	106	16	55	97	107
921	ENSMUSG00000097819	4	0	0	0	0	6
922	ENSMUSG00000047361	786	466	226	497	715	469
923	ENSMUSG00000099811	4	4	2	0	0	0
924	ENSMUSG00000101409	3	0	0	0	0	0
925	ENSMUSG00000026021	1229	1297	354	766	1300	1485
926	ENSMUSG00000089276	0	0	0	0	0	0
927	ENSMUSG00000103821	64	47	7	32	46	15
928	ENSMUSG00000101400	0	0	2	1	0	1
929	ENSMUSG00000026020	1605	1486	437	821	1374	1503
930	ENSMUSG00000077345	1	1	0	4	0	0
931	ENSMUSG00000077358	0	0	0	0	0	0
932	ENSMUSG00000089512	0	1	2	0	1	1
933	ENSMUSG00000089093	1	0	0	0	0	0
934	ENSMUSG00000067336	3997	3780	981	1554	3475	2967
935	ENSMUSG00000104052	0	0	0	0	1	0
936	ENSMUSG00000103131	0	1	0	0	0	0
937	ENSMUSG00000041040	1726	1521	479	855	1510	1690
938	ENSMUSG00000103696	2	1	4	0	0	0
939	ENSMUSG00000100901	0	1	0	0	0	0
940	ENSMUSG00000026018	838	901	220	454	792	904
941	ENSMUSG00000026019	779	758	253	414	694	911
942	ENSMUSG00000026017	568	487	158	293	435	431
943	ENSMUSG00000082609	2	1	3	1	0	1
944	ENSMUSG00000073664	1476	1325	341	562	1172	843
945	ENSMUSG00000100516	0	0	0	0	0	0
946	ENSMUSG00000049439	288	260	66	200	262	252
947	ENSMUSG00000103822	0	0	0	0	0	0
948	ENSMUSG00000026782	3027	3013	771	1375	2720	2788
949	ENSMUSG00000026014	1679	1503	467	732	1310	1518
950	ENSMUSG00000081562	1	9	2	0	3	10
951	ENSMUSG00000084400	0	0	0	0	0	0
952	ENSMUSG00000082160	4	10	1	2	2	3
953	ENSMUSG00000103215	3	0	0	0	2	0
954	ENSMUSG00000088973	0	0	0	0	0	0
955	ENSMUSG00000084151	0	0	0	0	0	0
956	ENSMUSG00000101188	453	499	118	275	507	496
957	ENSMUSG00000026012	1	2	0	0	4	6
958	ENSMUSG00000086795	0	0	0	0	0	0
959	ENSMUSG00000085965	0	0	0	0	0	0
960	ENSMUSG00000104069	0	0	0	0	0	0
961	ENSMUSG00000083118	0	0	0	0	0	0
962	ENSMUSG00000083355	0	0	0	0	0	0
963	ENSMUSG00000102549	0	2	0	1	5	0
964	ENSMUSG00000026011	0	0	0	0	6	2
965	ENSMUSG00000081382	16	14	1	13	23	13
966	ENSMUSG00000080800	0	0	1	0	0	0
967	ENSMUSG00000026009	0	1	0	0	1	0
968	ENSMUSG00000102561	0	0	0	0	0	0
969	ENSMUSG00000082804	0	0	0	0	0	0
970	ENSMUSG00000082661	0	0	0	0	0	0
971	ENSMUSG00000080785	0	0	0	0	0	0
972	ENSMUSG00000100893	0	0	0	0	0	0
973	ENSMUSG00000085248	1	0	0	0	0	0
974	ENSMUSG00000085447	0	0	0	0	0	1
975	ENSMUSG00000086408	0	0	0	0	0	0
976	ENSMUSG00000089546	0	0	0	0	1	0
977	ENSMUSG00000100965	0	0	0	0	0	0
978	ENSMUSG00000102168	0	0	0	0	0	0
979	ENSMUSG00000100381	0	0	0	0	0	0
980	ENSMUSG00000086009	0	0	0	0	0	0
981	ENSMUSG00000052062	154	100	36	95	148	130
982	ENSMUSG00000103656	0	0	0	0	0	0
983	ENSMUSG00000104402	0	0	0	0	0	0
984	ENSMUSG00000104081	0	0	0	0	0	0
985	ENSMUSG00000085842	0	0	0	0	0	0
986	ENSMUSG00000103002	0	0	0	0	0	0
987	ENSMUSG00000100344	0	0	0	0	0	0
988	ENSMUSG00000101509	0	0	0	0	0	0
989	ENSMUSG00000085019	0	0	0	0	1	0
990	ENSMUSG00000102359	0	0	0	0	0	0
991	ENSMUSG00000085400	0	2	0	0	0	3
992	ENSMUSG00000100750	11	16	6	6	16	11
993	ENSMUSG00000081950	0	0	0	0	0	1
994	ENSMUSG00000084333	0	1	3	4	0	1
995	ENSMUSG00000025969	2301	2299	672	1181	1997	2257
996	ENSMUSG00000100811	10	24	5	9	24	17
997	ENSMUSG00000103032	27	26	7	7	23	18
998	ENSMUSG00000100426	2	0	0	0	1	2
999	ENSMUSG00000040865	1082	854	274	466	888	638
1000	ENSMUSG00000104991	0	0	2	0	0	0
1001	ENSMUSG00000088953	0	0	0	0	0	0
1002	ENSMUSG00000081617	0	0	0	0	0	0
1003	ENSMUSG00000081429	4	0	0	1	0	0
1004	ENSMUSG00000084799	104	95	20	50	61	80
1005	ENSMUSG00000101599	206	141	51	92	115	148
1006	ENSMUSG00000025968	2472	2496	700	1535	2568	2810
1007	ENSMUSG00000077884	0	0	0	0	0	3
1008	ENSMUSG00000025967	2371	2294	680	1472	2400	2901
1009	ENSMUSG00000098850	0	0	0	0	0	0
1010	ENSMUSG00000064612	0	0	0	0	0	0
1011	ENSMUSG00000105060	0	0	0	0	0	0
1012	ENSMUSG00000064602	5	7	6	8	1	12
1013	ENSMUSG00000046856	33	44	9	25	42	56
1014	ENSMUSG00000094290	1	0	0	0	0	0
1015	ENSMUSG00000086730	0	0	0	0	0	0
1016	ENSMUSG00000102536	7	1	1	3	1	2
1017	ENSMUSG00000087561	6	2	0	0	0	2
1018	ENSMUSG00000092705	0	0	0	0	0	0
1019	ENSMUSG00000027520	3713	3615	1032	1639	2954	2880
1020	ENSMUSG00000094214	1	0	1	0	0	0
1021	ENSMUSG00000083039	0	0	0	0	0	0
1022	ENSMUSG00000081643	7	7	0	1	8	16
1023	ENSMUSG00000025964	2809	2942	849	1315	2504	2637
1024	ENSMUSG00000087823	21	11	3	7	8	8
1025	ENSMUSG00000115378	2	0	0	0	1	2
1026	ENSMUSG00000069085	32	18	9	9	5	11
1027	ENSMUSG00000083066	0	0	0	0	0	0
1028	ENSMUSG00000025963	100	35	25	67	65	98
1029	ENSMUSG00000025962	449	435	139	269	412	462
1030	ENSMUSG00000025961	56	41	10	15	42	28
1031	ENSMUSG00000080817	3	0	0	0	0	0
1032	ENSMUSG00000082373	0	0	0	0	0	2
1033	ENSMUSG00000044689	1	0	0	0	0	0
1034	ENSMUSG00000025959	1079	870	257	541	871	879
1035	ENSMUSG00000098487	0	0	0	0	0	0
1036	ENSMUSG00000086836	2	1	0	0	0	1
1037	ENSMUSG00000086721	0	0	0	0	0	0
1038	ENSMUSG00000101895	8	0	1	2	1	0
1039	ENSMUSG00000093228	0	0	0	0	0	0
1040	ENSMUSG00000099658	0	0	0	0	0	0
1041	ENSMUSG00000025958	1233	1044	300	576	1082	1056
1042	ENSMUSG00000025956	211	196	67	111	237	229
1043	ENSMUSG00000101832	4	2	2	3	0	0
1044	ENSMUSG00000100437	0	0	0	0	0	0
1045	ENSMUSG00000087213	1	5	0	0	0	0
1046	ENSMUSG00000070871	225	221	71	119	187	235
1047	ENSMUSG00000045005	141	259	42	76	138	143
1048	ENSMUSG00000102140	15	9	5	5	10	23
1049	ENSMUSG00000051344	1249	1180	328	636	1064	1094
1050	ENSMUSG00000097264	0	0	0	0	1	0
1051	ENSMUSG00000084416	71	81	52	52	80	66
1052	ENSMUSG00000077471	0	0	0	0	0	0
1053	ENSMUSG00000025955	0	0	0	0	0	0
1054	ENSMUSG00000090042	0	0	0	0	0	0
1055	ENSMUSG00000070870	0	0	0	0	0	0
1056	ENSMUSG00000067299	0	0	1	0	0	0
1057	ENSMUSG00000025952	0	0	0	0	0	0
1058	ENSMUSG00000073658	0	0	0	0	0	0
1059	ENSMUSG00000100774	1	3	0	5	6	3
1060	ENSMUSG00000044429	0	0	0	0	0	2
1061	ENSMUSG00000100846	0	0	0	0	0	0
1062	ENSMUSG00000044816	55	93	13	32	27	90
1063	ENSMUSG00000025950	1157	1063	291	630	1135	1050
1064	ENSMUSG00000025949	1400	1095	316	605	1073	985
1065	ENSMUSG00000025946	31	47	23	21	19	31
1066	ENSMUSG00000100503	0	0	0	0	0	0
1067	ENSMUSG00000100504	0	0	0	0	0	0
1068	ENSMUSG00000099383	0	0	0	0	0	0
1069	ENSMUSG00000100340	0	0	0	0	0	0
1070	ENSMUSG00000100439	0	0	0	0	0	0
1071	ENSMUSG00000099819	0	0	0	0	0	0
1072	ENSMUSG00000082565	0	0	0	0	0	0
1073	ENSMUSG00000082774	0	0	0	0	0	0
1074	ENSMUSG00000025945	0	0	0	0	0	0
1075	ENSMUSG00000081623	0	0	0	0	0	0
1076	ENSMUSG00000083242	0	0	0	0	0	0
1077	ENSMUSG00000083289	0	0	0	0	0	0
1078	ENSMUSG00000015222	33376	32337	8964	16170	29225	31059
1079	ENSMUSG00000088850	0	0	0	0	0	0
1080	ENSMUSG00000073656	0	3	1	2	1	1
1081	ENSMUSG00000065694	2	5	2	4	4	0
1082	ENSMUSG00000055567	11272	10186	2743	5168	9362	8666
1083	ENSMUSG00000103375	95	105	19	48	84	42
1084	ENSMUSG00000026005	277	242	86	130	285	257
1085	ENSMUSG00000026004	368	348	70	177	270	237
1086	ENSMUSG00000102559	47	48	9	21	34	29
1087	ENSMUSG00000102374	17	31	9	8	51	26
1088	ENSMUSG00000102776	48	32	10	5	44	11
1089	ENSMUSG00000082057	11	14	3	2	10	1
1090	ENSMUSG00000103706	21	9	5	7	24	4
1091	ENSMUSG00000103756	13	14	3	3	20	6
1092	ENSMUSG00000103382	41	44	5	10	37	22
1093	ENSMUSG00000103553	1	2	0	2	1	4
1094	ENSMUSG00000026003	593	602	120	361	654	632
1095	ENSMUSG00000082769	23	11	6	19	19	28
1096	ENSMUSG00000089420	0	0	0	0	0	0
1097	ENSMUSG00000077328	0	0	0	0	0	0
1098	ENSMUSG00000061816	6	6	3	3	1	1
1099	ENSMUSG00000094191	1	4	1	2	1	3
1100	ENSMUSG00000082212	0	2	0	0	0	0
1101	ENSMUSG00000026000	1906	1977	602	1153	1863	2189
1102	ENSMUSG00000025991	14	16	0	2	20	9
1103	ENSMUSG00000086204	0	0	0	0	0	0
1104	ENSMUSG00000077745	0	0	0	0	0	0
1105	ENSMUSG00000082473	0	0	0	0	0	0
1106	ENSMUSG00000095282	0	0	0	0	0	0
1107	ENSMUSG00000085075	0	0	0	0	0	0
1108	ENSMUSG00000104395	0	0	0	0	0	0
1109	ENSMUSG00000096031	0	0	0	0	0	0
1110	ENSMUSG00000087329	0	0	0	0	0	0
1111	ENSMUSG00000062209	1763	2049	520	883	1742	1566
1112	ENSMUSG00000102449	0	0	0	0	0	0
1113	ENSMUSG00000083795	0	0	1	4	0	0
1114	ENSMUSG00000080539	0	0	0	0	0	0
1115	ENSMUSG00000103307	0	0	0	1	0	0
1116	ENSMUSG00000104508	0	0	1	0	2	0
1117	ENSMUSG00000103642	0	0	0	0	0	0
1118	ENSMUSG00000103809	0	0	0	0	0	2
1119	ENSMUSG00000087514	0	0	0	0	0	0
1120	ENSMUSG00000084332	0	0	0	0	0	0
1121	ENSMUSG00000101387	0	0	1	0	3	0
1122	ENSMUSG00000099804	0	0	0	0	0	1
1123	ENSMUSG00000100354	0	0	0	0	2	0
1124	ENSMUSG00000101156	0	0	0	0	0	0
1125	ENSMUSG00000025997	141	124	28	63	106	107
1126	ENSMUSG00000100815	0	0	0	0	0	0
1127	ENSMUSG00000099954	0	0	0	0	0	0
1128	ENSMUSG00000103402	0	0	0	0	0	0
1129	ENSMUSG00000053153	175	84	51	118	170	98
1130	ENSMUSG00000089345	0	0	0	0	0	2
1131	ENSMUSG00000080524	0	0	0	0	0	0
1132	ENSMUSG00000101730	0	0	0	0	0	0
1133	ENSMUSG00000103052	0	0	0	0	0	0
1134	ENSMUSG00000104287	0	0	0	0	0	0
1135	ENSMUSG00000075952	0	0	0	0	0	0
1136	ENSMUSG00000045648	467	488	152	282	422	497
1137	ENSMUSG00000026196	44	32	11	23	67	35
1138	ENSMUSG00000089965	0	0	0	0	0	0
1139	ENSMUSG00000101551	0	0	3	0	0	0
1140	ENSMUSG00000050296	4	1	1	2	4	16
1141	ENSMUSG00000101617	0	0	0	0	0	0
1142	ENSMUSG00000026192	1099	970	366	671	1019	1203
1143	ENSMUSG00000026193	767	591	207	422	639	610
1144	ENSMUSG00000073652	0	0	0	0	2	0
1145	ENSMUSG00000101834	5	9	0	0	1	6
1146	ENSMUSG00000100319	4	5	0	0	0	0
1147	ENSMUSG00000102689	0	0	0	0	0	0
1148	ENSMUSG00000099707	0	0	0	0	0	0
1149	ENSMUSG00000101211	0	0	0	1	0	0
1150	ENSMUSG00000101848	0	0	0	0	0	0
1151	ENSMUSG00000101764	0	0	0	0	0	0
1152	ENSMUSG00000059483	0	0	0	0	0	0
1153	ENSMUSG00000101496	0	0	0	0	0	0
1154	ENSMUSG00000102123	1	1	0	0	0	5
1155	ENSMUSG00000039395	172	178	50	94	173	193
1156	ENSMUSG00000094655	0	0	0	0	0	0
1157	ENSMUSG00000094050	0	0	0	0	1	1
1158	ENSMUSG00000093956	8	2	0	14	1	2
1159	ENSMUSG00000093843	4	0	1	2	1	0
1160	ENSMUSG00000026189	64	68	15	32	66	79
1161	ENSMUSG00000026188	349	331	125	163	313	392
1162	ENSMUSG00000026187	512	503	124	309	506	501
1163	ENSMUSG00000039372	613	456	195	318	492	526
1164	ENSMUSG00000085812	0	0	0	0	4	0
1165	ENSMUSG00000039354	1534	1393	414	838	1496	1568
1166	ENSMUSG00000110712	3	6	2	5	6	1
1167	ENSMUSG00000039342	0	1	1	0	2	0
1168	ENSMUSG00000110487	0	0	0	0	0	0
1169	ENSMUSG00000110596	0	0	0	0	0	0
1170	ENSMUSG00000046330	1644	1423	491	1188	1544	1487
1171	ENSMUSG00000039323	86	35	12	31	71	55
1172	ENSMUSG00000026185	10945	8857	1653	5813	10426	6714
1173	ENSMUSG00000101968	0	1	0	0	1	2
1174	ENSMUSG00000026182	0	1	0	0	0	0
1175	ENSMUSG00000102266	0	0	0	0	0	0
1176	ENSMUSG00000101112	0	0	0	0	1	0
1177	ENSMUSG00000100697	0	0	0	0	0	0
1178	ENSMUSG00000099877	2	0	0	0	2	0
1179	ENSMUSG00000098697	0	0	0	0	0	0
1180	ENSMUSG00000101812	0	0	0	0	0	0
1181	ENSMUSG00000100044	0	0	0	0	0	0
1182	ENSMUSG00000100444	0	1	0	0	0	0
1183	ENSMUSG00000100429	0	0	0	0	0	0
1184	ENSMUSG00000100301	22	15	1	11	8	15
1185	ENSMUSG00000101344	2	4	0	6	2	0
1186	ENSMUSG00000088666	0	3	0	0	0	0
1187	ENSMUSG00000098504	0	0	0	0	0	0
1188	ENSMUSG00000055322	1296	1030	330	662	1129	1314
1189	ENSMUSG00000061815	16	7	1	3	18	23
1190	ENSMUSG00000026180	0	0	0	0	4	0
1191	ENSMUSG00000048480	0	0	0	0	0	0
1192	ENSMUSG00000087820	0	0	0	0	0	0
1193	ENSMUSG00000094768	0	0	0	0	0	0
1194	ENSMUSG00000006304	1743	1820	493	976	1884	2053
1195	ENSMUSG00000064272	0	0	0	0	0	0
1196	ENSMUSG00000006299	2456	2353	664	1403	2541	2739
1197	ENSMUSG00000101503	0	0	0	0	0	0
1198	ENSMUSG00000026179	3829	4040	1032	1879	4348	4205
1199	ENSMUSG00000103013	6	6	1	0	4	7
1200	ENSMUSG00000006301	1035	847	188	460	895	628
1201	ENSMUSG00000099931	0	0	0	0	0	0
1202	ENSMUSG00000103403	2	6	1	3	9	0
1203	ENSMUSG00000073650	258	79	57	169	176	123
1204	ENSMUSG00000026177	45	33	9	29	35	21
1205	ENSMUSG00000026176	749	572	154	455	691	511
1206	ENSMUSG00000065468	0	0	0	0	1	2
1207	ENSMUSG00000026175	7	2	5	3	13	7
1208	ENSMUSG00000033364	697	704	191	373	691	620
1209	ENSMUSG00000103227	5	3	1	0	3	4
1210	ENSMUSG00000026174	634	515	159	344	500	622
1211	ENSMUSG00000026173	761	610	159	516	729	750
1212	ENSMUSG00000026135	1116	968	321	594	954	1016
1213	ENSMUSG00000093155	1	3	0	0	0	0
1214	ENSMUSG00000026172	307	302	72	191	318	341
1215	ENSMUSG00000026171	1519	1191	413	802	1260	1442
1216	ENSMUSG00000033276	433	251	105	288	318	279
1217	ENSMUSG00000033257	934	733	218	565	750	647
1218	ENSMUSG00000026170	174	102	28	61	125	76
1219	ENSMUSG00000006542	14	1	0	2	0	2
1220	ENSMUSG00000098351	0	0	0	0	0	0
1221	ENSMUSG00000033227	12	5	2	2	15	11
1222	ENSMUSG00000099472	0	0	1	0	1	0
1223	ENSMUSG00000026167	4	3	1	0	1	3
1224	ENSMUSG00000089964	1	0	2	0	3	0
1225	ENSMUSG00000090071	1607	1594	430	894	1474	1996
1226	ENSMUSG00000055197	4	0	0	0	6	9
1227	ENSMUSG00000006546	0	0	0	0	0	0
1228	ENSMUSG00000065616	0	0	0	0	0	0
1229	ENSMUSG00000047021	1388	450	334	972	842	837
1230	ENSMUSG00000089653	2	0	0	0	0	0
1231	ENSMUSG00000006538	4	5	0	7	3	8
1232	ENSMUSG00000103145	0	0	0	0	4	2
1233	ENSMUSG00000026162	25	23	9	13	30	23
1234	ENSMUSG00000026205	0	0	0	0	0	0
1235	ENSMUSG00000033159	596	511	189	433	600	548
1236	ENSMUSG00000049339	4245	4108	1178	2456	3951	4436
1237	ENSMUSG00000026197	190	141	61	129	193	160
1238	ENSMUSG00000026198	37	26	12	10	33	25
1239	ENSMUSG00000099519	0	0	0	0	0	0
1240	ENSMUSG00000033124	1320	1225	365	703	1260	1140
1241	ENSMUSG00000026199	640	521	158	296	446	510
1242	ENSMUSG00000026200	293	197	70	183	230	276
1243	ENSMUSG00000099204	0	0	0	0	0	0
1244	ENSMUSG00000026201	878	800	290	476	772	825
1245	ENSMUSG00000026202	4553	4984	1377	2666	4901	5637
1246	ENSMUSG00000096094	3	3	2	1	5	2
1247	ENSMUSG00000118482	0	0	0	0	3	0
1248	ENSMUSG00000026203	2482	2221	594	1355	2317	2242
1249	ENSMUSG00000026204	15661	12469	4205	9018	13656	13095
1250	ENSMUSG00000101840	15	9	5	8	9	15
1251	ENSMUSG00000033061	4284	4478	1425	2945	4188	4976
1252	ENSMUSG00000100556	9	10	4	12	12	16
1253	ENSMUSG00000026209	661	527	163	338	596	538
1254	ENSMUSG00000026208	21	4	0	12	22	20
1255	ENSMUSG00000085653	0	4	0	0	0	0
1256	ENSMUSG00000026207	1647	1281	422	857	1196	1540
1257	ENSMUSG00000086053	1	0	0	1	0	0
1258	ENSMUSG00000033021	804	650	208	395	598	662
1259	ENSMUSG00000033007	123	142	70	121	110	230
1260	ENSMUSG00000102605	3	7	1	2	9	12
1261	ENSMUSG00000032997	1554	1475	473	901	1412	1684
1262	ENSMUSG00000026211	479	376	115	278	383	438
1263	ENSMUSG00000051703	338	295	90	184	304	297
1264	ENSMUSG00000032968	571	457	136	278	362	431
1265	ENSMUSG00000082745	0	0	0	0	0	0
1266	ENSMUSG00000026213	819	612	218	550	652	602
1267	ENSMUSG00000082059	0	0	0	0	0	0
1268	ENSMUSG00000006576	3326	2916	846	1775	2779	3089
1269	ENSMUSG00000083244	0	0	0	0	0	0
1270	ENSMUSG00000082528	0	0	0	0	0	0
1271	ENSMUSG00000082012	0	0	0	0	0	0
1272	ENSMUSG00000099996	0	0	0	0	0	0
1273	ENSMUSG00000101763	0	0	0	0	0	0
1274	ENSMUSG00000100827	0	0	0	0	0	0
1275	ENSMUSG00000100553	0	2	0	0	0	0
1276	ENSMUSG00000098611	0	0	0	0	0	0
1277	ENSMUSG00000100534	8	1	2	3	10	1
1278	ENSMUSG00000102904	0	0	0	0	0	0
1279	ENSMUSG00000089326	0	0	0	0	0	0
1280	ENSMUSG00000026235	1346	1414	311	636	1338	1078
1281	ENSMUSG00000099141	0	0	0	0	0	0
1282	ENSMUSG00000101849	1	2	3	0	5	5
1283	ENSMUSG00000101506	0	0	0	0	0	0
1284	ENSMUSG00000065215	0	0	0	0	0	0
1285	ENSMUSG00000102052	0	0	0	0	0	0
1286	ENSMUSG00000004872	0	0	0	0	0	0
1287	ENSMUSG00000118426	0	0	0	0	0	0
1288	ENSMUSG00000032908	563	569	118	301	596	560
1289	ENSMUSG00000099561	1	0	1	2	1	1
1290	ENSMUSG00000102945	0	0	0	0	0	0
1291	ENSMUSG00000026245	1366	1299	393	850	1381	1479
1292	ENSMUSG00000101798	0	6	0	0	1	0
1293	ENSMUSG00000104018	52	28	11	20	36	26
1294	ENSMUSG00000090486	304	293	112	157	248	348
1295	ENSMUSG00000012187	17	18	8	19	27	34
1296	ENSMUSG00000099364	8	1	1	3	6	0
1297	ENSMUSG00000100562	0	0	0	0	0	0
1298	ENSMUSG00000032883	4062	3571	1021	2048	3877	3986
1299	ENSMUSG00000079470	452	414	116	277	425	355
1300	ENSMUSG00000099377	4	5	3	3	6	4
1301	ENSMUSG00000099706	1	0	0	0	0	0
1302	ENSMUSG00000047330	11	11	3	5	10	17
1303	ENSMUSG00000101324	0	0	0	0	1	0
1304	ENSMUSG00000072978	17	12	4	14	21	28
1305	ENSMUSG00000050711	28279	25578	6739	17248	28742	25144
1306	ENSMUSG00000099562	0	0	0	0	0	0
1307	ENSMUSG00000077782	0	0	0	0	0	0
1308	ENSMUSG00000054702	43	39	14	18	41	52
1309	ENSMUSG00000102235	0	2	3	1	0	1
1310	ENSMUSG00000073643	1988	1848	463	1002	1762	1673
1311	ENSMUSG00000104497	3	0	0	0	0	0
1312	ENSMUSG00000026248	430	417	113	241	389	446
1313	ENSMUSG00000026249	3640	3616	901	2069	3864	3740
1314	ENSMUSG00000067106	16	16	4	12	21	27
1315	ENSMUSG00000100397	3	3	3	3	1	1
1316	ENSMUSG00000099753	0	0	0	0	0	0
1317	ENSMUSG00000096297	2	0	0	0	0	0
1318	ENSMUSG00000102518	0	0	0	0	0	0
1319	ENSMUSG00000099552	0	0	0	0	0	0
1320	ENSMUSG00000043230	0	0	0	0	0	0
1321	ENSMUSG00000101257	1	1	0	0	0	0
1322	ENSMUSG00000103404	0	2	0	0	0	0
1323	ENSMUSG00000004364	2819	2667	758	1509	2595	2800
1324	ENSMUSG00000103076	12	15	2	14	8	7
1325	ENSMUSG00000103525	1	5	0	0	3	0
1326	ENSMUSG00000101722	0	0	0	0	0	0
1327	ENSMUSG00000090637	0	0	0	0	0	0
1328	ENSMUSG00000101483	0	0	0	0	0	0
1329	ENSMUSG00000110100	0	0	0	0	0	0
1330	ENSMUSG00000038608	2049	1835	441	848	1707	1740
1331	ENSMUSG00000103192	5	3	0	3	0	0
1332	ENSMUSG00000104488	0	1	0	0	1	0
1333	ENSMUSG00000102721	0	0	0	0	6	1
1334	ENSMUSG00000099949	0	0	0	0	0	0
1335	ENSMUSG00000099918	0	0	0	0	0	0
1336	ENSMUSG00000054976	438	483	157	195	302	515
1337	ENSMUSG00000104029	3	2	0	0	0	0
1338	ENSMUSG00000101986	0	0	0	0	0	0
1339	ENSMUSG00000087008	3	5	0	0	2	3
1340	ENSMUSG00000100561	0	0	0	0	0	0
1341	ENSMUSG00000103571	0	0	0	0	0	0
1342	ENSMUSG00000098797	0	0	0	0	0	0
1343	ENSMUSG00000055980	392	321	135	205	317	347
1344	ENSMUSG00000022591	0	0	0	0	0	0
1345	ENSMUSG00000026142	303	229	71	202	275	280
1346	ENSMUSG00000104493	0	0	0	0	0	2
1347	ENSMUSG00000100786	0	0	1	0	0	0
1348	ENSMUSG00000096779	0	0	0	0	0	0
1349	ENSMUSG00000067158	42	31	21	27	30	9
1350	ENSMUSG00000079465	36	25	9	16	22	13
1351	ENSMUSG00000065055	0	0	0	0	0	0
1352	ENSMUSG00000097564	2	2	0	2	2	0
1353	ENSMUSG00000026150	3046	3185	851	1738	3124	3113
1354	ENSMUSG00000101450	39	27	18	25	41	12
1355	ENSMUSG00000026149	0	2	0	0	0	0
1356	ENSMUSG00000114299	3	0	0	0	0	0
1357	ENSMUSG00000099771	0	0	0	0	0	0
1358	ENSMUSG00000102280	0	0	0	0	0	0
1359	ENSMUSG00000100170	0	0	0	0	0	0
1360	ENSMUSG00000100744	0	0	0	0	0	0
1361	ENSMUSG00000093782	0	0	0	0	0	0
1362	ENSMUSG00000026159	2047	1997	542	1014	1836	1673
1363	ENSMUSG00000113880	4	7	3	5	4	0
1364	ENSMUSG00000113973	2	0	0	0	0	0
1365	ENSMUSG00000113846	0	0	0	0	0	0
1366	ENSMUSG00000113084	0	0	0	0	0	0
1367	ENSMUSG00000113925	1	0	0	0	0	0
1368	ENSMUSG00000114011	0	0	0	0	0	0
1369	ENSMUSG00000113097	0	0	0	0	0	0
1370	ENSMUSG00000101784	0	4	1	1	1	2
1371	ENSMUSG00000038496	46	29	14	15	31	39
1372	ENSMUSG00000100432	0	0	0	1	0	3
1373	ENSMUSG00000100190	0	0	0	0	0	0
1374	ENSMUSG00000113267	0	0	0	0	0	0
1375	ENSMUSG00000104423	0	0	0	0	0	0
1376	ENSMUSG00000101315	0	0	0	0	0	0
1377	ENSMUSG00000099691	0	0	0	0	0	0
1378	ENSMUSG00000026166	0	0	0	0	0	0
1379	ENSMUSG00000101173	0	0	0	0	0	0
1380	ENSMUSG00000053161	154	33	24	89	73	58
1381	ENSMUSG00000101896	0	0	0	0	0	0
1382	ENSMUSG00000084443	0	0	0	0	0	0
1383	ENSMUSG00000026163	2162	2232	615	1249	1804	2305
1384	ENSMUSG00000079140	2	1	0	3	4	0
1385	ENSMUSG00000104374	0	0	0	1	0	0
1386	ENSMUSG00000104219	0	0	0	0	0	0
1387	ENSMUSG00000100580	2	0	0	0	0	0
1388	ENSMUSG00000094946	0	0	0	0	0	0
1389	ENSMUSG00000077736	0	0	0	0	0	0
1390	ENSMUSG00000045658	697	678	190	435	739	718
1391	ENSMUSG00000102750	0	0	0	0	0	0
1392	ENSMUSG00000101934	0	0	0	0	0	0
1393	ENSMUSG00000098851	0	0	0	0	0	0
1394	ENSMUSG00000036766	7150	6239	1741	4010	6532	6545
1395	ENSMUSG00000104396	18	8	2	1	15	9
1396	ENSMUSG00000102481	0	2	0	0	0	0
1397	ENSMUSG00000093254	0	0	0	0	0	0
1398	ENSMUSG00000026219	5955	5457	1496	2880	5230	5208
1399	ENSMUSG00000103505	0	5	3	2	5	1
1400	ENSMUSG00000104503	0	4	1	4	2	6
1401	ENSMUSG00000073633	108	57	29	68	75	86
1402	ENSMUSG00000026220	89	95	23	42	64	125
1403	ENSMUSG00000118590	0	1	0	0	0	0
1404	ENSMUSG00000099693	0	0	0	0	0	0
1405	ENSMUSG00000052477	0	0	0	0	1	0
1406	ENSMUSG00000064281	5	10	1	4	11	4
1407	ENSMUSG00000098842	0	0	0	0	0	0
1408	ENSMUSG00000118640	0	0	0	0	0	0
1409	ENSMUSG00000061852	0	0	0	0	0	0
1410	ENSMUSG00000089976	0	0	0	0	0	1
1411	ENSMUSG00000101279	0	0	0	0	0	0
1412	ENSMUSG00000089844	6	0	1	6	3	9
1413	ENSMUSG00000073631	0	0	0	0	0	0
1414	ENSMUSG00000072109	0	0	0	1	0	0
1415	ENSMUSG00000090128	0	0	0	0	0	0
1416	ENSMUSG00000090186	0	0	0	0	0	0
1417	ENSMUSG00000089716	2	2	1	0	1	8
1418	ENSMUSG00000118618	0	0	0	0	0	0
1419	ENSMUSG00000079457	0	0	0	0	0	0
1420	ENSMUSG00000090252	0	0	0	0	0	0
1421	ENSMUSG00000079455	0	0	0	0	0	0
1422	ENSMUSG00000091199	0	0	0	0	0	0
1423	ENSMUSG00000089652	0	0	0	0	0	0
1424	ENSMUSG00000089937	0	0	0	0	0	0
1425	ENSMUSG00000118591	0	0	0	0	0	0
1426	ENSMUSG00000101751	0	5	2	0	0	3
1427	ENSMUSG00000089714	0	0	0	0	0	0
1428	ENSMUSG00000118607	0	0	0	0	0	0
1429	ENSMUSG00000118632	0	0	0	0	0	0
1430	ENSMUSG00000094127	0	0	0	0	0	0
1431	ENSMUSG00000070034	9	9	1	4	3	12
1432	ENSMUSG00000090103	0	0	0	0	1	0
1433	ENSMUSG00000070031	9	9	1	5	10	11
1434	ENSMUSG00000073628	0	0	0	0	0	0
1435	ENSMUSG00000090246	0	0	0	0	0	2
1436	ENSMUSG00000026222	47	23	7	21	39	18
1437	ENSMUSG00000064414	0	0	0	0	0	0
1438	ENSMUSG00000052760	10	5	4	27	12	10
1439	ENSMUSG00000098634	0	0	0	0	0	0
1440	ENSMUSG00000094834	0	0	0	0	0	0
1441	ENSMUSG00000100217	1	0	0	0	1	0
1442	ENSMUSG00000092932	0	0	0	0	0	0
1443	ENSMUSG00000036707	3382	3398	852	1721	3354	3496
1444	ENSMUSG00000026223	17893	16086	4688	10555	16674	18252
1445	ENSMUSG00000026224	126	120	38	98	129	110
1446	ENSMUSG00000099767	38	17	15	26	29	63
1447	ENSMUSG00000049608	64	39	11	42	67	42
1448	ENSMUSG00000100108	3	0	0	0	2	2
1449	ENSMUSG00000099342	15	9	5	12	15	18
1450	ENSMUSG00000026226	13	17	6	11	19	14
1451	ENSMUSG00000026227	218	244	48	151	244	216
1452	ENSMUSG00000026229	3114	2766	877	1732	2983	3292
1453	ENSMUSG00000077274	0	0	0	2	0	2
1454	ENSMUSG00000026228	6	5	0	7	10	7
1455	ENSMUSG00000103272	29	25	1	20	30	14
1456	ENSMUSG00000094638	0	0	0	0	0	0
1457	ENSMUSG00000062590	1025	867	247	553	797	1048
1458	ENSMUSG00000087538	4	8	0	1	3	2
1459	ENSMUSG00000079445	75	44	22	38	83	32
1460	ENSMUSG00000099644	0	0	0	0	0	0
1461	ENSMUSG00000091806	0	0	0	0	0	0
1462	ENSMUSG00000101853	1	0	0	0	0	0
1463	ENSMUSG00000026234	6608	6507	1757	3880	6276	7386
1464	ENSMUSG00000064837	0	0	0	0	0	0
1465	ENSMUSG00000104627	0	0	0	0	0	0
1466	ENSMUSG00000064696	0	0	0	0	0	0
1467	ENSMUSG00000064823	2	0	0	0	0	0
1468	ENSMUSG00000073627	41	26	10	8	31	31
1469	ENSMUSG00000110510	0	0	0	0	0	0
1470	ENSMUSG00000026237	5	1	0	0	4	2
1471	ENSMUSG00000036574	1	0	0	0	0	2
1472	ENSMUSG00000101328	0	0	0	0	2	0
1473	ENSMUSG00000026238	3523	2699	772	1848	3020	2870
1474	ENSMUSG00000026239	624	530	168	370	604	550
1475	ENSMUSG00000102927	1	0	0	3	3	0
1476	ENSMUSG00000026240	319	318	88	174	268	280
1477	ENSMUSG00000084468	0	4	0	0	0	0
1478	ENSMUSG00000103609	3	4	2	1	2	1
1479	ENSMUSG00000026241	68	48	12	34	51	49
1480	ENSMUSG00000053333	522	498	153	341	537	510
1481	ENSMUSG00000100225	0	0	0	0	1	0
1482	ENSMUSG00000100768	2	0	0	2	0	0
1483	ENSMUSG00000104121	1	6	0	0	2	0
1484	ENSMUSG00000102383	0	3	0	2	2	0
1485	ENSMUSG00000104400	1	0	0	0	0	0
1486	ENSMUSG00000102293	1	0	0	1	1	0
1487	ENSMUSG00000102649	1	1	0	0	0	0
1488	ENSMUSG00000084106	670	654	203	484	638	867
1489	ENSMUSG00000102571	1	0	0	0	0	0
1490	ENSMUSG00000099401	0	2	0	0	1	0
1491	ENSMUSG00000102956	0	0	0	1	0	0
1492	ENSMUSG00000103984	18	25	3	23	30	7
1493	ENSMUSG00000101940	4	2	1	7	2	3
1494	ENSMUSG00000101625	0	0	0	0	0	0
1495	ENSMUSG00000026246	0	0	0	0	0	0
1496	ENSMUSG00000079440	0	0	0	0	0	0
1497	ENSMUSG00000100940	0	0	0	0	0	0
1498	ENSMUSG00000036500	0	1	0	0	0	0
1499	ENSMUSG00000099839	77	88	15	50	42	69
1500	ENSMUSG00000026247	2056	2259	725	1110	1383	2431
1501	ENSMUSG00000036480	3	5	0	1	0	5
1502	ENSMUSG00000026251	0	0	0	0	0	0
1503	ENSMUSG00000026253	2	0	0	0	2	0
1504	ENSMUSG00000026254	1130	1001	318	660	1034	1142
1505	ENSMUSG00000088318	0	0	0	0	0	0
1506	ENSMUSG00000026255	480	384	93	199	406	279
1507	ENSMUSG00000089821	0	0	0	0	0	0
1508	ENSMUSG00000048000	1623	1484	411	765	1412	1441
1509	ENSMUSG00000095281	1	0	0	0	0	0
1510	ENSMUSG00000079436	3	2	1	3	12	2
1511	ENSMUSG00000089613	0	0	0	0	0	0
1512	ENSMUSG00000026258	1	0	0	0	1	0
1513	ENSMUSG00000026259	1390	1183	361	743	1239	1399
1514	ENSMUSG00000079434	50	31	7	26	60	18
1515	ENSMUSG00000091123	0	0	0	0	0	0
1516	ENSMUSG00000090994	2	1	0	0	0	1
1517	ENSMUSG00000026288	233	162	54	109	219	189
1518	ENSMUSG00000026289	1302	1122	312	668	979	1309
1519	ENSMUSG00000087968	5	2	3	1	4	6
1520	ENSMUSG00000089281	2	1	6	0	4	3
1521	ENSMUSG00000056055	16	22	7	6	27	13
1522	ENSMUSG00000070738	1815	1573	454	901	1425	1319
1523	ENSMUSG00000101942	0	0	0	0	0	1
1524	ENSMUSG00000103996	3	6	0	0	0	0
1525	ENSMUSG00000103591	0	8	0	3	3	3
1526	ENSMUSG00000005501	827	662	156	464	641	600
1527	ENSMUSG00000095942	0	0	0	0	0	0
1528	ENSMUSG00000084021	0	0	0	0	0	0
1529	ENSMUSG00000083478	0	0	0	0	0	0
1530	ENSMUSG00000118514	0	0	0	0	0	0
1531	ENSMUSG00000090165	0	0	0	0	0	0
1532	ENSMUSG00000092220	0	0	0	0	0	0
1533	ENSMUSG00000118583	0	0	0	0	0	0
1534	ENSMUSG00000090175	0	0	0	0	0	0
1535	ENSMUSG00000089675	0	0	0	0	0	0
1536	ENSMUSG00000090124	10	3	0	3	3	7
1537	ENSMUSG00000082837	0	0	0	0	0	0
1538	ENSMUSG00000090145	0	0	0	0	0	0
1539	ENSMUSG00000084195	0	0	0	0	0	0
1540	ENSMUSG00000081261	0	0	0	0	0	0
1541	ENSMUSG00000054545	5	0	0	2	0	0
1542	ENSMUSG00000081602	0	0	0	0	0	0
1543	ENSMUSG00000082513	0	0	0	0	0	0
1544	ENSMUSG00000082677	0	0	0	0	0	0
1545	ENSMUSG00000089943	0	0	0	0	0	0
1546	ENSMUSG00000118621	0	0	0	0	0	0
1547	ENSMUSG00000081488	0	0	0	0	0	0
1548	ENSMUSG00000083277	0	0	0	0	0	0
1549	ENSMUSG00000090171	0	0	0	0	0	0
1550	ENSMUSG00000081984	21	18	4	10	27	22
1551	ENSMUSG00000089960	0	0	0	0	0	0
1552	ENSMUSG00000079429	80	52	21	38	87	83
1553	ENSMUSG00000044783	2564	2288	702	1449	2316	2445
1554	ENSMUSG00000036251	16	23	5	0	16	15
1555	ENSMUSG00000085420	0	0	0	0	0	0
1556	ENSMUSG00000026295	1	0	1	0	2	0
1557	ENSMUSG00000099553	4	4	2	4	1	4
1558	ENSMUSG00000100908	0	0	0	2	0	0
1559	ENSMUSG00000062310	0	1	0	3	3	2
1560	ENSMUSG00000100798	0	0	3	0	0	0
1561	ENSMUSG00000104057	0	0	0	0	0	0
1562	ENSMUSG00000100367	0	0	0	0	0	0
1563	ENSMUSG00000049866	1775	1909	522	957	1677	2071
1564	ENSMUSG00000101736	3	0	4	2	1	1
1565	ENSMUSG00000097398	0	0	0	0	0	1
1566	ENSMUSG00000099848	0	0	0	0	0	0
1567	ENSMUSG00000101333	0	0	0	0	0	0
1568	ENSMUSG00000099378	0	0	0	0	0	0
1569	ENSMUSG00000099544	0	0	0	0	0	0
1570	ENSMUSG00000036206	503	451	103	221	485	443
1571	ENSMUSG00000102700	0	5	0	1	0	0
1572	ENSMUSG00000102083	0	0	0	0	0	0
1573	ENSMUSG00000101288	0	1	0	0	0	0
1574	ENSMUSG00000099938	0	3	0	0	1	1
1575	ENSMUSG00000055013	5495	4877	1363	2646	4800	4878
1576	ENSMUSG00000104114	2	0	0	0	5	2
1577	ENSMUSG00000088371	0	1	0	2	0	0
1578	ENSMUSG00000101662	0	1	0	1	0	1
1579	ENSMUSG00000102009	3	3	1	2	1	3
1580	ENSMUSG00000088775	0	0	1	0	0	0
1581	ENSMUSG00000103252	0	0	1	0	0	0
1582	ENSMUSG00000034486	2	3	0	0	2	0
1583	ENSMUSG00000092627	1	1	0	1	2	0
1584	ENSMUSG00000067081	31	40	15	16	48	58
1585	ENSMUSG00000026301	219	53	62	146	164	106
1586	ENSMUSG00000100850	2	0	0	2	2	3
1587	ENSMUSG00000044337	185	136	44	80	180	162
1588	ENSMUSG00000104087	0	0	0	1	0	0
1589	ENSMUSG00000101951	0	1	0	0	2	0
1590	ENSMUSG00000101028	0	3	0	0	0	0
1591	ENSMUSG00000098368	0	0	0	0	0	0
1592	ENSMUSG00000101997	0	0	0	0	0	4
1593	ENSMUSG00000103292	0	3	0	0	3	2
1594	ENSMUSG00000034432	1573	1692	462	919	1514	1749
1595	ENSMUSG00000056128	0	0	0	0	0	0
1596	ENSMUSG00000048126	131	144	34	63	119	115
1597	ENSMUSG00000103061	0	0	0	0	0	0
1598	ENSMUSG00000103978	0	0	0	0	0	0
1599	ENSMUSG00000026303	30	24	8	24	33	55
1600	ENSMUSG00000090550	0	0	0	0	0	0
1601	ENSMUSG00000026304	0	1	0	0	0	0
1602	ENSMUSG00000100791	0	0	0	0	0	0
1603	ENSMUSG00000026305	1042	946	226	494	921	991
1604	ENSMUSG00000070732	1	0	0	0	1	0
1605	ENSMUSG00000100018	0	0	0	0	1	0
1606	ENSMUSG00000034353	742	610	153	403	702	619
1607	ENSMUSG00000034343	854	878	235	500	902	917
1608	ENSMUSG00000083064	9	8	1	6	8	17
1609	ENSMUSG00000026307	381	312	80	207	309	328
1610	ENSMUSG00000090322	0	2	0	1	0	0
1611	ENSMUSG00000049515	9	2	6	6	4	15
1612	ENSMUSG00000026308	5	3	1	3	4	11
1613	ENSMUSG00000047443	0	3	0	3	3	1
1614	ENSMUSG00000026309	892	729	269	486	734	762
1615	ENSMUSG00000100253	2	0	0	1	0	0
1616	ENSMUSG00000067071	244	287	78	161	264	315
1617	ENSMUSG00000055866	1924	1291	367	1122	1413	1206
1618	ENSMUSG00000101911	0	0	0	0	0	0
1619	ENSMUSG00000100151	1	0	0	0	2	0
1620	ENSMUSG00000101958	0	0	0	0	0	0
1621	ENSMUSG00000034292	631	450	155	283	430	498
1622	ENSMUSG00000026311	1238	1145	317	663	1090	1231
1623	ENSMUSG00000101705	0	0	0	0	0	0
1624	ENSMUSG00000100980	25	36	2	6	15	15
1625	ENSMUSG00000007805	3	8	0	2	6	14
1626	ENSMUSG00000101414	0	0	0	1	0	0
1627	ENSMUSG00000102745	0	0	0	0	0	0
1628	ENSMUSG00000026313	1446	1261	417	693	1193	1240
1629	ENSMUSG00000103101	2	1	0	0	2	0
1630	ENSMUSG00000102565	0	2	0	1	0	0
1631	ENSMUSG00000101265	0	0	0	0	0	0
1632	ENSMUSG00000101522	0	0	0	0	0	0
1633	ENSMUSG00000026260	1874	1992	549	1093	1943	2421
1634	ENSMUSG00000098288	0	0	0	0	0	0
1635	ENSMUSG00000067064	0	0	0	0	0	0
1636	ENSMUSG00000057464	0	0	0	0	0	0
1637	ENSMUSG00000042849	0	0	0	0	0	0
1638	ENSMUSG00000058904	0	0	0	0	0	0
1639	ENSMUSG00000097001	0	0	0	0	0	0
1640	ENSMUSG00000099363	0	0	0	0	0	0
1641	ENSMUSG00000046300	0	0	0	0	0	0
1642	ENSMUSG00000107778	0	0	0	0	0	0
1643	ENSMUSG00000062497	0	0	0	0	0	0
1644	ENSMUSG00000108131	0	0	0	0	0	0
1645	ENSMUSG00000063583	0	0	0	0	0	0
1646	ENSMUSG00000061616	0	0	0	0	0	0
1647	ENSMUSG00000073616	478	459	126	248	461	446
1648	ENSMUSG00000044055	3	0	2	5	10	12
1649	ENSMUSG00000100546	0	1	1	0	0	0
1650	ENSMUSG00000099665	0	0	0	0	0	0
1651	ENSMUSG00000100781	0	2	0	0	1	0
1652	ENSMUSG00000034220	1889	1527	492	1038	1561	1517
1653	ENSMUSG00000101995	97	67	19	54	70	97
1654	ENSMUSG00000065470	10	0	3	2	8	1
1655	ENSMUSG00000034212	17	10	2	5	2	25
1656	ENSMUSG00000047067	298	377	92	238	319	362
1657	ENSMUSG00000097251	41	42	14	19	55	35
1658	ENSMUSG00000026269	897	696	205	465	681	763
1659	ENSMUSG00000100632	6	3	1	7	8	10
1660	ENSMUSG00000026270	566	551	148	359	578	629
1661	ENSMUSG00000026271	45	10	4	30	22	19
1662	ENSMUSG00000100021	4	0	0	0	0	3
1663	ENSMUSG00000045091	0	0	0	0	0	0
1664	ENSMUSG00000014602	39270	36718	10684	21032	37091	38838
1665	ENSMUSG00000101378	2	1	0	0	6	4
1666	ENSMUSG00000026272	0	0	0	0	0	0
1667	ENSMUSG00000034159	0	1	0	2	3	0
1668	ENSMUSG00000084989	550	91	109	344	252	321
1669	ENSMUSG00000047793	1072	537	153	539	655	490
1670	ENSMUSG00000098997	0	0	0	0	0	0
1671	ENSMUSG00000026273	273	225	66	151	253	313
1672	ENSMUSG00000101172	5	1	0	3	2	3
1673	ENSMUSG00000100351	5	3	0	0	1	1
1674	ENSMUSG00000026274	190	190	54	109	160	157
1675	ENSMUSG00000026275	1495	1440	431	778	1369	1655
1676	ENSMUSG00000106302	0	0	0	0	0	0
1677	ENSMUSG00000098689	0	0	0	1	0	3
1678	ENSMUSG00000064389	2	3	3	3	1	0
1679	ENSMUSG00000034107	52	40	17	34	23	82
1680	ENSMUSG00000034088	4643	3887	1202	2564	3973	4549
1681	ENSMUSG00000090489	7	7	2	8	5	6
1682	ENSMUSG00000026276	75	58	12	33	52	37
1683	ENSMUSG00000116048	0	0	0	0	0	0
1684	ENSMUSG00000034066	228	192	65	82	174	168
1685	ENSMUSG00000103854	0	0	0	0	0	2
1686	ENSMUSG00000026277	3770	3748	1021	2078	3513	3968
1687	ENSMUSG00000100927	2	3	1	0	0	1
1688	ENSMUSG00000026278	279	219	76	167	281	326
1689	ENSMUSG00000026279	315	322	98	189	289	335
1690	ENSMUSG00000101952	0	0	0	0	0	0
1691	ENSMUSG00000026280	1468	1446	393	822	1427	1344
1692	ENSMUSG00000026281	483	332	125	237	309	295
1693	ENSMUSG00000026283	435	375	118	220	381	489
1694	ENSMUSG00000088961	0	0	0	0	1	0
1695	ENSMUSG00000073609	260	245	71	164	266	258
1696	ENSMUSG00000094651	0	0	0	0	0	0
1697	ENSMUSG00000101660	1	0	0	1	0	0
1698	ENSMUSG00000093805	0	0	0	0	0	0
1699	ENSMUSG00000099624	10	1	0	0	5	1
1700	ENSMUSG00000073608	4	0	0	0	0	0
1701	ENSMUSG00000034000	302	257	65	143	228	246
1702	ENSMUSG00000026285	0	0	0	0	2	0
1703	ENSMUSG00000100990	0	0	0	0	0	0
1704	ENSMUSG00000100347	18	64	14	6	18	51
1705	ENSMUSG00000077413	0	0	0	0	0	0
1706	ENSMUSG00000100518	0	0	0	0	0	0
1707	ENSMUSG00000089310	0	0	0	0	0	0
1708	ENSMUSG00000099592	0	0	0	0	0	0
1709	ENSMUSG00000051185	615	559	148	314	584	591
1710	ENSMUSG00000103973	16	17	5	2	18	23
1711	ENSMUSG00000081051	624	651	208	438	697	702
1712	ENSMUSG00000040710	1040	979	252	465	943	882
1713	ENSMUSG00000103197	0	0	0	0	0	0
1714	ENSMUSG00000100777	0	0	0	0	0	0
1715	ENSMUSG00000102718	0	0	0	0	0	0
1716	ENSMUSG00000095955	0	0	0	0	0	0
1717	ENSMUSG00000100062	0	0	0	0	0	0
1718	ENSMUSG00000080345	0	0	0	0	0	0
1719	ENSMUSG00000096585	0	0	0	0	0	0
1720	ENSMUSG00000102658	0	0	0	0	0	0
1721	ENSMUSG00000100336	0	0	0	0	0	0
1722	ENSMUSG00000100589	0	0	0	0	0	0
1723	ENSMUSG00000095610	0	0	0	0	0	0
1724	ENSMUSG00000100362	1	0	0	0	0	0
1725	ENSMUSG00000077255	0	0	0	0	0	0
1726	ENSMUSG00000040693	81	68	9	28	58	92
1727	ENSMUSG00000097814	42	31	4	23	38	31
1728	ENSMUSG00000045463	0	0	0	0	0	0
1729	ENSMUSG00000097480	0	0	0	0	0	0
1730	ENSMUSG00000100454	2	7	1	0	0	3
1731	ENSMUSG00000044757	6	7	0	1	6	11
1732	ENSMUSG00000026331	0	0	0	0	0	0
1733	ENSMUSG00000100484	0	0	0	0	0	0
1734	ENSMUSG00000101348	0	1	0	0	0	1
1735	ENSMUSG00000103179	0	0	0	0	0	0
1736	ENSMUSG00000044768	540	478	146	288	521	523
1737	ENSMUSG00000118489	0	0	0	0	0	0
1738	ENSMUSG00000040648	1008	1030	250	480	925	863
1739	ENSMUSG00000026333	130	133	37	77	122	119
1740	ENSMUSG00000026335	6265	6707	1754	3601	5985	6269
1741	ENSMUSG00000104140	8	9	1	2	10	3
1742	ENSMUSG00000089169	0	0	0	0	0	0
1743	ENSMUSG00000089782	62	61	18	34	57	80
1744	ENSMUSG00000089706	85	129	37	56	95	75
1745	ENSMUSG00000096085	3	0	0	0	0	0
1746	ENSMUSG00000100182	1	1	0	0	0	0
1747	ENSMUSG00000100711	3	0	1	0	0	0
1748	ENSMUSG00000097608	0	0	0	0	0	0
1749	ENSMUSG00000099634	4	2	0	1	0	1
1750	ENSMUSG00000026336	0	0	0	0	0	0
1751	ENSMUSG00000089791	6	2	2	9	8	9
1752	ENSMUSG00000096193	0	0	0	0	0	0
1753	ENSMUSG00000100009	31	31	0	16	22	28
1754	ENSMUSG00000099686	3	1	1	5	4	0
1755	ENSMUSG00000087804	0	0	0	0	0	0
1756	ENSMUSG00000099453	0	0	0	0	0	0
1757	ENSMUSG00000067028	230	310	81	134	312	232
1758	ENSMUSG00000082431	6	1	2	3	5	3
1759	ENSMUSG00000104104	0	0	0	0	0	0
1760	ENSMUSG00000100662	0	0	0	0	0	0
1761	ENSMUSG00000087883	0	0	0	0	0	0
1762	ENSMUSG00000099835	6	4	0	2	6	21
1763	ENSMUSG00000100794	95	85	34	79	142	160
1764	ENSMUSG00000099427	0	0	0	0	0	0
1765	ENSMUSG00000099892	0	0	0	0	0	0
1766	ENSMUSG00000100977	0	0	0	0	0	0
1767	ENSMUSG00000077039	0	0	0	0	0	0
1768	ENSMUSG00000100684	0	0	0	0	0	0
1769	ENSMUSG00000100088	0	0	0	0	0	0
1770	ENSMUSG00000100222	2	4	1	6	10	7
1771	ENSMUSG00000100065	0	0	0	0	0	0
1772	ENSMUSG00000100349	0	0	0	0	0	0
1773	ENSMUSG00000099375	0	1	1	0	3	0
1774	ENSMUSG00000077295	0	0	0	0	0	0
1775	ENSMUSG00000099770	0	0	0	0	1	0
1776	ENSMUSG00000088510	0	0	0	0	0	0
1777	ENSMUSG00000101890	0	0	0	0	0	0
1778	ENSMUSG00000099989	0	0	0	0	0	0
1779	ENSMUSG00000087908	0	0	0	0	0	0
1780	ENSMUSG00000100955	0	0	0	0	0	6
1781	ENSMUSG00000088594	0	0	0	0	0	0
1782	ENSMUSG00000099469	0	0	0	0	0	0
1783	ENSMUSG00000102325	0	0	0	0	0	0
1784	ENSMUSG00000101297	0	0	0	0	0	0
1785	ENSMUSG00000100059	0	0	0	0	0	0
1786	ENSMUSG00000088161	0	0	0	0	0	0
1787	ENSMUSG00000099464	0	0	0	0	0	0
1788	ENSMUSG00000100935	0	0	0	0	0	0
1789	ENSMUSG00000099801	0	0	0	0	0	0
1790	ENSMUSG00000050840	457	327	98	208	392	355
1791	ENSMUSG00000103991	0	1	0	0	3	0
1792	ENSMUSG00000084704	0	0	0	0	0	0
1793	ENSMUSG00000103060	1	0	0	0	2	0
1794	ENSMUSG00000089866	0	0	0	0	0	0
1795	ENSMUSG00000099669	0	0	0	0	0	0
1796	ENSMUSG00000099702	0	0	0	0	1	0
1797	ENSMUSG00000047496	623	568	135	258	480	394
1798	ENSMUSG00000099582	0	0	0	0	0	0
1799	ENSMUSG00000097482	2	6	1	1	8	12
1800	ENSMUSG00000101214	1	0	0	0	0	0
1801	ENSMUSG00000067017	191	132	54	55	149	183
1802	ENSMUSG00000056536	605	484	132	287	523	516
1803	ENSMUSG00000100672	0	0	0	0	0	0
1804	ENSMUSG00000101219	3	2	2	0	3	1
1805	ENSMUSG00000076999	0	0	0	0	0	0
1806	ENSMUSG00000101656	0	0	0	0	0	0
1807	ENSMUSG00000026319	1877	1817	528	1001	1741	1648
1808	ENSMUSG00000104044	2	2	0	0	1	0
1809	ENSMUSG00000101330	0	0	1	0	1	3
1810	ENSMUSG00000026321	80	63	13	46	52	70
1811	ENSMUSG00000102690	0	0	0	0	0	0
1812	ENSMUSG00000089206	0	0	0	0	0	0
1813	ENSMUSG00000099448	0	0	0	0	0	0
1814	ENSMUSG00000099843	17	9	6	12	26	19
1815	ENSMUSG00000038866	652	524	141	376	523	659
1816	ENSMUSG00000102501	1	1	0	0	1	0
1817	ENSMUSG00000097612	3	4	3	2	0	4
1818	ENSMUSG00000101583	9	1	0	2	5	6
1819	ENSMUSG00000044340	2352	2159	541	1059	2280	1926
1820	ENSMUSG00000103291	4	0	0	0	2	0
1821	ENSMUSG00000100247	0	0	0	0	0	0
1822	ENSMUSG00000099604	0	0	0	0	0	0
1823	ENSMUSG00000057329	642	522	169	287	488	472
1824	ENSMUSG00000054006	0	0	0	0	0	0
1825	ENSMUSG00000098344	0	0	0	0	0	0
1826	ENSMUSG00000103348	0	0	0	0	0	0
1827	ENSMUSG00000009905	913	783	256	470	740	819
1828	ENSMUSG00000009907	1262	1059	332	706	1072	1141
1829	ENSMUSG00000067006	5	4	0	3	3	3
1830	ENSMUSG00000083613	0	0	0	0	0	0
1831	ENSMUSG00000059956	0	0	0	0	0	0
1832	ENSMUSG00000048775	0	0	0	0	0	0
1833	ENSMUSG00000084228	0	0	0	0	0	0
1834	ENSMUSG00000044594	0	0	0	0	0	0
1835	ENSMUSG00000058017	0	0	0	0	0	0
1836	ENSMUSG00000083884	0	0	0	0	0	0
1837	ENSMUSG00000073602	0	0	0	0	0	3
1838	ENSMUSG00000080729	0	0	0	0	0	0
1839	ENSMUSG00000081114	0	0	0	0	0	0
1840	ENSMUSG00000073601	0	0	0	0	0	0
1841	ENSMUSG00000084189	0	0	0	0	0	0
1842	ENSMUSG00000026327	25	11	1	3	20	6
1843	ENSMUSG00000087210	0	0	0	0	0	0
1844	ENSMUSG00000067001	1	1	0	1	0	0
1845	ENSMUSG00000089278	0	0	0	0	0	0
1846	ENSMUSG00000062345	1	0	0	0	0	0
1847	ENSMUSG00000092572	0	0	0	2	0	0
1848	ENSMUSG00000026315	7	0	6	8	10	15
1849	ENSMUSG00000086161	0	0	0	0	0	0
1850	ENSMUSG00000096241	0	0	0	0	0	0
1851	ENSMUSG00000077237	0	0	0	0	0	0
1852	ENSMUSG00000100457	0	0	0	0	0	0
1853	ENSMUSG00000101477	0	0	0	0	0	0
1854	ENSMUSG00000099484	0	0	0	0	0	0
1855	ENSMUSG00000100041	2	0	0	0	0	0
1856	ENSMUSG00000104478	0	0	0	0	0	0
1857	ENSMUSG00000101231	0	0	0	0	0	0
1858	ENSMUSG00000101097	0	0	0	0	0	0
1859	ENSMUSG00000100831	0	0	0	0	0	0
1860	ENSMUSG00000100884	0	0	0	0	0	0
1861	ENSMUSG00000089037	0	0	0	0	0	0
1862	ENSMUSG00000084741	0	0	0	0	0	0
1863	ENSMUSG00000100025	0	0	1	0	0	0
1864	ENSMUSG00000026312	558	556	144	297	517	529
1865	ENSMUSG00000100290	0	0	0	0	0	0
1866	ENSMUSG00000100758	0	0	0	0	0	0
1867	ENSMUSG00000099926	0	0	0	0	0	0
1868	ENSMUSG00000047216	220	216	44	79	219	208
1869	ENSMUSG00000102788	12	19	4	5	19	3
1870	ENSMUSG00000102160	13	14	1	0	2	2
1871	ENSMUSG00000101253	0	0	0	2	1	5
1872	ENSMUSG00000101846	0	0	0	1	1	0
1873	ENSMUSG00000100555	2	6	1	0	1	2
1874	ENSMUSG00000102728	0	0	0	0	2	0
1875	ENSMUSG00000038702	538	605	144	253	504	519
1876	ENSMUSG00000101875	0	0	0	0	0	0
1877	ENSMUSG00000099732	0	0	2	0	0	0
1878	ENSMUSG00000101220	0	0	0	0	0	0
1879	ENSMUSG00000100020	0	0	0	0	0	0
1880	ENSMUSG00000101054	14	25	6	5	12	17
1881	ENSMUSG00000088691	0	0	0	0	0	0
1882	ENSMUSG00000099884	0	0	0	0	0	0
1883	ENSMUSG00000100304	0	0	0	0	0	0
1884	ENSMUSG00000101453	0	0	0	0	0	0
1885	ENSMUSG00000102105	0	0	0	0	0	0
1886	ENSMUSG00000099943	0	0	0	0	0	0
1887	ENSMUSG00000084546	0	0	0	0	0	0
1888	ENSMUSG00000097648	47	29	1	26	28	15
1889	ENSMUSG00000101687	0	0	0	0	0	0
1890	ENSMUSG00000100515	40	11	5	9	19	17
1891	ENSMUSG00000070695	1074	1050	346	409	937	802
1892	ENSMUSG00000092948	0	0	0	0	0	0
1893	ENSMUSG00000102033	0	0	0	0	0	0
1894	ENSMUSG00000094429	0	0	0	0	0	3
1895	ENSMUSG00000101154	0	0	0	0	0	0
1896	ENSMUSG00000065865	0	0	0	0	0	0
1897	ENSMUSG00000098815	0	0	0	0	0	0
1898	ENSMUSG00000101573	0	0	0	0	0	0
1899	ENSMUSG00000107979	0	0	0	0	0	0
1900	ENSMUSG00000101373	0	0	0	0	0	0
1901	ENSMUSG00000099615	0	0	0	0	0	0
1902	ENSMUSG00000100265	0	0	0	0	0	0
1903	ENSMUSG00000100527	0	0	0	0	0	0
1904	ENSMUSG00000099571	0	0	0	0	0	0
1905	ENSMUSG00000101303	0	0	0	0	0	0
1906	ENSMUSG00000100305	0	0	0	0	0	0
1907	ENSMUSG00000099534	0	0	0	0	0	0
1908	ENSMUSG00000100886	0	0	0	0	0	0
1909	ENSMUSG00000101415	0	0	0	0	0	0
1910	ENSMUSG00000100617	0	0	0	0	0	0
1911	ENSMUSG00000100703	0	0	0	0	0	0
1912	ENSMUSG00000100177	0	0	0	0	0	0
1913	ENSMUSG00000101363	0	0	0	0	0	0
1914	ENSMUSG00000101590	0	0	0	0	0	0
1915	ENSMUSG00000102030	4	1	0	5	1	3
1916	ENSMUSG00000099870	0	0	0	0	0	0
1917	ENSMUSG00000026374	2473	2349	606	1484	2472	2433
1918	ENSMUSG00000026377	409	403	77	202	373	373
1919	ENSMUSG00000099936	0	0	0	0	0	0
1920	ENSMUSG00000064302	3773	3530	1035	1792	3476	3285
1921	ENSMUSG00000077257	0	0	0	0	0	0
1922	ENSMUSG00000107722	0	0	0	0	0	0
1923	ENSMUSG00000080542	0	0	0	0	0	0
1924	ENSMUSG00000100770	0	0	0	0	0	0
1925	ENSMUSG00000026380	61	31	10	34	50	53
1926	ENSMUSG00000089601	0	0	0	0	0	0
1927	ENSMUSG00000101624	0	0	0	0	0	0
1928	ENSMUSG00000088363	0	0	0	0	0	0
1929	ENSMUSG00000100040	0	0	0	0	0	0
1930	ENSMUSG00000048402	205	150	71	121	200	159
1931	ENSMUSG00000098273	0	0	0	0	0	0
1932	ENSMUSG00000097408	0	3	1	0	2	5
1933	ENSMUSG00000096939	0	0	0	0	0	0
1934	ENSMUSG00000100767	0	0	0	0	0	0
1935	ENSMUSG00000099860	0	0	0	0	0	0
1936	ENSMUSG00000101179	8	0	3	10	5	0
1937	ENSMUSG00000037035	140	87	44	62	118	108
1938	ENSMUSG00000004451	265	305	48	147	245	250
1939	ENSMUSG00000101437	0	5	0	0	3	0
1940	ENSMUSG00000098447	7	4	5	7	10	4
1941	ENSMUSG00000098923	392	389	132	207	314	411
1942	ENSMUSG00000101731	14	7	3	4	4	2
1943	ENSMUSG00000084505	0	0	0	0	0	0
1944	ENSMUSG00000026383	739	511	151	349	613	425
1945	ENSMUSG00000102687	0	0	0	0	0	0
1946	ENSMUSG00000026384	2097	1956	457	811	1850	1381
1947	ENSMUSG00000091876	0	0	1	0	0	1
1948	ENSMUSG00000103146	4	3	1	0	5	0
1949	ENSMUSG00000100436	0	0	0	0	0	0
1950	ENSMUSG00000090277	0	0	0	0	0	2
1951	ENSMUSG00000100042	0	0	0	0	0	0
1952	ENSMUSG00000100636	6	1	0	4	2	1
1953	ENSMUSG00000101224	8	4	1	0	4	2
1954	ENSMUSG00000036975	273	178	66	111	159	239
1955	ENSMUSG00000036962	58	23	17	49	38	46
1956	ENSMUSG00000092245	2	4	0	2	0	0
1957	ENSMUSG00000026387	85	19	20	52	36	36
1958	ENSMUSG00000050777	12	20	4	8	7	19
1959	ENSMUSG00000026385	3909	2819	901	2341	3743	3227
1960	ENSMUSG00000026388	15	21	7	8	19	12
1961	ENSMUSG00000026389	145	173	32	79	137	110
1962	ENSMUSG00000036907	198	276	68	81	176	224
1963	ENSMUSG00000101275	0	0	0	0	0	0
1964	ENSMUSG00000026390	0	0	0	0	0	0
1965	ENSMUSG00000058665	3	0	1	1	4	5
1966	ENSMUSG00000099957	0	0	0	0	0	0
1967	ENSMUSG00000101386	0	0	0	0	0	0
1968	ENSMUSG00000101922	0	0	0	0	0	0
1969	ENSMUSG00000100761	0	0	0	0	0	0
1970	ENSMUSG00000099336	0	0	0	0	0	0
1971	ENSMUSG00000100979	0	0	0	0	0	0
1972	ENSMUSG00000102360	0	0	0	0	0	0
1973	ENSMUSG00000097881	38	50	7	11	34	36
1974	ENSMUSG00000101700	0	0	2	0	0	0
1975	ENSMUSG00000104332	0	0	0	0	0	0
1976	ENSMUSG00000003721	840	863	266	569	870	906
1977	ENSMUSG00000104253	17	29	7	7	25	24
1978	ENSMUSG00000101791	0	2	0	2	0	0
1979	ENSMUSG00000026339	920	770	263	506	825	819
1980	ENSMUSG00000085857	0	5	0	0	4	0
1981	ENSMUSG00000083582	0	0	0	1	0	0
1982	ENSMUSG00000050534	41	31	15	68	41	10
1983	ENSMUSG00000081130	0	0	0	0	0	0
1984	ENSMUSG00000001674	470	352	139	238	427	452
1985	ENSMUSG00000102006	0	0	0	0	0	0
1986	ENSMUSG00000102488	0	0	0	0	0	0
1987	ENSMUSG00000083584	0	0	0	0	0	0
1988	ENSMUSG00000100913	0	0	0	0	0	0
1989	ENSMUSG00000080410	0	0	0	0	0	0
1990	ENSMUSG00000099960	0	0	0	0	0	0
1991	ENSMUSG00000089274	0	0	0	0	0	0
1992	ENSMUSG00000103263	0	0	0	0	0	0
1993	ENSMUSG00000089190	0	0	0	0	0	0
1994	ENSMUSG00000099451	0	0	0	0	0	0
1995	ENSMUSG00000104180	0	0	0	0	0	0
1996	ENSMUSG00000100762	0	0	0	0	0	0
1997	ENSMUSG00000100405	0	0	0	0	0	0
1998	ENSMUSG00000100525	0	0	0	0	0	0
1999	ENSMUSG00000101495	0	0	0	0	0	0
[truncated: 53,488 more rows]

## Sheet: SCN DESeq Results
	Gene	baseMean	log2FoldChange	lfcSE	stat	pvalue	padj	chromosome_name	start_position	end_position	gene_biotype	mgi_symbol
1	ENSMUSG00000000001	428.741	0.0241491	0.0937441	-0.257607	0.79671	0.97395	3	108014596	108053462	protein_coding	Gnai3
2	ENSMUSG00000000003	0	NA	NA	NA	NA	NA	X	76881507	76897229	protein_coding	Pbsn
3	ENSMUSG00000000028	26.6892	0.0410096	0.341214	-0.120188	0.904335	NA	16	18599197	18630737	protein_coding	Cdc45
4	ENSMUSG00000000031	2.10235	1.01666	1.15248	-0.882149	0.377696	NA	7	142129262	142133957	lncRNA	H19
5	ENSMUSG00000000037	33.0773	0.242508	0.315053	-0.769738	0.441456	NA	X	159865521	160041209	protein_coding	Scml2
6	ENSMUSG00000000049	2.84239	-0.855386	1.0269	0.832978	0.404857	NA	11	108234180	108305222	protein_coding	Apoh
7	ENSMUSG00000000056	546.821	0.0763004	0.115394	-0.661218	0.508472	0.907112	11	121128079	121146682	protein_coding	Narf
8	ENSMUSG00000000058	209.638	-0.0316724	0.141917	0.223176	0.823399	0.981048	6	17281184	17289114	protein_coding	Cav2
9	ENSMUSG00000000078	414.038	-0.0125855	0.0995442	0.126432	0.89939	0.987055	13	5911481	5920393	protein_coding	Klf6
10	ENSMUSG00000000085	617.01	-0.0936207	0.100484	0.931698	0.351492	0.870226	4	120262478	120387383	protein_coding	Scmh1
11	ENSMUSG00000000088	407.492	-0.127891	0.0999767	1.27921	0.200824	0.805358	9	57428557	57439709	protein_coding	Cox5a
12	ENSMUSG00000000093	16.9353	-0.27701	0.399986	0.692549	0.488593	NA	11	85723377	85732774	protein_coding	Tbx2
13	ENSMUSG00000000094	3.27078	-4.15487	1.58166	2.62691	0.00861633	NA	11	85777248	85806923	protein_coding	Tbx4
14	ENSMUSG00000000103	0	NA	NA	NA	NA	NA	Y	2106015	2170409	protein_coding	Zfy2
15	ENSMUSG00000000120	23.5358	-0.627435	0.418984	1.49752	0.134259	NA	11	95459644	95478561	protein_coding	Ngfr
16	ENSMUSG00000000125	91.6165	-0.124641	0.228216	0.546153	0.584961	0.927302	11	103664976	103708783	protein_coding	Wnt3
17	ENSMUSG00000000126	23.6922	-0.156152	0.367963	0.424369	0.671296	NA	11	59197754	59224378	protein_coding	Wnt9a
18	ENSMUSG00000000127	233.378	-0.0852819	0.133821	0.637285	0.523939	0.909109	17	64170057	64446491	protein_coding	Fer
19	ENSMUSG00000000131	1820.9	-0.0418684	0.0686536	0.609851	0.541961	0.914031	7	125700887	125799673	protein_coding	Xpo6
20	ENSMUSG00000000134	615.576	-0.0507412	0.085541	0.593179	0.553061	0.917355	X	7628799	7641441	protein_coding	Tfe3
21	ENSMUSG00000000142	435.296	-0.0858966	0.0932051	0.921587	0.356744	0.872843	11	108811175	108841609	protein_coding	Axin2
22	ENSMUSG00000000148	333.613	0.0415716	0.126096	-0.329683	0.741639	0.964094	5	140690766	140705134	protein_coding	Brat1
23	ENSMUSG00000000149	1213.64	-0.143778	0.104104	1.38109	0.16725	0.780037	5	140744163	140816186	protein_coding	Gna12
24	ENSMUSG00000000154	7.34929	-0.206209	0.674123	0.305892	0.759687	NA	7	143027473	143053071	protein_coding	Slc22a18
25	ENSMUSG00000000157	1.46055	-0.835418	1.34139	0.622801	0.533415	NA	16	96223488	96244819	protein_coding	Itgb2l
26	ENSMUSG00000000159	1.64593	-3.47852	1.69437	2.05299	0.0400734	NA	16	96162868	96223321	protein_coding	Igsf5
27	ENSMUSG00000000167	64.7152	0.19557	0.330835	-0.59114	0.554426	NA	9	50528621	50536300	protein_coding	Pih1d2
28	ENSMUSG00000000168	1211.92	0.0080021	0.0771489	-0.103723	0.917389	0.989277	9	50545933	50571080	protein_coding	Dlat
29	ENSMUSG00000000171	884.373	0.10551	0.0942532	-1.11943	0.262955	0.845591	9	50507657	50515112	protein_coding	Sdhd
30	ENSMUSG00000000182	11.3079	-0.737359	0.594252	1.24082	0.214672	NA	6	127049865	127058371	protein_coding	Fgf23
31	ENSMUSG00000000183	0	NA	NA	NA	NA	NA	6	126992549	127005150	protein_coding	Fgf6
32	ENSMUSG00000000184	214.026	0.0487842	0.194539	-0.250768	0.801993	0.975925	6	127102125	127129156	protein_coding	Ccnd2
33	ENSMUSG00000000194	871.573	-0.00258168	0.0722691	0.0357232	0.971503	0.995795	2	31042328	31108787	protein_coding	Gpr107
34	ENSMUSG00000000197	3369.69	0.000861944	0.059451	-0.0144984	0.988432	0.997801	14	123514046	123864556	protein_coding	Nalcn
35	ENSMUSG00000000202	147.485	-0.0904468	0.152055	0.594829	0.551958	0.916612	11	114682043	114686771	protein_coding	Btbd17
36	ENSMUSG00000000204	0	NA	NA	NA	NA	NA	11	83066012	83081042	protein_coding	Slfn4
37	ENSMUSG00000000214	429.754	-0.365311	0.328639	1.11159	0.266317	0.8457	7	142446489	142484865	protein_coding	Th
38	ENSMUSG00000000215	0.228268	-15.5136	195.481	0.0793613	0.936745	NA	7	142232393	142297118	protein_coding	Ins2
39	ENSMUSG00000000216	0.630186	17.4068	265.857	-0.0654743	0.947796	NA	7	121333702	121367698	protein_coding	Scnn1g
40	ENSMUSG00000000223	815.417	-0.224744	0.0906586	2.47901	0.0131748	0.399	X	133305300	133357322	protein_coding	Drp2
41	ENSMUSG00000000244	8.29833	-0.640603	0.620532	1.03234	0.301911	NA	7	142558783	142573381	protein_coding	Tspan32
42	ENSMUSG00000000247	68.833	-0.313356	0.223775	1.40032	0.161417	0.776368	2	38229293	38259745	protein_coding	Lhx2
43	ENSMUSG00000000248	0	NA	NA	NA	NA	NA	6	128911344	128961670	protein_coding	Clec2g
44	ENSMUSG00000000253	381.515	0.175047	0.139327	-1.25637	0.208982	0.808866	13	45660920	45707276	protein_coding	Gmpr
45	ENSMUSG00000000263	161.404	-0.0155471	0.158914	0.0978338	0.922064	0.991106	11	55405064	55499024	protein_coding	Glra1
46	ENSMUSG00000000266	884.109	-0.0573363	0.0810443	0.707468	0.479276	0.901769	X	139565348	139668464	protein_coding	Mid2
47	ENSMUSG00000000275	135.727	0.159172	0.16127	-0.986994	0.323646	0.863892	11	88890202	88911119	protein_coding	Trim25
48	ENSMUSG00000000276	1299.45	-0.132018	0.0796851	1.65675	0.0975709	0.699301	11	88926005	88957676	protein_coding	Dgke
49	ENSMUSG00000000278	337.048	0.060659	0.105781	-0.573439	0.566348	0.922024	11	88814846	88846291	protein_coding	Scpep1
50	ENSMUSG00000000282	741.323	0.153124	0.0887485	-1.72538	0.0844598	0.676945	11	74721746	74736551	protein_coding	Mnt
51	ENSMUSG00000000290	69.6077	0.279889	0.222835	-1.25604	0.209102	0.80901	10	77366086	77401542	protein_coding	Itgb2
52	ENSMUSG00000000295	179.845	0.261309	0.152762	-1.71057	0.0871609	0.679056	10	31189379	31204200	protein_coding	Hddc2
53	ENSMUSG00000000296	368.955	0.184415	0.170652	-1.08065	0.279853	0.851223	10	31208372	31321954	protein_coding	Tpd52l1
54	ENSMUSG00000000301	34.3401	-0.204677	0.294052	0.696058	0.486392	NA	11	59861440	59937315	protein_coding	Pemt
55	ENSMUSG00000000303	4.1718	0.638174	0.775319	-0.823112	0.410444	NA	8	107329983	107396878	protein_coding	Cdh1
56	ENSMUSG00000000305	979.28	-0.0453589	0.0895929	0.506278	0.612661	0.933997	2	179084224	179541166	protein_coding	Cdh4
57	ENSMUSG00000000308	2946.99	0.11815	0.100404	-1.17675	0.239295	0.830896	2	121188195	121194218	protein_coding	Ckmt1
58	ENSMUSG00000000317	24.4313	0.526495	0.393378	-1.33839	0.180769	NA	11	70114954	70120624	protein_coding	Bcl6b
59	ENSMUSG00000000318	2.21965	-1.61975	1.0964	1.47734	0.139583	NA	11	70047023	70061660	protein_coding	Clec10a
60	ENSMUSG00000000320	9.61819	-0.17039	0.533689	0.319268	0.749523	NA	11	70132283	70146179	protein_coding	Alox12
61	ENSMUSG00000000326	844.628	0.099997	0.0774696	-1.29079	0.196777	0.803743	16	18225636	18245602	protein_coding	Comt
62	ENSMUSG00000000339	475.275	0.153332	0.0973086	-1.57573	0.115088	0.718956	3	116282612	116301857	protein_coding	Rtca
63	ENSMUSG00000000340	294.434	-0.00585861	0.123289	0.0475192	0.962099	0.994944	3	116306719	116343630	protein_coding	Dbt
64	ENSMUSG00000000346	1452.99	0.103067	0.0652981	-1.57841	0.114471	0.717998	15	100513230	100518642	protein_coding	Dazap2
65	ENSMUSG00000000355	438.157	-0.0181427	0.120058	0.151117	0.879884	0.984962	X	37689455	37702303	protein_coding	Mcts1
66	ENSMUSG00000000359	7.66992	0.458757	0.636117	-0.721183	0.470797	NA	2	152468871	152477118	protein_coding	Rem1
67	ENSMUSG00000000365	7.67839	-0.391905	0.582541	0.672752	0.501105	NA	14	56640038	56762489	protein_coding	Rnf17
68	ENSMUSG00000000374	1789.36	0.0517091	0.0623465	-0.829383	0.406888	0.88336	10	78022559	78080475	protein_coding	Trappc10
69	ENSMUSG00000000378	406.952	0.0623774	0.0977389	-0.638204	0.523341	0.909109	11	6496887	6546744	protein_coding	Ccm2
70	ENSMUSG00000000381	0.858477	0.759392	1.63618	-0.464124	0.642559	NA	11	6585482	6588637	protein_coding	Wap
71	ENSMUSG00000000384	434.392	0.0759994	0.0932282	-0.815197	0.414959	0.885869	11	6565598	6576067	protein_coding	Tbrg4
72	ENSMUSG00000000385	4.2006	1.4952	0.991123	-1.50859	0.131404	NA	16	97365882	97412395	protein_coding	Tmprss2
73	ENSMUSG00000000386	2.87563	0.103149	0.928254	-0.111121	0.91152	NA	16	97248235	97264107	protein_coding	Mx1
74	ENSMUSG00000000392	4.93724	0.936375	0.777758	-1.20394	0.228612	NA	2	62331287	62404419	protein_coding	Fap
75	ENSMUSG00000000394	0.789041	-0.548995	1.52546	0.359887	0.718931	NA	2	62304874	62313994	protein_coding	Gcg
76	ENSMUSG00000000399	1131.48	0.201235	0.0867936	-2.31854	0.0204199	0.441708	6	126798684	126826099	protein_coding	Ndufa9
77	ENSMUSG00000000402	58.4161	0.0431399	0.260802	-0.165412	0.86862	NA	X	165306003	165368716	protein_coding	Egfl6
78	ENSMUSG00000000409	59.3937	0.783791	0.316397	-2.47724	0.0132403	NA	4	129442137	129467434	protein_coding	Lck
79	ENSMUSG00000000411	3.63328	0.558669	0.920974	-0.606607	0.544112	NA	4	129382807	129384815	protein_coding	Tssk3
80	ENSMUSG00000000416	625.148	-0.134176	0.0838053	1.60105	0.109367	0.716457	6	18366477	18514842	protein_coding	Cttnbp2
81	ENSMUSG00000000420	1025.42	0.0158646	0.0711318	-0.223031	0.823512	0.98106	18	24338401	24419875	protein_coding	Galnt1
82	ENSMUSG00000000435	0	NA	NA	NA	NA	NA	10	107318769	107321995	protein_coding	Myf5
83	ENSMUSG00000000439	368.58	0.0127626	0.105052	-0.121488	0.903304	0.987055	6	115578863	115599585	protein_coding	Mkrn2
84	ENSMUSG00000000440	8.46872	-0.471014	0.566761	0.831061	0.405939	NA	6	115337912	115467360	protein_coding	Pparg
85	ENSMUSG00000000441	487.76	0.0890872	0.102637	-0.867985	0.385403	0.879539	6	115595028	115653596	protein_coding	Raf1
86	ENSMUSG00000000486	20.9917	0.238765	0.384824	-0.620452	0.53496	NA	7	126813619	126832302	protein_coding	Septin1
87	ENSMUSG00000000489	122.614	0.20034	0.174026	-1.15121	0.249648	0.839422	15	79880075	79899178	protein_coding	Pdgfb
88	ENSMUSG00000000530	112.74	0.238961	0.211594	-1.12934	0.258755	0.842725	15	101026403	101043217	protein_coding	Acvrl1
89	ENSMUSG00000000531	70.056	0.134197	0.221665	-0.605406	0.54491	0.914968	15	101122069	101130637	protein_coding	Tamalin
90	ENSMUSG00000000532	1868.04	0.0203343	0.0785511	-0.258867	0.795738	0.973746	15	101071948	101111565	protein_coding	Acvr1b
91	ENSMUSG00000000538	4337.97	0.0362574	0.0626345	-0.578873	0.562675	0.92114	11	60117540	60243731	protein_coding	Tom1l2
92	ENSMUSG00000000544	1.48705	-0.85377	1.54275	0.553407	0.579985	NA	1	165957807	165994079	protein_coding	Gpa33
93	ENSMUSG00000000552	1007.34	-0.0441652	0.0691158	0.639003	0.522821	0.908825	15	103222322	103248520	protein_coding	Zfp385a
94	ENSMUSG00000000555	22.1584	0.0610738	0.411463	-0.148431	0.882003	NA	15	103252713	103275190	protein_coding	Itga5
95	ENSMUSG00000000560	2474.52	-0.0568698	0.086628	0.656483	0.511513	0.907205	5	71114940	71253192	protein_coding	Gabra2
96	ENSMUSG00000000561	590.616	-0.144776	0.0842457	1.71849	0.0857064	0.677238	3	105866685	105877353	protein_coding	Wdr77
97	ENSMUSG00000000562	6.48286	1.30542	0.808912	-1.61379	0.106573	NA	3	105778174	105816242	protein_coding	Adora3
98	ENSMUSG00000000563	2703.68	0.101159	0.068863	-1.46898	0.141837	0.755405	3	105850014	105867415	protein_coding	Atp5pb
99	ENSMUSG00000000567	586.049	0.227154	0.27103	-0.838113	0.401967	0.88333	11	112673050	112678586	protein_coding	Sox9
100	ENSMUSG00000000568	2853.13	-0.131141	0.0743137	1.7647	0.0776141	0.668586	5	100103794	100126797	protein_coding	Hnrnpd
101	ENSMUSG00000000579	80.0682	0.37759	0.237384	-1.59063	0.111693	0.716796	17	6869070	6877173	protein_coding	Dynlt1c
102	ENSMUSG00000000581	635.437	0.0158813	0.0925034	-0.171683	0.863687	0.984112	11	17207579	17219176	protein_coding	C1d
103	ENSMUSG00000000594	1107.15	-0.0144688	0.0757573	0.190989	0.848534	0.984112	11	54988941	55003855	protein_coding	Gm2a
104	ENSMUSG00000000600	848.081	-0.0644591	0.0817255	0.788727	0.430272	0.88836	5	3853184	3895564	protein_coding	Krit1
105	ENSMUSG00000000605	1971.23	-0.0155315	0.0614987	0.25255	0.800616	0.975366	7	7285308	7303850	protein_coding	Clcn4
106	ENSMUSG00000000606	0	NA	NA	NA	NA	NA	14	51648277	51658178	protein_coding	Vmn2r88
107	ENSMUSG00000000617	0	NA	NA	NA	NA	NA	11	50741512	50757035	protein_coding	Grm6
108	ENSMUSG00000000627	860.204	-0.0298976	0.0783524	0.381579	0.702774	0.95204	6	82888866	82916750	protein_coding	Sema4f
109	ENSMUSG00000000628	85.4138	0.0376753	0.221869	-0.169809	0.865161	0.984112	6	82702006	82751435	protein_coding	Hk2
110	ENSMUSG00000000631	2534.5	0.0111886	0.0652335	-0.171516	0.863818	0.984112	11	77654072	77756806	protein_coding	Myo18a
111	ENSMUSG00000000632	1380.64	-0.186853	0.0880195	2.12286	0.0337654	0.517037	11	77821626	77869874	protein_coding	Sez6
112	ENSMUSG00000000673	8.80826	0.544216	0.5388	-1.01005	0.31247	NA	17	84138585	84155392	protein_coding	Haao
113	ENSMUSG00000000682	14.8761	-0.238685	0.486952	0.490163	0.624019	NA	4	133809759	133822393	protein_coding	Cd52
114	ENSMUSG00000000686	8.49538	-0.65847	0.554145	1.18826	0.23473	NA	11	77405947	77429433	protein_coding	Abhd15
115	ENSMUSG00000000690	0	NA	NA	NA	NA	NA	11	96183302	96192395	protein_coding	Hoxb6
116	ENSMUSG00000000693	100.058	0.444582	0.185502	-2.39665	0.0165459	0.423654	6	83011154	83029543	protein_coding	Loxl3
117	ENSMUSG00000000701	0	NA	NA	NA	NA	NA	12	105142603	105147404	protein_coding	Tcl1b5
118	ENSMUSG00000000706	10.895	0.761287	0.596881	-1.27544	0.202153	NA	13	23641162	23650071	protein_coding	Btn1a1
119	ENSMUSG00000000708	341.85	-0.0169439	0.134442	0.126032	0.899707	0.987055	17	53873889	53979748	protein_coding	Kat2b
120	ENSMUSG00000000711	2533.71	0.0589778	0.0598333	-0.985702	0.324279	0.863892	10	128513044	128532133	protein_coding	Rab5b
121	ENSMUSG00000000724	0.604657	1.82592	1.84227	-0.991124	0.321625	NA	11	77609441	77616109	protein_coding	Cryba1
122	ENSMUSG00000000730	4.09516	-0.361354	0.918329	0.393491	0.693957	NA	10	77877781	77899456	protein_coding	Dnmt3l
123	ENSMUSG00000000731	2.59118	-0.173081	1.34378	0.128801	0.897515	NA	10	77865856	77879444	protein_coding	Aire
124	ENSMUSG00000000732	157.455	0.147403	0.150276	-0.980881	0.326652	0.86495	10	77905136	77919747	protein_coding	Icosl
125	ENSMUSG00000000738	634.263	0.0611213	0.0871267	-0.701522	0.482978	0.902323	8	123789681	123824499	protein_coding	Spg7
126	ENSMUSG00000000739	1.90756	-0.00318508	1.21791	0.0026152	0.997913	NA	8	123866931	123885054	protein_coding	Sult5a1
127	ENSMUSG00000000740	1965.86	0.168112	0.0704043	-2.38782	0.0169488	0.425662	8	123829089	123831983	protein_coding	Rpl13
128	ENSMUSG00000000743	942.433	0.101858	0.085481	-1.19159	0.233423	0.826076	8	123931003	123939502	protein_coding	Chmp1a
129	ENSMUSG00000000751	763.036	0.0611346	0.0829032	-0.737422	0.460866	0.899006	11	75188992	75239150	protein_coding	Rpa1
130	ENSMUSG00000000753	190.958	0.0276505	0.156706	-0.176448	0.859942	0.984112	11	75300595	75313527	protein_coding	Serpinf1
131	ENSMUSG00000000759	1027.24	-0.00212504	0.0740104	0.0287127	0.977094	0.99624	8	12664277	12722248	protein_coding	Tubgcp3
132	ENSMUSG00000000766	106.561	-0.436511	0.21987	1.98531	0.0471094	0.579123	10	6708506	6988198	protein_coding	Oprm1
133	ENSMUSG00000000776	266.737	0.118467	0.116307	-1.01857	0.308408	0.863707	14	70676197	70680887	protein_coding	Polr3d
134	ENSMUSG00000000782	22.2237	-0.222141	0.384291	0.578055	0.563227	NA	11	52143198	52174158	protein_coding	Tcf7
135	ENSMUSG00000000787	5097.32	-0.285261	0.195391	1.45995	0.144303	0.761108	X	13147209	13160291	protein_coding	Ddx3x
136	ENSMUSG00000000791	9.16478	0.705975	0.54027	-1.30671	0.191312	NA	8	71261093	71274068	protein_coding	Il12rb1
137	ENSMUSG00000000792	346.933	0.242432	0.188996	-1.28274	0.199585	0.805358	8	71335533	71345401	protein_coding	Slc5a5
138	ENSMUSG00000000794	830.511	-0.229525	0.0759707	3.02123	0.00251749	0.198362	3	89427471	89582439	protein_coding	Kcnn3
139	ENSMUSG00000000804	2278.22	-0.0882984	0.0678638	1.30111	0.19322	0.801049	11	84875268	85030987	protein_coding	Usp32
140	ENSMUSG00000000805	104.543	0.284968	0.203616	-1.39953	0.161653	0.776368	11	84848612	84856870	protein_coding	Car4
141	ENSMUSG00000000811	145.95	0.00910235	0.155135	-0.0586738	0.953212	0.994189	6	89620970	89652511	protein_coding	Txnrd3
142	ENSMUSG00000000817	4.2223	-2.16656	0.968714	2.23653	0.0253172	NA	1	161608258	161616064	protein_coding	Fasl
143	ENSMUSG00000000823	1349.35	-0.0371471	0.104197	0.356509	0.72146	0.959149	2	181223896	181234596	protein_coding	Zfp512b
144	ENSMUSG00000000826	5821.85	-0.00858344	0.0596349	0.143933	0.885553	0.985582	2	181162278	181196926	protein_coding	Dnajc5
145	ENSMUSG00000000827	758.324	0.109735	0.0756793	-1.45	0.147058	0.766466	2	181138935	181159759	protein_coding	Tpd52l2
146	ENSMUSG00000000838	544.847	-0.010889	0.0978707	0.111259	0.911411	0.987849	X	67722147	67761569	protein_coding	Fmr1
147	ENSMUSG00000000861	323.58	-0.0783342	0.116298	0.673563	0.500589	0.906097	11	24028056	24124123	protein_coding	Bcl11a
148	ENSMUSG00000000869	219.969	-0.0337556	0.127175	0.265426	0.790681	0.971786	11	53493809	53509496	protein_coding	Il4
149	ENSMUSG00000000876	164.889	0.0360428	0.179248	-0.201078	0.840637	0.98365	2	154427678	154445628	protein_coding	Pxmp4
150	ENSMUSG00000000881	1662.16	0.0194819	0.0852963	-0.228403	0.819333	0.979771	X	99811328	99862016	protein_coding	Dlg3
151	ENSMUSG00000000884	44.0948	-0.358742	0.266124	1.34802	0.177651	NA	16	18317463	18385429	protein_coding	Gnb1l
152	ENSMUSG00000000889	1.42556	-1.56904	1.48004	1.06013	0.289085	NA	2	27055245	27073212	protein_coding	Dbh
153	ENSMUSG00000000901	79.4085	-0.00371964	0.236359	0.0157373	0.987444	0.997707	10	75759056	75772330	protein_coding	Mmp11
154	ENSMUSG00000000902	878.951	-0.023673	0.0763739	0.309962	0.75659	0.96777	10	75732603	75757451	protein_coding	Smarcb1
155	ENSMUSG00000000903	1.89179	1.68715	1.29385	-1.30397	0.192244	NA	10	75778891	75785491	protein_coding	Vpreb3
156	ENSMUSG00000000915	1317.5	-0.0948723	0.084	1.12943	0.258716	0.842725	5	124111691	124143621	protein_coding	Hip1r
157	ENSMUSG00000000916	163.542	-0.142532	0.161156	0.884438	0.37646	0.877912	5	135398807	135405659	protein_coding	Nsun5
158	ENSMUSG00000000934	273.383	0.0466137	0.115165	-0.404757	0.685656	0.94774	15	75528884	75550649	protein_coding	Top1mt
159	ENSMUSG00000000938	0	NA	NA	NA	NA	NA	6	52208177	52217834	protein_coding	Hoxa10
160	ENSMUSG00000000942	0	NA	NA	NA	NA	NA	6	52166651	52168733	protein_coding	Hoxa4
161	ENSMUSG00000000948	229.702	-0.392809	0.174893	2.246	0.024704	0.467633	7	59623897	59654812	protein_coding	Gm38393
162	ENSMUSG00000000957	278.335	-0.0847398	0.187634	0.451622	0.651541	0.94127	14	54669069	54682821	protein_coding	Mmp14
163	ENSMUSG00000000958	37.1915	0.000630199	0.309535	-0.00203596	0.998376	NA	14	54606899	54655237	protein_coding	Slc7a7
164	ENSMUSG00000000959	678.842	0.116472	0.0827826	-1.40696	0.159439	0.776013	14	54598291	54607130	protein_coding	Oxa1l
165	ENSMUSG00000000976	511.842	-0.00810265	0.0890983	0.0909405	0.92754	0.992147	11	83644522	83674580	protein_coding	Heatr6
166	ENSMUSG00000000982	1.72345	-0.69718	1.29842	0.536946	0.591305	NA	11	83538670	83540181	protein_coding	Ccl3
167	ENSMUSG00000000983	4.87976	-0.328668	0.82679	0.397523	0.690982	NA	11	83599841	83602174	protein_coding	Wfdc18
168	ENSMUSG00000001014	0	NA	NA	NA	NA	NA	9	20940669	20941891	protein_coding	Icam4
169	ENSMUSG00000001016	1144.31	0.0303939	0.0724975	-0.41924	0.675041	0.945908	3	90383433	90395686	protein_coding	Ilf2
170	ENSMUSG00000001017	1621.19	-0.00421646	0.0657498	0.0641288	0.948868	0.993498	3	90406263	90416805	protein_coding	Chtop
171	ENSMUSG00000001018	686.261	0.0230218	0.0826985	-0.278382	0.780719	0.970457	3	90395333	90398340	protein_coding	Snapin
172	ENSMUSG00000001020	0	NA	NA	NA	NA	NA	3	90511078	90513352	protein_coding	S100a4
173	ENSMUSG00000001021	1.78607	-2.51815	1.36448	1.8455	0.0649647	NA	3	90491966	90510009	protein_coding	S100a3
174	ENSMUSG00000001023	0	NA	NA	NA	NA	NA	3	90515830	90519087	protein_coding	S100a5
175	ENSMUSG00000001025	91.3664	0.0535229	0.212656	-0.251688	0.801282	0.975627	3	90520189	90531488	protein_coding	S100a6
176	ENSMUSG00000001027	1.95194	-0.216121	1.26729	0.170538	0.864587	NA	11	106209418	106244114	protein_coding	Scn4a
177	ENSMUSG00000001029	14.3808	0.0551843	0.454709	-0.121362	0.903404	NA	11	106268482	106278901	protein_coding	Icam2
178	ENSMUSG00000001034	280.334	-0.0168366	0.145874	0.115419	0.908113	0.987251	11	61379638	61385232	protein_coding	Mapk7
179	ENSMUSG00000001036	1532.63	-0.0473791	0.0691108	0.685552	0.492995	0.904787	11	61408075	61470513	protein_coding	Epn2
180	ENSMUSG00000001039	246.216	0.074182	0.119957	-0.618407	0.536307	0.913201	11	61395970	61403757	protein_coding	B9d1
181	ENSMUSG00000001052	1419.14	-0.140161	0.0714722	1.96106	0.0498716	0.589573	3	129776408	129855202	protein_coding	Sec24b
182	ENSMUSG00000001053	86.1025	0.26377	0.243689	-1.0824	0.279074	0.851223	11	51533890	51541669	protein_coding	N4bp3
183	ENSMUSG00000001054	329.206	0.0760077	0.117614	-0.646249	0.518118	0.908825	11	51514498	51526723	protein_coding	Rmnd5b
184	ENSMUSG00000001056	148.914	-0.0786832	0.156512	0.50273	0.615154	0.934638	11	51510562	51514541	protein_coding	Nhp2
185	ENSMUSG00000001062	569.17	-0.0638583	0.10504	0.607944	0.543225	0.914427	8	123969095	123981087	protein_coding	Vps9d1
186	ENSMUSG00000001065	238.662	0.0201231	0.148788	-0.135247	0.892417	0.986392	8	123980934	123996484	protein_coding	Zfp276
187	ENSMUSG00000001076	22.857	1.09614	0.402266	-2.72492	0.00643179	NA	15	98981967	98985698	protein_coding	C1ql4
188	ENSMUSG00000001082	294.585	0.112879	0.113741	-0.992424	0.320991	0.863892	5	34790986	34794556	protein_coding	Mfsd10
189	ENSMUSG00000001089	1092.81	-0.0715508	0.0879611	0.813437	0.415968	0.885869	4	136197072	136282091	protein_coding	Luzp1
190	ENSMUSG00000001095	0	NA	NA	NA	NA	NA	11	78287913	78313043	protein_coding	Slc13a2
191	ENSMUSG00000001098	427.71	0.0456239	0.118471	-0.385108	0.700157	0.95204	5	114501628	114518569	protein_coding	Kctd10
192	ENSMUSG00000001100	1055.34	0.0579272	0.0719628	-0.80496	0.420843	0.886954	11	78403019	78413562	protein_coding	Poldip2
193	ENSMUSG00000001103	2.0229	3.62295	1.94784	-1.85999	0.0628872	NA	11	78394273	78395907	protein_coding	Sebox
194	ENSMUSG00000001105	395.536	0.076845	0.102992	-0.746125	0.455592	0.896459	11	78427187	78432563	protein_coding	Ift20
195	ENSMUSG00000001119	189.093	-0.157456	0.170007	0.926177	0.354354	0.872056	10	76544626	76562002	protein_coding	Col6a1
196	ENSMUSG00000001120	659.918	0.114681	0.0898529	-1.27632	0.201843	0.805358	10	76597691	76797721	protein_coding	Pcbp3
197	ENSMUSG00000001123	45.9859	-0.112281	0.319696	0.351211	0.72543	NA	11	78853800	78875772	protein_coding	Lgals9
198	ENSMUSG00000001127	4079.25	0.0216597	0.0622243	-0.348091	0.727772	0.961338	X	20664053	20726758	protein_coding	Araf
199	ENSMUSG00000001128	166.364	-0.115841	0.157001	0.737834	0.460615	0.899006	X	20791693	20797794	protein_coding	Cfp
200	ENSMUSG00000001131	15.1617	-0.625057	0.415197	1.50545	0.13221	NA	X	20736405	20740974	protein_coding	Timp1
201	ENSMUSG00000001134	33.8124	0.203189	0.456015	-0.445575	0.655904	NA	X	20807961	20828256	protein_coding	Uxt
202	ENSMUSG00000001138	676.611	0.0297999	0.0856797	-0.347806	0.727986	0.961456	1	36550948	36567318	protein_coding	Cnnm3
203	ENSMUSG00000001143	755.294	-0.0695211	0.0810148	0.858128	0.390822	0.881272	1	36458952	36484352	protein_coding	Lman2l
204	ENSMUSG00000001150	977.678	-0.0552193	0.0725793	0.760814	0.446768	0.892028	10	76304761	76351691	protein_coding	Mcm3ap
205	ENSMUSG00000001151	593.894	0.123734	0.124941	-0.990341	0.322007	0.863892	10	76187097	76278620	protein_coding	Pcnt
206	ENSMUSG00000001155	1.10847	0.856835	1.3849	-0.6187	0.536114	NA	10	76411482	76426172	protein_coding	Ftcd
207	ENSMUSG00000001156	338.76	-0.0675832	0.109033	0.619842	0.535362	0.913201	6	86624024	86646143	protein_coding	Mxd1
208	ENSMUSG00000001157	475.301	-0.0577277	0.094283	0.612281	0.540352	0.91369	6	86668750	86710365	protein_coding	Gmcl1
209	ENSMUSG00000001158	404.087	-0.0689003	0.100004	0.688976	0.490839	0.903085	6	86652133	86661504	protein_coding	Snrnp27
210	ENSMUSG00000001166	22.0884	0.651851	0.486766	-1.33915	0.180523	NA	5	120938259	120950579	protein_coding	Oas1c
211	ENSMUSG00000001168	0.126889	15.3212	280.455	-0.05463	0.956433	NA	5	120999484	121011569	protein_coding	Oas1h
212	ENSMUSG00000001173	2362.9	0.0334693	0.0808046	-0.414201	0.678727	0.946644	X	47001264	47054745	protein_coding	Ocrl
213	ENSMUSG00000001175	18877.1	0.0194625	0.0679963	-0.286229	0.774703	0.970346	12	100165694	100176073	protein_coding	Calm1
214	ENSMUSG00000001211	3703.27	0.00586871	0.062437	-0.0939941	0.925114	0.991485	10	78105012	78188323	protein_coding	Agpat3
215	ENSMUSG00000001225	29.2849	-0.696992	0.463822	1.50271	0.132913	NA	12	31440870	31523916	protein_coding	Slc26a3
216	ENSMUSG00000001227	1017.58	0.0249952	0.0740632	-0.337485	0.735751	0.962012	17	56430085	56447343	protein_coding	Sema6b
217	ENSMUSG00000001228	17.5106	-0.879442	0.3996	2.2008	0.0277499	NA	17	56610321	56630486	protein_coding	Uhrf1
218	ENSMUSG00000001229	869.705	-0.118454	0.0749386	1.58068	0.11395	0.717998	17	56493807	56525905	protein_coding	Dpp9
219	ENSMUSG00000001240	85.4641	-0.060793	0.223841	0.27159	0.785937	0.970586	11	101136854	101150372	protein_coding	Ramp2
220	ENSMUSG00000001247	16.72	0.0838924	0.417798	-0.200796	0.840858	NA	7	30657195	30672889	protein_coding	Lsr
221	ENSMUSG00000001248	1841.21	-0.0598624	0.0696073	0.860002	0.389788	0.880832	7	30829552	30855321	protein_coding	Gramd1a
222	ENSMUSG00000001249	11.9879	-0.18366	0.573568	0.320206	0.748812	NA	7	30798150	30814715	protein_coding	Hpn
223	ENSMUSG00000001260	1937.62	0.12537	0.0874767	-1.43318	0.151806	0.770058	5	70908390	70999960	protein_coding	Gabrg1
224	ENSMUSG00000001270	11733.1	0.115819	0.0569166	-2.03489	0.0418621	0.552416	12	111635795	111638772	protein_coding	Ckb
225	ENSMUSG00000001280	669.208	0.0765671	0.0925697	-0.827129	0.408164	0.883461	15	102314578	102344839	protein_coding	Sp1
226	ENSMUSG00000001281	8.89424	1.07483	0.591286	-1.81779	0.0690969	NA	15	102124430	102140379	protein_coding	Itgb7
227	ENSMUSG00000001285	444.08	0.0924734	0.0926198	-0.99842	0.318076	0.863892	15	102240144	102246574	protein_coding	Myg1
228	ENSMUSG00000001288	165.513	0.154683	0.173523	-0.891428	0.3727	0.877628	15	102143373	102165952	protein_coding	Rarg
229	ENSMUSG00000001289	1612.22	0.270412	0.0641211	-4.2172	2.47351e-05	0.0198338	15	102234551	102240308	protein_coding	Pfdn5
230	ENSMUSG00000001300	411.355	-0.00632028	0.297352	0.0212552	0.983042	0.997509	8	8667434	8711242	protein_coding	Efnb2
231	ENSMUSG00000001305	135.963	0.273583	0.165104	-1.65704	0.0975122	0.699301	1	186453175	186481555	protein_coding	Rrp15
232	ENSMUSG00000001313	1667.12	0.220993	0.106444	-2.07615	0.0378798	0.533689	11	101355825	101362679	protein_coding	Rnd2
233	ENSMUSG00000001323	417.779	0.0818174	0.0995657	-0.821742	0.411224	0.885704	11	74797185	74816774	protein_coding	Srr
234	ENSMUSG00000001333	19.4673	0.134051	0.370419	-0.361892	0.717433	NA	4	129181410	129202352	protein_coding	Sync
235	ENSMUSG00000001334	627.83	-0.128768	0.12722	1.01216	0.31146	0.863714	4	129030477	129038386	protein_coding	Fndc5
236	ENSMUSG00000001348	0.981066	2.60973	1.79677	-1.45246	0.146374	NA	9	22038023	22047007	protein_coding	Acp5
237	ENSMUSG00000001349	7.2989	0.835366	0.700718	-1.19216	0.2332	NA	9	22010512	22020926	protein_coding	Cnn1
238	ENSMUSG00000001366	1188.29	0.0577131	0.0784041	-0.736098	0.461671	0.899167	9	77988781	78016347	protein_coding	Fbxo9
239	ENSMUSG00000001376	789.854	0.0249533	0.082166	-0.303693	0.761361	0.969286	6	3498382	3603531	protein_coding	Vps50
240	ENSMUSG00000001380	1164.93	0.0840704	0.0793784	-1.05911	0.28955	0.854981	18	36899581	36916258	protein_coding	Hars1
241	ENSMUSG00000001383	1597.26	0.114835	0.0913981	-1.25643	0.208962	0.808866	18	36926929	36932719	protein_coding	Zmat2
242	ENSMUSG00000001403	1.49636	-1.6479	1.39676	1.1798	0.238081	NA	2	164611818	164620742	protein_coding	Ube2c
243	ENSMUSG00000001415	1612.68	0.0625377	0.0668802	-0.93507	0.349752	0.870226	3	88243567	88269645	protein_coding	Smg5
244	ENSMUSG00000001416	1859.83	0.222649	0.0753343	-2.95548	0.00312186	0.217835	3	88204423	88229074	protein_coding	Cct3
245	ENSMUSG00000001418	430.219	-0.127523	0.0986643	1.2925	0.196186	0.803666	3	88232330	88238620	protein_coding	Glmp
246	ENSMUSG00000001419	2532.96	-0.00507955	0.0671021	0.0756988	0.939659	0.992473	3	88049679	88079393	protein_coding	Mef2d
247	ENSMUSG00000001420	6.38581	-0.435538	0.677204	0.643142	0.520132	NA	3	88235962	88243455	protein_coding	Tmem79
248	ENSMUSG00000001424	1586.44	0.0551127	0.0714935	-0.770877	0.44078	0.889451	6	28475138	28935161	protein_coding	Snd1
249	ENSMUSG00000001435	182.975	-0.159451	0.420511	0.379184	0.704551	0.952574	10	76888012	77002382	protein_coding	Col18a1
250	ENSMUSG00000001436	222.447	0.0601435	0.126871	-0.474054	0.635461	0.938178	10	76868075	76896836	protein_coding	Slc19a1
251	ENSMUSG00000001440	3101.17	-0.0521313	0.0589218	0.884755	0.376289	0.877912	11	97050540	97078707	protein_coding	Kpnb1
252	ENSMUSG00000001441	2180.26	-0.0914434	0.0687842	1.32942	0.183708	0.791435	11	97096668	97171464	protein_coding	Npepps
253	ENSMUSG00000001444	9.79819	-0.833768	0.558277	1.49347	0.135315	NA	11	96988897	97006157	protein_coding	Tbx21
254	ENSMUSG00000001445	619.261	-0.00840183	0.0863035	0.0973521	0.922447	0.991106	11	96932386	96940039	protein_coding	Mrpl10
255	ENSMUSG00000001467	1124.11	0.047638	0.067675	-0.703924	0.48148	0.901871	5	4131145	4154746	protein_coding	Cyp51
256	ENSMUSG00000001472	9929.54	0.058917	0.0632321	-0.931758	0.351462	0.870226	8	124100492	124130574	protein_coding	Tcf25
257	ENSMUSG00000001473	122.708	-0.0902163	0.174941	0.515696	0.606067	0.931748	18	67523787	67535819	protein_coding	Tubb6
258	ENSMUSG00000001482	904.439	-0.0134018	0.0755308	0.177435	0.859167	0.984112	8	124150266	124190009	protein_coding	Def8
259	ENSMUSG00000001493	13.6159	-0.490371	0.436466	1.1235	0.261223	NA	11	101768336	101785200	protein_coding	Meox1
260	ENSMUSG00000001494	0.114134	-14.5802	197.814	0.0737068	0.941244	NA	11	101853284	101857841	protein_coding	Sost
261	ENSMUSG00000001496	45.1939	-1.37769	0.40836	3.37372	0.000741609	NA	12	56578743	56583693	protein_coding	Nkx2-1
262	ENSMUSG00000001497	1.41497	1.16734	1.33839	-0.872194	0.383103	NA	12	56738552	56759607	protein_coding	Pax9
263	ENSMUSG00000001504	17.5267	0.295689	0.395068	-0.748452	0.454188	NA	13	72776939	72782317	protein_coding	Irx2
264	ENSMUSG00000001506	50.7246	-0.0790168	0.284429	0.277809	0.781159	NA	11	94827050	94843868	protein_coding	Col1a1
265	ENSMUSG00000001507	959.128	0.0695352	0.0702088	-0.990405	0.321976	0.863892	11	94935300	94967627	protein_coding	Itga3
266	ENSMUSG00000001508	2.37125	-0.14741	1.09989	0.134023	0.893385	NA	11	94853617	94867153	protein_coding	Sgca
267	ENSMUSG00000001510	2.40328	-0.667362	0.998557	0.668326	0.503926	NA	11	95010945	95016122	protein_coding	Dlx3
268	ENSMUSG00000001517	35.7128	0.332421	0.334272	-0.994462	0.319998	NA	6	128339930	128353109	protein_coding	Foxm1
269	ENSMUSG00000001518	647.633	0.181156	0.0807663	-2.24296	0.0248993	0.469888	6	128386407	128401894	protein_coding	Itfg2
270	ENSMUSG00000001520	571.156	0.00492163	0.0993998	-0.0495135	0.96051	0.994944	6	128376259	128393390	protein_coding	Nrip2
271	ENSMUSG00000001521	367.516	-0.0715357	0.100103	0.71462	0.474844	0.901527	6	128298124	128332814	protein_coding	Tulp3
272	ENSMUSG00000001524	109.643	0.127027	0.181912	-0.698287	0.484998	0.902651	17	35978622	35984631	protein_coding	Gtf2h4
273	ENSMUSG00000001525	7354.07	0.0612038	0.067615	-0.905181	0.36537	0.876685	17	36144813	36149198	protein_coding	Tubb5
274	ENSMUSG00000001542	273.506	-0.114	0.128224	0.889069	0.373966	0.877628	13	75854876	75920483	protein_coding	Ell2
275	ENSMUSG00000001552	542.889	0.0424119	0.118653	-0.357444	0.72076	0.958992	11	100259784	100288589	protein_coding	Jup
276	ENSMUSG00000001555	122.981	0.0415127	0.172467	-0.240699	0.809788	0.977368	11	100306523	100315650	protein_coding	Fkbp10
277	ENSMUSG00000001558	10.2181	-0.821655	0.668744	1.22865	0.219202	NA	11	100332743	100347848	protein_coding	Klhl10
278	ENSMUSG00000001566	0	NA	NA	NA	NA	NA	5	29678032	29683468	protein_coding	Mnx1
279	ENSMUSG00000001569	462.981	0.162114	0.0978319	-1.65707	0.0975051	0.699301	5	29639662	29662841	protein_coding	Nom1
280	ENSMUSG00000001576	2071.51	-0.0189696	0.0661106	0.286938	0.77416	0.970346	17	26780463	26875908	protein_coding	Ergic1
281	ENSMUSG00000001583	0.463847	16.8016	269.86	-0.0622604	0.950355	NA	11	69741831	69749556	protein_coding	Tnk1
282	ENSMUSG00000001588	38.5881	0.464507	0.785996	-0.590978	0.554535	NA	11	69772393	69786365	protein_coding	Acap1
283	ENSMUSG00000001604	14.5612	0.131344	0.43316	-0.303223	0.76172	NA	4	135975040	136002209	protein_coding	Tcea3
284	ENSMUSG00000001622	0	NA	NA	NA	NA	NA	5	88073438	88080524	protein_coding	Csn3
285	ENSMUSG00000001627	221.601	0.111655	0.128206	-0.870907	0.383805	0.879539	12	40251566	40298503	protein_coding	Ifrd1
286	ENSMUSG00000001630	366.771	-0.108829	0.100177	1.08637	0.277315	0.849969	6	146626493	146680310	protein_coding	Stk38l
287	ENSMUSG00000001632	446.931	0.0156581	0.11048	-0.141728	0.887295	0.985683	6	113284098	113301821	protein_coding	Brpf1
288	ENSMUSG00000001642	560.714	0.153131	0.0997068	-1.53581	0.124585	0.736406	6	34279369	34294413	protein_coding	Akr1b1
289	ENSMUSG00000001655	0	NA	NA	NA	NA	NA	15	102829538	102837249	protein_coding	Hoxc13
290	ENSMUSG00000001656	0	NA	NA	NA	NA	NA	15	102862862	102866143	protein_coding	Hoxc11
291	ENSMUSG00000001657	0	NA	NA	NA	NA	NA	15	102899039	102902543	protein_coding	Hoxc8
292	ENSMUSG00000001661	0	NA	NA	NA	NA	NA	15	102906689	102920313	protein_coding	Hoxc6
293	ENSMUSG00000001663	259.09	0.0423582	0.12036	-0.351928	0.724892	0.960221	10	75619647	75634418	protein_coding	Gstt1
294	ENSMUSG00000001665	58.5796	-0.219622	0.308073	0.712889	0.475915	NA	10	75609949	75617248	protein_coding	Gstt3
295	ENSMUSG00000001666	127.08	0.221203	0.218404	-1.01281	0.311149	0.863714	10	75607064	75609248	protein_coding	Ddt
296	ENSMUSG00000001670	10.8584	-0.498032	0.645865	0.771109	0.440643	NA	8	110717069	110726435	protein_coding	Tat
297	ENSMUSG00000001672	18.7044	-0.0450365	0.379708	0.118608	0.905586	NA	8	110674546	110688835	protein_coding	Marveld3
298	ENSMUSG00000001674	318.519	0.0402115	0.120097	-0.334825	0.737757	0.962186	1	121481564	121495718	protein_coding	Ddx18
299	ENSMUSG00000001687	1707.02	0.0285552	0.0654632	-0.436202	0.66269	0.943784	5	148441445	148489599	protein_coding	Ubl3
300	ENSMUSG00000001700	182.613	0.176694	0.202276	-0.873528	0.382375	0.879317	18	56533409	56636864	protein_coding	Gramd2b
301	ENSMUSG00000001707	320.859	0.0612993	0.110059	-0.556969	0.577549	0.924868	13	38828183	38843034	protein_coding	Eef1e1
302	ENSMUSG00000001729	2159.92	0.000747434	0.063785	-0.011718	0.990651	0.998521	12	112620255	112641318	protein_coding	Akt1
303	ENSMUSG00000001739	1.21015	-0.371198	1.33348	0.278368	0.78073	NA	5	136995470	137004712	protein_coding	Cldn15
304	ENSMUSG00000001741	23.8169	-0.337516	0.367202	0.919154	0.358015	NA	7	83292033	83394934	protein_coding	Il16
305	ENSMUSG00000001750	271.031	-0.0183516	0.128949	0.142317	0.88683	0.985638	19	3946050	3957133	protein_coding	Tcirg1
306	ENSMUSG00000001751	136.026	0.142671	0.158672	-0.899156	0.36857	0.876685	11	100960838	100968498	protein_coding	Naglu
307	ENSMUSG00000001755	413.348	0.098956	0.10214	-0.968823	0.332633	0.868246	11	100973391	100977445	protein_coding	Coasy
308	ENSMUSG00000001761	509.685	-0.0212971	0.115732	0.184022	0.853996	0.984112	6	29735502	29761364	protein_coding	Smo
309	ENSMUSG00000001763	595.083	0.152056	0.10817	-1.40571	0.15981	0.776013	6	29694221	29718558	protein_coding	Tspan33
310	ENSMUSG00000001767	277.799	0.063095	0.127534	-0.494732	0.620789	0.936877	2	145759399	145776934	protein_coding	Crnkl1
311	ENSMUSG00000001768	496.279	-0.0202281	0.089081	0.227075	0.820365	0.980608	2	145517135	145729536	protein_coding	Rin2
312	ENSMUSG00000001773	192.591	-0.0262912	0.134329	0.195722	0.844828	0.984112	7	86368185	86425151	protein_coding	Folh1
313	ENSMUSG00000001774	1035.17	-0.189966	0.0779886	2.43582	0.0148583	0.409332	9	18203421	18228738	protein_coding	Chordc1
314	ENSMUSG00000001783	1843.96	0.109344	0.0784656	-1.39353	0.16346	0.779023	10	85774501	85793687	protein_coding	Rtcb
315	ENSMUSG00000001785	354.886	0.0918252	0.12058	-0.761529	0.446341	0.892028	10	85665358	85724960	protein_coding	Pwp1
316	ENSMUSG00000001786	747.138	-0.0565726	0.102299	0.55301	0.580257	0.925556	10	85857836	85887737	protein_coding	Fbxo7
317	ENSMUSG00000001794	2483.91	0.123493	0.0602709	-2.04897	0.0404654	0.546405	7	29886361	29898236	protein_coding	Capns1
318	ENSMUSG00000001802	1273.69	-0.00716489	0.0671801	0.106652	0.915065	0.988491	7	34899452	34914923	protein_coding	Lrp3
319	ENSMUSG00000001804	0	NA	NA	NA	NA	NA	18	20569232	20604878	protein_coding	Dsg4
320	ENSMUSG00000001815	0	NA	NA	NA	NA	NA	2	74483335	74489901	protein_coding	Evx2
321	ENSMUSG00000001819	0	NA	NA	NA	NA	NA	2	74498654	74501943	protein_coding	Hoxd13
322	ENSMUSG00000001823	0	NA	NA	NA	NA	NA	2	74505357	74508049	protein_coding	Hoxd12
323	ENSMUSG00000001827	9.39921	0.595424	0.568562	-1.04725	0.294986	NA	7	101507538	101519995	protein_coding	Folr1
324	ENSMUSG00000001829	864.04	0.0714289	0.0752671	-0.949005	0.342618	0.870226	7	101312840	101444713	protein_coding	Clpb
325	ENSMUSG00000001833	3385.72	0.0108114	0.0710713	-0.152121	0.879092	0.984881	9	25163735	25219867	protein_coding	Septin7
326	ENSMUSG00000001844	344.692	0.307679	0.120774	-2.54757	0.0108477	0.374423	5	143302244	143315011	protein_coding	Zdhhc4
327	ENSMUSG00000001847	3123.59	0.0644283	0.0666665	-0.966428	0.33383	0.868246	5	143489389	143513791	protein_coding	Rac1
328	ENSMUSG00000001855	802.016	-0.028715	0.0765778	0.374977	0.707677	0.95311	2	31864448	31943987	protein_coding	Nup214
329	ENSMUSG00000001864	132.113	0.0790173	0.239276	-0.330235	0.741223	0.963885	2	31840151	31863454	protein_coding	Aif1l
330	ENSMUSG00000001865	0	NA	NA	NA	NA	NA	3	20269784	20296345	protein_coding	Cpa3
331	ENSMUSG00000001870	38.8831	-0.182165	0.335281	0.543319	0.58691	NA	17	75312563	75699507	protein_coding	Ltbp1
332	ENSMUSG00000001891	815.626	0.0055595	0.075414	-0.0737198	0.941233	0.992473	11	21271138	21321201	protein_coding	Ugp2
333	ENSMUSG00000001901	120.008	0.496189	0.168621	-2.94262	0.00325444	0.221914	11	105898950	105925375	protein_coding	Kcnh6
334	ENSMUSG00000001909	935.966	-0.0285437	0.0761376	0.374896	0.707738	0.95311	8	85412936	85426437	protein_coding	Trmt1
335	ENSMUSG00000001910	1830.04	0.109196	0.0621427	-1.75717	0.0788883	0.671628	8	85397108	85414531	protein_coding	Nacc1
336	ENSMUSG00000001911	1437.02	0.00101755	0.116666	-0.00872193	0.993041	0.998913	8	85426505	85526973	protein_coding	Nfix
337	ENSMUSG00000001918	37.3862	0.189151	0.319192	-0.592592	0.553454	NA	7	16515265	16532199	protein_coding	Slc1a5
338	ENSMUSG00000001924	5903.34	0.0160824	0.0598216	-0.26884	0.788053	0.971048	X	20524565	20549418	protein_coding	Uba1
339	ENSMUSG00000001930	181.351	0.46361	0.189741	-2.44338	0.0145502	0.407054	6	125523737	125663642	protein_coding	Vwf
340	ENSMUSG00000001942	331.618	0.069079	0.115154	-0.599883	0.548584	0.915601	9	37466994	37560951	protein_coding	Siae
341	ENSMUSG00000001943	27.1854	0.22045	0.361018	-0.610635	0.541441	NA	9	37450551	37455501	protein_coding	Vsig2
342	ENSMUSG00000001946	91.3289	0.0127087	0.228131	-0.0557079	0.955574	0.994829	9	37439374	37449615	protein_coding	Esam
343	ENSMUSG00000001948	65.2122	0.307569	0.248777	-1.23632	0.216339	NA	9	37514586	37525018	protein_coding	Spa17
344	ENSMUSG00000001962	333.229	0.0669662	0.106118	-0.631052	0.528006	0.910783	X	73356639	73363755	protein_coding	Fam50a
345	ENSMUSG00000001964	454.434	0.157665	0.092189	-1.71023	0.087223	0.679056	X	73298293	73305154	protein_coding	Emd
346	ENSMUSG00000001983	118.656	-0.339184	0.187912	1.80502	0.0710716	0.648587	11	105956887	105964438	protein_coding	Taco1
347	ENSMUSG00000001985	2869.31	-0.146215	0.0633095	2.30953	0.0209142	0.446531	4	125384493	125607966	protein_coding	Grik3
348	ENSMUSG00000001986	1283.72	-0.0118266	0.0733069	0.16133	0.871834	0.984427	X	40489731	40767478	protein_coding	Gria3
349	ENSMUSG00000001988	68.8655	0.022223	0.35722	-0.0622111	0.950395	0.993498	7	16189646	16211653	protein_coding	Npas1
350	ENSMUSG00000001995	1102.73	-0.0759277	0.0739399	1.02688	0.304475	0.86143	8	126144802	126296547	protein_coding	Sipa1l2
351	ENSMUSG00000001998	276.565	-0.17914	0.115865	1.54611	0.122079	0.732116	2	126850637	126909829	protein_coding	Ap4e1
352	ENSMUSG00000001999	185.064	0.0823099	0.152938	-0.53819	0.590446	0.927782	2	126912585	126939004	protein_coding	Blvra
353	ENSMUSG00000002006	1601.82	0.0569208	0.0732086	-0.777516	0.436854	0.888919	X	72836965	72868575	protein_coding	Pdzd4
354	ENSMUSG00000002007	77.195	0.0984104	0.24007	-0.409924	0.681862	0.947464	X	72818011	72822531	protein_coding	Srpk3
355	ENSMUSG00000002010	1866.86	0.0199066	0.073892	-0.269401	0.787621	0.970917	X	72822569	72830503	protein_coding	Idh3g
356	ENSMUSG00000002012	2949.15	0.100871	0.0842753	-1.19692	0.231337	0.826076	X	72699600	72703723	protein_coding	Pnck
357	ENSMUSG00000002014	636.399	0.183933	0.0815146	-2.25644	0.0240432	0.463657	X	72830634	72834436	protein_coding	Ssr4
358	ENSMUSG00000002015	862.999	0.170056	0.0882408	-1.92718	0.0539578	0.606822	X	72729784	72759781	protein_coding	Bcap31
359	ENSMUSG00000002017	447.172	-0.0762684	0.0929132	0.820857	0.411728	0.885774	17	75844081	75858941	protein_coding	Fam98a
360	ENSMUSG00000002020	22.4593	-0.92748	0.60047	1.54459	0.122445	NA	12	84829986	84923306	protein_coding	Ltbp2
361	ENSMUSG00000002028	5570.42	-0.139201	0.077923	1.7864	0.074035	0.661651	9	44714652	44792594	protein_coding	Kmt2a
362	ENSMUSG00000002031	700.311	0.109813	0.0877362	-1.25163	0.210705	0.80976	9	44679205	44704744	protein_coding	Ift46
363	ENSMUSG00000002032	798.738	-0.0437366	0.0853266	0.512578	0.608246	0.932579	9	44705066	44710604	protein_coding	Tmem25
364	ENSMUSG00000002033	0.24952	16.2226	273.861	-0.0592366	0.952764	NA	9	44880870	44891729	protein_coding	Cd3g
365	ENSMUSG00000002043	61.5352	0.099952	0.247358	-0.404079	0.686155	NA	7	19242320	19250070	protein_coding	Trappc6a
366	ENSMUSG00000002052	3706.07	0.00472734	0.0677535	-0.0697727	0.944375	0.993119	11	78097572	78136813	protein_coding	Supt6
367	ENSMUSG00000002055	194.374	-0.123515	0.152346	0.810755	0.417506	0.886392	11	78192355	78213283	protein_coding	Spag5
368	ENSMUSG00000002057	0.456536	-16.4066	193.321	0.0848671	0.932367	NA	11	78248403	78277384	protein_coding	Foxn1
369	ENSMUSG00000002058	462.886	0.104686	0.111739	-0.936884	0.348818	0.870226	11	78234308	78239990	protein_coding	Unc119
370	ENSMUSG00000002059	294.815	-0.125154	0.113927	1.09854	0.271967	0.848175	11	78079256	78083019	protein_coding	Rab34
371	ENSMUSG00000002064	689.188	0.178439	0.0855522	-2.08573	0.0370029	0.528387	11	78136572	78146322	protein_coding	Sdf2
372	ENSMUSG00000002068	112.89	0.0578813	0.18291	-0.316447	0.751663	0.967039	7	37797409	37806959	protein_coding	Ccne1
373	ENSMUSG00000002076	4.59396	-0.214907	0.772553	0.278178	0.780875	NA	17	32163743	32255323	protein_coding	Hsf2bp
374	ENSMUSG00000002083	35.5044	0.292154	0.310319	-0.941463	0.346468	NA	7	16042318	16052130	protein_coding	Bbc3
375	ENSMUSG00000002100	0.876438	1.13065	1.4846	-0.761587	0.446307	NA	2	90948489	90966861	protein_coding	Mybpc3
376	ENSMUSG00000002102	1548.85	0.173848	0.0718061	-2.42107	0.0154749	0.412741	2	90884354	90896714	protein_coding	Psmc3
377	ENSMUSG00000002103	1452.88	-0.0400199	0.0671192	0.59625	0.551008	0.916021	2	91033230	91044443	protein_coding	Acp2
378	ENSMUSG00000002104	5.6083	-0.262255	0.683293	0.383811	0.701119	NA	2	90865965	90876074	protein_coding	Rapsn
379	ENSMUSG00000002105	338.387	-0.00367378	0.108496	0.033861	0.972988	0.995795	2	90892136	90900762	protein_coding	Slc39a13
380	ENSMUSG00000002107	2010.29	-0.25649	0.0797452	3.21636	0.00129826	0.14185	2	6544505	7514374	protein_coding	Celf2
381	ENSMUSG00000002108	42.1155	0.161845	0.331124	-0.488775	0.625001	NA	2	91014406	91033179	protein_coding	Nr1h3
382	ENSMUSG00000002109	164.533	0.226508	0.178737	-1.26727	0.205059	0.806203	2	91041917	91067327	protein_coding	Ddb2
383	ENSMUSG00000002111	27.9142	0.250399	0.349799	-0.715835	0.474093	NA	2	90912735	90946101	protein_coding	Spi1
384	ENSMUSG00000002129	1417.46	-0.00409124	0.0664621	0.0615575	0.950915	0.993498	11	4110350	4132541	protein_coding	Sf3a1
385	ENSMUSG00000002147	78.1127	0.194684	0.273847	-0.710923	0.477132	0.901527	10	127478855	127496826	protein_coding	Stat6
386	ENSMUSG00000002190	147.635	-0.166098	0.183078	0.907254	0.364272	0.876685	8	84116496	84155181	protein_coding	Clgn
387	ENSMUSG00000002204	13.5513	-0.883698	0.506203	1.74574	0.0808561	NA	7	44221804	44236286	protein_coding	Napsa
388	ENSMUSG00000002205	276.357	-0.0772552	0.114818	0.672849	0.501044	0.906097	7	44397837	44426939	protein_coding	Vrk3
389	ENSMUSG00000002210	386.134	0.074385	0.135043	-0.550826	0.581753	0.925693	7	24099044	24122203	protein_coding	Smg9
390	ENSMUSG00000002221	754.66	-0.0719391	0.0758905	0.947933	0.343164	0.870226	5	27945078	27996689	protein_coding	Paxip1
391	ENSMUSG00000002222	1633.38	-0.112294	0.0761611	1.47443	0.140365	0.754201	6	71365618	71417621	protein_coding	Rmnd5a
392	ENSMUSG00000002227	295.73	-0.0121354	0.121133	0.100182	0.9202	0.990416	3	104702152	104725879	protein_coding	Mov10
393	ENSMUSG00000002228	2.63809	0.385298	0.97194	-0.396421	0.691794	NA	3	104688372	104693334	protein_coding	Ppm1j
394	ENSMUSG00000002233	165.757	-0.0732766	0.142758	0.513293	0.607747	0.932473	3	104695691	104701775	protein_coding	Rhoc
395	ENSMUSG00000002240	0	NA	NA	NA	NA	NA	5	87973545	87994246	protein_coding	Prr27
396	ENSMUSG00000002249	72.4413	0.366906	0.295251	-1.24269	0.213981	0.813103	17	28550645	28569791	protein_coding	Tead3
397	ENSMUSG00000002250	288.35	-0.0778898	0.125943	0.618454	0.536276	0.913201	17	28451674	28520448	protein_coding	Ppard
398	ENSMUSG00000002257	20.5434	0.380895	0.455577	-0.836072	0.403115	NA	17	28426752	28447582	protein_coding	Def6
399	ENSMUSG00000002265	30086	-0.0895998	0.0584363	1.53329	0.125204	0.738198	7	6706891	6733430	protein_coding	Peg3
400	ENSMUSG00000002266	1910.51	-0.214357	0.0776481	2.76062	0.00576915	0.287108	7	6674268	6699449	protein_coding	Zim1
401	ENSMUSG00000002274	322.544	0.00544603	0.126673	-0.0429929	0.965707	0.995641	17	26012195	26016057	protein_coding	Metrn
402	ENSMUSG00000002279	266.531	0.128356	0.116281	-1.10385	0.269658	0.847513	17	25798059	25881800	protein_coding	Lmf1
403	ENSMUSG00000002280	316.727	-0.0897942	0.112194	0.800348	0.423509	0.886954	17	25992750	26002306	protein_coding	Ciao3
404	ENSMUSG00000002289	53.6974	-0.0967222	0.247865	0.390221	0.696373	NA	17	33992724	34000804	protein_coding	Angptl4
405	ENSMUSG00000002297	25.3254	0.948037	0.345878	-2.74096	0.00612603	NA	5	8446973	8472716	protein_coding	Dbf4
406	ENSMUSG00000002307	317.437	0.102611	0.143912	-0.713014	0.475837	0.901527	17	34128388	34134564	protein_coding	Daxx
407	ENSMUSG00000002308	157.542	0.034885	0.1504	-0.231948	0.816578	0.979104	17	34062065	34068748	protein_coding	Cd320
408	ENSMUSG00000002319	596.919	-0.0434981	0.0840063	0.517795	0.604601	0.931689	14	55862857	55873414	protein_coding	Ipo4
409	ENSMUSG00000002320	354.987	0.208754	0.10868	-1.92081	0.0547551	0.60693	14	55873422	55881263	protein_coding	Tm9sf1
410	ENSMUSG00000002324	235.24	0.118063	0.210682	-0.560385	0.575217	0.92457	14	55855494	55862852	protein_coding	Rec8
411	ENSMUSG00000002325	166.532	0.14541	0.161235	-0.901854	0.367135	0.876685	14	55841028	55847487	protein_coding	Irf9
412	ENSMUSG00000002326	74.5611	0.097654	0.214629	-0.454989	0.649117	0.940728	14	55909398	55916657	protein_coding	Gmpr2
413	ENSMUSG00000002329	375.02	0.10785	0.101624	-1.06126	0.288571	0.854981	14	55895336	55897965	protein_coding	Mdp1
414	ENSMUSG00000002332	725.63	-0.0211821	0.0920319	0.23016	0.817967	0.979104	14	55976477	55983147	protein_coding	Dhrs1
415	ENSMUSG00000002341	1723.07	-0.161263	0.0713265	2.26091	0.0237651	0.463657	8	70545735	70573523	protein_coding	Ncan
416	ENSMUSG00000002342	410.37	-0.00255913	0.0950604	0.0269211	0.978523	0.996446	8	70625006	70636331	protein_coding	Tmem161a
417	ENSMUSG00000002343	346.755	-0.0166213	0.113006	0.147083	0.883067	0.98508	8	70672822	70687116	protein_coding	Armc6
418	ENSMUSG00000002345	317.425	0.00430203	0.109463	-0.0393013	0.96865	0.995767	8	70592149	70599969	protein_coding	Borcs8
419	ENSMUSG00000002346	558.773	-0.0490893	0.107948	0.454748	0.64929	0.940728	8	70636990	70664955	protein_coding	Slc25a42
420	ENSMUSG00000002365	258.304	0.238922	0.171059	-1.39672	0.162498	0.777426	17	5891604	5982229	protein_coding	Snx9
421	ENSMUSG00000002372	1260.53	-0.000421913	0.0672805	0.00627096	0.994997	0.999367	17	56980294	57018764	protein_coding	Ranbp3
422	ENSMUSG00000002379	550.28	0.202775	0.0945643	-2.14431	0.032008	0.510392	17	57024767	57029141	protein_coding	Ndufa11
423	ENSMUSG00000002384	16.8308	0.152329	0.446753	-0.34097	0.733126	NA	4	122998958	123025892	protein_coding	Bmp8b
424	ENSMUSG00000002393	50.7413	-0.0905026	0.25252	0.358398	0.720046	NA	8	71826767	71834604	protein_coding	Nr2f6
425	ENSMUSG00000002395	704.328	0.153069	0.0877628	-1.74413	0.0811372	0.673379	8	71819492	71822376	protein_coding	Use1
426	ENSMUSG00000002396	147.782	0.203811	0.175562	-1.1609	0.245681	0.836703	8	71823942	71832005	protein_coding	Ocel1
427	ENSMUSG00000002409	379.836	-0.0305764	0.0994673	0.307401	0.758538	0.968433	7	27878894	27886719	protein_coding	Dyrk1b
428	ENSMUSG00000002413	2042.3	-0.184452	0.0852235	2.16434	0.0304386	0.502368	6	39580171	39702397	protein_coding	Braf
429	ENSMUSG00000002416	348.11	-0.082712	0.119736	0.690787	0.489699	0.903054	6	39569508	39580316	protein_coding	Ndufb2
430	ENSMUSG00000002428	452.108	-0.0298695	0.109531	0.272703	0.785081	0.970529	3	20111975	20172654	protein_coding	Hltf
431	ENSMUSG00000002455	1364.83	0.0330417	0.0734889	-0.449614	0.652988	0.94127	2	181233661	181297453	protein_coding	Prpf6
432	ENSMUSG00000002458	267.186	0.154504	0.129745	-1.19083	0.233721	0.826076	2	181330212	181335770	protein_coding	Rgs19
433	ENSMUSG00000002459	231.292	0.0214907	0.135862	-0.158181	0.874314	0.984427	1	4979799	5140508	protein_coding	Rgs20
434	ENSMUSG00000002475	728.487	0.241	0.0768474	-3.13608	0.00171222	0.162556	18	10642092	10706771	protein_coding	Abhd3
435	ENSMUSG00000002477	512.821	0.180812	0.111844	-1.61664	0.105955	0.709128	18	10617775	10642079	protein_coding	Snrpd1
436	ENSMUSG00000002486	225.501	-0.0236839	0.147753	0.160294	0.872649	0.984427	5	114845821	114860388	protein_coding	Tchp
437	ENSMUSG00000002489	987.37	-0.0344209	0.074852	0.459853	0.645622	0.94008	16	89583999	89940657	protein_coding	Tiam1
438	ENSMUSG00000002496	2082.86	-0.0550693	0.0725675	0.75887	0.44793	0.892028	17	24814790	24851604	protein_coding	Tsc2
439	ENSMUSG00000002500	7.30484	0.974358	0.668009	-1.4586	0.144675	NA	17	24946794	24955117	protein_coding	Rpl3l
440	ENSMUSG00000002504	449.162	0.0466145	0.0973383	-0.478891	0.632016	0.938178	17	24858260	24869301	protein_coding	Nherf2
441	ENSMUSG00000002524	2093.55	0.0399225	0.0663284	-0.601891	0.547246	0.915155	15	75942031	75952773	protein_coding	Puf60
442	ENSMUSG00000002546	2018.92	0.0231097	0.0652395	-0.354228	0.723168	0.959671	2	32177396	32197933	protein_coding	Golga2
443	ENSMUSG00000002550	541.997	-0.0114724	0.0950329	0.12072	0.903913	0.987055	2	32145014	32150171	protein_coding	Uck1
444	ENSMUSG00000002565	10.7408	-0.492018	0.599987	0.820047	0.412189	NA	12	40109768	40184227	protein_coding	Scin
445	ENSMUSG00000002578	436.078	-0.0193886	0.106443	0.182151	0.855464	0.984112	10	128466712	128505227	protein_coding	Ikzf4
446	ENSMUSG00000002580	130.666	0.201584	0.184901	-1.09023	0.275613	0.848706	11	98328534	98329817	protein_coding	Mien1
447	ENSMUSG00000002588	0	NA	NA	NA	NA	NA	6	5168090	5193946	protein_coding	Pon1
448	ENSMUSG00000002602	827.552	0.0351137	0.0826005	-0.425103	0.670762	0.945202	7	25456698	25488130	protein_coding	Axl
449	ENSMUSG00000002603	38.9882	-0.265462	0.284291	0.933768	0.350424	NA	7	25386427	25404502	protein_coding	Tgfb1
450	ENSMUSG00000002608	720.742	0.0905739	0.0830116	-1.0911	0.275229	0.848372	7	25410531	25418513	protein_coding	Ccdc97
451	ENSMUSG00000002617	334.168	0.0101413	0.140867	-0.0719917	0.942609	0.992522	17	23392843	23412226	protein_coding	Zfp40
452	ENSMUSG00000002625	2512.12	-0.110993	0.121535	0.913267	0.361102	0.875665	17	32540398	32569581	protein_coding	Akap8l
453	ENSMUSG00000002633	114.929	-0.0515482	0.186058	0.277054	0.781738	0.970457	5	28661813	28672254	protein_coding	Shh
454	ENSMUSG00000002635	128.193	0.38824	0.162861	-2.38388	0.0171313	0.427141	7	33883924	33896086	protein_coding	Pdcd2l
455	ENSMUSG00000002658	733.285	0.0796016	0.0993395	-0.801309	0.422953	0.886954	17	57310405	57318288	protein_coding	Gtf2f1
456	ENSMUSG00000002660	751.971	0.0628391	0.0853496	-0.736255	0.461575	0.899167	17	57297305	57303188	protein_coding	Clpp
457	ENSMUSG00000002661	148.13	-0.128024	0.152403	0.840032	0.40089	0.88296	17	57304339	57306322	protein_coding	Alkbh7
458	ENSMUSG00000002664	4.54367	-0.656843	0.832204	0.789281	0.429948	NA	17	57306457	57307018	protein_coding	Pspn
459	ENSMUSG00000002668	34.2403	0.183239	0.29454	-0.62212	0.533863	NA	17	57372905	57385514	protein_coding	Dennd1c
460	ENSMUSG00000002679	187.235	0.173868	0.14111	-1.23214	0.217897	0.81687	12	81620331	81641782	protein_coding	Med6
461	ENSMUSG00000002688	307.888	-0.0216418	0.15427	0.140285	0.888434	0.985894	12	50388014	50695881	protein_coding	Prkd1
462	ENSMUSG00000002699	52.8634	-0.0190827	0.280946	0.0679231	0.945847	NA	11	33996920	34042295	protein_coding	Lcp2
463	ENSMUSG00000002718	1119.16	0.0500795	0.0800478	-0.625621	0.531564	0.911447	2	166747960	166788309	protein_coding	Cse1l
464	ENSMUSG00000002728	635.441	0.00124484	0.0875314	-0.0142216	0.988653	0.997801	2	145744019	145758345	protein_coding	Naa20
465	ENSMUSG00000002731	432.761	0.0119777	0.102953	-0.116342	0.907382	0.987251	2	76460242	76478359	protein_coding	Prkra
466	ENSMUSG00000002732	27.9435	-0.614787	0.323365	1.90122	0.0572737	NA	2	76493388	76503460	protein_coding	Fkbp7
467	ENSMUSG00000002733	532.822	-0.000344056	0.100312	0.00342987	0.997263	0.999725	2	76505625	76527172	protein_coding	Plekha3
468	ENSMUSG00000002741	897.969	0.0286476	0.0762175	-0.375867	0.707016	0.952956	11	5905693	5917780	protein_coding	Ykt6
469	ENSMUSG00000002748	2905.38	-0.0460301	0.0635237	0.724614	0.468689	0.901076	5	135216118	135274983	protein_coding	Baz1b
470	ENSMUSG00000002763	722.735	0.00724423	0.0822845	-0.0880388	0.929846	0.992147	17	47022389	47036467	protein_coding	Pex6
471	ENSMUSG00000002767	313.8	0.195359	0.135615	-1.44054	0.149715	0.768436	17	46957155	46961065	protein_coding	Mrpl2
472	ENSMUSG00000002768	736.85	0.0154244	0.0815692	-0.189096	0.850018	0.984112	17	46989719	46994037	protein_coding	Mea1
473	ENSMUSG00000002769	21.5847	0.569168	0.413363	-1.37692	0.168536	NA	17	47036590	47040094	protein_coding	Gnmt
474	ENSMUSG00000002771	657.719	0.0687152	0.0834169	-0.823756	0.410078	0.8848	7	45481307	45527802	protein_coding	Grin2d
475	ENSMUSG00000002778	702.816	0.0419776	0.0868749	-0.483196	0.628957	0.938178	7	45522196	45533156	protein_coding	Kdelr1
476	ENSMUSG00000002781	228.715	-0.189176	0.13023	1.45263	0.146327	0.765062	7	45546365	45566837	protein_coding	Tmem143
477	ENSMUSG00000002791	5.62299	-0.485055	0.697305	0.695614	0.486671	NA	17	32295520	32319260	transcribed_unprocessed_pseudogene	Pdxk-ps
478	ENSMUSG00000002797	214.052	0.123802	0.138605	-0.893201	0.37175	0.877628	6	54959565	54969935	protein_coding	Ggct
479	ENSMUSG00000002799	1087.24	-0.02796	0.0806729	0.346585	0.728903	0.962012	12	112871439	112893396	protein_coding	Jag2
480	ENSMUSG00000002803	545.431	0.0990228	0.111323	-0.889508	0.37373	0.877628	12	112940102	112942565	protein_coding	Btbd6
481	ENSMUSG00000002804	104.427	-0.0450992	0.180094	0.250421	0.802262	0.975925	12	112897911	112905744	protein_coding	Nudt14
482	ENSMUSG00000002808	1507.04	0.0537344	0.0740777	-0.725378	0.46822	0.901076	13	19775876	19804097	protein_coding	Epdr1
483	ENSMUSG00000002812	1834.03	-0.0186801	0.0681002	0.274303	0.783852	0.970529	11	60604949	60618089	protein_coding	Flii
484	ENSMUSG00000002814	194.642	0.357758	0.135588	-2.63857	0.00832569	0.339268	11	60630884	60668191	protein_coding	Top3a
485	ENSMUSG00000002820	300.124	-0.0132321	0.11119	0.119004	0.905272	0.987251	9	21176589	21189068	protein_coding	Atg4d
486	ENSMUSG00000002825	172.285	-0.13019	0.140689	0.925373	0.354772	0.872056	9	21323133	21331570	protein_coding	Qtrt1
487	ENSMUSG00000002831	195.752	0.0944149	0.463395	-0.203746	0.838552	0.983277	17	56407591	56416803	protein_coding	Plin4
488	ENSMUSG00000002833	1247.71	0.0330195	0.0815329	-0.404984	0.685489	0.94774	17	56386634	56407607	protein_coding	Hdgfl2
489	ENSMUSG00000002835	46.0794	0.49868	0.281622	-1.77074	0.0766033	NA	17	56347439	56379289	protein_coding	Chaf1a
490	ENSMUSG00000002844	1215.9	-0.0319392	0.071835	0.444618	0.656596	0.942039	16	38264392	38273065	protein_coding	Adprh
491	ENSMUSG00000002845	181.688	0.165212	0.183513	-0.900271	0.367976	0.876685	16	38379060	38412524	protein_coding	Tmem39a
492	ENSMUSG00000002846	233.159	-0.0437555	0.142705	0.306616	0.759136	0.968433	16	38318709	38343025	protein_coding	Timmdc1
493	ENSMUSG00000002847	10.0923	0.0101789	0.501946	-0.0202788	0.983821	NA	16	38216479	38253507	protein_coding	Pla1a
494	ENSMUSG00000002870	66.1125	-0.0617763	0.238441	0.259084	0.79557	NA	6	88860456	88875762	protein_coding	Mcm2
495	ENSMUSG00000002871	577.35	0.126514	0.0912393	-1.38662	0.165559	0.779023	6	88879233	88889220	protein_coding	Tpra1
496	ENSMUSG00000002881	355.618	0.00571299	0.122729	-0.0465496	0.962872	0.995109	1	52496453	52539838	protein_coding	Nab1
497	ENSMUSG00000002885	130.572	0.276163	0.240946	-1.14616	0.251729	0.84014	8	84449880	84467955	protein_coding	Adgre5
498	ENSMUSG00000002897	93.0759	0.115794	0.189362	-0.611492	0.540874	0.913991	6	120440208	120464520	protein_coding	Il17ra
499	ENSMUSG00000002900	171.086	-0.0253502	0.192258	0.131855	0.895099	0.987047	12	31315233	31379643	protein_coding	Lamb1
500	ENSMUSG00000002908	99.5265	-0.00191445	0.225179	0.00850189	0.993217	0.998913	8	71294693	71315902	protein_coding	Kcnn1
501	ENSMUSG00000002910	152.287	0.20915	0.211093	-0.990796	0.321785	0.863892	8	71287773	71292364	protein_coding	Arrdc2
502	ENSMUSG00000002930	208.242	0.00925719	0.19211	-0.0481868	0.961567	0.994944	6	55994482	56009674	protein_coding	Ppp1r17
503	ENSMUSG00000002944	38.7304	-0.667192	0.379886	1.7563	0.0790377	NA	5	17986688	18093799	protein_coding	Cd36
504	ENSMUSG00000002948	1044.34	-0.046726	0.0904078	0.516836	0.60527	0.931689	8	4288740	4297897	protein_coding	Map2k7
505	ENSMUSG00000002949	843.887	0.0539578	0.0858789	-0.628301	0.529807	0.911447	8	4309731	4325913	protein_coding	Timm44
506	ENSMUSG00000002957	3079.63	0.00163735	0.0623703	-0.026252	0.979056	0.996496	7	141142086	141212924	protein_coding	Ap2a2
507	ENSMUSG00000002963	262.804	-0.0413453	0.12014	0.344142	0.730739	0.962012	7	44506563	44512416	protein_coding	Pnkp
508	ENSMUSG00000002968	946.507	0.0827683	0.108076	-0.765833	0.443776	0.891498	7	44526189	44542136	protein_coding	Med25
509	ENSMUSG00000002980	373.778	0.00489729	0.0996715	-0.0491343	0.960812	0.994944	7	19490056	19504941	protein_coding	Bcam
510	ENSMUSG00000002981	2911.51	0.000189207	0.0602918	-0.00313819	0.997496	0.999764	7	19365496	19398958	protein_coding	Clptm1
511	ENSMUSG00000002983	51.8672	-0.751953	0.32886	2.28654	0.0222226	NA	7	19340142	19363363	protein_coding	Relb
512	ENSMUSG00000002984	737.513	0.1077	0.0787334	-1.36791	0.17134	0.780662	7	19435238	19449363	protein_coding	Tomm40
513	ENSMUSG00000002985	21193.8	0.247517	0.0555686	-4.45426	8.4184e-06	0.0115444	7	19430034	19433113	protein_coding	Apoe
514	ENSMUSG00000002992	0	NA	NA	NA	NA	NA	7	19405504	19411866	protein_coding	Apoc2
515	ENSMUSG00000002996	300.05	-0.0360966	0.118393	0.304887	0.760452	0.968834	12	31976253	32000534	protein_coding	Hbp1
516	ENSMUSG00000002997	800.719	-0.153053	0.0741685	2.06359	0.0390568	0.536105	12	32008475	32111295	protein_coding	Prkar2b
517	ENSMUSG00000003031	683.821	0.0403797	0.0807804	-0.499871	0.617166	0.935987	6	134897364	134902476	protein_coding	Cdkn1b
518	ENSMUSG00000003032	29.7582	-0.250001	0.352717	0.708786	0.478457	NA	4	55527143	55532466	protein_coding	Klf4
519	ENSMUSG00000003033	1219.28	0.0857556	0.0836639	-1.025	0.305363	0.861438	8	72993862	73011229	protein_coding	Ap1m1
520	ENSMUSG00000003037	631.026	0.0945569	0.0941551	-1.00427	0.31525	0.863892	8	72915044	72937748	protein_coding	Rab8a
521	ENSMUSG00000003038	754.639	0.0456824	0.0761621	-0.599805	0.548636	0.915601	4	133692049	133695961	protein_coding	Hmgn2
522	ENSMUSG00000003039	1635.16	0.232558	0.0764775	-3.04086	0.00235901	0.194099	8	72973574	72978262	protein_coding	Fam32a
523	ENSMUSG00000003051	0.490523	16.9701	268.736	-0.0631477	0.949649	NA	1	135181313	135186306	protein_coding	Elf3
524	ENSMUSG00000003053	0	NA	NA	NA	NA	NA	19	39257849	39319157	protein_coding	Cyp2c29
525	ENSMUSG00000003062	648.01	-0.0192799	0.10597	0.181937	0.855632	0.984112	13	19541846	19579965	protein_coding	Stard3nl
526	ENSMUSG00000003068	785.673	-0.0220842	0.084244	0.262146	0.793209	0.972879	10	79951637	79966516	protein_coding	Stk11
527	ENSMUSG00000003070	76.9544	-0.0896239	0.220329	0.406772	0.684175	0.94774	10	80015316	80025844	protein_coding	Efna2
528	ENSMUSG00000003072	1280.89	0.105426	0.0693368	-1.52049	0.128388	0.74568	10	79974466	79981652	protein_coding	Atp5f1d
529	ENSMUSG00000003099	1424.92	0.0178777	0.0713971	-0.250398	0.80228	0.975925	7	16738565	16761849	protein_coding	Ppp5c
530	ENSMUSG00000003119	613.196	-0.0770919	0.0891821	0.864432	0.387351	0.880096	11	98093885	98169330	protein_coding	Cdk12
531	ENSMUSG00000003123	148.507	-0.00501872	0.152129	0.0329898	0.973683	0.995898	7	25078952	25098135	protein_coding	Lipe
532	ENSMUSG00000003131	3492.27	-0.0551252	0.0705925	0.780893	0.434865	0.888606	9	45874157	45923988	protein_coding	Pafah1b2
533	ENSMUSG00000003134	432.195	-0.0783066	0.114517	0.683797	0.494104	0.904829	1	39410573	39517836	protein_coding	Tbc1d8
534	ENSMUSG00000003135	363.899	0.0481238	0.100577	-0.478476	0.632312	0.938178	1	39574073	39585970	protein_coding	Cnot11
535	ENSMUSG00000003153	1678.1	-0.0595033	0.0713268	0.834234	0.404149	0.88333	6	122704768	122778599	protein_coding	Slc2a3
536	ENSMUSG00000003154	482.471	0.0665819	0.1008	-0.660536	0.50891	0.90713	6	122796873	122822325	protein_coding	Foxj2
537	ENSMUSG00000003161	676.565	0.0789164	0.11192	-0.705115	0.480739	0.901806	5	8096078	8119379	protein_coding	Sri
538	ENSMUSG00000003166	1747.68	0.00446828	0.0787326	-0.0567525	0.954742	0.994396	16	17657346	17716426	protein_coding	Dgcr2
539	ENSMUSG00000003184	275.593	0.0696825	0.134492	-0.518115	0.604378	0.931689	7	44647072	44652272	protein_coding	Irf3
540	ENSMUSG00000003190	15.2372	-0.403893	0.426185	0.947696	0.343284	NA	7	44640646	44648136	protein_coding	Bcl2l12
541	ENSMUSG00000003198	52.4724	-0.0967156	0.249392	0.387805	0.69816	NA	17	56199093	56205928	protein_coding	Zfp959
542	ENSMUSG00000003199	836.724	0.0175447	0.0862126	-0.203505	0.83874	0.983277	17	56312711	56323790	protein_coding	Mpnd
543	ENSMUSG00000003200	361.74	0.0935685	0.115655	-0.809031	0.418497	0.886392	17	56323750	56343635	protein_coding	Sh3gl1
544	ENSMUSG00000003206	3.6372	-1.46876	0.995722	1.47507	0.140194	NA	17	56259640	56264022	protein_coding	Ebi3
545	ENSMUSG00000003208	92.645	0.0483887	0.190277	-0.254306	0.799259	0.974173	17	56266099	56275285	protein_coding	Yju2
546	ENSMUSG00000003226	2205.27	-0.0515093	0.0758195	0.679367	0.496905	0.905187	10	58282742	58330178	protein_coding	Ranbp2
547	ENSMUSG00000003227	9.97285	1.21147	0.715441	-1.69332	0.0903952	NA	10	58436611	58511476	protein_coding	Edar
548	ENSMUSG00000003228	233.014	-0.108864	0.123434	0.881964	0.377796	0.878937	19	60878187	61084406	protein_coding	Grk5
549	ENSMUSG00000003233	791.566	-0.0208139	0.100229	0.207663	0.835492	0.982904	16	20335732	20352760	protein_coding	Dvl3
550	ENSMUSG00000003234	1310	0.18305	0.0685959	-2.66852	0.00761853	0.332547	16	20367327	20380129	protein_coding	Abcf3
551	ENSMUSG00000003235	725.066	0.164017	0.0912728	-1.797	0.0723357	0.655483	16	20317567	20328073	protein_coding	Eif2b5
552	ENSMUSG00000003269	631.383	9.77636e-05	0.081472	-0.00119997	0.999043	0.999957	7	45456061	45464005	protein_coding	Cyth2
553	ENSMUSG00000003271	56.3758	0.141392	0.244403	-0.57852	0.562913	NA	7	45379407	45434093	protein_coding	Sult2b1
554	ENSMUSG00000003273	551.603	0.0177574	0.0947756	-0.187363	0.851376	0.984112	7	45349267	45354106	protein_coding	Car11
555	ENSMUSG00000003279	1369.04	-0.0229902	0.0806902	0.28492	0.775706	0.970346	17	70276068	71128408	protein_coding	Dlgap1
556	ENSMUSG00000003282	66.7862	-0.405482	0.32998	1.22881	0.219144	NA	4	3900996	3938423	protein_coding	Plag1
557	ENSMUSG00000003283	22.8652	0.594306	0.380466	-1.56205	0.118277	NA	2	152950388	152993361	protein_coding	Hck
558	ENSMUSG00000003299	479.658	0.00604763	0.109381	-0.0552895	0.955908	0.99492	9	20914034	20920135	protein_coding	Mrpl4
559	ENSMUSG00000003308	751.004	0.0558521	0.0808242	-0.691031	0.489546	0.903054	9	21141026	21150657	protein_coding	Keap1
560	ENSMUSG00000003309	4.3308	-1.79076	0.854879	2.09476	0.0361925	NA	9	21205571	21223633	protein_coding	Ap1m2
561	ENSMUSG00000003316	5514.84	-0.02623	0.0641829	0.408676	0.682778	0.947697	8	111881053	111985848	protein_coding	Glg1
562	ENSMUSG00000003341	14.8871	-0.339813	0.422899	0.803532	0.421667	NA	10	80355418	80374958	protein_coding	Atp8b3
563	ENSMUSG00000003344	1120.02	0.039952	0.0765425	-0.521959	0.601699	0.931121	10	80478451	80492328	protein_coding	Btbd2
564	ENSMUSG00000003345	1572.09	0.120556	0.0672493	-1.79267	0.0730258	0.657872	10	80458672	80476583	protein_coding	Csnk1g2
565	ENSMUSG00000003346	453.448	-0.0410161	0.103731	0.395409	0.692541	0.95055	10	80419488	80426175	protein_coding	Abhd17a
566	ENSMUSG00000003348	319.087	0.0296195	0.10824	-0.273647	0.784356	0.970529	10	80521087	80537811	protein_coding	Mob3a
567	ENSMUSG00000003352	1184.43	-0.0281572	0.0783357	0.359443	0.719264	0.957716	15	98528721	98542410	protein_coding	Cacnb3
568	ENSMUSG00000003354	184.737	0.402453	0.154075	-2.61206	0.00899982	0.352622	15	98606088	98621217	protein_coding	Ccdc65
569	ENSMUSG00000003355	30.857	-0.192967	0.369159	0.522721	0.601168	NA	15	98622247	98626079	protein_coding	Fkbp11
570	ENSMUSG00000003360	1143.65	0.0056647	0.0730663	-0.0775281	0.938203	0.992473	15	98543015	98560775	protein_coding	Ddx23
571	ENSMUSG00000003363	6878.19	0.0319524	0.0665331	-0.480249	0.631051	0.938178	7	27231425	27252643	protein_coding	Pld3
572	ENSMUSG00000003378	2287.08	0.0152079	0.0627429	-0.242384	0.808483	0.977058	7	24709274	24771771	protein_coding	Grik5
573	ENSMUSG00000003379	13.0638	0.906818	0.500347	-1.81238	0.0699279	NA	7	24596806	24601622	protein_coding	Cd79a
574	ENSMUSG00000003380	1004.41	0.249523	0.0727908	-3.42794	0.00060817	0.0996214	7	24669177	24672179	protein_coding	Rabac1
575	ENSMUSG00000003382	630.034	-0.0215911	0.0945748	0.228297	0.819415	0.979774	3	87432714	87447463	protein_coding	Etv3
576	ENSMUSG00000003402	1323.84	-0.0787405	0.0668582	1.17772	0.238907	0.830896	9	21914102	21925518	protein_coding	Prkcsh
577	ENSMUSG00000003410	3347.17	-0.0835262	0.0639693	1.30572	0.191647	0.798819	9	21926301	21963319	protein_coding	Elavl3
578	ENSMUSG00000003411	1565.25	0.154558	0.0875178	-1.76602	0.0773932	0.668586	4	108736260	108800521	protein_coding	Rab3b
579	ENSMUSG00000003418	394.52	0.277784	0.284577	-0.976128	0.329001	0.866524	2	13655832	13798875	protein_coding	St8sia6
580	ENSMUSG00000003420	126.913	-0.0720554	0.175945	0.409533	0.682149	0.947464	7	44742414	44753275	protein_coding	Fcgrt
581	ENSMUSG00000003421	532.287	0.115243	0.0871391	-1.32252	0.185995	0.794376	7	44711853	44727634	protein_coding	Nosip
582	ENSMUSG00000003423	167.119	0.149208	0.16015	-0.931675	0.351504	0.870226	7	44803727	44809489	protein_coding	Pih1d1
583	ENSMUSG00000003429	1312.17	0.118539	0.0853384	-1.38904	0.164819	0.779023	7	44771803	44773863	protein_coding	Rps11
584	ENSMUSG00000003435	2298.33	0.0327971	0.0606116	-0.541102	0.588437	0.927374	7	28014316	28038171	protein_coding	Supt5
585	ENSMUSG00000003436	20.2665	0.23272	0.368269	-0.631929	0.527433	NA	7	27992978	28001663	protein_coding	Dll3
586	ENSMUSG00000003437	1034.12	0.00580683	0.0877394	-0.0661827	0.947232	0.993469	7	28092376	28098813	protein_coding	Paf1
587	ENSMUSG00000003438	365.691	0.135752	0.105191	-1.29053	0.196866	0.803743	7	28004941	28011497	protein_coding	Timm50
588	ENSMUSG00000003444	132.555	0.164845	0.198624	-0.829935	0.406576	0.88333	7	28085571	28092133	protein_coding	Med29
589	ENSMUSG00000003452	821.653	-0.110661	0.0846609	1.30711	0.191174	0.798738	6	149310384	149464827	protein_coding	Bicd1
590	ENSMUSG00000003458	1012.32	-0.00013286	0.0690145	0.0019251	0.998464	0.999957	1	171893580	171910362	protein_coding	Ncstn
591	ENSMUSG00000003464	981.603	-0.15282	0.0778587	1.96279	0.0496708	0.589259	1	171954322	171964060	protein_coding	Pex19
592	ENSMUSG00000003469	2982.14	0.0200927	0.0951143	-0.211248	0.832694	0.982508	14	70694916	70706272	protein_coding	Phyhip
593	ENSMUSG00000003476	122.269	-0.124648	0.231571	0.538272	0.590389	0.927782	6	55067034	55110001	protein_coding	Crhr2
594	ENSMUSG00000003477	8.60077	1.06513	0.610672	-1.74419	0.0811253	NA	6	55147611	55152028	protein_coding	Inmt
595	ENSMUSG00000003484	11.4218	-0.628205	0.521085	1.20557	0.227983	NA	8	72742326	72763470	protein_coding	Cyp4f18
596	ENSMUSG00000003500	569.279	-0.110456	0.0849799	1.29979	0.193673	0.801849	6	29200433	29216363	protein_coding	Impdh1
597	ENSMUSG00000003505	0	NA	NA	NA	NA	NA	7	18079347	18088934	protein_coding	Psg18
598	ENSMUSG00000003518	1002.78	-0.00172459	0.0692194	0.0249149	0.980123	0.996656	11	101861969	101877839	protein_coding	Dusp3
599	ENSMUSG00000003526	367.831	-0.0141135	0.100021	0.141106	0.887787	0.985802	16	17878221	17908067	protein_coding	Prodh
600	ENSMUSG00000003527	366.811	0.0798534	0.100309	-0.796071	0.425991	0.887111	16	17718573	17729212	protein_coding	Ess2
601	ENSMUSG00000003528	830.748	0.128634	0.0808382	-1.59126	0.111552	0.716796	16	17743087	17746083	protein_coding	Slc25a1
602	ENSMUSG00000003531	518.659	0.0762808	0.0876409	-0.870379	0.384093	0.879539	16	17870724	17889496	protein_coding	Dgcr6
603	ENSMUSG00000003534	1943.58	-0.0214141	0.121842	0.175754	0.860487	0.984112	17	35992459	36015513	protein_coding	Ddr1
604	ENSMUSG00000003541	82.8514	0.464034	0.205057	-2.26295	0.0236387	0.463657	17	36132576	36133815	protein_coding	Ier3
605	ENSMUSG00000003545	21.3043	-0.269066	0.390445	0.689128	0.490742	NA	7	19036621	19043976	protein_coding	Fosb
606	ENSMUSG00000003546	415.8	-0.00362958	0.122966	0.0295169	0.976452	0.99624	17	46941550	46956948	protein_coding	Klc4
607	ENSMUSG00000003549	204.111	0.215972	0.1452	-1.48741	0.136907	0.751736	7	19078703	19090449	protein_coding	Ercc1
608	ENSMUSG00000003555	0.916791	-0.849794	1.55913	0.545043	0.585724	NA	19	46655604	46661611	protein_coding	Cyp17a1
609	ENSMUSG00000003559	411.257	0.0695011	0.123464	-0.562927	0.573485	0.924522	19	46695897	46729538	protein_coding	As3mt
610	ENSMUSG00000003573	59.8673	-0.55083	0.238662	2.30799	0.0209996	NA	8	70735477	70747011	protein_coding	Homer3
611	ENSMUSG00000003575	2425.15	-0.00169992	0.0640896	0.0265241	0.978839	0.996496	8	70835005	70892229	protein_coding	Crtc1
612	ENSMUSG00000003581	474.045	0.0633387	0.0906919	-0.698394	0.484931	0.902651	11	4085202	4091172	protein_coding	Rnf215
613	ENSMUSG00000003585	371.839	0.182908	0.1152	-1.58775	0.112343	0.716796	11	4047039	4073415	protein_coding	Sec14l2
614	ENSMUSG00000003604	75.4043	-0.103249	0.319634	0.323022	0.746678	0.966131	2	112323309	112464918	protein_coding	Aven
615	ENSMUSG00000003617	214.941	0.376137	0.177274	-2.12179	0.0338557	0.517044	3	20011218	20063309	protein_coding	Cp
616	ENSMUSG00000003623	324.377	-0.019618	0.107257	0.182906	0.854872	0.984112	5	9016033	9047324	protein_coding	Crot
617	ENSMUSG00000003644	338.772	0.132953	0.123059	-1.0804	0.279965	0.851223	4	133574601	133615108	protein_coding	Rps6ka1
618	ENSMUSG00000003657	3217.27	-0.000857997	0.104137	0.00823914	0.993426	0.998913	8	110864134	110894842	protein_coding	Calb2
619	ENSMUSG00000003660	2593.56	0.0242786	0.0604178	-0.401846	0.687797	0.948653	2	127050306	127082371	protein_coding	Snrnp200
620	ENSMUSG00000003662	764.381	0.147234	0.0898957	-1.63783	0.101457	0.70246	2	127082858	127089736	protein_coding	Ciao1
621	ENSMUSG00000003665	65.9693	-0.249149	0.270268	0.921859	0.356602	NA	17	18063585	18075467	protein_coding	Has1
622	ENSMUSG00000003680	168.939	-0.026459	0.141685	0.186745	0.851861	0.984112	19	8751851	8763781	protein_coding	Taf6l
623	ENSMUSG00000003721	662.474	0.0988047	0.0882324	-1.11982	0.262789	0.845591	1	121232082	121260318	protein_coding	Insig2
624	ENSMUSG00000003731	1911.5	-0.00524873	0.0670931	0.0782306	0.937645	0.992473	4	129537773	129566560	protein_coding	Kpna6
625	ENSMUSG00000003746	248.25	-0.0794515	0.147887	0.537244	0.591099	0.927818	10	53780881	53952705	protein_coding	Man1a
626	ENSMUSG00000003752	83.8414	0.0863107	0.212532	-0.406107	0.684664	0.94774	7	26906597	26928086	protein_coding	Itpkc
627	ENSMUSG00000003762	420.692	0.159132	0.129051	-1.2331	0.217539	0.816566	7	26932448	26957375	protein_coding	Coq8b
628	ENSMUSG00000003778	1473.75	0.0197389	0.0648568	-0.304347	0.760864	0.969	18	34731668	34757654	protein_coding	Brd8
629	ENSMUSG00000003779	32.624	-0.158598	0.314553	0.504201	0.61412	NA	18	34757666	34766330	protein_coding	Kif20a
630	ENSMUSG00000003808	494.062	0.0733559	0.0892	-0.822375	0.410863	0.885124	8	85583618	85595886	protein_coding	Farsa
631	ENSMUSG00000003809	407.947	0.0505579	0.0953129	-0.530441	0.595806	0.928837	8	85613022	85620550	protein_coding	Gcdh
632	ENSMUSG00000003810	2538.35	-0.0384027	0.0618712	0.620689	0.534804	0.912814	4	116163959	116321471	protein_coding	Mast2
633	ENSMUSG00000003812	74.5436	0.0151547	0.235164	-0.064443	0.948617	0.993498	8	85635189	85649544	protein_coding	Dnase2a
634	ENSMUSG00000003813	748.34	-0.0238412	0.0758391	0.314366	0.753243	0.967557	8	85560648	85567294	protein_coding	Rad23a
635	ENSMUSG00000003814	4880.99	-0.0526227	0.0578332	0.909904	0.362873	0.876434	8	85568479	85573563	protein_coding	Calr
636	ENSMUSG00000003824	37.476	0.011746	0.28368	-0.0414059	0.966972	NA	8	85598740	85614850	protein_coding	Syce2
637	ENSMUSG00000003847	2102.05	-0.209108	0.10564	1.97944	0.0477669	0.580827	8	108020102	108106149	protein_coding	Nfat5
638	ENSMUSG00000003848	357.886	0.143152	0.103684	-1.38066	0.167384	0.780037	8	108139118	108151683	protein_coding	Nob1
639	ENSMUSG00000003849	72.6581	0.36806	0.218206	-1.68676	0.0916504	0.684715	8	108114857	108129838	protein_coding	Nqo1
640	ENSMUSG00000003863	1720.01	-0.06535	0.0664002	0.984184	0.325025	0.863892	7	44988546	45016443	protein_coding	Ppfia3
641	ENSMUSG00000003865	316.371	0.0619669	0.108787	-0.569618	0.568937	0.922224	7	45084268	45106043	protein_coding	Gys1
642	ENSMUSG00000003868	449.186	-0.0162472	0.131775	0.123295	0.901873	0.987055	7	45071184	45087520	protein_coding	Ruvbl2
643	ENSMUSG00000003872	115.198	0.105979	0.171281	-0.618744	0.536085	0.913201	7	45017315	45020007	protein_coding	Lin7b
644	ENSMUSG00000003873	181.282	0.128973	0.138181	-0.933363	0.350633	0.870226	7	45111121	45116322	protein_coding	Bax
645	ENSMUSG00000003882	6.17075	-0.195307	0.69449	0.281224	0.778538	NA	15	9505874	9530262	protein_coding	Il7r
646	ENSMUSG00000003923	556.707	0.145157	0.0982716	-1.4771	0.139648	0.754201	10	71061294	71074110	protein_coding	Tfam
647	ENSMUSG00000003929	315.842	-0.0234029	0.113997	0.205294	0.837343	0.983277	17	33548316	33577852	protein_coding	Zfp81
648	ENSMUSG00000003934	2947.79	0.0435399	0.0625883	-0.695656	0.486644	0.902651	11	69444918	69451031	protein_coding	Efnb3
649	ENSMUSG00000003948	713.109	0.0334544	0.0870302	-0.3844	0.700682	0.95204	11	90140282	90169415	protein_coding	Mmd
650	ENSMUSG00000003949	1622.54	0.0240464	0.0735267	-0.327044	0.743635	0.965195	11	90227362	90281721	protein_coding	Hlf
651	ENSMUSG00000003955	247.868	0.189629	0.142618	-1.32964	0.183638	0.791435	16	35864131	35891964	protein_coding	Fam162a
652	ENSMUSG00000003970	4250.89	0.12709	0.0694344	-1.83036	0.0671967	0.637198	15	76788278	76790514	protein_coding	Rpl8
653	ENSMUSG00000003974	378.262	0.174074	0.13832	-1.25849	0.208215	0.808866	5	9535541	9775170	protein_coding	Grm3
654	ENSMUSG00000003992	799.326	-0.0615713	0.0781021	0.788345	0.430495	0.88836	13	91608402	91851548	protein_coding	Ssbp2
655	ENSMUSG00000004018	106.133	-0.0750674	0.177802	0.422198	0.672881	0.945373	11	26336135	26421876	protein_coding	Fancl
656	ENSMUSG00000004031	905.407	-0.0178199	0.103534	0.172117	0.863346	0.984112	1	158072839	158183896	protein_coding	Brinp2
657	ENSMUSG00000004032	1142.07	0.153235	0.080943	-1.89313	0.0583409	0.618295	3	107803137	107806002	protein_coding	Gstm5
658	ENSMUSG00000004035	567.137	0.126225	0.103464	-1.21999	0.222468	0.820544	3	107833650	107839133	protein_coding	Gstm7
659	ENSMUSG00000004038	0.592417	-2.08422	1.7739	1.17493	0.240022	NA	3	107871012	107876599	protein_coding	Gstm3
660	ENSMUSG00000004040	1217.49	0.0568562	0.0713383	-0.796993	0.425455	0.887065	11	100775924	100830366	protein_coding	Stat3
661	ENSMUSG00000004043	90.793	0.363442	0.228955	-1.5874	0.112423	0.716796	11	100750177	100775995	protein_coding	Stat5a
662	ENSMUSG00000004044	300.698	0.274818	0.184002	-1.49356	0.13529	0.751036	11	100847559	100861713	protein_coding	Cavin1
663	ENSMUSG00000004054	342.783	-0.0320944	0.122319	0.262383	0.793026	0.972879	19	5738770	5752893	protein_coding	Map3k11
664	ENSMUSG00000004056	600.255	0.0328325	0.135184	-0.242873	0.808104	0.977058	7	27290977	27340251	protein_coding	Akt2
665	ENSMUSG00000004069	1021.65	-0.110946	0.0795137	1.39531	0.162922	0.777608	16	4457853	4525559	protein_coding	Dnaja3
666	ENSMUSG00000004070	706.285	-0.0295123	0.0950133	0.310612	0.756095	0.96777	16	4544225	4584606	protein_coding	Hmox2
667	ENSMUSG00000004071	3836.9	0.0164348	0.0618704	-0.265633	0.790522	0.971786	16	4568212	4608156	protein_coding	Cdip1
668	ENSMUSG00000004085	121.414	-0.226467	0.165971	1.3645	0.17241	0.782572	2	72115981	72272954	protein_coding	Map3k20
669	ENSMUSG00000004096	735.981	0.0882793	0.0976885	-0.903681	0.366164	0.876685	9	14411913	14421873	protein_coding	Cwc15
670	ENSMUSG00000004098	290.818	0.135942	0.530388	-0.256307	0.797714	0.974033	9	20681346	20726363	protein_coding	Col5a3
671	ENSMUSG00000004099	1483.52	-0.0256756	0.0682657	0.376113	0.706833	0.952893	9	20818505	20871184	protein_coding	Dnmt1
672	ENSMUSG00000004100	214.767	0.0523565	0.129131	-0.405453	0.685144	0.94774	9	20799471	20803474	protein_coding	Ppan
673	ENSMUSG00000004105	83.4931	-0.223777	0.302835	0.73894	0.459943	0.89851	2	33106081	33137729	protein_coding	Angptl2
674	ENSMUSG00000004110	5503.75	-0.206607	0.0609436	3.39013	0.000698594	0.102643	1	154266477	154760247	protein_coding	Cacna1e
675	ENSMUSG00000004113	2990.78	-0.209336	0.0590975	3.54222	0.000396778	0.0888199	2	24493899	24653164	protein_coding	Cacna1b
676	ENSMUSG00000004127	109.985	0.199777	0.197969	-1.00913	0.312911	0.863714	3	137849209	137865582	protein_coding	Trmt10a
677	ENSMUSG00000004151	386.901	-0.132306	0.103588	1.27723	0.20152	0.805358	12	38829379	38920483	protein_coding	Etv1
678	ENSMUSG00000004187	3340.47	-0.0175678	0.0620232	0.283245	0.776989	0.970346	15	76544058	76552396	protein_coding	Kifc2
679	ENSMUSG00000004207	20138	0.0538728	0.0657559	-0.819284	0.412625	0.885774	10	60113449	60138376	protein_coding	Psap
680	ENSMUSG00000004221	788.364	0.010264	0.0768118	-0.133625	0.893699	0.986724	X	73436896	73497460	protein_coding	Ikbkg
681	ENSMUSG00000004231	33.522	0.038499	0.386852	-0.0995186	0.920727	NA	19	44735057	44826310	protein_coding	Pax2
682	ENSMUSG00000004233	122.655	0.0406949	0.200975	-0.202487	0.839536	0.98342	3	99048384	99146502	protein_coding	Wars2
683	ENSMUSG00000004263	241.01	0.0617808	0.165623	-0.373021	0.709133	0.953597	6	124719507	124733487	protein_coding	Atn1
684	ENSMUSG00000004264	500.666	0.0869895	0.0926401	-0.939005	0.347728	0.870226	6	124689299	124693913	protein_coding	Phb2
685	ENSMUSG00000004266	43.7224	0.157664	0.290485	-0.542761	0.587295	NA	6	124697670	124715677	protein_coding	Ptpn6
686	ENSMUSG00000004267	11319.4	0.0758901	0.0732404	-1.03618	0.300119	0.857898	6	124737016	124746636	protein_coding	Eno2
687	ENSMUSG00000004268	378.026	-0.0570577	0.100328	0.568714	0.56955	0.922375	6	124681048	124689141	protein_coding	Emg1
688	ENSMUSG00000004270	316.973	-0.0203155	0.108954	0.18646	0.852084	0.984112	6	124639990	124681381	protein_coding	Lpcat3
689	ENSMUSG00000004285	972.552	0.057144	0.0879892	-0.649444	0.516052	0.908355	6	29467717	29470511	protein_coding	Atp6v1f
690	ENSMUSG00000004296	0	NA	NA	NA	NA	NA	11	44290890	44304860	protein_coding	Il12b
691	ENSMUSG00000004317	969.559	-0.0344025	0.0760379	0.45244	0.650952	0.94127	X	7020049	7185597	protein_coding	Clcn5
692	ENSMUSG00000004319	3289.92	-0.0180444	0.0650967	0.277194	0.781631	0.970457	8	61363423	61436334	protein_coding	Clcn3
693	ENSMUSG00000004328	186.807	-0.150335	0.447778	0.335734	0.737071	0.96202	7	16765432	16796352	protein_coding	Hif3a
694	ENSMUSG00000004341	0.934624	-2.54213	1.75119	1.45165	0.146598	NA	13	21496295	21503794	protein_coding	Gpx6
695	ENSMUSG00000004344	0	NA	NA	NA	NA	NA	13	21470599	21476901	protein_coding	Gpx5
696	ENSMUSG00000004347	258.214	-0.208624	0.198806	1.04938	0.294002	0.855484	6	56046789	56629472	protein_coding	Pde1c
697	ENSMUSG00000004356	516.277	-0.105653	0.091747	1.15157	0.249499	0.839422	10	88582469	88662666	protein_coding	Utp20
698	ENSMUSG00000004359	0.367892	16.5966	271.264	-0.0611823	0.951214	NA	10	88510634	88520877	protein_coding	Spic
699	ENSMUSG00000004360	1032.79	-0.182071	0.0880687	2.06737	0.0386989	0.536105	10	29087602	29106775	protein_coding	9330159F19Rik
700	ENSMUSG00000004364	1980.65	-0.000368812	0.0627092	0.0058813	0.995307	0.999367	1	80242640	80318197	protein_coding	Cul3
701	ENSMUSG00000004366	2212.97	0.192878	0.378526	-0.50955	0.610367	0.932932	16	23708323	23709708	protein_coding	Sst
702	ENSMUSG00000004371	3.93529	-1.12011	0.834608	1.34208	0.179571	NA	7	4775372	4785858	protein_coding	Il11
703	ENSMUSG00000004383	916.872	-0.112747	0.112515	1.00207	0.316312	0.863892	8	73541227	74080168	protein_coding	Large1
704	ENSMUSG00000004393	524.75	0.0572063	0.101536	-0.56341	0.573156	0.924522	11	6208919	6217772	protein_coding	Ddx56
705	ENSMUSG00000004394	1275.49	0.0558346	0.0671868	-0.831036	0.405953	0.88333	11	6220369	6224870	protein_coding	Tmed4
706	ENSMUSG00000004415	107.65	-0.0515499	0.220196	0.234109	0.8149	0.978781	5	136770613	136912063	protein_coding	Col26a1
707	ENSMUSG00000004446	220.785	-0.234563	0.204778	1.14545	0.252023	0.840439	6	120868891	120893814	protein_coding	Bid
708	ENSMUSG00000004451	182.591	-0.00944075	0.176365	0.0535296	0.95731	0.99492	1	119398035	119432524	protein_coding	Ralb
709	ENSMUSG00000004455	880.887	0.0341024	0.0782395	-0.435872	0.662929	0.943784	5	122296341	122313336	protein_coding	Ppp1cc
710	ENSMUSG00000004460	513.433	-0.178221	0.0969965	1.8374	0.0661506	0.637198	16	22676595	22698384	protein_coding	Dnajb11
711	ENSMUSG00000004462	230.328	0.0193505	0.124762	-0.1551	0.876743	0.984532	16	22631964	22676419	protein_coding	Tbccd1
712	ENSMUSG00000004473	34.5222	-0.0552164	0.331342	0.166645	0.867649	NA	7	43952111	43956326	protein_coding	Clec11a
713	ENSMUSG00000004500	172.483	-0.123954	0.140769	0.880549	0.378562	0.879147	7	12699765	12708163	protein_coding	Zfp324
714	ENSMUSG00000004508	534.661	0.0132058	0.0932892	-0.141558	0.88743	0.985683	7	96730793	96958153	protein_coding	Gab2
715	ENSMUSG00000004530	1491.01	-0.0161878	0.0748114	0.216381	0.828691	0.981196	5	113980497	114046819	protein_coding	Coro1c
716	ENSMUSG00000004535	2079.68	-0.00936143	0.0633824	0.147698	0.882581	0.984987	6	52690714	52743765	protein_coding	Tax1bp1
717	ENSMUSG00000004540	0.981774	1.12844	2.05905	-0.548041	0.583663	NA	7	18547862	18555532	protein_coding	Psg17
718	ENSMUSG00000004542	0	NA	NA	NA	NA	NA	7	18523492	18532445	protein_coding	Psg19
719	ENSMUSG00000004552	2.01059	-3.239	1.78445	1.81513	0.0695038	NA	1	131566044	131603243	protein_coding	Ctse
720	ENSMUSG00000004558	16175.8	0.0379192	0.065472	-0.579166	0.562477	0.92114	14	52142728	52151615	protein_coding	Ndrg2
721	ENSMUSG00000004561	392.654	-0.100026	0.139023	0.71949	0.471839	0.901076	14	52122299	52130496	protein_coding	Mettl17
722	ENSMUSG00000004562	1109.9	0.0049073	0.0802625	-0.0611406	0.951247	0.993611	14	52222176	52243708	protein_coding	Arhgef40
723	ENSMUSG00000004565	1505.08	-0.0758039	0.065335	1.16023	0.245953	0.836703	8	3565384	3594267	protein_coding	Pnpla6
724	ENSMUSG00000004567	971.728	0.0850517	0.0793035	-1.07248	0.283503	0.85266	8	3550457	3565232	protein_coding	Mcoln1
725	ENSMUSG00000004568	994.094	0.0987238	0.0719114	-1.37285	0.169798	0.780037	8	3403415	3506601	protein_coding	Arhgef18
726	ENSMUSG00000004591	513.566	-0.150957	0.33506	0.450539	0.652322	0.94127	3	142496663	142587765	protein_coding	Pkn2
727	ENSMUSG00000004609	102.274	0.0995627	0.183492	-0.5426	0.587405	0.927302	7	43173640	43193852	protein_coding	Cd33
728	ENSMUSG00000004610	27.5917	0.18915	0.350464	-0.539714	0.589394	NA	7	43093507	43107224	protein_coding	Etfb
729	ENSMUSG00000004612	1.7649	1.18179	1.34331	-0.879755	0.378992	NA	7	43086497	43087673	protein_coding	Nkg7
730	ENSMUSG00000004626	364.747	-0.398438	0.13696	2.90915	0.0036241	0.232054	8	3680955	3693644	protein_coding	Stxbp2
731	ENSMUSG00000004630	1.43723	0.560637	1.35334	-0.41426	0.678684	NA	8	3673371	3675545	protein_coding	Pcp2
732	ENSMUSG00000004631	478.441	0.178177	0.0970048	-1.83678	0.0662421	0.637198	6	4674350	4747207	protein_coding	Sgce
733	ENSMUSG00000004633	510.857	0.0190788	0.109414	-0.174373	0.861573	0.984112	6	54016539	54278795	protein_coding	Chn2
734	ENSMUSG00000004637	417.621	0.214868	0.116401	-1.84594	0.0649015	0.635482	8	115166395	116079447	protein_coding	Wwox
735	ENSMUSG00000004642	412.265	0.01235	0.109632	-0.112649	0.910309	0.987652	5	33792296	33809918	protein_coding	Slbp
736	ENSMUSG00000004651	0.736814	-1.09789	1.48183	0.7409	0.458754	NA	7	87073979	87142720	protein_coding	Tyr
737	ENSMUSG00000004654	0.122631	15.3187	280.474	-0.0546173	0.956443	NA	6	55353280	55365515	protein_coding	Ghrhr
738	ENSMUSG00000004655	10.6706	0.435496	0.561287	-0.775888	0.437815	NA	6	55313417	55325540	protein_coding	Aqp1
739	ENSMUSG00000004661	85.074	0.274521	0.211871	-1.2957	0.195079	0.803128	9	57697636	57744076	protein_coding	Arid3b
740	ENSMUSG00000004665	70.8842	0.129836	0.219825	-0.590632	0.554767	0.918292	10	79824418	79831896	protein_coding	Cnn2
741	ENSMUSG00000004667	507.661	0.186608	0.0964533	-1.9347	0.0530271	0.602634	10	79871783	79875629	protein_coding	Polr2e
742	ENSMUSG00000004668	18.9308	0.322977	0.50022	-0.645671	0.518493	NA	11	9141942	9634259	protein_coding	Abca13
743	ENSMUSG00000004677	1276.17	-0.160415	0.0854328	1.87768	0.0604253	0.624074	8	71725358	71813357	protein_coding	Myo9b
744	ENSMUSG00000004698	625.157	0.0077109	0.119353	-0.0646056	0.948488	0.993498	12	34097579	34967094	protein_coding	Hdac9
745	ENSMUSG00000004707	3.63645	-0.261738	1.04103	0.251423	0.801487	NA	1	171416192	171434978	protein_coding	Ly9
746	ENSMUSG00000004709	0.978312	-0.848958	1.38851	0.611419	0.540922	NA	1	171386761	171437314	protein_coding	Cd244a
747	ENSMUSG00000004730	43.1063	0.217254	0.277016	-0.784265	0.432885	NA	17	57665691	57790527	protein_coding	Adgre1
748	ENSMUSG00000004748	576.401	0.0538967	0.0954999	-0.564364	0.572506	0.924247	11	4041480	4045445	protein_coding	Mtfp1
749	ENSMUSG00000004768	528.86	0.0188705	0.105868	-0.178245	0.85853	0.984112	1	33758968	33781645	protein_coding	Rab23
750	ENSMUSG00000004771	1399.91	-0.00832771	0.077149	0.107943	0.914041	0.988233	9	64622581	64645040	protein_coding	Rab11a
751	ENSMUSG00000004788	409.363	0.216908	0.0953938	-2.27382	0.0229768	0.460261	12	85266255	85273402	protein_coding	Eif2b2
752	ENSMUSG00000004789	1637.87	-0.0120576	0.0677618	0.177941	0.858769	0.984112	12	85157607	85181619	protein_coding	Dlst
753	ENSMUSG00000004791	83.5515	-0.0358229	0.210791	0.169945	0.865053	0.984112	12	85213409	85224564	protein_coding	Pgf
754	ENSMUSG00000004798	1286.15	-0.0545222	0.0695593	0.783822	0.433144	0.888606	11	61666475	61745899	protein_coding	Ulk2
755	ENSMUSG00000004814	2.28999	2.04032	1.49635	-1.36354	0.172714	NA	5	135598791	135601903	protein_coding	Ccl24
756	ENSMUSG00000004815	855.463	-0.0119848	0.0774725	0.154698	0.87706	0.984532	5	108794559	108817538	protein_coding	Dgkq
757	ENSMUSG00000004821	0	NA	NA	NA	NA	NA	5	108925101	108943229	protein_coding	Tmed11
758	ENSMUSG00000004837	32.0551	0.443638	0.332048	-1.33607	0.181528	NA	11	61544091	61563610	protein_coding	Grap
759	ENSMUSG00000004842	0.127384	-14.5895	197.79	0.0737623	0.9412	NA	16	65317397	65331183	protein_coding	Pou1f1
760	ENSMUSG00000004843	469.989	0.0235627	0.113602	-0.207415	0.835686	0.982907	16	65336014	65359612	protein_coding	Chmp2b
761	ENSMUSG00000004846	507.583	-0.00398189	0.108998	0.0365317	0.970858	0.995795	5	137015873	137025502	protein_coding	Plod3
762	ENSMUSG00000004849	1302.94	0.127311	0.0848539	-1.50036	0.133522	0.75008	5	137063847	137074989	protein_coding	Ap1s1
763	ENSMUSG00000004864	2.31242	1.24113	1.31942	-0.94066	0.346879	NA	17	28988271	28999207	protein_coding	Mapk13
764	ENSMUSG00000004865	1030.48	-0.00276276	0.0769134	0.0359204	0.971346	0.995795	17	28806622	28841683	protein_coding	Srpk1
765	ENSMUSG00000004872	0	NA	NA	NA	NA	NA	1	78077904	78173771	protein_coding	Pax3
766	ENSMUSG00000004880	216.421	0.172382	0.14173	-1.21627	0.223883	0.820603	1	181642900	181670611	protein_coding	Lbr
767	ENSMUSG00000004885	9.2983	1.6264	0.598146	-2.71907	0.00654665	NA	3	87855973	87860683	protein_coding	Crabp2
768	ENSMUSG00000004891	193.261	0.192759	0.231224	-0.833645	0.404481	0.88333	3	87878385	87887758	protein_coding	Nes
769	ENSMUSG00000004892	3680.67	-0.0128078	0.0682933	0.18754	0.851237	0.984112	3	87894838	87907537	protein_coding	Bcan
770	ENSMUSG00000004894	277.652	-0.249535	0.20988	1.18894	0.234464	0.826076	3	87929057	87934890	protein_coding	Hapln2
771	ENSMUSG00000004895	592.92	0.0782134	0.0837808	-0.933548	0.350537	0.870226	3	87766210	87792915	protein_coding	Prcc
772	ENSMUSG00000004896	504.666	-0.000736442	0.113785	0.0064722	0.994836	0.999367	3	87829908	87838024	protein_coding	Mettl25b
773	ENSMUSG00000004897	1956.65	0.115818	0.0616709	-1.878	0.0603817	0.624074	3	87813628	87823439	protein_coding	Hdgf
774	ENSMUSG00000004902	1668.74	0.165373	0.0805403	-2.05329	0.0400441	0.543701	6	120750539	120771297	protein_coding	Slc25a18
775	ENSMUSG00000004929	500.786	-0.155797	0.111011	1.40344	0.160487	0.776013	10	80905869	80918393	protein_coding	Thop1
776	ENSMUSG00000004931	220.462	0.0238853	0.134419	-0.177693	0.858964	0.984112	10	81102794	81109080	protein_coding	Apba3
777	ENSMUSG00000004933	1460.71	0.0354113	0.0818967	-0.432389	0.665458	0.944576	10	81088769	81099199	protein_coding	Matk
778	ENSMUSG00000004934	186.962	-0.0239738	0.148481	0.16146	0.871731	0.984427	10	80989100	81003757	protein_coding	Pias4
779	ENSMUSG00000004936	2701.54	-0.0409601	0.0724151	0.565629	0.571646	0.923507	9	64093052	64160913	protein_coding	Map2k1
780	ENSMUSG00000004937	1864.4	0.1136	0.062029	-1.83141	0.0670396	0.637198	10	80879909	80896015	protein_coding	Sgta
781	ENSMUSG00000004939	0.84669	-1.40118	1.47458	0.95022	0.342001	NA	10	81034004	81037885	protein_coding	Nmrk2
782	ENSMUSG00000004945	489.649	0.0848656	0.0894741	-0.948494	0.342878	0.870226	17	5461145	5490534	protein_coding	Tmem242
783	ENSMUSG00000004947	137.128	-0.0570866	0.184464	0.309473	0.756962	0.967828	5	136023654	136061726	protein_coding	Dtx2
784	ENSMUSG00000004948	2.40972	1.16152	1.15606	-1.00472	0.31503	NA	5	136008953	136017478	protein_coding	Zp3
785	ENSMUSG00000004951	20.0634	1.22747	0.420076	-2.92201	0.00347783	NA	5	135916773	135918417	protein_coding	Hspb1
786	ENSMUSG00000004952	436.9	-0.123691	0.384907	0.321353	0.747943	0.966183	5	136112770	136140714	protein_coding	Rasa4
787	ENSMUSG00000004961	1903.17	-0.0553313	0.100792	0.548966	0.583029	0.92657	7	4542764	4550540	protein_coding	Syt5
788	ENSMUSG00000004980	6306.8	-0.00155522	0.0617926	0.0251683	0.979921	0.996636	6	51437912	51446874	protein_coding	Hnrnpa2b1
789	ENSMUSG00000004988	15.79	-0.618231	0.487463	1.26826	0.204704	NA	6	117910520	117914653	protein_coding	Fxyd4
790	ENSMUSG00000004994	151.775	0.266873	0.152095	-1.75464	0.0793204	0.671628	8	84984424	84997009	protein_coding	Yju2b
791	ENSMUSG00000004996	234.366	0.06887	0.13891	-0.495789	0.620043	0.936687	8	84976535	84983955	protein_coding	Mri1
792	ENSMUSG00000005034	11247.4	-0.00615462	0.0899942	0.0683891	0.945476	0.993119	3	146435329	146518745	protein_coding	Prkacb
793	ENSMUSG00000005043	247.836	-0.0293086	0.135659	0.216046	0.828952	0.981196	11	119234251	119246362	protein_coding	Sgsh
794	ENSMUSG00000005045	6760.23	-0.0816595	0.0664746	1.22843	0.219285	0.816909	4	152423108	152474651	protein_coding	Chd5
795	ENSMUSG00000005054	230.352	-0.0623596	0.13274	0.469789	0.638506	0.938178	10	78261503	78263456	protein_coding	Cstb
796	ENSMUSG00000005057	160.276	-0.0258521	0.149796	0.172581	0.86298	0.984112	5	136247001	136275410	protein_coding	Sh2b2
797	ENSMUSG00000005069	767.992	0.0315531	0.0915702	-0.344578	0.730411	0.962012	6	124373775	124392026	protein_coding	Pex5
798	ENSMUSG00000005078	567.615	-0.044143	0.0902425	0.489159	0.624729	0.938178	12	72132363	72148235	protein_coding	Jkamp
799	ENSMUSG00000005087	49.3513	-0.864037	0.428294	2.01739	0.0436546	NA	2	102641486	102732010	protein_coding	Cd44
800	ENSMUSG00000005089	18641.7	-0.122598	0.0700434	1.75031	0.0800645	0.672533	2	102489004	102621129	protein_coding	Slc1a2
801	ENSMUSG00000005102	719.119	-0.0623492	0.0799615	0.77974	0.435544	0.888606	2	118219099	118305715	protein_coding	Eif2ak4
802	ENSMUSG00000005103	2878.72	0.0772185	0.0619175	-1.24712	0.212354	0.810162	5	38684156	38720564	protein_coding	Wdr1
803	ENSMUSG00000005107	28.768	0.328263	0.317893	-1.03262	0.301781	NA	5	38506616	38660486	protein_coding	Slc2a9
804	ENSMUSG00000005124	3.53208	0.91779	0.850476	-1.07915	0.280521	NA	15	66763169	66795050	protein_coding	Ccn4
805	ENSMUSG00000005125	1675.04	0.136197	0.257153	-0.529635	0.596365	0.9291	15	66801167	66841489	protein_coding	Ndrg1
806	ENSMUSG00000005131	10.7342	0.115462	0.56447	-0.20455	0.837924	NA	9	53313625	53345702	protein_coding	4930550C14Rik
807	ENSMUSG00000005142	682.94	-0.0492157	0.0939798	0.523684	0.600498	0.930479	8	85809899	85824911	protein_coding	Man2b1
808	ENSMUSG00000005148	163.663	0.118536	0.172085	-0.688824	0.490934	0.903085	14	99536127	99552472	protein_coding	Klf5
809	ENSMUSG00000005150	289.671	0.123979	0.125572	-0.987308	0.323492	0.863892	8	85801664	85807935	protein_coding	Wdr83
810	ENSMUSG00000005161	1849.06	0.0438614	0.0664026	-0.660538	0.508909	0.90713	8	85696216	85701463	protein_coding	Prdx2
811	ENSMUSG00000005198	2531.6	0.0569385	0.0601955	-0.945893	0.344203	0.870226	11	69624823	69649463	protein_coding	Polr2a
812	ENSMUSG00000005202	0.122631	15.3187	280.474	-0.0546173	0.956443	NA	11	69505630	69508731	protein_coding	Shbg
813	ENSMUSG00000005204	870.924	0.0174826	0.0796121	-0.219597	0.826185	0.981196	11	69563941	69572910	protein_coding	Senp3
814	ENSMUSG00000005220	26.797	0.337284	0.379242	-0.889363	0.373808	NA	5	72457368	72661816	protein_coding	Corin
815	ENSMUSG00000005225	320.005	0.0391933	0.126473	-0.309894	0.756642	0.96777	6	54572096	54622824	protein_coding	Plekha8
816	ENSMUSG00000005232	0.21007	15.3644	280.128	-0.0548479	0.95626	NA	2	69041417	69058185	protein_coding	G6pc2
817	ENSMUSG00000005233	6.70483	-1.52375	0.761325	2.00144	0.0453446	NA	2	69024239	69036538	protein_coding	Spc25
818	ENSMUSG00000005237	384.59	-0.0588073	0.478286	0.122954	0.902143	0.987055	11	69311635	69439936	protein_coding	Dnah2
819	ENSMUSG00000005251	15.4766	0.539872	0.416064	-1.29757	0.194436	NA	16	97543133	97564987	protein_coding	Ripk4
820	ENSMUSG00000005262	1238.73	0.0448184	0.0797562	-0.561943	0.574155	0.924522	16	18630529	18654011	protein_coding	Ufd1
821	ENSMUSG00000005267	340.366	-0.0335225	0.104949	0.319417	0.749411	0.966378	11	62591182	62622731	protein_coding	Zfp287
822	ENSMUSG00000005268	964.264	-0.360146	0.290276	1.2407	0.214716	0.814249	15	10177324	10349266	protein_coding	Prlr
823	ENSMUSG00000005299	1338.09	-0.00168756	0.0766347	0.0220209	0.982431	0.997479	5	33897017	33940161	protein_coding	Letm1
824	ENSMUSG00000005312	2853.36	0.0243334	0.0641602	-0.37926	0.704495	0.952574	13	58323970	58363467	protein_coding	Ubqln1
825	ENSMUSG00000005320	3.69821	-0.798338	0.841896	0.948263	0.342996	NA	13	55300453	55316572	protein_coding	Fgfr4
826	ENSMUSG00000005338	5814.41	0.0203496	0.0753862	-0.269938	0.787208	0.970796	1	173160825	173195261	protein_coding	Cadm3
827	ENSMUSG00000005339	0	NA	NA	NA	NA	NA	1	173048851	173054781	protein_coding	Fcer1a
828	ENSMUSG00000005354	1188.77	0.169107	0.0786569	-2.14993	0.0315609	0.507676	15	77799247	77813206	protein_coding	Txn2
829	ENSMUSG00000005355	0	NA	NA	NA	NA	NA	10	78547825	78554128	protein_coding	Casp14
830	ENSMUSG00000005357	309.928	0.0634747	0.13841	-0.458599	0.646522	0.940521	10	78616330	78650599	protein_coding	Slc1a6
831	ENSMUSG00000005360	12745.7	0.0473812	0.0558461	-0.848425	0.396201	0.882952	15	8663608	8740248	protein_coding	Slc1a3
832	ENSMUSG00000005362	819.172	0.0646431	0.0850505	-0.760056	0.447221	0.892028	6	106757162	106777038	protein_coding	Crbn
833	ENSMUSG00000005364	0.952327	-2.82461	1.78221	1.58489	0.112992	NA	6	106687318	106725998	protein_coding	Il5ra
834	ENSMUSG00000005370	397.741	0.238226	0.102328	-2.32807	0.0199084	0.440301	17	88282490	88298320	protein_coding	Msh6
835	ENSMUSG00000005371	2000.43	-0.0549666	0.0641427	0.856943	0.391477	0.88157	17	88298287	88372719	protein_coding	Fbxo11
836	ENSMUSG00000005373	50.4635	0.026931	0.312998	-0.0860421	0.931433	NA	5	135118744	135167236	protein_coding	Mlxipl
837	ENSMUSG00000005374	448.344	0.0332645	0.0922463	-0.360605	0.718394	0.957555	5	135178511	135194614	protein_coding	Tbl2
838	ENSMUSG00000005378	334.725	-0.0787219	0.129369	0.608506	0.542852	0.914388	5	135081811	135093813	protein_coding	Bud23
839	ENSMUSG00000005397	139.051	-0.101944	0.220859	0.46158	0.644383	0.940068	13	13612136	13686854	protein_coding	Nid1
840	ENSMUSG00000005410	36.6646	0.0413368	0.287303	-0.143879	0.885596	NA	8	75836197	75855067	protein_coding	Mcm5
841	ENSMUSG00000005413	57.2584	-0.0806886	0.240704	0.335219	0.73746	NA	8	75820249	75827217	protein_coding	Hmox1
842	ENSMUSG00000005417	4588.47	-0.00570962	0.0608223	0.0938737	0.925209	0.991485	11	59552131	59671686	protein_coding	Mprip
843	ENSMUSG00000005442	2923.05	-0.0678527	0.0709297	0.956619	0.33876	0.870226	7	24967129	24993584	protein_coding	Cic
844	ENSMUSG00000005447	489.808	0.337019	0.0938334	-3.59167	0.000328564	0.0862794	7	24994474	24997411	protein_coding	Pafah1b3
845	ENSMUSG00000005465	2.44882	0.806639	1.13861	-0.70844	0.478672	NA	8	84756923	84769218	protein_coding	Il27ra
846	ENSMUSG00000005469	4016.57	-0.0167954	0.0692991	0.242361	0.8085	0.977058	8	84699622	84723072	protein_coding	Prkaca
847	ENSMUSG00000005470	15.7466	0.10466	0.410936	-0.254688	0.798964	NA	8	84682136	84696826	protein_coding	Asf1b
848	ENSMUSG00000005474	0	NA	NA	NA	NA	NA	5	136722000	136729948	protein_coding	Myl10
849	ENSMUSG00000005481	181.243	0.0128598	0.137844	-0.0932926	0.925671	0.991784	8	84441806	84453521	protein_coding	Ddx39a
850	ENSMUSG00000005483	807.602	0.126603	0.0883572	-1.43286	0.151899	0.770058	8	84334822	84339282	protein_coding	Dnajb1
851	ENSMUSG00000005493	1.89018	-0.596338	1.17238	0.508656	0.610993	NA	3	153562786	153611775	protein_coding	Msh4
852	ENSMUSG00000005501	498.924	0.0013382	0.122633	-0.0109122	0.991293	0.998534	1	87872841	87936273	protein_coding	Usp40
853	ENSMUSG00000005503	0	NA	NA	NA	NA	NA	6	52290483	52295363	protein_coding	Evx1
854	ENSMUSG00000005505	161.984	0.240276	0.146251	-1.6429	0.100404	0.702322	2	90735084	90741970	protein_coding	Kbtbd4
855	ENSMUSG00000005506	2689.2	-0.0423298	0.0623534	0.678869	0.497221	0.905366	2	90770727	90849842	protein_coding	Celf1
856	ENSMUSG00000005510	758.433	0.142289	0.0887454	-1.60333	0.108861	0.716457	2	90724978	90735171	protein_coding	Ndufs3
857	ENSMUSG00000005514	1773.86	0.0887133	0.0763437	-1.16202	0.245226	0.836703	5	135698887	135764180	protein_coding	Por
858	ENSMUSG00000005533	1289.95	0.0342019	0.083267	-0.41075	0.681256	0.947464	7	67602575	67883416	protein_coding	Igf1r
859	ENSMUSG00000005534	1259.99	-0.00410646	0.0715927	0.0573587	0.954259	0.994336	8	3172061	3329617	protein_coding	Insr
860	ENSMUSG00000005540	9.58061	1.46637	0.552015	-2.65639	0.00789813	NA	8	3731737	3744175	protein_coding	Fcer2a
861	ENSMUSG00000005547	2.0506	0.652	1.08296	-0.602051	0.54714	NA	7	26534730	26542973	protein_coding	Cyp2a5
862	ENSMUSG00000005553	27.9935	0.251076	0.395871	-0.634236	0.525927	NA	7	30411634	30424959	protein_coding	Atp4a
863	ENSMUSG00000005566	1984.75	0.0508352	0.0655177	-0.775901	0.437808	0.888919	7	12733041	12764962	protein_coding	Trim28
864	ENSMUSG00000005575	1320.69	0.0333698	0.0743246	-0.448973	0.653451	0.94127	7	12769047	12772202	protein_coding	Ube2m
865	ENSMUSG00000005580	428.273	-0.183352	0.096214	1.90567	0.0566934	0.612074	16	4105393	4238362	protein_coding	Adcy9
866	ENSMUSG00000005583	517.625	0.0687578	0.109547	-0.627655	0.53023	0.911447	13	83652153	83815199	protein_coding	Mef2c
867	ENSMUSG00000005609	942.221	0.0237196	0.0906361	-0.261702	0.793552	0.972879	7	110628158	110655584	protein_coding	Ctr9
868	ENSMUSG00000005610	8537.72	-0.0350814	0.0579974	0.604879	0.54526	0.914968	7	110666957	110682237	protein_coding	Eif4g2
869	ENSMUSG00000005611	21.6661	-0.714735	0.359826	1.98633	0.0469963	NA	7	110467473	110581668	protein_coding	Irag1
870	ENSMUSG00000005615	637.984	0.0818242	0.0858576	-0.953022	0.340579	0.870226	16	32249739	32293888	protein_coding	Pcyt1a
871	ENSMUSG00000005621	765.33	0.0833881	0.0849743	-0.981333	0.326428	0.864545	7	80643429	80694912	protein_coding	Zfp592
872	ENSMUSG00000005625	1340.56	0.100788	0.0676163	-1.49058	0.136071	0.751036	3	94940005	94949925	protein_coding	Psmd4
873	ENSMUSG00000005628	4.0767	-0.146941	0.788109	0.186448	0.852093	NA	3	95031787	95036520	protein_coding	Tmod4
874	ENSMUSG00000005640	6.09145	0.837804	0.788617	-1.06237	0.288067	NA	3	87704258	87723408	protein_coding	Insrr
875	ENSMUSG00000005649	3.67237	0.501085	0.809029	-0.619366	0.535675	NA	7	13132057	13142812	protein_coding	Cabp5
876	ENSMUSG00000005656	513.762	-0.0162062	0.0903357	0.179399	0.857624	0.984112	12	54793134	54842488	protein_coding	Snx6
877	ENSMUSG00000005667	191.337	0.268536	0.144706	-1.85574	0.0634912	0.633987	6	83282673	83302890	protein_coding	Mthfd2
878	ENSMUSG00000005672	670.337	0.0278153	0.244624	-0.113707	0.90947	0.987501	5	75735576	75817382	protein_coding	Kit
879	ENSMUSG00000005674	165.574	-0.0837789	0.158777	0.527652	0.597741	0.929485	1	171043580	171050083	protein_coding	Tomm40l
880	ENSMUSG00000005677	1.72418	-0.732916	1.25753	0.58282	0.560015	NA	1	171041539	171048270	protein_coding	Nr1i3
881	ENSMUSG00000005681	17.2163	0.209735	0.419348	-0.500146	0.616972	NA	1	171052623	171053948	protein_coding	Apoa2
882	ENSMUSG00000005682	465.742	-0.0582793	0.109924	0.530181	0.595987	0.928837	10	128139204	128157227	protein_coding	Pan2
883	ENSMUSG00000005683	3625.72	0.0589435	0.0676718	-0.871021	0.383743	0.879539	10	128173603	128198348	protein_coding	Cs
884	ENSMUSG00000005686	644.657	0.0640204	0.0837682	-0.764257	0.444714	0.891506	7	110367413	110411612	protein_coding	Ampd3
885	ENSMUSG00000005687	943.176	0.0596617	0.0779869	-0.765022	0.444258	0.891506	3	103078971	103086482	protein_coding	Bcas2
886	ENSMUSG00000005696	1.95794	1.3199	1.18863	-1.11044	0.26681	NA	X	41591330	41618207	protein_coding	Sh2d1a
887	ENSMUSG00000005698	995.327	-0.0378966	0.0693381	0.546548	0.58469	0.927302	8	106363200	106409554	protein_coding	Ctcf
888	ENSMUSG00000005699	184.438	0.149895	0.138969	-1.07862	0.280756	0.851584	8	106427780	106430128	protein_coding	Pard6a
889	ENSMUSG00000005705	27.0544	-1.08719	0.923494	1.17726	0.239093	NA	8	106293330	106364025	protein_coding	Agrp
890	ENSMUSG00000005716	47.5582	-0.196131	0.262156	0.748148	0.454371	NA	15	78075314	78090600	protein_coding	Pvalb
891	ENSMUSG00000005718	105.555	0.11717	0.193184	-0.606519	0.54417	0.914917	16	4362525	4377718	protein_coding	Tfap4
892	ENSMUSG00000005732	350.228	0.130486	0.117434	-1.11114	0.266506	0.8457	16	18057648	18066596	protein_coding	Ranbp1
893	ENSMUSG00000005763	2.1751	-0.512561	1.0699	0.479073	0.631887	NA	1	165616250	165704846	protein_coding	Cd247
894	ENSMUSG00000005774	472.527	0.0609908	0.11157	-0.546662	0.584611	0.927302	3	94861386	94868872	protein_coding	Rfx5
895	ENSMUSG00000005779	1315.48	0.203552	0.0826361	-2.46324	0.0137689	0.399	3	94791404	94794272	protein_coding	Psmb4
896	ENSMUSG00000005800	0.228268	-15.5136	195.481	0.0793613	0.936745	NA	9	7558457	7568486	protein_coding	Mmp8
897	ENSMUSG00000005802	672.397	0.0590817	0.0879466	-0.67179	0.501717	0.90619	2	122523153	122544583	protein_coding	Slc30a4
898	ENSMUSG00000005803	82.7575	0.382471	0.203864	-1.87611	0.0606408	0.625253	2	122607157	122651489	protein_coding	Sqor
899	ENSMUSG00000005804	440.683	0.0479378	0.0942491	-0.508629	0.611013	0.933401	2	122580423	122591395	protein_coding	Bloc1s6
900	ENSMUSG00000005813	710.71	-0.0117812	0.0849469	0.138689	0.889696	0.986392	3	138164717	138195276	protein_coding	Metap1
901	ENSMUSG00000005823	487.641	0.0799404	0.0999365	-0.799912	0.423762	0.886954	17	57541635	57555446	protein_coding	Gpr108
902	ENSMUSG00000005824	0.355157	-1.10493	1.89991	0.58157	0.560856	NA	17	57496492	57501177	protein_coding	Tnfsf14
903	ENSMUSG00000005836	0.622165	1.81681	1.76929	-1.02686	0.304486	NA	18	11052064	11085635	protein_coding	Gata6
904	ENSMUSG00000005846	802.933	0.11338	0.0868107	-1.30606	0.191532	0.798738	16	11010834	11021195	protein_coding	Rsl1d1
905	ENSMUSG00000005864	13.3924	-0.625725	0.580498	1.07791	0.281073	NA	X	71035455	71053824	protein_coding	Cnga2
906	ENSMUSG00000005871	4053.97	-0.16374	0.0727129	2.25186	0.0243308	0.464721	18	34353977	34455605	protein_coding	Apc
907	ENSMUSG00000005873	5534.8	-0.0302792	0.0628329	0.4819	0.629877	0.938178	18	34477938	34507123	protein_coding	Reep5
908	ENSMUSG00000005881	2081.98	0.0628783	0.066866	-0.940363	0.347031	0.870226	2	155849965	155860199	protein_coding	Ergic3
909	ENSMUSG00000005882	1068.43	0.0212402	0.0880531	-0.241221	0.809384	0.977309	2	155688814	155772230	protein_coding	Uqcc1
910	ENSMUSG00000005883	6.61135	0.727885	0.803162	-0.906275	0.36479	NA	2	172819493	172835369	protein_coding	Spo11
911	ENSMUSG00000005886	1809.12	-0.0999954	0.0750587	1.33223	0.182785	0.791435	1	13209329	13444307	protein_coding	Ncoa2
912	ENSMUSG00000005891	0	NA	NA	NA	NA	NA	13	28200195	28207542	protein_coding	Prl4a1
913	ENSMUSG00000005892	3669.22	0.375257	0.278792	-1.34601	0.178299	0.787604	6	92219042	92221631	protein_coding	Trh
914	ENSMUSG00000005893	1049.38	0.00758773	0.071048	-0.106797	0.91495	0.988473	6	92068371	92151275	protein_coding	Nr2c2
915	ENSMUSG00000005897	181.927	0.0395287	0.137702	-0.28706	0.774066	0.970346	10	93983885	94033073	protein_coding	Nr2c1
916	ENSMUSG00000005899	729.191	-0.0936885	0.0765894	1.22326	0.221233	0.81971	16	17437218	17462692	protein_coding	Smpd4
917	ENSMUSG00000005907	463.201	-0.0848513	0.103697	0.818265	0.413206	0.885774	5	3646066	3687232	protein_coding	Pex1
918	ENSMUSG00000005917	4.86916	-0.957374	0.968096	0.988925	0.3227	NA	11	21944764	21952897	protein_coding	Otx1
919	ENSMUSG00000005936	997.224	0.0177322	0.0693172	-0.255813	0.798095	0.974033	17	29170924	29188523	protein_coding	Kctd20
920	ENSMUSG00000005947	5.54586	0.40928	0.708959	-0.577297	0.563739	NA	11	72981409	73038272	protein_coding	Itgae
921	ENSMUSG00000005949	307.25	0.181812	0.128429	-1.41566	0.156874	0.776006	11	73074422	73089868	protein_coding	Ctns
922	ENSMUSG00000005950	18.0607	-0.593311	0.388749	1.52621	0.126959	NA	11	73051247	73063511	protein_coding	P2rx5
923	ENSMUSG00000005951	76.4669	0.423673	0.226661	-1.86919	0.0615966	0.629847	11	73090286	73115337	protein_coding	Shpk
924	ENSMUSG00000005952	1.72168	0.555657	1.21528	-0.457226	0.647509	NA	11	73125118	73152068	protein_coding	Trpv1
925	ENSMUSG00000005958	129.027	-0.163085	0.161339	1.01082	0.312103	0.863714	16	21023505	21042055	protein_coding	Ephb3
926	ENSMUSG00000005968	101.258	0.116963	0.190214	-0.614902	0.53862	0.913201	3	94520064	94566179	protein_coding	Tuft1
927	ENSMUSG00000005973	835.817	0.0360655	0.102911	-0.350453	0.725999	0.960578	2	105216636	105229664	protein_coding	Rcn1
928	ENSMUSG00000005980	166.874	-0.139224	0.142711	0.975561	0.329282	0.866524	16	3854806	3857888	protein_coding	Dnase1
929	ENSMUSG00000005981	925.316	0.133472	0.0707836	-1.88563	0.0593449	0.620378	16	3857835	3895691	protein_coding	Trap1
930	ENSMUSG00000005982	824.206	0.140047	0.0818764	-1.71046	0.08718	0.679056	16	3690239	3722634	protein_coding	Naa60
931	ENSMUSG00000005983	67.5201	0.0373894	0.248129	-0.150686	0.880224	0.984962	16	3713043	3726553	protein_coding	1700037C18Rik
932	ENSMUSG00000005986	973.137	-0.0860005	0.0866409	0.992608	0.320901	0.863892	19	4320208	4333165	protein_coding	Ankrd13d
933	ENSMUSG00000005994	4.71797	0.0600139	0.827066	-0.0725625	0.942154	NA	4	80752360	80769956	protein_coding	Tyrp1
934	ENSMUSG00000006005	2519.72	-0.106496	0.0683363	1.5584	0.119138	0.72469	1	150268589	150325686	protein_coding	Tpr
935	ENSMUSG00000006007	0	NA	NA	NA	NA	NA	1	150195168	150209657	protein_coding	Pdc
936	ENSMUSG00000006010	710.285	0.092077	0.0927511	-0.992732	0.32084	0.863892	1	150237056	150268831	protein_coding	Odr4
937	ENSMUSG00000006014	22.9315	-0.354436	0.417784	0.848373	0.396231	NA	1	150325163	150341916	protein_coding	Prg4
938	ENSMUSG00000006019	176.118	0.0389803	0.161259	-0.241725	0.808993	0.977309	7	15931072	15955962	protein_coding	Dhx34
939	ENSMUSG00000006021	242.954	0.0419152	0.120436	-0.348028	0.727819	0.961338	7	15853820	15861441	protein_coding	Kptn
940	ENSMUSG00000006024	2391.76	0.085886	0.0752485	-1.14136	0.253718	0.840931	7	15832383	15851900	protein_coding	Napa
941	ENSMUSG00000006050	355.975	0.0127133	0.1304	-0.0974941	0.922334	0.991106	18	36799734	36803868	protein_coding	Sra1
942	ENSMUSG00000006056	6.83996	0.921835	0.832795	-1.10692	0.26833	NA	11	95990152	96002790	protein_coding	Calcoco2
943	ENSMUSG00000006057	1063.74	0.0843028	0.0898494	-0.938267	0.348107	0.870226	11	95959678	95966496	protein_coding	Atp5mc1
944	ENSMUSG00000006058	528.449	0.055697	0.0895031	-0.622291	0.53375	0.912331	11	95925711	95938256	protein_coding	Snf8
945	ENSMUSG00000006095	785.11	0.105346	0.1027	-1.02577	0.305001	0.86143	7	29923556	29931697	protein_coding	Tbcb
946	ENSMUSG00000006127	570.398	0.00210661	0.0964592	-0.0218394	0.982576	0.997479	11	75521814	75539697	protein_coding	Inpp5k
947	ENSMUSG00000006134	1284.6	0.0530868	0.0671261	-0.790852	0.429031	0.888141	16	17269851	17305298	protein_coding	Crkl
948	ENSMUSG00000006143	1.35154	-1.47208	1.54931	0.950149	0.342036	NA	5	136083346	136093180	protein_coding	Upk3bl
949	ENSMUSG00000006154	238.057	-0.0566776	0.199499	0.284099	0.776334	0.970346	7	4463673	4483486	protein_coding	Eps8l1
950	ENSMUSG00000006169	832.209	0.0438673	0.078122	-0.561523	0.574441	0.924522	11	45742791	45801452	protein_coding	Clint1
951	ENSMUSG00000006179	0.241023	-0.126047	2.14597	0.0587367	0.953162	NA	13	22186343	22193912	protein_coding	Prss16
952	ENSMUSG00000006191	182.699	0.189102	0.137581	-1.37448	0.169292	0.780037	13	29375729	30039657	protein_coding	Cdkal1
953	ENSMUSG00000006200	0	NA	NA	NA	NA	NA	X	36915787	36918734	protein_coding	Rhox6
954	ENSMUSG00000006204	36.6742	-0.0329175	0.434866	0.0756958	0.939661	NA	7	130776131	130908180	protein_coding	Cdcp3
955	ENSMUSG00000006205	863.791	0.0319999	0.0942202	-0.339629	0.734136	0.962012	7	130537841	130587390	protein_coding	Htra1
956	ENSMUSG00000006215	297.056	-0.0116722	0.118	0.0989165	0.921205	0.990893	4	141171965	141195241	protein_coding	Zbtb17
957	ENSMUSG00000006216	0.456536	-16.4066	193.321	0.0848671	0.932367	NA	4	141131664	141143325	protein_coding	Clcnkb
958	ENSMUSG00000006218	107.474	0.0949648	0.185802	-0.511107	0.609276	0.932579	4	141095531	141111486	protein_coding	Fam131c
959	ENSMUSG00000006219	12.3183	0.113817	0.45402	-0.250687	0.802056	NA	4	141303373	141333407	protein_coding	Fblim1
960	ENSMUSG00000006221	0.126889	15.3212	280.455	-0.05463	0.956433	NA	4	141148090	141152622	protein_coding	Hspb7
961	ENSMUSG00000006235	12.5264	0.111423	0.501643	-0.222117	0.824223	NA	9	21870193	21874802	protein_coding	Epor
962	ENSMUSG00000006241	187.455	0.0585542	0.143531	-0.407956	0.683306	0.947697	9	21838767	21847168	protein_coding	Ccdc159
963	ENSMUSG00000006262	382.379	-0.00609784	0.0981849	0.0621057	0.950479	0.993498	5	88868714	88912079	protein_coding	Mob1b
964	ENSMUSG00000006269	3.34425	0.184029	1.03367	-0.178036	0.858695	NA	6	83719972	83735837	protein_coding	Atp6v1b1
965	ENSMUSG00000006270	218.113	0.0722713	0.170507	-0.42386	0.671668	0.945202	19	59154619	59158488	protein_coding	Vax1
966	ENSMUSG00000006273	8471.54	0.0666628	0.0792047	-0.841652	0.399983	0.882952	8	69541298	69566363	protein_coding	Atp6v1b2
967	ENSMUSG00000006276	1225.88	-0.0799343	0.0796755	1.00325	0.315741	0.863892	8	73094839	73175304	protein_coding	Eps15l1
968	ENSMUSG00000006281	199.742	-0.131941	0.145693	0.905609	0.365143	0.876685	14	51061516	51108017	protein_coding	Tep1
969	ENSMUSG00000006288	515.751	-0.180142	0.0877965	2.05181	0.0401883	0.544462	14	51002872	51022976	protein_coding	Ttc5
970	ENSMUSG00000006289	298.275	-0.0652225	0.11124	0.586323	0.557658	0.918904	14	51143935	51162350	protein_coding	Osgep
971	ENSMUSG00000006299	1821.76	0.136306	0.068384	-1.99325	0.0462342	0.577283	1	74318999	74323897	protein_coding	Aamp
972	ENSMUSG00000006301	594.965	-0.120515	0.135941	0.88653	0.375332	0.87773	1	74327406	74344781	protein_coding	Tmbim1
973	ENSMUSG00000006304	1340.95	0.113194	0.0865784	-1.30741	0.191073	0.798738	1	74275243	74307368	protein_coding	Arpc2
974	ENSMUSG00000006307	1618.42	-0.0127584	0.0970012	0.131528	0.895357	0.987047	7	30268283	30288151	protein_coding	Kmt2b
975	ENSMUSG00000006310	23.6896	0.396251	0.344231	-1.15112	0.249682	NA	7	30289106	30298334	protein_coding	Zbtb32
976	ENSMUSG00000006311	0	NA	NA	NA	NA	NA	7	30333041	30335277	protein_coding	Etv2
977	ENSMUSG00000006313	7.6976	-0.203852	0.679507	0.3	0.764177	NA	7	30302517	30312272	protein_coding	Upk1a
978	ENSMUSG00000006315	694.455	0.108602	0.0869122	-1.24956	0.21146	0.80976	7	30427126	30428965	protein_coding	Tmem147
979	ENSMUSG00000006333	2671.93	0.198213	0.0657908	-3.01277	0.00258874	0.199689	7	3706992	3709896	protein_coding	Rps9
980	ENSMUSG00000006335	239.146	0.15097	0.15564	-0.969998	0.332047	0.867916	7	3623323	3632928	protein_coding	Tfpt
981	ENSMUSG00000006342	584.294	0.0779134	0.104278	-0.747171	0.454961	0.896126	10	75472540	75479842	protein_coding	Susd2
982	ENSMUSG00000006344	21.4208	0.217265	0.413908	-0.52491	0.599645	NA	10	75425174	75453034	protein_coding	Ggt5
983	ENSMUSG00000006345	23.8805	0.222735	0.406116	-0.548452	0.583382	NA	10	75397438	75422034	protein_coding	Ggt1
984	ENSMUSG00000006356	763.12	0.180943	0.0833644	-2.17051	0.0299682	0.501175	12	113103856	113109126	protein_coding	Crip2
985	ENSMUSG00000006360	38.6039	0.397587	0.30564	-1.30084	0.193314	NA	12	113109936	113117499	protein_coding	Crip1
986	ENSMUSG00000006362	78.9257	0.280171	0.215893	-1.29773	0.19438	0.802893	8	123351880	123425848	protein_coding	Cbfa2t3
987	ENSMUSG00000006369	132.722	0.0816279	0.235002	-0.34735	0.728328	0.961702	15	85090150	85170736	protein_coding	Fbln1
988	ENSMUSG00000006373	7451.81	0.0905097	0.068447	-1.32233	0.186058	0.794376	X	35861859	35869732	protein_coding	Pgrmc1
989	ENSMUSG00000006378	13.5218	-0.0559303	0.443136	0.126215	0.899562	NA	15	78915074	78922553	protein_coding	Gcat
990	ENSMUSG00000006386	96.8808	0.0762948	0.209686	-0.363853	0.715967	0.957089	4	94627526	94763213	protein_coding	Tek
991	ENSMUSG00000006389	2.14329	-0.0159409	1.04183	0.0153008	0.987792	NA	4	118299612	118314710	protein_coding	Mpl
992	ENSMUSG00000006390	211.286	-0.159133	0.129878	1.22526	0.220479	0.818611	4	118285290	118290150	protein_coding	Elovl1
993	ENSMUSG00000006392	247.822	0.024665	0.152479	-0.16176	0.871494	0.984427	4	118266534	118272979	protein_coding	Med8
994	ENSMUSG00000006395	203.373	0.00940996	0.133806	-0.0703253	0.943935	0.993074	4	118217187	118219941	protein_coding	Hyi
995	ENSMUSG00000006398	9.40242	-0.310246	0.541412	0.573031	0.566624	NA	4	118290098	118294549	protein_coding	Cdc20
996	ENSMUSG00000006403	344.692	-0.171932	0.336369	0.511142	0.609251	0.932579	1	171077990	171088206	protein_coding	Adamts4
997	ENSMUSG00000006411	34.3709	-0.0767105	0.31273	0.245293	0.80623	NA	1	171197667	171216166	protein_coding	Nectin4
998	ENSMUSG00000006412	1125.84	0.0837956	0.090134	-0.929677	0.352538	0.870734	1	171173238	171186822	protein_coding	Pfdn2
999	ENSMUSG00000006418	800.856	0.140293	0.0744462	-1.88449	0.0594988	0.620481	2	167334565	167358093	protein_coding	Rnf114
1000	ENSMUSG00000006423	569.49	0.0913992	0.0927734	-0.985187	0.324532	0.863892	X	36087390	36137764	protein_coding	Steep1
1001	ENSMUSG00000006435	1272.69	0.0587731	0.0718111	-0.81844	0.413106	0.885774	19	47167259	47247880	protein_coding	Neurl1a
1002	ENSMUSG00000006442	378.166	-0.0404053	0.10405	0.388326	0.697775	0.951959	4	148675960	148679450	protein_coding	Srm
1003	ENSMUSG00000006445	10.6467	-0.637696	0.560817	1.13708	0.255504	NA	4	141028551	141056695	protein_coding	Epha2
1004	ENSMUSG00000006456	381.113	0.0236213	0.105727	-0.223418	0.82321	0.981048	19	4850597	4861662	protein_coding	Rbm14
1005	ENSMUSG00000006457	38.7946	-0.0746963	0.280155	0.266625	0.789758	NA	19	4911244	4927937	protein_coding	Actn3
1006	ENSMUSG00000006462	0.59618	-0.678167	1.50959	0.449239	0.653259	NA	2	167532548	167584184	lncRNA	A530013C23Rik
1007	ENSMUSG00000006463	273.849	0.11852	0.115348	-1.0275	0.304184	0.86143	19	4928696	4935425	protein_coding	Zdhhc24
1008	ENSMUSG00000006464	1021.32	-0.00097853	0.0726575	0.0134677	0.989255	0.997801	19	4936906	4956656	protein_coding	Bbs1
1009	ENSMUSG00000006469	2.0053	-1.83912	1.22027	1.50715	0.131773	NA	2	25118910	25124376	protein_coding	Slc34a3
1010	ENSMUSG00000006471	107.689	-0.343515	0.196023	1.75242	0.0797009	0.672533	2	25134833	25146034	protein_coding	Ndor1
1011	ENSMUSG00000006476	2704.77	0.0739827	0.0775095	-0.954499	0.339831	0.870226	2	24944367	24952893	protein_coding	Nsmf
1012	ENSMUSG00000006488	0	NA	NA	NA	NA	NA	13	27817349	27826476	protein_coding	Prl7a1
1013	ENSMUSG00000006490	0	NA	NA	NA	NA	NA	13	27741978	27748589	protein_coding	Prl8a9
1014	ENSMUSG00000006494	896.378	0.0687378	0.0715518	-0.960672	0.336717	0.870226	2	71703568	71734202	protein_coding	Pdk1
1015	ENSMUSG00000006498	535.517	0.0557376	0.141358	-0.3943	0.69336	0.950933	10	79690261	79700605	protein_coding	Ptbp1
1016	ENSMUSG00000006517	237.275	0.0887679	0.155551	-0.570669	0.568224	0.922134	8	123160340	123170161	protein_coding	Mvd
1017	ENSMUSG00000006519	47.5299	0.183425	0.307442	-0.596619	0.550762	NA	8	123151515	123159669	protein_coding	Cyba
1018	ENSMUSG00000006522	6638.22	0.0419562	0.0703414	-0.596466	0.550864	0.916021	14	30630529	30645717	protein_coding	Itih3
1019	ENSMUSG00000006526	439.911	-0.112098	0.0950128	1.17982	0.238072	0.830896	14	30547547	30599167	protein_coding	Stimate
1020	ENSMUSG00000006527	926.639	0.00323589	0.0729513	-0.0443568	0.96462	0.995238	14	30436806	30544678	protein_coding	Sfmbt1
1021	ENSMUSG00000006529	0	NA	NA	NA	NA	NA	14	30651137	30665246	protein_coding	Itih1
1022	ENSMUSG00000006538	3.92566	1.01139	0.84052	-1.20329	0.228863	NA	1	74984474	74990831	protein_coding	Ihh
1023	ENSMUSG00000006542	2.39066	-1.70985	1.22844	1.39189	0.163956	NA	1	74778081	74788380	protein_coding	Prkag3
1024	ENSMUSG00000006546	0	NA	NA	NA	NA	NA	1	74929093	74932302	protein_coding	Cryba2
1025	ENSMUSG00000006567	171.419	0.0707956	0.152081	-0.465511	0.641565	0.939022	8	22482801	22550321	protein_coding	Atp7b
1026	ENSMUSG00000006570	0	NA	NA	NA	NA	NA	8	22329942	22333498	protein_coding	Defb2
1027	ENSMUSG00000006574	0.850928	-0.536362	1.39064	0.385693	0.699724	NA	11	102239650	102257029	protein_coding	Slc4a1
1028	ENSMUSG00000006575	2718.61	0.0818799	0.0674135	-1.21459	0.224522	0.820603	11	102284229	102293381	protein_coding	Rundc3a
1029	ENSMUSG00000006576	2223.16	-0.0212518	0.0607788	0.349659	0.726595	0.960667	1	75522910	75538816	protein_coding	Slc4a3
1030	ENSMUSG00000006585	32.02	-0.101147	0.30444	0.33224	0.739708	NA	8	123294754	123300293	protein_coding	Cdt1
1031	ENSMUSG00000006586	173.842	-0.133434	0.211813	0.629961	0.52872	0.911142	4	13743436	13893649	protein_coding	Runx1t1
1032	ENSMUSG00000006587	0.126889	15.3212	280.455	-0.05463	0.956433	NA	8	123180947	123187472	protein_coding	Snai3
1033	ENSMUSG00000006589	248.109	0.050861	0.139878	-0.36361	0.716149	0.957089	8	123301374	123303648	protein_coding	Aprt
1034	ENSMUSG00000006599	452.772	0.069446	0.106081	-0.654651	0.512692	0.907205	7	46445527	46473224	protein_coding	Gtf2h1
1035	ENSMUSG00000006611	82.7486	0.0146615	0.220945	-0.0663582	0.947093	0.993457	13	23886017	23894837	protein_coding	Hfe
1036	ENSMUSG00000006638	4.03643	0.271742	0.783156	-0.346983	0.728604	NA	5	31107410	31112435	protein_coding	Abhd1
1037	ENSMUSG00000006641	557.203	-0.0225738	0.0976539	0.231161	0.81719	0.979104	5	31193380	31206268	protein_coding	Slc5a6
1038	ENSMUSG00000006642	2.4665	0.859601	1.06728	-0.805415	0.42058	NA	5	31126006	31134362	protein_coding	Tcf23
1039	ENSMUSG00000006649	4.46312	0.261123	0.950689	-0.274667	0.783572	NA	7	30157740	30186648	protein_coding	Nphs1
1040	ENSMUSG00000006651	14562.3	0.012607	0.0586448	-0.214972	0.829789	0.981664	7	30134407	30144960	protein_coding	Aplp1
1041	ENSMUSG00000006673	1102.96	0.0576212	0.0783273	-0.735646	0.461946	0.899264	9	108394005	108437362	protein_coding	Qrich1
1042	ENSMUSG00000006675	1104.96	0.0913455	0.0817213	-1.11777	0.263666	0.8457	9	108456061	108474866	protein_coding	P4htm
1043	ENSMUSG00000006676	2386.66	-0.0899761	0.0885838	1.01572	0.309764	0.863707	9	108367801	108379536	protein_coding	Usp19
1044	ENSMUSG00000006678	65.5795	0.325797	0.256567	-1.26983	0.204144	NA	X	92348373	92675761	protein_coding	Pola1
1045	ENSMUSG00000006699	3358.04	0.0392324	0.0676302	-0.580102	0.561846	0.92114	4	137047007	137085031	protein_coding	Cdc42
1046	ENSMUSG00000006705	162.301	0.0200808	0.161964	-0.123983	0.901328	0.987055	17	31783708	31826667	protein_coding	Pknox1
1047	ENSMUSG00000006711	895.398	-0.0138789	0.099909	0.138915	0.889517	0.986392	13	25029118	25085253	protein_coding	D130043K22Rik
1048	ENSMUSG00000006715	27.1201	0.1476	0.362932	-0.406688	0.684237	NA	13	24935828	24945906	protein_coding	Gmnn
1049	ENSMUSG00000006717	430.496	0.158565	0.100281	-1.58121	0.113831	0.717998	13	25001931	25015523	protein_coding	Acot13
1050	ENSMUSG00000006720	72.1164	0.0327853	0.219283	-0.149511	0.88115	0.984962	13	22129264	22144949	protein_coding	Zfp184
1051	ENSMUSG00000006724	1.61	-1.24204	1.2488	0.994584	0.319939	NA	10	126884119	126888875	protein_coding	Cyp27b1
1052	ENSMUSG00000006728	632.043	0.12658	0.10127	-1.24993	0.211325	0.80976	10	126899403	126903789	protein_coding	Cdk4
1053	ENSMUSG00000006731	679.227	0.0471773	0.092654	-0.509177	0.610628	0.933182	10	127001094	127008199	protein_coding	B4galnt1
1054	ENSMUSG00000006732	196.313	-0.0243799	0.133715	0.182327	0.855326	0.984112	10	126877283	126882234	protein_coding	Mettl1
1055	ENSMUSG00000006736	387.182	-0.0724648	0.117144	0.618594	0.536184	0.913201	10	126903149	126906133	protein_coding	Tspan31
1056	ENSMUSG00000006740	3754.48	-0.0887708	0.0787698	1.12697	0.259757	0.843452	18	6201002	6242174	protein_coding	Kif5b
1057	ENSMUSG00000006763	175.057	0.130802	0.140264	-0.932536	0.35106	0.870226	7	46335532	46360104	protein_coding	Saal1
1058	ENSMUSG00000006764	12.6274	0.186382	0.561722	-0.331805	0.740037	NA	10	114914546	115020927	protein_coding	Tph2
1059	ENSMUSG00000006777	0.126889	15.3212	280.455	-0.05463	0.956433	NA	11	99368800	99383963	protein_coding	Krt23
1060	ENSMUSG00000006782	4544.61	-0.050521	0.247499	0.204126	0.838255	0.983277	11	100465730	100482555	protein_coding	Cnp
1061	ENSMUSG00000006784	113.26	0.0714047	0.265015	-0.269437	0.787594	0.970917	11	100436433	100463394	protein_coding	Odad4
1062	ENSMUSG00000006800	1384.98	-0.0299815	0.0788692	0.380143	0.70384	0.952394	2	165915009	165997583	protein_coding	Sulf2
1063	ENSMUSG00000006818	2315.13	-0.0668715	0.0707638	0.944996	0.344661	0.870226	17	13225733	13258950	protein_coding	Sod2
1064	ENSMUSG00000006850	151.055	0.325264	0.151312	-2.14963	0.0315846	0.507676	18	36868092	36875450	protein_coding	Tmco6
1065	ENSMUSG00000006906	569.42	0.104382	0.0973258	-1.0725	0.283496	0.85266	6	83520193	83549711	protein_coding	Stambp
1066	ENSMUSG00000006920	1178.36	-0.00169263	0.0790577	0.0214101	0.982919	0.997509	11	101081941	101117289	protein_coding	Ezh1
1067	ENSMUSG00000006930	19175.2	-0.0148808	0.0605328	0.245831	0.805813	0.976871	11	100238153	100246954	protein_coding	Hap1
1068	ENSMUSG00000006931	335.119	-0.131882	0.10597	1.24452	0.213308	0.812045	11	100299282	100305662	protein_coding	P3h4
1069	ENSMUSG00000006932	5712.7	0.0453214	0.0574311	-0.789143	0.430028	0.88836	9	120758282	120789573	protein_coding	Ctnnb1
1070	ENSMUSG00000006941	1078.27	0.13884	0.084249	-1.64797	0.0993586	0.702322	9	120321298	120324396	protein_coding	Eif1b
1071	ENSMUSG00000006948	0	NA	NA	NA	NA	NA	7	43530584	43535228	protein_coding	Klk4
1072	ENSMUSG00000006958	193.933	-0.0157282	0.19004	0.0827622	0.934041	0.992473	16	20551877	20561134	protein_coding	Chrd
1073	ENSMUSG00000006998	2846.07	0.0176232	0.0614426	-0.286824	0.774247	0.970346	16	20470402	20482164	protein_coding	Psmd2
1074	ENSMUSG00000007021	2455.46	-0.0520003	0.0647546	0.803037	0.421953	0.886954	17	24904066	24908929	protein_coding	Syngr3
1075	ENSMUSG00000007029	700.528	0.00387	0.0801688	-0.0482732	0.961499	0.994944	17	35219963	35235298	protein_coding	Vars1
1076	ENSMUSG00000007030	3.83052	0.534234	0.953932	-0.560033	0.575457	NA	17	35235555	35245717	protein_coding	Vwa7
1077	ENSMUSG00000007033	13.263	-0.100342	0.45976	0.218248	0.827236	NA	17	35191679	35198261	protein_coding	Hspa1l
1078	ENSMUSG00000007034	0.744796	2.12123	1.77149	-1.19743	0.231141	NA	17	35133442	35149412	protein_coding	Slc44a4
1079	ENSMUSG00000007035	7.29005	0.0046646	0.632198	-0.00737838	0.994113	NA	17	35247581	35265721	protein_coding	Msh5
1080	ENSMUSG00000007036	1041.89	0.021779	0.0701614	-0.310413	0.756247	0.96777	17	35308239	35321963	protein_coding	Abhd16a
1081	ENSMUSG00000007038	706.856	0.035517	0.0912669	-0.389155	0.697161	0.951959	17	35150229	35154929	protein_coding	Neu1
1082	ENSMUSG00000007039	94.5362	0.13023	0.188146	-0.692174	0.488828	0.903054	17	35278011	35281071	protein_coding	Ddah2
1083	ENSMUSG00000007041	100.019	0.0160556	0.191857	-0.0836853	0.933307	0.992374	17	35268942	35277725	protein_coding	Clic1
1084	ENSMUSG00000007050	83.4018	0.0506204	0.202874	-0.249516	0.802961	0.976365	17	35200838	35204867	protein_coding	Lsm2
1085	ENSMUSG00000007080	32.0968	0.097325	0.332122	-0.29304	0.769491	NA	5	110434172	110485340	protein_coding	Pole
1086	ENSMUSG00000007097	15561.1	0.0276582	0.0686278	-0.403018	0.686935	0.948377	1	172099276	172125631	protein_coding	Atp1a2
1087	ENSMUSG00000007107	1.72542	1.40193	3.87906	-0.36141	0.717793	NA	1	172051080	172085981	protein_coding	Atp1a4
1088	ENSMUSG00000007122	25.7693	-0.577141	0.366651	1.57409	0.115468	NA	1	172037461	172047435	protein_coding	Casq1
1089	ENSMUSG00000007207	669.564	-0.0619865	0.0873158	0.709911	0.477759	0.901527	5	135052336	135079954	protein_coding	Stx1a
1090	ENSMUSG00000007209	4.47877	0.860818	0.829429	-1.03784	0.299343	NA	7	16455854	16460057	protein_coding	Ceacam9
1091	ENSMUSG00000007216	99.655	-0.191647	0.184325	1.03972	0.298468	0.85661	6	48578997	48600161	protein_coding	Zfp775
1092	ENSMUSG00000007279	50.4206	0.177776	0.28666	-0.620161	0.535152	NA	7	109397883	109464886	protein_coding	Scube2
1093	ENSMUSG00000007338	454.381	0.0752621	0.0964897	-0.780001	0.43539	0.888606	19	6103652	6107815	protein_coding	Mrpl49
1094	ENSMUSG00000007379	9.58038	0.109384	0.653385	-0.167412	0.867046	NA	3	103009920	103077085	protein_coding	Dennd2c
1095	ENSMUSG00000007411	891.279	-0.104745	0.0771812	1.35713	0.17474	0.784054	12	111540957	111622655	protein_coding	Mark3
1096	ENSMUSG00000007415	736.861	-0.0132993	0.0761624	0.174618	0.86138	0.984112	5	3682932	3707185	protein_coding	Gatad1
1097	ENSMUSG00000007440	39.3532	-0.00945128	0.327627	0.0288477	0.976986	NA	18	37138256	37320710	protein_coding	Pcdha10
1098	ENSMUSG00000007457	0	NA	NA	NA	NA	NA	5	88117318	88120729	protein_coding	2310003L06Rik
1099	ENSMUSG00000007458	1832.67	0.103999	0.0629096	-1.65315	0.0983012	0.701601	6	122285679	122294639	protein_coding	M6pr
1100	ENSMUSG00000007476	354.113	0.201973	0.131001	-1.54177	0.12313	0.734138	2	30127727	30153802	protein_coding	Lrrc8a
1101	ENSMUSG00000007480	11.0863	-0.498127	0.528642	0.942276	0.346051	NA	18	68470575	68475517	protein_coding	Mc5r
1102	ENSMUSG00000007564	7134.93	0.0989229	0.0700307	-1.41257	0.157784	0.776013	17	21165573	21186178	protein_coding	Ppp2r1a
1103	ENSMUSG00000007570	233.77	0.187934	0.130303	-1.44229	0.149221	0.768436	17	28532493	28545546	protein_coding	Fance
1104	ENSMUSG00000007589	145.62	0.0350405	0.162122	-0.216137	0.828881	0.981196	14	55912146	55919277	protein_coding	Tinf2
1105	ENSMUSG00000007591	6.50864	-0.570528	0.707304	0.806623	0.419884	NA	14	55887641	55889996	protein_coding	Tssk4
1106	ENSMUSG00000007594	1307.49	0.0030425	0.0979685	-0.0310559	0.975225	0.99624	8	70536107	70543512	protein_coding	Hapln4
1107	ENSMUSG00000007603	1098.35	-0.0889901	0.0882847	1.00799	0.31346	0.863714	17	57071757	57077093	protein_coding	Dus3l
1108	ENSMUSG00000007610	310.341	0.133311	0.117337	-1.13614	0.255899	0.841841	8	71940747	71952227	protein_coding	Gtpbp3
1109	ENSMUSG00000007613	383.177	-0.168068	0.137136	1.22556	0.220365	0.818611	4	47353222	47414931	protein_coding	Tgfbr1
1110	ENSMUSG00000007617	391.584	-0.156657	0.120325	1.30195	0.192935	0.800758	13	93436143	93541637	protein_coding	Homer1
1111	ENSMUSG00000007646	81.971	-0.30725	0.233156	1.31779	0.187574	0.794837	11	87267471	87295780	protein_coding	Rad51c
1112	ENSMUSG00000007653	1318.79	-0.0466243	0.0766169	0.608539	0.54283	0.914388	11	42310584	42519855	protein_coding	Gabrb2
1113	ENSMUSG00000007655	107.358	-0.125959	0.196975	0.639468	0.522519	0.908825	6	17306334	17341451	protein_coding	Cav1
1114	ENSMUSG00000007656	977.591	0.019136	0.076523	-0.250069	0.802534	0.976089	9	74944896	74967595	protein_coding	Arpp19
1115	ENSMUSG00000007659	1478.17	0.106139	0.0831207	-1.27693	0.201627	0.805358	2	152622588	152673648	protein_coding	Bcl2l1
1116	ENSMUSG00000007670	1508.36	-0.0718396	0.0658233	1.0914	0.275096	0.848372	17	57328051	57338522	protein_coding	Khsrp
1117	ENSMUSG00000007682	57.3587	-0.17205	0.271537	0.633616	0.526331	NA	12	90691326	90705812	protein_coding	Dio2
1118	ENSMUSG00000007721	573.858	0.181094	0.103669	-1.74685	0.0806638	0.672533	8	71320871	71326579	protein_coding	Ccdc124
1119	ENSMUSG00000007739	1509.87	0.0467279	0.0738774	-0.632506	0.527057	0.91046	11	22940519	22953780	protein_coding	Cct4
1120	ENSMUSG00000007777	196.472	0.308544	0.133752	-2.30684	0.0210637	0.446531	11	51576213	51579701	protein_coding	Trappc2b
1121	ENSMUSG00000007783	1280.46	-0.013998	0.0801943	0.174551	0.861432	0.984112	7	44608796	44624275	protein_coding	Cpt1c
1122	ENSMUSG00000007805	4.25978	0.880799	0.878796	-1.00228	0.316209	NA	1	91729183	91775750	protein_coding	Twist2
1123	ENSMUSG00000007812	700.41	0.130771	0.115077	-1.13638	0.255796	0.841841	5	145168525	145213723	protein_coding	Zfp655
1124	ENSMUSG00000007815	1514.81	0.0926663	0.0657877	-1.40856	0.158964	0.776013	9	108183328	108215133	protein_coding	Rhoa
1125	ENSMUSG00000007817	2871.02	-0.0189328	0.0686858	0.275644	0.782822	0.97046	14	25459609	25667167	protein_coding	Zmiz1
1126	ENSMUSG00000007827	645.601	-0.0850583	0.0955688	0.890022	0.373454	0.877628	6	118478269	118539187	protein_coding	Ankrd26
1127	ENSMUSG00000007833	81.0779	0.0566107	0.205221	-0.275852	0.782662	0.97046	7	44790108	44804008	protein_coding	Aldh16a1
1128	ENSMUSG00000007836	1098.2	0.10261	0.0896536	-1.14451	0.252411	0.840931	13	58273693	58276370	protein_coding	Hnrnpa0
1129	ENSMUSG00000007837	41.0225	0.0873084	0.274997	-0.317488	0.750873	NA	7	44703008	44712101	protein_coding	Prrg2
1130	ENSMUSG00000007850	3984.04	-0.0222878	0.0605668	0.367988	0.712882	0.955149	11	50267817	50277355	protein_coding	Hnrnph1
1131	ENSMUSG00000007867	129.196	-0.0698919	0.16164	0.432393	0.665456	0.944576	12	86129315	86209233	protein_coding	Ift43
1132	ENSMUSG00000007872	171.421	0.551505	0.219054	-2.51767	0.0118133	0.385713	4	135870808	135873066	protein_coding	Id3
1133	ENSMUSG00000007877	2.47277	0.109419	1.05513	-0.103702	0.917406	NA	11	98274637	98275779	protein_coding	Tcap
1134	ENSMUSG00000007880	2975.42	-0.0644713	0.070077	0.920006	0.35757	0.874003	4	133406319	133484080	protein_coding	Arid1a
1135	ENSMUSG00000007888	8.33978	0.0777819	0.763239	-0.10191	0.918828	NA	8	70945808	70956731	protein_coding	Crlf1
1136	ENSMUSG00000007891	2337.56	0.0532613	0.0633735	-0.840435	0.400665	0.882952	7	141929648	141941775	protein_coding	Ctsd
1137	ENSMUSG00000007892	3717.14	0.214927	0.0811397	-2.64885	0.00807657	0.3345	9	61820566	61821824	protein_coding	Rplp1
1138	ENSMUSG00000007907	0	NA	NA	NA	NA	NA	5	88127298	88129403	protein_coding	Cabs1
1139	ENSMUSG00000007908	326.861	0.0773035	0.113116	-0.683398	0.494356	0.904829	9	75922137	76043632	protein_coding	Hmgcll1
1140	ENSMUSG00000007944	237.263	0.0116282	0.125982	-0.0923005	0.926459	0.992135	7	27353340	27356771	protein_coding	Ttc9b
1141	ENSMUSG00000007946	0.99638	-2.60943	4.04401	0.645258	0.51876	NA	7	101467520	101471933	protein_coding	Phox2a
1142	ENSMUSG00000007950	1950.63	0.0287122	0.0731641	-0.392435	0.694737	0.951553	8	71909349	71916299	protein_coding	Abhd8
1143	ENSMUSG00000007987	884.507	0.121093	0.0801328	-1.51116	0.130749	0.746393	5	136937004	136944258	protein_coding	Ift22
1144	ENSMUSG00000007989	2062.94	-0.265512	0.0911577	2.91267	0.00358355	0.232054	14	65429898	65499912	protein_coding	Fzd3
1145	ENSMUSG00000008028	23.6547	0.47344	0.347439	-1.36266	0.172991	NA	7	44009467	44035244	protein_coding	1700008O03Rik
1146	ENSMUSG00000008035	1468.02	0.0910754	0.0806524	-1.12923	0.258799	0.842725	X	10581252	10585929	protein_coding	Mid1ip1
1147	ENSMUSG00000008036	1121.13	0.0885431	0.0862728	-1.02631	0.304743	0.86143	7	16472335	16483219	protein_coding	Ap2s1
1148	ENSMUSG00000008090	188.938	-0.256137	0.135489	1.89046	0.0586963	0.618295	5	108840248	108854790	protein_coding	Fgfrl1
1149	ENSMUSG00000008129	55.8204	0.444806	0.247903	-1.79427	0.0727697	NA	8	84874654	84899219	protein_coding	Brme1
1150	ENSMUSG00000008136	53.9694	0.479341	0.29254	-1.63855	0.101307	NA	1	43162234	43236144	protein_coding	Fhl2
1151	ENSMUSG00000008140	1914	0.120054	0.0625046	-1.92072	0.0547667	0.60693	7	44139361	44145953	protein_coding	Emc10
1152	ENSMUSG00000008153	9444.28	-0.0170053	0.0654017	0.260013	0.794854	0.97333	6	124407540	124441753	protein_coding	Clstn3
1153	ENSMUSG00000008167	238.428	0.249754	0.147858	-1.68914	0.0911928	0.684195	8	85786684	85793753	protein_coding	Fbxw9
1154	ENSMUSG00000008193	0.350899	-1.10976	1.90141	0.583652	0.559454	NA	7	44175417	44181495	protein_coding	Spib
1155	ENSMUSG00000008200	1066.67	0.0298351	0.0780269	-0.38237	0.702187	0.95204	2	90575714	90611365	protein_coding	Fnbp4
1156	ENSMUSG00000008206	1922.35	-0.094563	0.0743606	1.27168	0.203486	0.805995	8	4543026	4581680	protein_coding	Cers4
1157	ENSMUSG00000008226	328.006	0.0431073	0.136778	-0.315162	0.752638	0.967107	2	73142945	73168162	protein_coding	Scrn3
1158	ENSMUSG00000008301	575.741	0.139956	0.0907639	-1.54198	0.123079	0.734138	18	56695515	56720784	protein_coding	Phax
1159	ENSMUSG00000008305	451.179	0.0268715	0.0921612	-0.29157	0.770615	0.970346	4	72036042	72119130	protein_coding	Tle1
1160	ENSMUSG00000008307	90.0777	-0.0662497	0.231819	0.285782	0.775045	0.970346	5	3621566	3634356	protein_coding	1700109H08Rik
1161	ENSMUSG00000008318	615.523	0.176826	0.141128	-1.25295	0.210223	0.80976	7	100495054	100512653	protein_coding	Relt
1162	ENSMUSG00000008333	294.103	0.0659607	0.121736	-0.541833	0.587934	0.927302	2	142904959	142914773	protein_coding	Snrpb2
1163	ENSMUSG00000008348	2601.13	0.0855635	0.0601986	-1.42135	0.155214	0.772547	5	125463029	125467266	protein_coding	Ubc
1164	ENSMUSG00000008373	486.97	0.105483	0.0925214	-1.14009	0.254248	0.841245	7	3632984	3645485	protein_coding	Prpf31
1165	ENSMUSG00000008384	34.5403	0.0319972	0.296508	-0.107914	0.914064	NA	7	27186335	27189741	protein_coding	Sertad1
1166	ENSMUSG00000008393	782.863	0.0151509	0.0995193	-0.152241	0.878997	0.984881	16	8476444	8490019	protein_coding	Carhsp1
1167	ENSMUSG00000008398	98.9326	0.0107191	0.190346	-0.0563139	0.955092	0.99452	10	93083276	93146997	protein_coding	Elk3
1168	ENSMUSG00000008429	476.435	0.0622963	0.0944999	-0.659221	0.509754	0.907196	9	25019428	25063116	protein_coding	Herpud2
1169	ENSMUSG00000008435	375.465	0.137986	0.104207	-1.32415	0.185453	0.794192	7	4427769	4448648	protein_coding	Rdh13
1170	ENSMUSG00000008438	18.0824	-0.730052	0.388418	1.87955	0.060169	NA	12	81605358	81615248	protein_coding	Adam21
1171	ENSMUSG00000008450	321.063	0.0265337	0.137282	-0.193278	0.846741	0.984112	8	106587212	106605962	protein_coding	Nutf2
1172	ENSMUSG00000008461	1.64887	-0.958259	1.32692	0.722169	0.47019	NA	7	45266713	45270483	protein_coding	Fut1
1173	ENSMUSG00000008475	759.611	-0.0734927	0.0782215	0.939546	0.347451	0.870226	1	152642293	152651348	protein_coding	Arpc5
1174	ENSMUSG00000008482	0.562129	-15.659	195.124	0.0802517	0.936037	NA	17	24934813	24937037	protein_coding	Rnf151
1175	ENSMUSG00000008489	1338.35	0.110653	0.0879558	-1.25806	0.208371	0.808866	4	91139000	91289022	protein_coding	Elavl2
1176	ENSMUSG00000008496	694.843	-0.0328841	0.116023	0.283428	0.776849	0.970346	7	24786769	24879151	protein_coding	Pou2f2
1177	ENSMUSG00000008540	210.258	0.160656	0.130255	-1.23339	0.217429	0.816566	6	138117314	138133753	protein_coding	Mgst1
1178	ENSMUSG00000008575	703.79	-0.0731985	0.10585	0.691527	0.489234	0.903054	4	82208410	82623987	protein_coding	Nfib
1179	ENSMUSG00000008590	1.78656	-3.60756	1.68009	2.14725	0.0317735	NA	9	48846308	48876290	protein_coding	Htr3b
1180	ENSMUSG00000008601	3.45813	0.501932	0.86461	-0.58053	0.561557	NA	3	88449336	88455607	protein_coding	Rab25
1181	ENSMUSG00000008604	1282.08	-0.0452611	0.0671086	0.674445	0.500028	0.906097	3	88461065	88477032	protein_coding	Ubqln4
1182	ENSMUSG00000008658	1247.78	0.000674237	0.0994114	-0.00678229	0.994589	0.999367	16	5124665	7229391	protein_coding	Rbfox1
1183	ENSMUSG00000008668	1580.38	0.229623	0.0770909	-2.97859	0.00289573	0.209047	17	34170973	34174975	protein_coding	Rps18
1184	ENSMUSG00000008682	3423.6	0.221817	0.074292	-2.98575	0.00282883	0.207818	X	73314418	73316741	protein_coding	Rpl10
1185	ENSMUSG00000008683	2933.57	0.150106	0.0675681	-2.22155	0.026314	0.480844	7	117703595	117715411	protein_coding	Rps15a
1186	ENSMUSG00000008690	1197.17	0.0447333	0.0692843	-0.645647	0.518508	0.908825	15	89239922	89257029	protein_coding	Ncaph2
1187	ENSMUSG00000008730	2548.81	0.0105621	0.0782431	-0.134991	0.892619	0.986392	3	103647131	103698879	protein_coding	Hipk1
1188	ENSMUSG00000008734	2922.68	0.0704779	0.0869231	-0.810808	0.417476	0.886392	7	118571270	118594434	protein_coding	Gprc5b
1189	ENSMUSG00000008763	1396.64	-0.103737	0.0712015	1.45695	0.145131	0.763661	3	100469524	100592819	protein_coding	Man1a2
1190	ENSMUSG00000008789	0	NA	NA	NA	NA	NA	7	17447163	17495057	protein_coding	Ceacam5
1191	ENSMUSG00000008813	0.342402	-15.792	194.81	0.0810637	0.935391	NA	14	52155882	52158157	protein_coding	Tppp2
1192	ENSMUSG00000008822	105.182	0.119055	0.186182	-0.639457	0.522525	0.908825	12	85319172	85335212	protein_coding	Acyp1
1193	ENSMUSG00000008843	0.228268	-15.5136	195.481	0.0793613	0.936745	NA	5	134943103	134944380	protein_coding	Cldn13
1194	ENSMUSG00000008845	19.3818	0.339555	0.400172	-0.848524	0.396146	NA	6	124281615	124307486	protein_coding	Cd163
1195	ENSMUSG00000008855	2277.58	0.0045183	0.060911	-0.0741787	0.940868	0.992473	11	102085258	102120992	protein_coding	Hdac5
1196	ENSMUSG00000008859	778.584	-0.0850806	0.0981302	0.867017	0.385933	0.879539	13	18055156	18118824	protein_coding	Rala
1197	ENSMUSG00000008874	0	NA	NA	NA	NA	NA	8	115144826	115152586	protein_coding	Clec3a
1198	ENSMUSG00000008892	1370.53	0.131575	0.0853256	-1.54203	0.123066	0.734138	8	23067102	23083774	protein_coding	Vdac3
1199	ENSMUSG00000008932	13.2471	0.118047	0.447123	-0.264014	0.791769	NA	4	107825529	107870729	protein_coding	Slc1a7
1200	ENSMUSG00000008958	408.357	0.0873738	0.101266	-0.862811	0.388242	0.880169	3	95018333	95030362	protein_coding	Vps72
1201	ENSMUSG00000008976	354.475	-0.0486733	0.127746	0.381015	0.703192	0.95204	16	84631813	84660667	protein_coding	Gabpa
1202	ENSMUSG00000008999	133.339	0.254363	0.160016	-1.5896	0.111924	0.716796	2	172709805	172782114	protein_coding	Bmp7
1203	ENSMUSG00000009013	1503.36	0.191065	0.0724163	-2.63843	0.00832914	0.339268	5	115435169	115439058	protein_coding	Dynll1
1204	ENSMUSG00000009030	243.299	0.00740043	0.15461	-0.0478652	0.961824	0.994944	2	37240086	37249344	protein_coding	Pdcl
1205	ENSMUSG00000009035	1115.58	0.02378	0.067798	-0.350748	0.725778	0.960389	15	79244884	79287769	protein_coding	Tmem184b
1206	ENSMUSG00000009047	0	NA	NA	NA	NA	NA	16	88574784	88575616	protein_coding	Krtap13-23
1207	ENSMUSG00000009070	30.4878	0.111955	0.310312	-0.360782	0.718263	NA	10	74793309	74868418	protein_coding	Rsph14
1208	ENSMUSG00000009073	1306.88	0.0071028	0.0753819	-0.0942242	0.924931	0.991485	11	4715845	4799536	protein_coding	Nf2
1209	ENSMUSG00000009075	447.311	0.162023	0.157964	-1.0257	0.305035	0.86143	11	4686892	4696778	protein_coding	Cabp7
1210	ENSMUSG00000009076	85.9146	0.142803	0.199776	-0.714817	0.474722	0.901527	11	4654678	4687669	protein_coding	Zmat5
1211	ENSMUSG00000009079	3390.59	0.066999	0.0653	-1.02602	0.304883	0.86143	11	5019689	5049266	protein_coding	Ewsr1
1212	ENSMUSG00000009090	3103.59	0.0435966	0.0632356	-0.68943	0.490552	0.903085	11	4936824	4992791	protein_coding	Ap1b1
1213	ENSMUSG00000009092	18.2392	0.145965	0.394257	-0.370228	0.711213	NA	10	75729247	75731775	protein_coding	Derl3
1214	ENSMUSG00000009093	0.929546	0.243535	1.5763	-0.154498	0.877217	NA	10	75650777	75658377	protein_coding	Gstt4
1215	ENSMUSG00000009097	9.99943	0.290251	0.658625	-0.440693	0.659436	NA	16	18399729	18409421	protein_coding	Tbx1
1216	ENSMUSG00000009108	5.12343	0.512174	0.753886	-0.679378	0.496898	NA	3	108000105	108008748	protein_coding	Gnat2
1217	ENSMUSG00000009112	708.043	-0.0922001	0.0774662	1.1902	0.233968	0.826076	6	120813173	120869803	protein_coding	Bcl2l13
1218	ENSMUSG00000009114	6.49016	1.47314	1.01545	-1.45073	0.146856	NA	10	76284915	76296944	protein_coding	2610028H24Rik
1219	ENSMUSG00000009115	1.03329	17.9287	262.545	-0.0682882	0.945556	NA	10	76398106	76406035	protein_coding	Spatc1l
1220	ENSMUSG00000009145	12.3061	0.338948	0.587115	-0.577311	0.56373	NA	6	83034825	83044299	protein_coding	Dqx1
1221	ENSMUSG00000009185	0.337454	-0.0848679	2.13123	0.039821	0.968236	NA	11	82006011	82007625	protein_coding	Ccl8
1222	ENSMUSG00000009207	661.746	-0.246644	0.088604	2.78367	0.00537484	0.281239	2	74350635	74409779	protein_coding	Lnpk
1223	ENSMUSG00000009210	46.3016	0.090427	0.427686	-0.211433	0.832549	NA	11	106256298	106268384	protein_coding	Prr29
1224	ENSMUSG00000009214	5.38038	1.08179	0.828393	-1.30589	0.191591	NA	2	26951648	26962191	protein_coding	Mymk
1225	ENSMUSG00000009216	604.957	0.0953476	0.134442	-0.70921	0.478194	0.901527	2	27000392	27032503	protein_coding	Fam163b
1226	ENSMUSG00000009246	7.88508	-0.544979	0.579683	0.940132	0.34715	NA	7	142622890	142648379	protein_coding	Trpm5
1227	ENSMUSG00000009248	4.95013	-0.116601	0.758047	0.153817	0.877754	NA	7	142520566	142523001	protein_coding	Ascl2
1228	ENSMUSG00000009281	277.514	0.410916	0.450025	-0.913096	0.361192	0.875665	6	48546630	48549723	protein_coding	Rarres2
1229	ENSMUSG00000009291	851.002	0.00864165	0.0729401	-0.118476	0.905691	0.987251	10	77417554	77434566	protein_coding	Pttg1ip
1230	ENSMUSG00000009292	626.956	-0.0742211	0.0844852	0.87851	0.379667	0.879147	10	77743556	77806397	protein_coding	Trpm2
1231	ENSMUSG00000009293	374.702	0.0297165	0.110491	-0.268949	0.787969	0.971048	10	77458109	77481827	protein_coding	Ube2g2
1232	ENSMUSG00000009350	7.175	-0.763584	0.659957	1.15702	0.247264	NA	11	87684407	87695239	protein_coding	Mpo
1233	ENSMUSG00000009356	49.101	-0.284071	0.299473	0.948569	0.34284	NA	11	87697254	87719115	protein_coding	Lpo
1234	ENSMUSG00000009376	68.2678	-0.0834263	0.272253	0.306429	0.759278	0.968433	6	17463799	17573979	protein_coding	Met
1235	ENSMUSG00000009378	34.2177	-0.145125	0.313005	0.46365	0.642899	NA	19	34645803	34724689	protein_coding	Slc16a12
1236	ENSMUSG00000009394	6522.04	-0.0126199	0.0671107	0.188047	0.85084	0.984112	6	115111863	115258967	protein_coding	Syn2
1237	ENSMUSG00000009406	789.014	-0.0791887	0.0896157	0.883648	0.376886	0.878386	X	20799634	20816847	protein_coding	Elk1
1238	ENSMUSG00000009418	3511.56	-0.121313	0.0780037	1.55522	0.119895	0.727165	1	135362318	135615843	protein_coding	Nav1
1239	ENSMUSG00000009470	1703.35	-0.0646312	0.0721225	0.896132	0.370183	0.876928	13	98975527	99062892	protein_coding	Tnpo1
1240	ENSMUSG00000009471	0.916791	-0.849794	1.55913	0.545043	0.585724	NA	7	46025898	46028523	protein_coding	Myod1
1241	ENSMUSG00000009487	4.95407	2.75707	1.10667	-2.49133	0.0127267	NA	7	45890411	45960858	protein_coding	Otog
1242	ENSMUSG00000009535	1247.34	-0.0187499	0.0752753	0.249084	0.803296	0.976486	18	68433426	68457923	protein_coding	Rnmt
1243	ENSMUSG00000009545	13.5264	-0.663448	0.51566	1.2866	0.198234	NA	7	142660099	142980779	protein_coding	Kcnq1
1244	ENSMUSG00000009549	924.3	0.0499032	0.0743646	-0.67106	0.502182	0.906263	2	118306331	118310192	protein_coding	Srp14
1245	ENSMUSG00000009551	37.7635	0.226179	0.318772	-0.709533	0.477994	NA	2	32622629	32632457	lncRNA	6330409D20Rik
1246	ENSMUSG00000009555	875.793	-0.0186514	0.0958754	0.194537	0.845755	0.984112	2	32595796	32603088	protein_coding	Cdk9
1247	ENSMUSG00000009563	266.576	0.125058	0.13487	-0.927244	0.3538	0.871577	2	32647246	32652256	protein_coding	Tor2a
1248	ENSMUSG00000009566	112.204	0.220336	0.186957	-1.17854	0.238582	0.830896	2	32572621	32594157	protein_coding	Fpgs
1249	ENSMUSG00000009569	2613.94	-0.043387	0.0805617	0.538557	0.590193	0.927782	16	13074345	13235393	protein_coding	Mrtfb
1250	ENSMUSG00000009575	4770.64	-0.072293	0.0627784	1.15156	0.249502	0.839422	15	103099971	103148243	protein_coding	Cbx5
1251	ENSMUSG00000009580	0	NA	NA	NA	NA	NA	5	88032888	88042033	protein_coding	Odam
1252	ENSMUSG00000009585	49.9975	0.248917	0.255975	-0.972429	0.330837	NA	15	79775860	79800107	protein_coding	Apobec3
1253	ENSMUSG00000009588	0.114134	-14.5802	197.814	0.0737068	0.941244	NA	11	116655851	116666333	protein_coding	St6galnac1
1254	ENSMUSG00000009596	7.54946	-0.121012	0.670423	0.180501	0.856759	NA	X	133360867	133377239	protein_coding	Taf7l
1255	ENSMUSG00000009614	211.6	-0.120591	0.142414	0.846762	0.397128	0.882952	2	27078405	27138349	protein_coding	Sardh
1256	ENSMUSG00000009621	209.836	-0.226371	0.141379	1.60117	0.10934	0.716457	2	27152116	27317045	protein_coding	Vav2
1257	ENSMUSG00000009628	47.6493	-0.865431	0.307673	2.81283	0.00491081	NA	8	34006766	34075610	protein_coding	Tex15
1258	ENSMUSG00000009630	1207.61	-0.0364166	0.0735909	0.494852	0.620704	0.936864	8	34089653	34109469	protein_coding	Ppp2cb
1259	ENSMUSG00000009633	46.219	0.177693	0.261051	-0.680683	0.496072	NA	1	192954469	192955525	protein_coding	G0s2
1260	ENSMUSG00000009640	341.129	0.210317	0.12135	-1.73313	0.0830717	0.673561	4	117531878	117539470	protein_coding	Dmap1
1261	ENSMUSG00000009646	0	NA	NA	NA	NA	NA	10	59239482	59257798	protein_coding	Pla2g12b
1262	ENSMUSG00000009647	309.493	-0.0871416	0.109577	0.795257	0.426464	0.887111	10	59282806	59452514	protein_coding	Mcu
1263	ENSMUSG00000009654	0.37215	16.7471	270.228	-0.0619739	0.950584	NA	10	59258780	59277600	protein_coding	Oit3
1264	ENSMUSG00000009670	1.80979	0.329317	1.22754	-0.268273	0.788489	NA	X	99882254	100103273	protein_coding	Tex11
1265	ENSMUSG00000009681	2498.95	0.000877345	0.0591506	-0.0148324	0.988166	0.997725	10	74896424	75020753	protein_coding	Bcr
1266	ENSMUSG00000009687	62.9863	-0.187841	0.243191	0.772401	0.439877	NA	7	30732147	30741906	protein_coding	Fxyd5
1267	ENSMUSG00000009731	211.317	-0.218977	0.155511	1.40811	0.159099	0.776013	X	7688528	7704519	protein_coding	Kcnd1
1268	ENSMUSG00000009733	575.926	-0.0237495	0.0847183	0.280335	0.77922	0.970457	15	100395893	100449889	protein_coding	Tfcp2
1269	ENSMUSG00000009734	99.3726	-0.12862	0.231179	0.556366	0.577961	0.924875	13	18295683	18797700	protein_coding	Pou6f2
1270	ENSMUSG00000009739	1259.64	0.00740864	0.0683403	-0.108408	0.913672	0.988223	15	100473199	100497865	protein_coding	Pou6f1
1271	ENSMUSG00000009741	1367.09	0.00495791	0.0832771	-0.0595351	0.952526	0.994189	9	113760002	113806270	protein_coding	Ubp1
1272	ENSMUSG00000009772	52.8678	-0.294664	0.253545	1.16218	0.245164	NA	1	132243864	132261226	protein_coding	Nuak2
1273	ENSMUSG00000009828	357.733	-0.0491473	0.131109	0.374857	0.707767	0.95311	9	78016474	78079389	protein_coding	Cilk1
1274	ENSMUSG00000009863	1371	0.200581	0.0837752	-2.39428	0.0166531	0.423654	4	140688514	140706504	protein_coding	Sdhb
1275	ENSMUSG00000009876	7.21387	-0.560107	0.6204	0.902817	0.366623	NA	2	152596093	152606957	protein_coding	Cox4i2
1276	ENSMUSG00000009894	5482.2	0.116016	0.0908941	-1.27638	0.20182	0.805358	11	59297960	59342012	protein_coding	Snap47
1277	ENSMUSG00000009900	0	NA	NA	NA	NA	NA	11	59138859	59181578	protein_coding	Wnt3a
1278	ENSMUSG00000009905	608.306	-0.0928872	0.0829018	1.12045	0.262523	0.845526	1	106648189	106687457	protein_coding	Kdsr
1279	ENSMUSG00000009907	847.528	0.00427178	0.0730534	-0.0584747	0.953371	0.994212	1	106691801	106724458	protein_coding	Vps4b
1280	ENSMUSG00000009927	2036.78	0.287489	0.0843865	-3.40682	0.000657257	0.101681	9	44318436	44321724	protein_coding	Rps25
1281	ENSMUSG00000009941	2.89766	0.417538	1.01124	-0.412896	0.679683	NA	X	133845275	133865503	protein_coding	Nxf2
1282	ENSMUSG00000009995	899.123	0.0707507	0.0970541	-0.728982	0.466012	0.901076	X	73325518	73333757	protein_coding	Tafazzin
1283	ENSMUSG00000010021	182.209	0.144006	0.183935	-0.782915	0.433677	0.888606	11	114656214	114681565	protein_coding	Kif19a
1284	ENSMUSG00000010025	850.053	0.00256217	0.0757882	-0.0338069	0.973031	0.995795	11	61114243	61158290	protein_coding	Aldh3a2
1285	ENSMUSG00000010044	108.833	0.340968	0.283048	-1.20463	0.228346	0.823289	9	107424497	107428518	protein_coding	Zmynd10
1286	ENSMUSG00000010045	433.482	-0.12009	0.11215	1.0708	0.284258	0.853283	9	107411144	107415872	protein_coding	Tmem115
1287	ENSMUSG00000010047	183.173	0.123161	0.176058	-0.69955	0.484208	0.902598	9	107445144	107449978	protein_coding	Hyal2
1288	ENSMUSG00000010048	82.0906	0.0816647	0.204126	-0.400071	0.689104	0.949166	9	107464841	107470584	protein_coding	Ifrd2
1289	ENSMUSG00000010051	43.3816	0.168105	0.30183	-0.556952	0.57756	NA	9	107454126	107458909	protein_coding	Hyal1
1290	ENSMUSG00000010054	760.752	-0.0192659	0.0943094	0.204284	0.838132	0.983277	9	107440454	107443311	protein_coding	Tusc2
1291	ENSMUSG00000010057	461.139	-0.000450862	0.111604	0.00403982	0.996777	0.99953	9	107419425	107422905	protein_coding	Nprl2
1292	ENSMUSG00000010064	1271.37	0.0656296	0.120454	-0.54485	0.585856	0.927302	9	107527833	107546729	protein_coding	Slc38a3
1293	ENSMUSG00000010066	3337.56	-0.0859147	0.0614065	1.39911	0.161779	0.776368	9	107276811	107406542	protein_coding	Cacna2d2
1294	ENSMUSG00000010067	91.261	0.119507	0.253964	-0.470566	0.63795	0.938178	9	107428754	107439466	protein_coding	Rassf1
1295	ENSMUSG00000010080	56.2622	-0.068898	0.243201	0.283296	0.77695	NA	11	94380425	94390800	protein_coding	Epn3
1296	ENSMUSG00000010086	2178.78	-0.041216	0.0685161	0.601553	0.547472	0.915155	11	61339268	61344957	protein_coding	Rnf112
1297	ENSMUSG00000010095	1269.24	0.0773347	0.0715133	-1.0814	0.279518	0.851223	19	8684246	8700733	protein_coding	Slc3a2
1298	ENSMUSG00000010097	1697.58	0.0280112	0.074999	-0.373487	0.708786	0.953282	19	8734437	8748286	protein_coding	Nxf1
1299	ENSMUSG00000010110	893.609	-0.0244242	0.0819253	0.298127	0.765606	0.96987	19	8718777	8733433	protein_coding	Stx5a
1300	ENSMUSG00000010122	17.6254	0.348768	1.17898	-0.295823	0.767365	NA	11	61234227	61269171	protein_coding	Slc47a1
1301	ENSMUSG00000010136	40.822	0.717658	0.376976	-1.90372	0.0569461	NA	3	105904273	105921962	protein_coding	Cimap3
1302	ENSMUSG00000010142	16.3989	0.676792	0.408159	-1.65816	0.0972854	NA	11	61017581	61040198	protein_coding	Tnfrsf13b
1303	ENSMUSG00000010154	417.314	0.0109661	0.113848	-0.0963226	0.923264	0.991434	8	124059452	124096254	protein_coding	Spire2
1304	ENSMUSG00000010175	367.461	-0.0685341	0.11678	0.586864	0.557295	0.918696	1	189850232	189902911	protein_coding	Prox1
1305	ENSMUSG00000010205	0.245262	16.219	273.886	-0.0592183	0.952778	NA	9	20985454	21003304	protein_coding	Raver1
1306	ENSMUSG00000010277	4832.87	-0.00792177	0.0582414	0.136016	0.891809	0.986392	11	78152578	78181449	protein_coding	Bltp2
1307	ENSMUSG00000010290	712.751	0.00655191	0.0842725	-0.0777466	0.93803	0.992473	1	43137870	43155107	protein_coding	AI597479
1308	ENSMUSG00000010307	119.013	0.208758	0.181081	-1.15284	0.248977	0.839422	7	46700349	46704525	protein_coding	Tmem86a
1309	ENSMUSG00000010311	49.7734	0.0459435	0.264559	-0.173661	0.862132	NA	1	133824937	133835737	protein_coding	Optc
1310	ENSMUSG00000010342	10.2682	-0.681479	0.59855	1.13855	0.254891	NA	11	87295891	87446649	protein_coding	Tex14
1311	ENSMUSG00000010358	30.1426	-0.228868	0.458663	0.498989	0.617787	NA	11	101339233	101349524	protein_coding	Ifi35
1312	ENSMUSG00000010362	65.603	0.479287	0.22941	-2.08922	0.0366878	NA	11	101518021	101526926	protein_coding	Rdm1
1313	ENSMUSG00000010376	805.407	0.0813883	0.0954666	-0.852531	0.393919	0.88219	14	55899720	55909581	protein_coding	Nedd8
1314	ENSMUSG00000010392	1037.81	0.0311078	0.0749397	-0.415104	0.678066	0.946644	11	76617428	76654405	protein_coding	Gosr1
1315	ENSMUSG00000010406	182.544	0.395162	0.163756	-2.41311	0.0158169	0.414463	14	54664366	54667213	protein_coding	Mrpl52
1316	ENSMUSG00000010435	0	NA	NA	NA	NA	NA	8	12623029	12650744	protein_coding	Spaca7
1317	ENSMUSG00000010453	2131.51	0.0121322	0.0608128	-0.199501	0.84187	0.98365	1	36374811	36408262	protein_coding	Kansl3
1318	ENSMUSG00000010461	35.1721	0.0867524	0.291953	-0.297145	0.766356	NA	10	22978862	23226684	protein_coding	Eya4
1319	ENSMUSG00000010476	48.1293	0.481488	0.325885	-1.47748	0.139547	NA	7	136795402	136916174	protein_coding	Ebf3
1320	ENSMUSG00000010492	76.2574	0.388334	0.332862	-1.16665	0.243351	0.835217	2	181220273	181226963	lncRNA	Uckl1os
1321	ENSMUSG00000010505	547	0.045729	0.119887	-0.381435	0.702881	0.95204	2	181405125	181469590	protein_coding	Myt1
1322	ENSMUSG00000010517	778.928	-0.0300044	0.0842082	0.356312	0.721607	0.959189	4	109533785	109821157	protein_coding	Faf1
1323	ENSMUSG00000010529	23.3277	-0.430924	0.347218	1.24108	0.214578	NA	12	111451043	111452257	protein_coding	Gm266
1324	ENSMUSG00000010538	6.83684	-0.554974	0.66912	0.829409	0.406873	NA	3	88190064	88204306	protein_coding	Tsacc
1325	ENSMUSG00000010554	940.609	-0.122477	0.0731432	1.67448	0.0940354	0.690674	11	74661656	74719351	protein_coding	Mettl16
1326	ENSMUSG00000010592	12.767	-0.657925	0.49166	1.33817	0.18084	NA	17	50586423	50600664	protein_coding	Dazl
1327	ENSMUSG00000010601	1.65311	-0.494485	1.26295	0.391532	0.695404	NA	15	77272419	77283310	protein_coding	Apol7a
1328	ENSMUSG00000010607	201.282	0.131824	0.132673	-0.993605	0.320415	0.863892	9	22068142	22069654	protein_coding	Pigyl
1329	ENSMUSG00000010608	2228.65	-0.0656902	0.063371	1.0366	0.299924	0.857898	12	83678010	83729897	protein_coding	Rbm25
1330	ENSMUSG00000010609	320.61	0.173917	0.119682	-1.45316	0.14618	0.765062	1	180054569	180091003	protein_coding	Psen2
1331	ENSMUSG00000010651	12.6369	0.374929	0.45955	-0.815862	0.414579	NA	9	118977091	118986161	protein_coding	Acaa1b
1332	ENSMUSG00000010660	176.281	0.156088	0.164538	-0.948643	0.342802	0.870226	9	118900595	118922570	protein_coding	Plcd1
1333	ENSMUSG00000010663	4196	0.0620559	0.0713728	-0.869461	0.384595	0.879539	19	10160252	10174241	protein_coding	Fads1
1334	ENSMUSG00000010721	531.517	-0.144057	0.105285	1.36826	0.171232	0.780662	5	29434800	29583388	protein_coding	Lmbr1
1335	ENSMUSG00000010751	38.3788	0.172097	0.281382	-0.611614	0.540793	NA	7	143188543	143203398	protein_coding	Tnfrsf22
1336	ENSMUSG00000010755	673.699	-0.0250651	0.0804316	0.311632	0.75532	0.96777	7	143110967	143153827	protein_coding	Cars1
1337	ENSMUSG00000010760	0.494801	1.4413	1.8145	-0.794324	0.427007	NA	7	143055282	143056887	protein_coding	Phlda2
1338	ENSMUSG00000010796	0	NA	NA	NA	NA	NA	6	18050963	18109060	protein_coding	Asz1
1339	ENSMUSG00000010797	2.81646	-1.01191	0.946505	1.0691	0.285024	NA	6	17988939	18030584	protein_coding	Wnt2
1340	ENSMUSG00000010803	3656.77	0.0600054	0.0835859	-0.717888	0.472826	0.901508	11	42021766	42073757	protein_coding	Gabra1
1341	ENSMUSG00000010825	28.5503	-0.0817414	0.350121	0.233466	0.815399	NA	5	143343093	143377907	protein_coding	Grid2ip
1342	ENSMUSG00000010830	12.8303	-0.552562	0.459103	1.20357	0.228757	NA	15	79400612	79411940	protein_coding	Kdelr3
1343	ENSMUSG00000010841	0.854691	0.284132	1.39165	-0.204169	0.838221	NA	11	101875105	101883090	protein_coding	Cfap97d1
1344	ENSMUSG00000010911	131.467	-0.0207485	0.172113	0.120552	0.904046	0.987055	2	102904020	102922989	protein_coding	Apip
1345	ENSMUSG00000010914	481.503	0.13841	0.113547	-1.21896	0.222858	0.820544	2	102851420	102903858	protein_coding	Pdhx
1346	ENSMUSG00000010936	554.594	0.167399	0.0904503	-1.85073	0.0642087	0.635482	8	111345217	111447030	protein_coding	Vac14
1347	ENSMUSG00000011008	4.02607	-0.233845	0.860184	0.271855	0.785734	NA	3	145855588	145901268	protein_coding	Mcoln2
1348	ENSMUSG00000011034	0	NA	NA	NA	NA	NA	5	33261563	33320214	protein_coding	Slc5a1
1349	ENSMUSG00000011096	336.109	0.0335746	0.119971	-0.279855	0.779589	0.970457	7	44498415	44504845	protein_coding	Akt1s1
1350	ENSMUSG00000011114	398.972	0.0610363	0.108391	-0.563113	0.573358	0.924522	9	37560059	37568608	protein_coding	Tbrg1
1351	ENSMUSG00000011118	0.380667	16.6358	270.995	-0.0613879	0.95105	NA	9	37571198	37580531	protein_coding	Panx3
1352	ENSMUSG00000011148	361.316	0.0736144	0.10132	-0.72655	0.467502	0.901076	12	112586479	112607794	protein_coding	Adss1
1353	ENSMUSG00000011154	109.584	0.324192	0.267023	-1.2141	0.224711	0.820603	7	83423309	83444088	protein_coding	Cfap161
1354	ENSMUSG00000011158	522.832	0.129133	0.0932223	-1.38521	0.165987	0.779023	12	112923705	112964324	protein_coding	Brf1
1355	ENSMUSG00000011171	565.208	0.34309	0.400809	-0.855993	0.392001	0.88157	12	116041346	116109881	protein_coding	Vipr2
1356	ENSMUSG00000011179	1322.34	0.169934	0.0754768	-2.25148	0.0243554	0.464721	12	17594795	17601506	protein_coding	Odc1
1357	ENSMUSG00000011254	97.5558	-0.0656537	0.187801	0.349592	0.726645	0.960667	11	45837670	45846321	protein_coding	Thg1l
1358	ENSMUSG00000011256	199.957	-0.125596	0.156927	0.800349	0.423509	0.886954	11	45946819	46038170	protein_coding	Adam19
1359	ENSMUSG00000011257	450.591	-0.125613	0.092118	1.36361	0.17269	0.782572	4	123156144	123192718	protein_coding	Pabpc4
1360	ENSMUSG00000011263	2.27439	0.785209	1.03587	-0.758018	0.44844	NA	7	19197256	19230687	protein_coding	Exoc3l2
1361	ENSMUSG00000011267	5.40101	-1.99723	0.843517	2.36774	0.0178971	NA	7	19311212	19314581	protein_coding	Zfp296
1362	ENSMUSG00000011305	47.1315	0.628613	0.384212	-1.63611	0.101817	NA	17	56418601	56424596	protein_coding	Plin5
1363	ENSMUSG00000011306	885.291	0.0610381	0.0779287	-0.783256	0.433477	0.888606	8	70495463	70524997	protein_coding	Sugp1
1364	ENSMUSG00000011349	0.482046	-0.113715	1.61061	0.0706035	0.943713	NA	7	24569482	24577076	protein_coding	Dmrtc2
1365	ENSMUSG00000011350	0	NA	NA	NA	NA	NA	7	24518220	24539700	protein_coding	Gm5893
1366	ENSMUSG00000011382	236.359	-0.108407	0.130989	0.827603	0.407895	0.883461	7	45120411	45138229	protein_coding	Dhdh
1367	ENSMUSG00000011427	277.56	0.12067	0.11481	-1.05104	0.293241	0.854981	7	29515539	29530430	protein_coding	Zfp790
1368	ENSMUSG00000011463	0.236765	-0.130428	2.14679	0.0607549	0.951554	NA	3	20302428	20329897	protein_coding	Cpb1
1369	ENSMUSG00000011486	1.58886	3.23566	1.96567	-1.64609	0.0997461	NA	17	57339773	57348654	protein_coding	Slc25a41
1370	ENSMUSG00000011589	608.618	0.0112005	0.0830539	-0.134859	0.892724	0.986392	17	56293509	56303881	protein_coding	Fsd1
1371	ENSMUSG00000011632	0	NA	NA	NA	NA	NA	7	24241083	24245543	protein_coding	Pinlyp
1372	ENSMUSG00000011658	223.349	-0.0560514	0.143424	0.39081	0.695938	0.9516	7	44545503	44552055	protein_coding	Fuz
1373	ENSMUSG00000011751	1803.69	-0.138264	0.0791226	1.74747	0.0805559	0.672533	7	27055808	27147111	protein_coding	Sptbn4
1374	ENSMUSG00000011752	2234.01	-0.0496821	0.0726117	0.684216	0.493839	0.904829	19	41900362	41907099	protein_coding	Pgam1
1375	ENSMUSG00000011831	1162.34	-0.0936368	0.0742489	1.26112	0.207266	0.808866	5	107892661	108022973	protein_coding	Evi5
1376	ENSMUSG00000011832	1651.88	0.0620282	0.0649276	-0.955345	0.339403	0.870226	8	4216567	4261257	protein_coding	Evi5l
1377	ENSMUSG00000011837	335.659	0.027304	0.10584	-0.257975	0.796426	0.973839	8	4303080	4306220	protein_coding	Snapc2
1378	ENSMUSG00000011877	2655.78	-0.0465828	0.0673301	0.691858	0.489027	0.903054	11	77384388	77398612	protein_coding	Git1
1379	ENSMUSG00000011884	505.968	0.0486364	0.271814	-0.178933	0.857991	0.984112	5	114807459	114829045	protein_coding	Gltp
1380	ENSMUSG00000011958	382.624	0.0890427	0.106388	-0.836959	0.402615	0.88333	9	69896748	69915599	protein_coding	Bnip2
1381	ENSMUSG00000011960	779.814	0.104341	0.0886526	-1.17696	0.23921	0.830896	15	98436570	98468804	protein_coding	Ccnt1
1382	ENSMUSG00000012017	81.2685	0.057927	0.245477	-0.235977	0.813451	0.978533	16	17615146	17626157	protein_coding	Scarf2
1383	ENSMUSG00000012042	0.775792	-0.531243	1.52822	0.347622	0.728124	NA	3	137869839	137945424	protein_coding	4930579F01Rik
1384	ENSMUSG00000012076	787.459	-0.0271589	0.0745601	0.364255	0.715667	0.956859	12	55883109	55916521	protein_coding	Brms1l
1385	ENSMUSG00000012114	762.919	-0.0935739	0.0755174	1.2391	0.215307	0.814507	16	17469072	17550755	protein_coding	Med15
1386	ENSMUSG00000012117	1068.32	0.0777263	0.0697015	-1.11513	0.264794	0.8457	4	133696339	133728229	protein_coding	Dhdds
1387	ENSMUSG00000012123	9.43944	0.094732	0.534609	-0.177198	0.859353	NA	4	133788126	133819815	protein_coding	Crybg2
1388	ENSMUSG00000012126	338.183	0.187953	0.196264	-0.957654	0.338237	0.870226	4	133829881	133854904	protein_coding	Ubxn11
1389	ENSMUSG00000012187	19.2979	0.712071	0.38278	-1.86026	0.0628485	NA	1	78487628	78514810	protein_coding	Mogat1
1390	ENSMUSG00000012211	2.24654	-1.70488	3.84273	0.443665	0.657285	NA	12	113038122	113052537	protein_coding	Tex22
1391	ENSMUSG00000012282	0	NA	NA	NA	NA	NA	18	34675366	34681326	protein_coding	Wnt8a
1392	ENSMUSG00000012296	244.645	-0.333429	0.153575	2.17112	0.0299224	0.501089	17	46568777	46593952	protein_coding	Tjap1
1393	ENSMUSG00000012350	1.13043	0.754522	1.40387	-0.53746	0.59095	NA	2	103093778	103133623	protein_coding	Ehf
1394	ENSMUSG00000012396	11.0885	0.151707	0.598371	-0.253533	0.799857	NA	6	122684448	122691592	protein_coding	Nanog
1395	ENSMUSG00000012405	1825.24	0.0642852	0.0746847	-0.860754	0.389374	0.880478	14	4198305	4201873	protein_coding	Rpl15
1396	ENSMUSG00000012422	510.45	-0.0725822	0.100375	0.723111	0.469612	0.901076	13	90237242	90292026	protein_coding	Tmem167
1397	ENSMUSG00000012428	3.64979	-1.19374	0.872476	1.36823	0.171241	NA	5	8010457	8032213	protein_coding	Steap4
1398	ENSMUSG00000012429	121.583	-0.0969125	0.16594	0.584023	0.559205	0.91967	13	17869777	17874333	protein_coding	Mplkip
1399	ENSMUSG00000012443	52.0283	0.0854816	0.258314	-0.330921	0.740704	NA	19	37364851	37410307	protein_coding	Kif11
1400	ENSMUSG00000012483	56.5743	0.303052	0.243728	-1.2434	0.213719	NA	6	8255936	8259173	protein_coding	Rpa3
1401	ENSMUSG00000012519	1.52483	1.3541	1.45537	-0.930418	0.352155	NA	8	112038429	112064809	protein_coding	Mlkl
1402	ENSMUSG00000012520	0	NA	NA	NA	NA	NA	5	67251742	67256644	protein_coding	Phox2b
1403	ENSMUSG00000012535	1140.46	0.106021	0.0679472	-1.56034	0.118679	0.723949	6	29540826	29609886	protein_coding	Tnpo3
1404	ENSMUSG00000012609	681.065	-0.00129963	0.0835376	0.0155574	0.987587	0.997707	12	85871433	86108667	protein_coding	Ttll5
1405	ENSMUSG00000012640	559.292	-0.148221	0.0853996	1.73562	0.0826312	0.673561	7	42945621	42962718	protein_coding	Zfp715
1406	ENSMUSG00000012705	2.77773	0.644102	0.989962	-0.650633	0.515283	NA	8	3705770	3710110	protein_coding	Retn
1407	ENSMUSG00000012777	5.19601	-0.340034	0.702938	0.483733	0.628575	NA	7	43901572	43906802	protein_coding	Acp4
1408	ENSMUSG00000012819	154.418	-0.627414	0.525578	1.19376	0.232571	0.826076	10	60138527	60532269	protein_coding	Cdh23
1409	ENSMUSG00000012848	2201.97	0.252483	0.0810873	-3.11371	0.00184749	0.17274	7	12656217	12660613	protein_coding	Rps5
1410	ENSMUSG00000012889	6.26634	0.500227	0.675785	-0.740215	0.459169	NA	8	84852618	84859156	protein_coding	Podnl1
1411	ENSMUSG00000013033	4675.14	-0.053434	0.0568539	0.939847	0.347296	0.870226	8	84626734	84668583	protein_coding	Adgrl1
1412	ENSMUSG00000013076	2032.08	-0.027002	0.0821586	0.328657	0.742415	0.964413	9	14453262	14556352	protein_coding	Amotl1
1413	ENSMUSG00000013083	0	NA	NA	NA	NA	NA	7	30398351	30399961	protein_coding	2200002J24Rik
1414	ENSMUSG00000013089	515.457	-0.0120973	0.0995575	0.12151	0.903287	0.987055	16	22200059	22258469	protein_coding	Etv5
1415	ENSMUSG00000013091	5.32754	0.00161504	1.92209	-0.000840251	0.99933	NA	7	4785936	4787340	protein_coding	Tmem190
1416	ENSMUSG00000013150	365.299	-0.0336386	0.105214	0.319717	0.749183	0.966289	8	106440486	106485296	protein_coding	Gfod2
1417	ENSMUSG00000013155	121.691	-0.15739	0.175381	0.897418	0.369496	0.876685	8	106430283	106434842	protein_coding	Enkd1
1418	ENSMUSG00000013158	5.49814	-0.152674	0.839399	0.181884	0.855673	NA	8	106434287	106436878	protein_coding	4933405L10Rik
1419	ENSMUSG00000013160	2297.93	0.0511546	0.0740385	-0.690919	0.489617	0.903054	8	106251097	106292679	protein_coding	Atp6v0d1
1420	ENSMUSG00000013236	6603.88	-0.0319644	0.0625348	0.511145	0.609249	0.932579	17	56719426	56783483	protein_coding	Ptprs
1421	ENSMUSG00000013275	1067.25	0.00794232	0.0751269	-0.105719	0.915806	0.988711	1	131755231	131776603	protein_coding	Slc41a1
1422	ENSMUSG00000013338	0.21007	15.3644	280.128	-0.0548479	0.95626	NA	2	155861059	155894867	protein_coding	Fer1l4
1423	ENSMUSG00000013353	0	NA	NA	NA	NA	NA	7	43141468	43155364	protein_coding	Siglecl2
1424	ENSMUSG00000013367	623.142	-0.013473	0.0891641	0.151104	0.879894	0.984962	7	43122328	43139499	protein_coding	Iglon5
1425	ENSMUSG00000013415	0.434745	-14.7503	197.383	0.0747296	0.94043	NA	11	95847989	95896766	protein_coding	Igf2bp1
1426	ENSMUSG00000013418	2.1303	0.56543	1.20113	-0.470747	0.637821	NA	11	95756769	95805717	protein_coding	B4galnt2
1427	ENSMUSG00000013419	878.996	0.133752	0.0917152	-1.45834	0.144746	0.763118	9	121588396	121600808	protein_coding	Zbtb47
1428	ENSMUSG00000013465	862.327	0.151739	0.0796694	-1.90461	0.0568312	0.612585	2	25089724	25101501	protein_coding	Nelfb
1429	ENSMUSG00000013483	7.34472	-0.435952	0.585196	0.744968	0.456291	NA	11	119198594	119236201	protein_coding	Card14
1430	ENSMUSG00000013495	506.96	0.189427	0.0886872	-2.1359	0.0326874	0.510393	5	108777636	108796648	protein_coding	Tmem175
1431	ENSMUSG00000013523	1625.28	-0.164414	0.3131	0.525116	0.599503	0.930398	2	170188911	170269765	protein_coding	Bcas1
1432	ENSMUSG00000013539	917.522	0.10676	0.0885207	-1.20604	0.227801	0.822321	16	18118689	18165967	protein_coding	Tango2
1433	ENSMUSG00000013562	1.22095	18.0947	261.516	-0.0691917	0.944837	NA	17	31776100	31778087	lncRNA	4833413E03Rik
1434	ENSMUSG00000013584	44.1634	0.487949	0.341178	-1.43019	0.152663	NA	9	71123071	71203525	protein_coding	Aldh1a2
1435	ENSMUSG00000013593	2415.83	0.119997	0.0692471	-1.73289	0.0831155	0.673561	1	171062422	171078957	protein_coding	Ndufs2
1436	ENSMUSG00000013611	12.78	0.113888	0.499297	-0.228097	0.819571	NA	15	36504208	36555718	protein_coding	Snx31
1437	ENSMUSG00000013622	783.584	0.147887	0.0747489	-1.97845	0.0478775	0.581599	5	31205656	31211967	protein_coding	Atraid
1438	ENSMUSG00000013629	516.432	-0.0545496	0.100018	0.545399	0.585479	0.927302	5	31212124	31235823	protein_coding	Cad
1439	ENSMUSG00000013643	0	NA	NA	NA	NA	NA	11	58269869	58281554	protein_coding	Lypd8
1440	ENSMUSG00000013646	649.427	0.0267049	0.0805242	-0.331639	0.740162	0.963515	11	58221550	58238554	protein_coding	Sh3bp5l
1441	ENSMUSG00000013653	0	NA	NA	NA	NA	NA	11	58311937	58316850	protein_coding	1810065E05Rik
1442	ENSMUSG00000013662	1653.11	0.0225594	0.0877516	-0.257082	0.797115	0.974033	19	32649038	32717186	protein_coding	Atad1
1443	ENSMUSG00000013663	1618.66	-0.173485	0.0781813	2.219	0.0264865	0.481437	19	32734897	32803560	protein_coding	Pten
1444	ENSMUSG00000013668	0	NA	NA	NA	NA	NA	7	130739442	130748043	protein_coding	4933402N03Rik
1445	ENSMUSG00000013698	9903.11	0.0704719	0.0750817	-0.938603	0.347935	0.870226	1	172024295	172034371	protein_coding	Pea15a
1446	ENSMUSG00000013701	319.631	0.00301668	0.114804	-0.0262768	0.979037	0.996496	14	31902119	31923855	protein_coding	Timm23
1447	ENSMUSG00000013707	17.2194	-0.285938	0.394512	0.72479	0.468581	NA	3	95046832	95049671	protein_coding	Tnfaip8l2
1448	ENSMUSG00000013736	569.951	0.0936645	0.125896	-0.743982	0.456887	0.897485	6	106746081	106759435	protein_coding	Trnt1
1449	ENSMUSG00000013766	0.798938	-16.8776	192.225	0.0878013	0.930035	NA	17	35295878	35297780	protein_coding	Ly6g6e
1450	ENSMUSG00000013787	2831.43	-0.0274217	0.066252	0.4139	0.678947	0.9467	17	35117445	35133028	protein_coding	Ehmt2
1451	ENSMUSG00000013822	522.8	0.20862	0.0876994	-2.37881	0.0173689	0.429592	9	22024285	22028468	protein_coding	Elof1
1452	ENSMUSG00000013833	578.71	0.112618	0.0920939	-1.22286	0.221384	0.819779	10	79730542	79744757	protein_coding	Med16
1453	ENSMUSG00000013846	364.331	-0.29515	0.102712	2.87356	0.00405873	0.243826	15	66974724	67048679	protein_coding	St3gal1
1454	ENSMUSG00000013858	986.616	0.00163747	0.0695311	-0.0235502	0.981211	0.996881	10	79810782	79820164	protein_coding	Tmem259
1455	ENSMUSG00000013878	483.729	0.0173773	0.104683	-0.165998	0.868158	0.984232	8	26609396	26641818	protein_coding	Rnf170
1456	ENSMUSG00000013921	7175.07	-0.0364429	0.0674021	0.540679	0.588729	0.927374	7	29991153	30007792	protein_coding	Clip3
1457	ENSMUSG00000013928	3.18749	0.461762	0.988968	-0.466913	0.640562	NA	7	29980458	29989309	transcribed_unitary_pseudogene	1700020L13Rik
1458	ENSMUSG00000013936	3.74829	0.228207	0.824307	-0.276846	0.781898	NA	5	122239014	122251535	protein_coding	Myl2
1459	ENSMUSG00000013973	83.7668	-0.0737724	0.203405	0.362687	0.716839	0.957455	1	171156713	171169899	protein_coding	Dedd
1460	ENSMUSG00000013974	3.33514	0.298706	0.890519	-0.335429	0.737301	NA	8	3715754	3719259	protein_coding	Mcemp1
1461	ENSMUSG00000013997	502.703	-0.173069	0.0933951	1.85308	0.0638709	0.635482	1	171165576	171173214	protein_coding	Nit1
1462	ENSMUSG00000014030	1.29419	-0.999175	1.39011	0.718773	0.472281	NA	4	44524757	44710487	protein_coding	Pax5
1463	ENSMUSG00000014039	335.443	0.112837	0.115639	-0.975773	0.329177	0.866524	16	97592667	97653050	protein_coding	Prdm15
1464	ENSMUSG00000014074	635.746	-0.0443987	0.0833078	0.532948	0.59407	0.928102	16	32096277	32120252	protein_coding	Rnf168
1465	ENSMUSG00000014075	136.068	0.0182899	0.158241	-0.115583	0.907983	0.987251	16	32238520	32247917	protein_coding	Dynlt2b
1466	ENSMUSG00000014077	2318.19	0.00254715	0.0658101	-0.0387045	0.969126	0.995767	2	119378178	119417508	protein_coding	Chp1
1467	ENSMUSG00000014104	0	NA	NA	NA	NA	NA	6	41829923	41841347	protein_coding	Sval2
1468	ENSMUSG00000014158	19.1174	0.00292462	0.396292	-0.00737997	0.994112	NA	5	114760213	114796482	protein_coding	Trpv4
1469	ENSMUSG00000014164	465.333	-0.0431962	0.0972101	0.444359	0.656783	0.942039	13	58148042	58261406	protein_coding	Klhl3
1470	ENSMUSG00000014177	314.385	0.0943166	0.108836	-0.866596	0.386164	0.879539	11	62770281	62807606	protein_coding	Tvp23b
1471	ENSMUSG00000014195	2103.93	0.133967	0.0811438	-1.65098	0.0987427	0.701601	11	100473644	100511014	protein_coding	Dnajc7
1472	ENSMUSG00000014198	6.28482	0.348504	0.636925	-0.547166	0.584265	NA	11	100518369	100583281	protein_coding	Zfp385c
1473	ENSMUSG00000014226	1177.64	0.111487	0.0805835	-1.38349	0.166514	0.779679	1	160029937	160040445	protein_coding	Cacybp
1474	ENSMUSG00000014232	228.834	-0.0494503	0.135365	0.36531	0.71488	0.956428	16	3726665	3759011	protein_coding	Cluap1
1475	ENSMUSG00000014243	75.8727	0.0644081	0.214056	-0.300894	0.763496	0.969471	11	62158050	62172201	protein_coding	Zswim7
1476	ENSMUSG00000014245	130.454	0.114468	0.162762	-0.703288	0.481877	0.902046	11	62349286	62405243	protein_coding	Pigl
1477	ENSMUSG00000014294	562.48	0.249705	0.116222	-2.14851	0.0316732	0.507676	18	36875385	36877610	protein_coding	Ndufa2
1478	ENSMUSG00000014301	243.786	0.0642982	0.144343	-0.445453	0.655993	0.942039	16	4434328	4442852	protein_coding	Pam16
1479	ENSMUSG00000014303	257.749	-0.148026	0.117808	1.25651	0.208932	0.808866	16	4412577	4442788	protein_coding	Glis2
1480	ENSMUSG00000014313	1436.03	0.112847	0.096856	-1.1651	0.243978	0.835632	15	35926032	35938392	protein_coding	Cox6c
1481	ENSMUSG00000014329	132.355	0.329775	0.227805	-1.44762	0.147724	0.767344	10	70758662	70995530	protein_coding	Bicc1
1482	ENSMUSG00000014349	1386.46	0.064181	0.0733491	-0.875007	0.38157	0.879317	11	95938258	95956214	protein_coding	Ube2z
1483	ENSMUSG00000014351	0	NA	NA	NA	NA	NA	11	95915371	95921657	protein_coding	Gip
1484	ENSMUSG00000014353	803.598	0.0164241	0.0811939	-0.202283	0.839696	0.98342	2	128660038	128696181	protein_coding	Tmem87b
1485	ENSMUSG00000014355	2109.59	-0.0813792	0.072728	1.11895	0.26316	0.845591	2	128452024	128529311	protein_coding	Anapc1
1486	ENSMUSG00000014361	315.007	-0.00396799	0.126319	0.0314125	0.974941	0.99624	2	128540876	128644814	protein_coding	Mertk
1487	ENSMUSG00000014402	1053.04	0.0973824	0.0702028	-1.38716	0.165393	0.779023	7	46538697	46569717	protein_coding	Tsg101
1488	ENSMUSG00000014418	325.272	-0.0193875	0.114772	0.168922	0.865858	0.984112	7	46409890	46445488	protein_coding	Hps5
1489	ENSMUSG00000014426	1382.61	0.0142033	0.0666384	-0.21314	0.831218	0.9819	17	12446508	12537683	protein_coding	Map3k4
1490	ENSMUSG00000014444	45.569	0.16029	0.270371	-0.592851	0.553281	NA	8	123208437	123278068	protein_coding	Piezo1
1491	ENSMUSG00000014453	0.126889	15.3212	280.455	-0.05463	0.956433	NA	14	63610285	63654486	protein_coding	Blk
1492	ENSMUSG00000014470	371.665	-0.026184	0.128063	0.204463	0.837992	0.983277	8	123192886	123202803	protein_coding	Rnf166
1493	ENSMUSG00000014496	896.314	-0.0634146	0.0811221	0.781718	0.43438	0.888606	14	31420725	31552608	protein_coding	Ankrd28
1494	ENSMUSG00000014498	1499.86	-0.140596	0.088228	1.59356	0.111035	0.716464	10	128212984	128244573	protein_coding	Ankrd52
1495	ENSMUSG00000014503	308.514	-0.126803	0.123568	1.02618	0.304806	0.86143	18	34541542	34577169	protein_coding	Pkd2l2
1496	ENSMUSG00000014504	378.583	-0.0398245	0.106508	0.37391	0.708471	0.953282	18	34463900	34469652	protein_coding	Srp19
1497	ENSMUSG00000014529	0	NA	NA	NA	NA	NA	5	3701181	3730325	protein_coding	Tmbim7
1498	ENSMUSG00000014542	0.547523	0.971126	1.89149	-0.513419	0.607658	NA	6	83621524	83633169	protein_coding	Clec4f
1499	ENSMUSG00000014543	0.122631	15.3187	280.474	-0.0546173	0.956443	NA	6	129808117	129853635	protein_coding	Klra17
1500	ENSMUSG00000014547	681.84	-0.0786387	0.0870205	0.903681	0.366165	0.876685	14	63075127	63198958	protein_coding	Wdfy2
1501	ENSMUSG00000014550	1122.63	0.0764998	0.0680427	-1.12429	0.260889	0.844639	6	92163693	92191906	protein_coding	Rbsn
1502	ENSMUSG00000014551	376.548	-0.108094	0.0990006	1.09186	0.274896	0.848372	6	92146506	92161014	protein_coding	Mrps25
1503	ENSMUSG00000014554	198.09	-0.0208515	0.133034	0.156739	0.875451	0.984466	6	83457199	83483951	protein_coding	Dguok
1504	ENSMUSG00000014592	6737.83	-0.087662	0.071025	1.23424	0.217113	0.816566	4	151143982	151946333	protein_coding	Camta1
1505	ENSMUSG00000014599	599.399	0.00526127	0.0844849	-0.0622747	0.950344	0.993498	3	107648364	107667785	protein_coding	Csf1
1506	ENSMUSG00000014601	1481.81	0.014411	0.0701922	-0.205308	0.837331	0.983277	3	107519848	107539010	protein_coding	Strip1
1507	ENSMUSG00000014602	27691.5	0.00898131	0.0575115	-0.156165	0.875903	0.984466	1	92943186	93029673	protein_coding	Kif1a
1508	ENSMUSG00000014603	1.84427	1.30356	1.19013	-1.09531	0.27338	NA	3	107502347	107513092	protein_coding	Alx3
1509	ENSMUSG00000014606	1558.66	0.120076	0.0829655	-1.44731	0.147811	0.767404	11	70535022	70538305	protein_coding	Slc25a11
1510	ENSMUSG00000014609	0.355157	-1.10493	1.89991	0.58157	0.560856	NA	11	70505709	70510042	protein_coding	Chrne
1511	ENSMUSG00000014633	117.774	0.0305832	0.182048	-0.167995	0.866587	0.984112	8	117615424	117648194	protein_coding	Cmc2
1512	ENSMUSG00000014668	522.323	-0.0670881	0.103138	0.650471	0.515388	0.907925	5	110283708	110319838	protein_coding	Chfr
1513	ENSMUSG00000014686	9.12475	-0.127326	0.536376	0.237382	0.812361	NA	7	19586022	19595224	protein_coding	Ceacam16
1514	ENSMUSG00000014704	0.253778	16.2261	273.835	-0.059255	0.952749	NA	6	52139397	52141811	protein_coding	Hoxa2
1515	ENSMUSG00000014725	0.622185	0.446429	1.50704	-0.296229	0.767055	NA	14	68843476	68893291	protein_coding	Adam28
1516	ENSMUSG00000014747	22.7105	-0.542829	0.350677	1.54795	0.121635	NA	6	83739626	83745308	protein_coding	Ankrd53
1517	ENSMUSG00000014748	545.75	0.0566927	0.0863402	-0.65662	0.511425	0.907205	6	83745867	83752795	protein_coding	Tex261
1518	ENSMUSG00000014763	1540.18	0.0219753	0.0678164	-0.324041	0.745907	0.965999	17	15616464	15653845	protein_coding	Fam120b
1519	ENSMUSG00000014767	434.798	-0.0670488	0.0930214	0.720789	0.471039	0.901076	17	15720150	15748641	protein_coding	Tbp
1520	ENSMUSG00000014769	1586.76	0.112238	0.101324	-1.10771	0.267987	0.846227	17	15695283	15720013	protein_coding	Psmb1
1521	ENSMUSG00000014771	0	NA	NA	NA	NA	NA	17	15739470	15747563	protein_coding	Pdcd2
1522	ENSMUSG00000014773	168.542	0.163072	0.16469	-0.990175	0.322088	0.863892	17	15587616	15597134	protein_coding	Dll1
1523	ENSMUSG00000014776	204.906	-0.166787	0.147118	1.1337	0.256922	0.842404	8	106002772	106008571	protein_coding	Nol3
1524	ENSMUSG00000014778	149.132	-0.142361	0.151076	0.94231	0.346034	0.870226	8	106055795	106074585	protein_coding	Fhod1
1525	ENSMUSG00000014782	73.2514	-0.213078	0.233695	0.911778	0.361885	0.875822	8	106099906	106109494	protein_coding	Plekhg4
1526	ENSMUSG00000014786	612.18	-0.0743567	0.0857537	0.867095	0.38589	0.879539	8	106075475	106096513	protein_coding	Slc9a5
1527	ENSMUSG00000014791	143.133	0.299723	0.200248	-1.49676	0.134456	0.751036	8	106032233	106037392	protein_coding	Elmo3
1528	ENSMUSG00000014813	85.7321	-0.385135	0.314531	1.22447	0.220774	0.818611	14	69266687	69279253	protein_coding	Stc1
1529	ENSMUSG00000014837	315.15	-0.209464	0.110808	1.89033	0.0587134	0.618295	8	106007041	106016496	protein_coding	Matcap1
1530	ENSMUSG00000014846	1467.51	0.0982521	0.0778855	-1.26149	0.207131	0.808866	8	106194125	106198158	protein_coding	Tppp3
1531	ENSMUSG00000014850	280.3	0.115282	0.114472	-1.00708	0.313898	0.863714	13	92348380	92491511	protein_coding	Msh3
1532	ENSMUSG00000014852	4.40326	0.643945	0.951938	-0.676456	0.498751	NA	2	26863428	26899640	protein_coding	Adamts13
1533	ENSMUSG00000014856	178.426	0.0375659	0.150877	-0.248983	0.803374	0.976486	8	106052986	106061851	protein_coding	Tmem208
1534	ENSMUSG00000014859	328.109	0.0500437	0.108799	-0.459967	0.64554	0.94008	8	106024295	106032002	protein_coding	E2f4
1535	ENSMUSG00000014867	1106.18	0.187197	0.0758158	-2.4691	0.0135453	0.399	2	26810052	26823940	protein_coding	Surf4
1536	ENSMUSG00000014873	379.07	0.176242	0.126806	-1.38986	0.164571	0.779023	2	26806379	26810195	protein_coding	Surf2
1537	ENSMUSG00000014905	751.024	0.0304703	0.0966382	-0.315303	0.752532	0.967071	12	44252342	44257109	protein_coding	Dnajb9
1538	ENSMUSG00000014907	231.203	-0.0709955	0.126997	0.559035	0.576138	0.924794	8	67312869	67343216	protein_coding	Naf1
1539	ENSMUSG00000014932	217.717	-0.0923774	0.133735	0.69075	0.489722	0.903054	5	32768515	32844401	protein_coding	Yes1
1540	ENSMUSG00000014956	3119.69	-0.0379519	0.071452	0.531152	0.595313	0.928837	5	32616187	32674777	protein_coding	Ppp1cb
1541	ENSMUSG00000014959	1491.15	0.0677066	0.0789531	-0.857555	0.391138	0.88157	2	70491920	70542980	protein_coding	Gorasp2
1542	ENSMUSG00000014980	243.025	-0.0197765	0.120227	0.164493	0.869343	0.984328	1	152246486	152262439	protein_coding	Tsen15
1543	ENSMUSG00000015001	1.01432	-2.87521	1.89815	1.51475	0.129837	NA	15	65747902	65784246	protein_coding	Oc90
1544	ENSMUSG00000015002	1403.61	-0.0463411	0.0716806	0.646494	0.51796	0.908825	15	65658883	65745665	protein_coding	Efr3a
1545	ENSMUSG00000015013	475.801	0.224594	0.0951366	-2.36075	0.0182381	0.432058	8	123338379	123343399	protein_coding	Trappc2l
1546	ENSMUSG00000015016	384.473	-0.0709726	0.0989647	0.71715	0.473281	0.901508	8	123502225	123544619	protein_coding	Acsf3
1547	ENSMUSG00000015023	333.19	0.0847381	0.106157	-0.79823	0.424737	0.886954	8	111701628	111724432	protein_coding	Ddx19a
1548	ENSMUSG00000015027	215.184	0.0266628	0.129058	-0.206595	0.836326	0.983135	8	123304981	123338202	protein_coding	Galns
1549	ENSMUSG00000015053	29.9722	0.514133	0.338353	-1.51952	0.128632	NA	6	88170873	88184014	protein_coding	Gata2
1550	ENSMUSG00000015083	59.7606	0.0949924	0.254815	-0.372789	0.709305	NA	2	25388663	25391731	protein_coding	C8g
1551	ENSMUSG00000015085	240.23	0.0728387	0.12099	-0.602022	0.547159	0.915155	2	25285886	25291333	protein_coding	Entpd2
1552	ENSMUSG00000015087	2144.71	0.0305011	0.0607677	-0.50193	0.615717	0.934801	2	25473030	25498533	protein_coding	Rabl6
1553	ENSMUSG00000015090	2484.97	0.214393	0.257324	-0.833164	0.404752	0.88333	2	25356721	25360058	protein_coding	Ptgds
1554	ENSMUSG00000015092	886.209	0.0705683	0.0795082	-0.887559	0.374778	0.877628	2	25447859	25452094	protein_coding	Edf1
1555	ENSMUSG00000015093	19.8861	1.01353	0.413587	-2.45058	0.0142627	NA	2	25346850	25348788	protein_coding	Clic3
1556	ENSMUSG00000015094	2523.16	0.00520524	0.0722036	-0.0720912	0.942529	0.992522	2	25289363	25299506	protein_coding	Npdc1
1557	ENSMUSG00000015095	1306.5	-0.0839946	0.0756778	1.1099	0.267043	0.8457	2	25390762	25395483	protein_coding	Fbxw5
1558	ENSMUSG00000015112	60.2592	0.0892214	0.238333	-0.374356	0.708139	NA	6	6041218	6217173	protein_coding	Slc25a13
1559	ENSMUSG00000015120	1395.93	-0.0441463	0.0666221	0.662638	0.507563	0.906945	17	25479482	25493856	protein_coding	Ube2i
1560	ENSMUSG00000015126	175.478	0.0722294	0.139995	-0.515943	0.605894	0.931689	17	25459141	25461773	protein_coding	Tsr3
1561	ENSMUSG00000015127	403.356	-0.098035	0.0955372	1.02615	0.304823	0.86143	17	25407371	25453417	protein_coding	Unkl
1562	ENSMUSG00000015133	51.4583	0.148673	0.261613	-0.568293	0.569836	NA	7	65876660	66038098	protein_coding	Lrrk1
1563	ENSMUSG00000015134	6.61827	-0.547022	0.719832	0.759929	0.447297	NA	7	66040638	66077265	protein_coding	Aldh1a3
1564	ENSMUSG00000015143	715.012	-0.00884671	0.0794823	0.111304	0.911375	0.987849	12	80214321	80307145	protein_coding	Actn1
1565	ENSMUSG00000015149	2026.31	0.0247517	0.0900368	-0.274907	0.783388	0.970529	7	28466160	28488086	protein_coding	Sirt2
1566	ENSMUSG00000015165	3067.2	0.0310259	0.0628549	-0.493611	0.621581	0.937479	7	28507966	28521691	protein_coding	Hnrnpl
1567	ENSMUSG00000015176	1059.34	0.0341173	0.0811251	-0.420552	0.674082	0.945723	19	46064302	46073969	protein_coding	Nolc1
1568	ENSMUSG00000015189	1448.61	0.0548401	0.0773037	-0.709411	0.478069	0.901527	6	4600839	4643355	protein_coding	Casd1
1569	ENSMUSG00000015202	77.3593	-0.00918401	0.209301	0.0438795	0.965	0.995434	10	7069063	7162237	protein_coding	Cnksr3
1570	ENSMUSG00000015214	548.942	-0.203766	0.0885197	2.30193	0.0213389	0.447138	X	70408366	70462802	protein_coding	Mtmr1
1571	ENSMUSG00000015217	422.001	0.171872	0.0944436	-1.81984	0.0687837	0.642738	X	70599524	70604282	protein_coding	Hmgb3
1572	ENSMUSG00000015222	22739.6	-0.115608	0.0633799	1.82405	0.068145	0.640065	1	66214432	66481742	protein_coding	Map2
1573	ENSMUSG00000015224	636.203	0.177956	0.128554	-1.38429	0.16627	0.779083	4	96456666	96479815	protein_coding	Cyp2j9
1574	ENSMUSG00000015242	0	NA	NA	NA	NA	NA	4	52989272	53001162	protein_coding	Nipsnap3a
1575	ENSMUSG00000015243	1120.95	-0.0624633	0.0800169	0.780627	0.435022	0.888606	4	53030787	53159895	protein_coding	Abca1
1576	ENSMUSG00000015247	146.826	0.126303	0.177464	-0.711711	0.476644	0.901527	4	53011880	53022060	protein_coding	Nipsnap3b
1577	ENSMUSG00000015289	127.645	0.257666	0.201069	-1.28148	0.200026	0.805358	X	73394882	73397224	protein_coding	Lage3
1578	ENSMUSG00000015290	704.374	0.0880379	0.0921721	-0.955147	0.339503	0.870226	X	73409324	73416824	protein_coding	Ubl4a
1579	ENSMUSG00000015291	10585.6	-0.0107375	0.0588766	0.182373	0.85529	0.984112	X	73348604	73355468	protein_coding	Gdi1
1580	ENSMUSG00000015305	2633.72	-0.0120643	0.0838441	0.14389	0.885587	0.985582	10	8597983	8761814	protein_coding	Sash1
1581	ENSMUSG00000015312	46.8026	0.500776	0.358327	-1.39754	0.162252	NA	10	80765907	80768038	protein_coding	Gadd45b
1582	ENSMUSG00000015314	2.01917	1.25058	1.16572	-1.0728	0.28336	NA	1	171745082	171780737	protein_coding	Slamf6
1583	ENSMUSG00000015316	8.16582	0.148202	0.628837	-0.235677	0.813684	NA	1	171594695	171628752	protein_coding	Slamf1
1584	ENSMUSG00000015335	68.8914	-0.507852	0.235054	2.16058	0.0307279	0.502368	2	29980956	29983660	protein_coding	Zdhhc12
1585	ENSMUSG00000015337	44.2806	-0.0822536	0.324958	0.253121	0.800175	NA	2	30061505	30064081	protein_coding	Endog
1586	ENSMUSG00000015340	6.13806	0.181121	0.659693	-0.274553	0.78366	NA	X	9301491	9354010	protein_coding	Cybb
1587	ENSMUSG00000015341	845.842	0.00103931	0.079005	-0.013155	0.989504	0.997913	8	23731362	23747090	protein_coding	Golga7
1588	ENSMUSG00000015342	401.03	-0.0979502	0.107665	0.909765	0.362946	0.87644	X	9138995	9179489	protein_coding	Xk
1589	ENSMUSG00000015354	91.1293	-0.417179	0.227617	1.83281	0.0668301	0.637198	9	95519654	95580149	protein_coding	Pcolce2
1590	ENSMUSG00000015355	6.9665	0.723813	0.761995	-0.949892	0.342167	NA	1	171509577	171532826	protein_coding	Cd48
1591	ENSMUSG00000015357	416.928	0.0879152	0.094671	-0.92864	0.353076	0.87101	9	65201542	65237940	protein_coding	Clpx
1592	ENSMUSG00000015363	424.819	0.0954668	0.0954183	-1.00051	0.317065	0.863892	15	88959327	88971280	protein_coding	Trabd
1593	ENSMUSG00000015365	3.00424	-1.06738	1.0717	0.995962	0.319269	NA	15	88867112	88939355	protein_coding	Mov10l1
1594	ENSMUSG00000015377	1372.74	-0.0721566	0.0832913	0.866316	0.386317	0.879539	15	89066416	89080699	protein_coding	Dennd6b
1595	ENSMUSG00000015396	1059.72	0.127384	0.127371	-1.00011	0.317259	0.863892	13	43938251	43956608	protein_coding	Cd83
1596	ENSMUSG00000015401	1.01236	0.186515	1.59868	-0.116668	0.907123	NA	X	162871826	162901856	protein_coding	Cltrn
1597	ENSMUSG00000015405	13.7774	-0.411911	0.435743	0.945308	0.344502	NA	X	162922328	162971416	protein_coding	Ace2
1598	ENSMUSG00000015437	0.114134	-14.5802	197.814	0.0737068	0.941244	NA	14	56496295	56499717	protein_coding	Gzmb
1599	ENSMUSG00000015441	0	NA	NA	NA	NA	NA	14	56442720	56448874	protein_coding	Gzmf
1600	ENSMUSG00000015443	0.21007	15.3644	280.128	-0.0548479	0.95626	NA	14	56403254	56412056	protein_coding	Gzmn
1601	ENSMUSG00000015451	46.7183	0.411417	0.297868	-1.38121	0.167216	NA	17	35028069	35042440	protein_coding	C4a
1602	ENSMUSG00000015452	23.7719	-0.308399	0.41035	0.751551	0.452321	NA	17	34816836	34819910	protein_coding	Ager
1603	ENSMUSG00000015461	466.099	-0.15279	0.092131	1.6584	0.0972361	0.699301	17	34866120	34874048	protein_coding	Atf6b
1604	ENSMUSG00000015467	10.872	0.123673	0.493734	-0.250485	0.802213	NA	17	34832323	34834945	protein_coding	Egfl8
1605	ENSMUSG00000015468	75.5042	0.559005	0.226768	-2.4651	0.0136976	0.399	17	34783242	34807477	protein_coding	Notch4
1606	ENSMUSG00000015474	237.882	-0.0273591	0.123124	0.222209	0.824151	0.981196	17	34835636	34847484	protein_coding	Ppt2
1607	ENSMUSG00000015476	1308.49	-0.0401709	0.0957178	0.41968	0.674719	0.945864	17	34848507	34852100	protein_coding	Prrt1
1608	ENSMUSG00000015478	325.796	-0.00360423	0.107109	0.0336501	0.973156	0.995795	17	34820065	34822664	protein_coding	Rnf5
1609	ENSMUSG00000015484	30.522	-0.53495	0.369988	1.44586	0.148218	NA	1	155951712	156032596	protein_coding	Fam163a
1610	ENSMUSG00000015488	740.223	0.0233593	0.0847097	-0.275757	0.782734	0.97046	2	26899938	26911101	protein_coding	Cacfd1
1611	ENSMUSG00000015501	1340.5	-0.129528	0.0779813	1.66102	0.0967099	0.698417	10	13841819	14027118	protein_coding	Hivep2
1612	ENSMUSG00000015519	0	NA	NA	NA	NA	NA	10	28848284	28862299	protein_coding	2310057J18Rik
1613	ENSMUSG00000015522	719.406	-0.0379246	0.0899374	0.421678	0.67326	0.945373	3	95341699	95404551	protein_coding	Arnt
1614	ENSMUSG00000015533	13.5985	-0.233512	0.547957	0.426151	0.669998	NA	13	114969617	115068636	protein_coding	Itga2
1615	ENSMUSG00000015536	486.564	-0.0599454	0.0991714	0.604462	0.545536	0.914974	13	114954772	114968811	protein_coding	Mocs2
1616	ENSMUSG00000015542	142.649	0.220719	0.190066	-1.16128	0.245529	0.836703	11	115073658	115078685	protein_coding	Nat9
1617	ENSMUSG00000015568	39.0525	0.440303	0.334886	-1.31478	0.188582	NA	8	69333143	69360100	protein_coding	Lpl
1618	ENSMUSG00000015575	280.731	0.0146115	0.11601	-0.125951	0.899771	0.987055	17	26882205	26918621	protein_coding	Atp6v0e
1619	ENSMUSG00000015579	0	NA	NA	NA	NA	NA	17	27057638	27063983	protein_coding	Nkx2-5
1620	ENSMUSG00000015597	1390.03	-0.133331	0.0679739	1.9615	0.049821	0.589541	17	46694657	46731846	protein_coding	Zfp318
1621	ENSMUSG00000015599	2053.99	-0.0584423	0.0657818	0.888427	0.374311	0.877628	17	46753374	46798601	protein_coding	Ttbk1
1622	ENSMUSG00000015605	384.868	0.136608	0.112598	-1.21323	0.225041	0.820603	17	46859255	46867101	protein_coding	Srf
1623	ENSMUSG00000015619	0.245262	16.219	273.886	-0.0592183	0.952778	NA	2	9861889	9894845	protein_coding	Gata3
1624	ENSMUSG00000015627	0	NA	NA	NA	NA	NA	2	179966926	179976492	protein_coding	Gata5
1625	ENSMUSG00000015647	272.007	0.270275	0.213637	-1.26511	0.205831	0.806977	2	179818166	179867652	protein_coding	Lama5
1626	ENSMUSG00000015652	4.40179	0.266277	0.879431	-0.302783	0.762055	NA	5	5786317	5799326	protein_coding	Steap1
1627	ENSMUSG00000015653	461.904	-0.212324	0.119461	1.77736	0.0755094	0.665345	5	5714829	5744578	protein_coding	Steap2
1628	ENSMUSG00000015656	21226.3	0.120032	0.0784548	-1.52996	0.126028	0.739498	9	40712280	40721383	protein_coding	Hspa8
1629	ENSMUSG00000015659	372.416	-0.184506	0.106406	1.73398	0.0829219	0.673561	17	6092471	6130016	protein_coding	Serac1
1630	ENSMUSG00000015665	0	NA	NA	NA	NA	NA	X	99615857	99621811	protein_coding	Awat1
1631	ENSMUSG00000015668	302.584	0.0470645	0.117568	-0.400316	0.688924	0.94907	X	99666489	99670174	protein_coding	Pdzd11
1632	ENSMUSG00000015671	1321.92	0.135691	0.0841073	-1.6133	0.106678	0.710922	13	14787825	14848821	protein_coding	Psma2
1633	ENSMUSG00000015672	235.758	-0.0162401	0.162041	0.100222	0.920168	0.990416	13	14782769	14787750	protein_coding	Mrpl32
1634	ENSMUSG00000015697	869.441	-0.0693298	0.0835335	0.829964	0.406559	0.88333	3	95230836	95264513	protein_coding	Setdb1
1635	ENSMUSG00000015702	27.6925	0.340153	0.388154	-0.876335	0.380848	NA	3	95203407	95214487	protein_coding	Anxa9
1636	ENSMUSG00000015709	5191.3	0.0628895	0.0629428	-0.999153	0.31772	0.863892	7	83895486	84059384	protein_coding	Arnt2
1637	ENSMUSG00000015711	528.346	-0.0970181	0.0881213	1.10096	0.270914	0.848175	3	95160985	95189387	protein_coding	Prune1
1638	ENSMUSG00000015714	987.768	-0.121601	0.11064	1.09907	0.271737	0.848175	3	95222102	95230910	protein_coding	Cers2
1639	ENSMUSG00000015721	0	NA	NA	NA	NA	NA	7	23085314	23141347	protein_coding	Nlrp5
1640	ENSMUSG00000015733	1890.49	0.0227101	0.0800454	-0.283715	0.776629	0.970346	6	17636233	17666971	protein_coding	Capza2
1641	ENSMUSG00000015745	169.099	-0.0571549	0.141922	0.402719	0.687155	0.948377	3	95895741	95903313	protein_coding	Plekho1
1642	ENSMUSG00000015747	481.647	0.132284	0.0904474	-1.46255	0.143591	0.758946	3	95907144	95965778	protein_coding	Vps45
1643	ENSMUSG00000015748	358.68	0.234145	0.103158	-2.26977	0.0232215	0.460772	3	95737436	95763197	protein_coding	Prpf3
1644	ENSMUSG00000015749	1304.62	0.0584656	0.0744921	-0.784857	0.432537	0.888606	3	95836558	95854702	protein_coding	Anp32e
1645	ENSMUSG00000015750	368.119	0.122165	0.108529	-1.12565	0.260314	0.844362	3	95801281	95805600	protein_coding	Aph1a
1646	ENSMUSG00000015755	1177.03	0.0383002	0.0754947	-0.507323	0.611928	0.933781	10	7781417	7831994	protein_coding	Tab2
1647	ENSMUSG00000015757	632.898	-0.156099	0.089637	1.74145	0.0816041	0.673379	10	7668655	7698899	protein_coding	Ppil4
1648	ENSMUSG00000015759	663.675	-0.0466801	0.09089	0.513589	0.607539	0.932386	14	47013024	47025868	protein_coding	Cnih1
1649	ENSMUSG00000015766	760.095	-0.0859087	0.0887735	0.967729	0.33318	0.868246	6	137454243	137631874	protein_coding	Eps8
1650	ENSMUSG00000015776	432.871	0.105244	0.0960725	-1.09546	0.273314	0.848175	2	26795274	26800689	protein_coding	Med22
1651	ENSMUSG00000015787	0	NA	NA	NA	NA	NA	2	26732515	26754991	protein_coding	Abo
1652	ENSMUSG00000015790	719.795	0.15304	0.0938824	-1.63012	0.103075	0.70246	2	26803393	26806542	protein_coding	Surf1
1653	ENSMUSG00000015804	667.757	-0.0296081	0.0796166	0.371884	0.709979	0.954024	5	45677571	45686618	protein_coding	Med28
1654	ENSMUSG00000015806	1365.01	0.00342732	0.120631	-0.0284115	0.977334	0.99624	5	45591363	45607578	protein_coding	Qdpr
1655	ENSMUSG00000015812	33.6876	0.118901	0.399536	-0.297599	0.76601	NA	14	67982630	67986888	protein_coding	Gnrh1
1656	ENSMUSG00000015829	3082.27	-0.239118	0.0687055	3.48034	0.000500787	0.0942802	1	159351339	159759299	protein_coding	Tnr
1657	ENSMUSG00000015837	7697.31	0.0412759	0.065859	-0.626731	0.530835	0.911447	11	50090193	50101654	protein_coding	Sqstm1
1658	ENSMUSG00000015839	242.961	0.0588388	0.123631	-0.475922	0.63413	0.938178	2	75505857	75534985	protein_coding	Nfe2l2
1659	ENSMUSG00000015843	229.913	0.00331403	0.2037	-0.0162692	0.98702	0.997707	1	167425953	167467192	protein_coding	Rxrg
1660	ENSMUSG00000015846	1119.57	0.0181686	0.0781666	-0.232434	0.816201	0.979104	2	27566452	27652969	protein_coding	Rxra
1661	ENSMUSG00000015850	153.746	-0.118171	0.240453	0.491454	0.623106	0.937507	3	95583511	95595228	protein_coding	Adamtsl4
1662	ENSMUSG00000015852	179.899	0.0199862	0.157098	-0.127221	0.898765	0.987055	3	87158065	87171045	protein_coding	Fcrl2
1663	ENSMUSG00000015854	0.63593	-0.722876	1.50568	0.480098	0.631157	NA	3	87265188	87278380	protein_coding	Cd5l
1664	ENSMUSG00000015869	625.564	-0.0356259	0.0885589	0.402285	0.687474	0.948539	11	116361671	116385461	protein_coding	Prpsap1
1665	ENSMUSG00000015879	104.567	-0.539277	0.19435	2.77477	0.00552409	0.283075	5	45687047	45796956	protein_coding	Fam184b
1666	ENSMUSG00000015880	2.89155	0.999284	0.973445	-1.02654	0.304635	NA	5	45827261	45857888	protein_coding	Ncapg
1667	ENSMUSG00000015882	500.971	-0.213494	0.0960121	2.22361	0.0261747	0.4793	5	45854523	46014957	protein_coding	Lcorl
1668	ENSMUSG00000015889	687.68	0.0059548	0.0800556	-0.0743833	0.940705	0.992473	10	93289273	93320737	protein_coding	Lta4h
1669	ENSMUSG00000015890	0.596675	-2.07887	1.77184	1.17328	0.240682	NA	10	93359200	93375895	protein_coding	Amdhd1
1670	ENSMUSG00000015932	1583.47	-0.0180743	0.0639101	0.282808	0.777324	0.970346	2	143757240	143785244	protein_coding	Dstn
1671	ENSMUSG00000015937	1153	0.0174656	0.0694508	-0.251481	0.801442	0.975676	13	56221432	56284174	protein_coding	Macroh2a1
1672	ENSMUSG00000015942	465.164	-0.0237268	0.119124	0.199177	0.842125	0.98365	5	134212858	134253209	protein_coding	Gtf2ird2
1673	ENSMUSG00000015943	94.9214	-0.062527	0.258011	0.242342	0.808515	0.977058	3	96103904	96127025	protein_coding	Bola1
1674	ENSMUSG00000015944	3964.89	-0.0474132	0.0597321	0.793764	0.427333	0.887278	5	134128550	134173182	protein_coding	Castor2
1675	ENSMUSG00000015947	31.7685	0.364503	0.371755	-0.980493	0.326843	NA	3	96190225	96201285	protein_coding	Fcgr1
1676	ENSMUSG00000015950	74.2039	-0.224234	0.215883	1.03869	0.298951	0.8571	5	134248907	134258479	protein_coding	Ncf1
1677	ENSMUSG00000015957	17.9634	-0.154363	0.441758	0.349429	0.726768	NA	7	98484319	98504402	protein_coding	Wnt11
1678	ENSMUSG00000015961	1110.42	0.121035	0.083327	-1.45253	0.146355	0.765062	1	177590528	177624077	protein_coding	Adss2
1679	ENSMUSG00000015962	1.13045	0.0995016	1.42322	-0.0699131	0.944263	NA	1	177557380	177580890	protein_coding	Spmip3
1680	ENSMUSG00000015966	21.8037	-0.121509	0.351249	0.345934	0.729392	NA	14	29718092	29730853	protein_coding	Il17rb
1681	ENSMUSG00000015968	1324.73	-0.149063	0.100943	1.4767	0.139756	0.754201	14	29761896	30213412	protein_coding	Cacna1d
1682	ENSMUSG00000015970	77.6011	-0.0258228	0.304123	0.0849091	0.932334	0.992374	14	29730980	29762484	protein_coding	Chdh
1683	ENSMUSG00000015971	967.101	0.0883828	0.0775121	-1.14025	0.254184	0.841245	14	29700294	29728311	protein_coding	Actr8
1684	ENSMUSG00000015980	167.876	0.00774528	0.146141	-0.0529988	0.957733	0.994944	7	138792904	138822895	protein_coding	Lrrc27
1685	ENSMUSG00000015981	1128.86	-0.0297989	0.0760402	0.391883	0.695144	0.9516	7	138683554	138793223	protein_coding	Stk32c
1686	ENSMUSG00000015994	850.829	0.0675016	0.079712	-0.846819	0.397096	0.882952	8	26488750	26505678	protein_coding	Fnta
1687	ENSMUSG00000016018	976.602	0.0601148	0.0699195	-0.859771	0.389915	0.880832	13	113003952	113063932	protein_coding	Mtrex
1688	ENSMUSG00000016024	171.794	0.137497	0.487108	-0.282272	0.777735	0.970346	2	158148413	158174772	protein_coding	Lbp
1689	ENSMUSG00000016028	198.641	0.339026	0.419108	-0.808924	0.418559	0.886392	15	85783130	85918404	protein_coding	Celsr1
1690	ENSMUSG00000016087	38.2848	-0.428022	0.283342	1.51062	0.130885	NA	9	32333500	32454157	protein_coding	Fli1
1691	ENSMUSG00000016128	205.174	0.0136961	0.182867	-0.0748966	0.940297	0.992473	5	150960975	151157301	protein_coding	Stard13
1692	ENSMUSG00000016150	1618.83	-0.218414	0.0908147	2.40505	0.0161704	0.419276	X	41616743	42518003	protein_coding	Tenm1
1693	ENSMUSG00000016179	709.696	0.0846927	0.106932	-0.792027	0.428345	0.888141	1	193028654	193052606	protein_coding	Camk1g
1694	ENSMUSG00000016181	237.257	-0.0851041	0.155593	0.546967	0.584401	0.927302	1	192773412	192812580	protein_coding	Utp25
1695	ENSMUSG00000016194	88.9721	0.217285	0.214376	-1.01357	0.310788	0.863714	1	192903942	192946383	protein_coding	Hsd11b1
1696	ENSMUSG00000016200	518.243	-0.14681	0.0876167	1.6756	0.0938171	0.690674	1	192573541	192718083	protein_coding	Syt14
1697	ENSMUSG00000016206	37.9566	-0.22177	0.326528	0.679175	0.497027	NA	17	37581111	37585375	protein_coding	H2-M3
1698	ENSMUSG00000016239	137.023	0.0338313	0.192288	-0.175941	0.86034	0.984112	X	35592006	35625994	protein_coding	Lonrf3
1699	ENSMUSG00000016252	525.589	0.0892589	0.103211	-0.864816	0.38714	0.879778	2	174302865	174305898	protein_coding	Atp5f1e
1700	ENSMUSG00000016253	698.073	0.102741	0.087025	-1.18059	0.237764	0.830664	2	174257597	174269295	protein_coding	Nelfcd
1701	ENSMUSG00000016255	1.49015	0.0766088	1.25216	-0.0611815	0.951215	NA	2	174292488	174299675	protein_coding	Tubb1
1702	ENSMUSG00000016256	418.395	0.185089	0.0962442	-1.92312	0.0544654	0.60693	2	174269286	174280832	protein_coding	Ctsz
1703	ENSMUSG00000016257	486.227	0.115013	0.0900587	-1.27709	0.201571	0.805358	2	174306860	174314874	protein_coding	Prelid3b
1704	ENSMUSG00000016262	252.144	-0.193829	0.118821	1.63127	0.102833	0.70246	1	192526796	192538064	protein_coding	Sertad4
1705	ENSMUSG00000016283	0	NA	NA	NA	NA	NA	17	37791742	37794443	protein_coding	H2-M2
1706	ENSMUSG00000016308	301.19	-0.0754316	0.132834	0.567863	0.570128	0.92258	X	36064828	36147875	protein_coding	Ube2a
1707	ENSMUSG00000016319	1985.57	0.0922136	0.0916545	-1.0061	0.314368	0.863892	X	36059304	36062460	protein_coding	Slc25a5
1708	ENSMUSG00000016327	0.420139	16.692	270.612	-0.0616824	0.950816	NA	X	37405061	37425646	protein_coding	Atp1b4
1709	ENSMUSG00000016344	353.224	0.240658	0.103002	-2.33643	0.0194687	0.440301	2	180829040	180830564	protein_coding	Ppdpf
1710	ENSMUSG00000016346	6377.75	-0.0499299	0.0631904	0.79015	0.42944	0.88836	2	180717372	180777093	protein_coding	Kcnq2
1711	ENSMUSG00000016349	9685.45	0.0463071	0.0633942	-0.730463	0.465107	0.900731	2	180778581	180798807	protein_coding	Eef1a2
1712	ENSMUSG00000016356	42.2533	-0.62223	0.301564	2.06334	0.0390801	NA	2	180628328	180660156	protein_coding	Col20a1
1713	ENSMUSG00000016382	1277.21	0.00727903	0.0847103	-0.0859284	0.931523	0.992306	X	74829260	74918788	protein_coding	Pls3
1714	ENSMUSG00000016386	194.363	0.141033	0.207175	-0.680743	0.496034	0.904829	2	106523614	106698701	protein_coding	Mpped2
1715	ENSMUSG00000016409	301.946	0.142015	0.110846	-1.28119	0.200126	0.805358	X	36390448	36414399	protein_coding	Nkap
1716	ENSMUSG00000016427	352.843	0.227837	0.13419	-1.69786	0.0895336	0.682438	X	36451241	36454816	protein_coding	Ndufa1
1717	ENSMUSG00000016458	0.114134	-14.5802	197.814	0.0737068	0.941244	NA	2	104956874	105003961	protein_coding	Wt1
1718	ENSMUSG00000016477	268.924	0.0856584	0.115885	-0.739168	0.459805	0.89851	13	30090558	30170046	protein_coding	E2f3
1719	ENSMUSG00000016481	316.835	0.0145323	0.133681	-0.108708	0.913434	0.988223	1	194779690	194813894	protein_coding	Cr1l
1720	ENSMUSG00000016487	556.537	0.0419294	0.117445	-0.357014	0.721081	0.959149	6	146789985	146933523	protein_coding	Ppfibp1
1721	ENSMUSG00000016493	140.624	-0.179669	0.161788	1.11052	0.266773	0.8457	1	194719134	194774557	protein_coding	Cd46
1722	ENSMUSG00000016494	137.077	-0.0836088	0.178097	0.469457	0.638743	0.938178	1	194621127	194643587	protein_coding	Cd34
1723	ENSMUSG00000016495	215.064	0.208177	0.138171	-1.50666	0.131898	0.747423	19	29325999	29344790	protein_coding	Plgrkt
1724	ENSMUSG00000016496	76.6046	0.0351369	0.235151	-0.149422	0.88122	0.984962	19	29344855	29365495	protein_coding	Cd274
1725	ENSMUSG00000016498	0.992122	-2.64368	4.02377	0.657016	0.511171	NA	19	29388319	29448561	protein_coding	Pdcd1lg2
1726	ENSMUSG00000016503	62.0872	-0.407217	0.26722	1.5239	0.127534	NA	5	146885467	146892424	protein_coding	Gtf3a
1727	ENSMUSG00000016510	151.192	0.255458	0.15057	-1.6966	0.0897716	0.682438	5	146888383	146900610	protein_coding	Mtif3
1728	ENSMUSG00000016520	49.8446	0.136239	0.269097	-0.506283	0.612658	NA	5	146953465	147013396	protein_coding	Lnx2
1729	ENSMUSG00000016524	0.420139	16.692	270.612	-0.0616824	0.950816	NA	1	130860393	130867852	protein_coding	Il19
1730	ENSMUSG00000016526	112.169	0.173134	0.194844	-0.888574	0.374232	0.877628	1	131055192	131066077	protein_coding	Dyrk3
1731	ENSMUSG00000016528	382.651	0.0977352	0.102039	-0.957823	0.338152	0.870226	1	130981437	131025563	protein_coding	Mapkapk2
1732	ENSMUSG00000016529	0	NA	NA	NA	NA	NA	1	130947582	130952711	protein_coding	Il10
1733	ENSMUSG00000016534	1059.57	0.0880798	0.0898495	-0.980304	0.326936	0.865332	X	37490234	37545331	protein_coding	Lamp2
1734	ENSMUSG00000016541	4207.14	0.0879557	0.0738501	-1.191	0.233652	0.826076	15	85220446	85347413	protein_coding	Atxn10
1735	ENSMUSG00000016552	788.426	-0.181461	0.0776002	2.33841	0.0193662	0.440301	15	77824722	77840922	protein_coding	Foxred2
1736	ENSMUSG00000016554	554.429	0.0502672	0.0856565	-0.586847	0.557307	0.918696	15	77843198	77855013	protein_coding	Eif3d
1737	ENSMUSG00000016559	2954.06	0.132531	0.0685558	-1.93319	0.0532131	0.603426	11	115912738	115918788	protein_coding	H3f3b
1738	ENSMUSG00000016619	809.024	-0.0109677	0.0764004	0.143556	0.885851	0.985582	15	84807612	84827164	protein_coding	Nup50
1739	ENSMUSG00000016624	159.71	0.142871	0.211129	-0.676703	0.498595	0.905486	15	84669582	84740250	protein_coding	Phf21b
1740	ENSMUSG00000016626	0	NA	NA	NA	NA	NA	7	106766197	106797309	protein_coding	Nlrp14
1741	ENSMUSG00000016637	300.919	0.294655	0.119169	-2.47258	0.0134143	0.399	15	78043663	78058307	protein_coding	Ift27
1742	ENSMUSG00000016664	781.4	-0.00883103	0.0748324	0.118011	0.906059	0.987251	15	83259808	83348807	protein_coding	Pacsin2
1743	ENSMUSG00000016756	2.15458	1.47014	1.35881	-1.08193	0.279284	NA	13	24511387	24661360	protein_coding	Cmah
1744	ENSMUSG00000016757	310.34	0.0325721	0.109329	-0.297927	0.765759	0.96987	15	83459291	83479358	protein_coding	Ttll12
1745	ENSMUSG00000016758	0.114134	-14.5802	197.814	0.0737068	0.941244	NA	15	83411063	83428835	protein_coding	Bik
1746	ENSMUSG00000016763	130.004	-0.101727	0.160615	0.633357	0.5265	0.91046	15	83489200	83609222	protein_coding	Scube1
1747	ENSMUSG00000016831	1105.5	0.0553374	0.0831297	-0.665676	0.505618	0.906945	14	52516603	52533858	protein_coding	Tox4
1748	ENSMUSG00000016833	120.076	0.247103	0.198461	-1.24509	0.213098	0.811496	5	100946493	100952337	protein_coding	Mrps18c
1749	ENSMUSG00000016918	470.706	-0.129327	0.105326	1.22786	0.219498	0.817207	1	12762501	12931416	protein_coding	Sulf1
1750	ENSMUSG00000016921	1664.09	-0.0522897	0.0732407	0.713943	0.475262	0.901527	2	162773448	162779041	protein_coding	Srsf6
1751	ENSMUSG00000016933	1581.72	0.000701611	0.0699882	-0.0100247	0.992002	0.998534	2	160573220	160617680	protein_coding	Plcg1
1752	ENSMUSG00000016940	806.396	0.0247835	0.0770221	-0.321771	0.747627	0.966131	11	115310954	115322100	protein_coding	Kctd2
1753	ENSMUSG00000016942	11.649	-0.75375	0.479723	1.57122	0.116132	NA	15	78323867	78352834	protein_coding	Tmprss6
1754	ENSMUSG00000016946	365.263	-0.00690948	0.100588	0.0686909	0.945236	0.993119	17	24266708	24292459	protein_coding	Kctd5
1755	ENSMUSG00000016982	0	NA	NA	NA	NA	NA	13	22165364	22172904	protein_coding	Pom121l2
1756	ENSMUSG00000016984	134.99	0.149926	0.158968	-0.94312	0.34562	0.870226	11	17888756	17903875	protein_coding	Etaa1
1757	ENSMUSG00000016995	141.065	-0.0410552	0.155427	0.264144	0.791669	0.972256	2	164231313	164247080	protein_coding	Matn4
1758	ENSMUSG00000016998	0	NA	NA	NA	NA	NA	2	164117872	164120379	protein_coding	Svs4
1759	ENSMUSG00000017000	0	NA	NA	NA	NA	NA	2	164158671	164160373	protein_coding	Svs6
1760	ENSMUSG00000017002	3.84202	0.957049	0.905006	-1.05751	0.290281	NA	2	164195990	164231015	protein_coding	Slpi
1761	ENSMUSG00000017003	0	NA	NA	NA	NA	NA	2	164131188	164133420	protein_coding	Svs3a
1762	ENSMUSG00000017004	0	NA	NA	NA	NA	NA	2	164174660	164176316	protein_coding	Svs5
1763	ENSMUSG00000017007	9.92512	-0.533226	0.51498	1.03543	0.300468	NA	2	164245061	164257368	protein_coding	Rbpjl
1764	ENSMUSG00000017009	1214.22	0.0254662	0.0803658	-0.316879	0.751336	0.967039	2	164266167	164285807	protein_coding	Sdc4
1765	ENSMUSG00000017049	0	NA	NA	NA	NA	NA	8	22459791	22464057	protein_coding	Ccdc70
1766	ENSMUSG00000017057	190.712	-0.0982464	0.158556	0.619631	0.535501	0.913201	X	35375763	35434912	protein_coding	Il13ra1
1767	ENSMUSG00000017064	0	NA	NA	NA	NA	NA	13	28326467	28335594	protein_coding	Prl5a1
1768	ENSMUSG00000017119	2439.03	-0.0450889	0.0641938	0.702386	0.482438	0.902077	11	101442975	101472777	protein_coding	Nbr1
1769	ENSMUSG00000017132	882.928	-0.0921762	0.075893	1.21455	0.224536	0.820603	11	118022845	118139386	protein_coding	Cyth1
1770	ENSMUSG00000017144	447.075	-0.171959	0.115855	1.48425	0.137741	0.752547	2	51020450	51039123	protein_coding	Rnd3
1771	ENSMUSG00000017146	28.5519	-0.469357	0.34264	1.36983	0.170741	NA	11	101379590	101442781	protein_coding	Brca1
1772	ENSMUSG00000017165	12.7592	0.560112	0.552179	-1.01437	0.310408	NA	11	100225233	100227822	protein_coding	Gast
1773	ENSMUSG00000017167	3068.81	-0.0354706	0.0711643	0.498433	0.618179	0.936263	11	101061349	101081550	protein_coding	Cntnap1
1774	ENSMUSG00000017176	474.306	-0.176119	0.0914166	1.92656	0.0540348	0.606822	11	100313147	100332634	protein_coding	Nt5c3b
1775	ENSMUSG00000017188	621.576	-0.000324628	0.0957661	0.0033898	0.997295	0.999725	11	101168794	101169940	protein_coding	Coa3
1776	ENSMUSG00000017195	0	NA	NA	NA	NA	NA	11	98441923	98449491	protein_coding	Zpbp2
1777	ENSMUSG00000017204	3.89426	-1.02361	0.985232	1.03895	0.298826	NA	11	98555177	98568534	protein_coding	Gsdma
1778	ENSMUSG00000017210	1365.54	0.00400323	0.085069	-0.0470587	0.962466	0.994944	11	98595417	98620261	protein_coding	Med24
1779	ENSMUSG00000017211	0.254768	-15.5397	195.417	0.0795207	0.936618	NA	11	98537585	98548790	protein_coding	Gsdma2
1780	ENSMUSG00000017221	1545.18	-0.0389746	0.0659229	0.591215	0.554376	0.91809	11	98573380	98586805	protein_coding	Psmd3
1781	ENSMUSG00000017264	867.1	0.0621627	0.0762234	-0.815534	0.414767	0.885774	4	148642886	148666858	protein_coding	Exosc10
1782	ENSMUSG00000017286	735.702	0.0312349	0.0833155	-0.374899	0.707736	0.95311	11	76011813	76134551	protein_coding	Glod4
1783	ENSMUSG00000017288	915.841	-0.0152832	0.0872712	0.175123	0.860983	0.984112	11	75937052	76070473	protein_coding	Vps53
1784	ENSMUSG00000017291	2463.06	-0.226694	0.0678299	3.3421	0.000831463	0.111543	11	77419988	77498641	protein_coding	Taok1
1785	ENSMUSG00000017299	205.454	-0.116309	0.135532	0.858168	0.3908	0.881272	2	164587903	164610527	protein_coding	Dnttip1
1786	ENSMUSG00000017300	0	NA	NA	NA	NA	NA	2	164619081	164621887	protein_coding	Tnnc2
1787	ENSMUSG00000017307	169.654	-0.120004	0.144586	0.829981	0.406549	0.88333	2	164634685	164646802	protein_coding	Acot8
1788	ENSMUSG00000017309	0.883987	17.5849	264.713	-0.0664303	0.947035	NA	11	101932335	101946446	protein_coding	Cd300lg
1789	ENSMUSG00000017310	0	NA	NA	NA	NA	NA	2	164540421	164544373	protein_coding	Spint4
1790	ENSMUSG00000017311	0	NA	NA	NA	NA	NA	11	101997502	101998658	protein_coding	Pyy
1791	ENSMUSG00000017314	1926.66	0.0361156	0.0641491	-0.562994	0.573439	0.924522	11	101947841	101979341	protein_coding	Mpp2
1792	ENSMUSG00000017316	0	NA	NA	NA	NA	NA	11	101990756	101992145	protein_coding	Ppy
1793	ENSMUSG00000017344	374.816	-0.0076916	0.138676	0.0554646	0.955768	0.99492	11	78389917	78393150	protein_coding	Vtn
1794	ENSMUSG00000017376	477.121	-0.089001	0.0905226	0.98319	0.325514	0.863892	11	78457994	78588199	protein_coding	Nlk
1795	ENSMUSG00000017386	208.328	0.0745113	0.130938	-0.569058	0.569317	0.922375	11	78049325	78056415	protein_coding	Traf4
1796	ENSMUSG00000017390	13260.3	0.115034	0.0804681	-1.42956	0.152845	0.770966	11	78213794	78218607	protein_coding	Aldoc
1797	ENSMUSG00000017400	279.856	-0.017546	0.171167	0.102508	0.918354	0.989796	11	97927449	97944288	protein_coding	Stac2
1798	ENSMUSG00000017404	2511.23	0.240889	0.0800486	-3.00929	0.00261859	0.199798	11	97917536	97921318	protein_coding	Rpl19
1799	ENSMUSG00000017405	77.8274	0.17641	0.265587	-0.664227	0.506545	0.906945	11	78056932	78067501	protein_coding	Nek8
1800	ENSMUSG00000017412	977.128	-0.288805	0.0797646	3.62072	0.000293788	0.0824076	2	52318337	52566843	protein_coding	Cacnb4
1801	ENSMUSG00000017417	478.511	-0.110282	0.15419	0.715238	0.474462	0.901527	11	97814064	97877270	protein_coding	Plxdc1
1802	ENSMUSG00000017418	301.991	-0.105368	0.110659	0.95219	0.341001	0.870226	2	15054206	15087267	protein_coding	Arl5b
1803	ENSMUSG00000017421	1922.76	-0.124906	0.0685107	1.82316	0.0682789	0.640348	11	80274105	80296559	protein_coding	Zfp207
1804	ENSMUSG00000017428	1102.22	0.00344542	0.07231	-0.047648	0.961997	0.994944	11	80319441	80364074	protein_coding	Psmd11
1805	ENSMUSG00000017446	34.3254	0.131105	0.349442	-0.375183	0.707525	NA	11	118319029	118340789	protein_coding	C1qtnf1
1806	ENSMUSG00000017453	103.465	-0.375033	0.208944	1.7949	0.07267	0.657056	11	77771441	77784922	protein_coding	Pipox
1807	ENSMUSG00000017466	9614.44	0.0307269	0.0945387	-0.325019	0.745166	0.965603	11	118191887	118246566	protein_coding	Timp2
1808	ENSMUSG00000017478	669.456	0.000448477	0.0886013	-0.00506175	0.995961	0.999367	8	123103348	123144099	protein_coding	Zc3h18
1809	ENSMUSG00000017485	1592.39	-0.0928813	0.0676257	1.37346	0.169609	0.780037	14	6034301	6104584	protein_coding	Top2b
1810	ENSMUSG00000017491	24.4403	-0.129839	0.375204	0.346049	0.729306	NA	14	5650540	6038924	protein_coding	Rarb
1811	ENSMUSG00000017493	86.9774	0.127361	0.25456	-0.500318	0.616851	0.93574	11	98932070	98945218	protein_coding	Igfbp4
1812	ENSMUSG00000017499	4.97629	-0.366234	0.748217	0.489476	0.624505	NA	11	98798627	98814766	protein_coding	Cdc6
1813	ENSMUSG00000017548	679.933	-0.159027	0.0826049	1.92515	0.0542105	0.60693	11	79883932	79924949	protein_coding	Suz12
1814	ENSMUSG00000017550	134.251	0.0289202	0.159125	-0.181745	0.855783	0.984112	11	79980226	80026620	protein_coding	Atad5
1815	ENSMUSG00000017561	217.423	0.102608	0.139255	-0.736836	0.461222	0.899132	11	79937319	79971817	protein_coding	Crlf3
1816	ENSMUSG00000017588	1.11697	1.62432	1.49108	-1.08936	0.275996	NA	11	99236391	99241930	protein_coding	Krt27
1817	ENSMUSG00000017607	2.10807	0.0877922	1.26002	-0.0696753	0.944452	NA	11	98956504	98980132	protein_coding	Tns4
1818	ENSMUSG00000017615	746.119	0.0754496	0.0965104	-0.781777	0.434345	0.888606	11	78413676	78427158	protein_coding	Tnfaip1
1819	ENSMUSG00000017631	7807.55	-0.0230338	0.0669804	0.343888	0.730931	0.962012	11	76307560	76514384	protein_coding	Abr
1820	ENSMUSG00000017639	4105.83	-0.0262944	0.0572308	0.459445	0.645915	0.94008	11	79482038	79588849	protein_coding	Rab11fip4
1821	ENSMUSG00000017652	10.6497	-0.165765	0.493178	0.336116	0.736783	NA	2	164897547	164914868	protein_coding	Cd40
1822	ENSMUSG00000017664	649.178	0.171302	0.0928797	-1.84434	0.0651337	0.635482	2	165118474	165129789	protein_coding	Slc35c2
1823	ENSMUSG00000017667	875.211	-0.0128591	0.0979386	0.131298	0.89554	0.987047	2	165216184	165230179	protein_coding	Zfp334
1824	ENSMUSG00000017670	1779.44	-0.0341263	0.0658454	0.518279	0.604264	0.931689	2	165129951	165168399	protein_coding	Elmo2
1825	ENSMUSG00000017677	2600.67	-0.0436013	0.0628491	0.693746	0.487842	0.903054	11	79130198	79145497	protein_coding	Wsb1
1826	ENSMUSG00000017679	699.049	-0.122264	0.0902327	1.35498	0.175423	0.784702	2	163444234	163460933	protein_coding	Ttpal
1827	ENSMUSG00000017686	795.19	-0.0781965	0.0766046	1.02078	0.307358	0.863274	11	80099845	80158733	protein_coding	Rhot1
1828	ENSMUSG00000017688	2.05879	2.1064	1.32435	-1.59051	0.111719	NA	3	3573084	3724860	protein_coding	Hnf4g
1829	ENSMUSG00000017692	289.008	-0.0609521	0.132595	0.459687	0.645741	0.94008	11	80191738	80246781	protein_coding	Rhbdl3
1830	ENSMUSG00000017697	19.1793	-0.140962	0.39019	0.361265	0.717902	NA	2	163568504	163592159	protein_coding	Ada
1831	ENSMUSG00000017707	2786.97	0.0918897	0.0676837	-1.35763	0.17458	0.783963	2	163465192	163487051	protein_coding	Serinc3
1832	ENSMUSG00000017713	57.3891	0.055026	0.262745	-0.209427	0.834115	NA	11	117758778	117764307	protein_coding	Tha1
1833	ENSMUSG00000017715	639.354	0.0408183	0.0821449	-0.496906	0.619255	0.936687	11	117877118	117914837	protein_coding	Pgs1
1834	ENSMUSG00000017716	32.3556	-0.490321	0.335879	1.45982	0.144341	NA	11	117740077	117746569	protein_coding	Birc5
1835	ENSMUSG00000017718	56.7866	-0.0315498	0.242504	0.1301	0.896487	NA	11	117716750	117730734	protein_coding	Afmid
1836	ENSMUSG00000017720	5.10556	0.294493	0.721279	-0.408292	0.683059	NA	2	164312221	164315644	protein_coding	Trp53tg5
1837	ENSMUSG00000017721	1884.81	0.0403123	0.0618961	-0.651289	0.51486	0.907651	2	164339440	164350221	protein_coding	Pigt
1838	ENSMUSG00000017723	0.930022	0.208257	1.56353	-0.133197	0.894038	NA	2	164404333	164410430	protein_coding	Wfdc2
1839	ENSMUSG00000017724	84.137	-0.0931598	0.208843	0.446075	0.655543	0.942039	11	101660568	101676197	protein_coding	Etv4
1840	ENSMUSG00000017733	0.245262	16.219	273.886	-0.0592183	0.952778	NA	2	164430263	164435514	protein_coding	Eppin
1841	ENSMUSG00000017734	711.225	0.0435163	0.106189	-0.4098	0.681953	0.947464	2	164328026	164335239	protein_coding	Dbndd2
1842	ENSMUSG00000017737	45.4653	0.142315	0.290979	-0.489089	0.624779	NA	2	164782700	164797770	protein_coding	Mmp9
1843	ENSMUSG00000017740	8510.14	-0.0194545	0.0713688	0.272592	0.785167	0.970529	2	164802722	164841651	protein_coding	Slc12a5
1844	ENSMUSG00000017747	153.967	-0.0156345	0.16965	0.0921572	0.926573	0.992147	11	100656858	100661783	protein_coding	Ghdc
1845	ENSMUSG00000017754	910.976	0.400196	0.36938	-1.08343	0.278619	0.851223	2	164681438	164699631	protein_coding	Pltp
1846	ENSMUSG00000017756	414.425	0.0887906	0.310045	-0.286379	0.774588	0.970346	13	73881213	73964873	protein_coding	Slc12a7
1847	ENSMUSG00000017760	1151.41	0.015436	0.0724877	-0.212946	0.831369	0.981972	2	164674793	164682952	protein_coding	Ctsa
1848	ENSMUSG00000017764	429.675	0.11415	0.107785	-1.05905	0.289577	0.854981	2	164664606	164668791	protein_coding	Zswim1
1849	ENSMUSG00000017765	301.163	0.200692	0.155974	-1.2867	0.198198	0.804862	8	106670222	106692729	protein_coding	Slc12a4
1850	ENSMUSG00000017767	1.07377	-0.0384277	1.36352	0.0281826	0.977516	NA	2	164668309	164670457	protein_coding	Spata25
1851	ENSMUSG00000017774	344.833	0.214533	0.136384	-1.57301	0.115717	0.719159	11	75541330	75564736	protein_coding	Myo1c
1852	ENSMUSG00000017776	1554.88	-0.0137689	0.070951	0.194063	0.846127	0.984112	11	75570085	75597734	protein_coding	Crk
1853	ENSMUSG00000017778	877.49	0.22027	0.0784285	-2.80855	0.00497658	0.272982	13	86192935	86195023	protein_coding	Cox7c
1854	ENSMUSG00000017781	3550.67	0.0535645	0.0646966	-0.827934	0.407708	0.883461	11	75478923	75519630	protein_coding	Pitpna
1855	ENSMUSG00000017801	302.094	0.0386612	0.112556	-0.343484	0.731234	0.962012	11	100978103	100983033	protein_coding	Mlx
1856	ENSMUSG00000017802	833.948	0.0151046	0.090775	-0.166396	0.867846	0.984232	11	100987148	101010719	protein_coding	Retreg3
1857	ENSMUSG00000017817	60.4594	-0.202894	0.236745	0.857013	0.391438	NA	2	163178162	163239913	protein_coding	Jph2
1858	ENSMUSG00000017830	16.4092	1.61023	0.432633	-3.72192	0.000197712	NA	11	100585710	100595097	protein_coding	Dhx58
1859	ENSMUSG00000017831	1138.37	0.0145329	0.0789022	-0.184189	0.853865	0.984112	17	53786262	53814708	protein_coding	Rab5a
1860	ENSMUSG00000017832	0.604677	0.458888	1.51133	-0.303632	0.761408	NA	11	100604676	100605401	protein_coding	Hspb9
1861	ENSMUSG00000017837	123.022	-0.0410733	0.173156	0.237204	0.812499	0.978123	11	100510070	100518433	protein_coding	Nkiras2
1862	ENSMUSG00000017843	2244.56	-0.0843808	0.0626125	1.34767	0.177766	0.787558	12	110413554	110549496	protein_coding	Ppp2r5c
1863	ENSMUSG00000017858	616.086	0.100605	0.0826972	-1.21655	0.223777	0.820603	2	162859274	162888061	protein_coding	Ift52
1864	ENSMUSG00000017861	27.9194	0.143891	0.394675	-0.364582	0.715424	NA	2	162896607	162926608	protein_coding	Mybl2
1865	ENSMUSG00000017868	29.7328	-0.0417463	0.312412	0.133626	0.893699	NA	2	162829250	162856047	protein_coding	Sgk2
1866	ENSMUSG00000017897	21.9132	-0.0511572	0.386008	0.132529	0.894566	NA	2	165436952	165613647	protein_coding	Eya2
1867	ENSMUSG00000017922	0	NA	NA	NA	NA	NA	13	27380642	27387732	protein_coding	Prl3c1
1868	ENSMUSG00000017929	791.029	-0.109034	0.0855712	1.27419	0.202597	0.805358	2	167140364	167191103	protein_coding	B4galt5
1869	ENSMUSG00000017943	1108.37	0.0363397	0.0777173	-0.467589	0.640079	0.938579	2	163280396	163297244	protein_coding	Gdap1l1
1870	ENSMUSG00000017950	0.438338	-1.04383	1.88239	0.554524	0.57922	NA	2	163348728	163414830	protein_coding	Hnf4a
1871	ENSMUSG00000017969	24.5605	0.1869	0.413544	-0.451947	0.651307	NA	2	167033725	167082524	protein_coding	Ptgis
1872	ENSMUSG00000017978	2076.27	0.0609673	0.0791088	-0.770676	0.440899	0.889451	6	23262772	23839420	protein_coding	Cadps2
1873	ENSMUSG00000017999	431.076	-0.0292368	0.111675	0.261802	0.793474	0.972879	2	166857113	166876867	protein_coding	Ddx27
1874	ENSMUSG00000018001	478.009	0.092335	0.109102	-0.846318	0.397376	0.882952	5	143608202	143696005	protein_coding	Cyth3
1875	ENSMUSG00000018008	128.074	0.109051	0.16583	-0.657609	0.510789	0.907205	15	78481247	78506219	protein_coding	Cyth4
1876	ENSMUSG00000018012	419.614	-0.125958	0.104179	1.20905	0.226643	0.820907	11	120612296	120614795	protein_coding	Rac3
1877	ENSMUSG00000018040	1068.07	0.107262	0.0695503	-1.54223	0.123018	0.734138	15	82997634	83007002	protein_coding	Rrp7a
1878	ENSMUSG00000018042	1416.78	0.175015	0.0702489	-2.49135	0.0127259	0.395624	15	83037695	83056793	protein_coding	Cyb5r3
1879	ENSMUSG00000018068	487.586	-0.0304393	0.0898106	0.338928	0.734664	0.962012	11	86101507	86148401	protein_coding	Ints2
1880	ENSMUSG00000018076	1212.8	-0.107697	0.0675601	1.59409	0.110916	0.716464	5	118698744	118903503	protein_coding	Med13l
1881	ENSMUSG00000018102	205.541	0.0159971	0.133587	-0.119751	0.904681	0.987055	13	23868182	23876891	protein_coding	H2bc4
1882	ENSMUSG00000018126	8.75985	-0.0538334	0.606475	0.0887644	0.929269	NA	15	79142395	79169737	protein_coding	Baiap2l2
1883	ENSMUSG00000018143	195.743	-0.110125	0.154707	0.711829	0.47657	0.901527	5	139777268	139788408	protein_coding	Mafk
1884	ENSMUSG00000018160	880.774	-0.0846288	0.0770285	1.09867	0.271912	0.848175	11	98042980	98084119	protein_coding	Med1
1885	ENSMUSG00000018166	205.648	-0.314942	0.157021	2.00574	0.0448845	0.570628	10	128403392	128425521	protein_coding	Erbb3
1886	ENSMUSG00000018167	250.417	-0.0390685	0.125458	0.311407	0.755491	0.96777	11	98249194	98271938	protein_coding	Stard3
1887	ENSMUSG00000018168	1.64827	0.0796072	1.39001	-0.0572711	0.954329	NA	11	98355728	98436857	protein_coding	Ikzf3
1888	ENSMUSG00000018169	89.9151	0.301862	0.273583	-1.10336	0.269869	0.847513	15	78640082	78657675	protein_coding	Mfng
1889	ENSMUSG00000018171	877.412	0.0722958	0.0801292	-0.90224	0.366929	0.876685	11	86474691	86574662	protein_coding	Vmp1
1890	ENSMUSG00000018189	354.286	0.035184	0.103245	-0.340781	0.733268	0.962012	1	143653010	143683204	protein_coding	Uchl5
1891	ENSMUSG00000018196	859.738	-0.127566	0.0727102	1.75444	0.0793551	0.671628	1	143592076	143625414	protein_coding	Glrx2
1892	ENSMUSG00000018199	1224.6	-0.106699	0.0838528	1.27246	0.203209	0.805915	1	143626528	143652806	protein_coding	Ro60
1893	ENSMUSG00000018209	590.298	-0.0141884	0.0889813	0.159454	0.873311	0.984427	2	163912242	163997444	protein_coding	Stk4
1894	ENSMUSG00000018211	0.114134	-14.5802	197.814	0.0737068	0.941244	NA	2	164056374	164063580	protein_coding	Wfdc15b
1895	ENSMUSG00000018217	236.796	0.12534	0.162263	-0.772447	0.43985	0.888919	11	63019808	63050373	protein_coding	Pmp22
1896	ENSMUSG00000018238	7.31602	0.113806	0.658279	-0.172885	0.862742	NA	11	53321850	53328731	protein_coding	Gdf9
1897	ENSMUSG00000018239	92.8376	0.104779	0.201674	-0.519547	0.603379	0.931689	11	53215506	53224128	protein_coding	Zcchc10
1898	ENSMUSG00000018259	0	NA	NA	NA	NA	NA	13	27529656	27538199	protein_coding	Prl8a2
1899	ENSMUSG00000018263	0.254273	-0.141801	2.1424	0.066188	0.947228	NA	5	119970733	120023284	protein_coding	Tbx5
1900	ENSMUSG00000018286	1311.91	0.196863	0.084327	-2.33452	0.0195683	0.440301	11	70416193	70418684	protein_coding	Psmb6
1901	ENSMUSG00000018287	688.772	0.0576712	0.0853689	-0.675552	0.499325	0.905653	11	70554597	70560242	protein_coding	Spag7
1902	ENSMUSG00000018293	921.596	0.0232259	0.0788691	-0.294486	0.768386	0.970346	11	70542676	70545470	protein_coding	Pfn1
1903	ENSMUSG00000018322	952.61	0.102037	0.0709616	-1.43792	0.150458	0.769082	2	163895460	163913089	protein_coding	Tomm34
1904	ENSMUSG00000018326	8053.17	0.0233914	0.0685033	-0.341464	0.732755	0.962012	2	163836880	163860508	protein_coding	Ywhab
1905	ENSMUSG00000018334	438.256	-0.0881616	0.116544	0.756463	0.449371	0.89238	11	78904266	79037233	protein_coding	Ksr1
1906	ENSMUSG00000018339	2345.9	-0.0405861	0.21396	0.189691	0.849552	0.984112	11	54793279	54801203	protein_coding	Gpx3
1907	ENSMUSG00000018340	963.196	0.0358434	0.070082	-0.511449	0.609037	0.932579	11	54869934	54924271	protein_coding	Anxa6
1908	ENSMUSG00000018341	3.08264	-0.641827	1.02353	0.627075	0.53061	NA	6	67268302	67353172	protein_coding	Il12rb2
1909	ENSMUSG00000018347	150.765	-0.0668869	0.161431	0.414337	0.678627	0.946644	11	65698001	65720065	protein_coding	Zkscan6
1910	ENSMUSG00000018362	334.237	0.108997	0.133074	-0.819068	0.412748	0.885774	11	106879455	106890367	protein_coding	Kpna2
1911	ENSMUSG00000018363	605.587	-0.016819	0.0829347	0.202798	0.839293	0.98342	11	106710892	106811541	protein_coding	Smurf2
1912	ENSMUSG00000018372	199.456	-0.355561	0.155617	2.28485	0.0223217	0.457631	11	106680078	106710756	protein_coding	Cep95
1913	ENSMUSG00000018377	955.033	-0.0070671	0.0730726	0.0967134	0.922954	0.991297	11	87959105	87975555	protein_coding	Vezf1
1914	ENSMUSG00000018378	1181.17	-0.108151	0.0986898	1.09586	0.273138	0.848175	11	87988884	88084966	protein_coding	Cuedc1
1915	ENSMUSG00000018379	2845.11	-0.0698547	0.0585527	1.19302	0.23286	0.826076	11	87938199	87944581	protein_coding	Srsf1
1916	ENSMUSG00000018381	10.0859	0.355791	0.50276	-0.707675	0.479147	NA	11	95720900	95733302	protein_coding	Abi3
1917	ENSMUSG00000018387	64.3549	0.207352	0.238781	-0.868379	0.385187	NA	11	53348032	53358593	protein_coding	Shroom1
1918	ENSMUSG00000018395	2682.95	0.000611269	0.0603082	-0.0101358	0.991913	0.998534	11	53458206	53492794	protein_coding	Kif3a
1919	ENSMUSG00000018398	2984.62	-0.0502877	0.059113	0.850704	0.394934	0.882692	11	53410084	53440392	protein_coding	Septin8
1920	ENSMUSG00000018401	1720.3	-0.144425	0.0751675	1.92137	0.0546846	0.60693	11	87482988	87507128	protein_coding	Mtmr4
1921	ENSMUSG00000018405	108.138	-0.0239464	0.17711	0.135206	0.892449	0.986392	11	84703887	84710341	protein_coding	Mrm1
1922	ENSMUSG00000018411	9407.63	-0.0244181	0.0573494	0.425778	0.670269	0.945202	11	104122216	104222916	protein_coding	Mapt
1923	ENSMUSG00000018412	1443.03	-0.0856772	0.0680805	1.25847	0.208222	0.808866	11	104224055	104359687	protein_coding	Kansl1
1924	ENSMUSG00000018415	609.621	-0.0313107	0.100407	0.311837	0.755165	0.96777	11	60307971	60341753	protein_coding	Gid4
1925	ENSMUSG00000018417	215.06	-0.125324	0.142545	0.87919	0.379298	0.879147	1	51788924	51955230	protein_coding	Myo1b
1926	ENSMUSG00000018425	483.357	-0.202519	0.0955855	2.11872	0.0341145	0.517044	11	86659672	86698572	protein_coding	Dhx40
1927	ENSMUSG00000018427	464.529	-0.203754	0.0943531	2.15948	0.0308129	0.502368	11	86827251	86884533	protein_coding	Ypel2
1928	ENSMUSG00000018428	586.556	0.0214079	0.0866449	-0.247077	0.804849	0.976871	11	88721618	88755412	protein_coding	Akap1
1929	ENSMUSG00000018433	421.072	0.0369869	0.110103	-0.335931	0.736923	0.96202	11	107057489	107080207	protein_coding	Nol11
1930	ENSMUSG00000018442	422.578	-0.0500172	0.0998708	0.500819	0.616498	0.935434	11	70897990	70910667	protein_coding	Derl2
1931	ENSMUSG00000018446	601.534	0.0391146	0.129104	-0.30297	0.761912	0.969471	11	70868662	70873852	protein_coding	C1qbp
1932	ENSMUSG00000018449	146.906	-0.0579851	0.171334	0.338434	0.735036	0.962012	11	70861039	70868659	protein_coding	Rpain
1933	ENSMUSG00000018451	7210.86	0.00407473	0.0892324	-0.0456642	0.963578	0.995238	11	70922767	70924339	protein_coding	6330403K07Rik
1934	ENSMUSG00000018459	184.271	-0.0833418	0.186403	0.447107	0.654798	0.942039	2	165246948	165315150	protein_coding	Slc13a3
1935	ENSMUSG00000018470	107.559	0.0751016	0.270443	-0.277699	0.781244	0.970457	11	69217084	69223868	protein_coding	Kcnab3
1936	ENSMUSG00000018474	10220.8	0.0416614	0.0597203	-0.697609	0.485422	0.902651	11	69234099	69260232	protein_coding	Chd3
1937	ENSMUSG00000018476	806.192	-0.052217	0.0935792	0.557998	0.576845	0.924794	11	69289334	69304501	protein_coding	Kdm6b
1938	ENSMUSG00000018479	1.83774	-0.307246	1.28179	0.2397	0.810562	NA	11	85061230	85071971	protein_coding	Chct1
1939	ENSMUSG00000018481	1952.36	-0.0572944	0.0651114	0.879945	0.378889	0.879147	11	85078088	85125956	protein_coding	Appbp2
1940	ENSMUSG00000018486	2.23187	-0.156977	1.05321	0.149047	0.881516	NA	11	103618190	103640647	protein_coding	Wnt9b
1941	ENSMUSG00000018500	68.6885	-0.183846	0.254932	0.721159	0.470812	0.901076	11	62139810	62157279	protein_coding	Adora2b
1942	ENSMUSG00000018501	3180.75	-0.134313	0.0652721	2.05774	0.0396147	0.541006	11	62207252	62349367	protein_coding	Ncor1
1943	ENSMUSG00000018507	469.209	-0.0179271	0.0910107	0.196978	0.843845	0.984112	11	62465312	62491341	protein_coding	Trpv2
1944	ENSMUSG00000018509	223.266	0.00916597	0.132352	-0.0692544	0.944787	0.993119	11	62415772	62430087	protein_coding	Cenpv
1945	ENSMUSG00000018537	703.228	-0.0177574	0.121333	0.146352	0.883643	0.985089	11	97579649	97591323	protein_coding	Pcgf2
1946	ENSMUSG00000018541	234.005	0.166372	0.129906	-1.28071	0.200296	0.805358	11	97636307	97657382	protein_coding	Cwc25
1947	ENSMUSG00000018543	3.54965	-1.0287	0.882043	1.16627	0.243506	NA	11	97662307	97666744	protein_coding	Spmap1
1948	ENSMUSG00000018547	2367.77	0.0479964	0.0678133	-0.707772	0.479087	0.901767	11	97605983	97635530	protein_coding	Pip4k2b
1949	ENSMUSG00000018548	3027.7	-0.0253253	0.0672879	0.376373	0.70664	0.952893	11	87017903	87111509	protein_coding	Trim37
1950	ENSMUSG00000018554	35.5826	-0.296444	0.28868	1.02689	0.30447	NA	11	69826622	69832431	protein_coding	Ybx2
1951	ENSMUSG00000018559	526.344	-0.0506264	0.0872492	0.580251	0.561746	0.92114	11	69871982	69881427	protein_coding	Ctdnep1
1952	ENSMUSG00000018565	585.583	0.0695244	0.096437	-0.720931	0.470952	0.901076	11	69859048	69873343	protein_coding	Elp5
1953	ENSMUSG00000018566	41.5919	0.70318	0.303466	-2.31716	0.0204951	NA	11	69833365	69839014	protein_coding	Slc2a4
1954	ENSMUSG00000018567	1766.59	0.047602	0.0739839	-0.64341	0.519958	0.908825	11	69881969	69885777	protein_coding	Gabarap
1955	ENSMUSG00000018569	3.38392	0.898185	0.95734	-0.938209	0.348137	NA	11	69855605	69858711	protein_coding	Cldn7
1956	ENSMUSG00000018570	12.5	-0.844689	0.502204	1.68196	0.0925757	NA	11	69788178	69791813	protein_coding	2810408A11Rik
1957	ENSMUSG00000018572	527.728	0.0772565	0.0890425	-0.867636	0.385593	0.879539	11	69886603	69890835	protein_coding	Phf23
1958	ENSMUSG00000018574	404.748	0.0886248	0.105978	-0.83626	0.403009	0.88333	11	69901009	69906237	protein_coding	Acadvl
1959	ENSMUSG00000018581	208.811	0.374023	0.529302	-0.706634	0.479794	0.901806	12	117841717	118162778	protein_coding	Dnah11
1960	ENSMUSG00000018583	1495.56	0.010507	0.06466	-0.162496	0.870915	0.984427	11	55360511	55395664	protein_coding	G3bp1
1961	ENSMUSG00000018585	204.381	0.252253	0.142505	-1.77013	0.0767049	0.668586	11	55337467	55352065	protein_coding	Atox1
1962	ENSMUSG00000018589	700.219	-0.107881	0.111583	0.966821	0.333634	0.868246	X	163912013	164110389	protein_coding	Glra2
1963	ENSMUSG00000018593	24604.4	0.076955	0.0674357	-1.14116	0.253803	0.840931	11	55285326	55314009	protein_coding	Sparc
1964	ENSMUSG00000018595	35.2082	-0.0683215	0.317838	0.214957	0.829801	NA	X	135658423	135680890	protein_coding	Glra4
1965	ENSMUSG00000018599	283.941	-0.0763605	0.11667	0.654502	0.512788	0.907205	11	60619224	60623777	protein_coding	Mief2
1966	ENSMUSG00000018604	33.5751	-2.32495	0.894926	2.59792	0.009379	NA	5	119808734	119822789	protein_coding	Tbx3
1967	ENSMUSG00000018620	0	NA	NA	NA	NA	NA	9	7628232	7674980	protein_coding	Mmp20
1968	ENSMUSG00000018623	0	NA	NA	NA	NA	NA	9	7692091	7699587	protein_coding	Mmp7
1969	ENSMUSG00000018634	80.7165	0.159381	0.205709	-0.774788	0.438465	0.888919	11	104023681	104066349	protein_coding	Crhr1
1970	ENSMUSG00000018648	169.849	0.351457	0.142107	-2.47318	0.0133917	0.399	11	83938867	83960087	protein_coding	Dusp14
1971	ENSMUSG00000018651	409.582	-0.0267886	0.105383	0.254202	0.799339	0.974173	11	83969746	84020426	protein_coding	Tada2a
1972	ENSMUSG00000018654	44.9019	-0.121858	0.263466	0.462521	0.643708	NA	11	11634980	11722926	protein_coding	Ikzf1
1973	ENSMUSG00000018656	0.482541	-1.68433	1.81078	0.930172	0.352282	NA	6	42561800	42574626	protein_coding	Tcaf3
1974	ENSMUSG00000018659	718.902	0.0806141	0.107221	-0.751849	0.452142	0.894125	11	96828651	96834812	protein_coding	Pnpo
1975	ENSMUSG00000018661	732.49	0.0204296	0.0764507	-0.267226	0.789296	0.971525	11	113539995	113557880	protein_coding	Cog1
1976	ENSMUSG00000018666	417.334	-0.0729454	0.0993404	0.734297	0.462768	0.899505	11	96679953	96699466	protein_coding	Cbx1
1977	ENSMUSG00000018669	477.559	0.0933031	0.094564	-0.986666	0.323806	0.863892	11	96798252	96807322	protein_coding	Cdk5rap3
1978	ENSMUSG00000018672	36.6264	0.668359	0.339189	-1.97046	0.0487855	NA	11	96740696	96752029	protein_coding	Copz2
1979	ENSMUSG00000018677	1415.35	0.0389138	0.0674512	-0.576917	0.563995	0.921144	11	102293811	102298772	protein_coding	Slc25a39
1980	ENSMUSG00000018678	296.486	0.219127	0.117819	-1.85986	0.0629056	0.633987	11	96844167	96873785	protein_coding	Sp2
1981	ENSMUSG00000018697	216.736	0.272897	0.146188	-1.86675	0.0619366	0.631232	11	84313681	84404348	protein_coding	Aatf
1982	ENSMUSG00000018698	468.793	-0.157807	0.32794	0.481205	0.630371	0.938178	11	84409110	84416361	protein_coding	Lhx1
1983	ENSMUSG00000018707	13922.9	-0.0376633	0.0568204	0.662848	0.507428	0.906945	12	110567886	110633379	protein_coding	Dync1h1
1984	ENSMUSG00000018727	65.7612	0.119513	0.289629	-0.412643	0.679869	NA	11	113588998	113600843	protein_coding	Cpsf4l
1985	ENSMUSG00000018733	184.413	0.0867469	0.16216	-0.534947	0.592687	0.927818	11	83185468	83193412	protein_coding	Pex12
1986	ENSMUSG00000018736	1130.11	0.126915	0.0784096	-1.61861	0.105531	0.708832	11	68712260	68762684	protein_coding	Ndel1
1987	ENSMUSG00000018740	54.2307	0.0550969	0.253359	-0.217466	0.827845	NA	11	68858957	68865191	protein_coding	Slc25a35
1988	ENSMUSG00000018750	2469.19	-0.00796057	0.0592607	0.134331	0.893141	0.986499	11	69656738	69674849	protein_coding	Zbtb4
1989	ENSMUSG00000018752	3.7497	0.11401	0.905767	-0.125872	0.899834	NA	11	69573403	69586924	protein_coding	Tnfsfm13
1990	ENSMUSG00000018761	425.04	0.190444	0.0941772	-2.02219	0.0431571	0.56011	11	69547523	69553468	protein_coding	Mpdu1
1991	ENSMUSG00000018765	2153.53	0.0412771	0.0687321	-0.60055	0.548139	0.915321	11	69523816	69544123	protein_coding	Fxr2
1992	ENSMUSG00000018770	2156.24	0.0626668	0.0862135	-0.726879	0.4673	0.901076	2	73738791	73741670	protein_coding	Atp5mc3
1993	ENSMUSG00000018774	76.8715	0.158781	0.224057	-0.708665	0.478533	0.901548	11	69555039	69556979	protein_coding	Cd68
1994	ENSMUSG00000018776	18.4086	0.281433	0.50715	-0.55493	0.578943	NA	11	69650716	69652794	protein_coding	Slc35g3
1995	ENSMUSG00000018796	653.886	0.070946	0.0802084	-0.88452	0.376416	0.877912	8	46924074	46989088	protein_coding	Acsl1
1996	ENSMUSG00000018800	1168.92	-0.0730219	0.081855	0.892089	0.372345	0.877628	11	110160195	110228542	protein_coding	Abca5
1997	ENSMUSG00000018809	197.579	0.132343	0.134451	-0.984321	0.324958	0.863892	11	75239259	75296531	protein_coding	Smyd4
1998	ENSMUSG00000018819	68.1852	0.350242	0.231058	-1.51582	0.129566	0.746393	7	142014546	142048604	protein_coding	Lsp1
1999	ENSMUSG00000018820	1311.79	0.0743961	0.0721486	-1.03115	0.30247	0.860834	19	42152390	42183029	protein_coding	Zfyve27
[truncated: 49,791 more rows]

## Sheet: SCN GO
	query	significant	p_value	term_size	query_size	intersection_size	precision	recall	term_id	source	term_name	effective_domain_size	source_order	parents	evidence_codes	intersection	gene_ratio
1	query_1	TRUE	2.33725e-06	46	19	9	0.473684	0.195652	CORUM:3047	CORUM	Parvulin-associated pre-rRNP complex	1082	332	CORUM:0000000	CORUM,CORUM,CORUM,CORUM,CORUM,CORUM,CORUM,CORUM,CORUM	Rpl19,Rpl14,Rps3a1,Rps3,Rpl4,Rpl18a,Rps8,Rpl18,Rpl26	0.196
2	query_1	TRUE	4.08632e-28	145	128	26	0.203125	0.17931	GO:0002181	GO:BP	cytoplasmic translation	21165	727	GO:0006412	NAS,NAS,NAS,NAS,NAS,NAS,NAS,NAS,NAS,NAS,NAS,ISS IBA NAS,ISS NAS,NAS,NAS,NAS,NAS,ISS NAS,NAS,IBA NAS,NAS,IBA NAS,NAS,NAS,IMP NAS,NAS	Rps9,Rps25,Rps5,Rpl19,Rps24,Rpl14,Rps3a1,Rps20,Rpl28,Rps3,Rpl4,Rps29,Rps21,Rpl37,Rpl18a,Rps8,Rpl30,Rpl18,Rpl11,Rpl26,Rps12,Rpl17,Rps15,Rpl23,Rpl39,Rpl41	0.179
3	query_1	TRUE	7.21191e-19	578	128	32	0.25	0.0553633	GO:0006412	GO:BP	translation	21165	2162	GO:0009059;GO:0010467;GO:0019538	NAS,NAS,IBA NAS,NAS IC,IMP ISS ISO IBA,ISO NAS,NAS,ISS NAS,NAS,ISS,NAS,NAS,NAS,ISS ISO IBA NAS,ISS IBA,ISS NAS,NAS,NAS,NAS,ISS,NAS,ISS NAS,IBA NAS,IBA NAS,IBA NAS,IBA NAS,NAS,ISS,IDA IMP,ISO NAS,IMP NAS,NAS	Rps9,Rps25,Rps5,Rpl19,Rack1,Rps24,Rpl14,Rps3a1,Rps20,Ago3,Rpl28,Rps3,Rpl4,Rps29,Eef1a1,Rps21,Rpl37,Rpl18a,Rps8,Tnrc6b,Rpl30,Rpl18,Rpl11,Rpl26,Rps12,Rpl17,Rps15,Ddrgk1,Tia1,Rpl23,Rpl39,Rpl41	0.055
4	query_1	TRUE	6.77749e-10	51	128	10	0.078125	0.196078	GO:0140236	GO:BP	translation at presynapse	21165	19452	GO:0140241	NAS,NAS,NAS,NAS,NAS,NAS,NAS,NAS,NAS,NAS	Rps5,Rps24,Rpl14,Rpl28,Rpl4,Rpl37,Rpl26,Rps12,Rpl17,Rpl23	0.196
5	query_1	TRUE	8.34863e-10	52	128	10	0.078125	0.192308	GO:0140242	GO:BP	translation at postsynapse	21165	19457	GO:0140241	NAS,NAS,NAS,NAS,NAS,NAS,NAS,NAS,NAS,NAS	Rps5,Rps24,Rpl14,Rpl28,Rpl4,Rpl37,Rpl26,Rps12,Rpl17,Rpl23	0.192
6	query_1	TRUE	8.34863e-10	52	128	10	0.078125	0.192308	GO:0140241	GO:BP	translation at synapse	21165	19456	GO:0006412	NAS,NAS,NAS,NAS,NAS,NAS,NAS,NAS,NAS,NAS	Rps5,Rps24,Rpl14,Rpl28,Rpl4,Rpl37,Rpl26,Rps12,Rpl17,Rpl23	0.192
7	query_1	TRUE	1.06223e-05	97	128	9	0.0703125	0.0927835	GO:0042274	GO:BP	ribosomal small subunit biogenesis	21165	9978	GO:0022613;GO:0042254	ISS IBA,ISO,ISS IBA,ISS,ISS,IBA,ISS IBA,ISS IBA,ISO IBA	Rps9,Rps25,Rps5,Rps24,Rps3a1,Rps21,Rps8,Rps12,Rps15	0.093
8	query_1	TRUE	2.99864e-05	342	128	14	0.109375	0.0409357	GO:0022613	GO:BP	ribonucleoprotein complex biogenesis	21165	6587	GO:0044085	IDA IBA,ISS IBA,ISO,ISS IBA,ISS IBA,ISS,IBA,ISS,ISS ISO IBA,IBA,ISS IBA,IBA,ISS IBA,ISO IBA	Celf2,Rps9,Rps25,Rps5,Nopchap1,Rps24,Rpl14,Rps3a1,Shq1,Rps21,Rps8,Rpl26,Rps12,Rps15	0.041
9	query_1	TRUE	5.72281e-05	250	128	12	0.09375	0.048	GO:0042254	GO:BP	ribosome biogenesis	21165	9967	GO:0022613	ISS IBA,ISO,ISS IBA,ISS,IBA,ISS,ISO,IBA,ISS IBA,IBA,ISS IBA,ISO IBA	Rps9,Rps25,Rps5,Rps24,Rpl14,Rps3a1,Shq1,Rps21,Rps8,Rpl26,Rps12,Rps15	0.048
10	query_1	TRUE	0.000191052	3312	128	44	0.34375	0.013285	GO:0019538	GO:BP	protein metabolic process	21165	5841	GO:0043170;GO:0044238	IMP IGI ISS ISO,NAS,NAS,IBA NAS,NAS IC,ISS,IMP ISS ISO IBA,ISO NAS,NAS,ISS NAS,NAS,IBA,ISS,IDA IBA,NAS,NAS,NAS,ISO,IGI ISS,ISS ISO IBA NAS,ISS IBA,ISS NAS,IBA,IMP,NAS,IBA,IBA,IBA,NAS,NAS,ISS,ISS IBA,NAS,ISS NAS,IMP IBA NAS,IBA NAS,IBA NAS,IBA NAS,NAS,ISS IBA,IDA IMP,ISO NAS,IMP NAS,NAS	Apoe,Rps9,Rps25,Rps5,Rpl19,Socs2,Rack1,Rps24,Rpl14,Rps3a1,Rps20,Psmb2,Ago3,Htra3,Rpl28,Rps3,Rpl4,Chmp2a,Atm,Rps29,Eef1a1,Rps21,Adam22,Tet2,Rpl37,Tbca,Uggt2,Hecw2,Rpl18a,Rps8,Tnrc6b,Usp34,Rpl30,Rpl18,Rpl11,Rpl26,Rps12,Rpl17,Rps15,Ddrgk1,Tia1,Rpl23,Rpl39,Rpl41	0.013
11	query_1	TRUE	0.00204948	92	128	7	0.0546875	0.076087	GO:0019226	GO:BP	transmission of nerve impulse	21165	5570	GO:0007154;GO:0050877	IMP,IMP,IDA,IMP,IMP,ISO IBA,IGI	Tnr,Cacnb4,Hcn1,Penk,Kcnq3,Scn3a,Ntrk3	0.076
12	query_1	TRUE	0.00876515	6585	128	64	0.5	0.00971906	GO:0009058	GO:BP	biosynthetic process	21165	3220	GO:0008152	IDA ISO IBA,IBA,IMP IGI ISS ISO,NAS,NAS,IBA NAS,NAS IC,IBA,IMP ISS ISO IBA,IMP IBA,IGI,IDA IMP ISO IBA NAS,ISO,IDA IMP IGI ISO IBA,IMP,IDA IMP IBA,ISO NAS,NAS,IMP IBA,NAS,ISS NAS,NAS,IMP ISS IBA,NAS,IBA,IMP NAS,ISO,ISS IBA,NAS,IMP ISS,ISS ISO IBA NAS,ISO,ISS IBA,ISS IBA NAS,IMP IBA,NAS,IBA,IBA,IDA ISS IBA,IDA IBA,NAS,IBA NAS,ISS IBA,IMP,IMP IGI IBA,ISS,NAS,ISS NAS,IBA NAS,IBA NAS,IBA NAS,IBA NAS,…	Celf2,Abhd3,Apoe,Rps9,Rps25,Rps5,Rpl19,Socs2,Rack1,Supt4a,Nf1,Fos,Amacr,Nr4a1,Cacna1h,Lcor,Rps24,Rpl14,Zdbf2,Ndufb5,Rps3a1,Rps20,Ago3,Rpl28,Smg1,Rps3,Pak3,Polr2c,Rpl4,Atm,Rps29,Shq1,Eef1a1,Rps21,Tet2,Rpl37,Tbca,Uggt2,Pura,Csrnp3,Rpl18a,Rps8,Tnrc6b,Kcnq3,Nsd2,Gstm1,Rpl30,Rpl18,Rpl11,Rpl26,Rps12,Rpl17,Rps15,Brwd3,mt-Atp6,Ddrgk1,Tia1,Rpl23,Zfp950,Sarnp,Rpl39,Ftx,Gm14399,Rpl41	0.01
13	query_1	TRUE	0.0171055	5396	128	55	0.429688	0.0101927	GO:0010467	GO:BP	gene expression	21165	4144	GO:0009059	IDA ISO IBA,IMP IGI,NAS,NAS,IBA NAS,NAS IC,IMP ISS ISO IBA,IMP IBA,IGI,IDA IMP ISO IBA NAS,IDA IMP IGI ISO IBA,IDA IMP IBA,ISO NAS,NAS,IMP IBA,ISS NAS,NAS,IMP ISS IBA,NAS,IBA,IMP NAS,ISS IBA,NAS,IMP ISS,ISS ISO IBA NAS,ISO,ISS IBA,ISS IBA NAS,IMP IBA,NAS,IBA,IDA ISS IBA,IDA IBA,NAS,IBA NAS,ISS IBA,IMP,IMP IGI IBA,NAS,ISS NAS,IBA NAS,IBA NAS,IBA NAS,IBA NAS,NAS,IBA,ISS,IDA IMP ISS,ISO NAS,IBA,IDA …	Celf2,Apoe,Rps9,Rps25,Rps5,Rpl19,Rack1,Supt4a,Nf1,Fos,Nr4a1,Lcor,Rps24,Rpl14,Zdbf2,Rps3a1,Rps20,Ago3,Rpl28,Smg1,Rps3,Polr2c,Rpl4,Atm,Rps29,Shq1,Eef1a1,Rps21,Tet2,Rpl37,Tbca,Pura,Csrnp3,Rpl18a,Rps8,Tnrc6b,Kcnq3,Nsd2,Rpl30,Rpl18,Rpl11,Rpl26,Rps12,Rpl17,Rps15,Brwd3,Ddrgk1,Tia1,Rpl23,Zfp950,Sarnp,Rpl39,Ftx,Gm14399,Rpl41	0.01
14	query_1	TRUE	0.0239108	5741	128	57	0.445312	0.00992858	GO:0009059	GO:BP	macromolecule biosynthetic process	21165	3221	GO:0009058;GO:0043170	IDA ISO IBA,IMP IGI ISS,NAS,NAS,IBA NAS,NAS IC,IMP ISS ISO IBA,IMP IBA,IGI,IDA IMP ISO IBA NAS,IDA IMP IGI ISO IBA,IDA IMP IBA,ISO NAS,NAS,IMP IBA,ISS NAS,NAS,IMP ISS IBA,NAS,IBA,IMP NAS,ISO,ISS IBA,NAS,IMP ISS,ISS ISO IBA NAS,ISO,ISS IBA,ISS IBA NAS,IMP IBA,NAS,IBA,IBA,IDA ISS IBA,IDA IBA,NAS,IBA NAS,ISS IBA,IMP,IMP IGI IBA,NAS,ISS NAS,IBA NAS,IBA NAS,IBA NAS,IBA NAS,NAS,IBA,ISS,IDA IMP ISS,ISO …	Celf2,Apoe,Rps9,Rps25,Rps5,Rpl19,Rack1,Supt4a,Nf1,Fos,Nr4a1,Lcor,Rps24,Rpl14,Zdbf2,Rps3a1,Rps20,Ago3,Rpl28,Smg1,Rps3,Pak3,Polr2c,Rpl4,Atm,Rps29,Shq1,Eef1a1,Rps21,Tet2,Rpl37,Tbca,Uggt2,Pura,Csrnp3,Rpl18a,Rps8,Tnrc6b,Kcnq3,Nsd2,Rpl30,Rpl18,Rpl11,Rpl26,Rps12,Rpl17,Rps15,Brwd3,Ddrgk1,Tia1,Rpl23,Zfp950,Sarnp,Rpl39,Ftx,Gm14399,Rpl41	0.01
15	query_1	TRUE	0.0313201	1262	128	21	0.164062	0.0166403	GO:0043933	GO:BP	protein-containing complex organization	21165	10766	GO:0016043	IBA,IDA IBA,IMP ISS,ISO,IBA,ISS,ISS IBA,ISS,ISS,IMP,IDA IBA,ISS,IMP,ISS,ISO,IGI,ISS IBA,IBA,IMP,ISO IBA,ISS	Pfdn5,Celf2,Apoe,Rps25,Rps5,Fmc1,Nopchap1,Rack1,Hcn1,Nr4a1,Cox7a2l,Ndufb5,Rps3,Pak3,Chmp2a,Mid1,Shq1,Tbca,Kcnq3,Rps15,Tmem223	0.017
16	query_1	TRUE	0.0467086	2647	128	33	0.257812	0.0124669	GO:0044085	GO:BP	cellular component biogenesis	21165	10811	GO:0071840	IBA,IDA IBA,ISS,ISS IBA,ISO,ISS IBA,ISS,ISS IBA,ISS,ISS,IMP,IDA IBA,ISS,IBA,ISS,ISS,IMP,ISS,IDA IMP,ISS,ISS ISO NAS,ISS ISO IBA,IBA,ISS,IBA,ISS IBA,IMP,IDA ISO,IBA,ISS IBA,ISO IBA,ISS,ISS	Pfdn5,Celf2,Apoe,Rps9,Rps25,Rps5,Fmc1,Nopchap1,Rack1,Hcn1,Nr4a1,Cox7a2l,Rps24,Rpl14,Ndufb5,Rps3a1,Rps3,Pak3,Dcx,Ciao2b,Chmp2a,Shq1,Rps21,Myo9a,Tbca,Rps8,Kcnq3,Ntrk3,Rpl26,Rps12,Rps15,Tia1,Tmem223	0.012
17	query_1	TRUE	5.76156e-33	103	127	26	0.204724	0.252427	GO:0022626	GO:CC	cytosolic ribosome	20820	833	GO:0005829;GO:0005840	IDA ISO IBA NAS,IDA ISO IBA NAS,IDA ISS ISO IBA NAS,IDA IPI ISO IBA,IDA ISO NAS,IDA IPI ISO IBA,IDA ISO NAS,IDA ISO IBA NAS,IDA IPI ISO IBA,IDA ISO IBA NAS,IDA IPI ISO IBA,IDA ISS ISO IBA NAS,IDA ISS ISO IBA NAS,IDA IPI ISO IBA,IDA IPI ISO IBA,IDA ISO IBA NAS,IDA IPI ISO IBA,IDA IPI ISS ISO IBA,IDA IPI ISO IBA,IDA IPI ISO IBA,ISO IBA NAS,IDA IPI ISO IBA,IDA ISO IBA NAS,IDA IPI ISO IBA,IDA IPI ISO…	Rps9,Rps25,Rps5,Rpl19,Rps24,Rpl14,Rps3a1,Rps20,Rpl28,Rps3,Rpl4,Rps29,Rps21,Rpl37,Rpl18a,Rps8,Rpl30,Rpl18,Rpl11,Rpl26,Rps12,Rpl17,Rps15,Rpl23,Rpl39,Rpl41	0.252
18	query_1	TRUE	2.3226e-27	185	127	27	0.212598	0.145946	GO:0044391	GO:CC	ribosomal subunit	20820	2038	GO:0005840;GO:1990904	IDA ISO IBA NAS,IDA ISO IBA NAS,IDA ISS ISO IBA NAS,IDA IPI ISO IBA,IDA ISO,IDA ISS ISO NAS,IDA IPI ISO IBA,IDA ISO NAS,IDA ISO IBA NAS,IDA IPI ISO IBA,IDA ISO IBA NAS,IDA IPI ISO IBA,IDA ISS ISO IBA NAS,IDA ISS ISO IBA NAS,IDA IPI ISO IBA,IDA IPI ISO IBA,IDA ISO IBA NAS,IDA IPI ISO IBA,IDA IPI ISS ISO IBA,IDA IPI ISO IBA,IDA IPI ISO IBA,ISO IBA NAS,IDA IPI ISO IBA,IDA ISO IBA NAS,IDA IPI ISO IBA…	Rps9,Rps25,Rps5,Rpl19,Rack1,Rps24,Rpl14,Rps3a1,Rps20,Rpl28,Rps3,Rpl4,Rps29,Rps21,Rpl37,Rpl18a,Rps8,Rpl30,Rpl18,Rpl11,Rpl26,Rps12,Rpl17,Rps15,Rpl23,Rpl39,Rpl41	0.146
19	query_1	TRUE	4.14544e-26	205	127	27	0.212598	0.131707	GO:0005840	GO:CC	ribosome	20820	376	GO:0043232	IDA ISO IBA NAS,IDA ISO IBA NAS,IDA ISS ISO IBA NAS,IDA IPI ISO IBA,IDA ISO,IDA ISS ISO NAS,IDA IPI ISO IBA NAS,IDA ISO NAS,IDA ISO IBA NAS,IDA IPI ISO IBA NAS,IDA ISO IBA NAS,IDA IPI ISO IBA NAS,IDA ISS ISO IBA NAS,IDA ISS ISO IBA NAS,IDA IPI ISO IBA NAS,IDA IPI ISO IBA,IDA ISO IBA NAS,IDA IPI ISO IBA NAS,IDA IPI ISS ISO IBA,IDA IPI ISO IBA,IDA IPI ISO IBA NAS,ISO IBA NAS,IDA IPI ISO IBA NAS,IDA…	Rps9,Rps25,Rps5,Rpl19,Rack1,Rps24,Rpl14,Rps3a1,Rps20,Rpl28,Rps3,Rpl4,Rps29,Rps21,Rpl37,Rpl18a,Rps8,Rpl30,Rpl18,Rpl11,Rpl26,Rps12,Rpl17,Rps15,Rpl23,Rpl39,Rpl41	0.132
20	query_1	TRUE	5.39865e-18	62	127	15	0.11811	0.241935	GO:0022625	GO:CC	cytosolic large ribosomal subunit	20820	832	GO:0015934;GO:0022626	IDA IPI ISO IBA,IDA IPI ISO IBA,IDA IPI ISO IBA,IDA IPI ISO IBA,IDA IPI ISO IBA,IDA IPI ISO IBA,IDA IPI ISO IBA,IDA IPI ISS ISO IBA,IDA IPI ISO IBA,IDA IPI ISO IBA,ISO,IDA IPI ISO IBA,IDA IPI ISO IBA,IDA IPI ISO IBA,IDA IPI	Rpl19,Rpl14,Rpl28,Rpl4,Rpl37,Rpl18a,Rpl30,Rpl18,Rpl11,Rpl26,Rps12,Rpl17,Rpl23,Rpl39,Rpl41	0.242
21	query_1	TRUE	2.1667e-15	40	127	12	0.0944882	0.3	GO:0022627	GO:CC	cytosolic small ribosomal subunit	20820	834	GO:0015935;GO:0022626	IDA ISO IBA NAS,IDA ISO IBA NAS,IDA ISS ISO IBA NAS,IDA ISO NAS,IDA ISO NAS,IDA ISO IBA NAS,IDA ISO IBA NAS,IDA ISS ISO IBA NAS,IDA ISS ISO IBA NAS,IDA ISO IBA NAS,ISO IBA NAS,IDA ISO IBA NAS	Rps9,Rps25,Rps5,Rps24,Rps3a1,Rps20,Rps3,Rps29,Rps21,Rps8,Rps12,Rps15	0.3
22	query_1	TRUE	4.62486e-15	1595	127	43	0.338583	0.0269592	GO:0045202	GO:CC	synapse	20820	2102	GO:0030054	ISO,IDA IMP,ISO,IDA ISO,EXP IDA NAS,EXP IDA,EXP IDA NAS,IDA IMP ISO,EXP IDA,IDA IMP ISO,IDA IMP ISO,EXP IDA IMP ISO,IDA,IDA IMP ISO IBA,EXP IDA NAS,EXP IDA NAS,EXP IDA NAS,EXP IDA NAS,EXP IDA NAS,EXP IDA NAS,IDA IMP IEP,IDA IMP,ISO NAS,IDA,IDA,EXP IDA NAS,IDA IMP IEP ISO,IDA IMP IBA,EXP IDA NAS,IDA ISO,EXP IDA ISO,ISO IBA,IDA IMP ISO IBA,IDA IMP IEP IBA,EXP IDA NAS,ISO,ISO,ISO,EXP IDA ISO NAS,EXP…	Kcnn3,Apoe,Rabac1,Cacna1b,Rps9,Rps25,Rps5,Tnr,Rpl19,Cacnb4,Nf1,Hcn1,Ncam2,Slc18a2,Rps24,Rpl14,Rps3a1,Rps20,Rpl28,Rps3,Pak3,Dcx,Rpl4,Cpne4,Atm,Rps21,Myo9a,Adam22,Rpl37,Pura,Rpl18a,Penk,Sv2c,Shisa6,Rpl30,Rpl18,Ntrk3,Rpl11,Rpl26,Rps12,Rpl17,Rps15,Rpl23	0.027
23	query_1	TRUE	7.89719e-15	710	127	30	0.23622	0.0422535	GO:1990904	GO:CC	ribonucleoprotein complex	20820	4008	GO:0032991	IBA,IDA ISS ISO IBA NAS,IDA ISO IBA NAS,IDA ISS ISO IBA NAS,IDA IPI ISO IBA,IDA ISO,IDA ISS ISO NAS,IDA IPI ISO IBA,IDA ISS ISO NAS,IDA ISO IBA NAS,IDA IBA,IDA IPI ISO IBA,IDA ISS ISO IBA NAS,IDA IPI ISO IBA,IDA ISS ISO IBA NAS,IDA ISS ISO IBA NAS,IDA IPI ISO IBA,IDA IPI ISO IBA,IDA ISS ISO IBA NAS,IDA IPI ISO IBA,IDA IPI ISS ISO IBA,IDA IPI ISO IBA,IDA IPI ISO IBA,ISS ISO IBA NAS,IDA IPI ISO IBA…	Celf2,Rps9,Rps25,Rps5,Rpl19,Rack1,Rps24,Rpl14,Rps3a1,Rps20,Ago3,Rpl28,Rps3,Rpl4,Rps29,Rps21,Rpl37,Rpl18a,Rps8,Rpl30,Rpl18,Rpl11,Rpl26,Rps12,Rpl17,Rps15,Tia1,Rpl23,Rpl39,Rpl41	0.042
24	query_1	TRUE	1.06899e-13	71	127	13	0.102362	0.183099	GO:0015935	GO:CC	small ribosomal subunit	20820	689	GO:0044391	IDA ISO IBA NAS,IDA ISO IBA NAS,IDA ISS ISO IBA NAS,IDA ISO,IDA ISS ISO NAS,IDA ISO NAS,IDA ISO IBA NAS,IDA ISO IBA NAS,IDA ISS ISO IBA NAS,IDA ISS ISO IBA NAS,IDA ISO IBA NAS,ISO IBA NAS,IDA ISO IBA NAS	Rps9,Rps25,Rps5,Rack1,Rps24,Rps3a1,Rps20,Rps3,Rps29,Rps21,Rps8,Rps12,Rps15	0.183
25	query_1	TRUE	1.58007e-13	118	127	15	0.11811	0.127119	GO:0015934	GO:CC	large ribosomal subunit	20820	688	GO:0044391	IDA IPI ISO IBA,IDA IPI ISO IBA,IDA IPI ISO IBA,IDA IPI ISO IBA,IDA IPI ISO IBA,IDA IPI ISO IBA,IDA IPI ISO IBA,IDA IPI ISS ISO IBA,IDA IPI ISO IBA,IDA IPI ISO IBA,ISO,IDA IPI ISO IBA,IDA IPI ISO IBA,IDA IPI ISO IBA,IDA IPI	Rpl19,Rpl14,Rpl28,Rpl4,Rpl37,Rpl18a,Rpl30,Rpl18,Rpl11,Rpl26,Rps12,Rpl17,Rpl23,Rpl39,Rpl41	0.127
26	query_1	TRUE	1.82512e-11	2010	127	43	0.338583	0.021393	GO:0030054	GO:CC	cell junction	20820	844	GO:0110165	ISO,IDA IMP,ISO,IDA ISO,EXP IDA NAS,EXP IDA,EXP IDA NAS,IDA IMP ISO,EXP IDA,IDA IMP ISO,IDA IMP ISO,EXP IDA IMP ISO,IDA,IDA IMP ISO IBA,EXP IDA NAS,EXP IDA NAS,EXP IDA NAS,EXP IDA NAS,EXP IDA NAS,EXP IDA NAS,IDA IMP IEP,IDA IMP,ISO NAS,IDA,IDA,EXP IDA NAS,IDA IMP IEP ISO,IDA IMP IBA,EXP IDA NAS,IDA ISO,EXP IDA ISO,ISO IBA,IDA IMP ISO IBA,IDA IMP IEP IBA,EXP IDA NAS,ISO,ISO,ISO,EXP IDA ISO NAS,EXP…	Kcnn3,Apoe,Rabac1,Cacna1b,Rps9,Rps25,Rps5,Tnr,Rpl19,Cacnb4,Nf1,Hcn1,Ncam2,Slc18a2,Rps24,Rpl14,Rps3a1,Rps20,Rpl28,Rps3,Pak3,Dcx,Rpl4,Cpne4,Atm,Rps21,Myo9a,Adam22,Rpl37,Pura,Rpl18a,Penk,Sv2c,Shisa6,Rpl30,Rpl18,Ntrk3,Rpl11,Rpl26,Rps12,Rpl17,Rps15,Rpl23	0.021
27	query_1	TRUE	1.0333e-08	836	127	25	0.19685	0.0299043	GO:0098794	GO:CC	postsynapse	20820	3187	GO:0045202;GO:0110165	NAS,NAS,IDA,ISO,NAS,NAS,NAS,NAS,NAS,NAS,IDA IEP,ISO NAS,NAS,ISO,IDA IMP IBA,NAS,IDA ISO,EXP IDA ISO,IDA IMP IEP IBA,EXP IDA NAS,ISO,NAS,NAS,NAS,ISO NAS	Rps9,Rps5,Hcn1,Slc18a2,Rps24,Rpl14,Rps3a1,Rps20,Rpl28,Rps3,Pak3,Rpl4,Rps21,Myo9a,Adam22,Rpl37,Pura,Rpl18a,Shisa6,Rpl30,Ntrk3,Rpl26,Rps12,Rpl17,Rpl23	0.03
28	query_1	TRUE	4.08128e-08	4645	127	61	0.480315	0.0131324	GO:0032991	GO:CC	protein-containing complex	20820	1311	GO:0005575	IBA,IBA,IDA ISS ISO IBA,IDA ISO IBA,ISS ISO,IDA ISS ISO IBA NAS,IDA ISO IBA NAS,IDA ISS ISO IBA NAS,IPI,IDA IPI ISO IBA,IDA IMP IBA,ISS IBA,IDA ISO,ISS IBA,ISO,IDA IPI ISO,ISS IBA,IDA IBA,IDA IBA,IDA ISS ISO NAS,IDA IPI ISO IBA,ISS IBA,IDA ISS ISO NAS,IDA ISO IBA NAS,IDA ISS IBA,IDA IBA,IDA IPI ISO IBA,IDA ISS ISO IBA NAS,ISS IBA,ISS IBA,IDA IPI ISO IBA,ISO IBA,IBA,ISO,IDA ISS ISO IBA NAS,ISS,IDA…	Pfdn5,Celf2,Apoe,Cacna1b,Pafah1b3,Rps9,Rps25,Rps5,Tnr,Rpl19,Cacnb4,Socs2,Rack1,Supt4a,Nf1,Fos,Hcn1,Nr4a1,Cox7a2l,Rps24,Rpl14,Ndufb5,Rps3a1,Rps20,Psmb2,Ago3,Rpl28,Rps3,Polr2c,Ciao2b,Rpl4,Chmp2a,Zfc3h1,Atm,Rps29,Hook3,Rps21,Rpl37,Rpl18a,Rps8,Get3,Shisa6,Kcnq3,Scn3a,Gstm1,Rpl30,Rpl18,Ntrk3,Rpl11,Rpl26,Rps12,Rpl17,Rps15,Uqcrh,mt-Atp6,Tia1,Rpl23,Sarnp,Rpl39,Kcnb2,Rpl41	0.013
29	query_1	TRUE	6.47305e-08	2054	127	38	0.299213	0.0185005	GO:0005829	GO:CC	cytosol	20820	367	GO:0005737;GO:0110165	TAS,IDA ISO IBA TAS NAS,IDA ISO IBA TAS NAS,IDA ISS ISO IBA TAS NAS,IDA IPI ISO IBA TAS,IBA,IDA,IDA ISO TAS NAS,IDA IPI ISO IBA TAS,IDA ISO IBA TAS NAS,IDA ISO IBA TAS NAS,IBA TAS,IDA IPI ISO IBA TAS,IDA ISO IBA TAS NAS,TAS,ISS IBA,IDA IPI ISO IBA TAS,IDA,IDA ISS ISO IBA TAS NAS,IDA ISS ISO IBA TAS NAS,IDA IPI ISO IBA TAS,IDA IPI ISO IBA TAS,IDA ISO IBA TAS NAS,TAS,IBA,ISO,IDA IPI ISO IBA TAS,IDA…	Apoe,Rps9,Rps25,Rps5,Rpl19,Rack1,Nr4a1,Rps24,Rpl14,Rps3a1,Rps20,Psmb2,Rpl28,Rps3,Pak3,Ciao2b,Rpl4,Chmp2a,Rps29,Rps21,Rpl37,Rpl18a,Rps8,Tnrc6b,Usp34,Gstm1,Rpl30,Rpl18,Ntrk3,Rpl11,Rpl26,Rps12,Rpl17,Rps15,Rpl23,Nbeal1,Rpl39,Rpl41	0.019
30	query_1	TRUE	9.51861e-06	3254	127	45	0.354331	0.0138291	GO:0043232	GO:CC	intracellular membraneless organelle	20820	1846	GO:0043228;GO:0043229	ISO,IBA,IDA ISO IBA NAS,IDA ISO IBA NAS,IDA ISS ISO IBA NAS,IDA IPI ISO IBA,IDA ISO,IDA,IDA ISS ISO NAS,IDA IPI ISO IBA NAS,IDA ISO NAS,IDA ISO IBA NAS,IDA IBA,IDA IPI ISO IBA NAS,IDA,IDA ISO IBA NAS,ISO,ISS,IDA IPI ISO IBA NAS,ISO,IDA ISS,IDA ISS ISO IBA NAS,ISS,IDA,IDA IBA,ISS,IDA ISS ISO IBA NAS,IBA,IDA IPI ISO IBA NAS,IBA,IDA IPI ISO IBA,IDA ISO IBA NAS,IBA,IBA,IDA IPI ISO IBA NAS,IDA IPI ISS…	Apoe,Fam32a,Rps9,Rps25,Rps5,Rpl19,Rack1,Nr4a1,Rps24,Rpl14,Rps3a1,Rps20,Ago3,Rpl28,Smg1,Rps3,Dcx,Ciao2b,Rpl4,Chmp2a,Atm,Rps29,Vps13c,Mid1,Hook3,Eef1a1,Rps21,Myo9a,Rpl37,Tbca,Rpl18a,Rps8,Tnrc6b,Nsd2,Rpl30,Rpl18,Rpl11,Rpl26,Rps12,Rpl17,Rps15,Tia1,Rpl23,Rpl39,Rpl41	0.014
31	query_1	TRUE	9.60864e-06	3255	127	45	0.354331	0.0138249	GO:0043228	GO:CC	membraneless organelle	20820	1842	GO:0043226	ISO,IBA,IDA ISO IBA NAS,IDA ISO IBA NAS,IDA ISS ISO IBA NAS,IDA IPI ISO IBA,IDA ISO,IDA,IDA ISS ISO NAS,IDA IPI ISO IBA NAS,IDA ISO NAS,IDA ISO IBA NAS,IDA IBA,IDA IPI ISO IBA NAS,IDA,IDA ISO IBA NAS,ISO,ISS,IDA IPI ISO IBA NAS,ISO,IDA ISS,IDA ISS ISO IBA NAS,ISS,IDA,IDA IBA,ISS,IDA ISS ISO IBA NAS,IBA,IDA IPI ISO IBA NAS,IBA,IDA IPI ISO IBA,IDA ISO IBA NAS,IBA,IBA,IDA IPI ISO IBA NAS,IDA IPI ISS…	Apoe,Fam32a,Rps9,Rps25,Rps5,Rpl19,Rack1,Nr4a1,Rps24,Rpl14,Rps3a1,Rps20,Ago3,Rpl28,Smg1,Rps3,Dcx,Ciao2b,Rpl4,Chmp2a,Atm,Rps29,Vps13c,Mid1,Hook3,Eef1a1,Rps21,Myo9a,Rpl37,Tbca,Rpl18a,Rps8,Tnrc6b,Nsd2,Rpl30,Rpl18,Rpl11,Rpl26,Rps12,Rpl17,Rps15,Tia1,Rpl23,Rpl39,Rpl41	0.014
32	query_1	TRUE	0.000548026	722	127	17	0.133858	0.0235457	GO:0098793	GO:CC	presynapse	20820	3186	GO:0045202;GO:0110165	IDA ISO,NAS,ISO,IDA ISO,IDA ISO IBA,NAS,NAS,NAS,NAS,IDA,NAS,ISO IBA,IDA ISO IBA,ISO NAS,NAS,NAS,NAS	Cacna1b,Rps5,Cacnb4,Hcn1,Slc18a2,Rps24,Rpl14,Rpl28,Rpl4,Atm,Rpl37,Penk,Sv2c,Rpl26,Rps12,Rpl17,Rpl23	0.024
33	query_1	TRUE	0.00115069	69	127	6	0.0472441	0.0869565	GO:0032040	GO:CC	small-subunit processome	20820	1210	GO:0030684	ISS,ISS,ISS,ISS,ISS,ISS	Rps9,Rps5,Rps24,Rps3a1,Rps8,Rps12	0.087
34	query_1	TRUE	0.00663804	8807	127	77	0.606299	0.00874305	GO:0005737	GO:CC	cytoplasm	20820	304	GO:0005622;GO:0110165	IDA,IBA,IDA IBA,ISO TAS,IDA IBA,IDA IBA,IDA ISO IBA TAS NAS,IDA ISO IBA TAS NAS,IDA ISS ISO IBA TAS NAS,IBA,IDA IPI ISO IBA TAS,HDA IBA,IBA,IDA ISS IBA,IDA ISO,IDA,HDA ISS ISO IBA,ISS,IDA ISS,HDA,IDA ISS ISO IBA,IDA ISO TAS NAS,IDA IBA,IDA IPI ISO IBA TAS,HDA ISO,IDA ISO IBA TAS NAS,IDA ISO IBA TAS NAS,IBA TAS,IBA,IDA IPI ISO IBA TAS,IDA,IDA ISO IBA TAS NAS,ISO IBA TAS,IDA,IDA,ISS IBA,IDA IPI ISO…	Kcnn3,Pfdn5,Celf2,Apoe,Rabac1,Pafah1b3,Rps9,Rps25,Rps5,Taok1,Rpl19,Fmc1,Srgap1,Rack1,Nf1,Fos,Amacr,Deptor,Nr4a1,Cox7a2l,Slc18a2,Rps24,Tmem192,Rpl14,Ndufb5,Rps3a1,Rps20,Psmb2,Ago3,Rpl28,Smg1,Rps3,Pak3,Dcx,Polr2c,Ciao2b,Rpl4,Chmp2a,Atm,Rps29,Scai,Vps13c,Mid1,Shq1,Hook3,Eef1a1,Rps21,Rpl37,Uggt2,Hecw2,Pura,Rpl18a,Penk,Rps8,Tnrc6b,Sv2c,Get3,Usp34,Scn3a,Gstm1,Rpl30,Rpl18,Ntrk3,Rpl11,Rpl26,Rps12,Rpl17,R…	0.009
35	query_1	TRUE	0.00874784	98	127	6	0.0472441	0.0612245	GO:0030684	GO:CC	preribosome	20820	942	GO:1990904	ISS,ISS,ISS,ISS,ISS,ISS	Rps9,Rps5,Rps24,Rps3a1,Rps8,Rps12	0.061
36	query_1	TRUE	0.0315748	378	127	10	0.0787402	0.026455	GO:1902495	GO:CC	transmembrane transporter complex	20820	3603	GO:0098796;GO:1990351	IDA IBA,IDA IMP IBA,ISS IBA,ISS IBA,IDA IBA,IGI ISS ISO IBA,ISO IBA,IBA,IBA,ISS ISO IBA	Cacna1b,Cacnb4,Hcn1,Ndufb5,Shisa6,Kcnq3,Scn3a,Uqcrh,mt-Atp6,Kcnb2	0.026
37	query_1	TRUE	0.0328942	10832	127	87	0.685039	0.00803176	GO:0043226	GO:CC	organelle	20820	1840	GO:0110165	IDA ISS IBA,ISO IBA,IBA,IDA IBA,IDA ISO IBA NAS,IDA ISO IBA NAS,IDA ISS ISO IBA NAS,IDA IPI ISO IBA,ISO,HDA IBA,IDA ISS ISO IBA,ISS IBA,ISO,IDA IPI ISO IBA TAS IC,HDA ISS ISO IBA,ISS,IDA ISS IBA,HDA,IBA,IDA ISS ISO IBA,IDA ISS ISO NAS,IDA IBA,IDA IPI ISO IBA NAS,HDA ISO,IDA ISO NAS,IDA ISO IBA NAS,IBA TAS,IDA IBA,IDA IPI ISO IBA NAS,IDA IBA,IDA ISO IBA NAS,IDA IEP ISO,ISO,IDA ISS IBA TAS,ISS,IDA …	Celf2,Apoe,Fam32a,Rabac1,Rps9,Rps25,Rps5,Rpl19,Cacnb4,Fmc1,Rack1,Supt4a,Nf1,Fos,Amacr,Deptor,Nr4a1,Cox7a2l,Lcor,Slc18a2,Rps24,Tmem192,Rpl14,Ndufb5,Rps3a1,Rps20,Psmb2,Ago3,Rpl28,Smg1,Rps3,Pak3,Dcx,Polr2c,Ciao2b,Gpr83,Rpl4,Chmp2a,Zfc3h1,Atm,Rps29,Scai,Vps13c,Mid1,Shq1,Hook3,Eef1a1,Ubn2,Rps21,Myo9a,Adam22,Tet2,Rpl37,Tbca,Uggt2,Pura,Csrnp3,Rpl18a,Penk,Rps8,Tnrc6b,Sv2c,Get3,Shisa6,Srsf11,Usp34,Nsd2,Rp…	0.008
38	query_1	TRUE	0.0368534	244	127	8	0.0629921	0.0327869	GO:0034702	GO:CC	monoatomic ion channel complex	20820	1505	GO:1902495	IDA IBA,IDA IMP IBA,ISS IBA,IDA IBA,IGI ISS ISO IBA,ISO IBA,IBA,ISS ISO IBA	Cacna1b,Cacnb4,Hcn1,Shisa6,Kcnq3,Scn3a,mt-Atp6,Kcnb2	0.033
39	query_1	TRUE	0.0405847	726	127	14	0.110236	0.0192837	GO:0098978	GO:CC	glutamatergic synapse	20820	3246	GO:0045202	IDA IMP,ISO,IDA IMP ISO,IDA IMP,IDA IMP ISO,EXP IDA IMP,IDA IMP IEP,IDA IMP,IDA,ISO,IDA IMP,IDA,IDA IMP IEP,ISO	Apoe,Cacna1b,Tnr,Cacnb4,Nf1,Hcn1,Pak3,Dcx,Cpne4,Myo9a,Adam22,Pura,Shisa6,Ntrk3	0.019
40	query_1	TRUE	0.0433569	393	127	10	0.0787402	0.0254453	GO:1990351	GO:CC	transporter complex	20820	3849	GO:0032991	IDA IBA,IDA IMP IBA,ISS IBA,ISS IBA,IDA IBA,IGI ISS ISO IBA,ISO IBA,IBA,IBA,ISS ISO IBA	Cacna1b,Cacnb4,Hcn1,Ndufb5,Shisa6,Kcnq3,Scn3a,Uqcrh,mt-Atp6,Kcnb2	0.025
41	query_1	TRUE	0.045146	188	127	7	0.0551181	0.037234	GO:0034703	GO:CC	cation channel complex	20820	1506	GO:0034702	IDA IBA,IDA IMP IBA,ISS IBA,IGI ISS ISO IBA,ISO IBA,IBA,ISS ISO IBA	Cacna1b,Cacnb4,Hcn1,Kcnq3,Scn3a,mt-Atp6,Kcnb2	0.037
42	query_1	TRUE	0.0488165	1337	127	20	0.15748	0.0149589	GO:0043005	GO:CC	neuron projection	20820	1808	GO:0120025	IBA,ISO,IDA ISO,IDA,ISO,IDA ISO IBA,IDA,ISS ISO IBA,ISO,IDA ISS ISO,IDA IBA,IDA ISO,IDA,ISO IBA,IBA,IDA IMP ISO IBA,ISO IBA,IBA,ISO,ISS ISO IBA	Kcnn3,Apoe,Cacna1b,Rack1,Nf1,Hcn1,Ncam2,Slc18a2,Rps3,Dcx,Myo9a,Adam22,Pura,Penk,Shisa6,Kcnq3,Scn3a,Ntrk3,Rpl26,Kcnb2	0.015
43	query_1	TRUE	9.60868e-29	145	123	26	0.211382	0.17931	GO:0003735	GO:MF	structural constituent of ribosome	20512	340	GO:0005198	IDA IBA,IDA ISO IBA,IDA IBA,IDA IBA,IDA ISO,IDA IBA,IDA,IDA IBA,IDA,IDA IBA,IDA IBA,IDA ISO IBA,IDA IBA,IDA,IDA,IDA IBA,IDA IBA,IDA IBA,IDA IBA,IDA IBA,IBA,IDA IBA,IDA ISO IBA,IDA ISO IBA,IDA,IDA	Rps9,Rps25,Rps5,Rpl19,Rps24,Rpl14,Rps3a1,Rps20,Rpl28,Rps3,Rpl4,Rps29,Rps21,Rpl37,Rpl18a,Rps8,Rpl30,Rpl18,Rpl11,Rpl26,Rps12,Rpl17,Rps15,Rpl23,Rpl39,Rpl41	0.179
44	query_1	TRUE	2.98118e-16	480	123	27	0.219512	0.05625	GO:0005198	GO:MF	structural molecule activity	20512	1318	GO:0003674	IDA IBA,IDA ISO IBA,IDA IBA,IDA IBA,IDA ISO,IDA IBA,IDA,IDA IBA,IDA,RCA,IDA IBA,IDA IBA,IDA ISO IBA,IDA IBA,IDA,IDA,IDA IBA,IDA IBA,IDA IBA,IDA IBA,IDA IBA,IBA,IDA IBA,IDA ISO IBA,IDA ISO IBA,IDA,IDA	Rps9,Rps25,Rps5,Rpl19,Rps24,Rpl14,Rps3a1,Rps20,Rpl28,Mfge8,Rps3,Rpl4,Rps29,Rps21,Rpl37,Rpl18a,Rps8,Rpl30,Rpl18,Rpl11,Rpl26,Rps12,Rpl17,Rps15,Rpl23,Rpl39,Rpl41	0.056
45	query_1	TRUE	0.000438113	55	123	6	0.0487805	0.109091	GO:0019843	GO:MF	rRNA binding	20512	3478	GO:0003723	ISO IBA,IBA,ISO,ISO,ISO,IBA	Rps9,Rps5,Rpl19,Rpl4,Rpl17,Rpl23	0.109
46	query_1	TRUE	0.00288849	892	123	18	0.146341	0.0201794	GO:0003723	GO:MF	RNA binding	20512	333	GO:0003676	IPI ISO IBA,ISO IBA,IBA,ISO IBA,IBA,ISO,IDA IBA,ISO IBA,ISO,IBA,IBA,ISO IBA,IBA,IBA,IBA,ISO,IDA,IBA	Celf2,Rps9,Rps5,Rpl19,Rpl14,Rps3a1,Ago3,Rpl4,Eef1a1,Rpl37,Srsf11,Rpl30,Rpl18,Rpl11,Rpl26,Rpl17,Tia1,Rpl23	0.02
47	query_1	TRUE	0.00338148	7	123	3	0.0243902	0.428571	GO:0070180	GO:MF	large ribosomal subunit rRNA binding	20512	7982	GO:0019843	ISO,ISO,IBA	Rpl19,Rpl17,Rpl23	0.429
48	query_1	TRUE	0.00438334	123	123	7	0.0569106	0.0569106	GO:0022843	GO:MF	voltage-gated monoatomic cation channel activity	20512	3546	GO:0005244;GO:0005261	IDA IMP ISO IBA,IDA IMP ISO IBA TAS,IMP ISS IBA,IDA,ISS ISO IBA,ISO IBA,ISS ISO IBA	Cacna1b,Cacnb4,Hcn1,Cacna1h,Kcnq3,Kcnh7,Kcnb2	0.057
49	query_1	TRUE	0.00626477	439	123	12	0.097561	0.0273349	GO:0005216	GO:MF	monoatomic ion channel activity	20512	1326	GO:0015075;GO:0015267	ISO IBA,IDA IMP ISO IBA,IDA IMP ISO IBA TAS,IDA,EXP IDA IMP ISS IBA,IDA,IBA,IMP IGI ISS ISO IBA,ISO TAS,ISO IBA,IBA,ISS ISO IBA	Kcnn3,Cacna1b,Cacnb4,Rack1,Hcn1,Cacna1h,Ano4,Kcnq3,Scn3a,Kcnh7,mt-Atp6,Kcnb2	0.027
50	query_1	TRUE	0.0139557	147	123	7	0.0569106	0.047619	GO:0005244	GO:MF	voltage-gated monoatomic ion channel activity	20512	1343	GO:0005216;GO:0022832	IDA IMP ISO IBA,IDA IMP ISO IBA TAS,IMP ISS IBA,IDA,IGI ISS ISO IBA,ISO IBA,ISS ISO IBA	Cacna1b,Cacnb4,Hcn1,Cacna1h,Kcnq3,Kcnh7,Kcnb2	0.048
51	query_1	TRUE	0.0145765	148	123	7	0.0569106	0.0472973	GO:0022832	GO:MF	voltage-gated channel activity	20512	3538	GO:0022836	IDA IMP ISO IBA,IDA IMP ISO IBA TAS,IMP ISS IBA,IDA,IGI ISS ISO IBA,ISO IBA,ISS ISO IBA	Cacna1b,Cacnb4,Hcn1,Cacna1h,Kcnq3,Kcnh7,Kcnb2	0.047
52	query_1	TRUE	0.0191528	492	123	12	0.097561	0.0243902	GO:0022803	GO:MF	passive transmembrane transporter activity	20512	3528	GO:0022857	ISO IBA,IDA IMP ISO IBA,IDA IMP ISO IBA TAS,IDA,EXP IDA IMP ISS IBA,IDA,IBA,IMP IGI ISS ISO IBA,ISO TAS,ISO IBA,IBA,ISS ISO IBA	Kcnn3,Cacna1b,Cacnb4,Rack1,Hcn1,Cacna1h,Ano4,Kcnq3,Scn3a,Kcnh7,mt-Atp6,Kcnb2	0.024
53	query_1	TRUE	0.0191528	492	123	12	0.097561	0.0243902	GO:0015267	GO:MF	channel activity	20512	2395	GO:0022803	ISO IBA,IDA IMP ISO IBA,IDA IMP ISO IBA TAS,IDA,EXP IDA IMP ISS IBA,IDA,IBA,IMP IGI ISS ISO IBA,ISO TAS,ISO IBA,IBA,ISS ISO IBA	Kcnn3,Cacna1b,Cacnb4,Rack1,Hcn1,Cacna1h,Ano4,Kcnq3,Scn3a,Kcnh7,mt-Atp6,Kcnb2	0.024
54	query_1	TRUE	0.0197593	343	123	10	0.0813008	0.0291545	GO:0005261	GO:MF	monoatomic cation channel activity	20512	1355	GO:0005216;GO:0008324	ISO IBA,IDA IMP ISO IBA,IDA IMP ISO IBA TAS,EXP IDA IMP ISS IBA,IDA,IMP IGI ISS ISO IBA,ISO TAS,ISO IBA,IBA,ISS ISO IBA	Kcnn3,Cacna1b,Cacnb4,Hcn1,Cacna1h,Kcnq3,Scn3a,Kcnh7,mt-Atp6,Kcnb2	0.029
55	query_1	TRUE	0.028603	683	123	14	0.113821	0.0204978	GO:0015075	GO:MF	monoatomic ion transmembrane transporter activity	20512	2249	GO:0022857	ISO IBA,IDA IMP ISO IBA,IDA IMP ISO IBA TAS,IDA,EXP IDA IMP ISS IBA,IDA,ISO IBA,IBA,IMP IGI ISS ISO IBA,ISO TAS,ISO IBA,ISS,IBA,ISS ISO IBA	Kcnn3,Cacna1b,Cacnb4,Rack1,Hcn1,Cacna1h,Slc18a2,Ano4,Kcnq3,Scn3a,Kcnh7,Uqcrh,mt-Atp6,Kcnb2	0.02
56	query_1	TRUE	0.0449319	538	123	12	0.097561	0.0223048	GO:0022890	GO:MF	inorganic cation transmembrane transporter activity	20512	3575	GO:0015318	ISO IBA,IDA IMP ISO IBA,IDA IMP ISO IBA TAS,IMP IBA,IDA,ISO IBA,IMP IGI ISS ISO IBA,ISO TAS,ISO IBA,ISS,IBA,ISS ISO IBA	Kcnn3,Cacna1b,Cacnb4,Hcn1,Cacna1h,Slc18a2,Kcnq3,Scn3a,Kcnh7,Uqcrh,mt-Atp6,Kcnb2	0.022
57	query_1	TRUE	0.000105772	197	46	12	0.26087	0.0609137	HP:0100660	HP	Dyskinesia	5228	16307	HP:0100022	HP,HP,HP,HP,HP,HP,HP,HP,HP,HP,HP,HP	Celf2,Cacna1b,Hcn1,Slc18a2,Rps20,Grin2b,Atm,Vps13c,Hecw2,Pura,Scn3a,mt-Atp6	0.061
58	query_1	TRUE	0.000476247	272	46	13	0.282609	0.0477941	HP:0011198	HP	EEG with generalized epileptiform discharges	5228	7572	HP:0011182	HP,HP,HP,HP,HP,HP,HP,HP,HP,HP,HP,HP,HP	Celf2,Cacna1e,Cacna1b,Cacnb4,Nf1,Hcn1,Cacna1h,Grin2b,Dcx,Myo9a,Kcnq3,Scn3a,Kcnma1	0.048
59	query_1	TRUE	0.0022042	545	46	17	0.369565	0.0311927	HP:0002353	HP	EEG abnormality	5228	1719	HP:0030178	HP,HP,HP,HP,HP,HP,HP,HP,HP,HP,HP,HP,HP,HP,HP,HP,HP	Celf2,Cacna1e,Cacna1b,Cacnb4,Nf1,Hcn1,Cacna1h,Grin2b,Dcx,Shq1,Myo9a,Hecw2,Pura,Kcnq3,Scn3a,Nsd2,Kcnma1	0.031
60	query_1	TRUE	0.00286666	622	46	18	0.391304	0.0289389	HP:0030178	HP	Abnormality of central nervous system electrophysiology	5228	10455	HP:0001311	HP,HP,HP,HP,HP,HP,HP,HP,HP,HP,HP,HP,HP,HP,HP,HP,HP,HP	Celf2,Cacna1e,Cacna1b,Cacnb4,Nf1,Hcn1,Cacna1h,Grin2b,Dcx,Shq1,Myo9a,Hecw2,Pura,Kcnq3,Scn3a,Nsd2,Kcnma1,mt-Atp6	0.029
61	query_1	TRUE	0.00317565	321	46	13	0.282609	0.0404984	HP:0011182	HP	Interictal epileptiform activity	5228	7556	HP:0025373	HP,HP,HP,HP,HP,HP,HP,HP,HP,HP,HP,HP,HP	Celf2,Cacna1e,Cacna1b,Cacnb4,Nf1,Hcn1,Cacna1h,Grin2b,Dcx,Myo9a,Kcnq3,Scn3a,Kcnma1	0.04
62	query_1	TRUE	0.00345501	26	46	5	0.108696	0.192308	HP:0012133	HP	Erythroid hypoplasia	5228	8492	HP:0012131	HP,HP,HP,HP,HP	Rps20,Rps29,Tet2,Rpl11,Rpl26	0.192
63	query_1	TRUE	0.0037789	326	46	13	0.282609	0.0398773	HP:0025373	HP	Interictal EEG abnormality	5228	9831	HP:0002353	HP,HP,HP,HP,HP,HP,HP,HP,HP,HP,HP,HP,HP	Celf2,Cacna1e,Cacna1b,Cacnb4,Nf1,Hcn1,Cacna1h,Grin2b,Dcx,Myo9a,Kcnq3,Scn3a,Kcnma1	0.04
64	query_1	TRUE	0.00484839	1026	46	23	0.5	0.0224172	HP:0100543	HP	Cognitive impairment	5228	16198	HP:0011446	HP,HP,HP,HP,HP,HP,HP,HP,HP,HP,HP,HP,HP,HP,HP,HP,HP,HP,HP,HP,HP,HP,HP	Celf2,Apoe,Cacna1b,Taok1,Nf1,Hcn1,Amacr,Cacna1h,Slc18a2,Rps20,Pak3,Dcx,Atm,Vps13c,Mid1,Pura,Tnrc6b,Kcnq3,Scn3a,Zic2,Uqcrh,mt-Atp6,Tia1	0.022
65	query_1	TRUE	0.00928097	1823	46	31	0.673913	0.0170049	HP:0025792	HP	Abnormal cognitive process	5228	10223	HP:0011446	HP,HP,HP,HP,HP,HP,HP,HP,HP,HP,HP,HP,HP,HP,HP,HP,HP,HP,HP,HP,HP,HP,HP,HP,HP,HP,HP,HP,HP,HP,HP	Celf2,Apoe,Cacna1e,Cacna1b,Tnr,Taok1,Cacnb4,Nf1,Hcn1,Amacr,Cacna1h,Slc18a2,Rps20,Grin2b,Pak3,Dcx,Atm,Mid1,Shq1,Myo9a,Adam22,Hecw2,Pura,Tnrc6b,Scn3a,Zic2,Kcnma1,Brwd3,mt-Atp6,Hba-a2,Tia1	0.017
66	query_1	TRUE	0.0113817	360	46	13	0.282609	0.0361111	HP:0001336	HP	Myoclonus	5228	1005	HP:0004305	HP,HP,HP,HP,HP,HP,HP,HP,HP,HP,HP,HP,HP	Celf2,Apoe,Cacna1e,Cacna1b,Cacnb4,Hcn1,Cacna1h,Grin2b,Atm,Pura,Kcnq3,Scn3a,mt-Atp6	0.036
67	query_1	TRUE	0.0132836	208	46	10	0.217391	0.0480769	HP:0002133	HP	Status epilepticus	5228	1559	HP:0001250	HP,HP,HP,HP,HP,HP,HP,HP,HP,HP	Celf2,Cacna1e,Cacna1b,Cacnb4,Hcn1,Amacr,Grin2b,Kcnq3,Scn3a,Kcnma1	0.048
68	query_1	TRUE	0.0176915	128	46	8	0.173913	0.0625	HP:0200134	HP	Epileptic encephalopathy	5228	16668	HP:0001298	HP,HP,HP,HP,HP,HP,HP,HP	Celf2,Cacna1e,Cacna1b,Hcn1,Grin2b,Dcx,Adam22,Scn3a	0.062
69	query_1	TRUE	0.0185441	36	46	5	0.108696	0.138889	HP:0001895	HP	Normochromic anemia	5228	1369	HP:0010972	HP,HP,HP,HP,HP	Rps20,Rps29,Tet2,Rpl11,Rpl26	0.139
70	query_1	TRUE	0.020081	1778	46	30	0.652174	0.0168729	HP:0034434	HP	Abnormal communication	5228	14544	HP:0025792	HP,HP,HP,HP,HP,HP,HP,HP,HP,HP,HP,HP,HP,HP,HP,HP,HP,HP,HP,HP,HP,HP,HP,HP,HP,HP,HP,HP,HP,HP	Celf2,Apoe,Cacna1e,Cacna1b,Tnr,Taok1,Cacnb4,Nf1,Hcn1,Amacr,Slc18a2,Rps20,Grin2b,Pak3,Dcx,Atm,Mid1,Shq1,Myo9a,Adam22,Hecw2,Pura,Tnrc6b,Scn3a,Zic2,Kcnma1,Brwd3,mt-Atp6,Hba-a2,Tia1	0.017
71	query_1	TRUE	0.0218529	507	46	15	0.326087	0.0295858	HP:0000736	HP	Short attention span	5228	571	HP:5200044	HP,HP,HP,HP,HP,HP,HP,HP,HP,HP,HP,HP,HP,HP,HP	Celf2,Cacna1b,Taok1,Nf1,Hcn1,Cacna1h,Rps20,Pak3,Atm,Vps13c,Mid1,Pura,Tnrc6b,Scn3a,Zic2	0.03
72	query_1	TRUE	0.0259981	725	46	18	0.391304	0.0248276	HP:0001311	HP	Abnormal nervous system electrophysiology	5228	989	HP:0012638	HP,HP,HP,HP,HP,HP,HP,HP,HP,HP,HP,HP,HP,HP,HP,HP,HP,HP	Celf2,Cacna1e,Cacna1b,Cacnb4,Nf1,Hcn1,Cacna1h,Grin2b,Dcx,Shq1,Myo9a,Hecw2,Pura,Kcnq3,Scn3a,Nsd2,Kcnma1,mt-Atp6	0.025
73	query_1	TRUE	0.0264186	515	46	15	0.326087	0.0291262	HP:5200044	HP	Reduced attention regulation	5228	17719	HP:0100543	HP,HP,HP,HP,HP,HP,HP,HP,HP,HP,HP,HP,HP,HP,HP	Celf2,Cacna1b,Taok1,Nf1,Hcn1,Cacna1h,Rps20,Pak3,Atm,Vps13c,Mid1,Pura,Tnrc6b,Scn3a,Zic2	0.029
74	query_1	TRUE	0.0334559	3194	46	41	0.891304	0.0128366	HP:0011446	HP	Abnormality of mental function	5228	7814	HP:0012638	HP,HP,HP,HP,HP,HP,HP,HP,HP,HP,HP,HP,HP,HP,HP,HP,HP,HP,HP,HP,HP,HP,HP,HP,HP,HP,HP,HP,HP,HP,HP,HP,HP,HP,HP,HP,HP,HP,HP,HP,HP	Kcnn3,Celf2,Apoe,Cacna1e,Cacna1b,Tnr,Taok1,Cacnb4,Nf1,Fos,Hcn1,Amacr,Cacna1h,Slc18a2,Rps20,Grin2b,Pak3,Dcx,Atm,Rps29,Vps13c,Mid1,Shq1,Myo9a,Adam22,Tet2,Hecw2,Pura,Tnrc6b,Kcnq3,Scn3a,Nsd2,Rpl11,Rpl26,Zic2,Kcnma1,Brwd3,Uqcrh,mt-Atp6,Hba-a2,Tia1	0.013
75	query_1	TRUE	0.0344495	2905	46	39	0.847826	0.0134251	HP:0003011	HP	Abnormality of the musculature	5228	2167	HP:0033127	HP,HP,HP,HP,HP,HP,HP,HP,HP,HP,HP,HP,HP,HP,HP,HP,HP,HP,HP,HP,HP,HP,HP,HP,HP,HP,HP,HP,HP,HP,HP,HP,HP,HP,HP,HP,HP,HP,HP	Kcnn3,Celf2,Apoe,Cacna1e,Cacna1b,Tnr,Taok1,Nf1,Fos,Hcn1,Amacr,Slc18a2,Rps20,Grin2b,Pak3,Dcx,Atm,Rps29,Vps13c,Mid1,Shq1,Myo9a,Adam22,Tet2,Hecw2,Pura,Tnrc6b,Get3,Kcnq3,Scn3a,Nsd2,Rpl11,Rpl26,Zic2,Kcnma1,Brwd3,mt-Atp6,Hba-a2,Tia1	0.013
76	query_1	TRUE	0.0402177	21	46	4	0.0869565	0.190476	HP:0020118	HP	Radial artery aplasia	5228	9316	HP:0031640	HP,HP,HP,HP	Rps20,Rps29,Rpl11,Rpl26	0.19
77	query_1	TRUE	0.0402177	21	46	4	0.0869565	0.190476	HP:0030270	HP	Elevated red cell adenosine deaminase activity	5228	10539	HP:4000209	HP,HP,HP,HP	Rps20,Rps29,Rpl11,Rpl26	0.19
78	query_1	TRUE	0.0402177	21	46	4	0.0869565	0.190476	HP:0031640	HP	Abnormal radial artery morphology	5228	11827	HP:0011004	HP,HP,HP,HP	Rps20,Rps29,Rpl11,Rpl26	0.19
79	query_1	TRUE	0.0407857	1731	46	29	0.630435	0.0167533	HP:4000072	HP	Abnormal language feature	5228	17510	HP:0034434	HP,HP,HP,HP,HP,HP,HP,HP,HP,HP,HP,HP,HP,HP,HP,HP,HP,HP,HP,HP,HP,HP,HP,HP,HP,HP,HP,HP,HP	Celf2,Apoe,Cacna1e,Cacna1b,Tnr,Taok1,Cacnb4,Nf1,Hcn1,Amacr,Slc18a2,Rps20,Grin2b,Pak3,Dcx,Atm,Mid1,Shq1,Myo9a,Hecw2,Pura,Tnrc6b,Scn3a,Zic2,Kcnma1,Brwd3,mt-Atp6,Hba-a2,Tia1	0.017
80	query_1	TRUE	0.0407857	1731	46	29	0.630435	0.0167533	HP:0002167	HP	Abnormal speech pattern	5228	1587	HP:4000072	HP,HP,HP,HP,HP,HP,HP,HP,HP,HP,HP,HP,HP,HP,HP,HP,HP,HP,HP,HP,HP,HP,HP,HP,HP,HP,HP,HP,HP	Celf2,Apoe,Cacna1e,Cacna1b,Tnr,Taok1,Cacnb4,Nf1,Hcn1,Amacr,Slc18a2,Rps20,Grin2b,Pak3,Dcx,Atm,Mid1,Shq1,Myo9a,Hecw2,Pura,Tnrc6b,Scn3a,Zic2,Kcnma1,Brwd3,mt-Atp6,Hba-a2,Tia1	0.017
81	query_1	TRUE	0.0440708	145	46	8	0.173913	0.0551724	HP:0000980	HP	Pallor	5228	765	HP:0011121	HP,HP,HP,HP,HP,HP,HP,HP	Nf1,Cacna1h,Rps20,Rps29,Tet2,Rpl11,Rpl26,Hba-a2	0.055
82	query_1	TRUE	0.0488394	22	46	4	0.0869565	0.181818	HP:4000209	HP	Abnormal erythrocyte adenosine deaminase activity	5228	17634	HP:0030272	HP,HP,HP,HP	Rps20,Rps29,Rpl11,Rpl26	0.182
83	query_1	TRUE	1.03438e-23	170	84	26	0.309524	0.152941	KEGG:03010	KEGG	Ribosome	9330	208	KEGG:00000	KEGG,KEGG,KEGG,KEGG,KEGG,KEGG,KEGG,KEGG,KEGG,KEGG,KEGG,KEGG,KEGG,KEGG,KEGG,KEGG,KEGG,KEGG,KEGG,KEGG,KEGG,KEGG,KEGG,KEGG,KEGG,KEGG	Rps9,Rps25,Rps5,Rpl19,Rps24,Rpl14,Rps3a1,Rps20,Rpl28,Rps3,Rpl4,Rps29,Rps21,Rpl37,Rpl18a,Rps8,Rpl30,Rpl18,Rpl11,Rpl26,Rps12,Rpl17,Rps15,Rpl23,Rpl39,Rpl41	0.153
84	query_1	TRUE	6.90183e-21	243	84	27	0.321429	0.111111	KEGG:05171	KEGG	Coronavirus disease - COVID-19	9330	452	KEGG:00000	KEGG,KEGG,KEGG,KEGG,KEGG,KEGG,KEGG,KEGG,KEGG,KEGG,KEGG,KEGG,KEGG,KEGG,KEGG,KEGG,KEGG,KEGG,KEGG,KEGG,KEGG,KEGG,KEGG,KEGG,KEGG,KEGG,KEGG	Rps9,Rps25,Rps5,Rpl19,Fos,Rps24,Rpl14,Rps3a1,Rps20,Rpl28,Rps3,Rpl4,Rps29,Rps21,Rpl37,Rpl18a,Rps8,Rpl30,Rpl18,Rpl11,Rpl26,Rps12,Rpl17,Rps15,Rpl23,Rpl39,Rpl41	0.111
85	query_1	TRUE	4.49676e-28	93	82	25	0.304878	0.268817	REAC:R-MMU-1799339	REAC	SRP-dependent cotranslational protein targeting to membrane	8469	1390	REAC:R-MMU-72766	REAC,REAC,REAC,REAC,REAC,REAC,REAC,REAC,REAC,REAC,REAC,REAC,REAC,REAC,REAC,REAC,REAC,REAC,REAC,REAC,REAC,REAC,REAC,REAC,REAC	Rps9,Rps25,Rps5,Rpl19,Rps24,Rpl14,Rps3a1,Rps20,Rpl28,Rps3,Rpl4,Rps29,Rps21,Rpl37,Rpl18a,Rps8,Rpl30,Rpl18,Rpl11,Rpl26,Rps12,Rpl17,Rps15,Rpl23,Rpl39	0.269
86	query_1	TRUE	8.20553e-28	95	82	25	0.304878	0.263158	REAC:R-MMU-975956	REAC	Nonsense Mediated Decay (NMD) independent of the Exon Junction Complex (EJC)	8469	979	REAC:R-MMU-927802	REAC,REAC,REAC,REAC,REAC,REAC,REAC,REAC,REAC,REAC,REAC,REAC,REAC,REAC,REAC,REAC,REAC,REAC,REAC,REAC,REAC,REAC,REAC,REAC,REAC	Rps9,Rps25,Rps5,Rpl19,Rps24,Rpl14,Rps3a1,Rps20,Rpl28,Rps3,Rpl4,Rps29,Rps21,Rpl37,Rpl18a,Rps8,Rpl30,Rpl18,Rpl11,Rpl26,Rps12,Rpl17,Rps15,Rpl23,Rpl39	0.263
87	query_1	TRUE	3.0379e-27	114	82	26	0.317073	0.22807	REAC:R-MMU-927802	REAC	Nonsense-Mediated Decay (NMD)	8469	980	REAC:R-MMU-8953854	REAC,REAC,REAC,REAC,REAC,REAC,REAC,REAC,REAC,REAC,REAC,REAC,REAC,REAC,REAC,REAC,REAC,REAC,REAC,REAC,REAC,REAC,REAC,REAC,REAC,REAC	Rps9,Rps25,Rps5,Rpl19,Rps24,Rpl14,Rps3a1,Rps20,Rpl28,Smg1,Rps3,Rpl4,Rps29,Rps21,Rpl37,Rpl18a,Rps8,Rpl30,Rpl18,Rpl11,Rpl26,Rps12,Rpl17,Rps15,Rpl23,Rpl39	0.228
88	query_1	TRUE	3.0379e-27	114	82	26	0.317073	0.22807	REAC:R-MMU-975957	REAC	Nonsense Mediated Decay (NMD) enhanced by the Exon Junction Complex (EJC)	8469	978	REAC:R-MMU-927802	REAC,REAC,REAC,REAC,REAC,REAC,REAC,REAC,REAC,REAC,REAC,REAC,REAC,REAC,REAC,REAC,REAC,REAC,REAC,REAC,REAC,REAC,REAC,REAC,REAC,REAC	Rps9,Rps25,Rps5,Rpl19,Rps24,Rpl14,Rps3a1,Rps20,Rpl28,Smg1,Rps3,Rpl4,Rps29,Rps21,Rpl37,Rpl18a,Rps8,Rpl30,Rpl18,Rpl11,Rpl26,Rps12,Rpl17,Rps15,Rpl23,Rpl39	0.228
89	query_1	TRUE	6.01829e-27	102	82	25	0.304878	0.245098	REAC:R-MMU-72689	REAC	Formation of a pool of free 40S subunits	8469	525	REAC:R-MMU-72737	REAC,REAC,REAC,REAC,REAC,REAC,REAC,REAC,REAC,REAC,REAC,REAC,REAC,REAC,REAC,REAC,REAC,REAC,REAC,REAC,REAC,REAC,REAC,REAC,REAC	Rps9,Rps25,Rps5,Rpl19,Rps24,Rpl14,Rps3a1,Rps20,Rpl28,Rps3,Rpl4,Rps29,Rps21,Rpl37,Rpl18a,Rps8,Rpl30,Rpl18,Rpl11,Rpl26,Rps12,Rpl17,Rps15,Rpl23,Rpl39	0.245
90	query_1	TRUE	7.9722e-26	112	82	25	0.304878	0.223214	REAC:R-MMU-156827	REAC	L13a-mediated translational silencing of Ceruloplasmin expression	8469	782	REAC:R-MMU-72613	REAC,REAC,REAC,REAC,REAC,REAC,REAC,REAC,REAC,REAC,REAC,REAC,REAC,REAC,REAC,REAC,REAC,REAC,REAC,REAC,REAC,REAC,REAC,REAC,REAC	Rps9,Rps25,Rps5,Rpl19,Rps24,Rpl14,Rps3a1,Rps20,Rpl28,Rps3,Rpl4,Rps29,Rps21,Rpl37,Rpl18a,Rps8,Rpl30,Rpl18,Rpl11,Rpl26,Rps12,Rpl17,Rps15,Rpl23,Rpl39	0.223
91	query_1	TRUE	1.017e-25	113	82	25	0.304878	0.221239	REAC:R-MMU-72706	REAC	GTP hydrolysis and joining of the 60S ribosomal subunit	8469	588	REAC:R-MMU-72737	REAC,REAC,REAC,REAC,REAC,REAC,REAC,REAC,REAC,REAC,REAC,REAC,REAC,REAC,REAC,REAC,REAC,REAC,REAC,REAC,REAC,REAC,REAC,REAC,REAC	Rps9,Rps25,Rps5,Rpl19,Rps24,Rpl14,Rps3a1,Rps20,Rpl28,Rps3,Rpl4,Rps29,Rps21,Rpl37,Rpl18a,Rps8,Rpl30,Rpl18,Rpl11,Rpl26,Rps12,Rpl17,Rps15,Rpl23,Rpl39	0.221
92	query_1	TRUE	5.22871e-25	120	82	25	0.304878	0.208333	REAC:R-MMU-72613	REAC	Eukaryotic Translation Initiation	8469	470	REAC:R-MMU-72766	REAC,REAC,REAC,REAC,REAC,REAC,REAC,REAC,REAC,REAC,REAC,REAC,REAC,REAC,REAC,REAC,REAC,REAC,REAC,REAC,REAC,REAC,REAC,REAC,REAC	Rps9,Rps25,Rps5,Rpl19,Rps24,Rpl14,Rps3a1,Rps20,Rpl28,Rps3,Rpl4,Rps29,Rps21,Rpl37,Rpl18a,Rps8,Rpl30,Rpl18,Rpl11,Rpl26,Rps12,Rpl17,Rps15,Rpl23,Rpl39	0.208
93	query_1	TRUE	5.22871e-25	120	82	25	0.304878	0.208333	REAC:R-MMU-72737	REAC	Cap-dependent Translation Initiation	8469	241	REAC:R-MMU-72613	REAC,REAC,REAC,REAC,REAC,REAC,REAC,REAC,REAC,REAC,REAC,REAC,REAC,REAC,REAC,REAC,REAC,REAC,REAC,REAC,REAC,REAC,REAC,REAC,REAC	Rps9,Rps25,Rps5,Rpl19,Rps24,Rpl14,Rps3a1,Rps20,Rpl28,Rps3,Rpl4,Rps29,Rps21,Rpl37,Rpl18a,Rps8,Rpl30,Rpl18,Rpl11,Rpl26,Rps12,Rpl17,Rps15,Rpl23,Rpl39	0.208
94	query_1	TRUE	7.08143e-21	172	82	25	0.304878	0.145349	REAC:R-MMU-8868773	REAC	rRNA processing in the nucleus and cytosol	8469	1787	REAC:R-MMU-72312	REAC,REAC,REAC,REAC,REAC,REAC,REAC,REAC,REAC,REAC,REAC,REAC,REAC,REAC,REAC,REAC,REAC,REAC,REAC,REAC,REAC,REAC,REAC,REAC,REAC	Rps9,Rps25,Rps5,Rpl19,Rps24,Rpl14,Rps3a1,Rps20,Rpl28,Rps3,Rpl4,Rps29,Rps21,Rpl37,Rpl18a,Rps8,Rpl30,Rpl18,Rpl11,Rpl26,Rps12,Rpl17,Rps15,Rpl23,Rpl39	0.145
95	query_1	TRUE	7.08143e-21	172	82	25	0.304878	0.145349	REAC:R-MMU-6791226	REAC	Major pathway of rRNA processing in the nucleolus and cytosol	8469	833	REAC:R-MMU-8868773	REAC,REAC,REAC,REAC,REAC,REAC,REAC,REAC,REAC,REAC,REAC,REAC,REAC,REAC,REAC,REAC,REAC,REAC,REAC,REAC,REAC,REAC,REAC,REAC,REAC	Rps9,Rps25,Rps5,Rpl19,Rps24,Rpl14,Rps3a1,Rps20,Rpl28,Rps3,Rpl4,Rps29,Rps21,Rpl37,Rpl18a,Rps8,Rpl30,Rpl18,Rpl11,Rpl26,Rps12,Rpl17,Rps15,Rpl23,Rpl39	0.145
96	query_1	TRUE	7.08143e-21	172	82	25	0.304878	0.145349	REAC:R-MMU-72312	REAC	rRNA processing	8469	1786	REAC:R-MMU-8953854	REAC,REAC,REAC,REAC,REAC,REAC,REAC,REAC,REAC,REAC,REAC,REAC,REAC,REAC,REAC,REAC,REAC,REAC,REAC,REAC,REAC,REAC,REAC,REAC,REAC	Rps9,Rps25,Rps5,Rpl19,Rps24,Rpl14,Rps3a1,Rps20,Rpl28,Rps3,Rpl4,Rps29,Rps21,Rpl37,Rpl18a,Rps8,Rpl30,Rpl18,Rpl11,Rpl26,Rps12,Rpl17,Rps15,Rpl23,Rpl39	0.145
97	query_1	TRUE	2.15097e-19	221	82	26	0.317073	0.117647	REAC:R-MMU-72766	REAC	Translation	8469	1672	REAC:R-MMU-392499	REAC,REAC,REAC,REAC,REAC,REAC,REAC,REAC,REAC,REAC,REAC,REAC,REAC,REAC,REAC,REAC,REAC,REAC,REAC,REAC,REAC,REAC,REAC,REAC,REAC,REAC	Rps9,Rps25,Rps5,Rpl19,Rps24,Rpl14,Rps3a1,Rps20,Rpl28,Rps3,Rpl4,Rps29,Eef1a1,Rps21,Rpl37,Rpl18a,Rps8,Rpl30,Rpl18,Rpl11,Rpl26,Rps12,Rpl17,Rps15,Rpl23,Rpl39	0.118
98	query_1	TRUE	7.57762e-14	566	82	31	0.378049	0.0547703	REAC:R-MMU-8953854	REAC	Metabolism of RNA	8469	842	REAC:0000000	REAC,REAC,REAC,REAC,REAC,REAC,REAC,REAC,REAC,REAC,REAC,REAC,REAC,REAC,REAC,REAC,REAC,REAC,REAC,REAC,REAC,REAC,REAC,REAC,REAC,REAC,REAC,REAC,REAC,REAC,REAC	Fam32a,Rps9,Rps25,Rps5,Rpl19,Rps24,Rpl14,Rps3a1,Rps20,Psmb2,Rpl28,Smg1,Rps3,Polr2c,Rpl4,Rps29,Rps21,Rpl37,Rpl18a,Rps8,Srsf11,Rpl30,Rpl18,Rpl11,Rpl26,Rps12,Rpl17,Rps15,Rpl23,Sarnp,Rpl39	0.055
99	query_1	TRUE	1.04122e-11	51	82	12	0.146341	0.235294	REAC:R-MMU-72695	REAC	Formation of the ternary complex, and subsequently, the 43S complex	8469	540	REAC:R-MMU-72737	REAC,REAC,REAC,REAC,REAC,REAC,REAC,REAC,REAC,REAC,REAC,REAC	Rps9,Rps25,Rps5,Rps24,Rps3a1,Rps20,Rps3,Rps29,Rps21,Rps8,Rps12,Rps15	0.235
100	query_1	TRUE	5.54251e-11	58	82	12	0.146341	0.206897	REAC:R-MMU-72702	REAC	Ribosomal scanning and start codon recognition	8469	1363	REAC:R-MMU-72737	REAC,REAC,REAC,REAC,REAC,REAC,REAC,REAC,REAC,REAC,REAC,REAC	Rps9,Rps25,Rps5,Rps24,Rps3a1,Rps20,Rps3,Rps29,Rps21,Rps8,Rps12,Rps15	0.207
101	query_1	TRUE	5.54251e-11	58	82	12	0.146341	0.206897	REAC:R-MMU-72649	REAC	Translation initiation complex formation	8469	1673	REAC:R-MMU-72662	REAC,REAC,REAC,REAC,REAC,REAC,REAC,REAC,REAC,REAC,REAC,REAC	Rps9,Rps25,Rps5,Rps24,Rps3a1,Rps20,Rps3,Rps29,Rps21,Rps8,Rps12,Rps15	0.207
102	query_1	TRUE	6.9043e-11	59	82	12	0.146341	0.20339	REAC:R-MMU-72662	REAC	Activation of the mRNA upon binding of the cap-binding complex and eIFs, and subsequent binding to 43S	8469	72	REAC:R-MMU-72737	REAC,REAC,REAC,REAC,REAC,REAC,REAC,REAC,REAC,REAC,REAC,REAC	Rps9,Rps25,Rps5,Rps24,Rps3a1,Rps20,Rps3,Rps29,Rps21,Rps8,Rps12,Rps15	0.203
103	query_1	TRUE	0.00344416	1654	82	33	0.402439	0.0199516	REAC:R-MMU-392499	REAC	Metabolism of proteins	8469	857	REAC:0000000	REAC,REAC,REAC,REAC,REAC,REAC,REAC,REAC,REAC,REAC,REAC,REAC,REAC,REAC,REAC,REAC,REAC,REAC,REAC,REAC,REAC,REAC,REAC,REAC,REAC,REAC,REAC,REAC,REAC,REAC,REAC,REAC,REAC	Apoe,Rps9,Rps25,Rps5,Rpl19,Socs2,Rps24,Rpl14,Rps3a1,Rps20,Psmb2,Rpl28,Mfge8,Rps3,Rpl4,Rps29,Eef1a1,Rps21,Rpl37,Rpl18a,Penk,Rps8,Usp34,Rpl30,Rpl18,Rpl11,Rpl26,Rps12,Rpl17,Rps15,mt-Atp6,Rpl23,Rpl39	0.02
104	query_1	TRUE	1.81695e-09	14448	143	131	0.916084	0.009067	TF:M00333	TF	Factor: ZF5; motif: NRNGNGCGCGCWN	21700	3938	TF:M00000	TF,TF,TF,TF,TF,TF,TF,TF,TF,TF,TF,TF,TF,TF,TF,TF,TF,TF,TF,TF,TF,TF,TF,TF,TF,TF,TF,TF,TF,TF,TF,TF,TF,TF,TF,TF,TF,TF,TF,TF,TF,TF,TF,TF,TF,TF,TF,TF,TF,TF,TF,TF,TF,TF,TF,TF,TF,TF,TF,TF,TF,TF,TF,TF,TF,TF,TF,TF,TF,TF,TF,TF,TF,TF,TF,TF,TF,TF,TF,TF,TF,TF,TF,TF,TF,TF,TF,TF,TF,TF,TF,TF,TF,TF,TF,TF,TF,TF,TF,TF,TF,TF,TF,TF,TF,TF,TF,TF,TF,TF,TF,TF,TF,TF,TF,TF,TF,TF,TF,TF,TF,TF,TF,TF,TF,TF,TF,TF,TF,TF,TF	Kcnn3,Pfdn5,Celf2,Abhd3,Apoe,Fam32a,Cacna1e,Cacna1b,Pafah1b3,Rps25,Rps5,Taok1,Rpl19,Cacnb4,Fmc1,Arfgef3,Socs2,Srgap1,Nopchap1,Rack1,Supt4a,Nf1,Fos,Vcan,Hcn1,Amacr,Deptor,Ncam2,Nr4a1,Cacna1h,Cox7a2l,Pfdn1,Map3k2,Lcor,Slc18a2,Rps24,Tmem192,Rpl14,Pag1,Zdbf2,Lrrcc1,Ndufb5,Ttc14,Wnt2b,Rps3a1,Lrrc7,Rps20,Psmb2,Ago3,Htra3,Grin2b,Rpl28,Mfge8,Smg1,Rps3,Pak3,Polr2c,Ciao2b,Gpr83,Rpl4,Cpne4,Clasp2,Chmp2a,Zfc…	0.009
105	query_1	TRUE	1.61199e-06	11218	143	109	0.762238	0.00971653	TF:M00333_1	TF	Factor: ZF5; motif: NRNGNGCGCGCWN; match class: 1	21700	3939	TF:M00333	TF,TF,TF,TF,TF,TF,TF,TF,TF,TF,TF,TF,TF,TF,TF,TF,TF,TF,TF,TF,TF,TF,TF,TF,TF,TF,TF,TF,TF,TF,TF,TF,TF,TF,TF,TF,TF,TF,TF,TF,TF,TF,TF,TF,TF,TF,TF,TF,TF,TF,TF,TF,TF,TF,TF,TF,TF,TF,TF,TF,TF,TF,TF,TF,TF,TF,TF,TF,TF,TF,TF,TF,TF,TF,TF,TF,TF,TF,TF,TF,TF,TF,TF,TF,TF,TF,TF,TF,TF,TF,TF,TF,TF,TF,TF,TF,TF,TF,TF,TF,TF,TF,TF,TF,TF,TF,TF,TF,TF	Kcnn3,Pfdn5,Celf2,Abhd3,Apoe,Fam32a,Cacna1e,Cacna1b,Rps25,Rps5,Taok1,Rpl19,Cacnb4,Fmc1,Arfgef3,Socs2,Srgap1,Nopchap1,Rack1,Supt4a,Nf1,Fos,Vcan,Hcn1,Amacr,Deptor,Ncam2,Nr4a1,Cacna1h,Cox7a2l,Pfdn1,Map3k2,Lcor,Slc18a2,Tmem192,Rpl14,Pag1,Zdbf2,Ndufb5,Ttc14,Wnt2b,Rps3a1,Lrrc7,Rps20,Ago3,Htra3,Grin2b,Mfge8,Smg1,Rps3,Pak3,Polr2c,Ciao2b,Chmp2a,Zfc3h1,Atm,Rps29,Ano4,Scai,Vps13c,Shq1,Gmip,Hook3,Ubn2,Rps21,…	0.01
106	query_1	TRUE	1.48893e-05	12079	143	112	0.783217	0.00927229	TF:M00716_1	TF	Factor: ZF5; motif: GSGCGCGR; match class: 1	21700	3937	TF:M00716	TF,TF,TF,TF,TF,TF,TF,TF,TF,TF,TF,TF,TF,TF,TF,TF,TF,TF,TF,TF,TF,TF,TF,TF,TF,TF,TF,TF,TF,TF,TF,TF,TF,TF,TF,TF,TF,TF,TF,TF,TF,TF,TF,TF,TF,TF,TF,TF,TF,TF,TF,TF,TF,TF,TF,TF,TF,TF,TF,TF,TF,TF,TF,TF,TF,TF,TF,TF,TF,TF,TF,TF,TF,TF,TF,TF,TF,TF,TF,TF,TF,TF,TF,TF,TF,TF,TF,TF,TF,TF,TF,TF,TF,TF,TF,TF,TF,TF,TF,TF,TF,TF,TF,TF,TF,TF,TF,TF,TF,TF,TF,TF	Pfdn5,Celf2,Abhd3,Apoe,Fam32a,Rabac1,Cacna1e,Cacna1b,Pafah1b3,Rps9,Rps5,Taok1,Rpl19,Fmc1,Socs2,Srgap1,Nopchap1,Supt4a,Nf1,Fos,Vcan,Hcn1,Amacr,Ncam2,Nr4a1,Cacna1h,Pfdn1,Map3k2,Lcor,Slc18a2,Rps24,Tmem192,Rpl14,Pag1,Zdbf2,Lrrcc1,Ndufb5,Ttc14,Wnt2b,Rps3a1,Lrrc7,Rps20,Ago3,Htra3,Grin2b,Rpl28,Smg1,Rps3,Polr2c,Ciao2b,Gpr83,Rpl4,Cpne4,Chmp2a,Zfc3h1,Atm,Rps29,Scai,Vps13c,Mid1,Shq1,Gmip,Hook3,Eef1a1,Ubn2,R…	0.009
107	query_1	TRUE	4.39313e-05	14864	143	126	0.881119	0.00847686	TF:M00716	TF	Factor: ZF5; motif: GSGCGCGR	21700	3936	TF:M00000	TF,TF,TF,TF,TF,TF,TF,TF,TF,TF,TF,TF,TF,TF,TF,TF,TF,TF,TF,TF,TF,TF,TF,TF,TF,TF,TF,TF,TF,TF,TF,TF,TF,TF,TF,TF,TF,TF,TF,TF,TF,TF,TF,TF,TF,TF,TF,TF,TF,TF,TF,TF,TF,TF,TF,TF,TF,TF,TF,TF,TF,TF,TF,TF,TF,TF,TF,TF,TF,TF,TF,TF,TF,TF,TF,TF,TF,TF,TF,TF,TF,TF,TF,TF,TF,TF,TF,TF,TF,TF,TF,TF,TF,TF,TF,TF,TF,TF,TF,TF,TF,TF,TF,TF,TF,TF,TF,TF,TF,TF,TF,TF,TF,TF,TF,TF,TF,TF,TF,TF,TF,TF,TF,TF,TF,TF	Pfdn5,Celf2,Abhd3,Apoe,Fam32a,Rabac1,Cacna1e,Cacna1b,Pafah1b3,Rps9,Rps5,Taok1,Rpl19,Cacnb4,Fmc1,Socs2,Srgap1,Nopchap1,Rack1,Supt4a,Nf1,Fos,Vcan,Hcn1,Amacr,Ncam2,Nr4a1,Cacna1h,Cox7a2l,Pfdn1,Map3k2,Lcor,Slc18a2,Rps24,Tmem192,Rpl14,Pag1,Zdbf2,Lrrcc1,Ndufb5,Ttc14,Wnt2b,Rps3a1,Lrrc7,Rps20,Psmb2,Ago3,Htra3,Grin2b,Rpl28,Smg1,Rps3,Pak3,Polr2c,Ciao2b,Gpr83,Rpl4,Cpne4,Chmp2a,Zfc3h1,Atm,Rps29,Ano4,Scai,Vps1…	0.008
108	query_1	TRUE	5.42186e-05	8476	143	88	0.615385	0.0103823	TF:M02913	TF	Factor: SP100; motif: NNCGTCGNNTAAWNN	21700	3314	TF:M00000	TF,TF,TF,TF,TF,TF,TF,TF,TF,TF,TF,TF,TF,TF,TF,TF,TF,TF,TF,TF,TF,TF,TF,TF,TF,TF,TF,TF,TF,TF,TF,TF,TF,TF,TF,TF,TF,TF,TF,TF,TF,TF,TF,TF,TF,TF,TF,TF,TF,TF,TF,TF,TF,TF,TF,TF,TF,TF,TF,TF,TF,TF,TF,TF,TF,TF,TF,TF,TF,TF,TF,TF,TF,TF,TF,TF,TF,TF,TF,TF,TF,TF,TF,TF,TF,TF,TF,TF	Pfdn5,Celf2,Abhd3,Cacna1b,Rps9,Rps25,Rpl19,Socs2,Srgap1,Nopchap1,Rack1,Supt4a,Nf1,Fos,Vcan,Hcn1,Amacr,Cacna1h,Map3k2,Lcor,Slc18a2,Rps24,Tmem192,Rpl14,Pag1,Zdbf2,Lrrcc1,Ttc14,Wnt2b,Rps3a1,Lrrc7,Psmb2,Ago3,Htra3,Mfge8,Smg1,Rps3,Polr2c,Ciao2b,Cpne4,Chmp2a,Zfc3h1,Atm,Vps13c,Shq1,Eef1a1,Ubn2,Fndc3b,Myo9a,Gpr26,Adam22,Rpl37,Tbca,Uggt2,Hecw2,Pura,Csrnp3,Rpl18a,Penk,Fam185a,Rps8,Sv2c,Xkr4,Get3,Shisa6,Slc…	0.01
109	query_1	TRUE	6.25845e-05	10647	143	102	0.713287	0.00958016	TF:M10209_1	TF	Factor: E2F-1; motif: GNGGGCGGGRMN; match class: 1	21700	745	TF:M10209	TF,TF,TF,TF,TF,TF,TF,TF,TF,TF,TF,TF,TF,TF,TF,TF,TF,TF,TF,TF,TF,TF,TF,TF,TF,TF,TF,TF,TF,TF,TF,TF,TF,TF,TF,TF,TF,TF,TF,TF,TF,TF,TF,TF,TF,TF,TF,TF,TF,TF,TF,TF,TF,TF,TF,TF,TF,TF,TF,TF,TF,TF,TF,TF,TF,TF,TF,TF,TF,TF,TF,TF,TF,TF,TF,TF,TF,TF,TF,TF,TF,TF,TF,TF,TF,TF,TF,TF,TF,TF,TF,TF,TF,TF,TF,TF,TF,TF,TF,TF,TF,TF	Kcnn3,Pfdn5,Celf2,Apoe,Rabac1,Cacna1e,Cacna1b,Pafah1b3,Rps25,Taok1,Socs2,Srgap1,Nopchap1,Rack1,Supt4a,Nf1,Fos,Vcan,Hcn1,Amacr,Ncam2,Nr4a1,Cacna1h,Cox7a2l,Pfdn1,Map3k2,Lcor,Rps24,Tmem192,Rpl14,Pag1,Zdbf2,Lrrcc1,Wnt2b,Rps3a1,Lrrc7,Rps20,Psmb2,Ago3,Htra3,Grin2b,Mfge8,Smg1,Polr2c,Rpl4,Cpne4,Zfc3h1,Atm,Rps29,Scai,Vps13c,Shq1,Gmip,Hook3,Eef1a1,Ubn2,Rps21,Fndc3b,Myo9a,Gpr26,Adam22,Tet2,Rpl37,Tbca,Uggt2,…	0.01
110	query_1	TRUE	7.48899e-05	16001	143	131	0.916084	0.00818699	TF:M04662	TF	Factor: FOXN4; motif: NNWANNCGWMCGCGTCNNNNMT	21700	1180	TF:M00000	TF,TF,TF,TF,TF,TF,TF,TF,TF,TF,TF,TF,TF,TF,TF,TF,TF,TF,TF,TF,TF,TF,TF,TF,TF,TF,TF,TF,TF,TF,TF,TF,TF,TF,TF,TF,TF,TF,TF,TF,TF,TF,TF,TF,TF,TF,TF,TF,TF,TF,TF,TF,TF,TF,TF,TF,TF,TF,TF,TF,TF,TF,TF,TF,TF,TF,TF,TF,TF,TF,TF,TF,TF,TF,TF,TF,TF,TF,TF,TF,TF,TF,TF,TF,TF,TF,TF,TF,TF,TF,TF,TF,TF,TF,TF,TF,TF,TF,TF,TF,TF,TF,TF,TF,TF,TF,TF,TF,TF,TF,TF,TF,TF,TF,TF,TF,TF,TF,TF,TF,TF,TF,TF,TF,TF,TF,TF,TF,TF,TF,TF	Pfdn5,Celf2,Abhd3,Fam32a,Rabac1,Cacna1e,Cacna1b,Pafah1b3,Rps9,Rps25,Rps5,Tnr,Taok1,Rpl19,Cacnb4,Fmc1,Arfgef3,Socs2,Srgap1,Nopchap1,Rack1,Supt4a,Nf1,Fos,Vcan,Hcn1,Amacr,Deptor,Ncam2,Nr4a1,Cacna1h,Cox7a2l,Pfdn1,Map3k2,Lcor,Rps24,Tmem192,Rpl14,Pag1,Zdbf2,Lrrcc1,Ndufb5,Ttc14,Wnt2b,Rps3a1,Lrrc7,Rps20,Psmb2,Ago3,Htra3,Grin2b,Rpl28,Mfge8,Smg1,Rps3,Polr2c,Ciao2b,Gpr83,Rpl4,Cpne4,Clasp2,Chmp2a,Zfc3h1,Atm,…	0.008
111	query_1	TRUE	7.80264e-05	16229	143	132	0.923077	0.00813359	TF:M01240	TF	Factor: BEN; motif: CAGCGRNV	21700	286	TF:M00000	TF,TF,TF,TF,TF,TF,TF,TF,TF,TF,TF,TF,TF,TF,TF,TF,TF,TF,TF,TF,TF,TF,TF,TF,TF,TF,TF,TF,TF,TF,TF,TF,TF,TF,TF,TF,TF,TF,TF,TF,TF,TF,TF,TF,TF,TF,TF,TF,TF,TF,TF,TF,TF,TF,TF,TF,TF,TF,TF,TF,TF,TF,TF,TF,TF,TF,TF,TF,TF,TF,TF,TF,TF,TF,TF,TF,TF,TF,TF,TF,TF,TF,TF,TF,TF,TF,TF,TF,TF,TF,TF,TF,TF,TF,TF,TF,TF,TF,TF,TF,TF,TF,TF,TF,TF,TF,TF,TF,TF,TF,TF,TF,TF,TF,TF,TF,TF,TF,TF,TF,TF,TF,TF,TF,TF,TF,TF,TF,TF,TF,TF,TF	Kcnn3,Celf2,Abhd3,Apoe,Rabac1,Cacna1e,Cacna1b,Pafah1b3,Rps9,Rps25,Rps5,Taok1,Rpl19,Fmc1,Arfgef3,Socs2,Srgap1,Nopchap1,Rack1,Supt4a,Nf1,Fos,Vcan,Hcn1,Amacr,Ncam2,Nr4a1,Cacna1h,Cox7a2l,Pfdn1,Map3k2,Lcor,Slc18a2,Rps24,Tmem192,Rpl14,Pag1,Zdbf2,Lrrcc1,Ndufb5,Ttc14,Wnt2b,Rps3a1,Lrrc7,Rps20,Psmb2,Ago3,Htra3,Grin2b,Rpl28,Mfge8,Smg1,Rps3,Pak3,Dcx,Polr2c,Ciao2b,Gpr83,Rpl4,Cpne4,Clasp2,Chmp2a,Zfc3h1,Atm,Rps…	0.008
112	query_1	TRUE	0.00013127	12793	143	114	0.797203	0.00891112	TF:M04662_1	TF	Factor: FOXN4; motif: NNWANNCGWMCGCGTCNNNNMT; match class: 1	21700	1181	TF:M04662	TF,TF,TF,TF,TF,TF,TF,TF,TF,TF,TF,TF,TF,TF,TF,TF,TF,TF,TF,TF,TF,TF,TF,TF,TF,TF,TF,TF,TF,TF,TF,TF,TF,TF,TF,TF,TF,TF,TF,TF,TF,TF,TF,TF,TF,TF,TF,TF,TF,TF,TF,TF,TF,TF,TF,TF,TF,TF,TF,TF,TF,TF,TF,TF,TF,TF,TF,TF,TF,TF,TF,TF,TF,TF,TF,TF,TF,TF,TF,TF,TF,TF,TF,TF,TF,TF,TF,TF,TF,TF,TF,TF,TF,TF,TF,TF,TF,TF,TF,TF,TF,TF,TF,TF,TF,TF,TF,TF,TF,TF,TF,TF,TF,TF	Pfdn5,Celf2,Abhd3,Fam32a,Cacna1e,Cacna1b,Pafah1b3,Rps25,Rps5,Taok1,Rpl19,Fmc1,Arfgef3,Socs2,Srgap1,Nopchap1,Rack1,Supt4a,Nf1,Fos,Vcan,Hcn1,Amacr,Ncam2,Nr4a1,Cacna1h,Cox7a2l,Pfdn1,Map3k2,Lcor,Rps24,Tmem192,Rpl14,Zdbf2,Lrrcc1,Ndufb5,Ttc14,Wnt2b,Rps3a1,Lrrc7,Rps20,Psmb2,Ago3,Htra3,Grin2b,Rpl28,Mfge8,Smg1,Rps3,Polr2c,Ciao2b,Gpr83,Rpl4,Chmp2a,Zfc3h1,Atm,Rps29,Scai,Shq1,Gmip,Hook3,Eef1a1,Pcp4l1,Ubn2,Rp…	0.009
113	query_1	TRUE	0.000206835	12007	143	109	0.762238	0.00907804	TF:M01240_1	TF	Factor: BEN; motif: CAGCGRNV; match class: 1	21700	287	TF:M01240	TF,TF,TF,TF,TF,TF,TF,TF,TF,TF,TF,TF,TF,TF,TF,TF,TF,TF,TF,TF,TF,TF,TF,TF,TF,TF,TF,TF,TF,TF,TF,TF,TF,TF,TF,TF,TF,TF,TF,TF,TF,TF,TF,TF,TF,TF,TF,TF,TF,TF,TF,TF,TF,TF,TF,TF,TF,TF,TF,TF,TF,TF,TF,TF,TF,TF,TF,TF,TF,TF,TF,TF,TF,TF,TF,TF,TF,TF,TF,TF,TF,TF,TF,TF,TF,TF,TF,TF,TF,TF,TF,TF,TF,TF,TF,TF,TF,TF,TF,TF,TF,TF,TF,TF,TF,TF,TF,TF,TF	Kcnn3,Celf2,Abhd3,Apoe,Rabac1,Cacna1e,Cacna1b,Pafah1b3,Rps9,Rps5,Rpl19,Fmc1,Arfgef3,Socs2,Srgap1,Nopchap1,Rack1,Supt4a,Nf1,Fos,Vcan,Hcn1,Ncam2,Nr4a1,Cacna1h,Map3k2,Lcor,Slc18a2,Rps24,Tmem192,Rpl14,Pag1,Zdbf2,Ndufb5,Ttc14,Rps3a1,Rps20,Ago3,Htra3,Grin2b,Rpl28,Mfge8,Smg1,Rps3,Pak3,Polr2c,Ciao2b,Rpl4,Cpne4,Chmp2a,Zfc3h1,Atm,Rps29,Ano4,Scai,Vps13c,Mid1,Shq1,Gmip,Hook3,Eef1a1,Pcp4l1,Ubn2,Rps21,Fndc3b,G…	0.009
114	query_1	TRUE	0.000346193	9528	143	93	0.65035	0.00976071	TF:M02933	TF	Factor: ZF5; motif: GYCGCGCARNGCNN	21700	3950	TF:M00000	TF,TF,TF,TF,TF,TF,TF,TF,TF,TF,TF,TF,TF,TF,TF,TF,TF,TF,TF,TF,TF,TF,TF,TF,TF,TF,TF,TF,TF,TF,TF,TF,TF,TF,TF,TF,TF,TF,TF,TF,TF,TF,TF,TF,TF,TF,TF,TF,TF,TF,TF,TF,TF,TF,TF,TF,TF,TF,TF,TF,TF,TF,TF,TF,TF,TF,TF,TF,TF,TF,TF,TF,TF,TF,TF,TF,TF,TF,TF,TF,TF,TF,TF,TF,TF,TF,TF,TF,TF,TF,TF,TF,TF	Pfdn5,Celf2,Rabac1,Cacna1e,Cacna1b,Pafah1b3,Rps25,Rps5,Taok1,Rpl19,Arfgef3,Socs2,Srgap1,Supt4a,Vcan,Hcn1,Amacr,Ncam2,Nr4a1,Cacna1h,Map3k2,Lcor,Rps24,Tmem192,Rpl14,Pag1,Zdbf2,Lrrcc1,Ttc14,Wnt2b,Rps3a1,Lrrc7,Rps20,Htra3,Grin2b,Mfge8,Smg1,Rps3,Polr2c,Ciao2b,Gpr83,Rpl4,Chmp2a,Zfc3h1,Rps29,Scai,Vps13c,Mid1,Shq1,Gmip,Hook3,Eef1a1,Ubn2,Fndc3b,Myo9a,Gpr26,Tet2,Rpl37,Tbca,Uggt2,Hecw2,Pura,Rpl18a,Fam185a,R…	0.01
115	query_1	TRUE	0.00102689	14247	143	120	0.839161	0.00842283	TF:M10209	TF	Factor: E2F-1; motif: GNGGGCGGGRMN	21700	744	TF:M00000	TF,TF,TF,TF,TF,TF,TF,TF,TF,TF,TF,TF,TF,TF,TF,TF,TF,TF,TF,TF,TF,TF,TF,TF,TF,TF,TF,TF,TF,TF,TF,TF,TF,TF,TF,TF,TF,TF,TF,TF,TF,TF,TF,TF,TF,TF,TF,TF,TF,TF,TF,TF,TF,TF,TF,TF,TF,TF,TF,TF,TF,TF,TF,TF,TF,TF,TF,TF,TF,TF,TF,TF,TF,TF,TF,TF,TF,TF,TF,TF,TF,TF,TF,TF,TF,TF,TF,TF,TF,TF,TF,TF,TF,TF,TF,TF,TF,TF,TF,TF,TF,TF,TF,TF,TF,TF,TF,TF,TF,TF,TF,TF,TF,TF,TF,TF,TF,TF,TF,TF	Kcnn3,Pfdn5,Celf2,Abhd3,Apoe,Rabac1,Cacna1e,Cacna1b,Pafah1b3,Rps9,Rps25,Taok1,Fmc1,Arfgef3,Socs2,Srgap1,Nopchap1,Rack1,Supt4a,Nf1,Fos,Vcan,Hcn1,Amacr,Ncam2,Nr4a1,Cacna1h,Cox7a2l,Pfdn1,Map3k2,Lcor,Rps24,Tmem192,Rpl14,Pag1,Zdbf2,Lrrcc1,Ttc14,Wnt2b,Rps3a1,Lrrc7,Rps20,Psmb2,Ago3,Htra3,Grin2b,Rpl28,Mfge8,Smg1,Rps3,Pak3,Polr2c,Ciao2b,Rpl4,Cpne4,Chmp2a,Zfc3h1,Atm,Rps29,Ano4,Scai,Vps13c,Shq1,Gmip,Hook3,E…	0.008
116	query_1	TRUE	0.00103785	6018	143	67	0.468531	0.0111333	TF:M01984	TF	Factor: ERF; motif: ACCGGAARTN	21700	968	TF:M00000	TF,TF,TF,TF,TF,TF,TF,TF,TF,TF,TF,TF,TF,TF,TF,TF,TF,TF,TF,TF,TF,TF,TF,TF,TF,TF,TF,TF,TF,TF,TF,TF,TF,TF,TF,TF,TF,TF,TF,TF,TF,TF,TF,TF,TF,TF,TF,TF,TF,TF,TF,TF,TF,TF,TF,TF,TF,TF,TF,TF,TF,TF,TF,TF,TF,TF,TF	Kcnn3,Fam32a,Rabac1,Cacna1b,Rps25,Rps5,Taok1,Rpl19,Nopchap1,Rack1,Supt4a,Nf1,Amacr,Ncam2,Cox7a2l,Map3k2,Rpl14,Ndufb5,Ttc14,Rps3a1,Psmb2,Ago3,Rpl28,Mfge8,Rps3,Polr2c,Ciao2b,Clasp2,Chmp2a,Atm,Rps29,Ano4,Mid1,Shq1,Gmip,Ubn2,Rps21,Tet2,Rpl37,Tbca,Uggt2,Pura,Rpl18a,Rps8,Tnrc6b,Sv2c,Xkr4,Get3,Zfp182,Srsf11,R3hdm1,Gstm1,Rpl30,Rpl11,Rpl26,Rps12,Rps15,Uqcrh,mt-Atp6,Rpl23,Sarnp,Tm2d3,Rpl39,Kcnb2,Rpl41,Tmem…	0.011
117	query_1	TRUE	0.00249647	13504	143	115	0.804196	0.008516	TF:M10276	TF	Factor: Kaiso; motif: SARNYCTCGCGAGAN	21700	3902	TF:M00000	TF,TF,TF,TF,TF,TF,TF,TF,TF,TF,TF,TF,TF,TF,TF,TF,TF,TF,TF,TF,TF,TF,TF,TF,TF,TF,TF,TF,TF,TF,TF,TF,TF,TF,TF,TF,TF,TF,TF,TF,TF,TF,TF,TF,TF,TF,TF,TF,TF,TF,TF,TF,TF,TF,TF,TF,TF,TF,TF,TF,TF,TF,TF,TF,TF,TF,TF,TF,TF,TF,TF,TF,TF,TF,TF,TF,TF,TF,TF,TF,TF,TF,TF,TF,TF,TF,TF,TF,TF,TF,TF,TF,TF,TF,TF,TF,TF,TF,TF,TF,TF,TF,TF,TF,TF,TF,TF,TF,TF,TF,TF,TF,TF,TF,TF	Pfdn5,Celf2,Apoe,Rabac1,Cacna1b,Pafah1b3,Rps9,Rps25,Tnr,Taok1,Rpl19,Fmc1,Arfgef3,Socs2,Srgap1,Nopchap1,Rack1,Supt4a,Nf1,Fos,Vcan,Hcn1,Amacr,Ncam2,Nr4a1,Cacna1h,Pfdn1,Map3k2,Lcor,Slc18a2,Rps24,Rpl14,Pag1,Zdbf2,Ndufb5,Ttc14,Rps3a1,Lrrc7,Rps20,Psmb2,Ago3,Htra3,Grin2b,Rpl28,Mfge8,Smg1,Rps3,Pak3,Polr2c,Ciao2b,Rpl4,Cpne4,Chmp2a,Zfc3h1,Atm,Rps29,Ano4,Scai,Vps13c,Shq1,Gmip,Hook3,Eef1a1,Ubn2,Rps21,Fndc3b,…	0.009
118	query_1	TRUE	0.00569264	7251	143	74	0.517483	0.0102055	TF:M05494	TF	Factor: Egr-2; motif: GCGTGGGCGG	21700	858	TF:M00000	TF,TF,TF,TF,TF,TF,TF,TF,TF,TF,TF,TF,TF,TF,TF,TF,TF,TF,TF,TF,TF,TF,TF,TF,TF,TF,TF,TF,TF,TF,TF,TF,TF,TF,TF,TF,TF,TF,TF,TF,TF,TF,TF,TF,TF,TF,TF,TF,TF,TF,TF,TF,TF,TF,TF,TF,TF,TF,TF,TF,TF,TF,TF,TF,TF,TF,TF,TF,TF,TF,TF,TF,TF,TF	Celf2,Rabac1,Cacna1e,Cacna1b,Rps25,Fmc1,Nopchap1,Nf1,Vcan,Ncam2,Nr4a1,Cacna1h,Cox7a2l,Pfdn1,Map3k2,Lcor,Slc18a2,Rpl14,Pag1,Zdbf2,Ndufb5,Ttc14,Wnt2b,Rps3a1,Lrrc7,Rps20,Htra3,Rps3,Polr2c,Ciao2b,Gpr83,Rpl4,Zfc3h1,Rps29,Scai,Mid1,Shq1,Hook3,Eef1a1,Rps21,Fndc3b,Myo9a,Adam22,Tet2,Rpl37,Tbca,Uggt2,Hecw2,Pura,Rpl18a,Penk,Tnrc6b,Xkr4,Shisa6,Tmem245,Srsf11,Kcnq3,Usp34,Rpl18,Ntrk3,Kcnh7,Zic2,Rps12,Rpl17,Kcn…	0.01
119	query_1	TRUE	0.00784986	10412	143	95	0.664336	0.00912409	TF:M01993	TF	Factor: TEL1; motif: CNCGGAANNN	21700	3718	TF:M00000	TF,TF,TF,TF,TF,TF,TF,TF,TF,TF,TF,TF,TF,TF,TF,TF,TF,TF,TF,TF,TF,TF,TF,TF,TF,TF,TF,TF,TF,TF,TF,TF,TF,TF,TF,TF,TF,TF,TF,TF,TF,TF,TF,TF,TF,TF,TF,TF,TF,TF,TF,TF,TF,TF,TF,TF,TF,TF,TF,TF,TF,TF,TF,TF,TF,TF,TF,TF,TF,TF,TF,TF,TF,TF,TF,TF,TF,TF,TF,TF,TF,TF,TF,TF,TF,TF,TF,TF,TF,TF,TF,TF,TF,TF,TF	Abhd3,Fam32a,Rabac1,Rps25,Rps5,Taok1,Rpl19,Fmc1,Socs2,Srgap1,Nopchap1,Rack1,Supt4a,Nf1,Fos,Vcan,Ncam2,Nr4a1,Cacna1h,Cox7a2l,Map3k2,Lcor,Rps24,Tmem192,Pag1,Zdbf2,Ndufb5,Ttc14,Rps3a1,Lrrc7,Rps20,Psmb2,Ago3,Grin2b,Rpl28,Mfge8,Smg1,Rps3,Polr2c,Ciao2b,Rpl4,Cpne4,Clasp2,Chmp2a,Zfc3h1,Atm,Rps29,Ano4,Mid1,Shq1,Gmip,Hook3,Eef1a1,Pcp4l1,Ubn2,Rps21,Fndc3b,Myo9a,Gpr26,Tet2,Rpl37,Tbca,Uggt2,Pura,Csrnp3,Penk,R…	0.009
120	query_1	TRUE	0.00881749	10749	143	97	0.678322	0.0090241	TF:M01660	TF	Factor: GABP-alpha; motif: CTTCCK	21700	1258	TF:M00000	TF,TF,TF,TF,TF,TF,TF,TF,TF,TF,TF,TF,TF,TF,TF,TF,TF,TF,TF,TF,TF,TF,TF,TF,TF,TF,TF,TF,TF,TF,TF,TF,TF,TF,TF,TF,TF,TF,TF,TF,TF,TF,TF,TF,TF,TF,TF,TF,TF,TF,TF,TF,TF,TF,TF,TF,TF,TF,TF,TF,TF,TF,TF,TF,TF,TF,TF,TF,TF,TF,TF,TF,TF,TF,TF,TF,TF,TF,TF,TF,TF,TF,TF,TF,TF,TF,TF,TF,TF,TF,TF,TF,TF,TF,TF,TF,TF	Kcnn3,Abhd3,Apoe,Fam32a,Rabac1,Cacna1b,Pafah1b3,Rps25,Rps5,Tnr,Taok1,Rpl19,Arfgef3,Srgap1,Nopchap1,Rack1,Supt4a,Nf1,Fos,Vcan,Amacr,Ncam2,Nr4a1,Cacna1h,Cox7a2l,Map3k2,Rps24,Rpl14,Zdbf2,Lrrcc1,Ndufb5,Ttc14,Wnt2b,Rps3a1,Psmb2,Ago3,Rpl28,Mfge8,Rps3,Polr2c,Ciao2b,Rpl4,Clasp2,Chmp2a,Zfc3h1,Atm,Rps29,Ano4,Mid1,Shq1,Gmip,Hook3,Eef1a1,Pcp4l1,Ubn2,Rps21,Fndc3b,Tet2,Rpl37,Tbca,Uggt2,Pura,Csrnp3,Rpl18a,Penk,…	0.009
121	query_1	TRUE	0.011449	5744	143	62	0.433566	0.0107939	TF:M01820	TF	Factor: CREM; motif: TGACGTCASYN	21700	596	TF:M00000	TF,TF,TF,TF,TF,TF,TF,TF,TF,TF,TF,TF,TF,TF,TF,TF,TF,TF,TF,TF,TF,TF,TF,TF,TF,TF,TF,TF,TF,TF,TF,TF,TF,TF,TF,TF,TF,TF,TF,TF,TF,TF,TF,TF,TF,TF,TF,TF,TF,TF,TF,TF,TF,TF,TF,TF,TF,TF,TF,TF,TF,TF	Kcnn3,Cacna1b,Rps9,Rps25,Rps5,Tnr,Fmc1,Arfgef3,Socs2,Nopchap1,Nf1,Fos,Amacr,Slc18a2,Rps24,Tmem192,Pag1,Zdbf2,Lrrcc1,Ndufb5,Rps3a1,Psmb2,Ago3,Pak3,Polr2c,Ciao2b,Rpl4,Cpne4,Clasp2,Chmp2a,Zfc3h1,Rps29,Vps13c,Shq1,Hook3,Eef1a1,Pcp4l1,Ubn2,Rpl37,Uggt2,Hecw2,Pura,Rpl18a,Shisa6,Zfp182,R3hdm1,Usp34,Nsd2,Gstm1,Rpl30,Rpl18,Ntrk3,Kcnh7,Rpl26,Rps12,Rpl17,Rpl23,Nbeal1,Zfp950,Sarnp,Rpl41,Tmem179b	0.011
122	query_1	TRUE	0.0136755	3056	143	40	0.27972	0.013089	TF:M02913_1	TF	Factor: SP100; motif: NNCGTCGNNTAAWNN; match class: 1	21700	3315	TF:M02913	TF,TF,TF,TF,TF,TF,TF,TF,TF,TF,TF,TF,TF,TF,TF,TF,TF,TF,TF,TF,TF,TF,TF,TF,TF,TF,TF,TF,TF,TF,TF,TF,TF,TF,TF,TF,TF,TF,TF,TF	Abhd3,Cacna1b,Rps25,Socs2,Srgap1,Supt4a,Hcn1,Cacna1h,Lcor,Rps24,Rpl14,Pag1,Zdbf2,Lrrcc1,Ttc14,Rps3a1,Smg1,Polr2c,Cpne4,Chmp2a,Zfc3h1,Atm,Eef1a1,Adam22,Rpl37,Tbca,Uggt2,Hecw2,Csrnp3,Rps8,Shisa6,Zfp182,R3hdm1,Rpl30,Ntrk3,Kcnh7,Rpl26,Zic2,Rps12,Pcdhgb4	0.013
123	query_1	TRUE	0.0140084	4002	143	48	0.335664	0.011994	TF:M10247	TF	Factor: GABP-alpha; motif: GGNRCCGGAAGTGN	21700	1256	TF:M00000	TF,TF,TF,TF,TF,TF,TF,TF,TF,TF,TF,TF,TF,TF,TF,TF,TF,TF,TF,TF,TF,TF,TF,TF,TF,TF,TF,TF,TF,TF,TF,TF,TF,TF,TF,TF,TF,TF,TF,TF,TF,TF,TF,TF,TF,TF,TF,TF	Fam32a,Rps25,Rps5,Taok1,Rpl19,Nopchap1,Supt4a,Nf1,Cox7a2l,Map3k2,Ndufb5,Ttc14,Rps3a1,Ago3,Rpl28,Rps3,Polr2c,Ciao2b,Chmp2a,Atm,Mid1,Shq1,Gmip,Ubn2,Rps21,Tet2,Rpl37,Tbca,Uggt2,Rps8,Tnrc6b,Get3,Zfp182,Srsf11,R3hdm1,Usp34,Gstm1,Rpl30,Rpl11,Rpl26,Rps12,Uqcrh,Tm2d3,Rpl39,Kcnb2,Rpl41,Tmem223,Tmem179b	0.012
124	query_1	TRUE	0.0174233	2636	143	36	0.251748	0.0136571	TF:M01985	TF	Factor: ERG; motif: ACCGGAARYN	21700	972	TF:M00000	TF,TF,TF,TF,TF,TF,TF,TF,TF,TF,TF,TF,TF,TF,TF,TF,TF,TF,TF,TF,TF,TF,TF,TF,TF,TF,TF,TF,TF,TF,TF,TF,TF,TF,TF,TF	Fam32a,Rps5,Taok1,Rpl19,Nopchap1,Rack1,Supt4a,Nf1,Rpl14,Ndufb5,Ago3,Rpl28,Polr2c,Ciao2b,Atm,Shq1,Rps21,Tet2,Rpl37,Tbca,Uggt2,Rpl18a,Rps8,Get3,Srsf11,R3hdm1,Gstm1,Rpl30,Rpl11,Rpl26,Uqcrh,Rpl23,Rpl39,Kcnb2,Rpl41,Tmem179b	0.014
125	query_1	TRUE	0.0216261	1317	143	23	0.160839	0.0174639	TF:M01598_1	TF	Factor: ZBED6; motif: NRRGCTCGCCNN; match class: 1	21700	3885	TF:M01598	TF,TF,TF,TF,TF,TF,TF,TF,TF,TF,TF,TF,TF,TF,TF,TF,TF,TF,TF,TF,TF,TF,TF	Celf2,Abhd3,Srgap1,Nf1,Ncam2,Cacna1h,Lcor,Rpl14,Ttc14,Rps3a1,Lrrc7,Ago3,Ubn2,Fndc3b,Uggt2,Hecw2,Pura,Sv2c,Xkr4,R3hdm1,Kcnq3,Ntrk3,Uqcrh	0.017
126	query_1	TRUE	0.0227172	7933	143	77	0.538462	0.00970629	TF:M10212	TF	Factor: E2F-7; motif: GRGGCGGGAANNN	21700	782	TF:M00000	TF,TF,TF,TF,TF,TF,TF,TF,TF,TF,TF,TF,TF,TF,TF,TF,TF,TF,TF,TF,TF,TF,TF,TF,TF,TF,TF,TF,TF,TF,TF,TF,TF,TF,TF,TF,TF,TF,TF,TF,TF,TF,TF,TF,TF,TF,TF,TF,TF,TF,TF,TF,TF,TF,TF,TF,TF,TF,TF,TF,TF,TF,TF,TF,TF,TF,TF,TF,TF,TF,TF,TF,TF,TF,TF,TF,TF	Pfdn5,Celf2,Apoe,Cacna1b,Pafah1b3,Rps25,Socs2,Rack1,Supt4a,Fos,Vcan,Hcn1,Ncam2,Nr4a1,Cacna1h,Cox7a2l,Pfdn1,Lcor,Rpl14,Pag1,Ttc14,Wnt2b,Rps3a1,Lrrc7,Rps20,Psmb2,Ago3,Grin2b,Rpl28,Mfge8,Smg1,Rps3,Ciao2b,Rpl4,Cpne4,Chmp2a,Atm,Vps13c,Shq1,Ubn2,Rps21,Fndc3b,Myo9a,Tet2,Tbca,Uggt2,Hecw2,Rpl18a,Tnrc6b,Sv2c,Xkr4,Shisa6,Tmem245,Srsf11,Nkain3,R3hdm1,Kcnq3,Usp34,Gstm1,Rpl18,Rpl11,Kcnh7,Rpl26,Zic2,Rps12,Kcnma…	0.01
127	query_1	TRUE	0.0228774	5337	143	58	0.405594	0.0108675	TF:M00114	TF	Factor: Tax/CREB; motif: GGGGGTTGACGYANA	21700	3556	TF:M00000	TF,TF,TF,TF,TF,TF,TF,TF,TF,TF,TF,TF,TF,TF,TF,TF,TF,TF,TF,TF,TF,TF,TF,TF,TF,TF,TF,TF,TF,TF,TF,TF,TF,TF,TF,TF,TF,TF,TF,TF,TF,TF,TF,TF,TF,TF,TF,TF,TF,TF,TF,TF,TF,TF,TF,TF,TF,TF	Rabac1,Cacna1e,Cacna1b,Pafah1b3,Rps9,Rps25,Rps5,Tnr,Taok1,Cacnb4,Fmc1,Arfgef3,Socs2,Nf1,Fos,Rps24,Tmem192,Pag1,Psmb2,Ago3,Polr2c,Zfc3h1,Vps13c,Hook3,Eef1a1,Pcp4l1,Ubn2,Fndc3b,Myo9a,Rpl37,Tbca,Uggt2,Hecw2,Pura,Rpl18a,Penk,Tnrc6b,Sv2c,Get3,R3hdm1,Kcnq3,Usp34,Gstm1,Rpl30,Rpl18,Ntrk3,Kcnh7,Rpl26,Zic2,Rps12,Rpl17,Nbeal1,Zfp950,Rpl39,Gm14399,Rpl41,Pcdhgb4,Tmem179b	0.011
128	query_1	TRUE	0.0261551	11131	143	98	0.685315	0.00880424	TF:M07991_1	TF	Factor: Hes1; motif: NNCACGYGNN; match class: 1	21700	1469	TF:M07991	TF,TF,TF,TF,TF,TF,TF,TF,TF,TF,TF,TF,TF,TF,TF,TF,TF,TF,TF,TF,TF,TF,TF,TF,TF,TF,TF,TF,TF,TF,TF,TF,TF,TF,TF,TF,TF,TF,TF,TF,TF,TF,TF,TF,TF,TF,TF,TF,TF,TF,TF,TF,TF,TF,TF,TF,TF,TF,TF,TF,TF,TF,TF,TF,TF,TF,TF,TF,TF,TF,TF,TF,TF,TF,TF,TF,TF,TF,TF,TF,TF,TF,TF,TF,TF,TF,TF,TF,TF,TF,TF,TF,TF,TF,TF,TF,TF,TF	Pfdn5,Celf2,Fam32a,Rabac1,Cacna1b,Pafah1b3,Rps9,Rps25,Rps5,Tnr,Taok1,Rpl19,Fmc1,Arfgef3,Socs2,Srgap1,Nopchap1,Rack1,Supt4a,Fos,Amacr,Ncam2,Nr4a1,Cacna1h,Map3k2,Lcor,Rps24,Tmem192,Rpl14,Pag1,Zdbf2,Lrrcc1,Ndufb5,Wnt2b,Rps3a1,Lrrc7,Rps20,Psmb2,Ago3,Grin2b,Rpl28,Mfge8,Smg1,Ciao2b,Gpr83,Cpne4,Chmp2a,Atm,Rps29,Ano4,Vps13c,Shq1,Gmip,Hook3,Eef1a1,Rps21,Fndc3b,Myo9a,Gpr26,Adam22,Tet2,Rpl37,Uggt2,Hecw2,Rpl…	0.009
129	query_1	TRUE	0.027552	14701	143	119	0.832168	0.00809469	TF:M01981	TF	Factor: ELK-1; motif: ACCGGAWRTN	21700	930	TF:M00000	TF,TF,TF,TF,TF,TF,TF,TF,TF,TF,TF,TF,TF,TF,TF,TF,TF,TF,TF,TF,TF,TF,TF,TF,TF,TF,TF,TF,TF,TF,TF,TF,TF,TF,TF,TF,TF,TF,TF,TF,TF,TF,TF,TF,TF,TF,TF,TF,TF,TF,TF,TF,TF,TF,TF,TF,TF,TF,TF,TF,TF,TF,TF,TF,TF,TF,TF,TF,TF,TF,TF,TF,TF,TF,TF,TF,TF,TF,TF,TF,TF,TF,TF,TF,TF,TF,TF,TF,TF,TF,TF,TF,TF,TF,TF,TF,TF,TF,TF,TF,TF,TF,TF,TF,TF,TF,TF,TF,TF,TF,TF,TF,TF,TF,TF,TF,TF,TF,TF	Kcnn3,Pfdn5,Celf2,Fam32a,Rabac1,Cacna1e,Cacna1b,Pafah1b3,Rps9,Rps25,Rps5,Taok1,Rpl19,Socs2,Srgap1,Nopchap1,Rack1,Supt4a,Nf1,Fos,Vcan,Amacr,Ncam2,Nr4a1,Cox7a2l,Pfdn1,Map3k2,Lcor,Slc18a2,Rps24,Tmem192,Rpl14,Pag1,Zdbf2,Ndufb5,Ttc14,Rps3a1,Lrrc7,Rps20,Psmb2,Ago3,Grin2b,Rpl28,Mfge8,Smg1,Rps3,Polr2c,Ciao2b,Gpr83,Rpl4,Cpne4,Clasp2,Chmp2a,Zfc3h1,Atm,Rps29,Ano4,Scai,Vps13c,Mid1,Shq1,Gmip,Hook3,Eef1a1,Pcp4…	0.008
130	query_1	TRUE	0.0290975	2367	143	33	0.230769	0.0139417	TF:M01977_1	TF	Factor: ESE-1; motif: NSMGGAARYN; match class: 1	21700	1007	TF:M01977	TF,TF,TF,TF,TF,TF,TF,TF,TF,TF,TF,TF,TF,TF,TF,TF,TF,TF,TF,TF,TF,TF,TF,TF,TF,TF,TF,TF,TF,TF,TF,TF,TF	Fam32a,Rps25,Rps5,Nopchap1,Rack1,Supt4a,Ncam2,Tmem192,Ttc14,Ago3,Rpl28,Rps3,Ciao2b,Chmp2a,Atm,Rps29,Shq1,Gmip,Hook3,Ubn2,Rps21,Rpl37,Csrnp3,Tnrc6b,R3hdm1,Rpl30,Rpl11,Rpl26,Sarnp,Tm2d3,Rpl41,Tmem223,Tmem179b	0.014
131	query_1	TRUE	0.0326306	3170	143	40	0.27972	0.0126183	TF:M13378	TF	Factor: Zbtb2; motif: ACCGGAAGTG	21700	3900	TF:M00000	TF,TF,TF,TF,TF,TF,TF,TF,TF,TF,TF,TF,TF,TF,TF,TF,TF,TF,TF,TF,TF,TF,TF,TF,TF,TF,TF,TF,TF,TF,TF,TF,TF,TF,TF,TF,TF,TF,TF,TF	Fam32a,Rps5,Taok1,Rpl19,Nopchap1,Supt4a,Nf1,Cox7a2l,Rpl14,Ndufb5,Ttc14,Rps3a1,Ago3,Rpl28,Polr2c,Chmp2a,Atm,Shq1,Gmip,Rps21,Tet2,Rpl37,Tbca,Uggt2,Rpl18a,Rps8,Get3,Srsf11,R3hdm1,Usp34,Rpl30,Rpl11,Rpl26,Uqcrh,Rpl23,Tm2d3,Rpl39,Kcnb2,Rpl41,Tmem179b	0.013
132	query_1	TRUE	0.0358218	10568	143	94	0.657343	0.00889478	TF:M07380	TF	Factor: E2F-4; motif: NTTTCSCGCC	21700	776	TF:M00000	TF,TF,TF,TF,TF,TF,TF,TF,TF,TF,TF,TF,TF,TF,TF,TF,TF,TF,TF,TF,TF,TF,TF,TF,TF,TF,TF,TF,TF,TF,TF,TF,TF,TF,TF,TF,TF,TF,TF,TF,TF,TF,TF,TF,TF,TF,TF,TF,TF,TF,TF,TF,TF,TF,TF,TF,TF,TF,TF,TF,TF,TF,TF,TF,TF,TF,TF,TF,TF,TF,TF,TF,TF,TF,TF,TF,TF,TF,TF,TF,TF,TF,TF,TF,TF,TF,TF,TF,TF,TF,TF,TF,TF,TF	Kcnn3,Pfdn5,Celf2,Apoe,Rabac1,Cacna1b,Pafah1b3,Rps9,Taok1,Socs2,Srgap1,Nopchap1,Rack1,Supt4a,Fos,Vcan,Hcn1,Deptor,Ncam2,Nr4a1,Cacna1h,Cox7a2l,Pfdn1,Lcor,Rpl14,Pag1,Ndufb5,Ttc14,Wnt2b,Rps3a1,Lrrc7,Rps20,Psmb2,Htra3,Grin2b,Rpl28,Mfge8,Smg1,Rps3,Polr2c,Ciao2b,Gpr83,Cpne4,Chmp2a,Zfc3h1,Atm,Scai,Vps13c,Mid1,Shq1,Gmip,Ubn2,Rps21,Fndc3b,Myo9a,Adam22,Tet2,Tbca,Uggt2,Hecw2,Pura,Rpl18a,Penk,Fam185a,Tnrc6b,…	0.009
133	query_1	TRUE	0.0362026	2953	143	38	0.265734	0.0128683	TF:M03791	TF	Factor: GABPalpha_GABPbeta; motif: CTTCCKGY	21700	1252	TF:M00000	TF,TF,TF,TF,TF,TF,TF,TF,TF,TF,TF,TF,TF,TF,TF,TF,TF,TF,TF,TF,TF,TF,TF,TF,TF,TF,TF,TF,TF,TF,TF,TF,TF,TF,TF,TF,TF,TF	Fam32a,Rps5,Taok1,Rpl19,Nopchap1,Supt4a,Nf1,Rpl14,Rps3a1,Ago3,Rpl28,Polr2c,Chmp2a,Zfc3h1,Atm,Rps29,Shq1,Rps21,Rpl37,Tbca,Uggt2,Rpl18a,Penk,Rps8,Get3,Srsf11,R3hdm1,Usp34,Gstm1,Rpl30,Rpl11,Rpl26,Uqcrh,Rpl23,Rpl39,Rpl41,Tmem223,Tmem179b	0.013
134	query_1	TRUE	0.0365367	2177	143	31	0.216783	0.0142398	TF:M01167	TF	Factor: SAP-1a; motif: NACCGGAAGTV	21700	3074	TF:M00000	TF,TF,TF,TF,TF,TF,TF,TF,TF,TF,TF,TF,TF,TF,TF,TF,TF,TF,TF,TF,TF,TF,TF,TF,TF,TF,TF,TF,TF,TF,TF	Fam32a,Rps25,Rps5,Taok1,Rpl19,Nopchap1,Rack1,Supt4a,Nf1,Rpl14,Ago3,Rpl28,Rps3,Shq1,Rps21,Rpl37,Tbca,Uggt2,Rpl18a,Rps8,Get3,Srsf11,R3hdm1,Rpl30,Rpl11,Rpl26,Uqcrh,Rpl23,Rpl39,Rpl41,Tmem179b	0.014
135	query_1	TRUE	0.0378324	9962	143	90	0.629371	0.00903433	TF:M01991	TF	Factor: PEA3; motif: RCCGGAAGYN	21700	2734	TF:M00000	TF,TF,TF,TF,TF,TF,TF,TF,TF,TF,TF,TF,TF,TF,TF,TF,TF,TF,TF,TF,TF,TF,TF,TF,TF,TF,TF,TF,TF,TF,TF,TF,TF,TF,TF,TF,TF,TF,TF,TF,TF,TF,TF,TF,TF,TF,TF,TF,TF,TF,TF,TF,TF,TF,TF,TF,TF,TF,TF,TF,TF,TF,TF,TF,TF,TF,TF,TF,TF,TF,TF,TF,TF,TF,TF,TF,TF,TF,TF,TF,TF,TF,TF,TF,TF,TF,TF,TF,TF,TF	Fam32a,Rabac1,Cacna1b,Pafah1b3,Rps25,Rps5,Taok1,Rpl19,Socs2,Srgap1,Nopchap1,Rack1,Supt4a,Nf1,Vcan,Ncam2,Nr4a1,Cox7a2l,Pfdn1,Map3k2,Lcor,Tmem192,Rpl14,Pag1,Zdbf2,Ndufb5,Ttc14,Rps3a1,Lrrc7,Rps20,Psmb2,Ago3,Rpl28,Mfge8,Rps3,Polr2c,Ciao2b,Rpl4,Clasp2,Chmp2a,Zfc3h1,Atm,Rps29,Mid1,Shq1,Gmip,Hook3,Ubn2,Rps21,Fndc3b,Myo9a,Tet2,Rpl37,Tbca,Uggt2,Pura,Rpl18a,Penk,Fam185a,Rps8,Tnrc6b,Sv2c,Xkr4,Get3,Zfp182,Sr…	0.009
136	query_1	TRUE	0.0499742	4697	143	52	0.363636	0.0110709	TF:M01660_1	TF	Factor: GABP-alpha; motif: CTTCCK; match class: 1	21700	1259	TF:M01660	TF,TF,TF,TF,TF,TF,TF,TF,TF,TF,TF,TF,TF,TF,TF,TF,TF,TF,TF,TF,TF,TF,TF,TF,TF,TF,TF,TF,TF,TF,TF,TF,TF,TF,TF,TF,TF,TF,TF,TF,TF,TF,TF,TF,TF,TF,TF,TF,TF,TF,TF,TF	Fam32a,Cacna1b,Rps25,Rps5,Rpl19,Supt4a,Nf1,Ncam2,Cox7a2l,Map3k2,Rps24,Rpl14,Ndufb5,Ttc14,Rps3a1,Psmb2,Ago3,Rpl28,Ciao2b,Clasp2,Chmp2a,Zfc3h1,Atm,Rps29,Mid1,Shq1,Hook3,Rps21,Rpl37,Tbca,Rpl18a,Penk,Tnrc6b,Sv2c,Xkr4,Srsf11,R3hdm1,Usp34,Scn3a,Gstm1,Rpl30,Rpl11,Kcnh7,Rpl26,Rps12,Rps15,mt-Atp6,Rpl23,Kcnb2,Rpl41,Tmem223,Tmem179b	0.011
137	query_1	TRUE	1.32829e-24	78	62	23	0.370968	0.294872	WP:WP163	WP	Cytoplasmic ribosomal proteins	4533	46	WP:000000	WP,WP,WP,WP,WP,WP,WP,WP,WP,WP,WP,WP,WP,WP,WP,WP,WP,WP,WP,WP,WP,WP,WP	Rps25,Rps5,Rpl19,Rps24,Rps3a1,Rps20,Rpl28,Rps3,Rpl4,Rps29,Rps21,Rpl37,Rpl18a,Rps8,Rpl30,Rpl18,Rpl11,Rpl26,Rps12,Rpl17,Rps15,Rpl39,Rpl41	0.295
