# Supplementary material
Source: Research Square preprint supplement (doi:10.21203/rs.3.rs-8738572/v1)
Supplement: Supplementary file 7 [file d0dd7347545e11ab4d806dda.xlsx]

## Sheet: Sheet Description
Sheet	Description

## Sheet: Cell Type Differential
	p_val	avg_log2FC	pct.1	pct.2	p_val_adj	gene	cluster	comparison
1	3.91191e-29	0.543277	0.985	0.946	8.26586e-25	Nrxn3	094 SCH | Avp shell	KI_vs_WT
2	2.03208e-17	0.355032	0.998	1	4.29379e-13	Gm42418	094 SCH | Avp shell	KI_vs_WT
3	2.15843e-15	0.701739	0.885	0.759	4.56076e-11	Galntl6	094 SCH | Avp shell	KI_vs_WT
4	9.63195e-15	-0.913618	0.427	0.674	2.03523e-10	Cadm2	094 SCH | Avp shell	KI_vs_WT
5	4.48516e-14	-0.854302	0.451	0.656	9.47714e-10	Unc5d	094 SCH | Avp shell	KI_vs_WT
6	1.90908e-13	0.873019	0.637	0.415	4.03388e-09	Col25a1	094 SCH | Avp shell	KI_vs_WT
7	2.04421e-13	-1.23456	0.315	0.541	4.31942e-09	Tenm2	094 SCH | Avp shell	KI_vs_WT
8	2.14093e-13	0.513446	0.837	0.664	4.52378e-09	Rorb	094 SCH | Avp shell	KI_vs_WT
9	2.41136e-13	0.878075	0.9	0.757	5.09519e-09	Nrg1	094 SCH | Avp shell	KI_vs_WT
10	8.27899e-13	0.50713	0.929	0.819	1.74935e-08	Zfhx3	094 SCH | Avp shell	KI_vs_WT
11	1.50564e-12	0.599701	0.751	0.56	3.18142e-08	Pcdh11x	094 SCH | Avp shell	KI_vs_WT
12	1.86417e-12	0.967601	0.48	0.257	3.939e-08	9330185C12Rik	094 SCH | Avp shell	KI_vs_WT
13	2.65961e-12	-0.68016	0.576	0.782	5.61976e-08	Asic2	094 SCH | Avp shell	KI_vs_WT
14	3.74111e-12	0.262159	1	1	7.90497e-08	Malat1	094 SCH | Avp shell	KI_vs_WT
15	8.31252e-12	-0.792597	0.368	0.602	1.75643e-07	Dok6	094 SCH | Avp shell	KI_vs_WT
16	8.78302e-12	-1.19593	0.163	0.375	1.85585e-07	Adgrl2	094 SCH | Avp shell	KI_vs_WT
17	1.06772e-11	-3.35923	0.022	0.153	2.25609e-07	Sfta3-ps	094 SCH | Avp shell	KI_vs_WT
18	1.77334e-11	-1.31515	0.266	0.461	3.74706e-07	Rbms3	094 SCH | Avp shell	KI_vs_WT
19	1.3546e-10	0.689207	0.498	0.295	2.86228e-06	Avp	094 SCH | Avp shell	KI_vs_WT
20	1.77976e-10	0.41291	0.961	0.938	3.76064e-06	Agbl4	094 SCH | Avp shell	KI_vs_WT
21	2.16702e-10	-1.06483	0.283	0.473	4.57891e-06	Dpp10	094 SCH | Avp shell	KI_vs_WT
22	2.33561e-10	-1.09347	0.29	0.488	4.93514e-06	Robo1	094 SCH | Avp shell	KI_vs_WT
23	5.55098e-10	-0.999196	0.478	0.635	1.17292e-05	Rmst	094 SCH | Avp shell	KI_vs_WT
24	7.9908e-10	-1.27701	0.239	0.419	1.68846e-05	Tnr	094 SCH | Avp shell	KI_vs_WT
25	1.0814e-09	-0.327399	0.99	1	2.285e-05	Fam155a	094 SCH | Avp shell	KI_vs_WT
26	1.45777e-09	-0.805179	0.605	0.732	3.08026e-05	Dlgap1	094 SCH | Avp shell	KI_vs_WT
27	1.63458e-09	-0.804551	0.317	0.515	3.45386e-05	Clstn2	094 SCH | Avp shell	KI_vs_WT
28	2.16237e-09	-1.09387	0.212	0.392	4.56909e-05	Kcnip1	094 SCH | Avp shell	KI_vs_WT
29	3.17637e-09	0.383721	0.963	0.961	6.71167e-05	Cadm1	094 SCH | Avp shell	KI_vs_WT
30	3.47556e-09	0.71146	0.746	0.637	7.34387e-05	Khdrbs2	094 SCH | Avp shell	KI_vs_WT
31	5.35161e-09	-0.775821	0.402	0.581	0.000113079	Fstl4	094 SCH | Avp shell	KI_vs_WT
32	5.38964e-09	-1.20849	0.2	0.373	0.000113883	Car10	094 SCH | Avp shell	KI_vs_WT
33	5.41889e-09	0.301146	0.993	0.985	0.000114501	Nlgn1	094 SCH | Avp shell	KI_vs_WT
34	7.18991e-09	-1.15419	0.176	0.344	0.000151923	Prr16	094 SCH | Avp shell	KI_vs_WT
35	7.93759e-09	-0.841186	0.288	0.471	0.000167721	Limch1	094 SCH | Avp shell	KI_vs_WT
36	8.12115e-09	-0.51142	0.546	0.734	0.0001716	Dscam	094 SCH | Avp shell	KI_vs_WT
37	8.70492e-09	0.712252	0.712	0.585	0.000183935	Cnksr2	094 SCH | Avp shell	KI_vs_WT
38	1.30285e-08	-0.958828	0.21	0.378	0.000275292	Ryr2	094 SCH | Avp shell	KI_vs_WT
39	1.43383e-08	-0.392309	0.807	0.902	0.000302968	Frmd4a	094 SCH | Avp shell	KI_vs_WT
40	1.50178e-08	0.664626	0.729	0.616	0.000317327	Inpp4b	094 SCH | Avp shell	KI_vs_WT
41	1.56056e-08	0.539967	0.776	0.701	0.000329746	Setbp1	094 SCH | Avp shell	KI_vs_WT
42	2.08623e-08	-0.64924	0.634	0.763	0.000440819	Csmd1	094 SCH | Avp shell	KI_vs_WT
43	2.7696e-08	-1.30529	0.093	0.228	0.000585216	Cdh8	094 SCH | Avp shell	KI_vs_WT
44	3.17189e-08	0.280061	0.988	0.977	0.00067022	Macrod2	094 SCH | Avp shell	KI_vs_WT
45	3.74559e-08	-0.599195	0.5	0.678	0.000791443	Tenm1	094 SCH | Avp shell	KI_vs_WT
46	3.97467e-08	-0.815511	0.215	0.386	0.000839848	Cntn6	094 SCH | Avp shell	KI_vs_WT
47	4.19916e-08	0.474298	0.91	0.788	0.000887283	Kcnc2	094 SCH | Avp shell	KI_vs_WT
48	4.31139e-08	-0.514151	0.483	0.685	0.000910997	Dlgap2	094 SCH | Avp shell	KI_vs_WT
49	4.34874e-08	1.11433	0.237	0.102	0.000918889	Sh2d4b	094 SCH | Avp shell	KI_vs_WT
50	4.35511e-08	-0.765681	0.507	0.654	0.000920235	B3galt1	094 SCH | Avp shell	KI_vs_WT
51	5.46737e-08	0.923036	0.422	0.268	0.00115526	Adipor2	094 SCH | Avp shell	KI_vs_WT
52	6.08855e-08	-0.729005	0.283	0.458	0.00128651	Cdh4	094 SCH | Avp shell	KI_vs_WT
53	7.36482e-08	-1.09585	0.173	0.328	0.00155619	Robo2	094 SCH | Avp shell	KI_vs_WT
54	9.19051e-08	0.7163	0.605	0.469	0.00194196	Hs6st2	094 SCH | Avp shell	KI_vs_WT
55	1.20841e-07	0.698936	0.588	0.442	0.00255338	Tmem132d	094 SCH | Avp shell	KI_vs_WT
56	1.22496e-07	0.439858	0.883	0.828	0.00258833	Ntm	094 SCH | Avp shell	KI_vs_WT
57	1.2708e-07	-0.676628	0.266	0.452	0.0026852	Ubr2	094 SCH | Avp shell	KI_vs_WT
58	1.38462e-07	0.692751	0.654	0.498	0.0029257	Prkd1	094 SCH | Avp shell	KI_vs_WT
59	1.55093e-07	1.01684	0.324	0.174	0.00327711	Prr5l	094 SCH | Avp shell	KI_vs_WT
60	1.55635e-07	-0.722282	0.515	0.66	0.00328857	Nav2	094 SCH | Avp shell	KI_vs_WT
61	1.75093e-07	-1.18482	0.202	0.353	0.00369972	Kcnk2	094 SCH | Avp shell	KI_vs_WT
62	1.76009e-07	1.23312	0.246	0.118	0.00371906	Rasa4	094 SCH | Avp shell	KI_vs_WT
63	2.20496e-07	0.794853	0.363	0.212	0.00465909	Nfib	094 SCH | Avp shell	KI_vs_WT
64	2.43726e-07	0.575058	0.554	0.39	0.00514993	Kcnh8	094 SCH | Avp shell	KI_vs_WT
65	2.68925e-07	-1.61894	0.093	0.214	0.00568238	Bmper	094 SCH | Avp shell	KI_vs_WT
66	3.57002e-07	-1.89426	0.083	0.201	0.00754345	Tafa1	094 SCH | Avp shell	KI_vs_WT
67	3.57853e-07	-1.05009	0.144	0.284	0.00756143	Smpd3	094 SCH | Avp shell	KI_vs_WT
68	3.67796e-07	0.425742	0.82	0.755	0.00777154	Brinp3	094 SCH | Avp shell	KI_vs_WT
69	3.75801e-07	0.637016	0.395	0.241	0.00794068	Cdc14a	094 SCH | Avp shell	KI_vs_WT
70	3.81083e-07	-1.60559	0.08	0.197	0.00805228	Mpp6	094 SCH | Avp shell	KI_vs_WT
71	3.91162e-07	-1.09532	0.112	0.245	0.00826525	Runx1t1	094 SCH | Avp shell	KI_vs_WT
72	4.09749e-07	-0.842554	0.198	0.349	0.00865799	Ptprk	094 SCH | Avp shell	KI_vs_WT
73	4.12888e-07	-0.687634	0.38	0.541	0.00872432	Adam23	094 SCH | Avp shell	KI_vs_WT
74	4.54579e-07	-0.413177	0.754	0.84	0.00960525	Dst	094 SCH | Avp shell	KI_vs_WT
75	4.73748e-07	-0.77762	0.305	0.473	0.0100103	Aff2	094 SCH | Avp shell	KI_vs_WT
76	4.87847e-07	-0.834316	0.293	0.446	0.0103082	Nexmif	094 SCH | Avp shell	KI_vs_WT
77	6.09415e-07	0.478364	0.759	0.66	0.0128769	Syn2	094 SCH | Avp shell	KI_vs_WT
78	6.55374e-07	0.988323	0.378	0.237	0.0138481	Nfia	094 SCH | Avp shell	KI_vs_WT
79	6.71753e-07	0.338199	0.944	0.919	0.0141941	Rit2	094 SCH | Avp shell	KI_vs_WT
80	8.41745e-07	0.845297	0.32	0.18	0.0177861	Vipr2	094 SCH | Avp shell	KI_vs_WT
81	8.48871e-07	-0.502886	0.637	0.792	0.0179366	Csmd3	094 SCH | Avp shell	KI_vs_WT
82	1.02809e-06	0.408176	0.854	0.817	0.0217235	Prickle2	094 SCH | Avp shell	KI_vs_WT
83	1.18296e-06	0.282632	0.978	0.959	0.024996	Cntnap2	094 SCH | Avp shell	KI_vs_WT
84	1.19649e-06	-1.51208	0.088	0.201	0.0252818	Nckap5	094 SCH | Avp shell	KI_vs_WT
85	1.21114e-06	-1.57152	0.049	0.149	0.0255913	C1galt1	094 SCH | Avp shell	KI_vs_WT
86	1.32037e-06	0.477366	0.78	0.732	0.0278995	Ptprg	094 SCH | Avp shell	KI_vs_WT
87	1.41893e-06	-0.337929	0.802	0.907	0.029982	Pde4d	094 SCH | Avp shell	KI_vs_WT
88	1.46467e-06	-0.694579	0.463	0.598	0.0309484	Ptpro	094 SCH | Avp shell	KI_vs_WT
89	1.49988e-06	0.538382	0.634	0.502	0.0316925	Zmat4	094 SCH | Avp shell	KI_vs_WT
90	1.50529e-06	-1.25513	0.066	0.17	0.0318067	Snca	094 SCH | Avp shell	KI_vs_WT
91	1.644e-06	-0.527065	0.673	0.755	0.0347377	Cacnb2	094 SCH | Avp shell	KI_vs_WT
92	1.68369e-06	-0.810364	0.28	0.423	0.0355763	Foxn3	094 SCH | Avp shell	KI_vs_WT
93	1.68609e-06	0.345789	0.978	0.959	0.0356271	Rian	094 SCH | Avp shell	KI_vs_WT
94	1.73843e-06	-0.711979	0.454	0.583	0.0367329	Pcdh7	094 SCH | Avp shell	KI_vs_WT
95	1.76631e-06	0.88153	0.259	0.135	0.0373222	Csta2	094 SCH | Avp shell	KI_vs_WT
96	1.94902e-06	-0.440753	0.624	0.749	0.0411829	Astn2	094 SCH | Avp shell	KI_vs_WT
97	2.19556e-06	-0.311818	0.841	0.905	0.0463922	Rere	094 SCH | Avp shell	KI_vs_WT
98	2.19698e-06	0.657953	0.602	0.494	0.0464222	Pacrg	094 SCH | Avp shell	KI_vs_WT
99	2.46894e-06	-0.79169	0.293	0.44	0.0521686	Sestd1	094 SCH | Avp shell	KI_vs_WT
100	2.93696e-06	-0.680103	0.171	0.307	0.062058	Dach1	094 SCH | Avp shell	KI_vs_WT
101	3.28626e-06	0.94351	0.276	0.154	0.0694387	Sema3e	094 SCH | Avp shell	KI_vs_WT
102	3.49258e-06	-0.783282	0.183	0.317	0.0737983	Jph4	094 SCH | Avp shell	KI_vs_WT
103	4.12255e-06	0.450627	0.698	0.595	0.0871096	Rps6ka5	094 SCH | Avp shell	KI_vs_WT
104	4.33752e-06	-0.79276	0.21	0.349	0.0916518	Thrb	094 SCH | Avp shell	KI_vs_WT
18015	5.40029e-27	0.456502	1	1	1.14108e-22	Gm42418	094 SCH | Sst, Cd24a	KI_vs_WT
18016	3.77759e-11	-1.19616	0.288	0.456	7.98205e-07	Hs3st4	094 SCH | Sst, Cd24a	KI_vs_WT
18017	3.90203e-10	0.305543	0.977	0.936	8.245e-06	Nrxn3	094 SCH | Sst, Cd24a	KI_vs_WT
18018	2.69945e-09	-1.0915	0.158	0.308	5.70394e-05	Nectin3	094 SCH | Sst, Cd24a	KI_vs_WT
18019	5.16832e-09	-0.518916	0.658	0.792	0.000109207	C130073E24Rik	094 SCH | Sst, Cd24a	KI_vs_WT
18020	5.91196e-08	-1.48601	0.053	0.148	0.0012492	Deptor	094 SCH | Sst, Cd24a	KI_vs_WT
18021	7.07639e-08	-0.858515	0.174	0.319	0.00149524	Prrt1	094 SCH | Sst, Cd24a	KI_vs_WT
18022	8.72954e-08	-0.771364	0.419	0.561	0.00184455	Gpc6	094 SCH | Sst, Cd24a	KI_vs_WT
18023	9.17008e-08	-0.432033	0.647	0.79	0.00193764	Rasgrf2	094 SCH | Sst, Cd24a	KI_vs_WT
18024	1.09409e-07	-0.392129	0.956	0.979	0.00231181	Tenm2	094 SCH | Sst, Cd24a	KI_vs_WT
18025	1.16753e-07	1.00533	0.491	0.366	0.002467	Pex5l	094 SCH | Sst, Cd24a	KI_vs_WT
18026	1.3129e-07	-1.66047	0.098	0.203	0.00277416	Megf11	094 SCH | Sst, Cd24a	KI_vs_WT
18027	3.2325e-07	-0.407036	0.655	0.779	0.00683026	Pcdh15	094 SCH | Sst, Cd24a	KI_vs_WT
18028	3.31819e-07	-5.55619	0	0.039	0.00701135	Nr5a1	094 SCH | Sst, Cd24a	KI_vs_WT
18029	3.39591e-07	-0.644277	0.471	0.612	0.00717557	Schip1	094 SCH | Sst, Cd24a	KI_vs_WT
18030	3.5035e-07	-1.0137	0.087	0.193	0.00740289	Gpr149	094 SCH | Sst, Cd24a	KI_vs_WT
18031	5.52353e-07	-0.814149	0.105	0.216	0.0116712	Dnah7b	094 SCH | Sst, Cd24a	KI_vs_WT
18032	5.88159e-07	0.970131	0.405	0.281	0.0124278	Prlr	094 SCH | Sst, Cd24a	KI_vs_WT
18033	7.41917e-07	-0.411029	0.191	0.336	0.0156767	Gm4876	094 SCH | Sst, Cd24a	KI_vs_WT
18034	7.47319e-07	-0.346611	0.345	0.533	0.0157909	Phtf1	094 SCH | Sst, Cd24a	KI_vs_WT
18035	7.5161e-07	-2.8548	0.009	0.06	0.0158815	Rai14	094 SCH | Sst, Cd24a	KI_vs_WT
18036	7.74899e-07	-1.60241	0.039	0.116	0.0163736	Tmem35a	094 SCH | Sst, Cd24a	KI_vs_WT
18037	1.25867e-06	-0.569663	0.486	0.612	0.0265957	Tmem108	094 SCH | Sst, Cd24a	KI_vs_WT
18038	1.40716e-06	-1.01857	0.098	0.201	0.0297334	Bend7	094 SCH | Sst, Cd24a	KI_vs_WT
18039	1.51702e-06	-0.74307	0.168	0.296	0.0320546	Snca	094 SCH | Sst, Cd24a	KI_vs_WT
18040	2.06522e-06	-1.35015	0.044	0.12	0.0436381	Doc2b	094 SCH | Sst, Cd24a	KI_vs_WT
18041	2.07942e-06	-2.2941	0.014	0.066	0.0439381	Cfap206	094 SCH | Sst, Cd24a	KI_vs_WT
18042	2.31405e-06	-1.0603	0.111	0.216	0.0488958	Fam126a	094 SCH | Sst, Cd24a	KI_vs_WT
18043	2.50267e-06	-0.436848	0.279	0.415	0.0528813	Tafa1	094 SCH | Sst, Cd24a	KI_vs_WT
18044	2.7301e-06	-1.83458	0.069	0.152	0.057687	Pou6f2	094 SCH | Sst, Cd24a	KI_vs_WT
18045	2.93433e-06	-0.422066	0.33	0.478	0.0620023	Gm15398	094 SCH | Sst, Cd24a	KI_vs_WT
18046	3.11015e-06	-2.01689	0.027	0.09	0.0657176	Pcsk6	094 SCH | Sst, Cd24a	KI_vs_WT
18047	3.2445e-06	0.190165	0.995	0.998	0.0685563	Dlg2	094 SCH | Sst, Cd24a	KI_vs_WT
18048	3.5853e-06	-0.390629	0.396	0.561	0.0757574	Srrm3	094 SCH | Sst, Cd24a	KI_vs_WT
18049	3.86048e-06	-0.840323	0.054	0.135	0.081572	Il34	094 SCH | Sst, Cd24a	KI_vs_WT
18050	4.05692e-06	-0.400777	0.544	0.702	0.0857228	Hsp90ab1	094 SCH | Sst, Cd24a	KI_vs_WT
18051	4.20136e-06	-0.238553	0.896	0.955	0.0887747	Cacna1d	094 SCH | Sst, Cd24a	KI_vs_WT
18052	4.23979e-06	-0.487474	0.212	0.349	0.0895867	Nipsnap1	094 SCH | Sst, Cd24a	KI_vs_WT
34929	4.39834e-21	-6.49623	0.015	0.321	9.29369e-17	Col23a1	318 Astro-NT NN	KI_vs_WT
34930	4.61367e-18	0.756975	0.996	0.72	9.74868e-14	Ntm	318 Astro-NT NN	KI_vs_WT
34931	3.31483e-16	-3.11422	0.064	0.35	7.00423e-12	Cacnb2	318 Astro-NT NN	KI_vs_WT
34932	1.30172e-15	-3.25867	0.204	0.496	2.75053e-11	Slit2	318 Astro-NT NN	KI_vs_WT
34933	2.4899e-15	0.720401	0.977	0.703	5.26115e-11	Gpc5	318 Astro-NT NN	KI_vs_WT
34934	5.63703e-15	-1.76866	0.408	0.683	1.19111e-10	Rmst	318 Astro-NT NN	KI_vs_WT
34935	5.63894e-15	-3.3835	0.026	0.272	1.19151e-10	Spag16	318 Astro-NT NN	KI_vs_WT
34936	7.49623e-14	0.536945	0.992	0.996	1.58395e-09	Gm42418	318 Astro-NT NN	KI_vs_WT
34937	1.64718e-13	-2.83982	0.132	0.398	3.48049e-09	Sorbs2	318 Astro-NT NN	KI_vs_WT
34938	3.87726e-13	-3.46014	0.083	0.325	8.19264e-09	Efna5	318 Astro-NT NN	KI_vs_WT
34939	4.30116e-13	-2.69464	0.049	0.28	9.08836e-09	Adgrv1	318 Astro-NT NN	KI_vs_WT
34940	2.71634e-12	0.618931	0.981	0.76	5.73963e-08	Cadm2	318 Astro-NT NN	KI_vs_WT
34941	2.81297e-12	-7.91821	0.004	0.179	5.94381e-08	Mamdc2	318 Astro-NT NN	KI_vs_WT
34942	6.10749e-12	-5.31711	0.019	0.207	1.29051e-07	Sgcz	318 Astro-NT NN	KI_vs_WT
34943	9.47883e-12	0.60905	0.966	0.89	2.00288e-07	Qk	318 Astro-NT NN	KI_vs_WT
34944	9.51674e-12	-4.21377	0.015	0.199	2.01089e-07	Cacna2d3	318 Astro-NT NN	KI_vs_WT
34945	1.38799e-11	-5.26627	0.008	0.179	2.93282e-07	Enkur	318 Astro-NT NN	KI_vs_WT
34946	2.09721e-11	-6.12325	0.004	0.167	4.43141e-07	Slc16a2	318 Astro-NT NN	KI_vs_WT
34947	2.38886e-11	-2.43638	0.049	0.264	5.04766e-07	Fbxl7	318 Astro-NT NN	KI_vs_WT
34948	4.20873e-11	-2.7488	0.049	0.256	8.89305e-07	6330403K07Rik	318 Astro-NT NN	KI_vs_WT
34949	7.52984e-11	-6.46793	0.008	0.167	1.59105e-06	Sorcs3	318 Astro-NT NN	KI_vs_WT
34950	7.93093e-11	-5.46951	0.011	0.175	1.67581e-06	Cfap54	318 Astro-NT NN	KI_vs_WT
34951	9.63635e-11	-3.75511	0.023	0.199	2.03616e-06	Sorcs1	318 Astro-NT NN	KI_vs_WT
34952	1.72853e-10	0.622579	0.951	0.72	3.65238e-06	Gm3764	318 Astro-NT NN	KI_vs_WT
34953	2.15591e-10	-8.44029	0	0.142	4.55543e-06	C230072F16Rik	318 Astro-NT NN	KI_vs_WT
34954	2.90715e-10	-2.87272	0.023	0.195	6.1428e-06	Ap1s2	318 Astro-NT NN	KI_vs_WT
34955	3.88127e-10	-2.37013	0.049	0.244	8.20112e-06	Cfap69	318 Astro-NT NN	KI_vs_WT
34956	4.04824e-10	-9.06711	0	0.138	8.55393e-06	Fstl4	318 Astro-NT NN	KI_vs_WT
34957	4.65675e-10	-1.96134	0.072	0.28	9.83972e-06	Cdc14a	318 Astro-NT NN	KI_vs_WT
34958	6.50084e-10	0.402868	0.985	0.963	1.37363e-05	Npas3	318 Astro-NT NN	KI_vs_WT
34959	7.58629e-10	-8.46742	0	0.134	1.60298e-05	Tshr	318 Astro-NT NN	KI_vs_WT
34960	7.58629e-10	-8.44438	0	0.134	1.60298e-05	Dnah11	318 Astro-NT NN	KI_vs_WT
34961	9.89132e-10	-5.72691	0.004	0.142	2.09004e-05	Ccdc170	318 Astro-NT NN	KI_vs_WT
34962	1.08091e-09	-2.79586	0.019	0.179	2.28397e-05	Slc38a1	318 Astro-NT NN	KI_vs_WT
34963	1.37836e-09	-3.56739	0.019	0.175	2.91247e-05	Pdzrn3	318 Astro-NT NN	KI_vs_WT
34964	1.84059e-09	-1.07769	0.408	0.659	3.88917e-05	Map2	318 Astro-NT NN	KI_vs_WT
34965	2.50068e-09	-3.98574	0.008	0.146	5.28395e-05	Deptor	318 Astro-NT NN	KI_vs_WT
34966	2.64846e-09	-8.63618	0	0.126	5.59619e-05	Gm31592	318 Astro-NT NN	KI_vs_WT
34967	2.84653e-09	0.50068	0.947	0.825	6.01472e-05	Ctnnd2	318 Astro-NT NN	KI_vs_WT
34968	9.63982e-09	-0.862853	0.404	0.659	0.000203689	Lncpint	318 Astro-NT NN	KI_vs_WT
34969	1.06024e-08	-1.75078	0.094	0.293	0.000224029	Sfta3-ps	318 Astro-NT NN	KI_vs_WT
34970	2.10086e-08	-6.95074	0.004	0.122	0.000443912	Grik3	318 Astro-NT NN	KI_vs_WT
34971	2.37938e-08	0.434296	0.97	0.898	0.000502764	Adgrb3	318 Astro-NT NN	KI_vs_WT
34972	3.15593e-08	-8.08444	0	0.11	0.000666848	Dnah9	318 Astro-NT NN	KI_vs_WT
34973	3.37284e-08	-3.65683	0.015	0.146	0.000712681	Lrriq1	318 Astro-NT NN	KI_vs_WT
34974	3.97984e-08	-8.29626	0.004	0.118	0.00084094	Col25a1	318 Astro-NT NN	KI_vs_WT
34975	4.19902e-08	-3.48064	0.015	0.146	0.000887253	Shroom3	318 Astro-NT NN	KI_vs_WT
34976	4.20685e-08	-2.56076	0.026	0.171	0.000888907	Sorbs2os	318 Astro-NT NN	KI_vs_WT
34977	4.38151e-08	-3.33966	0.03	0.175	0.000925813	Map1b	318 Astro-NT NN	KI_vs_WT
34978	5.24118e-08	0.673856	0.758	0.598	0.00110746	Ddhd1	318 Astro-NT NN	KI_vs_WT
34979	5.46266e-08	-3.97215	0.008	0.126	0.00115426	Col11a1	318 Astro-NT NN	KI_vs_WT
34980	5.83757e-08	-8.29349	0	0.106	0.00123348	Ccbe1	318 Astro-NT NN	KI_vs_WT
34981	6.47176e-08	0.51762	0.879	0.703	0.00136748	Fry	318 Astro-NT NN	KI_vs_WT
34982	6.97466e-08	-1.31683	0.121	0.325	0.00147375	Rtn1	318 Astro-NT NN	KI_vs_WT
34983	7.28838e-08	-1.00958	0.543	0.724	0.00154003	Rfx3	318 Astro-NT NN	KI_vs_WT
34984	7.83738e-08	-1.93882	0.042	0.195	0.00165604	St6galnac3	318 Astro-NT NN	KI_vs_WT
34985	7.97411e-08	-5.26348	0.004	0.114	0.00168493	Cfap43	318 Astro-NT NN	KI_vs_WT
34986	8.97798e-08	0.693476	0.826	0.728	0.00189705	Wdr17	318 Astro-NT NN	KI_vs_WT
34987	9.77592e-08	-4.32171	0.008	0.122	0.00206565	Kif27	318 Astro-NT NN	KI_vs_WT
34988	1.12779e-07	0.534439	0.909	0.732	0.00238303	Sparcl1	318 Astro-NT NN	KI_vs_WT
34989	1.33944e-07	-2.20198	0.057	0.215	0.00283023	Col5a2	318 Astro-NT NN	KI_vs_WT
34990	1.40802e-07	-5.58727	0.004	0.11	0.00297515	Hmcn1	318 Astro-NT NN	KI_vs_WT
34991	1.42457e-07	0.428457	0.974	0.821	0.00301012	Slc4a4	318 Astro-NT NN	KI_vs_WT
34992	1.50077e-07	-2.06596	0.075	0.24	0.00317113	Mgat5	318 Astro-NT NN	KI_vs_WT
34993	1.8198e-07	-2.72085	0.026	0.159	0.00384523	Anks1b	318 Astro-NT NN	KI_vs_WT
34994	1.95651e-07	-3.74543	0.038	0.175	0.00413412	Meg3	318 Astro-NT NN	KI_vs_WT
34995	1.97741e-07	0.562251	0.834	0.715	0.00417827	Ncam1	318 Astro-NT NN	KI_vs_WT
34996	2.13152e-07	0.873527	0.589	0.398	0.00450391	Sash1	318 Astro-NT NN	KI_vs_WT
34997	2.14643e-07	-3.44353	0.011	0.126	0.0045354	Kif9	318 Astro-NT NN	KI_vs_WT
34998	2.34102e-07	0.45734	0.951	0.72	0.00494658	Kcnd2	318 Astro-NT NN	KI_vs_WT
34999	2.48672e-07	-2.07105	0.068	0.228	0.00525443	Rpgr	318 Astro-NT NN	KI_vs_WT
35000	2.50146e-07	-1.82752	0.075	0.244	0.00528558	Lrrc9	318 Astro-NT NN	KI_vs_WT
35001	2.87918e-07	-4.59674	0.004	0.106	0.0060837	S100a6	318 Astro-NT NN	KI_vs_WT
35002	3.02458e-07	-4.14387	0.004	0.106	0.00639094	Gm42722	318 Astro-NT NN	KI_vs_WT
35003	3.14948e-07	-2.81144	0.026	0.154	0.00665485	Jazf1	318 Astro-NT NN	KI_vs_WT
35004	3.31492e-07	0.603945	0.77	0.63	0.00700442	Dock4	318 Astro-NT NN	KI_vs_WT
35005	3.59972e-07	-2.83422	0.023	0.146	0.00760622	Rian	318 Astro-NT NN	KI_vs_WT
35006	3.65837e-07	-7.81911	0	0.093	0.00773014	Cfap299	318 Astro-NT NN	KI_vs_WT
35007	3.65837e-07	-9.02594	0	0.093	0.00773014	P3h2	318 Astro-NT NN	KI_vs_WT
35008	4.03636e-07	-2.82733	0.019	0.138	0.00852883	Cdr1os	318 Astro-NT NN	KI_vs_WT
35009	4.14162e-07	-3.04084	0.015	0.13	0.00875124	Thsd4	318 Astro-NT NN	KI_vs_WT
35010	4.20076e-07	-3.11661	0.015	0.13	0.00887621	Sgsm1	318 Astro-NT NN	KI_vs_WT
35011	4.2847e-07	-1.81189	0.053	0.203	0.00905357	Ccdc39	318 Astro-NT NN	KI_vs_WT
35012	4.49216e-07	-1.79855	0.049	0.195	0.00949193	Wdr78	318 Astro-NT NN	KI_vs_WT
35013	4.72759e-07	-2.48927	0.038	0.171	0.0099894	Sulf1	318 Astro-NT NN	KI_vs_WT
35014	5.07008e-07	0.812769	0.649	0.451	0.0107131	Kirrel3	318 Astro-NT NN	KI_vs_WT
35015	5.08215e-07	-1.94327	0.075	0.232	0.0107386	Csrnp3	318 Astro-NT NN	KI_vs_WT
35016	5.21601e-07	-1.26391	0.155	0.354	0.0110214	Antxr1	318 Astro-NT NN	KI_vs_WT
35017	5.2376e-07	-2.37026	0.053	0.195	0.011067	Spef2	318 Astro-NT NN	KI_vs_WT
35018	5.40071e-07	0.340807	0.992	0.988	0.0114117	Nrxn1	318 Astro-NT NN	KI_vs_WT
35019	6.72434e-07	-7.10056	0	0.089	0.0142085	Iqub	318 Astro-NT NN	KI_vs_WT
35020	6.72434e-07	-7.30748	0	0.089	0.0142085	Ak9	318 Astro-NT NN	KI_vs_WT
35021	7.43085e-07	-3.12984	0.008	0.11	0.0157014	Efhb	318 Astro-NT NN	KI_vs_WT
35022	7.47209e-07	-2.14433	0.053	0.195	0.0157885	Lix1	318 Astro-NT NN	KI_vs_WT
35023	1.39914e-06	-1.98159	0.038	0.167	0.0295637	Klhl29	318 Astro-NT NN	KI_vs_WT
35024	1.44367e-06	-1.17139	0.125	0.305	0.0305047	Nedd4l	318 Astro-NT NN	KI_vs_WT
35025	1.6322e-06	-1.24129	0.155	0.333	0.0344884	Tmem178b	318 Astro-NT NN	KI_vs_WT
35026	1.63875e-06	-2.21805	0.023	0.138	0.0346267	Lrrc8d	318 Astro-NT NN	KI_vs_WT
35027	1.66809e-06	-5.21789	0.004	0.093	0.0352467	Rspo3	318 Astro-NT NN	KI_vs_WT
35028	1.68174e-06	-4.92292	0.004	0.093	0.0355351	Zbbx	318 Astro-NT NN	KI_vs_WT
35029	1.88887e-06	-2.44302	0.045	0.175	0.0399119	Slc8a1	318 Astro-NT NN	KI_vs_WT
35030	1.97356e-06	-4.10633	0.008	0.102	0.0417013	Ccdc146	318 Astro-NT NN	KI_vs_WT
35031	2.08211e-06	-3.99212	0.008	0.102	0.0439951	D430041D05Rik	318 Astro-NT NN	KI_vs_WT
35032	2.23014e-06	-3.65228	0.008	0.102	0.0471228	Map3k5	318 Astro-NT NN	KI_vs_WT
35033	2.26254e-06	-8.06518	0	0.081	0.0478074	Flt1	318 Astro-NT NN	KI_vs_WT
35034	2.26254e-06	-7.24943	0	0.081	0.0478074	Hydin	318 Astro-NT NN	KI_vs_WT
35035	2.30433e-06	0.378973	0.947	0.939	0.0486905	Macf1	318 Astro-NT NN	KI_vs_WT
35036	2.32717e-06	-1.5904	0.109	0.276	0.0491731	Prr16	318 Astro-NT NN	KI_vs_WT
35037	2.4062e-06	-2.31409	0.045	0.175	0.050843	Inpp4b	318 Astro-NT NN	KI_vs_WT
35038	2.63995e-06	-2.37817	0.011	0.11	0.0557821	Col4a6	318 Astro-NT NN	KI_vs_WT
35039	2.68439e-06	0.733425	0.66	0.472	0.0567211	Gm6145	318 Astro-NT NN	KI_vs_WT
35040	2.71282e-06	-2.19018	0.034	0.154	0.057322	Spata17	318 Astro-NT NN	KI_vs_WT
35041	3.28204e-06	1.0334	0.502	0.354	0.0693496	Grm3	318 Astro-NT NN	KI_vs_WT
35042	4.5906e-06	-1.25019	0.155	0.329	0.0969994	Garem1	318 Astro-NT NN	KI_vs_WT
54736	3.75206e-06	0.503826	1	1	0.079281	Gm42418	094 SCH | Cck/C1ql3	KI_vs_WT
74315	1.01004e-12	0.475992	1	1	2.13421e-08	Gm42418	098 AHN-SBPV-PVHd Pdrm12 Gaba	KI_vs_WT
74316	5.05654e-11	0.743696	0.952	0.792	1.06845e-06	Zfhx3	098 AHN-SBPV-PVHd Pdrm12 Gaba	KI_vs_WT
74317	2.19176e-10	0.899562	0.884	0.706	4.63118e-06	Col25a1	098 AHN-SBPV-PVHd Pdrm12 Gaba	KI_vs_WT
74318	3.14068e-10	1.16642	0.776	0.457	6.63626e-06	Alk	098 AHN-SBPV-PVHd Pdrm12 Gaba	KI_vs_WT
74319	3.95128e-10	-0.878194	0.844	0.944	8.34906e-06	Celf2	098 AHN-SBPV-PVHd Pdrm12 Gaba	KI_vs_WT
74320	1.46367e-08	0.613888	0.946	0.904	0.000309274	Spock3	098 AHN-SBPV-PVHd Pdrm12 Gaba	KI_vs_WT
74321	2.8528e-08	-2.12195	0.177	0.447	0.000602798	Slit3	098 AHN-SBPV-PVHd Pdrm12 Gaba	KI_vs_WT
74322	4.13713e-08	-2.09399	0.095	0.35	0.000874176	Camkv	098 AHN-SBPV-PVHd Pdrm12 Gaba	KI_vs_WT
74323	5.94144e-08	0.517008	0.986	0.99	0.00125543	Pcdh9	098 AHN-SBPV-PVHd Pdrm12 Gaba	KI_vs_WT
74324	1.51986e-07	-1.82208	0.177	0.442	0.00321146	Ntng1	098 AHN-SBPV-PVHd Pdrm12 Gaba	KI_vs_WT
74325	1.66274e-07	-2.06215	0.129	0.381	0.00351338	Nfib	098 AHN-SBPV-PVHd Pdrm12 Gaba	KI_vs_WT
74326	1.74991e-07	0.652317	0.905	0.69	0.00369757	Elmo1	098 AHN-SBPV-PVHd Pdrm12 Gaba	KI_vs_WT
74327	2.80413e-07	0.497523	0.993	0.985	0.00592512	Agbl4	098 AHN-SBPV-PVHd Pdrm12 Gaba	KI_vs_WT
74328	3.23921e-07	0.508641	0.966	0.909	0.00684445	A230006K03Rik	098 AHN-SBPV-PVHd Pdrm12 Gaba	KI_vs_WT
74329	3.3165e-07	-2.62232	0.041	0.239	0.00700775	Nectin3	098 AHN-SBPV-PVHd Pdrm12 Gaba	KI_vs_WT
74330	6.71027e-07	0.971139	0.667	0.411	0.0141788	Grm3	098 AHN-SBPV-PVHd Pdrm12 Gaba	KI_vs_WT
74331	8.7519e-07	0.408718	1	0.914	0.0184928	Nrxn3	098 AHN-SBPV-PVHd Pdrm12 Gaba	KI_vs_WT
74332	1.25476e-06	-5.64357	0	0.147	0.0265131	Slc17a6	098 AHN-SBPV-PVHd Pdrm12 Gaba	KI_vs_WT
74333	1.25542e-06	-1.58028	0.156	0.401	0.026527	Map3k5	098 AHN-SBPV-PVHd Pdrm12 Gaba	KI_vs_WT
74334	1.52988e-06	-0.885779	0.932	0.949	0.0323264	Rbfox1	098 AHN-SBPV-PVHd Pdrm12 Gaba	KI_vs_WT
74335	1.72707e-06	-0.702395	0.639	0.848	0.036493	Prkg1	098 AHN-SBPV-PVHd Pdrm12 Gaba	KI_vs_WT
74336	1.9811e-06	-5.36853	0	0.142	0.0418607	Sfta3-ps	098 AHN-SBPV-PVHd Pdrm12 Gaba	KI_vs_WT
74337	2.02637e-06	-2.37458	0.129	0.34	0.0428172	Tafa1	098 AHN-SBPV-PVHd Pdrm12 Gaba	KI_vs_WT
74338	2.71069e-06	0.805765	0.599	0.35	0.0572768	Otof	098 AHN-SBPV-PVHd Pdrm12 Gaba	KI_vs_WT
74339	3.02348e-06	-2.43156	0.17	0.376	0.063886	Fstl4	098 AHN-SBPV-PVHd Pdrm12 Gaba	KI_vs_WT
74340	3.38043e-06	-0.942572	0.306	0.574	0.0714284	Dapk1	098 AHN-SBPV-PVHd Pdrm12 Gaba	KI_vs_WT
74341	3.53774e-06	-0.760129	0.884	0.934	0.0747524	Ptprd	098 AHN-SBPV-PVHd Pdrm12 Gaba	KI_vs_WT
74342	3.67133e-06	-1.65952	0.068	0.269	0.0775753	Gm12239	098 AHN-SBPV-PVHd Pdrm12 Gaba	KI_vs_WT
74343	3.95936e-06	1.10286	0.626	0.462	0.0836612	Cdh12	098 AHN-SBPV-PVHd Pdrm12 Gaba	KI_vs_WT
93022	2.35167e-13	-7.00705	0	0.188	4.96908e-09	Sfta3-ps	132 AHN-RCH-LHA Otp Fezf1 Glut	KI_vs_WT
93023	1.7834e-09	-4.42555	0.019	0.177	3.76832e-05	Grik3	132 AHN-RCH-LHA Otp Fezf1 Glut	KI_vs_WT
93024	3.17692e-09	-2.52478	0.045	0.229	6.71282e-05	Gpr149	132 AHN-RCH-LHA Otp Fezf1 Glut	KI_vs_WT
93025	9.38685e-09	-1.63499	0.143	0.365	0.000198344	Rreb1	132 AHN-RCH-LHA Otp Fezf1 Glut	KI_vs_WT
93026	1.03802e-08	-3.20494	0.068	0.25	0.000219333	Megf11	132 AHN-RCH-LHA Otp Fezf1 Glut	KI_vs_WT
93027	2.02726e-08	-1.13633	0.17	0.422	0.000428359	Lmo3	132 AHN-RCH-LHA Otp Fezf1 Glut	KI_vs_WT
93028	4.42317e-08	-0.493953	0.894	0.943	0.000934615	Gria1	132 AHN-RCH-LHA Otp Fezf1 Glut	KI_vs_WT
93029	5.93768e-08	-0.717819	0.868	0.943	0.00125463	Celf2	132 AHN-RCH-LHA Otp Fezf1 Glut	KI_vs_WT
93030	7.49737e-08	-0.721468	0.898	0.964	0.00158419	Tenm2	132 AHN-RCH-LHA Otp Fezf1 Glut	KI_vs_WT
93031	9.95993e-08	-2.5043	0.03	0.177	0.00210453	Tmem35a	132 AHN-RCH-LHA Otp Fezf1 Glut	KI_vs_WT
93032	1.57674e-07	-1.5375	0.109	0.302	0.00333165	Gda	132 AHN-RCH-LHA Otp Fezf1 Glut	KI_vs_WT
93033	1.79231e-07	-0.967979	0.34	0.557	0.00378715	Arpp21	132 AHN-RCH-LHA Otp Fezf1 Glut	KI_vs_WT
93034	2.28492e-07	-1.05112	0.457	0.667	0.00482804	Slit3	132 AHN-RCH-LHA Otp Fezf1 Glut	KI_vs_WT
93035	2.98372e-07	-1.2545	0.325	0.536	0.00630459	Gm1604a	132 AHN-RCH-LHA Otp Fezf1 Glut	KI_vs_WT
93036	3.19318e-07	-1.96242	0.042	0.193	0.00674719	Traip	132 AHN-RCH-LHA Otp Fezf1 Glut	KI_vs_WT
93037	6.84467e-07	0.605685	0.845	0.74	0.0144628	Zfhx3	132 AHN-RCH-LHA Otp Fezf1 Glut	KI_vs_WT
93038	7.55834e-07	0.344507	0.996	0.995	0.0159708	Ctnnd2	132 AHN-RCH-LHA Otp Fezf1 Glut	KI_vs_WT
93039	8.86876e-07	-2.78898	0.026	0.151	0.0187397	Lemd1	132 AHN-RCH-LHA Otp Fezf1 Glut	KI_vs_WT
93040	1.00811e-06	-0.675547	0.551	0.745	0.0213013	Fhod3	132 AHN-RCH-LHA Otp Fezf1 Glut	KI_vs_WT
93041	1.01337e-06	-1.26258	0.151	0.344	0.0214125	Glra1	132 AHN-RCH-LHA Otp Fezf1 Glut	KI_vs_WT
93042	1.02941e-06	-1.52819	0.106	0.286	0.0217515	Disp3	132 AHN-RCH-LHA Otp Fezf1 Glut	KI_vs_WT
93043	1.0318e-06	-1.73612	0.317	0.495	0.0218019	Hs3st4	132 AHN-RCH-LHA Otp Fezf1 Glut	KI_vs_WT
93044	1.2316e-06	-0.544286	0.789	0.911	0.0260237	Ryr2	132 AHN-RCH-LHA Otp Fezf1 Glut	KI_vs_WT
93045	1.26149e-06	-1.02096	0.136	0.328	0.0266554	9530026P05Rik	132 AHN-RCH-LHA Otp Fezf1 Glut	KI_vs_WT
93046	1.32976e-06	0.469437	0.977	0.969	0.0280978	Grid1	132 AHN-RCH-LHA Otp Fezf1 Glut	KI_vs_WT
93047	1.70734e-06	-1.48979	0.075	0.24	0.0360761	Cacna1h	132 AHN-RCH-LHA Otp Fezf1 Glut	KI_vs_WT
93048	1.81286e-06	-3.25861	0.019	0.13	0.0383057	Nr2f2	132 AHN-RCH-LHA Otp Fezf1 Glut	KI_vs_WT
93049	1.83406e-06	-2.24042	0.03	0.156	0.0387538	Fezf1	132 AHN-RCH-LHA Otp Fezf1 Glut	KI_vs_WT
93050	1.95042e-06	-0.379283	0.958	0.984	0.0412124	Il1rapl1	132 AHN-RCH-LHA Otp Fezf1 Glut	KI_vs_WT
93051	2.64381e-06	0.30779	1	1	0.0558638	Dlg2	132 AHN-RCH-LHA Otp Fezf1 Glut	KI_vs_WT
93052	3.0942e-06	-2.72516	0.023	0.135	0.0653805	Hmcn2	132 AHN-RCH-LHA Otp Fezf1 Glut	KI_vs_WT
93053	3.26965e-06	-2.59324	0.023	0.135	0.0690877	B130024G19Rik	132 AHN-RCH-LHA Otp Fezf1 Glut	KI_vs_WT
93054	3.5407e-06	-1.54091	0.075	0.229	0.074815	Cntn2	132 AHN-RCH-LHA Otp Fezf1 Glut	KI_vs_WT
93055	4.27723e-06	-1.18907	0.079	0.24	0.0903779	Fam126a	132 AHN-RCH-LHA Otp Fezf1 Glut	KI_vs_WT
93056	4.60023e-06	-0.45432	0.891	0.932	0.097203	Cacna1e	132 AHN-RCH-LHA Otp Fezf1 Glut	KI_vs_WT
110987	2.87403e-06	-2.72957	0.043	0.383	0.0607282	Slc35a3	100 AHN Onecut3 Gaba	KI_vs_WT
130448	2.81855e-06	0.525279	1	1	0.059556	Gm42418	326 OPC NN	KI_vs_WT
170909	4.95391e-09	2.38799	0.52	0.162	0.000104676	Gpc5	099 SBPV-PVa Six6 Satb2 Gaba	KI_vs_WT
170910	1.35902e-07	4.25081	0.392	0.111	0.00287161	Pde1c	099 SBPV-PVa Six6 Satb2 Gaba	KI_vs_WT
170911	3.07046e-06	-3.19565	0.018	0.172	0.0648788	Prox1	099 SBPV-PVa Six6 Satb2 Gaba	KI_vs_WT
170912	3.62246e-06	0.976637	0.994	1	0.0765426	Ctnna2	099 SBPV-PVa Six6 Satb2 Gaba	KI_vs_WT
189630	8.21789e-13	0.663121	0.997	0.993	1.73644e-08	Gm42418	327 Oligo NN	KI_vs_WT

## Sheet: Reference Umap Embeddings
	umap_1	umap_2
1.01917e+18	-18.4153	3.26955
1.01917e+18	-18.38	3.30496
1.01917e+18	-18.2301	3.45475
1.01917e+18	-18.4419	3.24304
1.01917e+18	-18.3492	3.33573
1.01917e+18	-18.4187	3.26627
1019171907101550250-2	-18.2964	3.3884
1019171907101540069-2	-18.3758	3.30912
1019171907101890036-1	-18.3904	3.29451
1019171907101730277-2	-18.3542	3.3309
1019171907101710263-1	-18.3154	3.36958
1019171907101550890-1	-18.3092	3.37554
1019171907101550436-2	-18.3811	3.3034
1.01917e+18	-18.4266	3.2584
1019171907101550216-3	-10.7931	-2.7373
1.01917e+18	-11.4039	-3.49635
1.01917e+18	-10.8347	-2.99122
1.01917e+18	-10.6238	8.87263
1.01917e+18	-11.6657	-3.2638
1019171907101540151-1	-10.7468	-2.96263
1019171907101710054-2	-10.5566	-1.36302
1019171907101550200-1	-10.6542	-1.46174
1.01917e+18	-11.7302	-3.31697
1019171907101550796-1	-11.3143	-3.39292
1019171907101710148-2	-10.3626	-1.66076
1.01917e+18	-10.677	-2.7189
1019171907101710223-2	-10.3824	-2.28851
1019171907101710112-2	-10.4746	-2.24705
1019171907101710158-2	-10.6303	-1.97222
1.01917e+18	-10.859	-2.8221
1.01917e+18	-10.5581	-2.17641
1.01917e+18	-10.8469	-3.01792
1.01917e+18	-10.3914	-1.6251
1019171907101540142-1	-10.257	-1.81943
1.01917e+18	-10.5848	8.85379
1019171907101710134-2	-10.4089	-2.16016
1019171907101540256-1	-8.13537	9.94449
1019171907101550240-1	-10.9037	-3.01714
1019171907101550357-2	-10.7419	-1.78131
1.01917e+18	-10.5711	-1.39102
1019171907101540078-2	-10.2392	-1.69702
1019171907101540076-1	-10.3628	-1.7091
1019171907101710183-2	-11.2318	-3.29615
1019171907101550123-3	-10.3597	-1.77108
1019171907101710267-2	-10.5673	-1.85051
1.01917e+18	-10.6208	-2.74003
1019171907101710128-2	-10.7719	-2.73243
1019171907101540064-2	-10.7034	-2.91488
1019171907101540102-1	-10.3968	-1.68463
1.01917e+18	-10.356	-2.2281
1019171907101710092-2	-10.5411	-1.93784
1019171907101540208-1	-10.4138	-2.22489
1.01917e+18	-10.6408	-2.9132
1019171907101710177-1	-10.7612	-2.11807
1019171907101710090-3	-2.31174	-14.1338
1019171907101710105-2	-10.5241	-1.93672
1019171907101710118-2	-10.5554	-2.56135
1019171907101540080-2	-10.4861	-1.94531
1019171907101710197-1	-11.5631	-3.42906
1019171907101540048-2	-10.5912	-1.35243
1.01917e+18	-10.6642	-2.99649
1.01917e+18	-10.5496	-1.77449
1019171907101540189-1	-10.4921	-1.65619
1.01917e+18	-10.56	-1.94637
1.01917e+18	-10.4373	-1.72284
1019171907101540273-1	-10.2747	-1.69567
1019171907101710106-1	-10.791	-2.85405
1019171907101540083-2	-10.3016	-1.76032
1019171907101550211-1	-9.66697	-7.2257
1.01917e+18	-11.5035	-2.62
1.01917e+18	-9.74056	-6.97755
1.01917e+18	-22.0104	7.49606
1.01917e+18	-9.23051	-8.13102
1.01917e+18	-11.4836	-3.12719
1019171907101730255-1	-11.1015	-5.2409
1.01917e+18	-9.37126	-7.25004
1019171907101730427-2	-9.34157	-7.85993
1.01917e+18	-11.6591	-3.91124
1019171907101550175-1	-11.9435	-3.92198
1019171907101550251-2	-11.0697	-2.22017
1.01917e+18	-9.68477	-7.2866
1.01917e+18	10.295	6.53955
1.01917e+18	-9.20501	-8.19902
1019171907101720134-2	-11.3275	-4.89397
1.01917e+18	-11.8325	-4.01419
1.01917e+18	-11.878	-3.33834
1019171907101730184-1	-11.4847	-4.5639
1019171907101710257-2	-9.54104	-6.967
1.01917e+18	-11.6135	-2.79938
1.01917e+18	-9.42394	-7.23891
1.01917e+18	-11.4003	-4.76584
1.01917e+18	-9.19934	-8.12939
1019171907101730212-2	-9.61247	-7.27386
1019171907101730501-1	-9.52096	-7.80153
1019171907101730513-2	-9.26266	-8.12159
1.01917e+18	-11.6231	-2.73711
1.01917e+18	-9.15578	-8.14165
1.01917e+18	-10.6483	-2.05389
1019171907101550340-2	-11.3081	-4.93409
1019171907101730528-2	-9.53091	-7.60994
1019171907101550137-3	-9.77568	-6.7422
1.01917e+18	-10.9938	-5.3983
1.01917e+18	-11.8452	-3.22177
1.01917e+18	-11.681	-4.39182
1.01917e+18	-11.447	-4.72343
1019171907101710231-2	-9.41963	-7.76637
1019171907101710313-1	-11.8685	-3.86255
1.01917e+18	-10.5925	-2.27773
1.01917e+18	-9.69514	-7.18459
1.01917e+18	-9.32138	-7.76142
1019171907101710133-1	-10.8223	-3.00836
1.01917e+18	-9.44326	-7.6659
1.01917e+18	-11.4871	-3.83254
1.01917e+18	-11.8469	-3.20947
1019171907101720264-2	-10.9392	-2.0229
1.01917e+18	-11.0561	-5.28563
1.01917e+18	-9.52094	-7.1067
1019171907101550265-3	-11.6243	-4.41758
1.01917e+18	-11.8267	-3.27287
1.01917e+18	-11.8183	-3.73724
1.01917e+18	-9.993	-6.50817
1.01917e+18	-11.9027	-3.78036
1.01917e+18	2.32238	4.74665
1019171907101720196-2	1.31807	8.3395
1019171907101720390-1	1.33609	6.09705
1019171907101720541-1	-11.5924	-4.49207
1019171907101720573-1	-10.8855	-5.51122
1019171907101720581-1	-11.2808	-5.06186
1019171907101730593-1	-9.8324	-6.64588
1019171907101720621-1	-10.756	-5.67039
1.01917e+18	-9.56355	-7.67939
1019171907101540229-1	-11.6735	-3.15268
1019171907101550880-1	-11.0433	-2.81822
1019171907101720435-1	-10.6317	-1.35811
1019171907101550841-1	-11.8889	-3.47622
1.01917e+18	-10.8539	-2.59658
1.01917e+18	-22.0379	7.38267
1.01917e+18	-10.9664	-2.71675
1019171907101730625-1	-6.29201	0.860696
1019171907101550157-2	-6.29129	0.854806
1.01917e+18	-6.32424	0.885501
1019171907101550774-1	-6.52209	1.05008
1.01917e+18	-10.7246	-1.44988
1.01917e+18	-6.25477	0.864032
1019171907101710182-2	-6.66915	1.17466
1019171907101550198-1	-6.12836	0.792955
1019171907101540040-1	-6.615	1.15988
1.01917e+18	-6.32478	0.839842
1.01917e+18	-6.29071	0.859598
1019171907101730119-2	-6.21337	0.70613
1.01917e+18	-6.17669	0.697663
1.01917e+18	-6.2939	0.791067
1019171907101720619-1	-6.47469	1.04302
1019171907101550766-1	-6.23177	0.907051
1.01917e+18	-6.42713	0.96532
1.01917e+18	-6.71455	1.05026
1.01917e+18	-6.6048	1.10619
1.01917e+18	-6.17564	0.771529
1019171907101540059-1	-6.4427	0.975716
1019171907101890050-1	-6.23907	0.839132
1019171907101550295-3	-6.29589	0.62597
1019171907101720290-1	6.93644	-0.356991
1019171907101710067-3	-6.38499	0.951792
1019171907101540193-1	-6.67994	1.18754
1019171907101550523-1	-6.33813	0.901548
1.01917e+18	-6.44443	0.661162
1.01917e+18	-7.04321	0.262842
1.01917e+18	-7.02402	0.276387
1.01917e+18	-7.01248	0.26984
1019171907101710130-1	-6.91107	0.408057
1.01917e+18	-6.98605	0.321304
1019171907101540046-1	-7.03847	0.268422
1019171907101540084-2	-6.9617	0.321887
1019171907101540170-1	-2.44954	-14.1294
1.01917e+18	-2.47047	-14.2421
1.01917e+18	-3.37307	-16.1927
1019171907101540062-1	-3.18846	-15.257
1019171907101540125-1	-3.40018	-16.5812
1.01917e+18	-3.21429	-16.2775
1.01917e+18	-3.17358	-16.0579
1.01917e+18	-3.06184	-15.0229
1019171907101540243-1	-3.20937	-17.3572
1019171907101550298-3	-3.14599	-14.8758
1019171907101710036-3	-3.15887	-18.049
1019171907101710068-3	-3.31896	-16.944
1.01917e+18	-3.46093	-16.2723
1019171907101710200-1	-3.14136	-15.397
1019171907101710206-2	-3.25187	-16.4139
1019171907101710208-2	-3.21653	-17.5428
1019171907101710218-2	-3.27002	-15.8892
1019171907101710222-2	-3.29814	-16.3506
1.01917e+18	-2.09945	-15.1723
1019171907101710239-1	-3.15483	-15.1569
1019171907101710240-2	-3.09115	-15.0142
1019171907101710246-1	-3.28732	-16.2101
1019171907101710282-2	-3.24115	-15.5143
1019171907101710254-1	-3.34429	-16.4383
1019171907101540036-2	-3.227	-17.1626
1.01917e+18	-3.26262	-17.3625
1019171907101540231-1	-3.19959	-17.6046
1019171907201540088-1	-3.3497	-16.534
1.01917e+18	-3.21964	-17.4167
1019171907101710185-1	-2.13813	-15.1604
1.01917e+18	-3.14518	-15.4464
1019171907101540052-2	-3.19982	-17.8871
1019171907101540096-1	-2.4387	-15.1412
1019171907101540197-1	-3.14953	-17.8058
1.01917e+18	-3.19741	-16.1486
1.01917e+18	-3.48086	-16.3897
1.01917e+18	-3.2848	-17.0239
1019171907101710070-2	-2.05377	-14.9916
1019171907101710210-1	-3.2786	-16.1808
1019171907101710281-1	-3.35928	-16.7681
1.01917e+18	-3.03701	-14.7172
1.01917e+18	-3.25095	-17.3047
1019171907101540145-1	-3.26601	-16.0743
1.01917e+18	-3.43433	-16.5892
1.01917e+18	-3.26348	-17.3818
1019171907101540217-1	-2.15504	-14.9758
1019171907101540230-1	-3.31535	-16.8182
1019171907101550120-1	-3.22961	-14.6215
1019171907101540131-1	-2.17942	-15.0947
1019171907101540068-1	-3.46501	-16.4736
1019171907101540070-2	-2.22722	-15.2769
1019171907101710078-2	-3.19582	-15.1077
1019171907101710127-1	-3.38609	-16.3902
1019171907101710221-1	-3.27624	-17.0816
1019171907101710233-1	-3.49408	-16.4459
1019171907101540138-1	-3.31498	-16.6402
1019171907101540091-1	-3.18767	-15.6689
1019171907101890041-1	-2.00829	-14.7219
1019171907101540132-1	-2.31869	-15.0414
1019171907101710220-2	-3.43782	-16.4682
1019171907101710191-2	-2.9824	-15.5024
1.01917e+18	-2.11797	-15.12
1019171907101550763-1	-2.4411	-14.5984
1019171907101550248-2	-3.04326	-15.307
1.01917e+18	-3.11794	-14.5852
1019171907101710260-1	-3.20625	-14.7758
1019171907101710144-1	-3.17229	-14.6597
1.01917e+18	-2.818	-14.3787
1019171907101550171-2	-2.52317	-14.5754
1.01917e+18	-2.82336	-14.4329
1019171907101730156-2	-2.19353	-14.5017
1019171907101550876-1	-2.0436	-14.9268
1.01917e+18	-2.35395	-14.3345
1019171907101550682-1	-2.33031	-14.5236
1019171907101710212-2	-2.03927	-14.7113
1.01917e+18	-2.28867	-14.2556
1.01917e+18	-3.16263	-14.9916
1.01917e+18	-3.21002	-14.8404
1.01917e+18	-2.08294	-15.137
1.01917e+18	-2.12657	-14.6798
1.01917e+18	-2.57933	-14.9548
1.01917e+18	-2.93405	-14.3912
1.01917e+18	-3.13312	-14.8543
1019171907101550106-3	-3.03732	-14.5148
1.01917e+18	-2.25581	-14.7153
1019171907101710228-2	-10.7405	-2.61262
1019171907101710302-2	-2.80148	-14.3601
1019171907101720479-1	-3.04336	-14.4038
1.01917e+18	-2.23053	-14.4666
1019171907101540250-1	-2.14424	-14.5977
1.01917e+18	-2.45804	-14.3956
1.01917e+18	-9.2357	-8.0839
1019171907101550199-2	4.06415	-2.66414
1019171907101550827-1	-11.8471	-3.80341
1.01917e+18	-11.4009	-2.64807
1019171907101560417-2	-9.48039	-6.99606
1019171907101560564-1	2.06839	4.95983
1.01917e+18	-10.5333	-1.41048
1.01917e+18	-9.14262	-8.27077
1.01917e+18	-9.43802	-7.43568
1019171907101710059-2	-10.6516	-2.53133
1019171907101710089-1	-11.7729	-3.52612
1019171907101710189-1	-11.1207	-3.0242
1019171907101720093-1	-9.96551	-6.61794
1019171907101720586-1	-9.81897	-6.71669
1019171907101720607-1	-9.49207	-7.59637
1.01917e+18	-9.57896	-6.97884
1019171907101550143-2	-9.16348	-8.24443
1019171907101720611-1	-11.5252	-4.50751
1.01917e+18	-10.9873	-3.07715
1019171907101550244-3	-11.7203	-4.27749
1019171907101550552-2	-11.3998	-3.24484
1.01917e+18	-11.4544	-4.41994
1.01917e+18	-11.6421	-4.2624
1019171907101560543-1	-11.7816	-4.11545
1019171907101710251-2	-11.0834	-5.28751
1019171907101710291-2	-10.9954	-5.38841
1019171907101720151-1	-10.7913	-5.63876
1019171907101720261-1	-10.692	-2.54206
1019171907101720510-1	-10.1135	-6.41624
1019171907101720550-1	-11.6963	-4.39892
1019171907101550122-1	-9.77299	-6.92611
1019171907101550168-3	-11.4733	-2.56119
1019171907101550215-2	-11.7996	-3.31168
1019171907101550883-1	-11.6634	-4.56121
1.01917e+18	-11.4157	-4.78077
1.01917e+18	-11.581	-2.72531
1019171907101710196-1	-11.6844	-4.60297
1019171907101720604-1	-11.5119	-4.49937
1019171907101730292-2	-9.9906	-6.54969
1019171907101720497-1	-11.6135	-4.45857
1019171907101550845-1	-11.848	-3.30196
1.01917e+18	-11.898	-3.92018
1019171907101710138-2	-11.1396	-3.17668
1019171907101550214-2	-9.27312	-7.99952
1019171907101560300-3	-9.37734	-7.21288
1019171907101560405-3	-11.3245	-2.54574
1019171907101560467-2	-9.45834	-7.5093
1.01917e+18	-9.36556	-7.91756
1.01917e+18	-9.43328	-7.48891
1019171907101720336-2	-11.6222	-3.117
1019171907101720432-2	-11.2953	-2.31792
1019171907101720544-1	-9.91277	-6.85485
1.01917e+18	-9.65122	-7.1171
1.01917e+18	-9.59047	-7.00084
1.01917e+18	-9.23057	-8.17385
1019171907101550228-2	-11.4912	-2.5378
1019171907101550236-3	-11.4179	-4.74211
1019171907101550887-1	-21.977	7.44439
1019171907101710155-1	-10.93	-5.45932
1.01917e+18	-9.39741	-7.26103
1019171907101710011-1	-11.3639	-2.35378
1.01917e+18	-9.49929	-7.19144
1019171907101540265-1	-11.5956	-3.61683
1019171907101540207-1	-11.5362	-3.88842
1019171907101550603-1	-11.5021	-2.55375
1.01917e+18	10.3626	7.19324
1.01917e+18	-11.815	-3.20833
1.01917e+18	-9.32567	-8.0246
1019171907101720508-1	-11.4823	-2.40867
1.01917e+18	-9.34963	-7.68034
1.01917e+18	-11.754	-3.22585
1.01917e+18	-11.6711	-3.26845
1019171907101550676-1	-6.73365	0.921842
1.01917e+18	-9.45551	-7.74998
1019171907101720543-1	-11.4341	-4.75828
1019171907101550879-1	-11.1219	-5.23064
1019171907101550326-2	-11.5083	-3.04074
1019171907101550660-1	-11.7234	-4.15711
1019171907101560522-1	-9.70867	-7.04202
1019171907101550070-3	-11.2735	-4.9735
1.01917e+18	-10.7238	-2.84714
1019171907101540181-1	-10.9427	-3.08151
1019171907101550367-3	-11.8182	-4.05548
1019171907101710213-2	-11.8709	-3.40744
1019171907101720554-1	-10.937	-3.06686
1.01917e+18	-11.2421	-2.33265
1019171907101720563-1	-10.1177	-6.41286
1019171907101720400-1	-11.605	-4.50934
1019171907101720553-1	-11.1369	-5.21578
1.01917e+18	-10.6139	-1.3571
1019171907101550141-3	-22.1167	7.47892
1019171907101710083-2	-10.5469	8.83041
1.01917e+18	-21.3751	7.99052
1.01917e+18	-22.4775	7.89061
1.01917e+18	-21.5309	8.07267
1.01917e+18	-21.7602	7.71365
1.01917e+18	-21.676	7.72153
1.01917e+18	-21.7871	7.8818
1.01917e+18	-21.7418	7.64955
1.01917e+18	-22.2013	7.6716
1.01917e+18	-22.3014	7.60794
1.01917e+18	-21.5055	7.88319
1.01917e+18	-21.3179	8.03723
1.01917e+18	-22.2806	7.64104
1.01917e+18	-22.2817	7.65413
1.01917e+18	-22.3108	7.48593
1.01917e+18	-21.7909	7.74454
1.01917e+18	-21.6668	7.94895
1.01917e+18	-22.1293	7.73493
1.01917e+18	-21.7755	7.7993
1.01917e+18	-21.808	8.0791
1.01917e+18	-21.5181	7.86892
1.01917e+18	-21.7166	7.92387
1.01917e+18	-22.4464	7.85202
1.01917e+18	-21.6776	7.78372
1.01917e+18	-21.7207	7.90463
1.01917e+18	-22.2879	7.5212
1.01917e+18	-21.3792	7.92678
1.01917e+18	-22.4529	7.95982
1.01917e+18	-21.4564	8.1167
1.01917e+18	-22.3143	7.78375
1.01917e+18	-21.6027	7.83427
1.01917e+18	-21.6073	8.10263
1.01917e+18	-22.2941	7.57239
1.01917e+18	-21.5602	7.78265
1.01917e+18	-22.4658	7.96417
1.01917e+18	-21.3769	8.1965
1.01917e+18	-22.2184	7.66858
1.01917e+18	-21.4837	7.83936
1.01917e+18	-21.4695	8.17144
1.01917e+18	-22.4739	7.94636
1.01917e+18	-21.593	7.85544
1.01917e+18	-21.5645	8.07031
1.01917e+18	-21.4252	7.70938
1.01917e+18	-22.052	7.55621
1019171907101730018-1	-21.786	7.627
1.01917e+18	-21.7644	8.04173
1019171907101730020-1	-22.3136	7.71275
1.01917e+18	-22.4658	7.88908
1019171907101730041-2	-22.125	7.79632
1.01917e+18	-21.3572	7.99333
1.01917e+18	-22.0115	7.75593
1.01917e+18	-22.5135	7.93656
1.01917e+18	-22.5867	7.93901
1.01917e+18	-21.494	7.95434
1.01917e+18	-21.4794	7.88572
1.01917e+18	-21.9285	7.56654
1.01917e+18	-21.8836	7.6427
1.01917e+18	-21.3558	8.02103
1.01917e+18	-6.24389	0.657676
1019171907101550299-3	7.35693	0.0540661
1.01917e+18	-9.83958	-6.78752
1.01917e+18	-2.07391	-14.6788
1.01917e+18	-3.27526	-18.1907
1.01917e+18	-3.18742	-18.0855
1.01917e+18	-3.14581	-18.0684
1019171907101550148-1	-3.18575	-18.2162
1.01917e+18	-3.26877	-18.1882
1019171907101540169-1	-3.22075	-18.1563
1019171907101710271-1	-18.31	3.37463
1019171907101710238-2	-3.355	-18.2811
1019171907101710149-1	-3.12336	-18.0522
1019171907101710094-1	-3.18417	-17.9566
1.01917e+18	-3.22124	-18.127
1019171907101710187-2	-3.26964	-18.2061
1019171907101540103-1	-3.33182	-18.2633
1.01917e+18	-3.15426	-18.135
1.01917e+18	-3.28054	-18.1786
1019171907101710178-1	-3.15004	-18.0342
1019171907101540119-1	-2.29427	-14.1508
1.01917e+18	-2.36908	-14.1467
1019171907101720465-1	-2.304	-14.0417
1019171907101710081-2	-2.41769	-14.0465
1.01917e+18	-2.30422	-14.0898
1.01917e+18	-2.37655	-14.1754
1.01917e+18	-2.85141	-15.0996
1.01917e+18	-2.22066	-14.4824
1.01917e+18	-2.06683	-14.6069
1019171907101710145-1	-2.01652	-14.6832
1.01917e+18	-1.95281	-14.6136
1019171907101710175-2	-2.40887	-14.4864
1019171907101540226-1	-3.13676	-14.6214
1019171907101550582-2	2.21495	6.56175
1.01917e+18	1.55377	6.47901
1.01917e+18	2.37637	6.41142
1.01917e+18	4.74754	8.42095
1.01917e+18	-13.0177	-10.5069
1019171907101550567-1	1.64929	8.372
1019171907101720444-1	2.15171	6.63008
1019171907101550638-1	1.53465	7.47164
1019171907101560568-1	2.38896	4.76709
1019171907101730336-2	0.477157	-8.19096
1.01917e+18	1.73189	7.4018
1019171907101720172-2	1.64851	7.67821
1019171907101720140-2	4.80325	8.33163
1.01917e+18	1.31689	6.71357
1.01917e+18	-12.6949	-11.0346
1.01917e+18	4.64247	7.76219
1.01917e+18	-12.8027	-10.7681
1019171907101730219-1	-0.644823	-8.4638
1.01917e+18	-12.7259	-11.0096
1019171907101720569-1	-0.733981	-7.10704
1.01917e+18	3.51171	4.45671
1019171907101550308-3	3.57896	4.69077
1019171907101560514-2	2.79502	4.64737
1019171907101720239-2	3.19878	4.21868
1.01917e+18	5.65483	7.54026
1.01917e+18	3.62394	4.96989
1019171907101720220-2	3.09354	4.87032
1019171907101560484-2	3.03775	4.63115
1.01917e+18	-12.7324	-10.9356
1019171907101720368-2	3.97701	4.78839
1.01917e+18	2.81957	4.44779
1019171907101560482-2	3.16221	4.23511
1019171907101560549-1	3.24493	4.22745
1.01917e+18	-0.553673	-8.45254
1.01917e+18	-12.6937	-11.0416
1019171907101550521-2	4.10026	4.68776
1.01917e+18	1.59395	8.14955
1019171907101560551-1	3.01618	4.26576
1019171907101720275-1	1.45898	6.96921
1.01917e+18	-12.7112	-10.8792
1019171907101720142-1	1.34062	7.12118
1019171907101550231-2	2.98507	5.10471
1019171907101720331-1	1.41003	6.71887
1.01917e+18	1.56105	5.89678
1019171907101550693-1	1.11493	7.5941
1019171907101550777-1	2.65622	5.99894
1.01917e+18	1.37297	7.42868
1019171907101720330-1	2.26445	6.60541
1019171907101730289-1	3.07152	4.49816
1019171907101720342-1	0.633629	-8.48019
1019171907101720260-1	2.35106	6.37416
1019171907101550824-1	1.41673	6.9817
1.01917e+18	2.03876	8.19904
1.01917e+18	2.8295	8.59456
1019171907101550708-1	1.87927	7.12936
1019171907101720410-1	3.42442	4.97794
1019171907101720416-2	3.52596	4.50449
1019171907101730259-2	2.7678	4.39037
1019171907201560356-1	4.15885	4.56848
1019171907101550628-1	4.35152	4.96768
1019171907101720404-1	1.60543	7.51389
1019171907101560485-2	2.01949	8.01306
1019171907101720321-1	2.99269	4.33424
1019171907101550222-2	3.8733	4.41504
1.01917e+18	1.81843	8.26497
1019171907101560454-3	1.85726	5.14824
1019171907101720279-2	1.65215	8.27137
1019171907101560457-2	1.67408	7.6692
1.01917e+18	2.33713	-9.61923
1019171907101560428-3	2.46504	6.30975
1019171907101550548-1	2.47546	6.61435
1019171907101550786-1	1.47192	7.4648
1019171907101720271-1	2.4287	6.32518
1019171907101550491-2	2.49379	6.2099
1.01917e+18	-12.7011	-11.103
1019171907101550144-2	1.86324	6.74544
1.01917e+18	-24.3917	12.397
1.01917e+18	1.46492	7.27114
1.01917e+18	-0.602156	-8.45651
1019171907101560424-2	2.96083	4.32002
1019171907101720377-1	1.58843	8.46443
1019171907101550721-1	2.79456	5.67839
1.01917e+18	1.94975	8.00875
1.01917e+18	-13.0909	-10.6075
1019171907101720585-1	1.1532	7.34427
1019171907101550715-1	1.51454	7.34069
1019171907101560434-3	1.44063	8.08078
1019171907101560452-1	2.29635	6.32771
1019171907101560494-1	1.20941	7.2929
1.01917e+18	-0.562381	-8.58849
1.01917e+18	2.95066	5.55322
1019171907101730238-1	2.32214	6.34949
1019171907101890060-2	-13.0343	-10.5434
1019171907101560586-1	1.21249	6.97541
1019171907101550643-1	1.27248	7.65144
1019171907101550203-1	1.78515	7.57688
1.01917e+18	-12.8901	-10.6651
1019171907101720272-2	1.3565	7.31401
1019171907101890069-2	-13.0109	-10.4782
1.01917e+18	-12.9966	-11.0874
1019171907101550197-1	-12.9878	-11.1281
1019171907101730324-2	-0.466813	-8.62393
1019171907101550219-2	-13.0404	-11.1247
1.01917e+18	-13.8322	-11.0309
1019171907101720385-2	4.40844	7.67197
1019171907101550608-2	5.28861	7.31385
1019171907101550773-1	4.76351	7.70497
1.01917e+18	5.08465	7.27048
1019171907101550575-1	4.70841	7.50696
1019171907101720383-2	4.28719	8.89507
1019171907101730257-2	-0.384875	-8.7351
1.01917e+18	-12.7537	-11.0326
1.01917e+18	-13.0131	-10.514
1.01917e+18	-13.0163	-10.5309
1.01917e+18	2.26369	4.36752
1.01917e+18	-13.2911	-11.0728
1.01917e+18	-2.93412	-9.07745
1019171907101890031-2	-12.6726	-10.8663
1.01917e+18	-12.8521	-11.141
1019171907101730236-2	-0.422481	-8.73503
1019171907101720070-1	4.33143	8.59242
1019171907101720124-2	-22.4215	7.72171
1019171907101550769-1	5.42706	7.75046
1.01917e+18	3.65223	8.7167
1.01917e+18	-1.34429	-7.67038
1.01917e+18	-0.493319	-8.76387
1.01917e+18	-3.34777	-8.75787
1019171907101730279-1	-0.367688	-8.73045
1.01917e+18	-0.179169	-5.65343
1019171907101550257-2	-0.346833	-6.14706
1019171907101720433-2	5.02956	7.91962
1019171907101550580-1	3.18341	8.72515
1019171907101550546-2	4.20062	8.01855
1019171907101550234-2	4.24034	7.93258
1.01917e+18	-14.1079	-10.9188
1019171907101550226-1	-0.701199	-7.0569
1.01917e+18	-3.18947	-8.59173
1019171907101730140-2	-3.32366	-8.56252
1.01917e+18	4.82056	7.40742
1019171907101550246-2	5.24812	7.22619
1.01917e+18	4.69734	7.49729
1.01917e+18	2.17745	4.27293
1.01917e+18	-2.85533	-8.98114
1019171907101560671-1	-2.92723	-9.0123
1019171907101720118-1	5.05241	7.963
1.01917e+18	-0.631678	-5.96013
1.01917e+18	-0.555933	-6.84383
1.01917e+18	-1.3883	-7.04136
1019171907101730090-2	-3.26592	-8.48815
1.01917e+18	-1.02162	-6.57737
1.01917e+18	-12.9689	-10.5655
1019171907101550732-1	5.0278	7.1379
1.01917e+18	3.09311	8.73317
1.01917e+18	-12.7983	-10.924
1019171907101730295-2	0.426905	-8.03553
1019171907101730233-2	0.356606	-7.20435
1019171907101720549-1	-0.711809	-7.00584
1.01917e+18	-0.700849	-8.21014
1.01917e+18	-0.677514	-8.30686
1019171907101550811-1	4.47587	7.557
1019171907101550163-2	3.49684	8.96008
1.01917e+18	-14.0034	-10.8819
1.01917e+18	-3.27312	-9.27946
1.01917e+18	-0.660344	-8.28206
1.01917e+18	-0.703629	-8.1359
1.01917e+18	-0.505811	-6.31425
1019171907101550320-2	-0.684736	-6.3475
1019171907101710219-1	-1.03125	-7.18579
1019171907101730452-2	-0.583321	-7.02357
1019171907101550112-3	-0.626071	-6.9566
1019171907101730247-2	0.366204	-7.29645
1019171907101730489-1	-1.31661	-7.03812
1019171907101720212-1	-2.97902	-8.94075
1019171907101720092-1	-3.04778	-9.07558
1019171907101560623-1	-3.24587	-9.22489
1.01917e+18	-2.96771	-9.05545
1019171907101730142-2	-3.1084	-8.99226
1.01917e+18	-3.25561	-8.62911
1.01917e+18	2.65792	4.55154
1.01917e+18	-0.374482	-8.89084
1019171907101710324-2	-14.027	-10.8356
1019171907101730159-2	-13.8117	-10.9114
1.01917e+18	-3.25012	-8.91238
1019171907101730087-2	-3.2353	-8.98623
1019171907101560643-1	-3.19743	-8.48526
1.01917e+18	5.88247	6.93577
1019171907101720389-1	5.5643	7.5882
1019171907101720481-2	-2.97497	-8.87079
1019171907101720065-1	-3.3144	-9.24203
1019171907101560584-1	-3.2348	-9.24589
1019171907101550857-1	-3.32487	-9.31707
1019171907101720338-1	6.50862	9.33293
1019171907101720287-2	7.21807	9.21331
1019171907101720141-2	1.06653	8.38862
1.01917e+18	4.48019	10.772
1019171907101550747-1	2.65377	10.003
1.01917e+18	6.33516	9.31316
1019171907101720182-2	8.32547	9.24629
1019171907101720325-1	3.60104	9.29482
1019171907101550578-2	8.21379	9.19731
1.01917e+18	3.60793	10.8333
1.01917e+18	4.64869	8.34916
1019171907101710288-2	-14.032	-10.9164
1.01917e+18	2.93297	-16.511
1.01917e+18	2.88985	-16.6709
1.01917e+18	-0.732534	-5.89282
1019171907101720566-1	-1.15799	-6.78178
1019171907101560441-2	-1.17307	-6.84061
1.01917e+18	-1.01724	-5.62924
1019171907101710311-1	-0.979535	-5.67389
1019171907101720588-1	-0.733149	-6.88242
1.01917e+18	-0.749367	-6.99846
1019171907101730276-2	-3.28322	-9.31603
1019171907101730183-1	-3.23709	-9.23833
1019171907101560507-1	-3.12327	-9.18749
1019171907101550155-2	-3.18189	-9.17592
1.01917e+18	-3.2588	-9.28436
1019171907101550462-1	-3.04178	-8.9401
1019171907101550098-3	0.136834	-7.29814
1019171907101560480-2	0.346279	-7.66967
1019171907101550181-1	1.76067	8.44595
1019171907101550691-1	-9.5512	2.8306
1019171907101550671-1	4.04127	8.38756
1.01917e+18	4.95028	7.9782
1019171907101550805-1	2.6225	9.37238
1.01917e+18	5.04287	7.87598
1019171907101720524-1	5.10328	7.36674
1019171907101550623-2	5.33368	7.45693
1019171907101550174-3	3.91461	8.54319
1019171907101550663-1	4.54217	8.96266
1.01917e+18	3.87166	8.76791
1019171907101550597-1	4.50704	7.68303
1019171907101720210-1	2.24711	7.20276
1019171907101730264-2	-0.269723	-7.54382
1019171907101730302-2	0.0248175	-7.44252
1019171907101720574-1	2.69204	-16.7839
1019171907101720523-1	2.69633	-16.7686
1.01917e+18	-1.06645	-5.55031
1019171907101710270-2	-0.802079	-5.73371
1019171907101560390-3	-0.869712	-6.46983
1.01917e+18	-1.37993	-6.98622
1.01917e+18	-1.26668	-6.96882
1019171907101720551-1	-1.16956	-6.76888
1019171907101720579-1	-1.2677	-6.91595
1.01917e+18	-1.06419	-6.65785
1019171907101720516-1	-0.928717	-6.44875
1019171907101710211-2	-0.141188	-5.52935
1019171907101550292-2	2.75835	-16.6854
1019171907101730527-1	2.84872	-16.667
1.01917e+18	2.82625	-16.6865
1019171907101550212-1	2.86402	-16.572
1.01917e+18	2.78821	-16.7054
1.01917e+18	2.66617	-16.8032
1019171907101720584-1	2.84103	-16.5708
1019171907101550104-2	-0.957947	-5.74292
1019171907101560491-2	-0.78937	-5.76776
1.01917e+18	-0.758557	-5.75679
1019171907101710198-2	-0.971153	-5.68482
1019171907201550173-1	-0.720115	-5.91583
1019171907101560468-1	-1.01097	-5.70985
1019171907101550205-2	-1.02441	-5.64514
1019171907101710215-1	-0.829491	-5.77824
1019171907101710286-2	-1.02463	-5.64067
1019171907101560641-1	-14.0472	-11.1154
1.01917e+18	-14.0464	-11.1159
1.01917e+18	-13.9707	-10.9461
1.01917e+18	-13.9578	-11.0128
1.01917e+18	-14.1377	-10.9526
1.01917e+18	-0.124563	-6.54219
1019171907101720568-1	-0.2473	-6.65558
1019171907101720591-1	-0.659369	-5.93837
1019171907101550324-3	5.61318	9.9315
1019171907101720193-2	1.26375	8.47683
1019171907101550653-1	3.90499	11.052
1019171907101550683-1	4.10632	10.8562
1019171907101550745-1	1.48231	8.4178
1.01917e+18	3.29652	10.6297
1019171907101720423-1	7.66678	8.82107
1019171907101720356-1	4.03188	10.928
1019171907101720273-2	6.89609	9.20812
1.01917e+18	3.77991	11.244
1019171907101720241-2	4.50807	10.9416
1.01917e+18	2.50006	9.85091
1019171907101720393-1	5.74525	9.81254
1019171907101720201-1	0.355608	6.76122
1019171907101550656-1	5.09281	10.2171
1019171907101720197-2	6.7901	9.24746
1.01917e+18	3.1132	10.537
1019171907101550684-1	3.33622	10.9944
1019171907101720286-1	4.01711	11.2422
1019171907101720464-2	5.07594	10.5207
1.01917e+18	2.48328	9.8228
1019171907101550814-1	3.38672	10.6434
1.01917e+18	1.20897	8.05812
1019171907101720249-2	3.4002	11.181
1019171907101720415-1	5.45504	10.0872
1019171907101720077-1	5.01185	10.6138
1019171907101550498-1	5.24907	10.29
1019171907101550193-3	3.89933	8.97384
1019171907101720185-2	2.59059	9.97646
1019171907101550609-1	6.84164	9.18521
1019171907101550722-1	5.61137	9.95979
1019171907101720132-2	2.54577	9.87181
1019171907101720370-1	7.00014	9.2278
1.01917e+18	6.90691	9.22774
1019171907101550674-1	0.326411	7.28315
1019171907101720387-2	4.71219	10.8294
1019171907101550801-1	7.9608	9.02046
1.01917e+18	3.827	10.8781
1.01917e+18	5.18546	10.4413
1019171907101720147-2	3.62831	11.0848
1.01917e+18	2.56684	9.94667
1019171907101720388-1	4.25395	11.0936
1.01917e+18	5.32811	10.2068
1.01917e+18	2.6301	9.97153
1019171907101720265-2	-1.99573	-14.7122
1019171907101550393-2	5.59306	9.95786
1019171907101550281-2	3.56226	11.2072
1019171907101720116-1	1.14533	8.47895
1019171907101550261-2	4.22948	11.1369
1.01917e+18	8.36392	8.66323
1019171907101550360-2	6.50029	9.38631
1019171907101550490-2	10.4707	0.783706
1.01917e+18	6.9445	9.20373
1019171907101720376-2	5.116	10.5865
1019171907101550366-3	8.13648	9.09994
1019171907101720130-2	4.82193	10.8109
1019171907101550449-1	7.97038	8.21704
1019171907101720296-2	3.37726	11.1485
1019171907101560337-3	1.49051	8.37012
1019171907101550599-1	3.51299	9.01057
1019171907101550493-2	3.53779	11.1086
1019171907101720267-1	3.91125	11.2848
1.01917e+18	4.8196	10.7625
1019171907101550547-2	0.966919	8.80713
1.01917e+18	2.57331	9.52555
1019171907101720303-2	4.97028	10.5175
1019171907101550657-1	6.95127	9.13053
1019171907101550268-2	5.48817	10.0919
1019171907101720148-1	3.78528	11.2381
1019171907101720085-1	4.94023	10.6625
1019171907101550645-1	5.41773	10.1243
1019171907101550652-1	5.04399	10.5129
1019171907101550779-1	6.79237	9.29511
1.01917e+18	4.06633	10.9704
1019171907101720332-1	4.06292	11.1873
1.01917e+18	5.24815	10.3379
1.01917e+18	5.1974	9.95813
1019171907101720480-1	2.64854	9.46632
1.01917e+18	5.10142	10.4471
1019171907101720054-1	3.65633	9.00745
1019171907101720515-1	3.68691	10.9029
1.01917e+18	3.17297	10.4719
1.01917e+18	3.32574	10.5258
1.01917e+18	5.01293	8.08251
1019171907101720406-1	4.26118	7.91072
1.01917e+18	5.24229	7.92248
1.01917e+18	4.56907	8.47071
1019171907101550864-1	5.90174	7.22506
1019171907101550701-1	4.17125	7.96692
1019171907101720367-1	3.27834	9.01195
1.01917e+18	4.90413	8.16405
1019171907101720250-1	4.89095	7.36645
1019171907101550874-1	5.22208	7.11594
1.01917e+18	4.75078	8.57881
1.01917e+18	4.44422	8.51145
1.01917e+18	2.83667	9.22539
1.01917e+18	3.86418	8.79763
1.01917e+18	4.83482	7.62247
1019171907101720192-2	4.4391	8.78946
1019171907101720513-1	4.14964	8.0314
1.01917e+18	-0.676395	-8.88828
1019171907101550743-1	3.47795	11.0739
1.01917e+18	8.08595	8.85009
1019171907101720345-1	4.09721	11.1847
1019171907101550187-3	3.47928	10.8431
1.01917e+18	4.56304	10.984
1019171907101550527-1	4.70373	9.22385
1.01917e+18	4.72135	10.8597
1019171907101720245-2	3.4485	11.1357
1.01917e+18	-13.7249	-11.0188
1019171907101890021-1	-12.9192	-10.6152
1.01917e+18	-12.8419	-10.8577
1019171907101720154-2	3.14776	10.6918
1019171907101550594-2	4.68147	10.8678
1019171907101720439-1	7.08929	8.50496
1019171907101550717-1	2.61363	9.93926
1019171907101550129-3	0.864858	8.79252
1019171907101550764-1	1.35173	8.33229
1019171907101550726-1	5.17753	10.3506
1019171907101550742-1	4.39145	11.0207
1019171907101550718-1	3.73704	11.2066
1019171907101720474-1	4.03682	11.0901
1019171907101720301-2	3.49371	10.6799
1019171907101550600-2	5.00154	10.0879
1.01917e+18	6.52728	9.33116
1.01917e+18	1.06663	8.54169
1019171907101720298-1	3.40005	10.7567
1.01917e+18	5.17397	7.09126
1.01917e+18	5.55148	7.32438
1019171907101550501-2	4.84143	7.41986
1.01917e+18	4.20129	7.95458
1019171907101720216-2	3.17871	8.6551
1019171907101720384-1	4.28714	7.84091
1.01917e+18	4.85831	7.93048
1019171907101720499-2	5.33496	7.0392
1.01917e+18	4.21161	7.91815
1.01917e+18	5.17027	7.10491
1019171907101720535-1	2.29746	6.87918
1019171907101730524-2	0.02618	-9.1818
1.01917e+18	-13.9936	-10.9704
1.01917e+18	-0.232237	-8.96539
1019171907101550520-1	5.30282	7.90506
1.01917e+18	1.79728	-10.4384
1.01917e+18	1.51338	-10.1624
1.01917e+18	-0.276906	-6.83485
1019171907101730371-2	0.551506	-8.46573
1.01917e+18	2.35797	-10.827
1019171907101730347-2	1.17212	-9.96128
1019171907101730393-1	-3.07506	-8.39893
1.01917e+18	8.33933	9.25922
1019171907101720359-1	4.878	10.7081
1.01917e+18	5.16655	10.3403
1.01917e+18	3.38304	11.073
1019171907101720066-2	2.5683	9.86786
1019171907101550218-2	4.29147	11.1478
1019171907101550692-1	3.72528	11.254
1019171907101720461-2	6.21829	9.51195
1.01917e+18	4.6767	10.8668
1.01917e+18	4.18876	11.0388
1019171907101720360-1	2.04917	8.00983
1.01917e+18	5.77167	6.80445
1.01917e+18	4.74311	8.27269
1.01917e+18	4.31475	7.83396
1019171907101720194-1	4.63676	8.77999
1.01917e+18	5.64883	6.77639
1.01917e+18	2.85561	8.55175
1019171907101550810-1	4.07982	8.532
1019171907101730423-1	-0.384239	-8.86331
1019171907101730311-2	-0.35664	-8.80993
1019171907101730241-2	0.287538	-7.32801
1019171907101560620-1	0.175102	-7.34791
1.01917e+18	-2.97844	-8.12966
1.01917e+18	-2.98962	-8.18802
1019171907101720097-1	-3.0442	-8.14929
1.01917e+18	-0.766083	-8.81277
1019171907101730563-2	-0.848639	-8.83326
1.01917e+18	-0.757749	-8.78229
1.01917e+18	-13.8954	-10.8538
1.01917e+18	-13.5932	-10.9157
1.01917e+18	0.299021	-9.70439
1019171907101550087-3	-14.094	-11.0279
1019171907101730408-2	-14.1598	-10.9778
1.01917e+18	-14.0077	-10.974
1019171907101550571-1	-2.80292	-8.54778
1019171907101710264-1	-1.64533	-7.76636
1.01917e+18	-0.685425	-5.85559
1019171907101550443-1	10.4283	1.29048
1019171907101720443-1	5.10588	5.4695
1.01917e+18	4.07815	5.04943
1.01917e+18	0.776944	7.20559
1.01917e+18	0.803153	8.8639
1019171907101720306-2	0.41795	7.55904
1.01917e+18	0.708153	7.64106
1.01917e+18	0.392471	6.74734
1.01917e+18	0.766419	8.71245
1.01917e+18	0.396836	7.47996
1019171907101720082-1	0.829448	8.78095
1.01917e+18	0.741305	8.80516
1.01917e+18	6.82675	8.77004
1.01917e+18	0.698326	7.9047
1019171907101550877-1	0.834966	6.85905
1019171907101550235-2	0.924932	8.83271
1019171907101720083-2	0.681267	7.41135
1019171907101550889-1	0.460467	7.01952
1019171907101550124-3	0.72712	8.67985
1019171907101550868-1	0.709259	8.57654
1019171907101720084-1	0.688463	7.61004
1019171907101560565-1	0.759308	8.46324
1019171907101560574-1	0.959217	5.78016
1019171907101720101-2	0.955664	5.47781
1019171907101720258-1	0.70271	6.79609
1019171907101720160-2	1.07779	8.45514
1019171907101730178-2	0.728691	8.73317
1019171907101720571-1	0.710374	8.5383
1019171907101720318-2	0.446432	7.67841
1019171907101720183-1	0.329519	7.08082
1.01917e+18	0.649948	8.61596
1019171907101550672-1	0.366762	6.91198
1019171907101720128-1	0.80843	8.70451
1019171907101720259-1	0.87761	8.79971
1019171907101550768-1	10.6264	0.816821
1019171907101550238-2	8.95579	8.43458
1019171907101550375-1	11.7065	3.82072
1.01917e+18	8.45956	1.14851
1019171907101550237-2	9.85561	8.38286
1.01917e+18	9.57019	9.20039
1019171907101720255-1	11.7665	4.20344
1.01917e+18	4.79554	8.54279
1.01917e+18	9.39197	8.91999
1019171907101550239-2	10.1185	7.64739
1019171907101720099-1	9.93574	9.40403
1.01917e+18	7.89105	8.40394
1019171907101550247-2	11.3542	4.86591
1019171907101540269-1	10.2219	8.6133
1.01917e+18	7.62926	8.25309
1.01917e+18	11.5843	4.58611
1.01917e+18	7.89406	8.32912
1.01917e+18	9.9353	8.69217
1019171907101720113-2	10.1218	8.79518
1019171907101550488-2	9.7722	9.40303
1.01917e+18	6.77061	7.67656
1.01917e+18	3.76834	8.89402
1019171907101550495-1	10.3465	6.44612
1019171907101550264-3	11.766	4.2395
1019171907101550661-1	8.67109	9.36183
1019171907101710080-1	8.15453	8.04442
1019171907101550379-3	9.96748	7.32779
1019171907101720145-1	9.52786	8.72821
1019171907101550266-3	11.6703	4.06315
1019171907101550409-1	11.4915	4.5451
1.01917e+18	8.93837	8.107
1.01917e+18	10.3183	9.4601
1019171907101540133-1	5.51559	-2.19062
1019171907101710160-1	11.7185	4.28029
1019171907101720112-1	8.38481	9.31094
1019171907101710075-3	11.2327	5.25377
1.01917e+18	10.1598	8.58697
1019171907101540104-1	10.4563	6.32316
1019171907101710055-2	10.4225	6.455
1.01917e+18	6.76494	7.52455
1019171907101550217-2	11.6655	3.46437
1.01917e+18	10.3084	9.49943
1.01917e+18	8.13457	8.48403
1019171907101550358-3	11.277	5.19153
1019171907101720126-2	11.477	4.54032
1.01917e+18	10.2539	1.73338
1.01917e+18	10.3302	9.27185
1019171907101710076-3	11.7542	3.84358
1019171907101550350-3	7.12584	-0.162669
1.01917e+18	8.36619	9.121
1.01917e+18	11.4308	4.94602
1.01917e+18	10.9843	1.14705
1019171907101710152-1	7.73508	7.95981
1019171907101550241-1	11.426	5.00584
1019171907101550499-2	11.8109	4.14668
1.01917e+18	10.9849	1.39921
1019171907101550532-1	1.23772	8.05321
1019171907101550213-2	3.45533	9.07354
1.01917e+18	7.28669	9.15165
1.01917e+18	-13.1718	-10.6631
1019171907101560567-1	0.49531	-8.0754
1019171907101720105-1	-0.532223	-6.10804
1019171907101550300-2	-0.461718	-6.22117
1.01917e+18	-13.6548	-10.9436
1019171907101720578-1	-1.34595	-7.84772
1019171907101550775-1	0.711818	7.25271
1019171907101550780-1	0.346247	6.98494
1019171907101730404-2	1.10425	6.36922
1.01917e+18	0.44702	6.58206
1.01917e+18	0.717316	7.29098
1019171907101550866-1	0.774368	8.64948
1.01917e+18	0.642252	7.47375
1019171907101550826-1	1.15596	6.11492
1019171907101550861-1	0.615226	7.44037
1019171907101550832-1	0.771288	8.41867
1019171907101720411-2	7.77754	8.11179
1019171907101720146-1	9.15708	8.72428
1019171907101540278-1	9.65004	8.41102
1019171907101540270-1	10.3186	9.49714
1019171907101720152-2	10.3573	6.40961
1.01917e+18	7.97869	9.17415
1.01917e+18	7.89802	8.38107
1.01917e+18	6.9554	7.97931
1019171907101550376-3	10.0402	8.92756
1019171907101720252-2	8.9173	9.24113
1019171907101550492-1	8.40734	9.28443
1.01917e+18	9.72431	8.56951
1019171907101540279-1	10.4162	8.87085
1.01917e+18	10.2265	9.34468
1019171907101550494-2	11.3915	4.92632
1019171907101550497-2	8.90839	1.61484
1019171907101550254-2	6.15192	6.9314
1.01917e+18	6.73988	8.43109
1.01917e+18	10.0447	9.43655
1019171907101550675-1	8.02188	8.04005
1.01917e+18	6.80135	8.23593
1019171907101720396-2	11.0939	1.39751
1.01917e+18	9.97647	1.93875
1019171907101550713-1	9.94349	9.12845
1.01917e+18	11.3008	5.07466
1019171907101550504-2	11.4291	5.17977
1.01917e+18	9.43855	1.86706
1019171907101540275-1	9.95327	8.86349
1.01917e+18	9.11842	8.29576
1.01917e+18	9.88582	1.9243
1019171907101720412-2	6.78118	8.32694
1.01917e+18	10.4053	6.40794
1.01917e+18	6.94653	8.93023
1019171907101720430-1	7.65629	8.3113
1.01917e+18	6.55224	8.35917
1019171907101550516-2	8.38876	9.08663
1019171907101550371-3	7.97526	8.37709
1019171907101550707-1	6.70773	8.2843
1.01917e+18	9.83783	8.71315
1.01917e+18	9.25495	9.22578
1019171907101720253-2	8.42447	9.23334
1.01917e+18	10.4116	9.04177
1019171907101550519-1	11.0751	1.4214
1.01917e+18	7.35552	8.19305
1019171907101720391-1	10.4479	0.708312
1019171907101540088-1	11.6795	3.61864
1019171907101550356-2	8.92878	8.28617
1.01917e+18	11.5118	4.54014
1.01917e+18	9.80571	9.37093
1.01917e+18	10.2384	9.55781
1019171907101550232-2	6.19552	-1.34037
1.01917e+18	9.15367	1.76636
1019171907101550522-2	10.3328	7.36207
1.01917e+18	10.3846	6.3956
1.01917e+18	10.2866	9.25144
1.01917e+18	-13.4301	-10.7536
1.01917e+18	2.79208	-16.6739
1019171907101550369-3	2.76251	-16.7357
1.01917e+18	2.81258	-16.6351
1019171907101720434-2	2.71036	-16.7334
1019171907101550176-1	2.81277	-16.666
1.01917e+18	2.62672	-16.8361
1019171907101560308-1	2.848	-16.601
1019171907101550113-2	2.65919	-16.8002
1019171907101550642-1	2.69877	-16.7557
1019171907101550224-3	-0.165813	-9.73137
1019171907101550186-3	-0.196011	-9.76771
1.01917e+18	-0.131391	-9.7307
1.01917e+18	-0.124791	-9.70668
1019171907101720593-1	-0.0772039	-9.78283
1.01917e+18	-0.288417	-9.79642
1.01917e+18	-0.147471	-9.71655
1019171907101550267-2	-0.0863618	-9.67524
1.01917e+18	2.15793	-9.63008
1019171907101720137-1	2.33566	-9.95084
1.01917e+18	2.41575	-9.76958
1.01917e+18	2.07598	-9.58607
1019171907101730456-2	1.70161	-9.65956
1019171907101730541-2	1.9544	-9.6694
1.01917e+18	1.94824	-10.2986
1.01917e+18	2.21485	-9.58831
1.01917e+18	2.17988	-9.69187
1.01917e+18	2.3905	-9.80492
1.01917e+18	2.03128	-9.65386
1019171907101730201-2	2.36621	-9.61833
1.01917e+18	2.39703	-10.1085
1.01917e+18	0.978999	-9.81916
1019171907101560393-1	2.35985	-9.6249
1.01917e+18	1.42552	-10.1764
1.01917e+18	2.01182	-10.4456
1019171907101560529-1	2.39462	-9.6525
1.01917e+18	-0.344357	-9.96228
1.01917e+18	-0.948179	-10.4842
1.01917e+18	-0.530191	-10.2156
1019171907101550382-3	-0.742764	-10.527
1.01917e+18	-1.03234	-10.7347
1019171907101720603-1	-1.1657	-10.6085
1.01917e+18	-0.749115	-10.4497
1.01917e+18	-1.10105	-10.5834
1.01917e+18	-0.682756	-10.4336
1019171907101550540-2	8.33094	9.20764
1019171907101550182-2	3.72168	10.8748
1019171907101550694-1	4.81197	10.3586
1019171907101720109-1	3.7956	11.1707
1.01917e+18	3.22968	11.1099
1019171907101720629-1	-14.0746	-10.9762
1.01917e+18	0.592559	-9.59736
1019171907101720557-1	0.376601	-9.49284
1019171907101720539-1	4.08275	4.47637
1.01917e+18	0.975313	-9.86952
1019171907101550303-2	1.2782	-10.1762
1.01917e+18	0.752386	-9.85677
1.01917e+18	0.847206	-9.86505
1.01917e+18	0.632396	-9.53061
1019171907101550302-2	0.919252	-10.0026
1019171907101720477-2	0.984045	-9.80585
1019171907101550276-1	0.942102	-9.76466
1019171907101730548-2	1.75073	-10.8895
1.01917e+18	1.72561	-11.0199
1019171907101730566-1	1.79706	-11.0142
1.01917e+18	-0.606812	-10.3498
1019171907101560588-1	-1.13817	-6.90178
1.01917e+18	-12.8231	-10.6883
1.01917e+18	-13.6508	-10.9044
1.01917e+18	-12.8248	-10.7865
1.01917e+18	-13.6726	-10.9188
1019171907101890039-1	-1.35604	-7.9245
1019171907101550794-1	-1.39576	-7.90781
1019171907101730569-2	-1.5595	-7.59627
1.01917e+18	-1.33623	-7.54695
1.01917e+18	-0.459314	-10.1746
1.01917e+18	-0.479834	-10.1772
1.01917e+18	-0.345418	-10.033
1.01917e+18	-0.41636	-10.1104
1.01917e+18	-0.191528	-6.55216
1.01917e+18	-0.234493	-6.57663
1.01917e+18	-0.273387	-6.79025
1.01917e+18	-0.960414	-7.81628
1.01917e+18	-0.218186	-6.07568
1019171907101730622-2	-1.51675	-7.75454
1.01917e+18	-1.62442	-7.68197
1019171907101720509-1	-1.5992	-7.73064
1019171907101550438-1	10.2294	1.72624
1019171907101550227-3	10.1175	8.60799
1019171907101720098-1	10.2046	1.78315
1.01917e+18	10.3306	9.25132
1.01917e+18	10.5336	1.59531
1019171907101550272-2	6.30218	7.4371
1019171907101720374-2	7.81284	8.9941
1019171907101710087-3	10.2219	1.69241
1.01917e+18	7.69642	8.62858
1.01917e+18	8.28408	8.58513
1019171907101720131-1	11.2545	1.2243
1.01917e+18	6.37869	8.32342
1.01917e+18	11.5134	4.73803
1019171907101550364-2	8.686	8.25093
1019171907101720243-2	11.2863	1.27512
1019171907101720237-2	10.1465	7.3052
1019171907101720369-1	8.04458	-6.05595
1.01917e+18	8.38426	-7.08194
1.01917e+18	8.35454	-6.86917
1019171907101550479-1	8.03597	-6.01387
1019171907101550750-1	8.46355	-7.11199
1019171907101550076-2	8.09524	-6.12391
1019171907101720462-1	10.3602	-0.123223
1019171907101720501-1	10.366	-0.0219517
1019171907101550132-1	7.90319	-5.66974
1019171907101550138-3	8.02772	-6.04829
1019171907101550114-3	8.45228	-6.74344
1.01917e+18	5.30676	7.16238
1019171907101550082-2	8.40207	-6.96771
1019171907101550271-2	8.0915	-6.10718
1.01917e+18	8.25846	-6.47324
1019171907101550789-1	3.84734	8.43333
1019171907101550469-1	7.92075	-5.76279
1019171907101550242-1	8.11968	-6.19209
1019171907101720626-1	-0.670844	-6.06656
1.01917e+18	-0.991209	-6.44947
1.01917e+18	-0.0273715	-5.49784
1.01917e+18	-0.190662	-5.62124
1019171907101550870-1	-0.0428522	-5.43927
1019171907101550161-2	-0.0528851	-5.43934
1.01917e+18	-0.0584797	-5.58569
1019171907101550847-1	-0.412801	-5.76291
1019171907101710305-1	-0.553588	-5.87879
1.01917e+18	-0.0807692	-5.58937
1019171907101560639-1	0.0269135	-5.40949
1.01917e+18	-0.0973639	-5.68818
1.01917e+18	-0.0055539	-5.46444
1019171907101550255-2	0.0478184	-5.41554
1.01917e+18	-0.0163204	-5.49021
1.01917e+18	-0.294738	-5.63633
1.01917e+18	-0.278294	-5.96504
1019171907101720050-1	-0.346257	-6.01195
1019171907101720599-1	-0.38029	-6.08313
1019171907101730299-1	-0.363615	-6.20563
1.01917e+18	0.515942	-8.10293
1.01917e+18	0.53784	-8.25067
1019171907101560530-2	0.592648	-8.53342
1019171907101560373-2	0.677264	-8.82344
1019171907101720200-2	0.603868	-8.38862
1019171907101560458-1	3.28367	4.21268
1.01917e+18	3.15511	4.15671
1019171907101730230-2	0.594678	-8.40866
1019171907101550370-1	-0.439189	-6.09634
1019171907101730337-2	-1.375	-7.30301
1019171907101730506-1	-1.63986	-7.6832
1019171907101730481-1	-1.50669	-7.6651
1019171907101730281-1	2.42787	-10.3442
1019171907101720530-1	2.47617	-10.3805
1019171907101720577-1	1.70558	-11.0312
1019171907101730517-2	2.13877	-10.8674
1019171907101550345-2	2.40157	-9.84453
1019171907101730490-1	2.13517	-10.7552
1019171907101730485-2	2.42622	-10.9173
1019171907101720455-1	2.51083	-10.7288
1.01917e+18	2.42755	-9.81447
1019171907101730353-1	2.47609	-10.5897
1019171907101720559-1	1.74693	-11.0921
1019171907101720592-1	2.42212	-10.8556
1019171907101550394-2	1.67913	-10.36
1019171907101730422-1	1.36669	-10.4167
1019171907101710124-2	2.31381	-10.4437
1019171907101560350-2	2.45149	-10.5309
1019171907101730430-1	2.28634	-10.9412
1019171907101550420-1	1.12557	-9.98033
1.01917e+18	1.40748	-10.629
1019171907101720529-1	2.34861	-10.4301
1019171907101720179-1	2.45248	-10.3066
1.01917e+18	1.94393	-11.0022
1.01917e+18	1.7768	-11.0462
1.01917e+18	1.76705	-11.0615
1.01917e+18	1.87748	-11.0723
1.01917e+18	1.73115	-10.9111
1019171907101730407-2	2.35889	-10.7901
1019171907101730374-2	1.96036	-10.9948
1019171907101720561-1	1.97002	-10.9485
1.01917e+18	1.94162	-10.7126
1.01917e+18	1.75491	-10.6291
1019171907101560368-3	2.48251	-10.7048
1019171907101550253-2	2.41129	-10.8603
1.01917e+18	2.14637	-10.8805
1.01917e+18	2.04912	-10.7855
1.01917e+18	1.77806	-10.5379
1019171907101560303-3	0.876049	-9.67938
1.01917e+18	1.51993	-10.3948
1019171907101720587-1	1.55459	-10.7215
1019171907101720580-1	1.41386	-10.0642
1.01917e+18	1.00667	-9.73932
1.01917e+18	0.987238	-9.84374
1.01917e+18	0.923051	-9.76687
1.01917e+18	0.743346	-9.77244
1.01917e+18	1.14637	-9.73309
1.01917e+18	0.969253	-9.86092
1.01917e+18	1.09105	-9.957
1.01917e+18	0.387701	-9.67271
1019171907101550220-3	0.83086	-9.8709
1.01917e+18	1.04599	-9.85804
1.01917e+18	1.61558	-10.6148
1019171907101560363-3	1.23267	-10.0127
1019171907101550071-3	-0.434964	-6.08097
1019171907101550077-3	-0.456595	-6.17283
1019171907101560437-2	1.89807	-9.63173
1019171907101730400-1	0.180894	-9.48293
1019171907101720560-1	0.622184	-8.87481
1019171907101550518-1	0.560995	-8.73813
1019171907101730296-2	0.254879	-7.81084
1019171907101560539-1	0.555199	-8.62688
1.01917e+18	2.9705	-1.49139
1019171907101710151-2	2.87236	-1.39164
1.01917e+18	2.89225	-1.40834
1019171907101720419-2	3.04691	-1.48059
1019171907101550464-1	3.23764	-1.65533
1019171907101720127-1	0.821602	5.64253
1019171907101720129-1	10.0948	0.0856872
1019171907101550788-1	0.750628	5.88852
1.01917e+18	1.3504	4.44749
1.01917e+18	3.07238	4.59254
1.01917e+18	1.55372	4.23047
1019171907101550753-1	0.6288	5.97516
1019171907101720492-1	10.2004	-0.283648
1.01917e+18	0.9944	5.57803
1.01917e+18	10.5227	0.722622
1019171907101730448-1	1.7025	3.99469
1019171907101550592-2	10.2113	-0.296476
1.01917e+18	1.45233	4.35531
1019171907101730141-2	1.35803	4.52925
1019171907101720114-2	1.44497	4.25694
1019171907101720173-2	1.29454	4.48216
1019171907101550260-3	9.19203	1.63467
1.01917e+18	8.53547	1.1799
1019171907101720452-1	4.07598	-2.29614
1019171907201550169-1	8.22775	0.761017
1019171907101550689-1	8.27353	0.844533
1.01917e+18	6.58824	-0.75451
1019171907101720269-1	6.82498	-0.389795
1019171907101710204-1	4.08472	-2.03082
1019171907101720266-2	3.29304	-1.71349
1019171907101720473-1	4.01798	-2.56395
1019171907101550621-2	7.21938	-0.0411707
1019171907101720251-1	3.73674	-2.21861
1019171907101550196-1	3.42128	-1.80278
1019171907101550429-1	8.21592	0.880926
1019171907101550577-1	4.80462	-2.73502
1019171907101710137-1	2.93023	-1.41617
1019171907101720378-2	8.60311	1.13358
1019171907101540284-1	8.07962	0.679278
1019171907101550311-3	6.67712	-0.573906
1019171907101550444-2	4.85779	-2.60523
1019171907101550477-1	7.05297	-0.174923
1019171907101550195-2	8.36226	0.991852
1019171907101550319-2	7.84148	0.423586
1019171907101720184-2	4.96251	-2.50743
1019171907101550486-2	6.23803	-1.20259
1019171907101720457-2	10.372	-0.215516
1.01917e+18	5.42788	-2.17896
1019171907101540253-1	5.94232	-1.70126
1.01917e+18	4.20006	-2.70683
1019171907101550190-1	3.58594	-1.95495
1019171907101720189-2	7.31139	0.0317083
1019171907101550297-2	8.19789	0.742339
1019171907101720343-2	6.83744	-0.358903
1019171907101550538-2	6.03596	-1.76742
1019171907101550334-3	6.78156	-0.449395
1019171907101710073-2	6.47538	-1.03916
1019171907101550173-1	8.77307	0.945403
1019171907101720125-1	6.7785	-0.468646
1019171907101550256-2	8.31309	0.921822
1.01917e+18	5.28234	-2.1699
1019171907101550465-2	4.89166	-2.57944
1019171907101550431-1	6.89425	-0.282555
1019171907101550474-1	6.44578	-0.923308
1019171907101550478-2	3.63937	-2.07961
1019171907101720442-2	4.52796	-2.73063
1019171907101550640-1	5.5709	-2.15385
1019171907101720490-1	10.0151	1.31523
1019171907101720110-1	9.10069	1.70398
1019171907101720270-2	3.83369	-2.26804
1019171907101720103-1	6.40789	-1.58025
1019171907101550565-1	4.16521	-2.37184
1019171907101550318-3	8.55547	1.25923
1019171907101720089-1	5.12773	-2.44145
1019171907101550481-1	6.77549	-0.949239
1019171907101720329-2	5.02098	-2.50629
1019171907101550629-1	10.0824	1.88486
1019171907101550566-1	6.2779	-1.62721
1019171907101720207-1	8.65304	1.31708
1019171907101720206-2	9.07351	1.69231
1019171907101550290-3	6.77066	-0.481008
1019171907101550595-2	4.20737	-2.69748
1019171907101550471-1	5.12311	-2.44206
1019171907101550570-2	4.26918	-2.68101
1019171907101720372-1	6.9999	-0.279129
1019171907101720177-1	5.98291	-1.84033
1019171907101550556-2	6.76735	-1.121
1019171907101720219-1	4.86514	-2.3858
1019171907101550451-1	5.78298	-1.97458
1019171907101550110-2	3.91678	-2.08614
1019171907101550618-2	6.36768	-1.37375
1019171907101720292-1	4.37168	-2.31282
1.01917e+18	4.65651	-2.74385
1019171907101720123-2	5.69381	-2.04396
1019171907101720120-1	8.37931	1.01517
1019171907101550327-2	4.1406	-2.60254
1019171907101550802-1	8.97496	1.63362
1.01917e+18	3.08246	-1.53356
1019171907101550347-3	4.01936	-2.51617
1.01917e+18	4.30936	-2.83817
1019171907101720398-1	5.05501	-2.47413
1019171907101550277-1	4.62341	-2.35677
1019171907101550512-1	5.87887	-1.93218
1.01917e+18	6.79286	-1.54888
1.01917e+18	4.67098	-2.7384
1019171907101550795-1	9.86158	1.79825
1019171907101550159-2	3.75541	-2.15928
1019171907101550782-1	4.34259	-2.75778
1019171907101550332-3	7.81809	0.360952
1.01917e+18	2.89947	-1.39782
1.01917e+18	3.6557	-2.0559
1019171907101550405-2	6.30428	-1.4398
1019171907101710101-2	3.7977	-1.92083
1019171907101710091-3	3.83463	-2.17343
1019171907101540259-1	8.13967	0.705658
1.01917e+18	7.96762	0.330459
1.01917e+18	3.20104	-1.57251
1019171907101550838-1	6.30818	-1.27848
1019171907101550453-2	6.21357	-1.57245
1.01917e+18	6.33334	-1.11428
1019171907101550428-2	7.78223	0.416202
1019171907101550162-2	7.08435	-0.144407
1019171907101550785-1	4.27934	-2.80174
1019171907101550452-1	4.00219	-2.52545
1019171907101540049-1	3.07368	-1.52984
1019171907101720247-2	6.94427	-0.798984
1019171907101710153-1	3.11929	-1.56329
1.01917e+18	4.78039	-2.78614
1019171907101550404-2	3.87198	-2.14653
1019171907101550395-2	7.67092	0.308603
1019171907101550417-2	8.26631	0.896576
1019171907101550403-3	4.05371	-2.7217
1019171907101550315-3	7.88461	0.472092
1.01917e+18	7.72387	0.323237
1019171907101720226-1	4.34339	-2.7671
1019171907101720453-2	3.23304	-1.64324
1.01917e+18	5.1046	-2.49205
1.01917e+18	-0.278655	-8.9996
1019171907101560653-1	-3.11102	-8.3094
1.01917e+18	-3.14868	-8.34928
1.01917e+18	-1.54238	-7.69527
1.01917e+18	11.0196	1.04278
1019171907101540152-1	6.11342	7.54323
1.01917e+18	7.40699	-0.308673
1019171907101710048-3	5.78797	-1.96067
1019171907101710050-3	11.7986	4.19423
1019171907101710047-2	10.2276	1.73242
1.01917e+18	6.85462	9.1203
1.01917e+18	11.0183	1.11256
1019171907101550484-2	8.80898	9.22217
1019171907101710077-3	11.6747	4.20828
1.01917e+18	10.2479	7.15384
1.01917e+18	9.89614	7.91359
1019171907101540235-1	10.4237	6.47605
1019171907101550378-3	7.4832	9.0092
1019171907101710071-2	8.40296	8.23092
1019171907101540254-1	10.0874	9.23677
1019171907101550437-2	9.66138	8.34658
1019171907101720323-1	9.25087	7.95365
1019171907101710040-2	11.214	1.38153
1019171907101550362-3	9.93476	7.13308
1019171907101710038-1	10.3674	6.47952
1.01917e+18	10.2475	6.31733
1019171907101550354-1	8.65388	8.51721
1.01917e+18	6.19006	7.36198
1.01917e+18	7.77401	7.99785
1019171907101550635-1	11.1176	5.3035
1019171907101550282-3	9.97229	7.69816
1.01917e+18	6.42613	7.36863
1019171907101710085-2	10.2217	8.80533
1019171907101710045-2	11.2162	1.21181
1.01917e+18	8.03663	0.623096
1019171907101550470-2	10.3171	6.47002
1019171907101550456-1	9.92676	7.14814
1019171907101550399-3	8.15601	-6.26482
1.01917e+18	7.73346	8.41739
1019171907101550700-1	9.71244	7.32272
1.01917e+18	7.93256	8.84308
1019171907101710117-1	10.3363	8.85257
1.01917e+18	7.0155	8.33869
1.01917e+18	10.826	1.01481
1019171907101720079-2	10.0295	7.13417
1019171907101710057-2	8.84063	1.40157
1019171907101540143-1	10.2708	7.18952
1.01917e+18	10.2181	0.491985
1019171907101720209-1	9.79658	1.10081
1019171907101550361-2	10.0581	8.56945
1019171907101720322-1	5.27106	-2.34306
1019171907101550714-1	9.02729	7.63448
1019171907101710062-3	8.87822	1.55244
1019171907101550647-1	10.2747	9.53225
1019171907101550748-1	6.42869	7.71114
1.01917e+18	9.22767	7.83806
1019171907101550397-1	8.37292	1.043
1019171907101540150-1	10.4599	9.21221
1.01917e+18	6.17879	7.75002
1019171907101550651-1	10.0175	7.52964
1019171907101710016-1	10.3478	7.3663
1019171907101550396-2	11.6773	3.59156
1019171907101710039-2	11.3469	5.09493
1019171907101550472-1	9.52934	7.31917
1019171907101550757-1	9.19786	8.63581
1019171907101720190-2	11.2853	5.1561
1.01917e+18	10.0102	8.87358
1.01917e+18	10.354	9.0493
1.01917e+18	11.6282	3.45629
1.01917e+18	10.4177	1.61526
1019171907101710052-2	11.2865	5.09592
1019171907101710051-1	9.6447	1.84214
1.01917e+18	6.91318	-0.301516
1019171907101550468-1	8.99877	1.6628
1019171907101550269-3	6.41102	-0.972769
1.01917e+18	9.80363	1.85064
1.01917e+18	8.8028	8.29426
1.01917e+18	7.07345	8.5694
1.01917e+18	11.6384	3.48324
1019171907101550316-1	9.47132	8.47861
1019171907101550587-1	11.3288	5.08938
1.01917e+18	5.47712	7.05163
1.01917e+18	9.39279	1.7854
1019171907101550330-2	10.137	7.69851
1019171907101540291-1	11.6827	3.5256
1019171907101550322-2	10.0799	8.50607
1019171907101550285-3	11.3056	4.96964
1.01917e+18	6.60335	8.41908
1019171907101550632-1	7.62831	9.02141
1019171907101550702-1	8.66866	8.3362
1019171907101550442-2	8.81234	1.47775
1.01917e+18	10.5396	1.62743
1.01917e+18	10.2523	9.55056
1019171907101550738-1	6.69253	8.29899
1.01917e+18	10.4698	8.91648
1.01917e+18	10.1132	9.43677
1019171907101550473-2	10.3819	6.41538
1019171907101550480-1	11.812	4.25423
1.01917e+18	10.1374	9.36032
1019171907101720169-2	10.3466	9.14447
1019171907101550309-3	8.40353	8.51036
1019171907101720227-1	8.98022	-1.12902
1019171907101540305-1	11.3696	5.19495
1019171907101540293-1	10.2104	9.01895
1019171907101550545-2	8.05869	8.0642
1019171907101550325-3	11.6485	4.28523
1019171907101550321-3	6.51113	7.37393
1019171907101550331-3	8.08005	0.458867
1019171907101720365-2	7.04517	9.13
1019171907101550355-3	9.62485	9.18788
1019171907101720159-2	11.2663	1.22025
1019171907101550650-1	10.1349	7.80586
1019171907101550434-1	9.99392	7.52115
1019171907101710037-2	11.4144	5.10492
1019171907101720328-1	8.38827	8.39943
1019171907101710102-1	9.88981	8.4054
1019171907101720235-1	9.90011	7.44131
1019171907101550655-1	9.42626	9.04515
1019171907101720074-2	11.7245	3.55336
1.01917e+18	10.835	1.56435
1019171907101550560-2	8.48953	8.80403
1.01917e+18	8.62899	-1.1906
1.01917e+18	7.54481	7.96749
1019171907101720045-1	8.91204	8.45148
1019171907101550535-2	11.8028	3.85931
1019171907101720454-1	10.2301	1.54358
1019171907101720174-2	9.19146	8.97453
1.01917e+18	11.3211	5.13255
1019171907101720204-1	11.6251	3.557
1.01917e+18	11.2138	1.26856
1019171907101550581-2	8.07469	9.20854
1019171907101550305-3	10.3577	6.38727
1019171907101550475-2	10.3269	7.30055
1.01917e+18	7.94487	8.43405
1019171907101550754-1	8.53736	9.18622
1019171907101550149-2	10.3269	7.31536
1019171907101550145-3	5.7666	7.67435
1019171907101550798-1	10.3703	9.21733
1019171907101720191-2	6.33262	-1.39123
1019171907101550094-2	10.2473	8.68265
1.01917e+18	11.3826	5.06402
1019171907101710104-1	10.3874	6.42084
1.01917e+18	9.68455	7.43449
1019171907101720236-1	10.1893	7.20517
1019171907101720450-1	8.70534	8.264
1.01917e+18	7.85989	8.24348
1019171907101550342-2	10.4232	6.33618
1019171907101550398-2	9.07703	9.19324
1019171907101550301-2	4.83648	-2.70989
1019171907201550504-1	11.2776	1.27211
1.01917e+18	5.00036	8.50766
1019171907101550681-1	8.82842	8.38123
1.01917e+18	9.82566	8.4441
1019171907101550583-2	9.76181	7.20306
1019171907101720309-1	9.98617	7.67755
1019171907101550349-1	9.90307	7.10819
1019171907101710099-2	11.7813	4.26856
1019171907101720244-2	11.1482	5.21009
1019171907101720310-1	10.0351	6.74923
1019171907101550778-1	9.43104	8.9495
1.01917e+18	10.0716	1.73389
1019171907101550772-1	6.61743	7.98867
1019171907101550614-1	7.71785	8.69153
1019171907101550544-2	10.2247	1.85449
1019171907101550611-1	9.09312	1.61509
1019171907101550797-1	10.3904	9.0654
1019171907101720233-1	6.98692	8.16843
1.01917e+18	10.0616	8.6883
1.01917e+18	11.7351	3.67965
1.01917e+18	7.43009	8.23293
1019171907101550574-2	10.4962	6.2205
1019171907101720469-1	10.137	8.75659
1019171907101550670-1	8.25198	9.16095
1.01917e+18	7.28923	7.93878
1019171907101550343-3	7.85261	-1.27398
1019171907101720495-1	8.68693	8.35122
1019171907101550622-2	11.3101	1.31983
1.01917e+18	4.2776	8.64891
1019171907101720281-2	11.2611	1.2651
1019171907101550263-3	9.3398	8.62159
1019171907101550803-1	10.1463	8.96765
1019171907101550585-2	8.76267	8.55097
1019171907101550531-2	8.7868	8.16549
1019171907101720056-1	9.89837	1.89703
1019171907101550296-3	9.4881	1.83416
1019171907101550426-1	9.00244	7.97123
1.01917e+18	9.35251	7.57536
1019171907101720164-2	11.019	1.45037
1019171907101550423-1	6.15829	-1.19902
1019171907101550806-1	10.2926	9.47753
1019171907101550553-2	9.27194	9.22789
1019171907101720238-1	8.64658	-1.07746
1019171907101550551-2	9.95587	8.8084
1019171907101550427-2	6.54401	8.37692
1019171907101550617-2	10.4081	6.37834
1.01917e+18	9.8008	1.85934
1019171907101550341-2	11.0519	1.4387
1.01917e+18	8.37514	9.28961
1.01917e+18	10.043	7.25811
1019171907101550625-2	6.86343	8.14298
1019171907101550776-1	9.59338	8.88533
1019171907101550804-1	11.6517	4.31772
1019171907101550421-2	10.7002	1.55487
1019171907101720223-1	11.6757	4.11518
1019171907101550529-2	11.6269	3.37333
1019171907101550333-3	10.1985	7.28736
1019171907101720600-1	1.65922	5.15669
1019171907101720095-2	1.33494	5.97672
1019171907101730216-2	1.84153	5.10355
1019171907101560572-1	1.73463	5.23956
1019171907101720582-1	1.90304	5.02756
1.01917e+18	1.41769	5.83464
1.01917e+18	1.09882	7.34374
1019171907101730229-2	1.28008	6.59789
1019171907101560566-1	1.0137	7.19563
1019171907101550850-1	4.98908	7.17707
1019171907101730202-2	1.74285	5.11237
1019171907101550837-1	0.936418	7.04934
1019171907101720536-1	1.55066	6.16171
1019171907101550831-1	1.72449	5.238
1019171907101730185-2	1.84034	5.10688
1.01917e+18	1.56589	6.23
1019171907101720088-2	0.747729	7.72055
1.01917e+18	1.21684	6.20813
1019171907101550842-1	1.15634	6.43155
1019171907101730252-2	1.72186	5.3461
1019171907101720121-2	1.37297	5.88205
1019171907101560547-1	1.09487	6.61389
1.01917e+18	1.77975	5.18014
1.01917e+18	3.11024	4.47415
1019171907101550865-1	0.769438	7.54048
1019171907101550875-1	1.03274	6.70101
1019171907101560571-1	1.24605	5.95188
1019171907101550859-1	1.84743	5.28776
1.01917e+18	1.66026	5.24316
1019171907101550116-2	1.03756	7.76402
1.01917e+18	1.06413	7.73546
1.01917e+18	1.15619	6.20805
1019171907101560509-1	1.77093	5.19369
1019171907101710167-1	7.84172	-5.59777
1019171907101550152-1	1.8424	5.24344
1019171907101550103-2	1.77725	5.12241
1.01917e+18	1.36004	6.05888
1019171907101550109-3	2.98604	4.65706
1019171907101560416-2	1.18224	6.57712
1019171907101560499-1	3.0441	4.54373
1019171907101720171-2	0.869292	7.13679
1019171907101730317-1	2.45121	4.62408
1019171907101550128-3	1.57689	5.46064
1019171907101720188-2	0.699478	7.39779
1.01917e+18	8.13513	-6.27463
1019171907101550209-1	8.04397	-6.0261
1019171907101720552-1	8.27324	-6.9393
1.01917e+18	8.37871	-7.07718
1.01917e+18	8.45544	-6.9142
1019171907101720256-2	8.36229	-6.88595
1019171907101720575-1	7.96841	-5.90143
1.01917e+18	8.20569	-6.36766
1019171907101550170-1	8.42399	-6.78042
1.01917e+18	8.40117	-7.0497
1.01917e+18	8.05088	-6.09224
1019171907101550704-1	8.37014	-7.00611
1019171907101710163-2	8.3852	-6.76197
1019171907101550099-2	8.50234	-6.74099
1.01917e+18	8.34898	-6.98201
1019171907101550860-1	7.83263	-5.58912
1019171907101550092-3	7.87254	-5.62914
1.01917e+18	8.38401	-7.05105
1.01917e+18	7.83785	-5.57631
1019171907101550835-1	8.35476	-6.9887
1.01917e+18	7.86239	-5.54254
1019171907101550169-2	8.43735	-6.83383
1019171907101720386-1	8.33534	-6.67569
1019171907101550818-1	4.95009	7.3012
1019171907101550862-1	8.00741	-5.88857
1019171907101550855-1	8.4307	-7.01855
1019171907101550177-2	7.90904	-5.68729
1019171907101550233-2	8.09504	-6.1708
1019171907101550589-1	8.37619	-6.65691
1019171907101550873-1	1.22695	4.64315
1019171907101730191-2	1.39861	4.38277
1019171907101560601-1	1.26306	4.7332
1019171907101720053-1	1.62514	4.17719
1.01917e+18	8.21664	-1.25942
1.01917e+18	10.6533	0.938738
1019171907101550892-1	-3.01254	-8.19492
1019171907101550500-2	10.3894	-0.550924
1019171907101550530-2	10.306	1.56952
1019171907101550517-2	10.3828	-0.517288
1019171907101720156-1	10.5864	0.961769
1019171907101720150-1	9.32823	0.797161
1.01917e+18	9.53525	-0.756544
1019171907101550507-1	7.90952	-1.30485
1019171907101550243-3	10.2274	1.25328
1019171907101550483-2	7.29547	-1.49574
1019171907101720248-1	8.92503	-1.00547
1019171907101720324-1	6.92786	-1.61553
1019171907101550626-1	9.19425	-0.89694
1019171907101720475-1	9.77018	-0.663356
1019171907101720382-1	7.33612	-1.50421
1019171907101550563-2	8.37486	-1.21183
1019171907101550410-1	7.68258	0.176213
1019171907101550659-1	9.77573	0.82032
1019171907101550457-1	8.86033	-1.14335
1019171907101720302-2	9.56718	-0.732985
1019171907101720409-2	9.14567	-0.975299
1019171907101550573-2	10.2989	1.59853
1019171907101550291-3	10.3807	-0.386224
1019171907101550569-1	9.25097	-0.939786
1.01917e+18	10.0928	1.48087
1019171907101720414-2	10.4166	-0.447897
1019171907101720422-2	10.2927	1.12532
1.01917e+18	10.3266	0.0453541
1019171907101550458-1	9.01922	-1.04132
1019171907101720460-1	8.88696	-1.14403
1019171907101720451-1	9.6052	-0.795491
1019171907101550502-1	8.8147	-0.968346
1019171907101550511-1	8.5733	-1.04513
1.01917e+18	9.56027	1.67688
1.01917e+18	10.303	-0.485471
1019171907101720470-2	9.62944	-0.761082
1.01917e+18	7.3715	-1.38803
1019171907101550508-1	8.8414	-0.616623
1019171907101720446-1	10.1174	-0.34623
1019171907101720482-1	10.3647	-0.527005
1019171907101720405-2	7.39423	-1.43308
1019171907101720399-2	9.62349	-0.782189
1019171907101550586-1	7.22807	-1.47739
1019171907101550447-2	8.68312	-1.20094
1019171907101720426-1	9.62579	-0.761236
1019171907101720413-2	9.81843	-0.656432
1019171907101720531-1	10.4457	-0.523257
1.01917e+18	10.372	0.641597
1.01917e+18	8.87584	1.06166
1019171907101550591-2	9.6473	-0.745924
1019171907101550424-2	8.77911	0.880487
1019171907101720087-1	9.98441	1.76455
1019171907101720117-1	7.38193	-0.0465933
1019171907101550584-1	10.1619	1.67229
1019171907101720424-1	9.90875	1.46622
1.01917e+18	7.46391	-1.34911
1019171907101550668-1	7.27957	-1.21496
1019171907101550509-2	9.82907	-0.68112
1019171907101720304-1	9.45274	-0.811373
1019171907101550392-1	7.1992	-1.57274
1.01917e+18	10.3498	-0.595403
1.01917e+18	8.39863	-1.18625
1019171907101720213-1	9.10163	-1.00645
1019171907101720466-2	9.82676	-0.712813
1019171907101720178-1	9.00295	-1.11014
1019171907101550664-1	8.46746	-1.16607
1019171907101550503-1	10.3102	-0.156392
1019171907101720425-1	8.88884	-1.15487
1019171907101720195-1	9.95198	1.09037
1.01917e+18	8.20328	0.765161
1.01917e+18	10.1069	0.218193
1019171907101550636-1	8.44826	-1.13544
1019171907101550413-2	10.0084	-0.61124
1.01917e+18	3.9567	-2.36912
1019171907101720104-1	6.15254	-1.61609
1019171907101710031-1	9.89894	1.93297
1.01917e+18	5.71431	-2.04444
1019171907201550311-1	6.34648	-1.26252
1019171907101550359-1	7.16891	-0.0950186
1.01917e+18	9.07684	1.69691
1.01917e+18	6.26423	-1.16282
1019171907101550391-3	8.87127	1.49822
1019171907101710095-3	6.93634	-0.283359
1019171907101550258-2	3.30489	-1.71892
1019171907101550385-2	4.80993	-2.71251
1.01917e+18	9.28687	1.68559
1019171907101550329-2	5.10162	-2.30061
1019171907101550402-2	8.26327	0.857931
1019171907101540041-1	3.13013	-1.57565
1019171907101550791-1	4.7781	-1.82887
1019171907101550440-2	8.0475	0.637899
1019171907101720312-1	4.97799	-2.56881
1019171907101720319-1	3.1785	-1.62734
1019171907101550259-2	6.90985	-0.310524
1019171907101550313-3	8.40034	1.04133
1019171907101720274-1	6.48384	-0.851326
1019171907101720291-2	4.12668	-2.63904
1019171907101720155-2	5.8754	-1.96364
1019171907101720280-1	3.92096	-2.26492
1019171907101550455-1	6.219	-1.41697
1019171907101720153-2	4.60239	-2.74736
1.01917e+18	9.24201	1.83867
1.01917e+18	3.12173	-1.51143
1.01917e+18	-3.01305	-8.17558
1.01917e+18	-13.4601	-10.7502
1.01917e+18	-3.14589	-8.40268
1019171907101560651-1	-3.07295	-8.35568
1019171907101560665-1	-3.07444	-9.01507
1019171907101730108-1	-3.09442	-8.34219
1019171907101710243-1	-0.255148	-7.06501
1.01917e+18	-0.736474	-8.83173
1019171907101890025-1	-0.748331	-8.78473
1019171907101720463-1	5.02753	5.41014
1019171907101720483-1	5.18418	5.49569
1019171907101720458-2	5.46741	5.91056
1.01917e+18	4.906	5.22336
1019171907101550344-2	5.85819	6.61722
1019171907101550283-3	4.7133	5.23966
1019171907101550275-2	4.50002	4.73527
1019171907101550335-2	5.42125	5.81072
1019171907101720502-1	4.36073	4.57874
1019171907101550389-3	5.02921	5.34486
1019171907101720540-1	4.49205	4.74646
1019171907101720533-1	4.395	4.55241
1019171907101550160-2	5.54817	6.02137
1019171907101550352-2	4.20081	4.47097
1019171907101550287-3	4.82112	5.16483
1019171907101720532-1	4.63296	4.9281
1019171907101720562-1	4.78215	5.04589
1019171907101550158-2	5.87371	6.40578
1.01917e+18	5.32557	5.66679
1019171907101550400-3	5.24984	5.57073
1019171907101720334-2	5.95728	6.85621
1019171907101550590-1	5.32008	5.64072
1.01917e+18	5.35014	5.70605
1019171907101550415-1	5.21677	5.54672
1019171907101720590-1	4.48451	4.55951
1.01917e+18	4.42508	4.59242
1019171907101550314-2	5.68519	6.72183
1019171907101720496-2	5.66776	7.04111
1019171907101720527-1	6.35192	7.07403
1019171907101720485-1	4.46333	4.53095
1019171907101720381-1	4.80084	5.30719
1019171907101710141-1	4.35986	4.53431
1019171907101550411-2	10.3717	-0.0984791
1019171907101720528-1	4.45227	4.56893
1019171907101720436-2	5.16394	5.4911
1019171907101720565-1	4.3145	4.6432
1019171907101550439-1	5.7354	6.24666
1.01917e+18	4.3318	4.65628
1019171907101550147-3	6.25245	6.93436
1019171907101550720-1	5.81749	6.69325
1.01917e+18	5.24861	5.5947
1019171907101550373-3	6.18697	6.81502
1.01917e+18	-13.3772	-10.7032
1019171907101720203-1	-0.605164	-10.3581
1.01917e+18	-1.23314	-10.6619
1.01917e+18	1.35926	5.55567
1.01917e+18	-0.771479	-10.521
1019171907101710241-2	-0.763901	-10.5128
1.01917e+18	-1.24372	-10.5929
1.01917e+18	-1.11255	-10.6554
1.01917e+18	-1.18403	-10.6514
1.01917e+18	-1.05974	-10.7055
1.01917e+18	-0.722388	-10.4928
1.01917e+18	-1.09374	-10.5366
1019171907101550192-2	-0.956125	-10.6725
1.01917e+18	-0.837707	-10.6234
1019171907101720307-2	0.660339	-8.36285
1019171907101550095-2	-1.27883	-10.6132
1.01917e+18	-0.912625	-10.6849
1019171907101550085-3	-1.19891	-10.6023
1019171907101730386-1	-0.826555	-10.5938
1.01917e+18	-0.80049	-10.5462
1.01917e+18	-1.05338	-6.92332
1.01917e+18	-1.06761	-7.08534
1.01917e+18	-1.04151	-7.00395
1.01917e+18	-1.01608	-7.02501
1.01917e+18	0.452036	-9.37708
1019171907101550178-2	-10.0062	2.70465
1019171907101550848-1	-10.5424	2.78916
1.01917e+18	-10.1118	2.70751
1.01917e+18	-10.7755	2.72503
1019171907101550727-1	-9.61327	2.66381
1019171907101550142-2	-9.5198	2.73938
1.01917e+18	-10.4167	2.72869
1019171907101730318-1	-10.7125	2.8173
1019171907101710025-1	-9.94545	2.55761
1019171907101720208-2	-9.71033	2.53792
1019171907101730389-1	-9.83676	2.61066
1.01917e+18	-10.7868	2.78153
1.01917e+18	-10.5286	2.74243
1.01917e+18	-9.79834	2.49394
1019171907101890053-2	-10.7058	2.78317
1019171907101560317-3	-9.53851	2.74064
1.01917e+18	-10.7165	2.68619
1019171907101720337-1	-9.38049	2.85904
1.01917e+18	-9.85226	2.76868
1019171907101540159-1	-9.8356	2.70228
1019171907101550363-2	-9.1775	3.03161
1.01917e+18	-10.238	2.68047
1.01917e+18	-9.81756	2.48119
1.01917e+18	-10.1305	2.71787
1.01917e+18	-9.70787	2.58738
1019171907101550206-2	-9.62005	2.76346
1.01917e+18	-10.8287	2.71262
1.01917e+18	-10.6243	2.76596
1.01917e+18	-10.0137	2.66136
1019171907101720567-1	-10.0323	2.77006
1019171907101540224-1	-10.0031	2.58287
1.01917e+18	-10.3938	9.24424
1.01917e+18	-10.5303	9.17701
1019171907101540178-1	-10.4385	9.07974
1019171907101540173-1	-10.7668	9.1643
1.01917e+18	-24.3961	12.3944
1019171907101550229-3	-24.3439	12.4464
1.01917e+18	-24.2703	12.5201
1019171907101720548-1	-24.4771	12.3137
1.01917e+18	-24.259	12.5315
1019171907101710181-2	-10.3736	-2.1527
1019171907101540282-1	-24.3212	12.4693
1.01917e+18	-24.384	12.4065
1019171907101890068-2	-24.3803	12.4106
1019171907101720570-1	-24.3709	12.4195
1019171907101550383-1	-24.3533	12.4371
1019171907101550761-1	-10.3328	2.70535
1.01917e+18	-9.86585	2.64909
1019171907101550819-1	-9.75625	2.56612
1.01917e+18	-10.8337	2.78838
1.01917e+18	-9.79906	2.50638
1.01917e+18	-9.67267	2.63932
1019171907101550339-2	-10.8131	2.73689
1.01917e+18	-9.72639	2.60981
1019171907101540262-1	-9.90937	2.59869
1019171907101720199-2	-9.69087	2.59104
1019171907101550111-3	-10.6083	2.75771
1019171907101540220-1	-8.04319	10.0168
1019171907101710164-2	-8.0883	9.99483
1019171907101710216-2	-8.02033	10.0402
1019171907101540165-1	-7.97638	10.0782
1019171907101710107-1	-8.19463	9.97238
1019171907101710184-1	-8.02844	10.0379
1.01917e+18	-7.98962	10.0574
1.01917e+18	-8.0752	9.9739
1019171907101540058-2	-7.99802	10.072
1019171907101710192-1	-8.2716	9.84096
1.01917e+18	-8.23416	9.84093
1019171907101710126-2	-8.23597	9.87129
1.01917e+18	-8.35585	9.81607
1019171907101540054-1	-8.23918	9.87302
1019171907101540112-1	-8.31993	9.80349
1019171907101540081-1	-9.95332	9.30537
1019171907101710150-1	-10.7846	9.12586
1019171907101540216-1	-10.8327	9.03874
1.01917e+18	-11.0341	8.95054
1.01917e+18	-10.3852	9.05754
1.01917e+18	-10.1187	9.13829
1.01917e+18	-10.1201	9.13601
1019171907101540186-1	-9.98297	9.2207
1.01917e+18	-8.31812	9.83303
1019171907101540043-2	-10.8592	9.06661
1.01917e+18	-10.1189	9.23167
1.01917e+18	-10.5581	9.10423
1019171907101710088-3	-10.1175	9.08179
1.01917e+18	-10.6223	9.16487
1019171907101710245-1	-10.0174	9.28326
1.01917e+18	-10.376	9.21273
1019171907101540190-1	-10.8493	9.11945
1019171907101710186-2	-10.9008	8.99201
1.01917e+18	-10.6818	9.23021
1019171907101540124-1	-10.9565	8.91609
1019171907101540093-1	-10.0613	9.22022
1019171907101710253-1	-11.0139	8.8748
1019171907101710064-2	-10.3199	9.10977
1019171907101540065-2	-10.0776	9.18906
1019171907101710203-2	-10.9209	8.95838
1019171907101710032-1	-10.0825	9.17881
1.01917e+18	-10.5678	9.1688
1019171907101710236-1	-10.9025	9.12001
1019171907101540276-1	-10.0877	9.22237
1.01917e+18	-10.7288	9.1183
1019171907101540061-1	-10.8764	9.00692
1019171907101540074-2	-10.5545	9.11518
1019171907101710209-1	-10.9066	9.03042
1019171907101540063-2	-10.109	9.15953
1019171907101540160-1	-10.8424	9.04748
1019171907101710042-1	-8.51617	9.83224
1.01917e+18	-10.076	9.24732
1019171907101710142-2	-10.2725	9.11795
1019171907101710139-1	-10.0842	9.10925
1019171907101710132-2	-10.3843	9.24479
1019171907101710166-2	-24.3883	12.4025
1019171907101730361-1	-9.37249	2.86893
1019171907101720058-2	-24.3104	12.48
1.01917e+18	-24.25	12.5404
1.01917e+18	-24.286	12.5048
1.01917e+18	-24.3038	12.487
[truncated: 7 more rows]

## Sheet: SCN WT_KI Umap Embeddings
	umap_1	umap_2
WT_AAACCAACACTATGGC-1	11.6209	-0.333513
WT_AAACCAACATAAACCT-1	-3.98202	0.702713
WT_AAACCGAAGGCGGGTA-1	4.89919	-10.2436
WT_AAACCGAAGTTTGCGG-1	0.596342	-2.5653
WT_AAACCGCGTACCGTAA-1	0.752634	7.40508
WT_AAACCGCGTCAATGTG-1	-1.7948	1.73956
WT_AAACCGGCAATCGCAC-1	-4.2124	-11.1596
WT_AAACCGGCAGTTTGTG-1	-0.712115	1.32834
WT_AAACGCGCATGTTGCA-1	-4.29706	-11.4046
WT_AAAGCAAGTTGCGTAA-1	12.9442	6.11701
WT_AAAGCGGGTGCTAGAC-1	7.24909	1.58837
WT_AAAGCGGGTTTAGCTC-1	0.332065	-2.27309
WT_AAAGCTTGTCACAGCG-1	0.358846	2.09096
WT_AAAGGAGCACCCACAG-1	0.664095	-2.46309
WT_AAAGGAGCAGCAGGTA-1	-13.3866	-5.377
WT_AAAGGAGCAGTAATAG-1	12.8445	5.82017
WT_AAAGGAGCATTGTGTG-1	10.8039	-0.843975
WT_AAAGGCTCAAACGGGC-1	2.43068	-2.09162
WT_AAAGGTTAGGAGGACT-1	5.76563	-9.31607
WT_AAAGGTTAGGCTAAGA-1	-0.759042	-1.44104
WT_AAATCCGGTTTGTGGA-1	1.42008	5.237
WT_AAATGCCTCACCATTT-1	1.93511	1.24757
WT_AAATGCCTCCGGCTAA-1	4.12591	-8.20223
WT_AAATGGCCATCACAGC-1	-4.43092	-3.09385
WT_AAATGGCCATTGTGAT-1	1.23305	4.15955
WT_AACAAAGGTCAAGTAT-1	4.90566	-9.49182
WT_AACAAGCCATCCCTCA-1	-1.37202	-1.39944
WT_AACAGATAGGACCTCA-1	-2.83498	-2.25838
WT_AACAGATAGTTTGGGT-1	6.64214	2.17507
WT_AACAGCAAGCCATCAG-1	-9.52232	8.44966
WT_AACAGCAAGGAGGTTA-1	-9.64577	8.25199
WT_AACAGCAAGGCGAAAC-1	12.5252	3.61579
WT_AACAGGATCCTAGTCC-1	-0.0875949	6.03111
WT_AACATCATCGTTTCTG-1	7.54108	1.11667
WT_AACCCGCAGTAGCGCC-1	0.600123	-9.76361
WT_AACCGCTCATCGTTCT-1	-4.35189	-10.0228
WT_AACCTCACAGCATGGA-1	-1.12783	2.50976
WT_AACCTCACAGGATGGC-1	-4.57254	-10.2018
WT_AACCTCACATGCTCCC-1	-2.41617	0.173463
WT_AACCTCCTCCAATAGC-1	10.8241	-0.233444
WT_AACCTCCTCGTTTCTG-1	1.26634	9.34626
WT_AACCTCCTCTCAATGA-1	1.1543	8.7871
WT_AACCTTAAGCAGGTGG-1	-13.7309	-3.54842
WT_AACCTTAAGCTGTACG-1	1.42848	-0.876316
WT_AACCTTAAGGACCAGG-1	-2.37298	0.15711
WT_AACGACAAGATGGAGC-1	-6.10773	-1.50093
WT_AACGCCCAGGTCGAGG-1	2.23169	-2.8073
WT_AACGCTAGTTCGCTTG-1	11.8548	-0.0129358
WT_AACGGTAAGGCAACAA-1	-5.77305	2.40614
WT_AACGGTAAGTCTATGA-1	-2.01847	0.342663
WT_AACTACTCACAATTAC-1	7.44883	1.77406
WT_AACTACTCACTATGGC-1	12.5979	4.39866
WT_AACTAGCTCCAAGTTA-1	2.06099	1.11192
WT_AACTAGTGTTCGCGCT-1	-0.285525	1.20663
WT_AACTAGTGTTGCAGTA-1	-8.79615	8.25324
WT_AACTGTTCAAAGCGGC-1	-1.00857	2.50065
WT_AACTGTTCAACTGGGA-1	-0.333642	5.13366
WT_AACTTAGTCAGGTTTA-1	0.574979	5.57681
WT_AAGAACAGTTTGGGCG-1	-1.71479	0.167113
WT_AAGAATCAGACAACAG-1	1.10104	-2.2152
WT_AAGAATCAGCGAGGTG-1	12.8167	6.0143
WT_AAGAATCAGGAGGGTT-1	-3.56349	-11.1515
WT_AAGAATCAGGCATGAA-1	2.08879	-0.926227
WT_AAGACAAGTTTGCTGT-1	9.69722	-0.819893
WT_AAGACATAGCGCTAAT-1	-3.5726	-11.3649
WT_AAGACATAGGGACTAA-1	5.50276	-8.9469
WT_AAGACCAAGCTCAATA-1	-6.19915	-1.10957
WT_AAGACCAAGCTTAACA-1	2.16129	-0.0442821
WT_AAGCAAGTCACTTCAT-1	1.28549	6.52507
WT_AAGCCACGTGGTTCCC-1	-2.56626	-0.542483
WT_AAGCCACGTTTGTGGA-1	-3.10591	-3.3465
WT_AAGCCTCCAACACCTA-1	8.38683	-0.153301
WT_AAGCCTCCACAATGCC-1	0.664606	8.92209
WT_AAGCCTCCACTAAGAA-1	0.570607	-10.1504
WT_AAGCCTCCAGTTAGCC-1	-6.36396	-0.109799
WT_AAGCCTGTCGCAATCG-1	-7.75319	8.05196
WT_AAGCGAATCCATAAGC-1	-0.544786	2.20603
WT_AAGCGAATCCCTGGAA-1	0.721317	4.55634
WT_AAGCGAGGTGGAAACG-1	6.38147	-10.9009
WT_AAGCGAGGTTACATCC-1	-2.3203	2.80352
WT_AAGCGCTGTCGACTAA-1	1.55017	3.04014
WT_AAGCGCTGTTACTTGC-1	-3.03256	-2.25759
WT_AAGCGTTTCAAGCTAC-1	-5.14645	2.43786
WT_AAGCGTTTCTTAATGG-1	-1.94505	0.369059
WT_AAGCTAGAGAATCTCA-1	-13.9264	-3.54352
WT_AAGCTAGAGCAGGCCT-1	1.08628	8.2725
WT_AAGCTAGAGGCACAGG-1	-1.36996	2.38532
WT_AAGCTAGAGTCTCACC-1	-1.13809	-3.02947
WT_AAGCTATGTAAACAAG-1	1.26287	4.67147
WT_AAGCTATGTGCAATAT-1	-0.329576	-2.0128
WT_AAGCTCCCAATTAAGG-1	-7.65364	8.45719
WT_AAGCTCCCACCTACGG-1	-7.53182	8.48454
WT_AAGCTCCCAGGCATGA-1	0.789175	1.49015
WT_AAGCTCCCATTAAGCT-1	-4.04584	-11.3674
WT_AAGCTTGGTTCCTGTG-1	7.08274	-0.771931
WT_AAGGAAGCATCCCGCT-1	4.42925	-8.43314
WT_AAGGAAGCATTCCTCG-1	-3.57496	-10.6435
WT_AAGGATCCATTGCGAC-1	-1.01102	2.08629
WT_AAGGATGTCATGGTGT-1	0.97777	-2.37234
WT_AAGGATGTCGGTTACG-1	0.939306	-1.70983
WT_AAGGATTAGAGAGCCG-1	13.0672	5.51078
WT_AAGGATTAGGCACAGG-1	4.43538	-8.72751
WT_AAGGCCCTCATTAGCA-1	0.345289	1.39021
WT_AAGGTGCAGGAGGTTA-1	0.361946	5.81306
WT_AAGGTGCAGTAAGTCC-1	1.21234	8.40859
WT_AAGTAGCCAATGAAGC-1	-2.98371	2.52037
WT_AAGTAGCCACCAAAGG-1	-7.35567	8.20008
WT_AAGTAGCCACCGGTAT-1	6.62161	0.531934
WT_AAGTAGCCATCGTTCT-1	1.65788	7.95646
WT_AAGTCTATCCCGCAAA-1	-6.52129	8.31608
WT_AAGTGAAGTCGAAGTC-1	6.38644	-10.7839
WT_AAGTGAAGTTACGCAA-1	8.26206	-0.135631
WT_AAGTGAAGTTGAGGTC-1	0.698119	1.6537
WT_AAGTGCAAGCGGATTT-1	0.39792	1.39815
WT_AAGTGCAAGCTTAACA-1	-4.21708	1.31933
WT_AAGTTACGTAGGTGTC-1	-5.13928	2.42275
WT_AAGTTACGTGAACAAA-1	-4.71354	0.906034
WT_AAGTTACGTTAGCAGC-1	-2.4571	0.178071
WT_AAGTTAGCAAACTGCC-1	6.60981	1.9052
WT_AAGTTAGCAAGCCAGA-1	-4.89414	1.04395
WT_AAGTTAGCATAAACCT-1	0.541673	-2.04937
WT_AAGTTTGTCCTCCATA-1	-2.30255	1.8827
WT_AATACCGGTTCCATTA-1	-6.05362	-2.76615
WT_AATAGAGGTATTGGAT-1	5.00627	-9.98221
WT_AATAGAGGTGTGTCCC-1	-13.375	-5.44831
WT_AATATCCCACTCGCTC-1	-0.125065	1.12518
WT_AATATCCCATGCTCCC-1	0.0890567	-1.56963
WT_AATCAGGAGGTCCGTA-1	5.66737	-10.3733
WT_AATCATGTCACGAATC-1	-2.16797	-1.40265
WT_AATCATGTCATAATCG-1	0.630504	1.83615
WT_AATCATGTCCTTCGTA-1	7.71021	1.32998
WT_AATCATGTCGCTATAA-1	12.6296	3.70248
WT_AATCCATCAAGCTTAT-1	11.6927	5.24161
WT_AATCCATCAGGCTGTT-1	-4.31652	0.814447
WT_AATCCATCAGTTTGGC-1	-0.0777376	0.924767
WT_AATCCCTGTGATTACG-1	-4.40415	-10.2015
WT_AATCCGTAGCTTCCCG-1	-2.59141	-2.32311
WT_AATCCGTAGTTAGAGG-1	-0.896591	2.5959
WT_AATCCTAAGGTTACGT-1	-7.70929	8.14145
WT_AATCCTAAGTAAAGGT-1	6.95837	-0.372844
WT_AATCCTAAGTTATTCC-1	4.64205	-8.86251
WT_AATCGCCCACGAATTT-1	1.23113	-8.86347
WT_AATCGCCCAGTAATAG-1	0.606785	3.29256
WT_AATCTTGAGCAGCTAT-1	7.39591	2.27806
WT_AATCTTGAGGCAACAA-1	1.03221	8.50081
WT_AATGAAGGTAATCGCA-1	-3.462	-11.3524
WT_AATGCAACACTAAATC-1	-4.26103	-10.117
WT_AATGCATGTTATCCTA-1	12.9327	4.15671
WT_AATGCGCGTTTAAAGC-1	-3.4654	3.07845
WT_AATGTCATCAAGCCTG-1	2.36846	-0.159778
WT_AATGTCCAGGCGCATC-1	1.22865	8.66892
WT_AATTACCCAATCCTAG-1	-13.3069	-2.70388
WT_AATTACCCAGTTAGCC-1	-4.87798	1.67804
WT_AATTACCCATTCCTGT-1	-13.9972	-3.03751
WT_AATTGACGTACTTCAC-1	9.82609	-0.597422
WT_AATTGACGTGAACAAA-1	-6.05965	0.789364
WT_AATTGACGTTGGATCA-1	0.452127	-7.08415
WT_AATTGCCAGGCTGTGC-1	7.56287	1.35964
WT_AATTGGACAAACCTAT-1	1.2859	-9.54401
WT_AATTGGACAATTAGCT-1	0.10461	6.36524
WT_AATTGGGAGCTACTGG-1	0.987565	7.62561
WT_AATTGGGAGGCTATGT-1	9.24973	-3.23089
WT_AATTGGGAGTGTTGCG-1	1.60937	7.44708
WT_AATTGTGTCAGGGCCT-1	-5.74904	-2.77616
WT_AATTGTGTCCATCAGG-1	5.21142	-8.82822
WT_AATTGTGTCGCATCCT-1	-3.15153	3.12628
WT_AATTGTGTCTGGCAAT-1	0.831988	0.832476
WT_AATTTCCTCGATCAGT-1	4.50714	-9.24743
WT_AATTTCCTCGTTTCTG-1	-3.91638	-0.328439
WT_AATTTCCTCTTGCATT-1	-1.69788	-1.36856
WT_AATTTGGTCCTCGATC-1	0.365817	-7.04347
WT_ACAAACTGTCAGTAAT-1	12.7267	4.51783
WT_ACAAACTGTGACCTGG-1	-3.06136	-1.45174
WT_ACAAACTGTGCTCACC-1	-13.8991	-3.16319
WT_ACAAACTGTTTGGCGG-1	5.41356	-9.24558
WT_ACAAAGGTCCCTCAAC-1	-3.86774	-10.7124
WT_ACAACAACAATTAACC-1	-0.426135	-1.94235
WT_ACAACACTCCAAACAC-1	0.777819	9.24765
WT_ACAACAGAGCTACTGG-1	5.90083	-9.39389
WT_ACAACAGAGTATTGGC-1	9.25004	-3.26088
WT_ACAACAGAGTTACTTC-1	1.83799	-9.14325
WT_ACAACATGTTAAATGC-1	0.359487	-7.01142
WT_ACAACATGTTTATTCG-1	10.6613	-0.350027
WT_ACACAATGTGAGGTAG-1	-3.27025	-1.504
WT_ACACTAGGTAATGGCC-1	4.33415	-8.61219
WT_ACACTAGGTCGTAATG-1	-2.74912	2.1144
WT_ACACTTGCATGGCCTG-1	1.31427	1.59886
WT_ACAGCCGGTTGCCTCA-1	1.18855	6.41398
WT_ACAGCGCTCAGGTTTA-1	1.19394	1.1279
WT_ACAGCGCTCATAGCCG-1	-2.16462	-2.41124
WT_ACAGGAATCCGCCTCA-1	1.103	-9.56948
WT_ACAGGATCACGTAATT-1	7.68237	1.48915
WT_ACAGGATCATTGTTGG-1	0.634246	3.66122
WT_ACAGGCTGTTTGCGAA-1	2.2622	-2.02798
WT_ACAGGTAAGGAACGCG-1	-5.12902	1.84907
WT_ACAGGTAAGTTTCCGC-1	-6.33784	-0.331118
WT_ACAGGTAAGTTTGTCT-1	0.185202	1.04338
WT_ACAGTATGTCACCTAT-1	11.7777	-0.119779
WT_ACAGTATGTCACTCGC-1	-3.63775	-11.0821
WT_ACAGTATGTCATTAGG-1	-7.51334	8.49483
WT_ACATAGCTCCAGGGAG-1	1.02193	-9.41731
WT_ACATCAATCACCTGTC-1	12.8965	4.1469
WT_ACATCAATCCCATAAA-1	1.42797	7.46522
WT_ACATCAATCGAGCAAA-1	-4.21348	1.27045
WT_ACATCATCACAATACT-1	-3.50246	-11.304
WT_ACATCATCAGGAACCA-1	-4.45405	-10.3545
WT_ACATTAGTCAGCAAAG-1	2.45332	-2.85339
WT_ACATTGCAGGCTAATC-1	1.2141	-9.56172
WT_ACATTGCAGTTAGACC-1	-4.30593	0.0828554
WT_ACATTGCAGTTCCCAC-1	-2.52095	-1.71841
WT_ACCAAACTCAGCAAGA-1	-13.2622	-5.61785
WT_ACCAAACTCCTAATAG-1	1.20705	-9.47432
WT_ACCAAACTCTAGCGAT-1	-4.01798	0.181874
WT_ACCAAGCGTTTATTCG-1	0.952016	0.892727
WT_ACCAAGTTCAATACGC-1	2.10842	-0.989197
WT_ACCAAGTTCCCGCATT-1	-3.66797	-11.2651
WT_ACCAAGTTCTCCTCTT-1	-0.905076	1.91875
WT_ACCAATATCAACAAGG-1	0.965306	7.37727
WT_ACCAATATCCATTACT-1	-4.93312	2.24457
WT_ACCACACCATCATGGC-1	-7.60395	7.95373
WT_ACCACACCATGTGGGA-1	1.60653	-9.40089
WT_ACCACACCATTGTCCT-1	-5.8989	-2.55401
WT_ACCACATAGGTTAGAG-1	10.0648	-0.798292
WT_ACCAGGACAATAGTCT-1	-4.20563	-3.05206
WT_ACCAGGACACGAATCC-1	-7.42436	8.18117
WT_ACCAGGACATTTAAGC-1	0.695224	3.92179
WT_ACCAGGCTCGGGATTT-1	0.98215	6.55142
WT_ACCATAATCTAGCGTG-1	1.14119	-0.411166
WT_ACCATTAAGCTACTGG-1	0.829085	5.99651
WT_ACCATTAAGGACCTCA-1	-3.6298	-10.9348
WT_ACCATTAAGGTCGAGG-1	6.22892	-9.58932
WT_ACCCAACCAGGTCCTG-1	-6.63623	8.10934
WT_ACCCAGGGTACAAAGA-1	0.770911	-2.70051
WT_ACCCAGGGTAGCCATA-1	-6.08977	0.815635
WT_ACCCAGGGTCCAAGAC-1	-9.44459	8.53668
WT_ACCCAGGGTGCTTAGA-1	5.42213	-9.77884
WT_ACCCAGGGTGTGCACG-1	0.737212	9.18266
WT_ACCCAGGGTTCCTGAT-1	0.503264	7.84257
WT_ACCCGCTGTAGGTTGC-1	-2.3708	-1.71221
WT_ACCCGCTGTGCCTCAC-1	1.53706	-2.71682
WT_ACCCGTAAGAGCCGGA-1	-5.36424	2.68765
WT_ACCCGTAAGGTCTTGG-1	-1.3728	2.85915
WT_ACCCTCCCATTAGCGC-1	1.11584	-2.35029
WT_ACCCTCCCATTGTGAT-1	-7.11111	8.42544
WT_ACCCTGTTCACCGGTA-1	0.556329	-7.15244
WT_ACCGGCTAGCAGGCCT-1	-2.05944	-0.214013
WT_ACCGGTTCAAAGCGGC-1	1.24877	7.08996
WT_ACCTAAATCATCGTTT-1	0.697528	-2.27021
WT_ACCTAAATCTTGTCTG-1	0.314515	2.12254
WT_ACCTAAGGTGGATGTC-1	-4.3515	0.918992
WT_ACCTAAGGTTACTAGG-1	7.81896	1.63869
WT_ACCTAAGGTTAGGTGC-1	-1.20905	-0.799072
WT_ACCTACCTCCTTGCAC-1	-3.89264	0.484009
WT_ACCTACCTCGTGCTTC-1	7.3223	1.1391
WT_ACCTCACTCCTCATCA-1	-1.8508	-0.218712
WT_ACCTGGATCAGGTCCA-1	-2.47248	-0.0278816
WT_ACCTGGATCCGCAAAT-1	11.7296	5.21844
WT_ACCTGGATCCTAGTAA-1	7.64464	1.01957
WT_ACCTGGTCACGGTTTA-1	5.37787	-9.13615
WT_ACCTGGTCATGTTGCA-1	-6.05273	1.58202
WT_ACCTGTTGTGCTAGAC-1	2.39593	-0.847802
WT_ACCTTCCAGTAATCCA-1	-3.66604	-11.4103
WT_ACCTTGCTCACATTGA-1	1.2769	-9.47322
WT_ACCTTGTGTTAAGGTT-1	-4.41599	-10.311
WT_ACGAACAAGGAAGCAC-1	-1.21341	2.87052
WT_ACGAAGTCAAGGTACG-1	-6.74268	8.12172
WT_ACGACTTAGCACTAGT-1	2.0748	1.38248
WT_ACGACTTAGGGTGGAT-1	-3.76795	-11.0837
WT_ACGACTTAGTGGACAA-1	0.375016	7.73327
WT_ACGAGTAAGGACGTAA-1	13.054	5.58964
WT_ACGAGTAAGTTGTCAA-1	6.51296	0.253159
WT_ACGATTCAGAGCCGCT-1	9.35727	-3.26739
WT_ACGATTCAGTTAGTTG-1	-3.52242	-2.56224
WT_ACGCACGGTAGGATCC-1	-3.92819	-2.65039
WT_ACGCCACAGAACCTGT-1	0.20189	-2.19254
WT_ACGCCACAGTGCTGTG-1	-3.78803	1.37252
WT_ACGCCACAGTTGTCCC-1	-3.43017	-2.50766
WT_ACGCCTAAGGAACCGG-1	-3.26205	3.02559
WT_ACGCCTAAGTCAGGCC-1	0.414992	-7.08654
WT_ACGCCTAAGTTTGTCT-1	-3.75873	-0.288451
WT_ACGCCTTTCTACCTCA-1	12.666	3.75427
WT_ACGGGAAGTCCAAGAC-1	12.9838	4.76966
WT_ACGGGAAGTTGACTTC-1	-0.62832	-1.42226
WT_ACGGTACGTCAAAGGG-1	0.877224	4.70686
WT_ACGGTACGTTGGTTCT-1	1.6298	7.56618
WT_ACGGTTAGTCAAGTAT-1	-1.90623	-1.11298
WT_ACGGTTTAGTAACCCG-1	-3.43266	-2.47946
WT_ACGTACCCACCAGCAT-1	0.303486	-2.55576
WT_ACGTCAAGTGTTGTAG-1	6.08521	-10.497
WT_ACGTCCAAGGACTAAG-1	-1.20335	-0.766733
WT_ACGTCCAAGGCCAATT-1	1.31114	-9.16166
WT_ACGTCCTTCTCTAGCC-1	0.752176	-2.58552
WT_ACGTCCTTCTGTAATG-1	-0.764472	-0.295201
WT_ACGTTACAGAGGCTAA-1	10.341	-0.819139
WT_ACGTTACAGGTAAGCA-1	-2.97594	-2.65803
WT_ACGTTACAGTAAAGGT-1	-7.06432	8.33404
WT_ACGTTACAGTTACTTC-1	0.435741	6.81714
WT_ACGTTGTAGACAAACG-1	0.543202	-10.1452
WT_ACGTTGTAGCCATCAG-1	-13.7212	-3.62764
WT_ACTAACCAGGCTGGCT-1	-2.87707	0.485707
WT_ACTAACGGTCTCAGCC-1	0.85496	-7.91265
WT_ACTAACGGTGGTTAGC-1	-1.83129	-0.824608
WT_ACTAACTCACAGGAAT-1	-2.2683	2.12169
WT_ACTAACTCAGTATGTT-1	-0.27191	2.19125
WT_ACTAACTCATAATGTC-1	1.88796	-1.37805
WT_ACTAACTCATGTCGCG-1	-10.0292	8.64726
WT_ACTAATCCAAGGTAAC-1	1.216	-9.39103
WT_ACTAATCCAATATACC-1	0.878268	-1.66454
WT_ACTATCCGTTAGCAGC-1	2.06575	-0.778963
WT_ACTATCCGTTGAATCG-1	-2.82925	2.75439
WT_ACTATGTCAAGCCACT-1	1.81107	-1.04256
WT_ACTCACCTCTAACCAA-1	-3.02925	3.1938
WT_ACTCAGTAGCATTTCT-1	0.674504	-9.86567
WT_ACTCAGTAGCTGGCTA-1	-2.55393	2.11364
WT_ACTCAGTAGGGTTAGA-1	2.11785	1.33221
WT_ACTCCTCAGGTGAAGC-1	2.69542	-2.06834
WT_ACTCGCTTCGATCAGT-1	-13.6125	-4.21533
WT_ACTCGCTTCGTCATTT-1	0.491401	8.12879
WT_ACTGAATGTCCGGTTC-1	-0.359678	-2.04206
WT_ACTTACAAGGCCTTAG-1	-13.7694	-2.97093
WT_ACTTAGGGTTACGCGG-1	5.88465	-10.1374
WT_ACTTATCTCATTGCAA-1	13.2408	4.97244
WT_ACTTATCTCCTTCTAG-1	-7.26039	8.04859
WT_ACTTATCTCTAACTGA-1	7.44296	-0.46635
WT_ACTTATGAGGAACGCG-1	-2.9043	-3.30465
WT_ACTTCGCTCCAAACAC-1	12.8385	4.9145
WT_ACTTCGCTCTGCAAAC-1	0.547209	-10.1698
WT_ACTTGAATCAAAGGCA-1	0.530464	-7.09204
WT_ACTTGAATCATGGTTA-1	-4.28682	0.891247
WT_ACTTGAATCTATGACA-1	0.188882	-2.64575
WT_ACTTGCACAATGAGGT-1	7.16719	2.24517
WT_ACTTGCACAGCAATAA-1	-4.83233	-2.92095
WT_ACTTGCACAGCCAGAA-1	8.28158	0.0439807
WT_ACTTGTAAGTAGGATG-1	-4.28332	-11.0502
WT_ACTTGTCGTAGTAAGA-1	-1.2262	-1.30915
WT_ACTTGTCGTTAATGCG-1	0.909378	-1.51523
WT_ACTTGTCGTTCCTCCT-1	-7.49041	8.30995
WT_ACTTGTCGTTGGCCGA-1	13.0714	5.32063
WT_ACTTTGTTCCTAAATG-1	1.04174	8.79076
WT_AGAAACCCAATCTCTC-1	-5.20771	1.3199
WT_AGAAACTAGCTGAGGG-1	-3.92278	0.517311
WT_AGAACCAAGCTGCACA-1	-2.08513	-0.0801533
WT_AGAAGGTGTAAGCACC-1	1.24474	4.98743
WT_AGAAGGTGTGAGCACT-1	1.09008	1.66166
WT_AGAATCGAGAATCTCA-1	-2.15656	2.17514
WT_AGAATCGAGCATGGTT-1	0.78042	4.79111
WT_AGAATCGAGTTTGGGT-1	1.97893	-0.994326
WT_AGAATCTGTTACTTCA-1	8.09876	1.03479
WT_AGACAATAGTTGTCCC-1	-4.88692	3.16571
WT_AGACACGCAATCCTGA-1	-13.8272	-3.36092
WT_AGACACGCAATTAGGA-1	0.9992	6.72187
WT_AGACCCGGTATTACCC-1	0.650194	-10.0977
WT_AGACTATGTCACCAAA-1	-0.174524	2.01088
WT_AGACTATGTCATAGAT-1	4.41791	-8.28229
WT_AGACTATGTGCTCCGT-1	-13.8803	-3.18636
WT_AGAGAAGCAAACCTAT-1	-0.340247	-2.95807
WT_AGAGAAGCAAGCTACC-1	2.31567	-1.70689
WT_AGAGATTAGGCTACTG-1	-0.705577	-1.3645
WT_AGAGGAACAGCACGAA-1	-0.917767	0.69313
WT_AGAGGATGTACCAGGT-1	-1.96232	1.54726
WT_AGATGAAGTAGCCATA-1	0.903773	-9.84245
WT_AGCAAATAGGAACGCG-1	7.80649	-0.366283
WT_AGCAAATAGGAGGTTA-1	-3.22639	3.09717
WT_AGCAACAAGCAAGACA-1	4.94029	-9.8036
WT_AGCAACAAGCCGCTTT-1	-1.83257	-0.392323
WT_AGCAACAAGGCGGGTA-1	0.847262	5.63903
WT_AGCAAGGGTGTGCAAC-1	1.62216	8.15453
WT_AGCACAGCAAAGCTCC-1	-0.26604	1.06041
WT_AGCACAGCATACCCGG-1	-3.64571	-11.3438
WT_AGCACAGCATTCAGCA-1	-5.44603	2.44266
WT_AGCACTAGTAGCTAGC-1	0.421061	-2.5178
WT_AGCACTAGTGCCTCAC-1	-3.74638	0.570284
WT_AGCAGGTAGGGACTAA-1	-5.15912	-2.53664
WT_AGCAGGTAGTAACGAG-1	5.74646	-9.0609
WT_AGCATTTCATGCTCCC-1	-1.9962	-1.53269
WT_AGCCAGTGTATACTGG-1	4.94798	-8.80144
WT_AGCCAGTGTCGCAAAC-1	-2.00174	1.60441
WT_AGCCAGTGTGCTGTAA-1	6.1131	-10.797
WT_AGCCGCTAGTCACTAA-1	0.33902	2.00989
WT_AGCCTAAGTGAGGTAG-1	-4.3833	0.281408
WT_AGCCTAGTCCAATTAG-1	-4.32039	-10.1281
WT_AGCCTCCGTCACGGAT-1	0.964762	-2.45336
WT_AGCGATTTCAAGTGTC-1	-4.02975	-10.7356
WT_AGCGATTTCATTGCAA-1	1.22825	-9.28798
WT_AGCGATTTCGAGGTGG-1	5.41169	-9.7505
WT_AGCGCTCAGCCACAAT-1	-5.00561	0.108618
WT_AGCGGATAGGCTAGAA-1	-4.95841	1.22656
WT_AGCTAACTCACGTTAA-1	1.0094	6.0571
WT_AGCTACGTCATTGCGG-1	4.33533	-8.34391
WT_AGCTAGTTCAGGCTAT-1	7.47417	2.05943
WT_AGCTATATCGACAAAG-1	12.8786	4.20748
WT_AGCTCATAGCGGATAA-1	1.80807	1.37086
WT_AGCTTAATCGTTTCGC-1	0.18415	7.79481
WT_AGCTTAATCTAAATCG-1	-0.711294	2.30187
WT_AGCTTCCTCAGCACGC-1	12.6945	5.19022
WT_AGCTTCCTCTCCTCTT-1	-4.20741	3.2165
WT_AGCTTGGTCGTTATCT-1	-5.41892	2.84662
WT_AGCTTGGTCTACTAAG-1	0.230066	5.97378
WT_AGCTTTAAGCCACAAT-1	0.653958	-10.0616
WT_AGGAACCAGCTTTGGG-1	6.96345	-0.81108
WT_AGGAACGGTGTGCAAC-1	-0.712221	-1.49182
WT_AGGACGTAGGGTCCAC-1	-2.49255	2.75972
WT_AGGACGTAGGTGAAAT-1	-1.63663	1.53971
WT_AGGACTAAGGCCTGGT-1	-3.85235	-2.71039
WT_AGGAGCTAGGTAGCTT-1	-2.36003	-0.857932
WT_AGGATCCGTGAGCACT-1	7.56245	2.01174
WT_AGGATGTCAAGTAAGC-1	11.0753	-0.656437
WT_AGGATGTCAAGTCGCT-1	-3.37644	3.10234
WT_AGGATTGAGGAACGGT-1	-0.562047	2.40823
WT_AGGATTGAGGCATTAC-1	8.78963	0.281392
WT_AGGATTGAGTGCTGTG-1	1.71563	6.51987
WT_AGGCAGGTCCAGGTCA-1	-1.92696	-0.371064
WT_AGGCCCAGTATTGTCC-1	-0.0119441	2.10624
WT_AGGCCCAGTCATTGTC-1	1.53645	1.02818
WT_AGGCCCAGTTAGGTTG-1	-3.63632	-11.0533
WT_AGGCGGATCACAGCCA-1	-1.16863	1.56661
WT_AGGCGGATCTAACCTT-1	0.545497	1.77474
WT_AGGCTAAAGCAGGTGG-1	-2.6926	-0.235551
WT_AGGCTAAAGCAGGTTT-1	1.38103	-1.95708
WT_AGGCTAAAGCTTGCTC-1	7.53844	1.10714
WT_AGGCTAGCAAGGACCA-1	-2.45864	1.69636
WT_AGGCTAGCAGCTCAAC-1	-8.11054	8.1623
WT_AGGGCCTTCATGTCAA-1	-3.12269	2.20454
WT_AGGGCCTTCCGCTAGA-1	-2.06377	-0.293495
WT_AGGGCCTTCGGGATTT-1	-4.37651	-10.5776
WT_AGGGCTACAACGTGCT-1	1.22778	-8.94455
WT_AGGGCTACAACTAGGG-1	0.510722	-6.98044
WT_AGGGCTACATGGAGGC-1	0.760005	-7.61387
WT_AGGTAACCAGCATGGA-1	8.70594	0.256075
WT_AGGTAACCAGCATTAT-1	-13.8441	-2.99385
WT_AGGTACGCAACACTTG-1	-2.7999	2.71479
WT_AGGTACGCATCTTGAG-1	12.8339	4.42971
WT_AGGTATTGTTTGGGCG-1	0.452216	-2.4803
WT_AGGTCAAAGTAGCCAT-1	2.56267	-2.60814
WT_AGGTCATTCGTCAAGT-1	1.81269	-9.1068
WT_AGGTCATTCGTCATTT-1	-6.06326	1.51977
WT_AGGTCATTCTTACTCG-1	-0.309088	-2.34446
WT_AGGTCCGGTAGGATCC-1	-7.01974	8.34635
WT_AGGTCTTAGGAAGTAT-1	0.583461	3.0643
WT_AGGTGAATCTTGACCC-1	-2.40494	-1.55173
WT_AGGTGAGGTTCGGTAA-1	0.543592	-10.1182
WT_AGGTTAACATACCCGG-1	-3.73776	-10.894
WT_AGGTTAACATCTAGCA-1	-4.39155	-0.0231621
WT_AGGTTAGAGCCATCAG-1	-1.97127	0.721945
WT_AGGTTGCGTGATGAAA-1	1.05973	1.72004
WT_AGGTTTATCTTGAGGT-1	0.660209	-10.0588
WT_AGGTTTGGTTGTCCAT-1	0.944799	5.38454
WT_AGTAAACAGCACGTTG-1	0.879546	5.9851
WT_AGTAAACAGTGCTGTG-1	0.031913	-2.00551
WT_AGTAAACAGTTATTCC-1	9.7408	-0.642508
WT_AGTAACCTCTCCTCAA-1	-5.06135	3.04019
WT_AGTAACGAGCAACAAG-1	-2.02808	0.972451
WT_AGTAACGAGCATCCAG-1	12.8815	5.77386
WT_AGTAACGAGCCTGAGC-1	-2.50763	1.74886
WT_AGTAACGAGGCCAATT-1	-3.54761	-10.6617
WT_AGTAAGTAGCAAACCT-1	2.61991	-1.96833
WT_AGTAAGTAGGTTACGT-1	0.981433	6.38907
WT_AGTAAGTAGTGAGAGC-1	0.430545	-7.04521
WT_AGTAAGTAGTTAGGCT-1	-2.48391	2.64234
WT_AGTAATGCAAACGGGC-1	-7.40198	7.96441
WT_AGTAATGCAAGCTTTG-1	11.0714	-0.477464
WT_AGTAATGCAGCAAGTG-1	0.210677	6.10158
WT_AGTACGCGTATTGTCC-1	-1.89884	-1.37724
WT_AGTACGCGTTCGCGCT-1	11.1419	-0.542935
WT_AGTACGCGTTTCGCGC-1	6.05619	0.431719
WT_AGTAGCTTCAAACACC-1	0.226139	1.1611
WT_AGTAGGATCAGGTCCA-1	1.70668	2.02861
WT_AGTAGGATCCTTCAAT-1	-4.69001	3.25319
WT_AGTATAGCAAATTGCT-1	1.87176	-0.251791
WT_AGTCAAGAGGGTCTAT-1	-5.47692	2.78949
WT_AGTCAAGAGTGAACAG-1	0.690729	-7.2982
WT_AGTCAATGTCCTTTAA-1	0.993011	0.965421
WT_AGTCAATGTTGGATCA-1	1.84398	-0.713455
WT_AGTCAGGCACCAGCAT-1	2.1548	-2.69214
WT_AGTCCTGAGTAAGGGC-1	3.88725	-8.07756
WT_AGTCCTGAGTCAGGCC-1	-3.25999	-2.02788
WT_AGTCCTTGTTAATGAC-1	9.53817	-3.58162
WT_AGTCGCATCCGTGACA-1	1.24738	5.56076
WT_AGTCGCATCGCACAAT-1	-2.42704	-0.991933
WT_AGTCGCATCTTCAATC-1	6.82919	2.33031
WT_AGTGATGAGGAGGTTA-1	-7.44914	8.40199
WT_AGTGCACGTATACTGG-1	-13.7671	-3.4546
WT_AGTGCCGGTCACCTAT-1	-2.05565	1.02693
WT_AGTGCGGAGGTGAAGC-1	-2.34608	3.05994
WT_AGTGGACAGTAAGGGC-1	-2.65405	3.30059
WT_AGTGTGGCAAACCCTA-1	-4.52132	-10.0972
WT_AGTGTGGCAATATACC-1	5.56836	-9.43179
WT_AGTGTTTCACAATACT-1	0.427433	8.32955
WT_AGTGTTTCACAGGATG-1	-6.02038	-2.81604
WT_AGTGTTTCAGCCTAAC-1	1.15909	-8.9726
WT_AGTGTTTCATTAAGTC-1	1.63634	8.64491
WT_AGTTACATCGTTCACC-1	9.75412	-0.589684
WT_AGTTACTCATTATGAC-1	0.493699	8.99126
WT_AGTTATGTCATGCCTC-1	-3.09255	0.618333
WT_AGTTATGTCTTTGTAC-1	0.191476	2.22745
WT_AGTTGGCGTTGAAGCC-1	0.53408	-10.16
WT_AGTTTGATCCGCACAA-1	-4.55568	-10.2901
WT_AGTTTGATCTTGGATA-1	0.511519	-7.16017
WT_AGTTTGATCTTTAAGG-1	1.94994	0.994344
WT_AGTTTGCAGTTAGGCT-1	4.41089	-9.36802
WT_ATAACGACAGGAACAT-1	6.00688	-9.4648
WT_ATAACGACATGAAATG-1	9.75852	-0.808078
WT_ATAATGGCAATAATCC-1	-2.41209	-2.17341
WT_ATAATGGCAATCCTGA-1	-0.220408	-1.26674
WT_ATAATGGCAGCACGTT-1	0.916669	6.17382
WT_ATAGATGCAATTGACT-1	0.043785	7.59538
WT_ATAGCATGTGTTAAAC-1	6.48815	2.4472
WT_ATATAGGCAACCCTAA-1	-3.73233	1.26532
WT_ATATAGGCATGACTAT-1	-3.52062	-11.1771
WT_ATATGCATCCCTGATC-1	-4.94043	1.50777
WT_ATATGCATCGATATTG-1	-3.76309	3.11762
WT_ATATGCATCGGTCAGC-1	-0.625422	-1.37853
WT_ATATGCTCAGGACACA-1	4.75327	-9.23946
WT_ATATGGTGTGCAACTA-1	0.85792	9.28713
WT_ATATGTCCACATAACT-1	1.78402	-1.47819
WT_ATATGTCCATAATGAG-1	11.1077	-0.464664
WT_ATCAAGACAAAGCCTC-1	10.1476	-0.624204
WT_ATCAAGACAAGGTCGA-1	0.729639	8.51065
WT_ATCAAGACAATAGCCC-1	1.3157	1.01678
WT_ATCAAGACACAGGATG-1	5.20954	-9.64041
WT_ATCACAATCATAACGC-1	0.834289	4.73839
WT_ATCACAATCTAATTGG-1	-3.98567	3.12881
WT_ATCACACAGCTGGACC-1	0.60873	-10.0356
WT_ATCACACAGGTTTGAC-1	1.45966	1.08844
WT_ATCAGGTTCAGCATTA-1	-3.56406	-10.8499
WT_ATCAGGTTCCTGGCTT-1	4.83209	-9.17784
WT_ATCAGGTTCTTGAGCG-1	0.576994	3.20619
WT_ATCAGGTTCTTGGACG-1	5.9478	-10.2884
WT_ATCATCAAGCACCACA-1	8.77577	0.365561
WT_ATCATCAAGCCTGACA-1	-5.98276	-1.69941
WT_ATCCACCTCGAGGTGG-1	0.353915	-2.02048
WT_ATCCACCTCTCACACC-1	7.21721	-0.462096
WT_ATCCACCTCTTGAGGT-1	-7.74472	7.9879
WT_ATCCCGCGTCACACCC-1	-2.57233	3.30218
WT_ATCCCGCGTTAGTGAT-1	9.77688	-0.774411
WT_ATCCGTGAGCTCAAAC-1	-1.08878	1.60938
WT_ATCCTCATCTTAAGTG-1	5.34803	-8.93723
WT_ATCCTGACAAACCCTA-1	8.81082	0.222638
WT_ATCGCCCGTACGTTTC-1	1.8661	-9.2586
WT_ATCGCTTGTATTTGGG-1	0.0802467	3.97927
WT_ATCGCTTGTCATAGAT-1	0.897465	6.67309
WT_ATCGCTTGTCCTTCAG-1	-3.40129	-2.261
WT_ATCGCTTGTGGATTGC-1	0.659743	3.63921
WT_ATCGGCCAGCACGATT-1	1.81386	1.97526
WT_ATCGGCCAGGTATTGC-1	7.03223	1.31973
WT_ATCGGCCAGTCACCAG-1	-3.96321	-0.340716
WT_ATCGGCCAGTGTGATC-1	-6.08477	-2.85676
WT_ATCGGCCAGTTCCCAC-1	-3.96633	-2.84156
WT_ATCTATGAGTGACCTG-1	0.737601	-2.36589
WT_ATCTTTGGTGTTAAAC-1	12.8304	4.22999
WT_ATGAAGCCAGTTATGT-1	7.52175	1.36865
WT_ATGAAGTAGTAACGGA-1	-13.5852	-2.99206
WT_ATGAATGCAATATACC-1	7.93652	1.95459
WT_ATGAATGCATTAAGCT-1	0.802276	-1.57089
WT_ATGACAACAAGGTCGA-1	-1.46824	1.86069
WT_ATGACAACATCACAGC-1	4.56904	-8.88647
WT_ATGACGAAGGCTATGT-1	-2.72398	-0.468875
WT_ATGACGAAGTTATGTG-1	-5.21092	2.96227
WT_ATGACTCAGCTGGCTA-1	-2.6737	0.661995
WT_ATGACTCAGTCGCAAT-1	11.0649	-0.394983
WT_ATGAGCCGTGCCGCAA-1	-4.26498	0.133609
WT_ATGATGACACAAAGCG-1	0.865026	-7.93463
WT_ATGCAAACAATAGCAA-1	-5.02544	3.112
WT_ATGCAGGCACATAGCC-1	0.811075	-1.52601
WT_ATGCATTCAATAGTCT-1	3.97721	-8.99387
WT_ATGCGATTCATAACTG-1	-6.96167	8.43476
WT_ATGGACAAGCCGCTAA-1	1.19885	1.54247
WT_ATGGCCCAGACTATTG-1	-1.78679	-0.0627897
WT_ATGGCCCAGAGGATAT-1	-3.83317	-11.4918
WT_ATGGCTGTCACAGACT-1	-13.6607	-3.58283
WT_ATGGCTGTCTACCTAT-1	-3.7499	-10.742
WT_ATGGCTTAGGTTTACA-1	7.01809	-0.77359
WT_ATGGTCTAGCATGCAT-1	0.695587	-10.0923
WT_ATGGTCTAGCTGAGGG-1	12.1306	-0.142084
WT_ATGGTCTAGTGAGAGC-1	6.09736	-10.2485
WT_ATGGTGCGTCAATAGT-1	-6.55219	8.27345
WT_ATGGTGCGTCCTGATT-1	6.94548	-0.621704
WT_ATGTAAGCAGGGAGGA-1	9.54775	-3.59523
WT_ATGTCAATCGGTCAAT-1	5.53535	-8.99847
WT_ATGTCATCAACACCTA-1	12.9649	4.11042
WT_ATGTCCACATAAGTCT-1	7.7881	1.5303
WT_ATGTGAGAGTTGTCAA-1	-3.47514	-10.6577
WT_ATGTTGTCAAACGGGC-1	2.58364	-0.599137
WT_ATGTTTGAGCGTGCAC-1	0.884351	-1.56225
WT_ATTACCGCACCTACTT-1	1.05507	6.96687
WT_ATTACCGCAGCCGCTA-1	-2.06666	-1.44157
WT_ATTACCGCAGTAGCCT-1	1.06537	8.98458
WT_ATTACTGAGGAAGCTA-1	-6.06997	1.21034
WT_ATTACTGAGGCACAGG-1	-4.06206	-11.3808
WT_ATTAGCGGTTTGTTGC-1	-1.80376	1.32125
WT_ATTAGCTCAAGTCGCT-1	-3.53251	-10.7607
WT_ATTAGCTCAATGAGGT-1	5.35657	-8.82514
WT_ATTAGCTCAATTAGCT-1	-9.27694	8.38623
WT_ATTAGCTCATAAGGAC-1	0.256521	-2.65026
WT_ATTAGGTGTATGTGGC-1	-5.0501	2.13637
WT_ATTAGGTGTCACACCC-1	-6.63605	8.1065
WT_ATTAGGTGTTAAATGC-1	-2.41683	-1.99633
WT_ATTAGGTGTTGCACAA-1	-13.5057	-4.45021
WT_ATTAGTCCATTAGCGC-1	-2.92638	3.21032
WT_ATTATCCTCCGGTATG-1	-4.38931	-10.3531
WT_ATTCACTTCCTTGAGG-1	-13.8588	-3.35067
WT_ATTCATGAGGCAGGTG-1	6.04171	-10.4033
WT_ATTCATGAGTTAGCTA-1	0.76497	-2.63286
WT_ATTCCTAGTGCTAGAC-1	-4.57603	0.539248
WT_ATTCCTCCATCATGGC-1	-3.13975	3.29479
WT_ATTCGTTTCATCCTCA-1	-4.79561	1.67351
WT_ATTCGTTTCATTCATC-1	12.9465	4.16618
WT_ATTGAAGCAGGATGGC-1	1.62745	8.97771
WT_ATTGAAGCATAATCGT-1	-4.90717	1.33636
WT_ATTGACTCACTTCACT-1	9.09907	-0.0187375
WT_ATTGACTCATTAAACC-1	-3.06837	-0.773903
WT_ATTGCACAGCCAGTAT-1	7.15802	-0.706823
WT_ATTGCACAGTAGCGGG-1	0.694041	-10.0366
WT_ATTGCGCCAAATTCGT-1	-3.64295	-2.36354
WT_ATTGCGCCAATAATGG-1	7.7475	1.35323
WT_ATTGCTCGTGTTGTGA-1	-2.17077	-0.026814
WT_ATTGGCTAGCTTATGA-1	-13.9766	-2.93848
WT_ATTGGCTAGTCAATTG-1	-2.47425	2.95494
WT_ATTTAGCCATAGCTTG-1	-5.89911	-2.51676
WT_ATTTGCAAGCGATACT-1	-4.30469	0.816778
WT_ATTTGTGAGTAGGCGG-1	0.664039	3.85179
WT_CAAACACTCATGGCTG-1	0.443956	-7.03757
WT_CAAACACTCGTTTCTG-1	-1.37167	1.34953
WT_CAAACATGTCAAGACC-1	2.00802	-1.08901
WT_CAAACCGTCATCCTCA-1	0.883792	6.16647
WT_CAAACCGTCCAACTGG-1	-4.06291	-10.9026
WT_CAAACCGTCCTTGAGG-1	0.765971	-7.62685
WT_CAAACCGTCGTAATCA-1	-4.84652	-2.35615
WT_CAAACGCGTTACGCAA-1	9.59142	-3.63032
WT_CAAACGCGTTCCATTA-1	6.74134	0.421352
WT_CAAACTGGTAGGTTGC-1	5.05626	-10.0166
WT_CAAACTGGTGCTTTAC-1	1.20349	8.30865
WT_CAAACTGGTGGATTAT-1	2.43948	-2.44106
WT_CAAACTGGTTAGTTGG-1	6.93839	-1.00139
WT_CAAAGGATCGGTCAAT-1	0.839692	-2.38671
WT_CAAAGTGAGGAGCAAC-1	5.85304	-10.4212
WT_CAAAGTGAGGCTACTG-1	-1.20291	-0.583209
WT_CAAATCATCCAGGGAG-1	-2.31073	0.138327
WT_CAAATCATCCTTAGGG-1	-13.7401	-3.47924
WT_CAACAATGTCGAAGTC-1	0.42274	-7.06898
WT_CAACAATGTTCTTTAG-1	-13.9013	-2.90764
WT_CAACAGGCAAAGGCCA-1	-13.9325	-3.14204
WT_CAACAGGCAAGGCCAA-1	0.632186	-10.0502
WT_CAACAGGCAATAACCT-1	2.76322	-2.32996
WT_CAACAGGCAGCCGCTA-1	4.76561	-9.26013
WT_CAACCCTTCAAGCTTA-1	-3.941	0.741783
WT_CAACCCTTCAGGTCCA-1	1.66193	-0.857765
WT_CAACCGGGTGGAGCAA-1	0.71262	-2.72256
WT_CAACTAATCTGCAACG-1	-8.35392	8.11495
WT_CAAGAACCAGCTAACC-1	7.64254	1.67653
WT_CAAGACAAGATGGAGC-1	0.950709	9.02669
WT_CAAGCTAGTTGCGTAA-1	11.4993	-0.151001
WT_CAAGGCCTCTGGCAAT-1	6.89548	0.81475
WT_CAAGGTTTCGTAATCA-1	0.636749	9.02311
WT_CAAGGTTTCTAATCCT-1	4.32813	-9.30718
WT_CAAGTAACAATACTGT-1	4.45445	-8.6237
WT_CAAGTAACATCACTTC-1	-3.86466	-1.93073
WT_CAAGTAACATGCTTAG-1	-1.18804	0.910269
WT_CAAGTAACATTAAGTC-1	-1.98152	-0.556393
WT_CAAGTGAAGAAGCTAG-1	-5.28789	-2.40214
WT_CAATATGTCTTAGTGA-1	-1.59355	-2.45685
WT_CAATCCCTCTCAATAG-1	-6.32783	0.411372
WT_CAATCCTGTAACAGGG-1	-4.25431	-3.12135
WT_CAATCCTGTTGAGCCG-1	6.05296	-9.78576
WT_CAATCTAAGCCGCAGT-1	-3.32723	-2.50137
WT_CAATCTAAGTTAGTTG-1	-2.6044	1.80491
WT_CAATGAACAGGCTAAG-1	-7.52946	8.0112
WT_CAATGCCCAGCAACCT-1	1.00142	-9.78406
WT_CAATGTCAGTAGGCGG-1	0.898683	-8.00929
WT_CACAATATCGGGACTC-1	-1.13138	-1.47404
WT_CACAGGCTCAGCAAAG-1	0.289283	-2.1732
WT_CACAGGCTCTCTAGCC-1	0.817727	4.08542
WT_CACAGGGAGCCACATG-1	-4.7826	0.53349
WT_CACAGGGAGGTTTACA-1	0.911359	-2.59859
WT_CACAGGGAGTAACGAG-1	1.00792	-9.41697
WT_CACAGGGAGTCATTGA-1	1.22873	5.29392
WT_CACATACAGTGGACAA-1	-4.88161	0.0261371
WT_CACATTAAGCTGGCTA-1	-13.7393	-2.85063
WT_CACCAACCATTAGGTT-1	-5.05525	1.02381
WT_CACCTCAGTTGCACAA-1	-3.57918	-10.4992
WT_CACCTGTTCCTAAGAC-1	-2.73037	2.53339
WT_CACGCAATCATTAGCA-1	1.31043	-8.98589
WT_CACGCAATCATTGCAA-1	-3.9952	0.160591
WT_CACTAAGGTCATAGAT-1	-3.753	-11.2657
WT_CACTTAAAGGACAATG-1	-4.52865	3.2652
WT_CACTTTGTCAATGTGC-1	1.2199	6.30393
WT_CACTTTGTCGCTAGCA-1	12.838	4.18213
WT_CAGAACCGTTCTTTAG-1	-3.78841	3.20562
WT_CAGAATCTCGAGGTGG-1	5.23449	-7.86976
WT_CAGATTCAGTCACTCC-1	4.37769	-8.59058
WT_CAGCAAGCAATGAGGT-1	11.3003	-0.612628
WT_CAGCAAGCACAGGATG-1	2.5738	-0.466458
WT_CAGCAAGCACCTGTAA-1	5.15488	-9.99978
WT_CAGCATGTCATTGCAA-1	-1.02161	3.6608
WT_CAGCATGTCGGTCATG-1	2.16898	1.54053
WT_CAGCCAATCATTACAG-1	-2.33277	-0.153773
WT_CAGCCTAAGATGGACA-1	-4.50538	-10.206
WT_CAGCCTAAGTACTGGT-1	4.66429	-9.6554
WT_CAGCCTTTCATTATGG-1	-2.55399	-3.28133
WT_CAGCCTTTCGAAGTGA-1	1.61268	-8.77955
WT_CAGCCTTTCGATATTG-1	13.0077	4.33531
WT_CAGCCTTTCTTTAGGA-1	-7.82177	7.94887
WT_CAGCTAAGTTATGTGG-1	-2.37227	0.355174
WT_CAGCTATAGTAACGGA-1	7.62113	1.51542
WT_CAGCTATAGTCACCAG-1	2.68128	-2.63433
WT_CAGCTCAAGCATGGTT-1	4.69759	-8.97996
WT_CAGCTCAAGCATGTTA-1	-3.12559	0.0888159
WT_CAGGACACACAATGCC-1	0.353065	2.10734
WT_CAGGACACATAGCTTG-1	-1.89954	1.39184
WT_CAGGACCTCTTAGCGG-1	12.6281	5.06027
WT_CAGGTCCAGACAGGTA-1	-5.44227	3.09327
WT_CAGGTCCAGGGATGAC-1	1.56888	9.13604
WT_CAGGTCCAGTCCTGAG-1	5.42048	-9.41248
WT_CAGGTGGAGTTATCCT-1	12.732	5.9619
WT_CAGGTTAGTTAGTACG-1	7.18069	-0.50132
WT_CAGGTTTAGTTCCCGT-1	-4.55314	-2.40167
WT_CAGTACCCATACTCCT-1	-3.61972	-11.0745
WT_CAGTATGGTACGGTAC-1	-4.00315	0.393874
WT_CATAACGGTGCTCCAC-1	1.85925	-0.72865
WT_CATAAGCTCAGGTTTA-1	-2.4205	2.41596
WT_CATAAGCTCCGGCTAA-1	-8.49643	8.52706
WT_CATAATCCAATCCCTT-1	-0.114982	4.73042
WT_CATAATCCAATTAGCT-1	0.730909	-2.89072
WT_CATAGACTCTTAGGGT-1	9.52142	-0.372063
WT_CATAGCTAGCGCTAAT-1	-1.81556	-0.257094
WT_CATAGGCGTTGACTTC-1	-5.00093	0.768722
WT_CATAGGTTCATTATGG-1	-3.27148	-2.02542
WT_CATAGGTTCCACCCTG-1	-6.64116	8.27323
WT_CATAGTCAGACTCGCA-1	4.25586	-8.38669
WT_CATAGTCAGTTGCCTC-1	-2.12893	-0.973973
WT_CATATCGCACTAAGAA-1	1.82544	1.28753
WT_CATATCGCATAGCTTG-1	2.32466	-2.81682
WT_CATCAATCAACTAGCC-1	10.7833	-1.05586
WT_CATCAATCACCTGCCT-1	7.91299	1.03993
WT_CATCACACACAGCCAT-1	-6.30807	0.699245
WT_CATCAGCCACGAACAG-1	-1.80157	0.54266
WT_CATCATAAGGTCCACA-1	-1.75828	0.784528
WT_CATCATGCAATCCCTT-1	-0.0187383	-1.28355
WT_CATCATGCATTAGGTT-1	-3.73211	0.57467
WT_CATCGCTTCTAATCCT-1	4.29976	-9.14644
WT_CATGCAAGTAACCACA-1	4.96044	-9.31226
WT_CATGCAAGTCATCATC-1	10.1623	-0.421912
WT_CATGCATAGAATCGCT-1	-5.24525	2.73134
WT_CATGCATAGACTCGCA-1	0.972793	-9.79333
WT_CATGCATAGTCCTTTG-1	-1.16268	-2.27479
WT_CATGCGCAGAGAGCCG-1	-3.03742	3.33903
WT_CATGCGCAGATGGAGC-1	0.957896	9.17798
WT_CATGCGCAGGTCTTGG-1	1.50534	1.56393
WT_CATGCGCAGTAACCAC-1	-4.37425	-10.3934
WT_CATGCGGGTGAGCGAA-1	1.44623	0.109121
WT_CATGGATTCCTTCTAG-1	0.874802	-1.60962
WT_CATGGATTCGCTTGCT-1	-3.46854	-11.1422
WT_CATGGATTCTCGCCTG-1	-5.7714	-1.9602
WT_CATGGCGGTTACCTGT-1	-0.584446	2.21448
WT_CATGGCGGTTTACCGT-1	12.707	5.4737
WT_CATTATGAGCTGGCTA-1	-4.85081	0.965605
WT_CATTATGAGGCTAGAA-1	-0.0826494	-1.91073
WT_CATTCATTCAAGACTC-1	0.32518	5.9784
WT_CATTCCTCACAAAGCG-1	0.637592	8.21002
WT_CATTGTAAGCACGATT-1	-6.05482	-1.50289
WT_CATTGTAAGGACAACA-1	2.222	-0.242856
WT_CATTGTAAGTATTGGC-1	-5.60023	-2.44222
WT_CATTGTGCACAACCTA-1	-3.82698	-11.2497
WT_CCAAATCAGTAATCCA-1	1.39639	3.92613
WT_CCAACATAGTAACCCG-1	1.30206	-9.41517
WT_CCAACCAAGGACACTT-1	12.8162	5.19364
WT_CCAACCAAGTGATTCA-1	1.20734	7.03827
WT_CCAACCAAGTTCCCGT-1	-13.7036	-3.74399
WT_CCAATATCAAACGCGA-1	1.04317	9.0321
WT_CCAATATCAATGCCTA-1	-3.86385	-2.39246
WT_CCAATATCAATGCGCT-1	0.572042	1.03416
WT_CCAATATCATTGTGGC-1	1.20469	-9.41465
WT_CCACAATAGTGCTGTG-1	0.8619	-1.56553
WT_CCACACAAGGAACGGT-1	-4.15266	-11.1499
WT_CCACAGGGTGATCAGC-1	-4.09797	0.754718
WT_CCACATTGTTTAGTCC-1	-0.995739	-1.38644
WT_CCAGCCTGTGGATTCA-1	-1.86595	1.40319
WT_CCAGCTAAGTACTGGT-1	0.435281	6.00773
WT_CCAGCTGCAAGATTCT-1	12.9215	4.13515
WT_CCAGCTGCAGCAAATA-1	-3.00077	-3.42513
WT_CCAGGAACAGGCATGA-1	12.6719	3.79185
WT_CCAGGAACATGGCCTG-1	-3.53195	-10.685
WT_CCAGGAACATTGCGGT-1	-13.5574	-4.59073
WT_CCAGGATGTAGGTTTG-1	1.79508	-1.0856
WT_CCAGGATGTCGAAGTC-1	-0.479383	2.47111
WT_CCAGGATGTTATAGCG-1	7.30881	-0.534625
WT_CCAGGATGTTGGCGTG-1	5.77471	0.260079
WT_CCAGTTTGTACCAGGT-1	-4.66669	1.25976
WT_CCAGTTTGTCAATAGT-1	-8.61502	8.28998
WT_CCAGTTTGTTCCGGGA-1	-4.43013	-9.81823
WT_CCATAAATCACCATTT-1	1.67241	-9.03463
WT_CCATAAATCGTGCTAG-1	5.29584	-8.7702
WT_CCATAATCAATTAAGG-1	0.917241	4.28386
WT_CCATAATCAGAAACGT-1	9.32065	-3.29453
WT_CCATAATCATAATCCG-1	1.43713	4.05412
WT_CCATAGCCAATATAGG-1	7.5638	1.98654
WT_CCATAGCCACTATGGC-1	0.704595	1.41258
WT_CCATATTTCATTGCAA-1	-7.63918	8.25489
WT_CCATATTTCGTTTCCA-1	1.85703	-0.931676
WT_CCATCACTCCTTAATC-1	-1.98662	2.21224
WT_CCATCATGTACCGTTT-1	0.91107	8.57046
WT_CCATCATGTAGGTTGC-1	-7.39792	8.21055
WT_CCATCATGTTTGGTTC-1	6.84252	-1.06194
WT_CCATTGTGTGCGCATG-1	12.6371	4.84877
WT_CCATTGTGTTAGGCTA-1	-2.58074	1.82936
WT_CCCAAATAGCTCAAAC-1	6.94643	-1.00414
WT_CCCAAATAGGGACGCA-1	6.66907	2.42126
WT_CCCAAATAGTGTTGTA-1	2.3889	0.0801772
WT_CCCAACCGTCACGGAT-1	12.8556	4.45894
WT_CCCAGCACACCAACCG-1	1.2604	1.52606
WT_CCCAGTTTCAGAAACG-1	-3.78993	0.442969
WT_CCCAGTTTCCTTGCGT-1	1.78517	0.77793
WT_CCCATAACATTATGCG-1	-2.72516	3.20187
WT_CCCGCAACAGTTTCTC-1	9.44674	-3.44973
WT_CCCGCTTCAGGCGATA-1	12.6667	4.65355
WT_CCCGCTTCATAAAGCA-1	-3.6214	-10.7324
WT_CCCGCTTCATGAAGTA-1	-6.33793	0.495102
WT_CCCGTAAAGGGTGAAC-1	-0.135207	-1.41117
WT_CCCGTTGTCGAGGAGT-1	-4.73994	2.60427
WT_CCCTAATGTAAATTGC-1	-0.706609	2.06498
WT_CCCTAATGTAGCTAAT-1	-3.63484	-11.1805
WT_CCCTAATGTTGAAGCC-1	1.03994	7.99744
WT_CCCTAATGTTTGAGGC-1	0.855701	0.89838
WT_CCCTCACCACAAACTT-1	-1.59643	-2.88282
WT_CCCTCACCACAATGTT-1	-3.99637	-11.5781
WT_CCCTCAGTCCGCAAGC-1	4.33146	-8.49922
WT_CCCTGTTAGCATCCAG-1	12.8277	4.47302
WT_CCCTGTTAGGCATGAA-1	-3.13979	0.469507
WT_CCCTTAATCATCCTAT-1	0.61844	-2.46635
WT_CCCTTAATCGATAACC-1	0.878847	-7.87673
WT_CCGACAGGTCAATACG-1	1.69832	-0.0327877
WT_CCGACAGGTTGTTGGA-1	-4.68373	-10.2097
WT_CCGCAAATCTAAGGAG-1	-4.47791	-10.1047
WT_CCGCAAGGTACGATTG-1	-0.997026	-1.22613
WT_CCGCAAGGTTAAGTGT-1	-13.3503	-5.39308
WT_CCGCAAGGTTACATCC-1	-4.30114	0.378557
WT_CCGCCAACATCACAGC-1	4.61514	-8.6428
WT_CCGCTAAAGAATCTCA-1	0.731059	1.5145
WT_CCGCTAGCAAAGGCCA-1	-5.09264	1.21093
WT_CCGCTAGCAACTAGGG-1	8.63777	0.362335
WT_CCGCTAGCATGCTTAG-1	0.643668	1.5887
WT_CCGCTTAGTCCTTAGT-1	0.186483	1.76619
WT_CCGGTAGGTGTGAGAG-1	1.01084	7.33082
WT_CCGGTAGGTTTACGTC-1	1.40401	5.76954
WT_CCGTGCTGTCTAACCT-1	1.30029	7.91589
WT_CCGTGCTGTGATGATT-1	0.918891	-9.80634
WT_CCGTGCTGTGCTTACT-1	-3.82398	0.747724
WT_CCGTGCTGTTAACAGT-1	9.19784	-3.19954
WT_CCGTTACTCCGCAAGC-1	0.830966	6.07263
WT_CCGTTACTCGGCTATG-1	-5.05089	1.39579
WT_CCGTTACTCTTGCAGG-1	-6.06689	-2.42895
WT_CCGTTATGTCGAAGTC-1	-13.6582	-4.06222
WT_CCTAAAGGTACCGAAC-1	-4.17669	-10.3789
WT_CCTAAAGGTACGCGCA-1	6.10262	0.388388
WT_CCTAAAGGTTAAGCCA-1	1.94878	-1.10955
WT_CCTAAATCAGCTTAAT-1	-1.65102	1.12097
WT_CCTAAATCATAAGTTC-1	-4.28744	-10.1508
WT_CCTAAATCATGTCGCG-1	-5.674	2.58005
WT_CCTAAGGTCCTCAGCT-1	-0.236142	-1.11221
WT_CCTAAGGTCGTTTCCA-1	-4.90048	0.13829
WT_CCTAAGGTCTTGCAAA-1	9.67085	-0.7648
WT_CCTAATAAGGCATGAA-1	0.792684	7.24456
WT_CCTAATAAGGTGTCCA-1	1.01283	6.33728
WT_CCTAATCGTGGATTAT-1	-4.81174	1.05579
WT_CCTAATCGTTCACTGT-1	0.677888	6.45252
WT_CCTAATCGTTGCATCT-1	-0.116143	-1.01955
WT_CCTACTGGTTAAGCGC-1	-6.19733	1.24812
WT_CCTACTTCAAGTGAAC-1	7.33541	1.34709
WT_CCTACTTCACGTAATT-1	-13.8237	-2.91009
WT_CCTATTGTCAGCACCA-1	4.86335	-9.00815
WT_CCTATTGTCCCTGTTA-1	-3.5121	-10.7693
WT_CCTCAATGTACCGTTT-1	-9.86265	8.41614
WT_CCTCAATGTGGAAGGC-1	0.444967	-2.66236
WT_CCTCAGTTCACTCGCT-1	-13.8406	-3.60573
WT_CCTCCTCTCTTTAAGG-1	-6.31304	0.234622
WT_CCTGAATAGGAGCATA-1	1.86029	-0.575277
WT_CCTGACTTCAATAGCC-1	0.740376	6.69972
WT_CCTGACTTCAGGCCTA-1	9.82061	-0.825185
WT_CCTGACTTCATTATGG-1	-0.348753	5.82907
WT_CCTGACTTCGTTAGCG-1	0.646767	-7.2768
WT_CCTGAGTCACCCACAG-1	-13.468	-4.88116
WT_CCTGAGTCAGCCAGTT-1	9.00311	-0.225537
WT_CCTGAGTCATCACTTC-1	-2.15308	0.349493
WT_CCTGATGAGTAGAGGC-1	2.7338	-2.49888
WT_CCTGCTCCACGAACAG-1	-6.37904	0.478604
WT_CCTGCTCCAGCACGTT-1	0.0851984	-2.15222
WT_CCTGGATCAGCACGTT-1	-9.209	8.15852
WT_CCTGGATCATTGTGCA-1	6.62594	2.15896
WT_CCTGGTAAGGACCAGG-1	0.281394	3.13135
WT_CCTGGTAAGTTGTCTT-1	-1.32375	0.969145
WT_CCTGTAACAGTAATAG-1	4.50759	-8.46979
WT_CCTGTTGGTACTGAAT-1	-0.0760374	3.27439
WT_CCTGTTGGTAGTTGGC-1	-0.800173	-1.65609
WT_CCTTAACGTCCGTAGG-1	0.802487	-9.85584
WT_CCTTACTCAAGCGAGC-1	1.39109	1.55115
WT_CCTTAGTGTTTCGCCA-1	-7.10706	8.45071
WT_CCTTATGTCCCTCGCA-1	-3.69777	-10.9548
WT_CCTTATGTCTTGGACG-1	4.13501	-8.13985
WT_CCTTCAGGTGTGTCCC-1	-5.88903	-2.82146
WT_CCTTCAGGTTTACGTC-1	-2.00568	2.08348
WT_CCTTCGGTCAAGTGTC-1	-4.6172	1.2826
WT_CCTTCGGTCTCAATTC-1	0.49657	-7.16482
WT_CCTTCGTAGCAAACCT-1	7.77313	1.90577
WT_CCTTGCGTCTTCAATC-1	-0.901508	0.32967
WT_CCTTGTTCAGGTTAAA-1	4.78248	-8.63394
WT_CGAACCGGTATTGAGT-1	4.5832	-9.57915
WT_CGAAGAATCAGTTCCC-1	4.58768	-8.45367
WT_CGAAGAATCTTAAGTG-1	-6.05424	1.48671
WT_CGAAGCGAGGACGTAA-1	-0.148922	-1.22577
WT_CGAAGGCCACGAACAG-1	-3.80371	3.07364
WT_CGAAGTAAGCCAAATC-1	0.449499	-7.00971
WT_CGAATATGTCACAGAC-1	0.0807705	5.56974
WT_CGAATATGTTAAGCGC-1	-2.04734	1.24757
WT_CGAATCTAGGGCTAAA-1	-5.86844	-1.18441
WT_CGAATCTAGTAGCCAT-1	-2.86843	0.342238
WT_CGACAAGCACCTGTAA-1	0.85119	0.921088
WT_CGACCTGCAGCCTTGG-1	5.93422	-9.61107
WT_CGACCTGCAGTAGCCT-1	1.28738	-2.09485
WT_CGAGCGAAGCAGGCCT-1	4.89847	-9.6389
WT_CGAGCGAAGCCGGTAC-1	12.8748	5.50456
WT_CGAGCTGGTTAACAGT-1	0.149326	-2.46546
WT_CGAGGAAGTTATAGCG-1	-4.70283	-10.2571
WT_CGAGGTGAGGAGGTTA-1	7.51801	1.88376
WT_CGAGTCGGTAACAGGG-1	1.34349	-2.03452
WT_CGATGTCCATAAAGCA-1	1.0996	-9.2231
WT_CGATGTCCATAATGTC-1	0.829761	-1.44489
WT_CGATTATCAACACTTG-1	-4.76479	1.31633
WT_CGATTATCAATATGGA-1	-3.44519	-10.665
WT_CGATTATCACCTGTAA-1	-4.6928	2.34124
WT_CGATTATCATGCTTAG-1	-6.95984	8.20408
WT_CGATTGAGTACTTCAC-1	-3.93778	-11.1684
WT_CGATTGAGTGTTGCTT-1	-2.63741	1.53836
WT_CGATTTGCAAAGCTAA-1	1.73498	2.23023
WT_CGATTTGCAACAGCCT-1	1.2083	4.46651
WT_CGATTTGCAATTATGC-1	-0.146146	5.87381
WT_CGATTTGCAGTTTACG-1	-4.70964	3.3223
WT_CGCAAATTCAAACACC-1	-3.55238	0.658851
WT_CGCAAATTCTGCAACG-1	0.214011	6.49467
WT_CGCAATAGTAACCACA-1	-0.266659	2.33025
WT_CGCAATCCAGGAAGCC-1	-1.27027	2.40216
WT_CGCAATGTCTCGCCTG-1	-4.6846	-2.3549
WT_CGCAATTAGTAAGAAC-1	1.32327	7.8814
WT_CGCACAATCAAACCGT-1	-1.63019	-1.60274
WT_CGCACAATCATGCGTG-1	1.56781	8.89954
WT_CGCACAATCATGTCAA-1	-5.47408	-2.35732
WT_CGCACAATCGAAGCGG-1	-7.70189	8.64691
WT_CGCACAATCTGGCTTC-1	1.75539	1.01633
WT_CGCACACAGAAAGCAT-1	4.87402	-9.20962
WT_CGCACACAGGATCCGC-1	1.12857	8.48469
WT_CGCACACAGGTGTCCA-1	1.36849	-9.42494
WT_CGCACACAGTTAGTGC-1	-3.85965	-11.4552
WT_CGCACACAGTTCCCGT-1	-0.753506	2.02207
WT_CGCATATAGACACCGC-1	8.49284	-0.294835
WT_CGCATATAGCATCCAG-1	12.9046	4.72141
WT_CGCATGATCAAACACC-1	-4.13893	-11.0907
WT_CGCATTTGTACCGTTT-1	-0.154841	0.783344
WT_CGCATTTGTGATGATT-1	1.3629	6.45122
WT_CGCCAAATCAGGAAGC-1	1.34707	9.29062
WT_CGCCAAATCGCAACAT-1	-13.9319	-3.33515
WT_CGCCACACAGAACCGA-1	1.35169	4.15657
WT_CGCCTCATCCCGCCTA-1	4.30223	-8.58178
WT_CGCCTCATCTTACTCG-1	-2.42174	1.54291
WT_CGCGATTCAGCACCAT-1	-3.38098	-10.355
WT_CGCGATTCATAATCGT-1	0.0450245	5.77425
WT_CGCGATTCATATTGAC-1	-0.404622	0.740477
WT_CGCGGATTCCACCCTG-1	-2.14413	-1.9327
WT_CGCTAACCAGGCATCT-1	0.914158	-8.06091
WT_CGCTAATAGGCGAATA-1	-8.90779	8.39327
WT_CGCTACTTCCCTCGCA-1	1.53049	8.76019
WT_CGCTATGAGCCTGATG-1	-8.1057	8.43095
WT_CGCTCAGCAGTTTACG-1	-4.54898	0.395891
WT_CGCTCAGCATAAGGAC-1	2.33293	-2.31344
WT_CGCTCCATCAGGAACA-1	1.02623	9.28516
WT_CGCTGTGCAGAGGGAG-1	-0.629952	-2.58434
WT_CGCTTAACAAAGCTAA-1	-3.87007	0.972004
WT_CGCTTAACACAAACTT-1	0.648944	6.57912
WT_CGCTTACTCCACCCTG-1	-2.27074	-0.0679619
WT_CGCTTCTAGCATGGTT-1	4.76881	-9.32718
WT_CGCTTCTAGGCAGGTG-1	0.493621	8.50809
WT_CGCTTGCGTCCTCCAA-1	-5.98428	-2.05021
WT_CGCTTGCGTGGTTCTT-1	-4.03664	3.17267
WT_CGGAATCGTAGGTTGC-1	1.18189	-9.04085
WT_CGGAATCGTCCGCTGT-1	4.68619	-9.02499
WT_CGGACCTAGTTAGCTA-1	0.471746	-7.14519
WT_CGGAGCAAGAATCGCT-1	7.32992	2.19093
WT_CGGAGCAAGGAAGCAC-1	-3.84564	3.17307
WT_CGGAGTCTCAATGTCA-1	-4.0177	-11.1523
WT_CGGATAAAGCACAGAA-1	0.780844	-7.66639
WT_CGGATTAGTAACTACG-1	9.21604	-3.2676
WT_CGGATTAGTGCTCCGT-1	0.981826	-2.4143
WT_CGGATTAGTTAGGATT-1	7.7455	1.45504
WT_CGGATTAGTTTAAAGC-1	13.138	4.85034
WT_CGGCAATGTGAGACTC-1	5.14197	-9.36007
WT_CGGCCATAGACAAAGT-1	1.26475	8.97723
WT_CGGCCATAGTATTGTG-1	0.484311	6.84869
WT_CGGCTAATCGCAGGCT-1	11.2127	-0.548429
WT_CGGCTAATCGGTCAGC-1	-13.8058	-3.72579
WT_CGGCTCACAATCATGT-1	-1.24105	-1.83431
WT_CGGGCTTAGAGCAAGC-1	-2.57685	3.4458
WT_CGGGCTTAGGAACCGG-1	0.746483	-1.62629
WT_CGGGTATGTCAGTAAT-1	-9.35699	8.47629
WT_CGGGTATGTGTTAAAC-1	5.59115	-10.2355
WT_CGGGTATGTGTTTGTC-1	-0.977404	-1.36218
WT_CGGTAACGTGGGTGAA-1	-8.38413	8.40766
WT_CGGTAACGTTTATGGG-1	2.11794	-1.85224
WT_CGGTGAACAATTAGGA-1	-3.14286	-1.66585
WT_CGGTGAACAGGCTAAG-1	7.12143	1.60938
WT_CGGTGAGAGACAAACG-1	0.91701	-1.4884
WT_CGGTGAGAGGACCTGC-1	11.9327	5.36361
WT_CGGTTATAGGGATGCG-1	-4.08239	-11.0759
WT_CGGTTGGGTCAAACTG-1	-3.20278	-1.60976
WT_CGGTTGGGTTCCATTA-1	-8.5871	8.35816
WT_CGGTTTCTCGTTATCT-1	12.8846	4.48941
WT_CGGTTTGAGTAACCAC-1	-7.40959	8.47342
WT_CGTAACTAGCACAGAA-1	7.51676	1.9469
WT_CGTAATGGTTGAATCG-1	-7.34356	8.20422
WT_CGTAATGGTTTGGCTT-1	-2.99181	-1.69465
WT_CGTACGGGTTCAAGAT-1	1.88782	0.0388657
WT_CGTAGCGGTAGTAAGA-1	-1.86583	3.16249
WT_CGTAGCGGTCATGCCC-1	1.43328	9.24565
WT_CGTAGCGGTTACAAAC-1	1.30107	8.15646
WT_CGTAGCGGTTCCAGGG-1	-0.267664	4.76673
WT_CGTATTGCACCGGCTA-1	1.65503	2.71808
WT_CGTCATTGTGTTTGCT-1	-8.26014	8.56351
WT_CGTCCTAGTTATTGCC-1	0.693561	-2.77516
WT_CGTGAGGAGCTAAAGG-1	1.17175	-9.03623
WT_CGTGAGGAGGCTAAGA-1	10.4191	-0.821411
WT_CGTGCACAGTGTTGTA-1	6.17588	-9.94122
WT_CGTGCTGCAACAACAA-1	1.6667	2.66814
WT_CGTGCTGCAATGCCCG-1	1.15526	5.93242
WT_CGTGCTGCATGACTAT-1	1.11403	-9.12612
WT_CGTGGTTCAAGGTACG-1	5.82163	-10.6273
WT_CGTGGTTCAATAACGA-1	-2.74345	-3.20996
WT_CGTGTTACAAGGTCGA-1	6.42364	-10.8891
WT_CGTGTTACACATTAAC-1	6.33097	-10.0639
WT_CGTTAAATCGTGCTAG-1	0.0142556	0.985499
WT_CGTTAACAGTCTCACC-1	0.80749	-2.70082
WT_CGTTAGTAGTCATTAG-1	10.8099	-0.605908
WT_CGTTATCGTTGGTGAC-1	8.75473	0.353758
WT_CGTTGCGCAACTAACT-1	1.50687	-8.87777
WT_CGTTTCTCAACTCGCG-1	7.40202	1.17869
WT_CGTTTCTCATGTCAGC-1	0.389304	2.35959
WT_CGTTTGGAGCATGACT-1	6.62241	1.37456
WT_CGTTTGTGTATCTGGA-1	-3.80211	-11.0984
WT_CGTTTGTGTGAAGCCT-1	6.05826	0.370972
WT_CTAAAGCTCAAACTCA-1	-3.67337	-11.2261
WT_CTAAAGCTCAAGCGCC-1	1.49209	1.18768
WT_CTAAAGCTCCACCCTG-1	-7.83387	8.55661
WT_CTAAATGTCGGTAACT-1	-10.0278	8.46621
WT_CTAACCCTCTTGTCTG-1	0.224417	8.1974
WT_CTAAGGTTCATCCTAT-1	-5.37134	2.89143
WT_CTAAGGTTCCTTAGGG-1	7.54388	2.38247
WT_CTAAGGTTCGTTAGCG-1	-9.75477	8.30488
WT_CTAAGGTTCTCAATTC-1	6.8816	2.39369
WT_CTAAGTCAGAGGCTAA-1	-1.84797	0.42609
WT_CTAAGTCAGGGTCCAC-1	13.1109	5.10638
WT_CTAATAGTCTTTGACT-1	12.6166	3.7994
WT_CTAATCCGTTATGTGG-1	4.49252	-8.66139
WT_CTAATCGCACTGACCG-1	-1.94863	0.151908
WT_CTAATCGCATTGCGTA-1	-2.48327	2.19645
WT_CTAATGTCAGGCAAGC-1	-3.72936	-11.197
WT_CTAATGTCAGGCTGTT-1	1.75559	-9.38616
WT_CTAATTGAGCTAATCA-1	0.584427	2.81901
WT_CTAATTGAGCTTGCTC-1	-7.75406	8.2813
WT_CTAATTGAGTGATTCA-1	1.57282	-1.77526
WT_CTACAACAGCTAGAAG-1	-4.24144	-2.76203
WT_CTACAACAGGGCTTAT-1	-1.88909	1.54432
WT_CTACAACAGTACCGCA-1	-4.81875	1.02894
WT_CTACCGGCAATAAGCA-1	-9.41262	8.38372
WT_CTACCGGCAATATACC-1	0.661904	-2.52706
WT_CTACCGGCACAAAGCG-1	-4.02599	-11.418
WT_CTACGAAGTATTGAGT-1	-2.78816	2.96396
WT_CTACGAAGTCGTTACT-1	-4.1294	-2.11711
WT_CTACTAAAGCAATAGG-1	11.9097	-0.177299
WT_CTACTAAAGCTTTGTT-1	12.7641	4.60516
WT_CTAGATTCAATGAAGC-1	-4.24827	-11.1489
WT_CTAGATTCAGGCTACT-1	6.91545	0.657196
WT_CTAGCTTGTGCTGTAA-1	10.8522	-0.65797
WT_CTAGGACGTACCAGGT-1	-7.87274	7.87802
WT_CTAGGACGTCAATACG-1	-0.966686	2.09601
WT_CTAGGCGGTACGGTAC-1	-13.442	-4.03074
WT_CTAGTAGGTCCCGAAG-1	0.602044	-2.2687
WT_CTAGTAGGTTAGCCAA-1	-2.54697	-1.62457
WT_CTAGTAGGTTGCGTAA-1	-5.80094	-2.1805
WT_CTAGTAGGTTGTTCAC-1	0.752019	-2.70933
WT_CTAGTTGCAATTGCGC-1	5.29093	-7.75201
WT_CTAGTTGCACTAAATC-1	0.101614	5.95115
WT_CTATAACCAATCCTAG-1	-4.38976	-3.03508
WT_CTATAACCACCGTTCC-1	-6.09274	-1.42385
WT_CTATGACAGAAAGGAA-1	12.7792	5.60362
WT_CTATGAGGTGGTGAGA-1	-6.81293	8.0957
WT_CTATGAGGTTAGGATT-1	-0.547994	-1.30136
WT_CTATGAGGTTATAGCG-1	1.66375	1.8642
WT_CTATGATCAAGCCACT-1	-5.08486	3.00429
WT_CTATGATCAAGTAAGC-1	-4.64215	3.16708
WT_CTATGATCAATTGACT-1	7.06555	1.38152
WT_CTATGGCCAGAGAGCC-1	-3.54055	-11.1329
WT_CTATGGCCAGGCTTGT-1	-13.6892	-2.80093
WT_CTATGTTTCATTAGCA-1	-3.69305	-11.3743
WT_CTATGTTTCGTTAACA-1	-0.494663	-1.75005
WT_CTATTACTCTTGTTCG-1	-1.93864	0.44717
WT_CTATTCAGTCATCAAG-1	-4.17165	-3.02589
WT_CTATTCAGTTAGGTTG-1	-3.269	0.0952223
WT_CTATTGAAGCAAGGGT-1	1.7363	1.83635
WT_CTATTGAAGCAATAGG-1	9.26153	-3.26707
WT_CTCAATAAGCTTCTCA-1	-2.05882	0.0344004
WT_CTCACAACAAACTCAT-1	1.14027	1.57346
WT_CTCACACTCCGCACAA-1	-4.43762	0.930719
WT_CTCACTCAGCCTGAGC-1	1.16861	-9.53179
WT_CTCAGGATCAAGTGAG-1	1.20688	4.62822
WT_CTCATCATCACTCGCT-1	2.19971	-2.29955
WT_CTCATCATCTTAGCCC-1	-3.39875	-10.4514
WT_CTCATGACACATACTG-1	-3.87142	-11.3422
WT_CTCATGCTCCGGGACT-1	-4.7793	1.47993
WT_CTCATGCTCCTAAGAC-1	0.978093	-9.8081
WT_CTCATTAGTGACATGC-1	-2.30198	-1.89787
WT_CTCATTAGTTGGTTGA-1	-0.827485	-0.581006
WT_CTCATTAGTTTGCGCC-1	2.21212	-1.03443
WT_CTCATTTAGAAACTGG-1	12.1326	-0.0319342
WT_CTCATTTAGGATTGAG-1	-0.485657	0.686556
WT_CTCATTTAGGTGCGGA-1	11.7716	5.33783
WT_CTCCAAACACCGGTAT-1	7.71721	1.0823
WT_CTCCAAACAGCAAGTG-1	-10.3424	8.64382
WT_CTCCAAACATCATGGC-1	-4.53569	0.484872
WT_CTCCAACTCAACCAAC-1	10.846	-1.01164
WT_CTCCAACTCCAAATCA-1	-0.282428	-2.13542
WT_CTCCATCAGATGGACA-1	1.42017	3.78324
WT_CTCCATCAGTAAAGGT-1	-4.46591	-10.2588
WT_CTCCCTGAGGAAGTAT-1	2.44922	-2.90067
WT_CTCCGGACAGGCTAGA-1	7.10867	-0.618523
WT_CTCCGTCCACGGTACT-1	-0.741945	0.674486
WT_CTCCGTCCACTTCACT-1	-5.84791	-2.57421
WT_CTCCGTCCAGATTCAT-1	-3.89	-11.1202
WT_CTCCGTCCAGTTTGGC-1	4.63267	-8.47705
WT_CTCCTCACAAGGTATA-1	1.8223	1.73605
WT_CTCCTGAGTTTGGGCG-1	-4.65774	-10.2071
WT_CTCGACAAGGTATTGC-1	-4.29873	-3.11335
WT_CTCGCTAGTCATAAGT-1	-3.71015	-10.7005
WT_CTCGCTAGTCCAAATG-1	-0.425312	6.44464
WT_CTCGTTATCAATGTCA-1	-3.07769	2.89773
WT_CTCTAAGCAATGCCCG-1	-4.99255	2.39678
WT_CTCTAAGCACGGTACT-1	-4.68552	3.19101
WT_CTCTATGTCAAAGGCA-1	-3.25457	-2.2494
WT_CTCTCACAGGGATTAG-1	-1.62221	0.0467603
WT_CTCTGTTCAATAAGCA-1	10.7108	-1.05263
WT_CTCTGTTCAGTTAAAG-1	-0.159104	5.43814
WT_CTCTGTTCATCCCTCA-1	0.652638	1.03016
WT_CTCTTGATCCACCTTA-1	0.77042	1.07686
WT_CTGAATATCCAGGTTG-1	0.525789	8.70971
WT_CTGAATATCGATTTGA-1	11.5103	-0.331414
WT_CTGACATAGCCTTAAA-1	0.104146	0.920304
WT_CTGATCACAGGATGGC-1	-1.25127	2.43723
WT_CTGCAATAGTAGGATG-1	1.34535	1.7005
WT_CTGCTACTCCGTCCAT-1	-2.6734	-2.57906
WT_CTGCTACTCGGGACTC-1	7.81821	2.30957
WT_CTGCTATGTTGTCATC-1	1.04322	-2.2383
WT_CTGCTCCCAACAGGTG-1	0.613647	-2.50889
WT_CTGGACCAGACAAAGT-1	-2.63036	3.19556
WT_CTGGACCAGGGTTAGA-1	12.926	4.83427
WT_CTGGACCAGTAGAGGC-1	-13.7399	-3.02783
WT_CTGGATGTCCTAACGG-1	-4.50125	1.69556
WT_CTGGCTAAGACTAAGG-1	5.7781	-9.47826
WT_CTGGCTAAGCACAGGG-1	0.946792	-8.03805
WT_CTGGCTAAGGGATGAC-1	-1.79287	2.07455
WT_CTGGCTAAGGTGAAAT-1	-1.22676	0.84252
WT_CTGGCTAAGTAACGGA-1	0.209341	6.46807
WT_CTGGCTTTCCGCCTCA-1	9.46246	-3.48731
WT_CTGGTCAAGTCGCAAT-1	-3.96189	-10.9368
WT_CTGGTCAAGTTTCCTG-1	1.71557	1.74333
WT_CTGTACCTCACGCATG-1	1.19818	4.48938
WT_CTGTGTGAGTCGCAAT-1	12.7551	4.84831
WT_CTGTGTGAGTTAGGCT-1	5.88459	-9.30517
WT_CTGTTAAAGCATTATG-1	-2.22811	1.26477
WT_CTGTTGGAGAGAGGCT-1	6.99956	1.9357
WT_CTGTTGGAGGGATGAC-1	-5.09784	1.46047
WT_CTTAACAAGCTCCCTG-1	-3.88292	3.1779
WT_CTTAAGATCTTGAGGT-1	-1.45202	-0.69784
WT_CTTAATGAGACAACAG-1	-0.43521	2.27249
WT_CTTACCGGTTAGCAGC-1	0.540744	1.28022
WT_CTTACCTCACCTATAG-1	1.27312	0.443031
WT_CTTACTAGTGAGGTAG-1	12.0378	-0.270533
WT_CTTAGGAGTTAATCGG-1	-13.5211	-4.87621
WT_CTTAGGAGTTAGGACC-1	-4.30844	-11.2264
WT_CTTAGTTTCCTGTTCA-1	4.68137	-8.55999
WT_CTTAGTTTCGCTCCAT-1	-0.0776545	-2.25269
WT_CTTAGTTTCGGCTAGC-1	-0.216611	1.95418
WT_CTTATTGGTTCCGGCT-1	8.60867	-0.183623
WT_CTTATTGGTTCCGGGA-1	0.340742	6.54947
WT_CTTATTGGTTGCACGG-1	-2.09962	0.0567754
WT_CTTCAAGCAAGGCCAA-1	5.15173	-8.84185
WT_CTTCAATTCTTAGGGT-1	8.75743	0.314216
WT_CTTCACTCACAACAAA-1	10.7089	-0.807813
WT_CTTCACTCACAGGATG-1	5.03016	-8.65713
WT_CTTCACTCAGCCTTGG-1	-7.63088	8.48227
WT_CTTCACTCAGGATTAA-1	-5.29665	2.85765
WT_CTTCAGGAGTTCCTCA-1	13.101	5.60805
WT_CTTCGCGTCCGCAAAT-1	-3.52729	-2.50068
WT_CTTCGCGTCTGTAATG-1	0.654472	1.22514
WT_CTTCTAAGTGATGAAA-1	-13.5183	-4.06907
WT_CTTCTAAGTGTTAGCA-1	2.31423	-2.86943
WT_CTTCTCAAGCTGTAAC-1	-3.55063	-11.3729
WT_CTTCTCAAGGACTAAG-1	-3.29429	-1.68835
WT_CTTCTCAAGGGCCACT-1	-2.63744	-2.54987
WT_CTTGAACAGCTCCTAC-1	-2.75113	-1.72449
WT_CTTGAATCAAGGAATC-1	-3.87803	3.17494
WT_CTTGACGAGTGGACAA-1	-1.03014	2.37952
WT_CTTGCAACAATAATGG-1	-0.0550104	4.69469
WT_CTTGCAACATCACAGC-1	12.6458	4.70423
WT_CTTGCGCGTAGCTGGT-1	10.3804	-0.692709
WT_CTTGCGCGTTCACTGT-1	-4.3633	-10.3711
WT_CTTGCTCAGACTTACA-1	7.29937	1.10655
WT_CTTGCTCAGCCACATG-1	-2.34486	-0.193464
WT_CTTGTTCCAAAGCTCC-1	-3.76293	-11.2046
WT_CTTGTTTAGCCTTAAA-1	12.6492	4.73209
WT_CTTGTTTAGGTTACAC-1	-5.067	-0.00159011
WT_CTTTAGGCAGGCTAAG-1	-2.4069	1.63517
WT_CTTTAGTTCTTGCAAA-1	-0.0123014	5.97315
WT_CTTTATCAGCACTAGT-1	1.24102	-9.53409
WT_CTTTATCAGTAGAGGC-1	-6.27174	-0.485614
WT_CTTTATGGTCTAGCTT-1	7.6633	1.04334
WT_CTTTCTTGTAAGGTTT-1	-0.104201	0.692596
WT_CTTTCTTGTTAGAGCC-1	-5.34055	2.86986
WT_CTTTGAGCAACTAGGG-1	2.36135	-0.105674
WT_CTTTGGTGTAAATTGC-1	-2.88828	-1.97008
WT_CTTTGGTGTACCCACC-1	-1.84035	0.0211487
WT_CTTTGTCCAGATAGAC-1	5.41207	-8.99347
WT_CTTTGTCCAGGAATCG-1	-8.72744	8.33555
WT_CTTTGTCCATTGTCAG-1	2.04	-0.741349
WT_GAAACTGAGGATTGCT-1	-2.36223	-0.129431
WT_GAAAGCCAGATTGAGG-1	-0.898633	1.06144
WT_GAAAGCCAGGCGCATC-1	-6.56775	7.98368
WT_GAAAGCCAGGTAGCTT-1	-13.6032	-3.84013
WT_GAAAGGCTCAAAGGCA-1	-3.03985	2.05482
WT_GAAAGGCTCATTGCAA-1	-6.55019	8.20498
WT_GAACCAAAGTCACCAG-1	2.47749	-2.9054
WT_GAACCAAAGTCACTAA-1	-2.00658	-0.59824
WT_GAACCGCTCATGCTTT-1	-4.31156	-10.4462
WT_GAACCTTAGCCAGTAT-1	-2.47301	1.96881
WT_GAAGCCTGTCGCAATA-1	1.34946	4.22926
WT_GAAGCCTGTGCATCGG-1	-3.46208	-1.73631
WT_GAAGCCTGTTGTTGCT-1	1.44414	1.16875
WT_GAAGCTAAGTAGAGGC-1	-1.1866	-2.96504
WT_GAAGGAACAACTGGCT-1	0.84805	-1.30558
WT_GAAGGAACAGGCAAGC-1	-3.21878	2.51977
WT_GAAGGATGTCCGTAGG-1	-3.93877	3.18357
WT_GAAGGCCCACACAATT-1	12.5638	4.79502
WT_GAAGGCCCAGGCTGTT-1	12.7175	5.34467
WT_GAAGGCTAGTTCCTGC-1	-4.6206	1.7742
WT_GAAGTAAGTCTCAGCC-1	-4.92891	2.03938
WT_GAAGTAAGTTTACGTC-1	-6.0673	-1.76918
WT_GAAGTATAGCGAGGTG-1	2.35044	-0.691771
WT_GAATTTGTCATAACCA-1	-3.85433	-2.68872
WT_GACAATACAAGTTATC-1	5.93172	0.432967
WT_GACAATACACCTAATG-1	-4.33005	-10.1277
WT_GACAATACATCAGTAT-1	-3.87709	-0.363051
WT_GACACCGGTCGCGCAA-1	-0.799734	0.599567
WT_GACACCGGTTAACGAT-1	-5.73076	-2.50564
WT_GACACTAGTACAATGT-1	-3.52378	-10.9362
WT_GACACTAGTACGCGCA-1	8.70946	0.254561
WT_GACACTAGTCGACTAA-1	-4.93084	1.15314
WT_GACATAGAGGTGCTGC-1	0.00554576	3.83018
WT_GACATTATCAGTTCCC-1	1.09845	1.66373
WT_GACATTATCCCTTGCG-1	-3.53575	0.77685
WT_GACATTATCCTCCTAA-1	-0.11938	-1.90599
WT_GACCGAACAAGGACCA-1	1.09472	-9.5121
WT_GACCGTTCAAGACTCC-1	5.24327	-9.15515
WT_GACCGTTCAAGCTACC-1	1.18279	-9.13944
WT_GACCTAAGTAATCGTG-1	-9.93662	8.61961
WT_GACCTAGTCAATGAGG-1	-13.7607	-3.82622
WT_GACCTAGTCGCTAGAT-1	1.3381	-9.00729
WT_GACCTGATCATCCTAT-1	0.399156	2.54798
WT_GACCTGCAGCGTGCAC-1	1.74849	-0.349867
WT_GACCTGCAGTATTGGC-1	-4.20491	-10.8243
WT_GACCTTTGTCCGTAGG-1	1.07784	1.18216
WT_GACGCAACAGGAATCG-1	5.65472	-9.11936
WT_GACGCCTAGCTCGCTT-1	11.6947	5.21219
WT_GACGCCTAGGAAACTG-1	-7.76445	8.08838
WT_GACGCCTAGTGAGGTA-1	0.974221	-1.96148
WT_GACGTAAAGATACTTG-1	1.84704	-1.25163
WT_GACTAATGTAGCTAAT-1	-4.04397	-2.88671
WT_GACTAATGTAGGTTGC-1	1.10701	9.03425
WT_GACTTAGGTATTGGTG-1	11.7375	0.0731928
WT_GACTTAGGTGTTTGTC-1	-0.194166	-1.86443
WT_GAGAAACGTAATCGCA-1	-0.331052	-2.19306
WT_GAGAGGCGTCATGAGC-1	6.8878	-0.677535
WT_GAGCAAATCATTGCAA-1	-3.51879	-10.565
WT_GAGCAAATCGGTTAGT-1	0.792136	1.87647
WT_GAGCATGCAACTAGGG-1	-0.0506282	4.66649
WT_GAGCCACTCAATTACG-1	5.13335	-10.0624
WT_GAGCCTTCATGCTATG-1	-3.47549	-11.0524
WT_GAGCGAAGTCGTTATC-1	2.6595	-2.51953
WT_GAGCGATAGTAACTCA-1	-0.618684	-1.89099
WT_GAGCGGTCAGGCCATT-1	-9.59439	8.1265
WT_GAGCTGCTCTAACCTT-1	1.13637	-9.0284
WT_GAGGACTAGTGCACGC-1	-5.14716	2.95576
WT_GAGGACTAGTGGCGGA-1	-1.06882	-1.88977
WT_GAGGAGGCAAGCGATG-1	2.56729	-0.677401
WT_GAGGCTACATCTTGAG-1	0.837921	-1.56498
WT_GAGGCTACATTGTGGC-1	-0.928479	1.11262
WT_GAGGGAGCAAGTGTCC-1	0.699133	3.47736
WT_GAGGGAGCACTAAATC-1	-2.68815	-1.64268
WT_GAGGGAGCAGGTTCAC-1	-4.81528	1.11951
WT_GAGGTACAGACTATTG-1	-4.28624	0.598241
WT_GAGGTGAGTTACAAAC-1	-4.52643	2.51402
WT_GAGGTTAAGTCACCTC-1	0.206884	4.83183
WT_GAGTAATAGGCGGGTA-1	2.53681	-0.231586
WT_GAGTCAAAGCACGTTG-1	-9.76198	8.23408
WT_GAGTCAAAGCGGGCAA-1	1.15161	5.13393
WT_GAGTCAAAGCTGTCAG-1	-1.9908	0.356015
WT_GAGTCAAAGGAACACA-1	1.27801	-2.06718
WT_GAGTCATTCGCTAAAC-1	-2.38205	0.424563
WT_GAGTTACTCCTGGTGA-1	-4.44106	-10.1888
WT_GAGTTGCGTGGCTTCC-1	0.520359	-10.1253
WT_GAGTTGCGTGTCCAGG-1	-0.158093	-1.93326
WT_GAGTTTGGTAAGGTTT-1	-0.275042	5.38463
WT_GAGTTTGGTCGAAGTC-1	5.87786	-9.15183
WT_GAGTTTGGTGAGCACT-1	2.6238	-2.45884
WT_GAGTTTGGTTGTCATC-1	0.411925	-7.09215
WT_GATAAAGGTCCGCTGT-1	-4.95652	2.14458
WT_GATAACGAGACTTATG-1	-2.73367	2.15469
WT_GATAACGAGTTAGACC-1	12.8543	4.96471
WT_GATAATCGTTGGCCGA-1	-4.99168	-0.141361
WT_GATAGACCATGTCGCG-1	5.83691	-9.76283
WT_GATCAAGAGCTTAGCG-1	-0.251594	-1.94829
WT_GATCACTAGGATTTGC-1	-2.55339	2.38248
WT_GATCAGGCAATCTCTC-1	-6.29874	0.588183
WT_GATCAGGCAGTAGGTG-1	-4.58479	1.60722
WT_GATCAGTTCACCTGTC-1	0.913885	-2.41722
WT_GATCAGTTCTTAGGAC-1	-4.74278	1.17367
WT_GATCCGTCAAACAACA-1	-7.66468	8.39152
WT_GATCGAGCACAGAACG-1	-4.09663	-11.0628
WT_GATCGAGCATGGAGGC-1	0.562626	5.36075
WT_GATCGATTCGCTTGCT-1	-7.35665	8.23179
WT_GATGACTTCATGCTAA-1	1.67555	1.84494
WT_GATGACTTCTCAATTC-1	2.02601	-0.821481
WT_GATGAGGGTATGGTGC-1	0.72308	3.93023
WT_GATGCATTCCTGGTGA-1	-4.29857	-10.2642
WT_GATGCATTCGGGATTT-1	-8.13857	8.7449
WT_GATGCGACACCTAAGC-1	-7.47262	8.07436
WT_GATGGCTGTAAACAAG-1	0.211977	0.0939083
WT_GATGGCTGTAACCAGC-1	-4.46272	-2.08673
WT_GATGGCTGTACGGGTT-1	5.35875	-9.29259
WT_GATTAAGCAATAGCCC-1	7.69167	1.48605
WT_GATTACTCATTATGAC-1	-4.36701	-3.07108
WT_GATTAGCTCCACCTTA-1	-3.61661	-11.1125
WT_GATTAGCTCGGTAACT-1	-4.6581	-10.3149
WT_GATTAGTGTCAAACTG-1	5.26516	-9.10289
WT_GATTCAATCCTCAGTC-1	0.521682	6.73841
WT_GATTCAATCCTTTACG-1	2.23999	-1.29179
WT_GATTCAGGTAAGTCGC-1	0.723204	-2.79594
WT_GATTCATCAACTAGAA-1	0.799261	-2.57117
WT_GATTCATCAGCAAGAT-1	1.4658	1.37431
WT_GATTGCAGTGTTTGAG-1	-5.09985	1.95568
WT_GATTGCAGTTGCGCGA-1	-1.708	2.29849
WT_GATTGTTCAGTACCGT-1	0.968073	8.9465
WT_GATTTGCAGGTACCGC-1	-3.55005	-10.8945
WT_GCAAACAAGGCATGTT-1	1.13108	8.25451
WT_GCAAACCGTAACCAGC-1	-3.64972	-11.4577
WT_GCAACAGCAAGCTTTG-1	-3.49846	0.500794
WT_GCAAGCCTCATCCACC-1	-3.49407	-3.0225
WT_GCAAGCCTCCCTCAAC-1	-0.820308	1.68635
WT_GCAAGCCTCCTTGCGT-1	-0.347116	-1.98146
WT_GCAAGTGCACAATGTT-1	-1.9572	0.912633
WT_GCAATAGAGGAGGACT-1	1.46688	2.00281
WT_GCAATATGTTGTTGTC-1	-1.11125	-0.290885
WT_GCAATCTAGGACCTTG-1	-2.32051	-2.1846
WT_GCAATGAAGGAGGTTA-1	-9.83445	8.36011
WT_GCAATGTTCCAAGTTA-1	0.541615	6.33611
WT_GCAATGTTCTTGGACG-1	0.899254	7.47533
WT_GCACATTAGGAGCACG-1	-3.04816	-1.86396
WT_GCACATTAGTAATCCA-1	1.9211	-0.492945
WT_GCACTAAGTGTCACGG-1	0.724772	-7.42286
WT_GCACTTACAGCCGCTA-1	-0.0697564	-1.09644
WT_GCAGCCAGTTGAGCCG-1	1.51458	5.63172
WT_GCAGGAAGTGACATAT-1	1.67758	8.96064
WT_GCAGGATAGTCAGGCC-1	-0.424289	-1.88623
WT_GCAGGCAAGAGCCGGA-1	0.858242	-2.56907
WT_GCAGGCAAGTTACCGG-1	-6.69184	8.35357
WT_GCAGGCAAGTTAGTTG-1	-1.26959	-1.71976
WT_GCAGGCAAGTTCCCAC-1	9.5321	-3.58011
WT_GCAGGCTTCCGGCTAA-1	-5.31176	2.90021
WT_GCAGGCTTCGATTCTT-1	4.04587	-9.09602
WT_GCAGGTGAGCATGCAT-1	-1.07428	1.30778
WT_GCAGGTGAGCATTTCT-1	-3.07918	2.30132
WT_GCAGGTGAGCCTGACA-1	-1.8196	1.57625
WT_GCATATATCTAATCAG-1	0.408321	2.28184
WT_GCATATATCTCGCCCA-1	-4.67623	-0.0047224
WT_GCATCCTTCACAAGCT-1	8.32157	0.224922
WT_GCATCCTTCGCGACAC-1	-0.544905	2.18375
WT_GCATGAGCAATAACCT-1	-2.6145	1.61788
WT_GCATTGCCAGCATGGA-1	1.08184	4.79861
WT_GCATTGCCATTGTGCA-1	-3.76836	0.858423
WT_GCCAACATCGCTAGTG-1	-4.4572	1.33584
WT_GCCAATAGTGTGAGAG-1	-3.9534	-2.28974
WT_GCCAATTAGATAACCC-1	-4.64721	-2.41876
WT_GCCAATTAGCGCTAAT-1	-2.48968	-3.05813
WT_GCCAATTAGTATTGCA-1	-2.74504	-0.90844
WT_GCCACAATCAGGATGA-1	-3.64094	-11.2249
WT_GCCACAATCATGTTTC-1	-3.9192	-11.4465
WT_GCCACACAGCCACATG-1	-4.02119	0.889451
WT_GCCACACAGGGCTTTG-1	1.54058	-1.87824
WT_GCCACACAGTGAGAGC-1	1.53239	-1.95059
WT_GCCACTAAGGGCCATC-1	-13.6097	-4.47595
WT_GCCACTAAGTGAGCAA-1	-4.02756	-11.5369
WT_GCCATGATCCCGTTTA-1	7.06095	1.04986
WT_GCCATGATCCTGGTCT-1	1.4958	1.67136
WT_GCCATGATCTAACCTT-1	13.0157	4.53272
WT_GCCATGATCTAAGTGC-1	-13.5051	-4.46121
WT_GCCATTACATCCTGAA-1	-7.93939	8.03479
WT_GCCCAAATCCTAAGAC-1	8.13422	1.79862
WT_GCCCAAATCTTGCAGG-1	-4.79538	0.199774
WT_GCCCGTTGTAACCAGC-1	0.847292	-1.53179
WT_GCCCTCATCCCAGTAG-1	0.635559	-2.64465
WT_GCCGTGAGTAGCTAGC-1	-0.354014	-2.17966
WT_GCCGTGAGTGTGTGGT-1	7.48119	1.41373
WT_GCCTACTTCCTCCATA-1	0.859523	-7.79209
WT_GCCTACTTCTAATCTC-1	-1.06188	1.53241
WT_GCCTATTGTCAACAAT-1	-4.65356	0.44506
WT_GCCTATTGTGGGAACA-1	6.06832	-9.4279
WT_GCCTATTGTTAACGGC-1	4.92827	-9.59338
WT_GCCTCAAAGTTACCGG-1	0.471694	8.86854
WT_GCCTCAAAGTTGTCAA-1	-1.67731	0.871945
WT_GCCTCGACAGCAACAG-1	-3.62598	-11.349
WT_GCCTGACAGTAGGATG-1	-3.1518	2.86719
WT_GCCTGAGGTTGGTGAC-1	7.67335	1.68077
WT_GCCTGCTGTCTAACCT-1	0.900815	4.20174
WT_GCCTGTGCACAACCTA-1	0.153457	-1.62814
WT_GCCTTAACAGGCCATT-1	-0.806076	1.87055
WT_GCCTTACTCAATCATG-1	0.818841	-9.91177
WT_GCCTTAGAGCATTTCT-1	0.65868	-1.65374
WT_GCCTTAGAGTAGCTTA-1	0.8899	5.97711
WT_GCCTTGCGTAGGATCC-1	0.866801	8.55874
WT_GCCTTTATCATGTTTC-1	1.26715	-9.53335
WT_GCCTTTGGTGAGCGAA-1	-5.92975	0.728684
WT_GCGAAGTAGACTAAGG-1	-3.51582	0.469113
WT_GCGAAGTAGGTCCACA-1	2.23657	-0.970533
WT_GCGATTAGTAACCAGC-1	-0.836863	2.01914
WT_GCGCCTTGTGATGAGG-1	6.2181	-10.7848
WT_GCGCCTTGTGTTGCAA-1	-5.5671	-1.32027
WT_GCGCCTTGTTAACACG-1	-13.5845	-4.83272
WT_GCGCCTTGTTCCGGGA-1	1.50271	5.71819
WT_GCGCGATTCAGCAAGA-1	1.26076	7.03163
WT_GCGCTAGGTAAGGTCC-1	0.777709	-7.48487
WT_GCGCTAGGTCCTTCTC-1	-3.68736	-2.51454
WT_GCGCTAGGTTCCGCAC-1	4.6737	-9.38487
WT_GCGCTTAAGATACTTG-1	1.44226	5.59617
WT_GCGCTTAAGGAAGCAC-1	0.857987	-1.62655
WT_GCGCTTAAGGGATGAC-1	1.72387	1.87682
WT_GCGCTTGCACAAGCCT-1	-4.51346	1.97154
WT_GCGCTTGCAGTAGGTG-1	5.70789	-10.2112
WT_GCGGAACCAACTGGGA-1	-4.80821	1.50361
WT_GCGGGTTTCCGTAAAC-1	8.75145	0.274662
WT_GCGGTTGGTTTAGCTC-1	1.45875	-1.91598
WT_GCGTAACGTAAGTCGC-1	-1.28301	-0.0388009
WT_GCGTAACGTTTACGTC-1	-0.211162	-1.53678
WT_GCGTGCTAGTTCCCGT-1	-13.2226	-5.68782
WT_GCTAACAGTCATGCCC-1	-13.6241	-3.86442
WT_GCTAACAGTTAAGCCA-1	-6.70664	8.29534
WT_GCTAACAGTTTCAGGA-1	-3.79734	0.79597
WT_GCTAACCCACAACCTA-1	-4.16626	-0.394318
WT_GCTAACCCAGGATGGC-1	12.9692	4.74066
WT_GCTAAGAAGCATTATG-1	1.9466	-9.22565
WT_GCTAAGCGTACGGTAC-1	1.33784	6.24392
WT_GCTAAGCGTATTGTCC-1	6.07346	-10.2994
WT_GCTAAGCGTTGGCGTG-1	-4.11221	-11.3424
WT_GCTAAGTTCAGCCAAT-1	-4.59775	-10.4262
WT_GCTAAGTTCCCGCAAA-1	8.41204	0.444769
WT_GCTAATATCCGGAACC-1	1.24058	-9.29652
WT_GCTAGCGGTTAGGCGT-1	1.26459	-0.701575
WT_GCTAGCTCAGCTAATT-1	4.7353	-9.66498
WT_GCTAGTGTCCTGAATA-1	12.9226	5.55823
WT_GCTAGTGTCTGGCATG-1	-1.46495	2.68535
WT_GCTATCCTCCCGTTAC-1	-4.31172	-9.91509
WT_GCTATCCTCCCTGATC-1	-3.66729	-11.4527
WT_GCTATCCTCTCATCAT-1	-2.2432	-0.565092
WT_GCTATTGCAACCCTAA-1	0.638691	1.26143
WT_GCTCAACCACAGAACG-1	10.8469	-0.5805
WT_GCTCACAAGAACCTGT-1	-4.1585	-10.8818
WT_GCTCACAAGATTCCTT-1	4.72344	-8.72793
WT_GCTCACAAGCTCATAA-1	0.856107	-1.48489
WT_GCTCCTTAGTACTGGT-1	4.46365	-8.44531
WT_GCTCTGGCATGAATAG-1	5.03228	-8.6418
WT_GCTCTGTTCGCGCTAA-1	-0.725033	-1.46948
WT_GCTCTGTTCGCTAGCA-1	11.597	5.18212
WT_GCTCTGTTCGCTATGG-1	-4.5638	3.18209
WT_GCTCTGTTCTCTAGCC-1	8.84311	0.238801
WT_GCTCTGTTCTTAGGGT-1	-1.66501	0.128671
WT_GCTGACATCACGCCAA-1	-2.53729	-1.64703
WT_GCTGACATCCCGTTTA-1	0.432174	2.52644
WT_GCTGACCAGCCTGGTA-1	-2.87783	3.2621
WT_GCTGAGGAGTCAGGCC-1	-4.03529	-11.0381
WT_GCTGAGGAGTTGTCCC-1	2.73391	-2.59601
WT_GCTGCAATCATTATGG-1	1.38419	8.64501
WT_GCTGCATCACAGAAAC-1	-4.30387	-10.5028
WT_GCTGCATCAGGCAAGC-1	-7.10653	8.27439
WT_GCTGGATGTGGTGAGA-1	-5.04597	1.07083
WT_GCTGGATGTTACCGGG-1	-8.24583	8.31137
WT_GCTGTGATCGATAACC-1	1.14722	7.7028
WT_GCTGTGATCTCATCAT-1	5.12759	-9.03718
WT_GCTGTGCAGCCTCTCG-1	5.21756	-9.21388
WT_GCTGTGCAGGGATGCG-1	0.929582	-2.19152
WT_GCTGTGCAGTTAACCA-1	-4.73584	1.94932
WT_GCTTAACAGACAACGA-1	-13.9451	-3.63899
WT_GCTTACCTCACCGGTA-1	12.0271	-0.0502398
WT_GCTTACCTCATGGTTA-1	7.45502	1.9351
WT_GCTTACCTCCCGCAAA-1	7.9149	1.52427
WT_GCTTAGTAGCAGCTCA-1	-13.705	-3.54753
WT_GCTTAGTAGGATTTGC-1	-3.62285	-11.3926
WT_GCTTAGTAGGGCTTTG-1	7.48646	1.17227
WT_GCTTAGTAGTAAGAAC-1	0.774409	-6.45932
WT_GCTTATCGTTACCGGG-1	0.962888	9.32014
WT_GCTTATCGTTCAAGCA-1	-4.52565	0.973738
WT_GCTTCGCGTCTTGCAT-1	-4.65303	-10.1424
WT_GCTTCGCGTTAAGCGC-1	-9.88943	8.51925
WT_GCTTGACCAGCTTACA-1	-3.86219	-11.3398
WT_GCTTGACCAGTTATCG-1	-4.80008	1.20008
WT_GCTTGTTGTTCCGCAC-1	-1.83825	-0.416281
WT_GCTTGTTGTTTGCTGT-1	-6.74771	8.10851
WT_GCTTTATTCTCACATT-1	7.00406	1.25679
WT_GCTTTATTCTTTAAGG-1	-7.74576	8.65948
WT_GCTTTCATCAAATCGC-1	11.4707	-0.439984
WT_GCTTTCATCACTCAAA-1	0.6482	-2.87117
WT_GCTTTCATCCTAAGAC-1	-4.1752	1.20515
WT_GCTTTGTGTACTTAGG-1	-4.62539	-10.5132
WT_GGAAACTCAGAGAGCC-1	-1.61161	0.510944
WT_GGAAACTCAGGAATCG-1	0.923028	-2.34256
WT_GGAAACTCATATTGAC-1	1.89436	-0.515122
WT_GGAACCACAGAGGGAG-1	-13.2828	-5.68863
WT_GGAACCTGTCACGGAT-1	-0.826708	-2.76677
WT_GGAACGGTCGGTAACT-1	1.0098	-8.18702
WT_GGAACTAAGCGCATTG-1	-0.746692	-2.20915
WT_GGAAGTATCGATCAGT-1	-2.10738	0.0841813
WT_GGAATCTTCAAAGGCA-1	11.1212	-0.580656
WT_GGACAGCCACCTCAGG-1	5.81324	-9.28121
WT_GGACAGCCATGTTGGC-1	-4.69813	1.05959
WT_GGACATAAGAGCCGGA-1	0.383692	1.22296
WT_GGACATAAGTCGCTAG-1	0.846001	9.09229
WT_GGACGGATCATGCTCC-1	1.21639	-8.72876
WT_GGACTAAAGTTGGGCC-1	-2.54052	-2.36235
WT_GGAGCATAGATGGAGC-1	-8.75756	8.68825
WT_GGAGCATAGCTGGCTA-1	-0.980106	-0.352955
WT_GGAGCATAGGAAGCAC-1	0.424305	-2.22079
WT_GGAGCATAGGCGGGTA-1	-5.25822	2.27944
WT_GGAGCGATCAATACGC-1	7.04533	-0.618803
WT_GGAGCGATCGCTAGTG-1	1.32527	8.92397
WT_GGAGTGAGTGAATCGC-1	-1.13855	2.81706
WT_GGAGTGAGTTGTTGCT-1	0.64094	-10.0366
WT_GGATAACCATTGTGAT-1	-7.09716	8.21149
WT_GGATACTTCCGCTAGA-1	-2.5748	3.05784
WT_GGATACTTCCGGTTGA-1	0.785475	0.846075
WT_GGATATTGTAAGGTTT-1	-1.02273	-1.69823
WT_GGATATTGTGGTTAGC-1	12.8528	4.65365
WT_GGATGGCCAACCGCCA-1	6.88691	-1.06354
WT_GGATGGCCACCATATG-1	-9.5743	8.30469
WT_GGATGGCCAGCATGTC-1	-3.28202	1.6231
WT_GGATGTAAGTTTCCTG-1	2.18468	1.27292
WT_GGATTGCGTGAGGTGA-1	-2.23441	2.62108
WT_GGATTGCGTTAATGAC-1	-7.57298	8.51808
WT_GGATTGCGTTGCAATG-1	-0.762443	0.869402
WT_GGCAAATCAACCCTCC-1	1.01289	-9.72301
WT_GGCAATCGTAGTAAGA-1	1.12008	-9.11819
WT_GGCAATCGTTAGTTGG-1	12.6621	3.7969
WT_GGCAGGATCATGTCAA-1	6.00647	-9.43568
WT_GGCATGGAGCAAGGGT-1	-2.79768	2.28438
WT_GGCATTAGTTGGGTTA-1	9.46374	-3.48871
WT_GGCATTGTCATGGTGT-1	-7.70361	8.0259
WT_GGCCAACTCCAACTGG-1	2.11053	1.61582
WT_GGCCAACTCTAATCCT-1	-0.160403	-1.00105
WT_GGCCATCAGAACCTGT-1	1.33262	1.53946
WT_GGCCATCAGCATGTCG-1	1.37218	7.21912
WT_GGCCGTTAGTCATTAG-1	-0.340392	-2.22716
WT_GGCCTCTGTGAGGTGA-1	-2.05742	-0.0998867
WT_GGCCTCTGTGCGCGTA-1	12.9389	5.69249
WT_GGCCTTCGTACGGTAC-1	1.58206	2.76478
WT_GGCCTTCGTCAATGTG-1	-5.11485	0.0132322
WT_GGCCTTCGTGTCCTGC-1	-13.9067	-3.0387
WT_GGCGATACAGGCTTCG-1	0.964832	7.7758
WT_GGCGCTAGTTTGGCGG-1	-5.99642	-2.82141
WT_GGCGGTAAGCACGTTG-1	-13.4254	-4.92808
WT_GGCGGTAAGTCTGGGC-1	0.380321	-2.45801
WT_GGCGGTTTCGGTTTCC-1	5.20537	-8.88204
WT_GGCGTTATCCGCCAAA-1	7.16773	1.10355
WT_GGCTAGACAGGTATTT-1	-2.78271	2.95852
WT_GGCTAGACATGCTTAG-1	7.41421	2.19412
WT_GGCTATGTCCCTCACG-1	1.59627	1.08069
WT_GGCTCAATCCTAAGTA-1	-4.33294	-10.4178
WT_GGCTCACAGATTGAGG-1	0.491407	-6.95843
WT_GGCTCACAGGCTTAAC-1	4.66124	-9.66077
WT_GGCTGAGAGTCACGAT-1	1.43828	2.75842
WT_GGCTGGTTCCCTCAGT-1	2.32857	-2.46843
WT_GGCTGTCAGGTCCTGA-1	7.27382	2.33877
WT_GGCTGTCAGTGAGGGT-1	-0.0439071	1.2073
WT_GGCTTAAGTGCTGGTG-1	-1.77463	2.33973
WT_GGCTTAAGTTGGTTGA-1	-0.215087	-1.57859
WT_GGGAATATCGAGCTAT-1	0.523801	3.2647
WT_GGGAGTAGTAGTTGGC-1	-0.976409	2.79452
WT_GGGAGTAGTTTCCTCC-1	1.53751	8.81373
WT_GGGATTAAGCGCAATT-1	-4.50815	-9.98637
WT_GGGCAATAGGCGAAAC-1	5.1619	-10.0332
WT_GGGCATTGTCACCAAA-1	1.13677	-9.03907
WT_GGGCATTGTTACAAAC-1	1.14439	9.23353
WT_GGGCCTAGTCAAGACC-1	-3.86114	-11.3558
WT_GGGCTAACAGCATGAG-1	-1.0764	-2.39447
WT_GGGTATTTCAGCTAAC-1	7.2992	-0.465712
WT_GGGTATTTCCTCAGTC-1	-8.16372	8.19779
WT_GGGTATTTCTTGATGA-1	-1.31093	2.16191
WT_GGGTCACTCGGTTAGT-1	5.78207	-9.26686
WT_GGGTGAAGTGTTGTGA-1	-0.37007	1.77735
WT_GGGTGTTGTGTGAGGA-1	-2.75586	0.260403
WT_GGGTGTTGTTAAGCGC-1	-1.03428	-0.474942
WT_GGGTTACGTTGACTTC-1	0.563877	3.29141
WT_GGGTTACGTTTCCACG-1	-3.47455	-10.8139
WT_GGTAAACCACAATGCC-1	13.0387	4.80239
WT_GGTAACCGTCGACTCC-1	0.267668	6.32089
WT_GGTAACCGTTATGTGG-1	0.978304	5.97201
WT_GGTAACTTCTGGCAAT-1	5.78772	-9.28571
WT_GGTAAGGGTCATTAGG-1	-3.35113	0.594203
WT_GGTAAGGGTGTTGCTT-1	-10.4428	8.64816
WT_GGTAATTGTAGGATTT-1	-3.80123	-10.918
WT_GGTAATTGTCGCAATA-1	-2.28151	1.47336
WT_GGTACAAAGGCGTAAA-1	-3.83635	-2.75223
WT_GGTACAAAGGCTTAGT-1	-3.8416	-11.3554
WT_GGTACCGGTCTAACAG-1	-4.93416	0.0712992
WT_GGTACTAGTAGGTTGC-1	0.321281	-1.8986
WT_GGTACTAGTTTAAAGC-1	6.85771	2.35828
WT_GGTACTTAGCATTATG-1	-3.53849	-10.8948
WT_GGTACTTAGGACCTCA-1	-13.7295	-3.99111
WT_GGTACTTAGGTCCACA-1	1.25483	-9.4999
WT_GGTATGTTCCACCTTA-1	-3.94848	-11.5354
WT_GGTATGTTCGTTACTT-1	-10.2013	8.58034
WT_GGTATGTTCTACCTAT-1	1.17309	1.62669
WT_GGTATTGGTTTAACGG-1	0.917795	9.09246
WT_GGTATTGGTTTGCGAA-1	0.882988	-7.74941
WT_GGTCAATTCAAGTGTC-1	4.75427	-8.42134
WT_GGTCAATTCACCTGTC-1	-0.895656	-1.91603
WT_GGTCAATTCTAAGTCA-1	-3.77008	-2.63382
WT_GGTCAGGAGCAGGTGG-1	-2.33431	-0.429758
WT_GGTCAGGAGGTGTCCA-1	-3.55981	-10.7295
WT_GGTCCATCAAACTGCC-1	-3.22639	0.22486
WT_GGTCCATCATAAGTTC-1	0.712088	8.80199
WT_GGTCCGTAGAATGACG-1	-2.8849	0.0174037
WT_GGTCCGTAGCAGGTGG-1	-0.153881	-0.954109
WT_GGTCCGTAGCCTAACG-1	0.503216	-2.75054
WT_GGTCCGTAGTTAGTGC-1	1.13471	-9.30167
WT_GGTCCTGCAAGTGAAC-1	10.6357	-0.471254
WT_GGTCGGTTCAATTGGC-1	8.94828	-0.457103
WT_GGTCGGTTCGCTAGCA-1	1.44509	-8.88056
WT_GGTCGGTTCGCTAGTG-1	12.8572	5.83799
WT_GGTCTTGAGTCGCAAT-1	4.31689	-8.72195
WT_GGTCTTGAGTGTTGCG-1	-0.196744	5.13189
WT_GGTCTTTGTAGCTAGC-1	-13.6758	-3.67467
WT_GGTCTTTGTCACAAAT-1	0.104397	-2.35062
WT_GGTGAGCCAACAGCCT-1	-13.4681	-4.16941
WT_GGTGAGCCACAATACT-1	-8.92886	8.49003
WT_GGTGAGGTCCACCTGT-1	-3.51931	-10.6295
WT_GGTGAGGTCCAGCACA-1	7.00588	1.15069
WT_GGTGATTTCGTAATCA-1	-2.00728	2.3132
WT_GGTGCTGGTCAAGTGC-1	-7.73645	7.81523
WT_GGTGCTTCACTAAATC-1	1.36945	-8.86847
WT_GGTGTCCAGCAAGGGT-1	5.52013	-9.79646
WT_GGTGTGACACTGGCCA-1	-6.92967	8.11505
WT_GGTGTGACATTATGCG-1	0.608129	3.37237
WT_GGTGTTGTCTGCAAAC-1	1.10275	4.94178
WT_GGTGTTGTCTGGCATG-1	0.0674038	1.05144
WT_GGTTAATGTAAGCACC-1	10.438	-0.577764
WT_GGTTAATGTTGCGGAT-1	4.7773	-9.68907
WT_GGTTACCCAAATTGCT-1	5.04713	-8.94151
WT_GGTTACCCAAGTGTTT-1	-4.19021	-11.3792
WT_GGTTACCCAATATAGG-1	4.62789	-8.68423
WT_GGTTACTAGGCCAATT-1	6.03849	0.372113
WT_GGTTAGCGTACAATGT-1	-4.53035	-10.2495
WT_GGTTAGCGTCATCATC-1	-4.14963	-11.4548
WT_GGTTAGCGTCATTGAG-1	2.4885	-0.296186
WT_GGTTAGCGTCCGTGAG-1	2.79456	-2.37338
WT_GGTTAGCGTGGTGAGA-1	1.7655	9.05716
WT_GGTTATATCATGGTGT-1	-5.99686	-1.41892
WT_GGTTATATCCGCATGA-1	6.8808	0.402934
WT_GGTTATATCCTTCAAT-1	-2.49701	0.777474
WT_GGTTATATCGCATTAA-1	1.75786	-0.789786
WT_GGTTATGGTATACTGG-1	-6.26637	-0.664366
WT_GGTTATGGTTAGCTGA-1	-0.38148	5.15004
WT_GGTTCCCGTTGGTGAC-1	-0.059861	1.84149
WT_GGTTCTTGTGAGACTC-1	-4.91629	-0.0445768
WT_GGTTGACGTTCATCTA-1	1.20789	-8.98718
WT_GGTTGCGGTTACGCGG-1	2.01849	-0.945728
WT_GGTTGCTCATAGCTTG-1	0.798607	1.32732
WT_GGTTGGTGTTGACTTC-1	-0.145445	-2.03596
WT_GGTTTAATCCCTCGCA-1	13.0985	4.59199
WT_GGTTTCCTCCTGATGG-1	-3.8154	-11.4623
WT_GGTTTCTGTCATAACG-1	5.42668	-9.10672
WT_GGTTTCTGTTAAGCTG-1	-3.8632	-11.324
WT_GGTTTCTGTTACTAGG-1	0.325741	3.72231
WT_GGTTTCTGTTGTTGTC-1	-2.23849	-0.362568
WT_GGTTTCTGTTTGTTGC-1	-4.69832	1.00585
WT_GGTTTGTAGATACTTG-1	1.11735	9.29013
WT_GTAAAGCCAAACGGGC-1	-8.30625	8.23501
WT_GTAAAGCCAAGTAAGC-1	1.26253	8.99903
WT_GTAAAGCCAATGCCTA-1	-1.67979	2.34116
WT_GTAAGCAAGCTTAGTA-1	2.37835	-2.08941
WT_GTAAGCAAGGCATGAA-1	-2.28892	0.509051
WT_GTAAGCGCACCTCGCT-1	12.5785	4.79102
WT_GTAAGGTCAGGCTGTT-1	-9.17186	8.18936
WT_GTAATAGCAAAGGTAC-1	-2.27746	-1.40656
WT_GTAATAGCACAACAGG-1	-8.93265	8.55264
WT_GTAATAGCAGCAAATA-1	-3.87821	-10.4229
WT_GTAATAGCATAAGGAC-1	1.36903	3.57969
WT_GTACAATGTCACAAAT-1	-9.45226	8.34342
WT_GTACAATGTGTTTGAG-1	-1.87873	1.00351
WT_GTACAATGTTCTTTAG-1	-6.88475	8.27973
WT_GTACAATGTTGGTTGA-1	1.03729	5.89463
WT_GTACACCCACAAGCCT-1	-3.6054	-11.1785
WT_GTACACCCACATAGCC-1	-3.09487	2.87267
WT_GTACCTTGTACCGAAC-1	-1.11087	-2.64743
WT_GTACCTTGTGCAACTA-1	0.694558	0.709752
WT_GTACCTTGTTACAACG-1	-2.28383	-0.253243
WT_GTACCTTGTTACCTGT-1	9.70153	-0.378819
WT_GTACCTTGTTATGTGG-1	0.968246	5.21508
WT_GTACGTAGTGTGTCCC-1	1.22762	9.36521
WT_GTACGTAGTTTCCACG-1	0.574104	5.98868
WT_GTACTAGGTATGTGGC-1	1.13113	8.38759
WT_GTACTGGTCGGTCAGC-1	-1.05344	2.1266
WT_GTACTTCGTCGACTCC-1	-3.82247	-11.3751
WT_GTACTTCGTCGCATAA-1	-10.5216	8.7421
WT_GTACTTCGTTGCAGTA-1	-0.183532	-1.59421
WT_GTAGCCATCCCGCATT-1	-4.35326	-3.14632
WT_GTAGCGCTCGGTCAAT-1	-6.09357	-2.65755
WT_GTAGCTGTCCAAATCA-1	-2.05385	-0.112578
WT_GTAGGAGGTTGTTGCT-1	-2.77967	0.272902
WT_GTAGTTATCAGGCCTA-1	0.473346	8.26874
WT_GTAGTTATCCGCCTAT-1	-0.053497	2.28415
WT_GTATCGCCACATAACT-1	0.862274	1.73979
WT_GTATCGCCAGCAAGAT-1	-5.14457	1.43343
WT_GTATGTGGTAAGCACC-1	-1.15088	-1.75619
WT_GTATGTGGTATTCGCT-1	-2.37089	-1.64203
WT_GTATGTGGTGACATGC-1	0.287398	1.14721
WT_GTATTGCAGTGAAGTG-1	-4.92804	-2.51306
WT_GTCAAACTCGACCTGA-1	12.698	4.78671
WT_GTCAATATCGCTATAA-1	-3.14012	2.98038
WT_GTCATCCTCATTTGTC-1	-13.8216	-3.16992
WT_GTCATGAGTCTTGCAT-1	-4.5816	1.04845
WT_GTCATTAAGCATGCAT-1	13.1289	4.98723
WT_GTCCAAGTCAAGCTTA-1	0.929739	5.97906
WT_GTCCAGGGTGCTTAGA-1	0.788139	-2.76
WT_GTCCATTGTTAGCATG-1	11.0596	0.0786127
WT_GTCCATTGTTGTAAAC-1	5.35419	-9.17954
WT_GTCCATTGTTTCAGGA-1	0.978312	-8.21029
WT_GTCCGTAAGCATTAGC-1	7.05746	2.41894
WT_GTCCGTAAGGCTGTCA-1	0.736616	-1.9529
WT_GTCCTAGAGGACACTT-1	-3.52465	-10.6539
WT_GTCCTAGAGGTTAGAG-1	11.7809	-0.334856
WT_GTCCTAGAGTCCTTCA-1	0.760639	1.33547
WT_GTCCTCAGTAATCGGC-1	0.851175	-2.4079
WT_GTCCTCAGTCAAAGGG-1	-3.77797	-2.74703
WT_GTCCTCAGTCATTGAG-1	6.83009	-0.481947
WT_GTCCTCAGTTGCACGG-1	-7.63799	8.60884
WT_GTCCTCAGTTGTTGGA-1	-13.9097	-3.11795
WT_GTCCTCCCATAATGAG-1	-3.15423	3.33713
WT_GTCCTCCCATAGACTT-1	-2.53864	-1.0749
WT_GTCGAGGAGCTTAGTA-1	2.44942	-0.467169
WT_GTCGAGGAGGGCTTTG-1	1.66856	2.74002
WT_GTCGGTTCAATAACCT-1	-4.24957	-11.3388
WT_GTCTAACAGCTCCCTG-1	4.92538	-9.53543
WT_GTCTAATCAATTTAGC-1	-4.45887	-9.99652
WT_GTCTAGCCATGGTTAT-1	-13.7829	-2.89375
WT_GTCTATCGTAATGGAA-1	7.08074	2.34778
WT_GTCTATCGTCATAGAT-1	2.13954	-0.513209
WT_GTCTATCGTTGAAGCC-1	6.4034	-10.9341
WT_GTCTCACTCATTGTTC-1	-1.04688	-1.07595
WT_GTCTCACTCCCTGGTT-1	0.366234	-7.00335
WT_GTCTCACTCCTAACGG-1	0.619549	9.20019
WT_GTCTTTAGTACGGGTT-1	7.7614	1.03018
WT_GTCTTTAGTACTTAGG-1	-2.74101	-1.82672
WT_GTCTTTAGTTAGAGCC-1	4.25613	-8.62586
WT_GTCTTTGTCCTAAATG-1	2.02016	-1.42931
WT_GTCTTTGTCTAACCAA-1	1.21959	8.76285
WT_GTCTTTGTCTAGCTAA-1	-5.29198	2.52515
WT_GTGAACAAGGCTACTG-1	5.7051	-9.27369
WT_GTGAATCTCTTGGACG-1	-3.91644	0.57243
WT_GTGAGCGAGGATGATG-1	-5.09612	1.69469
WT_GTGAGCGAGGCTTAAC-1	-8.08343	8.16801
WT_GTGAGCGAGTAGCCAT-1	-4.53311	-10.6965
WT_GTGAGGAGTGTTGCTT-1	-0.496684	4.75175
WT_GTGATCAGTTGGTTCT-1	-13.3579	-5.51055
WT_GTGATCAGTTGTTGGA-1	-5.25061	-2.33323
WT_GTGATGAAGTCTGGGC-1	-2.43356	-0.0755675
WT_GTGCAAGCATTGTTGG-1	-3.84918	0.624527
WT_GTGCACGGTCCACAAA-1	-4.23855	0.870036
WT_GTGCATTAGACTTACA-1	0.833512	-10.0087
WT_GTGCCTTTCTTACTCG-1	-4.88693	1.65856
WT_GTGCGCAGTAGGTGTC-1	1.37477	-9.40469
WT_GTGCGCAGTGCATTTC-1	-2.94288	-1.86316
WT_GTGCGCAGTGTGAGAG-1	-13.4326	-4.71189
WT_GTGCTCAAGGGATGCG-1	-2.36588	2.25288
WT_GTGCTCCGTGCATTAG-1	-2.52258	-0.00223501
WT_GTGCTCCGTTTAGTCC-1	-2.52478	-1.463
WT_GTGCTGATCTTAAGTG-1	0.0994233	-2.24551
WT_GTGCTGGGTTCGCGCT-1	-7.95875	8.54247
WT_GTGCTGGGTTGGTGAC-1	-6.2522	0.0520618
WT_GTGCTTCTCCGCAAGC-1	-8.20153	8.70997
WT_GTGGACACATGCTATG-1	0.631079	-10.1762
WT_GTGGCTTCATGTCGCG-1	1.57258	7.03708
WT_GTGGCTTCATTAGGTT-1	4.79028	-9.46193
WT_GTGTCCAAGCAAGGAC-1	0.850163	-2.36519
WT_GTGTGTTAGCGAGGTG-1	2.67352	-2.22258
WT_GTGTGTTAGGCTAGAA-1	-0.5657	2.22697
WT_GTGTGTTAGGTTTGCG-1	1.49812	3.28602
WT_GTTAACGGTGGACCTG-1	-13.4982	-4.92632
WT_GTTAAGCTCAGGATGA-1	0.467371	-7.05343
WT_GTTAAGCTCCCGCAAA-1	-2.49441	-0.373034
WT_GTTAAGCTCGGCCATA-1	-4.78387	0.919203
WT_GTTAATGTCGAGCAAA-1	4.49479	-9.49451
WT_GTTAATGTCTAAGTCA-1	0.64845	-2.44484
WT_GTTACAGGTTAATCGG-1	6.70359	1.28646
WT_GTTACGCCAAATTGCT-1	0.414262	8.39124
WT_GTTACGCCACTTAACG-1	-7.53549	7.90224
WT_GTTACTAAGGCGGGTA-1	2.44491	-2.19529
WT_GTTACTCGTAAGGTTT-1	-3.06615	0.410974
WT_GTTACTCGTAATCGTG-1	-4.10603	-11.5049
WT_GTTACTCGTAATGGAA-1	9.37381	-3.37911
WT_GTTACTCGTAGGTTGC-1	11.6819	-0.29745
WT_GTTAGACTCCAAACAC-1	1.48577	1.68253
WT_GTTAGACTCCGTGACA-1	11.36	-0.528131
WT_GTTAGACTCTAAATCG-1	2.4774	-2.33436
WT_GTTAGACTCTAAGGAG-1	-2.41523	3.12583
WT_GTTAGGCGTACTGATG-1	-0.35189	-2.71177
WT_GTTAGGCGTAGCCTCC-1	0.908445	7.00236
WT_GTTAGGCGTCCTGATT-1	0.745522	-2.72804
WT_GTTAGGCGTTAACAGT-1	-8.38902	8.25761
WT_GTTAGGCGTTTGACCT-1	-4.25589	-11.2958
WT_GTTCACCTCATTGTCT-1	-5.04098	2.9941
WT_GTTCATTTCGGCTATG-1	-5.94899	-2.38749
WT_GTTCCCAGTACGGGTT-1	-3.68678	-11.4411
WT_GTTCCCAGTCAATAGT-1	-7.14323	8.40466
WT_GTTCCTGGTGCCTCAC-1	-0.978286	0.922502
WT_GTTCCTGGTTTGAGCA-1	0.774918	-9.94845
WT_GTTCCTTCAATAATGG-1	-2.3859	-0.199758
WT_GTTCCTTCATCCATCT-1	8.20943	-0.268257
WT_GTTCCTTCATTAGCCA-1	-4.37099	0.784594
WT_GTTCGCGCAGCATGAG-1	-2.62703	0.667965
WT_GTTCGCTTCAAACTCA-1	10.5694	-0.333129
WT_GTTCGCTTCGCTAGTG-1	-2.423	3.06218
WT_GTTCTCATCAAGCGCC-1	7.67858	1.84296
WT_GTTCTCATCCGCAACA-1	4.92097	-8.82191
WT_GTTCTCATCGCTAAGT-1	-7.0158	8.3434
WT_GTTCTTGTCTTAGCGG-1	1.321	4.04674
WT_GTTGCCCGTGCGCAAT-1	-4.06221	-11.2809
WT_GTTGGCGGTCCTAAGA-1	-10.5287	8.74583
WT_GTTGGCGGTTAGCATG-1	-0.217677	1.84176
WT_GTTGGCGGTTGTCCAT-1	1.6313	3.02144
WT_GTTGGCGGTTTATCGC-1	-0.534526	-1.82048
WT_GTTGTGAGTCGCATAA-1	10.1701	-0.959002
WT_GTTGTGAGTTGAGGTC-1	0.833804	-7.83803
WT_GTTGTGAGTTGCCTCA-1	0.638647	-10.0921
WT_GTTTAACCAGGCCAAA-1	0.661483	-10.1689
WT_GTTTACCGTATACTGG-1	-6.08857	-1.25798
WT_GTTTACCGTTATAGCG-1	-4.52063	-10.5216
WT_GTTTACCGTTCCAGGG-1	1.53721	-1.77646
WT_GTTTACCGTTTGACCT-1	1.76235	1.92154
WT_GTTTACCGTTTGGCGG-1	1.4533	-1.06351
WT_GTTTAGCAGCATCCAG-1	-4.04494	-11.505
WT_GTTTAGCAGCCTGATG-1	11.471	-0.339462
WT_GTTTAGCAGCTTCCCG-1	-0.303569	-1.89356
WT_GTTTAGCAGGTCGAGG-1	-2.00971	0.24499
WT_GTTTATCTCCTACCTA-1	-0.14676	0.676425
WT_GTTTATCTCGTTATAG-1	1.53509	-1.68101
WT_GTTTCCTCAGAGGCTA-1	-0.511067	5.72351
WT_GTTTGTAAGAGGATAT-1	-0.456311	2.54092
WT_GTTTGTAAGGGTTAGA-1	-2.99466	0.325337
WT_GTTTGTCGTGCTCCGT-1	-5.09259	1.20941
WT_GTTTGTTTCATTACTC-1	-2.18949	-0.88884
WT_TAAACAGCACACAATT-1	4.62888	-8.87862
WT_TAACAAGCAAACTGTT-1	-0.323114	5.75538
WT_TAACAAGCAACCCTCC-1	12.0015	5.07056
WT_TAACAAGCACAACAGG-1	-3.52887	-11.1639
WT_TAACCAGGTAACGGGA-1	-4.02586	-10.9517
WT_TAACCAGGTACTGATG-1	4.6948	-8.62246
WT_TAACCAGGTTTGTCTA-1	-1.31875	-2.03932
WT_TAACCTAAGGTCGATT-1	5.05077	-9.30055
WT_TAAGCCTAGGCATTGT-1	4.79881	-8.52765
WT_TAAGCTATCAGCACCA-1	-4.76992	3.22991
WT_TAAGCTGGTAATCGGC-1	-3.74561	0.0158944
WT_TAAGGACCACCCTCAC-1	5.29153	-8.87239
WT_TAAGGCTTCATGAGCT-1	-13.6514	-4.41433
WT_TAAGTGCTCATGGCTG-1	5.93689	-9.70791
WT_TAAGTGCTCCTGGCTT-1	-13.9285	-3.46526
WT_TAATCACCACACCAAC-1	5.74131	-9.16393
WT_TAATCACCACTGACCG-1	1.02248	1.7047
WT_TAATGCATCGGTCAAT-1	5.22413	-10.3336
WT_TAATGCATCTCTAGCC-1	-3.55786	-11.2603
WT_TAATGGACACAGGAAT-1	0.222947	8.10224
WT_TAATGGACATAATGAG-1	0.857678	6.16473
WT_TAATGGACATGTCAAT-1	0.7634	-9.93543
WT_TAATGGTGTTAGCAGC-1	-0.455195	-2.74233
WT_TAATTGCCAGGAACTG-1	7.28602	2.02932
WT_TACAGCTAGACACCGC-1	-2.27945	1.50099
WT_TACAGCTAGCGGCTGT-1	2.28061	-2.35144
WT_TACAGGTTCAAATCGC-1	-2.28316	-1.08243
WT_TACAGGTTCAATACGC-1	-2.47421	1.65986
WT_TACAGGTTCGCTATGG-1	-3.47218	-10.7148
WT_TACATCAAGCTGGCTA-1	-13.5797	-4.83018
WT_TACATCAAGGAGCACG-1	1.10501	-9.18968
WT_TACCAAATCGCTAAAC-1	-2.88553	3.25782
WT_TACCAAATCGTTATAG-1	-0.991336	0.101907
WT_TACCCGGCAAGGACCA-1	0.997727	4.84106
WT_TACCGAAGTCTCAGCC-1	-0.32096	-2.54886
WT_TACCGCAAGTGCTGTG-1	-2.33774	2.1371
WT_TACCGTTGTTACGCGG-1	1.30275	-8.95482
WT_TACCTCATCATGCAAC-1	5.052	-9.51248
WT_TACCTGCTCTTGGACG-1	-0.83432	1.12653
WT_TACCTTAGTGGTGAGA-1	1.04438	-8.2306
WT_TACCTTTAGCTACTGG-1	-3.46007	-1.97347
WT_TACGCACCAGGCGAGT-1	0.908256	-7.96747
WT_TACGCACCATTATCCC-1	-4.39256	2.36298
WT_TACGGATTCGATATTG-1	-4.62932	-10.4765
WT_TACGGATTCGTCAAGT-1	-2.53532	-2.56035
WT_TACGTAATCTTGAGCG-1	1.70541	6.52067
WT_TACGTACAGGAAGCTA-1	0.863555	-1.47991
WT_TACGTACAGGGACGCA-1	2.2643	-1.04893
WT_TACGTACAGTCAATTG-1	-1.79464	-0.831731
WT_TACGTTAAGCCTCTGT-1	13.2727	4.71848
WT_TACTCAAAGAACCTAC-1	-2.87629	3.01471
WT_TACTCAAAGCAAGATG-1	-2.46118	-1.71055
WT_TACTCGCTCATTAGGC-1	-6.02937	1.5385
WT_TACTGACAGCAGGCCT-1	-2.35042	-3.19461
WT_TACTGACAGCATTAGC-1	-5.41347	2.77907
WT_TACTGCACAATCCTAG-1	0.985217	8.94039
WT_TACTGCACAGACAAAC-1	1.93321	-0.943838
WT_TACTGGCCAAGCTAAA-1	1.91458	-1.23036
WT_TACTTCGTCTACTAAG-1	0.766643	-2.57216
WT_TACTTGTTCCTGAATA-1	1.39948	-9.29509
WT_TACTTGTTCCTTAATC-1	1.19477	-9.57679
WT_TACTTGTTCGGTCAAT-1	-3.56475	-10.9792
WT_TACTTGTTCTGTGAGT-1	-3.53905	-10.6332
WT_TAGCCGGGTTATCCGT-1	9.30199	-0.397793
WT_TAGCCTCTCTTTAAGG-1	1.16473	-9.48434
WT_TAGCCTGAGCAACATC-1	0.806462	-1.56063
WT_TAGCCTGAGCTTATGA-1	6.86774	-0.496809
WT_TAGCCTGAGTAAGGGC-1	-8.88448	8.41433
WT_TAGCCTTGTACCTTAC-1	7.72987	0.945842
WT_TAGCCTTGTGTTTCAC-1	0.400529	-7.02059
WT_TAGCGCGGTGCGCAAT-1	2.2709	-2.88545
WT_TAGCTAATCTCACTCA-1	0.160123	-1.89972
WT_TAGCTAGGTTAAGGTT-1	0.484719	-2.45457
WT_TAGCTTAAGGTGAGAC-1	0.841402	5.9657
WT_TAGCTTGCACCAGGTT-1	-5.61182	2.35772
WT_TAGCTTGCATTGCGTA-1	9.5908	-3.62624
WT_TAGGAACCAACCCTCC-1	7.36633	1.07626
WT_TAGGAACCAGGAACTG-1	0.296275	1.0251
WT_TAGGAACCATGCTCCC-1	-3.7519	-11.0934
WT_TAGGAGGGTTTCGCCA-1	0.569454	8.69556
WT_TAGGAGTCACGGTTTA-1	5.07335	-8.81619
WT_TAGGCTGTCCTTTACG-1	0.153324	-2.68462
WT_TAGGCTGTCTTGTCTG-1	-2.42632	1.10412
WT_TAGGCTTAGAGCCGCT-1	7.30878	1.99438
WT_TAGGCTTAGCACAGCC-1	7.39607	-0.115593
WT_TAGGCTTAGCTGGCTA-1	4.11707	-8.21868
WT_TAGGCTTAGGTGCTGC-1	0.583212	9.03688
WT_TAGGCTTAGTCCTTCA-1	0.789081	-9.98992
WT_TAGGCTTAGTTAGCTA-1	9.7119	-0.6565
WT_TAGGTTATCCGCACAA-1	-1.90229	-0.261404
WT_TAGGTTATCCTAATGA-1	12.8259	6.04644
WT_TAGGTTGGTGCTAGAC-1	-1.50125	-2.76189
WT_TAGGTTGGTTGTTGCT-1	0.735528	-2.34446
WT_TAGTAACGTCGAAGTC-1	12.8222	4.02394
WT_TAGTAAGCATCACAGC-1	1.55721	3.0169
WT_TAGTACGGTTGTCCAT-1	-3.76853	-2.45501
WT_TAGTACGGTTTGGGCG-1	-0.959101	1.41089
WT_TAGTCAATCCCTTGCG-1	1.51511	6.28421
WT_TAGTGAGAGGCCAATT-1	5.96038	-10.4358
WT_TAGTGTGGTGAGCACT-1	5.76679	-9.57479
WT_TAGTGTGGTGTTTGTC-1	-9.35918	8.14165
WT_TAGTGTGGTTTAGCGA-1	-3.00761	-2.17127
WT_TAGTTGTCAGTTTACG-1	-4.51715	-10.0137
WT_TAGTTTGAGGCATGTT-1	0.871347	1.48667
WT_TAGTTTGAGTCACGAT-1	-1.81474	-0.637945
WT_TATAACCCAGGATGGC-1	5.06617	-9.55553
WT_TATAACCCATAGCTGC-1	-3.74653	-11.1191
WT_TATAGCCAGCGGATTT-1	-3.72974	0.507061
WT_TATAGCCAGCTTACTT-1	-2.96698	0.544477
WT_TATAGCCAGTTAGTTG-1	0.638716	-10.1163
WT_TATATCCTCACAGACT-1	3.788	-7.96149
WT_TATCACAAGTCACGAT-1	0.782373	-1.61617
WT_TATCACGCAATAAGCA-1	0.936318	5.79163
WT_TATCCAGCAACTAGCC-1	-13.3399	-5.50475
WT_TATCCAGCATAGGCGA-1	-4.48269	-10.3874
WT_TATCCAGCATCGCTCC-1	0.831848	-7.65882
WT_TATCCAGCATGATTGT-1	-8.4002	8.28721
WT_TATCCGGAGGCAAGTA-1	0.882743	-9.77237
WT_TATCGCACAGGCATCT-1	-0.771782	1.82966
WT_TATCGCACATTGCGAC-1	0.284486	8.0179
WT_TATCGCGAGAACCTGT-1	1.90255	-1.24376
WT_TATGAAGCAGGCTGTT-1	0.497473	-6.86097
WT_TATGAAGCATGCAACC-1	-4.31937	0.847783
WT_TATGACTCAACCCTCC-1	4.44783	-8.51439
WT_TATGCATCATAATGTC-1	-0.536304	5.04283
WT_TATTACCTCTAAATCG-1	7.34402	1.89789
WT_TATTACCTCTAAGTCA-1	-4.41249	-10.1624
WT_TATTCGTTCAGTTCCC-1	9.55383	-3.58643
WT_TATTCGTTCATGCTCC-1	1.00134	-9.72276
[truncated: 3,743 more rows]

## Sheet: Reference meta Data
	orig.ident	nCount_RNA	nFeature_RNA	cell_label	brain_section_label	cluster_alias	average_correlation_score	feature_matrix_label	donor_label	donor_genotype	donor_sex	x	y	z	neurotransmitter	class	subclass	supertype	cluster	neurotransmitter_color	class_color	subclass_color	supertype_color	cluster_color	combined_cluster
1.01917e+18	SCN	8523	5417	1.01917e+18	C57BL6J-638850.43	5283	0.529472	C57BL6J-638850	C57BL6J-638850	wt/wt	M	5.51402	8.26113	7.8		34 Immune	334 Microglia NN	1194 Microglia NN_1	5312 Microglia NN_1	#666666	#825f45	#CC1F4E	#62CC3D	#651FCC	334 Microglia NN
1.01917e+18	SCN	8710.38	4770	1.01917e+18	C57BL6J-638850.43	5283	0.576152	C57BL6J-638850	C57BL6J-638850	wt/wt	M	5.76606	8.45477	7.8		34 Immune	334 Microglia NN	1194 Microglia NN_1	5312 Microglia NN_1	#666666	#825f45	#CC1F4E	#62CC3D	#651FCC	334 Microglia NN
1.01917e+18	SCN	8227.45	5141	1.01917e+18	C57BL6J-638850.43	5283	0.652333	C57BL6J-638850	C57BL6J-638850	wt/wt	M	5.31522	8.59646	7.8		34 Immune	334 Microglia NN	1194 Microglia NN_1	5312 Microglia NN_1	#666666	#825f45	#CC1F4E	#62CC3D	#651FCC	334 Microglia NN
1.01917e+18	SCN	8179.75	5687	1.01917e+18	C57BL6J-638850.43	5283	0.512694	C57BL6J-638850	C57BL6J-638850	wt/wt	M	5.3713	8.59658	7.8		34 Immune	334 Microglia NN	1194 Microglia NN_1	5312 Microglia NN_1	#666666	#825f45	#CC1F4E	#62CC3D	#651FCC	334 Microglia NN
1.01917e+18	SCN	8468.99	5665	1.01917e+18	C57BL6J-638850.43	5283	0.601546	C57BL6J-638850	C57BL6J-638850	wt/wt	M	5.33048	8.55646	7.8		34 Immune	334 Microglia NN	1194 Microglia NN_1	5312 Microglia NN_1	#666666	#825f45	#CC1F4E	#62CC3D	#651FCC	334 Microglia NN
1.01917e+18	SCN	8469.85	5056	1.01917e+18	C57BL6J-638850.43	5283	0.564205	C57BL6J-638850	C57BL6J-638850	wt/wt	M	6.01925	8.33118	7.8		34 Immune	334 Microglia NN	1194 Microglia NN_1	5312 Microglia NN_1	#666666	#825f45	#CC1F4E	#62CC3D	#651FCC	334 Microglia NN
1019171907101550250-2	SCN	8792.42	4919	1019171907101550250-2	C57BL6J-638850.43	5283	0.683859	C57BL6J-638850	C57BL6J-638850	wt/wt	M	5.22167	8.34004	7.8		34 Immune	334 Microglia NN	1194 Microglia NN_1	5312 Microglia NN_1	#666666	#825f45	#CC1F4E	#62CC3D	#651FCC	334 Microglia NN
1019171907101540069-2	SCN	8206.7	5506	1019171907101540069-2	C57BL6J-638850.43	5283	0.584858	C57BL6J-638850	C57BL6J-638850	wt/wt	M	5.26226	8.59936	7.8		34 Immune	334 Microglia NN	1194 Microglia NN_1	5312 Microglia NN_1	#666666	#825f45	#CC1F4E	#62CC3D	#651FCC	334 Microglia NN
1019171907101890036-1	SCN	8714.01	5290	1019171907101890036-1	C57BL6J-638850.43	5283	0.559108	C57BL6J-638850	C57BL6J-638850	wt/wt	M	6.08488	8.37506	7.8		34 Immune	334 Microglia NN	1194 Microglia NN_1	5312 Microglia NN_1	#666666	#825f45	#CC1F4E	#62CC3D	#651FCC	334 Microglia NN
1019171907101730277-2	SCN	8408.64	5137	1019171907101730277-2	C57BL6J-638850.43	5283	0.514284	C57BL6J-638850	C57BL6J-638850	wt/wt	M	5.64129	7.8439	7.8		34 Immune	334 Microglia NN	1194 Microglia NN_1	5312 Microglia NN_1	#666666	#825f45	#CC1F4E	#62CC3D	#651FCC	334 Microglia NN
1019171907101710263-1	SCN	8589.44	4818	1019171907101710263-1	C57BL6J-638850.43	5283	0.609484	C57BL6J-638850	C57BL6J-638850	wt/wt	M	5.97914	8.47787	7.8		34 Immune	334 Microglia NN	1194 Microglia NN_1	5312 Microglia NN_1	#666666	#825f45	#CC1F4E	#62CC3D	#651FCC	334 Microglia NN
1019171907101550890-1	SCN	8479.22	5325	1019171907101550890-1	C57BL6J-638850.43	5283	0.739307	C57BL6J-638850	C57BL6J-638850	wt/wt	M	5.4668	8.20187	7.8		34 Immune	334 Microglia NN	1194 Microglia NN_1	5312 Microglia NN_1	#666666	#825f45	#CC1F4E	#62CC3D	#651FCC	334 Microglia NN
1019171907101550436-2	SCN	8610.49	4861	1019171907101550436-2	C57BL6J-638850.43	5283	0.665004	C57BL6J-638850	C57BL6J-638850	wt/wt	M	5.25787	8.0877	7.8		34 Immune	334 Microglia NN	1194 Microglia NN_1	5312 Microglia NN_1	#666666	#825f45	#CC1F4E	#62CC3D	#651FCC	334 Microglia NN
1.01917e+18	SCN	11617.6	5924	1.01917e+18	C57BL6J-638850.43	5283	0.608391	C57BL6J-638850	C57BL6J-638850	wt/wt	M	5.78651	7.95604	7.8		34 Immune	334 Microglia NN	1194 Microglia NN_1	5312 Microglia NN_1	#666666	#825f45	#CC1F4E	#62CC3D	#651FCC	334 Microglia NN
1019171907101550216-3	SCN	9266.73	5978	1019171907101550216-3	C57BL6J-638850.43	14980	0.810379	C57BL6J-638850	C57BL6J-638850	wt/wt	M	5.22755	8.5354	7.8		30 Astro-Epen	318 Astro-NT NN	1159 Astro-NT NN_1	5209 Astro-NT NN_1	#666666	#594a26	#AD5CCC	#350099	#4DFFA0	318 Astro-NT NN
1.01917e+18	SCN	10543	6051	1.01917e+18	C57BL6J-638850.43	14980	0.730718	C57BL6J-638850	C57BL6J-638850	wt/wt	M	5.98409	8.57339	7.8		30 Astro-Epen	318 Astro-NT NN	1159 Astro-NT NN_1	5209 Astro-NT NN_1	#666666	#594a26	#AD5CCC	#350099	#4DFFA0	318 Astro-NT NN
1.01917e+18	SCN	10366.8	6892	1.01917e+18	C57BL6J-638850.43	14980	0.575322	C57BL6J-638850	C57BL6J-638850	wt/wt	M	5.55381	8.31384	7.8		30 Astro-Epen	318 Astro-NT NN	1159 Astro-NT NN_1	5209 Astro-NT NN_1	#666666	#594a26	#AD5CCC	#350099	#4DFFA0	318 Astro-NT NN
1.01917e+18	SCN	13005.1	6729	1.01917e+18	C57BL6J-638850.43	14980	0.585878	C57BL6J-638850	C57BL6J-638850	wt/wt	M	5.96883	8.64005	7.8		30 Astro-Epen	318 Astro-NT NN	1159 Astro-NT NN_1	5209 Astro-NT NN_1	#666666	#594a26	#AD5CCC	#350099	#4DFFA0	318 Astro-NT NN
1.01917e+18	SCN	9888.39	6814	1.01917e+18	C57BL6J-638850.43	14983	0.773406	C57BL6J-638850	C57BL6J-638850	wt/wt	M	5.30134	8.54503	7.8		30 Astro-Epen	318 Astro-NT NN	1159 Astro-NT NN_1	5210 Astro-NT NN_1	#666666	#594a26	#AD5CCC	#350099	#992E47	318 Astro-NT NN
1019171907101540151-1	SCN	11202.2	6779	1019171907101540151-1	C57BL6J-638850.43	14980	0.831409	C57BL6J-638850	C57BL6J-638850	wt/wt	M	5.38822	8.57047	7.8		30 Astro-Epen	318 Astro-NT NN	1159 Astro-NT NN_1	5209 Astro-NT NN_1	#666666	#594a26	#AD5CCC	#350099	#4DFFA0	318 Astro-NT NN
1019171907101710054-2	SCN	12979.4	6306	1019171907101710054-2	C57BL6J-638850.43	14980	0.585716	C57BL6J-638850	C57BL6J-638850	wt/wt	M	5.67433	8.62905	7.8		30 Astro-Epen	318 Astro-NT NN	1159 Astro-NT NN_1	5209 Astro-NT NN_1	#666666	#594a26	#AD5CCC	#350099	#4DFFA0	318 Astro-NT NN
1019171907101550200-1	SCN	14044.6	6985	1019171907101550200-1	C57BL6J-638850.43	14980	0.513656	C57BL6J-638850	C57BL6J-638850	wt/wt	M	5.19569	8.42111	7.8		30 Astro-Epen	318 Astro-NT NN	1159 Astro-NT NN_1	5209 Astro-NT NN_1	#666666	#594a26	#AD5CCC	#350099	#4DFFA0	318 Astro-NT NN
1.01917e+18	SCN	9734.72	6839	1.01917e+18	C57BL6J-638850.43	14983	0.683206	C57BL6J-638850	C57BL6J-638850	wt/wt	M	5.53445	8.53746	7.8		30 Astro-Epen	318 Astro-NT NN	1159 Astro-NT NN_1	5210 Astro-NT NN_1	#666666	#594a26	#AD5CCC	#350099	#992E47	318 Astro-NT NN
1019171907101550796-1	SCN	10367.5	6557	1019171907101550796-1	C57BL6J-638850.43	14983	0.709341	C57BL6J-638850	C57BL6J-638850	wt/wt	M	5.45265	8.49799	7.8		30 Astro-Epen	318 Astro-NT NN	1159 Astro-NT NN_1	5210 Astro-NT NN_1	#666666	#594a26	#AD5CCC	#350099	#992E47	318 Astro-NT NN
1019171907101710148-2	SCN	10598.4	6788	1019171907101710148-2	C57BL6J-638850.43	14980	0.751715	C57BL6J-638850	C57BL6J-638850	wt/wt	M	5.80273	8.6278	7.8		30 Astro-Epen	318 Astro-NT NN	1159 Astro-NT NN_1	5209 Astro-NT NN_1	#666666	#594a26	#AD5CCC	#350099	#4DFFA0	318 Astro-NT NN
1.01917e+18	SCN	9670.27	6226	1.01917e+18	C57BL6J-638850.43	14980	0.623832	C57BL6J-638850	C57BL6J-638850	wt/wt	M	5.95366	8.62031	7.8		30 Astro-Epen	318 Astro-NT NN	1159 Astro-NT NN_1	5209 Astro-NT NN_1	#666666	#594a26	#AD5CCC	#350099	#4DFFA0	318 Astro-NT NN
1019171907101710223-2	SCN	10262.7	6082	1019171907101710223-2	C57BL6J-638850.43	14980	0.724639	C57BL6J-638850	C57BL6J-638850	wt/wt	M	5.92049	8.63647	7.8		30 Astro-Epen	318 Astro-NT NN	1159 Astro-NT NN_1	5209 Astro-NT NN_1	#666666	#594a26	#AD5CCC	#350099	#4DFFA0	318 Astro-NT NN
1019171907101710112-2	SCN	11097.6	6831	1019171907101710112-2	C57BL6J-638850.43	14980	0.541651	C57BL6J-638850	C57BL6J-638850	wt/wt	M	5.74735	8.6173	7.8		30 Astro-Epen	318 Astro-NT NN	1159 Astro-NT NN_1	5209 Astro-NT NN_1	#666666	#594a26	#AD5CCC	#350099	#4DFFA0	318 Astro-NT NN
1019171907101710158-2	SCN	9775.1	6114	1019171907101710158-2	C57BL6J-638850.43	14980	0.76327	C57BL6J-638850	C57BL6J-638850	wt/wt	M	5.80493	8.57721	7.8		30 Astro-Epen	318 Astro-NT NN	1159 Astro-NT NN_1	5209 Astro-NT NN_1	#666666	#594a26	#AD5CCC	#350099	#4DFFA0	318 Astro-NT NN
1.01917e+18	SCN	10439.3	6742	1.01917e+18	C57BL6J-638850.43	14983	0.712433	C57BL6J-638850	C57BL6J-638850	wt/wt	M	5.57353	8.58108	7.8		30 Astro-Epen	318 Astro-NT NN	1159 Astro-NT NN_1	5210 Astro-NT NN_1	#666666	#594a26	#AD5CCC	#350099	#992E47	318 Astro-NT NN
1.01917e+18	SCN	10790.7	7128	1.01917e+18	C57BL6J-638850.43	14983	0.70719	C57BL6J-638850	C57BL6J-638850	wt/wt	M	5.3256	8.54635	7.8		30 Astro-Epen	318 Astro-NT NN	1159 Astro-NT NN_1	5210 Astro-NT NN_1	#666666	#594a26	#AD5CCC	#350099	#992E47	318 Astro-NT NN
1.01917e+18	SCN	10589.8	6696	1.01917e+18	C57BL6J-638850.43	14980	0.760765	C57BL6J-638850	C57BL6J-638850	wt/wt	M	5.17744	8.53044	7.8		30 Astro-Epen	318 Astro-NT NN	1159 Astro-NT NN_1	5209 Astro-NT NN_1	#666666	#594a26	#AD5CCC	#350099	#4DFFA0	318 Astro-NT NN
1.01917e+18	SCN	12382.9	6349	1.01917e+18	C57BL6J-638850.43	14980	0.705423	C57BL6J-638850	C57BL6J-638850	wt/wt	M	5.90214	8.64594	7.8		30 Astro-Epen	318 Astro-NT NN	1159 Astro-NT NN_1	5209 Astro-NT NN_1	#666666	#594a26	#AD5CCC	#350099	#4DFFA0	318 Astro-NT NN
1019171907101540142-1	SCN	11040.2	6595	1019171907101540142-1	C57BL6J-638850.43	14980	0.795451	C57BL6J-638850	C57BL6J-638850	wt/wt	M	5.37957	8.60419	7.8		30 Astro-Epen	318 Astro-NT NN	1159 Astro-NT NN_1	5209 Astro-NT NN_1	#666666	#594a26	#AD5CCC	#350099	#4DFFA0	318 Astro-NT NN
1.01917e+18	SCN	13352.3	6553	1.01917e+18	C57BL6J-638850.43	14980	0.562634	C57BL6J-638850	C57BL6J-638850	wt/wt	M	5.69448	8.62885	7.8		30 Astro-Epen	318 Astro-NT NN	1159 Astro-NT NN_1	5209 Astro-NT NN_1	#666666	#594a26	#AD5CCC	#350099	#4DFFA0	318 Astro-NT NN
1019171907101710134-2	SCN	10301.4	6743	1019171907101710134-2	C57BL6J-638850.43	14980	0.797766	C57BL6J-638850	C57BL6J-638850	wt/wt	M	5.7822	8.61198	7.8		30 Astro-Epen	318 Astro-NT NN	1159 Astro-NT NN_1	5209 Astro-NT NN_1	#666666	#594a26	#AD5CCC	#350099	#4DFFA0	318 Astro-NT NN
1019171907101540256-1	SCN	14142.7	6980	1019171907101540256-1	C57BL6J-638850.43	14980	0.519625	C57BL6J-638850	C57BL6J-638850	wt/wt	M	5.56342	8.62457	7.8		30 Astro-Epen	318 Astro-NT NN	1159 Astro-NT NN_1	5209 Astro-NT NN_1	#666666	#594a26	#AD5CCC	#350099	#4DFFA0	318 Astro-NT NN
1019171907101550240-1	SCN	10584.8	6731	1019171907101550240-1	C57BL6J-638850.43	14983	0.690325	C57BL6J-638850	C57BL6J-638850	wt/wt	M	5.24454	8.5259	7.8		30 Astro-Epen	318 Astro-NT NN	1159 Astro-NT NN_1	5210 Astro-NT NN_1	#666666	#594a26	#AD5CCC	#350099	#992E47	318 Astro-NT NN
1019171907101550357-2	SCN	12509.5	7042	1019171907101550357-2	C57BL6J-638850.43	14980	0.594059	C57BL6J-638850	C57BL6J-638850	wt/wt	M	5.27194	8.38768	7.8		30 Astro-Epen	318 Astro-NT NN	1159 Astro-NT NN_1	5209 Astro-NT NN_1	#666666	#594a26	#AD5CCC	#350099	#4DFFA0	318 Astro-NT NN
1.01917e+18	SCN	12028.4	6665	1.01917e+18	C57BL6J-638850.43	14980	0.658552	C57BL6J-638850	C57BL6J-638850	wt/wt	M	5.22897	8.6092	7.8		30 Astro-Epen	318 Astro-NT NN	1159 Astro-NT NN_1	5209 Astro-NT NN_1	#666666	#594a26	#AD5CCC	#350099	#4DFFA0	318 Astro-NT NN
1019171907101540078-2	SCN	11456.2	6737	1019171907101540078-2	C57BL6J-638850.43	14980	0.789611	C57BL6J-638850	C57BL6J-638850	wt/wt	M	5.28426	8.60774	7.8		30 Astro-Epen	318 Astro-NT NN	1159 Astro-NT NN_1	5209 Astro-NT NN_1	#666666	#594a26	#AD5CCC	#350099	#4DFFA0	318 Astro-NT NN
1019171907101540076-1	SCN	11089.3	6719	1019171907101540076-1	C57BL6J-638850.43	14980	0.75903	C57BL6J-638850	C57BL6J-638850	wt/wt	M	5.28047	8.58166	7.8		30 Astro-Epen	318 Astro-NT NN	1159 Astro-NT NN_1	5209 Astro-NT NN_1	#666666	#594a26	#AD5CCC	#350099	#4DFFA0	318 Astro-NT NN
1019171907101710183-2	SCN	9755.44	6081	1019171907101710183-2	C57BL6J-638850.43	14980	0.79673	C57BL6J-638850	C57BL6J-638850	wt/wt	M	5.84884	8.54421	7.8		30 Astro-Epen	318 Astro-NT NN	1159 Astro-NT NN_1	5209 Astro-NT NN_1	#666666	#594a26	#AD5CCC	#350099	#4DFFA0	318 Astro-NT NN
1019171907101550123-3	SCN	11389.4	6875	1019171907101550123-3	C57BL6J-638850.43	14980	0.765727	C57BL6J-638850	C57BL6J-638850	wt/wt	M	5.16754	8.50379	7.8		30 Astro-Epen	318 Astro-NT NN	1159 Astro-NT NN_1	5209 Astro-NT NN_1	#666666	#594a26	#AD5CCC	#350099	#4DFFA0	318 Astro-NT NN
1019171907101710267-2	SCN	10014.4	6241	1019171907101710267-2	C57BL6J-638850.43	14980	0.720452	C57BL6J-638850	C57BL6J-638850	wt/wt	M	5.99416	8.53835	7.8		30 Astro-Epen	318 Astro-NT NN	1159 Astro-NT NN_1	5209 Astro-NT NN_1	#666666	#594a26	#AD5CCC	#350099	#4DFFA0	318 Astro-NT NN
1.01917e+18	SCN	9962.36	6590	1.01917e+18	C57BL6J-638850.43	14980	0.711797	C57BL6J-638850	C57BL6J-638850	wt/wt	M	5.34914	8.59846	7.8		30 Astro-Epen	318 Astro-NT NN	1159 Astro-NT NN_1	5209 Astro-NT NN_1	#666666	#594a26	#AD5CCC	#350099	#4DFFA0	318 Astro-NT NN
1019171907101710128-2	SCN	9928.08	6186	1019171907101710128-2	C57BL6J-638850.43	14980	0.796616	C57BL6J-638850	C57BL6J-638850	wt/wt	M	5.77245	8.61712	7.8		30 Astro-Epen	318 Astro-NT NN	1159 Astro-NT NN_1	5209 Astro-NT NN_1	#666666	#594a26	#AD5CCC	#350099	#4DFFA0	318 Astro-NT NN
1019171907101540064-2	SCN	10811.6	6778	1019171907101540064-2	C57BL6J-638850.43	14980	0.714583	C57BL6J-638850	C57BL6J-638850	wt/wt	M	5.24827	8.59161	7.8		30 Astro-Epen	318 Astro-NT NN	1159 Astro-NT NN_1	5209 Astro-NT NN_1	#666666	#594a26	#AD5CCC	#350099	#4DFFA0	318 Astro-NT NN
1019171907101540102-1	SCN	10050.5	6164	1019171907101540102-1	C57BL6J-638850.43	14980	0.6357	C57BL6J-638850	C57BL6J-638850	wt/wt	M	5.32264	8.61189	7.8		30 Astro-Epen	318 Astro-NT NN	1159 Astro-NT NN_1	5209 Astro-NT NN_1	#666666	#594a26	#AD5CCC	#350099	#4DFFA0	318 Astro-NT NN
1.01917e+18	SCN	11411.1	6832	1.01917e+18	C57BL6J-638850.43	14980	0.761839	C57BL6J-638850	C57BL6J-638850	wt/wt	M	5.38907	8.59811	7.8		30 Astro-Epen	318 Astro-NT NN	1159 Astro-NT NN_1	5209 Astro-NT NN_1	#666666	#594a26	#AD5CCC	#350099	#4DFFA0	318 Astro-NT NN
1019171907101710092-2	SCN	10554.5	6738	1019171907101710092-2	C57BL6J-638850.43	14980	0.627	C57BL6J-638850	C57BL6J-638850	wt/wt	M	5.72043	8.62774	7.8		30 Astro-Epen	318 Astro-NT NN	1159 Astro-NT NN_1	5209 Astro-NT NN_1	#666666	#594a26	#AD5CCC	#350099	#4DFFA0	318 Astro-NT NN
1019171907101540208-1	SCN	10965.3	6228	1019171907101540208-1	C57BL6J-638850.43	14980	0.565905	C57BL6J-638850	C57BL6J-638850	wt/wt	M	5.50356	8.60716	7.8		30 Astro-Epen	318 Astro-NT NN	1159 Astro-NT NN_1	5209 Astro-NT NN_1	#666666	#594a26	#AD5CCC	#350099	#4DFFA0	318 Astro-NT NN
1.01917e+18	SCN	10798.4	6250	1.01917e+18	C57BL6J-638850.43	14980	0.653217	C57BL6J-638850	C57BL6J-638850	wt/wt	M	5.49436	8.6128	7.8		30 Astro-Epen	318 Astro-NT NN	1159 Astro-NT NN_1	5209 Astro-NT NN_1	#666666	#594a26	#AD5CCC	#350099	#4DFFA0	318 Astro-NT NN
1019171907101710177-1	SCN	10300.4	7034	1019171907101710177-1	C57BL6J-638850.43	14980	0.635644	C57BL6J-638850	C57BL6J-638850	wt/wt	M	5.84621	8.56489	7.8		30 Astro-Epen	318 Astro-NT NN	1159 Astro-NT NN_1	5209 Astro-NT NN_1	#666666	#594a26	#AD5CCC	#350099	#4DFFA0	318 Astro-NT NN
1019171907101710090-3	SCN	11496.3	6660	1019171907101710090-3	C57BL6J-638850.43	5233	0.529701	C57BL6J-638850	C57BL6J-638850	wt/wt	M	5.71574	8.6178	7.8		31 OPC-Oligo	327 Oligo NN	1184 MOL NN_4	5287 MOL NN_4	#666666	#03045E	#99FFBC	#99CAFF	#5C996D	327 Oligo NN
1019171907101710105-2	SCN	10713.1	6846	1019171907101710105-2	C57BL6J-638850.43	14980	0.712994	C57BL6J-638850	C57BL6J-638850	wt/wt	M	5.73324	8.62605	7.8		30 Astro-Epen	318 Astro-NT NN	1159 Astro-NT NN_1	5209 Astro-NT NN_1	#666666	#594a26	#AD5CCC	#350099	#4DFFA0	318 Astro-NT NN
1019171907101710118-2	SCN	10469.6	6187	1019171907101710118-2	C57BL6J-638850.43	14980	0.783228	C57BL6J-638850	C57BL6J-638850	wt/wt	M	5.75907	8.61915	7.8		30 Astro-Epen	318 Astro-NT NN	1159 Astro-NT NN_1	5209 Astro-NT NN_1	#666666	#594a26	#AD5CCC	#350099	#4DFFA0	318 Astro-NT NN
1019171907101540080-2	SCN	10319.6	6601	1019171907101540080-2	C57BL6J-638850.43	14980	0.788332	C57BL6J-638850	C57BL6J-638850	wt/wt	M	5.28607	8.59229	7.8		30 Astro-Epen	318 Astro-NT NN	1159 Astro-NT NN_1	5209 Astro-NT NN_1	#666666	#594a26	#AD5CCC	#350099	#4DFFA0	318 Astro-NT NN
1019171907101710197-1	SCN	9459.25	5979	1019171907101710197-1	C57BL6J-638850.43	14980	0.794715	C57BL6J-638850	C57BL6J-638850	wt/wt	M	5.87567	8.60811	7.8		30 Astro-Epen	318 Astro-NT NN	1159 Astro-NT NN_1	5209 Astro-NT NN_1	#666666	#594a26	#AD5CCC	#350099	#4DFFA0	318 Astro-NT NN
1019171907101540048-2	SCN	12027.9	6180	1019171907101540048-2	C57BL6J-638850.43	14980	0.606579	C57BL6J-638850	C57BL6J-638850	wt/wt	M	5.21545	8.60924	7.8		30 Astro-Epen	318 Astro-NT NN	1159 Astro-NT NN_1	5209 Astro-NT NN_1	#666666	#594a26	#AD5CCC	#350099	#4DFFA0	318 Astro-NT NN
1.01917e+18	SCN	10257	6613	1.01917e+18	C57BL6J-638850.43	14980	0.708472	C57BL6J-638850	C57BL6J-638850	wt/wt	M	5.45941	8.56727	7.8		30 Astro-Epen	318 Astro-NT NN	1159 Astro-NT NN_1	5209 Astro-NT NN_1	#666666	#594a26	#AD5CCC	#350099	#4DFFA0	318 Astro-NT NN
1.01917e+18	SCN	10544.4	6925	1.01917e+18	C57BL6J-638850.43	14980	0.789311	C57BL6J-638850	C57BL6J-638850	wt/wt	M	5.29224	8.54979	7.8		30 Astro-Epen	318 Astro-NT NN	1159 Astro-NT NN_1	5209 Astro-NT NN_1	#666666	#594a26	#AD5CCC	#350099	#4DFFA0	318 Astro-NT NN
1019171907101540189-1	SCN	11008.7	6117	1019171907101540189-1	C57BL6J-638850.43	14980	0.727119	C57BL6J-638850	C57BL6J-638850	wt/wt	M	5.47037	8.60896	7.8		30 Astro-Epen	318 Astro-NT NN	1159 Astro-NT NN_1	5209 Astro-NT NN_1	#666666	#594a26	#AD5CCC	#350099	#4DFFA0	318 Astro-NT NN
1.01917e+18	SCN	10457.4	6795	1.01917e+18	C57BL6J-638850.43	14980	0.741887	C57BL6J-638850	C57BL6J-638850	wt/wt	M	5.48154	8.54682	7.8		30 Astro-Epen	318 Astro-NT NN	1159 Astro-NT NN_1	5209 Astro-NT NN_1	#666666	#594a26	#AD5CCC	#350099	#4DFFA0	318 Astro-NT NN
1.01917e+18	SCN	10610.8	6289	1.01917e+18	C57BL6J-638850.43	14980	0.794839	C57BL6J-638850	C57BL6J-638850	wt/wt	M	5.42713	8.57318	7.8		30 Astro-Epen	318 Astro-NT NN	1159 Astro-NT NN_1	5209 Astro-NT NN_1	#666666	#594a26	#AD5CCC	#350099	#4DFFA0	318 Astro-NT NN
1019171907101540273-1	SCN	11435.2	6632	1019171907101540273-1	C57BL6J-638850.43	14980	0.813532	C57BL6J-638850	C57BL6J-638850	wt/wt	M	5.58698	8.6137	7.8		30 Astro-Epen	318 Astro-NT NN	1159 Astro-NT NN_1	5209 Astro-NT NN_1	#666666	#594a26	#AD5CCC	#350099	#4DFFA0	318 Astro-NT NN
1019171907101710106-1	SCN	10035.5	6761	1019171907101710106-1	C57BL6J-638850.43	14980	0.744062	C57BL6J-638850	C57BL6J-638850	wt/wt	M	5.72199	8.55559	7.8		30 Astro-Epen	318 Astro-NT NN	1159 Astro-NT NN_1	5209 Astro-NT NN_1	#666666	#594a26	#AD5CCC	#350099	#4DFFA0	318 Astro-NT NN
1019171907101540083-2	SCN	10121.1	6155	1019171907101540083-2	C57BL6J-638850.43	14980	0.679712	C57BL6J-638850	C57BL6J-638850	wt/wt	M	5.29556	8.61153	7.8		30 Astro-Epen	318 Astro-NT NN	1159 Astro-NT NN_1	5209 Astro-NT NN_1	#666666	#594a26	#AD5CCC	#350099	#4DFFA0	318 Astro-NT NN
1019171907101550211-1	SCN	9757.31	6192	1019171907101550211-1	C57BL6J-638850.43	14956	0.647468	C57BL6J-638850	C57BL6J-638850	wt/wt	M	5.17907	8.2531	7.8		30 Astro-Epen	318 Astro-NT NN	1160 Astro-NT NN_2	5214 Astro-NT NN_2	#666666	#594a26	#AD5CCC	#1F8ECC	#2C00FF	318 Astro-NT NN
1.01917e+18	SCN	11956.4	6905	1.01917e+18	C57BL6J-638850.43	14852	0.590565	C57BL6J-638850	C57BL6J-638850	wt/wt	M	5.78098	8.44969	7.8		30 Astro-Epen	321 Astroependymal NN	1169 Astroependymal NN_1	5239 Astroependymal NN_1	#666666	#594a26	#0833ce	#00C7CC	#00CC51	321 Astroependymal NN
1.01917e+18	SCN	9397.6	6117	1.01917e+18	C57BL6J-638850.43	14956	0.60523	C57BL6J-638850	C57BL6J-638850	wt/wt	M	5.56849	8.0969	7.8		30 Astro-Epen	318 Astro-NT NN	1160 Astro-NT NN_2	5214 Astro-NT NN_2	#666666	#594a26	#AD5CCC	#1F8ECC	#2C00FF	318 Astro-NT NN
1.01917e+18	SCN	15315.9	6410	1.01917e+18	C57BL6J-638850.43	14983	0.700221	C57BL6J-638850	C57BL6J-638850	wt/wt	M	5.50204	8.00798	7.8		30 Astro-Epen	318 Astro-NT NN	1159 Astro-NT NN_1	5210 Astro-NT NN_1	#666666	#594a26	#AD5CCC	#350099	#992E47	318 Astro-NT NN
1.01917e+18	SCN	9396.71	5898	1.01917e+18	C57BL6J-638850.43	14956	0.644124	C57BL6J-638850	C57BL6J-638850	wt/wt	M	5.92675	8.08348	7.8		30 Astro-Epen	318 Astro-NT NN	1160 Astro-NT NN_2	5214 Astro-NT NN_2	#666666	#594a26	#AD5CCC	#1F8ECC	#2C00FF	318 Astro-NT NN
1.01917e+18	SCN	9741.44	6161	1.01917e+18	C57BL6J-638850.43	14983	0.63141	C57BL6J-638850	C57BL6J-638850	wt/wt	M	5.14917	8.39815	7.8		30 Astro-Epen	318 Astro-NT NN	1159 Astro-NT NN_1	5210 Astro-NT NN_1	#666666	#594a26	#AD5CCC	#350099	#992E47	318 Astro-NT NN
1019171907101730255-1	SCN	10405.5	6290	1019171907101730255-1	C57BL6J-638850.43	14956	0.587147	C57BL6J-638850	C57BL6J-638850	wt/wt	M	5.65223	7.95095	7.8		30 Astro-Epen	318 Astro-NT NN	1160 Astro-NT NN_2	5214 Astro-NT NN_2	#666666	#594a26	#AD5CCC	#1F8ECC	#2C00FF	318 Astro-NT NN
1.01917e+18	SCN	8476.83	5778	1.01917e+18	C57BL6J-638850.43	14956	0.629621	C57BL6J-638850	C57BL6J-638850	wt/wt	M	6.05422	8.41105	7.8		30 Astro-Epen	318 Astro-NT NN	1160 Astro-NT NN_2	5214 Astro-NT NN_2	#666666	#594a26	#AD5CCC	#1F8ECC	#2C00FF	318 Astro-NT NN
1019171907101730427-2	SCN	9674.7	6140	1019171907101730427-2	C57BL6J-638850.43	14956	0.702183	C57BL6J-638850	C57BL6J-638850	wt/wt	M	5.75335	7.93968	7.8		30 Astro-Epen	318 Astro-NT NN	1160 Astro-NT NN_2	5214 Astro-NT NN_2	#666666	#594a26	#AD5CCC	#1F8ECC	#2C00FF	318 Astro-NT NN
1.01917e+18	SCN	11034.2	6746	1.01917e+18	C57BL6J-638850.43	14977	0.611366	C57BL6J-638850	C57BL6J-638850	wt/wt	M	5.75447	8.35102	7.8		30 Astro-Epen	318 Astro-NT NN	1159 Astro-NT NN_1	5212 Astro-NT NN_1	#666666	#594a26	#AD5CCC	#350099	#99172A	318 Astro-NT NN
1019171907101550175-1	SCN	9729.8	6617	1019171907101550175-1	C57BL6J-638850.43	14852	0.592193	C57BL6J-638850	C57BL6J-638850	wt/wt	M	5.18435	8.43844	7.8		30 Astro-Epen	321 Astroependymal NN	1169 Astroependymal NN_1	5239 Astroependymal NN_1	#666666	#594a26	#0833ce	#00C7CC	#00CC51	321 Astroependymal NN
1019171907101550251-2	SCN	12415.5	6812	1019171907101550251-2	C57BL6J-638850.43	14852	0.51374	C57BL6J-638850	C57BL6J-638850	wt/wt	M	5.24166	8.48335	7.8		30 Astro-Epen	321 Astroependymal NN	1169 Astroependymal NN_1	5239 Astroependymal NN_1	#666666	#594a26	#0833ce	#00C7CC	#00CC51	321 Astroependymal NN
1.01917e+18	SCN	9347.94	6045	1.01917e+18	C57BL6J-638850.43	14956	0.635777	C57BL6J-638850	C57BL6J-638850	wt/wt	M	5.88185	8.27323	7.8		30 Astro-Epen	318 Astro-NT NN	1160 Astro-NT NN_2	5214 Astro-NT NN_2	#666666	#594a26	#AD5CCC	#1F8ECC	#2C00FF	318 Astro-NT NN
1.01917e+18	SCN	13991.1	6512	1.01917e+18	C57BL6J-638850.43	1427	0.60571	C57BL6J-638850	C57BL6J-638850	wt/wt	M	5.60524	8.38011	7.8	GABA	12 HY GABA	094 SCH Six6 Cdc14a Gaba	0437 SCH Six6 Cdc14a Gaba_2	1612 SCH Six6 Cdc14a Gaba_2	#FF3358	#FF6600	#FFBC4D	#66110F	#CC945C	094 SCH | Vip core
1.01917e+18	SCN	9885.77	5864	1.01917e+18	C57BL6J-638850.43	14956	0.721735	C57BL6J-638850	C57BL6J-638850	wt/wt	M	6.01033	8.08948	7.8		30 Astro-Epen	318 Astro-NT NN	1160 Astro-NT NN_2	5214 Astro-NT NN_2	#666666	#594a26	#AD5CCC	#1F8ECC	#2C00FF	318 Astro-NT NN
1019171907101720134-2	SCN	9448.09	6292	1019171907101720134-2	C57BL6J-638850.43	14852	0.650981	C57BL6J-638850	C57BL6J-638850	wt/wt	M	5.57285	8.03598	7.8		30 Astro-Epen	321 Astroependymal NN	1169 Astroependymal NN_1	5239 Astroependymal NN_1	#666666	#594a26	#0833ce	#00C7CC	#00CC51	321 Astroependymal NN
1.01917e+18	SCN	10360	6268	1.01917e+18	C57BL6J-638850.43	14852	0.594238	C57BL6J-638850	C57BL6J-638850	wt/wt	M	5.43084	8.29039	7.8		30 Astro-Epen	321 Astroependymal NN	1169 Astroependymal NN_1	5239 Astroependymal NN_1	#666666	#594a26	#0833ce	#00C7CC	#00CC51	321 Astroependymal NN
1.01917e+18	SCN	10356.7	6481	1.01917e+18	C57BL6J-638850.43	14852	0.694281	C57BL6J-638850	C57BL6J-638850	wt/wt	M	5.52948	8.48628	7.8		30 Astro-Epen	321 Astroependymal NN	1169 Astroependymal NN_1	5239 Astroependymal NN_1	#666666	#594a26	#0833ce	#00C7CC	#00CC51	321 Astroependymal NN
1019171907101730184-1	SCN	8453.63	6079	1019171907101730184-1	C57BL6J-638850.43	14956	0.56992	C57BL6J-638850	C57BL6J-638850	wt/wt	M	5.58195	7.86365	7.8		30 Astro-Epen	318 Astro-NT NN	1160 Astro-NT NN_2	5214 Astro-NT NN_2	#666666	#594a26	#AD5CCC	#1F8ECC	#2C00FF	318 Astro-NT NN
1019171907101710257-2	SCN	9867.14	6212	1019171907101710257-2	C57BL6J-638850.43	14956	0.741245	C57BL6J-638850	C57BL6J-638850	wt/wt	M	5.9707	8.45431	7.8		30 Astro-Epen	318 Astro-NT NN	1160 Astro-NT NN_2	5214 Astro-NT NN_2	#666666	#594a26	#AD5CCC	#1F8ECC	#2C00FF	318 Astro-NT NN
1.01917e+18	SCN	12475.9	7021	1.01917e+18	C57BL6J-638850.43	14852	0.559656	C57BL6J-638850	C57BL6J-638850	wt/wt	M	5.58771	8.51248	7.8		30 Astro-Epen	321 Astroependymal NN	1169 Astroependymal NN_1	5239 Astroependymal NN_1	#666666	#594a26	#0833ce	#00C7CC	#00CC51	321 Astroependymal NN
1.01917e+18	SCN	9352.14	6202	1.01917e+18	C57BL6J-638850.43	14956	0.713129	C57BL6J-638850	C57BL6J-638850	wt/wt	M	5.46248	7.85557	7.8		30 Astro-Epen	318 Astro-NT NN	1160 Astro-NT NN_2	5214 Astro-NT NN_2	#666666	#594a26	#AD5CCC	#1F8ECC	#2C00FF	318 Astro-NT NN
1.01917e+18	SCN	9359.82	6775	1.01917e+18	C57BL6J-638850.43	14852	0.641811	C57BL6J-638850	C57BL6J-638850	wt/wt	M	5.57325	8.13096	7.8		30 Astro-Epen	321 Astroependymal NN	1169 Astroependymal NN_1	5239 Astroependymal NN_1	#666666	#594a26	#0833ce	#00C7CC	#00CC51	321 Astroependymal NN
1.01917e+18	SCN	9472.57	5771	1.01917e+18	C57BL6J-638850.43	14956	0.766641	C57BL6J-638850	C57BL6J-638850	wt/wt	M	5.97574	8.16524	7.8		30 Astro-Epen	318 Astro-NT NN	1160 Astro-NT NN_2	5214 Astro-NT NN_2	#666666	#594a26	#AD5CCC	#1F8ECC	#2C00FF	318 Astro-NT NN
1019171907101730212-2	SCN	9246.17	6133	1019171907101730212-2	C57BL6J-638850.43	14956	0.64893	C57BL6J-638850	C57BL6J-638850	wt/wt	M	5.61632	7.92632	7.8		30 Astro-Epen	318 Astro-NT NN	1160 Astro-NT NN_2	5214 Astro-NT NN_2	#666666	#594a26	#AD5CCC	#1F8ECC	#2C00FF	318 Astro-NT NN
1019171907101730501-1	SCN	9102.02	6131	1019171907101730501-1	C57BL6J-638850.43	14956	0.681375	C57BL6J-638850	C57BL6J-638850	wt/wt	M	5.80823	7.94442	7.8		30 Astro-Epen	318 Astro-NT NN	1160 Astro-NT NN_2	5214 Astro-NT NN_2	#666666	#594a26	#AD5CCC	#1F8ECC	#2C00FF	318 Astro-NT NN
1019171907101730513-2	SCN	9693.57	5843	1019171907101730513-2	C57BL6J-638850.43	14956	0.757177	C57BL6J-638850	C57BL6J-638850	wt/wt	M	5.81761	7.94959	7.8		30 Astro-Epen	318 Astro-NT NN	1160 Astro-NT NN_2	5214 Astro-NT NN_2	#666666	#594a26	#AD5CCC	#1F8ECC	#2C00FF	318 Astro-NT NN
1.01917e+18	SCN	11837.5	6816	1.01917e+18	C57BL6J-638850.43	14852	0.579229	C57BL6J-638850	C57BL6J-638850	wt/wt	M	5.59079	8.05925	7.8		30 Astro-Epen	321 Astroependymal NN	1169 Astroependymal NN_1	5239 Astroependymal NN_1	#666666	#594a26	#0833ce	#00C7CC	#00CC51	321 Astroependymal NN
1.01917e+18	SCN	9503.55	5860	1.01917e+18	C57BL6J-638850.43	14956	0.693755	C57BL6J-638850	C57BL6J-638850	wt/wt	M	6.02074	8.29416	7.8		30 Astro-Epen	318 Astro-NT NN	1160 Astro-NT NN_2	5214 Astro-NT NN_2	#666666	#594a26	#AD5CCC	#1F8ECC	#2C00FF	318 Astro-NT NN
1.01917e+18	SCN	11617.6	6957	1.01917e+18	C57BL6J-638850.43	14980	0.619087	C57BL6J-638850	C57BL6J-638850	wt/wt	M	5.74184	8.41178	7.8		30 Astro-Epen	318 Astro-NT NN	1159 Astro-NT NN_1	5209 Astro-NT NN_1	#666666	#594a26	#AD5CCC	#350099	#4DFFA0	318 Astro-NT NN
1019171907101550340-2	SCN	9189.15	6275	1019171907101550340-2	C57BL6J-638850.43	14852	0.7022	C57BL6J-638850	C57BL6J-638850	wt/wt	M	5.23548	8.183	7.8		30 Astro-Epen	321 Astroependymal NN	1169 Astroependymal NN_1	5239 Astroependymal NN_1	#666666	#594a26	#0833ce	#00C7CC	#00CC51	321 Astroependymal NN
1019171907101730528-2	SCN	9009.45	5902	1019171907101730528-2	C57BL6J-638850.43	14956	0.689155	C57BL6J-638850	C57BL6J-638850	wt/wt	M	5.81602	7.876	7.8		30 Astro-Epen	318 Astro-NT NN	1160 Astro-NT NN_2	5214 Astro-NT NN_2	#666666	#594a26	#AD5CCC	#1F8ECC	#2C00FF	318 Astro-NT NN
1019171907101550137-3	SCN	10208.9	6480	1019171907101550137-3	C57BL6J-638850.43	14956	0.561568	C57BL6J-638850	C57BL6J-638850	wt/wt	M	5.13136	8.24458	7.8		30 Astro-Epen	318 Astro-NT NN	1160 Astro-NT NN_2	5214 Astro-NT NN_2	#666666	#594a26	#AD5CCC	#1F8ECC	#2C00FF	318 Astro-NT NN
1.01917e+18	SCN	9352.53	6564	1.01917e+18	C57BL6J-638850.43	14983	0.668789	C57BL6J-638850	C57BL6J-638850	wt/wt	M	5.41762	7.97551	7.8		30 Astro-Epen	318 Astro-NT NN	1159 Astro-NT NN_1	5210 Astro-NT NN_1	#666666	#594a26	#AD5CCC	#350099	#992E47	318 Astro-NT NN
1.01917e+18	SCN	9819.07	6280	1.01917e+18	C57BL6J-638850.43	14852	0.781295	C57BL6J-638850	C57BL6J-638850	wt/wt	M	5.51938	7.97108	7.8		30 Astro-Epen	321 Astroependymal NN	1169 Astroependymal NN_1	5239 Astroependymal NN_1	#666666	#594a26	#0833ce	#00C7CC	#00CC51	321 Astroependymal NN
1.01917e+18	SCN	9211.58	6640	1.01917e+18	C57BL6J-638850.43	14983	0.53851	C57BL6J-638850	C57BL6J-638850	wt/wt	M	5.60535	8.39265	7.8		30 Astro-Epen	318 Astro-NT NN	1159 Astro-NT NN_1	5210 Astro-NT NN_1	#666666	#594a26	#AD5CCC	#350099	#992E47	318 Astro-NT NN
1.01917e+18	SCN	9363.25	6308	1.01917e+18	C57BL6J-638850.43	14852	0.578444	C57BL6J-638850	C57BL6J-638850	wt/wt	M	5.61324	8.07462	7.8		30 Astro-Epen	321 Astroependymal NN	1169 Astroependymal NN_1	5239 Astroependymal NN_1	#666666	#594a26	#0833ce	#00C7CC	#00CC51	321 Astroependymal NN
1019171907101710231-2	SCN	8929.02	5854	1019171907101710231-2	C57BL6J-638850.43	14956	0.688139	C57BL6J-638850	C57BL6J-638850	wt/wt	M	5.91307	8.45331	7.8		30 Astro-Epen	318 Astro-NT NN	1160 Astro-NT NN_2	5214 Astro-NT NN_2	#666666	#594a26	#AD5CCC	#1F8ECC	#2C00FF	318 Astro-NT NN
1019171907101710313-1	SCN	10525	6945	1019171907101710313-1	C57BL6J-638850.43	14852	0.726922	C57BL6J-638850	C57BL6J-638850	wt/wt	M	6.06991	8.48347	7.8		30 Astro-Epen	321 Astroependymal NN	1169 Astroependymal NN_1	5239 Astroependymal NN_1	#666666	#594a26	#0833ce	#00C7CC	#00CC51	321 Astroependymal NN
1.01917e+18	SCN	11459.9	6896	1.01917e+18	C57BL6J-638850.43	14983	0.638719	C57BL6J-638850	C57BL6J-638850	wt/wt	M	5.64554	8.29985	7.8		30 Astro-Epen	318 Astro-NT NN	1159 Astro-NT NN_1	5210 Astro-NT NN_1	#666666	#594a26	#AD5CCC	#350099	#992E47	318 Astro-NT NN
1.01917e+18	SCN	10505.2	6552	1.01917e+18	C57BL6J-638850.43	14956	0.613549	C57BL6J-638850	C57BL6J-638850	wt/wt	M	5.84657	8.24303	7.8		30 Astro-Epen	318 Astro-NT NN	1160 Astro-NT NN_2	5214 Astro-NT NN_2	#666666	#594a26	#AD5CCC	#1F8ECC	#2C00FF	318 Astro-NT NN
1.01917e+18	SCN	9349.31	6160	1.01917e+18	C57BL6J-638850.43	14956	0.696808	C57BL6J-638850	C57BL6J-638850	wt/wt	M	6.02798	8.26285	7.8		30 Astro-Epen	318 Astro-NT NN	1160 Astro-NT NN_2	5214 Astro-NT NN_2	#666666	#594a26	#AD5CCC	#1F8ECC	#2C00FF	318 Astro-NT NN
1019171907101710133-1	SCN	10710.4	6469	1019171907101710133-1	C57BL6J-638850.43	14980	0.688635	C57BL6J-638850	C57BL6J-638850	wt/wt	M	5.76404	8.50406	7.8		30 Astro-Epen	318 Astro-NT NN	1159 Astro-NT NN_1	5209 Astro-NT NN_1	#666666	#594a26	#AD5CCC	#350099	#4DFFA0	318 Astro-NT NN
1.01917e+18	SCN	8655.42	5921	1.01917e+18	C57BL6J-638850.43	14956	0.671347	C57BL6J-638850	C57BL6J-638850	wt/wt	M	5.85023	8.12102	7.8		30 Astro-Epen	318 Astro-NT NN	1160 Astro-NT NN_2	5214 Astro-NT NN_2	#666666	#594a26	#AD5CCC	#1F8ECC	#2C00FF	318 Astro-NT NN
1.01917e+18	SCN	10431.2	6369	1.01917e+18	C57BL6J-638850.43	14852	0.603479	C57BL6J-638850	C57BL6J-638850	wt/wt	M	5.87234	8.07239	7.8		30 Astro-Epen	321 Astroependymal NN	1169 Astroependymal NN_1	5239 Astroependymal NN_1	#666666	#594a26	#0833ce	#00C7CC	#00CC51	321 Astroependymal NN
1.01917e+18	SCN	9622.37	6707	1.01917e+18	C57BL6J-638850.43	14983	0.724799	C57BL6J-638850	C57BL6J-638850	wt/wt	M	5.50444	8.36953	7.8		30 Astro-Epen	318 Astro-NT NN	1159 Astro-NT NN_1	5210 Astro-NT NN_1	#666666	#594a26	#AD5CCC	#350099	#992E47	318 Astro-NT NN
1019171907101720264-2	SCN	13231.9	6886	1019171907101720264-2	C57BL6J-638850.43	14980	0.531307	C57BL6J-638850	C57BL6J-638850	wt/wt	M	5.67955	8.40114	7.8		30 Astro-Epen	318 Astro-NT NN	1159 Astro-NT NN_1	5209 Astro-NT NN_1	#666666	#594a26	#AD5CCC	#350099	#4DFFA0	318 Astro-NT NN
1.01917e+18	SCN	9470.6	6396	1.01917e+18	C57BL6J-638850.43	14851	0.562809	C57BL6J-638850	C57BL6J-638850	wt/wt	M	5.9578	8.40499	7.8		30 Astro-Epen	319 Astro-TE NN	1163 Astro-TE NN_3	5224 Astro-TE NN_3	#666666	#594a26	#3DCCB1	#a8afa5	#0F6616	319 Astro-TE NN
1.01917e+18	SCN	8874.05	5928	1.01917e+18	C57BL6J-638850.43	14956	0.720865	C57BL6J-638850	C57BL6J-638850	wt/wt	M	5.91765	8.01716	7.8		30 Astro-Epen	318 Astro-NT NN	1160 Astro-NT NN_2	5214 Astro-NT NN_2	#666666	#594a26	#AD5CCC	#1F8ECC	#2C00FF	318 Astro-NT NN
1019171907101550265-3	SCN	9959.19	6789	1019171907101550265-3	C57BL6J-638850.43	14852	0.653221	C57BL6J-638850	C57BL6J-638850	wt/wt	M	5.20179	8.17661	7.8		30 Astro-Epen	321 Astroependymal NN	1169 Astroependymal NN_1	5239 Astroependymal NN_1	#666666	#594a26	#0833ce	#00C7CC	#00CC51	321 Astroependymal NN
1.01917e+18	SCN	10239.2	6500	1.01917e+18	C57BL6J-638850.43	14852	0.576972	C57BL6J-638850	C57BL6J-638850	wt/wt	M	5.30276	8.44863	7.8		30 Astro-Epen	321 Astroependymal NN	1169 Astroependymal NN_1	5239 Astroependymal NN_1	#666666	#594a26	#0833ce	#00C7CC	#00CC51	321 Astroependymal NN
1.01917e+18	SCN	10324	6779	1.01917e+18	C57BL6J-638850.43	14983	0.792003	C57BL6J-638850	C57BL6J-638850	wt/wt	M	5.51067	7.918	7.8		30 Astro-Epen	318 Astro-NT NN	1159 Astro-NT NN_1	5210 Astro-NT NN_1	#666666	#594a26	#AD5CCC	#350099	#992E47	318 Astro-NT NN
1.01917e+18	SCN	10427.3	6643	1.01917e+18	C57BL6J-638850.43	14956	0.745878	C57BL6J-638850	C57BL6J-638850	wt/wt	M	5.11956	8.44195	7.8		30 Astro-Epen	318 Astro-NT NN	1160 Astro-NT NN_2	5214 Astro-NT NN_2	#666666	#594a26	#AD5CCC	#1F8ECC	#2C00FF	318 Astro-NT NN
1.01917e+18	SCN	9685.99	6329	1.01917e+18	C57BL6J-638850.43	14852	0.686897	C57BL6J-638850	C57BL6J-638850	wt/wt	M	5.92024	8.45458	7.8		30 Astro-Epen	321 Astroependymal NN	1169 Astroependymal NN_1	5239 Astroependymal NN_1	#666666	#594a26	#0833ce	#00C7CC	#00CC51	321 Astroependymal NN
1.01917e+18	SCN	17260	7102	1.01917e+18	C57BL6J-638850.43	1428	0.565525	C57BL6J-638850	C57BL6J-638850	wt/wt	M	5.68053	7.98423	7.8	GABA	12 HY GABA	094 SCH Six6 Cdc14a Gaba	0436 SCH Six6 Cdc14a Gaba_1	1606 SCH Six6 Cdc14a Gaba_1	#FF3358	#FF6600	#FFBC4D	#00FF8D	#5F0066	094 SCH | Avp shell
1019171907101720196-2	SCN	14896.1	6744	1019171907101720196-2	C57BL6J-638850.43	1432	0.611576	C57BL6J-638850	C57BL6J-638850	wt/wt	M	5.61356	8.12138	7.8	GABA	12 HY GABA	094 SCH Six6 Cdc14a Gaba	0436 SCH Six6 Cdc14a Gaba_1	1608 SCH Six6 Cdc14a Gaba_1	#FF3358	#FF6600	#FFBC4D	#00FF8D	#5CCC69	094 SCH | Avp shell
1019171907101720390-1	SCN	15833.6	6842	1019171907101720390-1	C57BL6J-638850.43	1428	0.635267	C57BL6J-638850	C57BL6J-638850	wt/wt	M	5.6698	8.01256	7.8	GABA	12 HY GABA	094 SCH Six6 Cdc14a Gaba	0436 SCH Six6 Cdc14a Gaba_1	1606 SCH Six6 Cdc14a Gaba_1	#FF3358	#FF6600	#FFBC4D	#00FF8D	#5F0066	094 SCH | Avp shell
1019171907101720541-1	SCN	9996.08	6380	1019171907101720541-1	C57BL6J-638850.43	14983	0.692638	C57BL6J-638850	C57BL6J-638850	wt/wt	M	5.78744	8.35013	7.8		30 Astro-Epen	318 Astro-NT NN	1159 Astro-NT NN_1	5210 Astro-NT NN_1	#666666	#594a26	#AD5CCC	#350099	#992E47	318 Astro-NT NN
1019171907101720573-1	SCN	9693.97	6310	1019171907101720573-1	C57BL6J-638850.43	14956	0.674313	C57BL6J-638850	C57BL6J-638850	wt/wt	M	5.82956	8.43674	7.8		30 Astro-Epen	318 Astro-NT NN	1160 Astro-NT NN_2	5214 Astro-NT NN_2	#666666	#594a26	#AD5CCC	#1F8ECC	#2C00FF	318 Astro-NT NN
1019171907101720581-1	SCN	9355.61	6169	1019171907101720581-1	C57BL6J-638850.43	14852	0.677663	C57BL6J-638850	C57BL6J-638850	wt/wt	M	5.82952	8.40093	7.8		30 Astro-Epen	321 Astroependymal NN	1169 Astroependymal NN_1	5239 Astroependymal NN_1	#666666	#594a26	#0833ce	#00C7CC	#00CC51	321 Astroependymal NN
1019171907101730593-1	SCN	10031	6484	1019171907101730593-1	C57BL6J-638850.43	14956	0.682522	C57BL6J-638850	C57BL6J-638850	wt/wt	M	5.87417	7.91492	7.8		30 Astro-Epen	318 Astro-NT NN	1160 Astro-NT NN_2	5214 Astro-NT NN_2	#666666	#594a26	#AD5CCC	#1F8ECC	#2C00FF	318 Astro-NT NN
1019171907101720621-1	SCN	9780.61	6844	1019171907101720621-1	C57BL6J-638850.43	14956	0.599107	C57BL6J-638850	C57BL6J-638850	wt/wt	M	5.81458	8.11662	7.8		30 Astro-Epen	318 Astro-NT NN	1160 Astro-NT NN_2	5214 Astro-NT NN_2	#666666	#594a26	#AD5CCC	#1F8ECC	#2C00FF	318 Astro-NT NN
1.01917e+18	SCN	8723.95	5832	1.01917e+18	C57BL6J-638850.43	14956	0.64648	C57BL6J-638850	C57BL6J-638850	wt/wt	M	5.79447	7.99787	7.8		30 Astro-Epen	318 Astro-NT NN	1160 Astro-NT NN_2	5214 Astro-NT NN_2	#666666	#594a26	#AD5CCC	#1F8ECC	#2C00FF	318 Astro-NT NN
1019171907101540229-1	SCN	9389.7	6675	1019171907101540229-1	C57BL6J-638850.43	14983	0.71775	C57BL6J-638850	C57BL6J-638850	wt/wt	M	5.52089	8.52856	7.8		30 Astro-Epen	318 Astro-NT NN	1159 Astro-NT NN_1	5210 Astro-NT NN_1	#666666	#594a26	#AD5CCC	#350099	#992E47	318 Astro-NT NN
1019171907101550880-1	SCN	10044.5	6194	1019171907101550880-1	C57BL6J-638850.43	14852	0.7296	C57BL6J-638850	C57BL6J-638850	wt/wt	M	5.48851	8.38918	7.8		30 Astro-Epen	321 Astroependymal NN	1169 Astroependymal NN_1	5239 Astroependymal NN_1	#666666	#594a26	#0833ce	#00C7CC	#00CC51	321 Astroependymal NN
1019171907101720435-1	SCN	12503.9	6610	1019171907101720435-1	C57BL6J-638850.43	14852	0.507027	C57BL6J-638850	C57BL6J-638850	wt/wt	M	5.74925	8.46431	7.8		30 Astro-Epen	321 Astroependymal NN	1169 Astroependymal NN_1	5239 Astroependymal NN_1	#666666	#594a26	#0833ce	#00C7CC	#00CC51	321 Astroependymal NN
1019171907101550841-1	SCN	9777.36	6320	1019171907101550841-1	C57BL6J-638850.43	14852	0.7866	C57BL6J-638850	C57BL6J-638850	wt/wt	M	5.46944	8.41901	7.8		30 Astro-Epen	321 Astroependymal NN	1169 Astroependymal NN_1	5239 Astroependymal NN_1	#666666	#594a26	#0833ce	#00C7CC	#00CC51	321 Astroependymal NN
1.01917e+18	SCN	9967.14	6162	1.01917e+18	C57BL6J-638850.43	14983	0.766124	C57BL6J-638850	C57BL6J-638850	wt/wt	M	5.50451	8.43544	7.8		30 Astro-Epen	318 Astro-NT NN	1159 Astro-NT NN_1	5210 Astro-NT NN_1	#666666	#594a26	#AD5CCC	#350099	#992E47	318 Astro-NT NN
1.01917e+18	SCN	12954.5	6520	1.01917e+18	C57BL6J-638850.43	14983	0.625985	C57BL6J-638850	C57BL6J-638850	wt/wt	M	5.49268	8.32283	7.8		30 Astro-Epen	318 Astro-NT NN	1159 Astro-NT NN_1	5210 Astro-NT NN_1	#666666	#594a26	#AD5CCC	#350099	#992E47	318 Astro-NT NN
1.01917e+18	SCN	9639.59	6302	1.01917e+18	C57BL6J-638850.43	14852	0.708682	C57BL6J-638850	C57BL6J-638850	wt/wt	M	5.50246	8.4012	7.8		30 Astro-Epen	321 Astroependymal NN	1169 Astroependymal NN_1	5239 Astroependymal NN_1	#666666	#594a26	#0833ce	#00C7CC	#00CC51	321 Astroependymal NN
1019171907101730625-1	SCN	15710.3	6562	1019171907101730625-1	C57BL6J-638850.43	5204	0.679085	C57BL6J-638850	C57BL6J-638850	wt/wt	M	5.89841	7.92523	7.8		31 OPC-Oligo	326 OPC NN	1180 OPC NN_2	5271 OPC NN_2	#666666	#03045E	#FF26CB	#564860	#CC0097	326 OPC NN
1019171907101550157-2	SCN	14865.6	6498	1019171907101550157-2	C57BL6J-638850.43	5203	0.611666	C57BL6J-638850	C57BL6J-638850	wt/wt	M	5.13343	8.19409	7.8		31 OPC-Oligo	326 OPC NN	1179 OPC NN_1	5269 OPC NN_1	#666666	#03045E	#FF26CB	#CC0049	#5C997B	326 OPC NN
1.01917e+18	SCN	13118	6885	1.01917e+18	C57BL6J-638850.43	5204	0.667374	C57BL6J-638850	C57BL6J-638850	wt/wt	M	5.98919	8.1319	7.8		31 OPC-Oligo	326 OPC NN	1180 OPC NN_2	5271 OPC NN_2	#666666	#03045E	#FF26CB	#564860	#CC0097	326 OPC NN
1019171907101550774-1	SCN	13298.7	6881	1019171907101550774-1	C57BL6J-638850.43	5204	0.591065	C57BL6J-638850	C57BL6J-638850	wt/wt	M	5.38391	8.10863	7.8		31 OPC-Oligo	326 OPC NN	1180 OPC NN_2	5271 OPC NN_2	#666666	#03045E	#FF26CB	#564860	#CC0097	326 OPC NN
1.01917e+18	SCN	14771.5	7348	1.01917e+18	C57BL6J-638850.43	14852	0.51074	C57BL6J-638850	C57BL6J-638850	wt/wt	M	6.06502	8.37461	7.8		30 Astro-Epen	321 Astroependymal NN	1169 Astroependymal NN_1	5239 Astroependymal NN_1	#666666	#594a26	#0833ce	#00C7CC	#00CC51	321 Astroependymal NN
1.01917e+18	SCN	14008.3	6991	1.01917e+18	C57BL6J-638850.43	5204	0.673481	C57BL6J-638850	C57BL6J-638850	wt/wt	M	5.92601	8.16383	7.8		31 OPC-Oligo	326 OPC NN	1180 OPC NN_2	5271 OPC NN_2	#666666	#03045E	#FF26CB	#564860	#CC0097	326 OPC NN
1019171907101710182-2	SCN	12610.8	6825	1019171907101710182-2	C57BL6J-638850.43	5204	0.530605	C57BL6J-638850	C57BL6J-638850	wt/wt	M	5.84211	8.49368	7.8		31 OPC-Oligo	326 OPC NN	1180 OPC NN_2	5271 OPC NN_2	#666666	#03045E	#FF26CB	#564860	#CC0097	326 OPC NN
1019171907101550198-1	SCN	15055.4	6824	1019171907101550198-1	C57BL6J-638850.43	5203	0.574224	C57BL6J-638850	C57BL6J-638850	wt/wt	M	5.17422	8.30068	7.8		31 OPC-Oligo	326 OPC NN	1179 OPC NN_1	5269 OPC NN_1	#666666	#03045E	#FF26CB	#CC0049	#5C997B	326 OPC NN
1019171907101540040-1	SCN	12316.4	6778	1019171907101540040-1	C57BL6J-638850.43	5204	0.585229	C57BL6J-638850	C57BL6J-638850	wt/wt	M	5.1888	8.55446	7.8		31 OPC-Oligo	326 OPC NN	1180 OPC NN_2	5271 OPC NN_2	#666666	#03045E	#FF26CB	#564860	#CC0097	326 OPC NN
1.01917e+18	SCN	16951.6	6477	1.01917e+18	C57BL6J-638850.43	5207	0.707977	C57BL6J-638850	C57BL6J-638850	wt/wt	M	5.81684	8.06276	7.8		31 OPC-Oligo	326 OPC NN	1179 OPC NN_1	5270 OPC NN_1	#666666	#03045E	#FF26CB	#CC0049	#2E9988	326 OPC NN
1.01917e+18	SCN	13121.1	6797	1.01917e+18	C57BL6J-638850.43	5204	0.665356	C57BL6J-638850	C57BL6J-638850	wt/wt	M	6.04064	8.2249	7.8		31 OPC-Oligo	326 OPC NN	1180 OPC NN_2	5271 OPC NN_2	#666666	#03045E	#FF26CB	#564860	#CC0097	326 OPC NN
1019171907101730119-2	SCN	12706.2	6632	1019171907101730119-2	C57BL6J-638850.43	5203	0.672625	C57BL6J-638850	C57BL6J-638850	wt/wt	M	5.55063	7.95421	7.8		31 OPC-Oligo	326 OPC NN	1179 OPC NN_1	5269 OPC NN_1	#666666	#03045E	#FF26CB	#CC0049	#5C997B	326 OPC NN
1.01917e+18	SCN	14372.2	6698	1.01917e+18	C57BL6J-638850.43	5203	0.594621	C57BL6J-638850	C57BL6J-638850	wt/wt	M	5.83661	8.19493	7.8		31 OPC-Oligo	326 OPC NN	1179 OPC NN_1	5269 OPC NN_1	#666666	#03045E	#FF26CB	#CC0049	#5C997B	326 OPC NN
1.01917e+18	SCN	13896.8	6730	1.01917e+18	C57BL6J-638850.43	5204	0.550504	C57BL6J-638850	C57BL6J-638850	wt/wt	M	5.81949	8.25679	7.8		31 OPC-Oligo	326 OPC NN	1180 OPC NN_2	5271 OPC NN_2	#666666	#03045E	#FF26CB	#564860	#CC0097	326 OPC NN
1019171907101720619-1	SCN	12656.8	6769	1019171907101720619-1	C57BL6J-638850.43	5204	0.546094	C57BL6J-638850	C57BL6J-638850	wt/wt	M	5.84413	8.30521	7.8		31 OPC-Oligo	326 OPC NN	1180 OPC NN_2	5271 OPC NN_2	#666666	#03045E	#FF26CB	#564860	#CC0097	326 OPC NN
1019171907101550766-1	SCN	13291.6	6394	1019171907101550766-1	C57BL6J-638850.43	5204	0.615058	C57BL6J-638850	C57BL6J-638850	wt/wt	M	5.39097	8.19815	7.8		31 OPC-Oligo	326 OPC NN	1180 OPC NN_2	5271 OPC NN_2	#666666	#03045E	#FF26CB	#564860	#CC0097	326 OPC NN
1.01917e+18	SCN	12417.2	6733	1.01917e+18	C57BL6J-638850.43	5204	0.661175	C57BL6J-638850	C57BL6J-638850	wt/wt	M	5.42712	7.8962	7.8		31 OPC-Oligo	326 OPC NN	1180 OPC NN_2	5271 OPC NN_2	#666666	#03045E	#FF26CB	#564860	#CC0097	326 OPC NN
1.01917e+18	SCN	13508.7	6911	1.01917e+18	C57BL6J-638850.43	5204	0.68102	C57BL6J-638850	C57BL6J-638850	wt/wt	M	5.68322	8.00544	7.8		31 OPC-Oligo	326 OPC NN	1180 OPC NN_2	5271 OPC NN_2	#666666	#03045E	#FF26CB	#564860	#CC0097	326 OPC NN
1.01917e+18	SCN	12683.9	6786	1.01917e+18	C57BL6J-638850.43	5204	0.619527	C57BL6J-638850	C57BL6J-638850	wt/wt	M	5.89716	8.02975	7.8		31 OPC-Oligo	326 OPC NN	1180 OPC NN_2	5271 OPC NN_2	#666666	#03045E	#FF26CB	#564860	#CC0097	326 OPC NN
1.01917e+18	SCN	13488.5	6931	1.01917e+18	C57BL6J-638850.43	5204	0.65326	C57BL6J-638850	C57BL6J-638850	wt/wt	M	5.94678	8.41612	7.8		31 OPC-Oligo	326 OPC NN	1180 OPC NN_2	5271 OPC NN_2	#666666	#03045E	#FF26CB	#564860	#CC0097	326 OPC NN
1019171907101540059-1	SCN	15028.4	7011	1019171907101540059-1	C57BL6J-638850.43	5204	0.686523	C57BL6J-638850	C57BL6J-638850	wt/wt	M	5.23251	8.60066	7.8		31 OPC-Oligo	326 OPC NN	1180 OPC NN_2	5271 OPC NN_2	#666666	#03045E	#FF26CB	#564860	#CC0097	326 OPC NN
1019171907101890050-1	SCN	16374.8	6520	1019171907101890050-1	C57BL6J-638850.43	5207	0.534706	C57BL6J-638850	C57BL6J-638850	wt/wt	M	6.09321	8.34346	7.8		31 OPC-Oligo	326 OPC NN	1179 OPC NN_1	5270 OPC NN_1	#666666	#03045E	#FF26CB	#CC0049	#2E9988	326 OPC NN
1019171907101550295-3	SCN	13359	6807	1019171907101550295-3	C57BL6J-638850.43	5204	0.592051	C57BL6J-638850	C57BL6J-638850	wt/wt	M	5.20234	8.08304	7.8		31 OPC-Oligo	326 OPC NN	1180 OPC NN_2	5271 OPC NN_2	#666666	#03045E	#FF26CB	#564860	#CC0097	326 OPC NN
1019171907101720290-1	SCN	14245.2	7146	1019171907101720290-1	C57BL6J-638850.43	1427	0.523423	C57BL6J-638850	C57BL6J-638850	wt/wt	M	5.66653	8.24421	7.8	GABA	12 HY GABA	094 SCH Six6 Cdc14a Gaba	0437 SCH Six6 Cdc14a Gaba_2	1612 SCH Six6 Cdc14a Gaba_2	#FF3358	#FF6600	#FFBC4D	#66110F	#CC945C	094 SCH | Sst, Cd24a
1019171907101710067-3	SCN	14363.1	7015	1019171907101710067-3	C57BL6J-638850.43	5204	0.631219	C57BL6J-638850	C57BL6J-638850	wt/wt	M	5.68246	8.61366	7.8		31 OPC-Oligo	326 OPC NN	1180 OPC NN_2	5271 OPC NN_2	#666666	#03045E	#FF26CB	#564860	#CC0097	326 OPC NN
1019171907101540193-1	SCN	13081.6	6463	1019171907101540193-1	C57BL6J-638850.43	5204	0.665421	C57BL6J-638850	C57BL6J-638850	wt/wt	M	5.4588	8.49138	7.8		31 OPC-Oligo	326 OPC NN	1180 OPC NN_2	5271 OPC NN_2	#666666	#03045E	#FF26CB	#564860	#CC0097	326 OPC NN
1019171907101550523-1	SCN	13253.4	6982	1019171907101550523-1	C57BL6J-638850.43	5204	0.559469	C57BL6J-638850	C57BL6J-638850	wt/wt	M	5.28056	8.07802	7.8		31 OPC-Oligo	326 OPC NN	1180 OPC NN_2	5271 OPC NN_2	#666666	#03045E	#FF26CB	#564860	#CC0097	326 OPC NN
1.01917e+18	SCN	13612.9	6622	1.01917e+18	C57BL6J-638850.43	5211	0.573842	C57BL6J-638850	C57BL6J-638850	wt/wt	M	5.21077	8.41187	7.8		31 OPC-Oligo	327 Oligo NN	1181 COP NN_1	5272 COP NN_1	#666666	#03045E	#99FFBC	#609945	#662E56	327 Oligo NN
1.01917e+18	SCN	12798.2	6771	1.01917e+18	C57BL6J-638850.43	5212	0.655314	C57BL6J-638850	C57BL6J-638850	wt/wt	M	5.72009	8.21739	7.8		31 OPC-Oligo	327 Oligo NN	1181 COP NN_1	5273 COP NN_1	#666666	#03045E	#99FFBC	#609945	#CC915C	327 Oligo NN
1.01917e+18	SCN	12376.4	6774	1.01917e+18	C57BL6J-638850.43	5212	0.694875	C57BL6J-638850	C57BL6J-638850	wt/wt	M	5.89916	8.32041	7.8		31 OPC-Oligo	327 Oligo NN	1181 COP NN_1	5273 COP NN_1	#666666	#03045E	#99FFBC	#609945	#CC915C	327 Oligo NN
1.01917e+18	SCN	12012.5	6743	1.01917e+18	C57BL6J-638850.43	5212	0.703769	C57BL6J-638850	C57BL6J-638850	wt/wt	M	5.89367	8.32534	7.8		31 OPC-Oligo	327 Oligo NN	1181 COP NN_1	5273 COP NN_1	#666666	#03045E	#99FFBC	#609945	#CC915C	327 Oligo NN
1019171907101710130-1	SCN	9323.76	6398	1019171907101710130-1	C57BL6J-638850.43	5213	0.639647	C57BL6J-638850	C57BL6J-638850	wt/wt	M	5.76984	8.5917	7.8		31 OPC-Oligo	327 Oligo NN	1181 COP NN_1	5274 COP NN_1	#666666	#03045E	#99FFBC	#609945	#6ACC3D	327 Oligo NN
1.01917e+18	SCN	12487.3	6730	1.01917e+18	C57BL6J-638850.43	5213	0.63876	C57BL6J-638850	C57BL6J-638850	wt/wt	M	5.6841	7.91572	7.8		31 OPC-Oligo	327 Oligo NN	1181 COP NN_1	5274 COP NN_1	#666666	#03045E	#99FFBC	#609945	#6ACC3D	327 Oligo NN
1019171907101540046-1	SCN	11602.6	6649	1019171907101540046-1	C57BL6J-638850.43	5213	0.750418	C57BL6J-638850	C57BL6J-638850	wt/wt	M	5.20657	8.59434	7.8		31 OPC-Oligo	327 Oligo NN	1181 COP NN_1	5274 COP NN_1	#666666	#03045E	#99FFBC	#609945	#6ACC3D	327 Oligo NN
1019171907101540084-2	SCN	11578.8	6626	1019171907101540084-2	C57BL6J-638850.43	5213	0.754238	C57BL6J-638850	C57BL6J-638850	wt/wt	M	5.29082	8.57796	7.8		31 OPC-Oligo	327 Oligo NN	1181 COP NN_1	5274 COP NN_1	#666666	#03045E	#99FFBC	#609945	#6ACC3D	327 Oligo NN
1019171907101540170-1	SCN	12500	6604	1019171907101540170-1	C57BL6J-638850.43	5218	0.7048	C57BL6J-638850	C57BL6J-638850	wt/wt	M	5.42845	8.60562	7.8		31 OPC-Oligo	327 Oligo NN	1182 NFOL NN_2	5279 NFOL NN_2	#666666	#03045E	#99FFBC	#371FCC	#FF73A1	327 Oligo NN
1.01917e+18	SCN	12191.3	6589	1.01917e+18	C57BL6J-638850.43	5220	0.755124	C57BL6J-638850	C57BL6J-638850	wt/wt	M	5.77228	7.99095	7.8		31 OPC-Oligo	327 Oligo NN	1182 NFOL NN_2	5280 NFOL NN_2	#666666	#03045E	#99FFBC	#371FCC	#455699	327 Oligo NN
1.01917e+18	SCN	11358	5805	1.01917e+18	C57BL6J-638850.43	5230	0.663434	C57BL6J-638850	C57BL6J-638850	wt/wt	M	5.97514	8.58176	7.8		31 OPC-Oligo	327 Oligo NN	1184 MOL NN_4	5284 MOL NN_4	#666666	#03045E	#99FFBC	#99CAFF	#5B2E66	327 Oligo NN
1019171907101540062-1	SCN	10830.9	5820	1019171907101540062-1	C57BL6J-638850.43	5230	0.626519	C57BL6J-638850	C57BL6J-638850	wt/wt	M	5.24098	8.57673	7.8		31 OPC-Oligo	327 Oligo NN	1184 MOL NN_4	5284 MOL NN_4	#666666	#03045E	#99FFBC	#99CAFF	#5B2E66	327 Oligo NN
1019171907101540125-1	SCN	11745.5	6293	1019171907101540125-1	C57BL6J-638850.43	5230	0.741132	C57BL6J-638850	C57BL6J-638850	wt/wt	M	5.35237	8.58748	7.8		31 OPC-Oligo	327 Oligo NN	1184 MOL NN_4	5284 MOL NN_4	#666666	#03045E	#99FFBC	#99CAFF	#5B2E66	327 Oligo NN
1.01917e+18	SCN	11488.5	6016	1.01917e+18	C57BL6J-638850.43	5230	0.740641	C57BL6J-638850	C57BL6J-638850	wt/wt	M	5.35438	8.57832	7.8		31 OPC-Oligo	327 Oligo NN	1184 MOL NN_4	5284 MOL NN_4	#666666	#03045E	#99FFBC	#99CAFF	#5B2E66	327 Oligo NN
1.01917e+18	SCN	11401.7	6214	1.01917e+18	C57BL6J-638850.43	5230	0.77724	C57BL6J-638850	C57BL6J-638850	wt/wt	M	5.46002	8.58671	7.8		31 OPC-Oligo	327 Oligo NN	1184 MOL NN_4	5284 MOL NN_4	#666666	#03045E	#99FFBC	#99CAFF	#5B2E66	327 Oligo NN
1.01917e+18	SCN	10800.9	5590	1.01917e+18	C57BL6J-638850.43	5230	0.629758	C57BL6J-638850	C57BL6J-638850	wt/wt	M	5.51292	8.57986	7.8		31 OPC-Oligo	327 Oligo NN	1184 MOL NN_4	5284 MOL NN_4	#666666	#03045E	#99FFBC	#99CAFF	#5B2E66	327 Oligo NN
1019171907101540243-1	SCN	12107.4	6089	1019171907101540243-1	C57BL6J-638850.43	5230	0.745826	C57BL6J-638850	C57BL6J-638850	wt/wt	M	5.5476	8.59612	7.8		31 OPC-Oligo	327 Oligo NN	1184 MOL NN_4	5284 MOL NN_4	#666666	#03045E	#99FFBC	#99CAFF	#5B2E66	327 Oligo NN
1019171907101550298-3	SCN	11072.8	5609	1019171907101550298-3	C57BL6J-638850.43	5231	0.541178	C57BL6J-638850	C57BL6J-638850	wt/wt	M	5.21928	8.19478	7.8		31 OPC-Oligo	327 Oligo NN	1184 MOL NN_4	5285 MOL NN_4	#666666	#03045E	#99FFBC	#99CAFF	#5A662E	327 Oligo NN
1019171907101710036-3	SCN	12390.5	6082	1019171907101710036-3	C57BL6J-638850.43	5230	0.6174	C57BL6J-638850	C57BL6J-638850	wt/wt	M	5.64044	8.61863	7.8		31 OPC-Oligo	327 Oligo NN	1184 MOL NN_4	5284 MOL NN_4	#666666	#03045E	#99FFBC	#99CAFF	#5B2E66	327 Oligo NN
1019171907101710068-3	SCN	12028.7	6169	1019171907101710068-3	C57BL6J-638850.43	5230	0.622683	C57BL6J-638850	C57BL6J-638850	wt/wt	M	5.68386	8.62161	7.8		31 OPC-Oligo	327 Oligo NN	1184 MOL NN_4	5284 MOL NN_4	#666666	#03045E	#99FFBC	#99CAFF	#5B2E66	327 Oligo NN
1.01917e+18	SCN	11611.1	6082	1.01917e+18	C57BL6J-638850.43	5230	0.674501	C57BL6J-638850	C57BL6J-638850	wt/wt	M	5.75212	8.52826	7.8		31 OPC-Oligo	327 Oligo NN	1184 MOL NN_4	5284 MOL NN_4	#666666	#03045E	#99FFBC	#99CAFF	#5B2E66	327 Oligo NN
1019171907101710200-1	SCN	11132.5	5828	1019171907101710200-1	C57BL6J-638850.43	5230	0.687859	C57BL6J-638850	C57BL6J-638850	wt/wt	M	5.88192	8.58548	7.8		31 OPC-Oligo	327 Oligo NN	1184 MOL NN_4	5284 MOL NN_4	#666666	#03045E	#99FFBC	#99CAFF	#5B2E66	327 Oligo NN
1019171907101710206-2	SCN	11647.9	6281	1019171907101710206-2	C57BL6J-638850.43	5230	0.765648	C57BL6J-638850	C57BL6J-638850	wt/wt	M	5.87837	8.55036	7.8		31 OPC-Oligo	327 Oligo NN	1184 MOL NN_4	5284 MOL NN_4	#666666	#03045E	#99FFBC	#99CAFF	#5B2E66	327 Oligo NN
1019171907101710208-2	SCN	12381.4	6188	1019171907101710208-2	C57BL6J-638850.43	5230	0.753278	C57BL6J-638850	C57BL6J-638850	wt/wt	M	5.87659	8.49453	7.8		31 OPC-Oligo	327 Oligo NN	1184 MOL NN_4	5284 MOL NN_4	#666666	#03045E	#99FFBC	#99CAFF	#5B2E66	327 Oligo NN
1019171907101710218-2	SCN	11091.7	6199	1019171907101710218-2	C57BL6J-638850.43	5230	0.713113	C57BL6J-638850	C57BL6J-638850	wt/wt	M	5.91276	8.59002	7.8		31 OPC-Oligo	327 Oligo NN	1184 MOL NN_4	5284 MOL NN_4	#666666	#03045E	#99FFBC	#99CAFF	#5B2E66	327 Oligo NN
1019171907101710222-2	SCN	11660.4	6034	1019171907101710222-2	C57BL6J-638850.43	5230	0.820163	C57BL6J-638850	C57BL6J-638850	wt/wt	M	5.91812	8.60876	7.8		31 OPC-Oligo	327 Oligo NN	1184 MOL NN_4	5284 MOL NN_4	#666666	#03045E	#99FFBC	#99CAFF	#5B2E66	327 Oligo NN
1.01917e+18	SCN	10679.5	6146	1.01917e+18	C57BL6J-638850.43	5230	0.726766	C57BL6J-638850	C57BL6J-638850	wt/wt	M	5.95479	8.5994	7.8		31 OPC-Oligo	327 Oligo NN	1184 MOL NN_4	5284 MOL NN_4	#666666	#03045E	#99FFBC	#99CAFF	#5B2E66	327 Oligo NN
1019171907101710239-1	SCN	10936	5893	1019171907101710239-1	C57BL6J-638850.43	5230	0.75286	C57BL6J-638850	C57BL6J-638850	wt/wt	M	5.96389	8.61807	7.8		31 OPC-Oligo	327 Oligo NN	1184 MOL NN_4	5284 MOL NN_4	#666666	#03045E	#99FFBC	#99CAFF	#5B2E66	327 Oligo NN
1019171907101710240-2	SCN	10790.8	5862	1019171907101710240-2	C57BL6J-638850.43	5230	0.660567	C57BL6J-638850	C57BL6J-638850	wt/wt	M	5.94738	8.53494	7.8		31 OPC-Oligo	327 Oligo NN	1184 MOL NN_4	5284 MOL NN_4	#666666	#03045E	#99FFBC	#99CAFF	#5B2E66	327 Oligo NN
1019171907101710246-1	SCN	11423.7	6191	1019171907101710246-1	C57BL6J-638850.43	5230	0.734401	C57BL6J-638850	C57BL6J-638850	wt/wt	M	5.96407	8.58082	7.8		31 OPC-Oligo	327 Oligo NN	1184 MOL NN_4	5284 MOL NN_4	#666666	#03045E	#99FFBC	#99CAFF	#5B2E66	327 Oligo NN
1019171907101710282-2	SCN	11674.8	6229	1019171907101710282-2	C57BL6J-638850.43	5230	0.638846	C57BL6J-638850	C57BL6J-638850	wt/wt	M	6.03345	8.53284	7.8		31 OPC-Oligo	327 Oligo NN	1184 MOL NN_4	5284 MOL NN_4	#666666	#03045E	#99FFBC	#99CAFF	#5B2E66	327 Oligo NN
1019171907101710254-1	SCN	11568.4	6194	1019171907101710254-1	C57BL6J-638850.43	5230	0.7819	C57BL6J-638850	C57BL6J-638850	wt/wt	M	5.9853	8.61252	7.8		31 OPC-Oligo	327 Oligo NN	1184 MOL NN_4	5284 MOL NN_4	#666666	#03045E	#99FFBC	#99CAFF	#5B2E66	327 Oligo NN
1019171907101540036-2	SCN	11788.7	6238	1019171907101540036-2	C57BL6J-638850.43	5230	0.642551	C57BL6J-638850	C57BL6J-638850	wt/wt	M	5.184	8.58295	7.8		31 OPC-Oligo	327 Oligo NN	1184 MOL NN_4	5284 MOL NN_4	#666666	#03045E	#99FFBC	#99CAFF	#5B2E66	327 Oligo NN
1.01917e+18	SCN	12272.5	6186	1.01917e+18	C57BL6J-638850.43	5230	0.71425	C57BL6J-638850	C57BL6J-638850	wt/wt	M	5.37025	8.5855	7.8		31 OPC-Oligo	327 Oligo NN	1184 MOL NN_4	5284 MOL NN_4	#666666	#03045E	#99FFBC	#99CAFF	#5B2E66	327 Oligo NN
1019171907101540231-1	SCN	12199.3	6149	1019171907101540231-1	C57BL6J-638850.43	5230	0.752099	C57BL6J-638850	C57BL6J-638850	wt/wt	M	5.54125	8.60434	7.8		31 OPC-Oligo	327 Oligo NN	1184 MOL NN_4	5284 MOL NN_4	#666666	#03045E	#99FFBC	#99CAFF	#5B2E66	327 Oligo NN
1019171907201540088-1	SCN	11649.7	6074	1019171907201540088-1	C57BL6J-638850.43	5230	0.80347	C57BL6J-638850	C57BL6J-638850	wt/wt	M	5.31204	8.58504	7.8		31 OPC-Oligo	327 Oligo NN	1184 MOL NN_4	5284 MOL NN_4	#666666	#03045E	#99FFBC	#99CAFF	#5B2E66	327 Oligo NN
1.01917e+18	SCN	12052.7	6160	1.01917e+18	C57BL6J-638850.43	5230	0.747204	C57BL6J-638850	C57BL6J-638850	wt/wt	M	5.74218	8.59391	7.8		31 OPC-Oligo	327 Oligo NN	1184 MOL NN_4	5284 MOL NN_4	#666666	#03045E	#99FFBC	#99CAFF	#5B2E66	327 Oligo NN
1019171907101710185-1	SCN	10905.4	6127	1019171907101710185-1	C57BL6J-638850.43	5230	0.747983	C57BL6J-638850	C57BL6J-638850	wt/wt	M	5.86378	8.62749	7.8		31 OPC-Oligo	327 Oligo NN	1184 MOL NN_4	5284 MOL NN_4	#666666	#03045E	#99FFBC	#99CAFF	#5B2E66	327 Oligo NN
1.01917e+18	SCN	11314.8	5614	1.01917e+18	C57BL6J-638850.43	5230	0.634477	C57BL6J-638850	C57BL6J-638850	wt/wt	M	5.93818	8.26244	7.8		31 OPC-Oligo	327 Oligo NN	1184 MOL NN_4	5284 MOL NN_4	#666666	#03045E	#99FFBC	#99CAFF	#5B2E66	327 Oligo NN
1019171907101540052-2	SCN	12450	6205	1019171907101540052-2	C57BL6J-638850.43	5230	0.773192	C57BL6J-638850	C57BL6J-638850	wt/wt	M	5.21781	8.60056	7.8		31 OPC-Oligo	327 Oligo NN	1184 MOL NN_4	5284 MOL NN_4	#666666	#03045E	#99FFBC	#99CAFF	#5B2E66	327 Oligo NN
1019171907101540096-1	SCN	10920.1	6256	1019171907101540096-1	C57BL6J-638850.43	5230	0.673138	C57BL6J-638850	C57BL6J-638850	wt/wt	M	5.30803	8.60003	7.8		31 OPC-Oligo	327 Oligo NN	1184 MOL NN_4	5284 MOL NN_4	#666666	#03045E	#99FFBC	#99CAFF	#5B2E66	327 Oligo NN
1019171907101540197-1	SCN	12458.7	6245	1019171907101540197-1	C57BL6J-638850.43	5230	0.700589	C57BL6J-638850	C57BL6J-638850	wt/wt	M	5.47052	8.51309	7.8		31 OPC-Oligo	327 Oligo NN	1184 MOL NN_4	5284 MOL NN_4	#666666	#03045E	#99FFBC	#99CAFF	#5B2E66	327 Oligo NN
1.01917e+18	SCN	11523.8	5742	1.01917e+18	C57BL6J-638850.43	5230	0.708346	C57BL6J-638850	C57BL6J-638850	wt/wt	M	5.51401	8.60914	7.8		31 OPC-Oligo	327 Oligo NN	1184 MOL NN_4	5284 MOL NN_4	#666666	#03045E	#99FFBC	#99CAFF	#5B2E66	327 Oligo NN
1.01917e+18	SCN	11400.9	5820	1.01917e+18	C57BL6J-638850.43	5230	0.672221	C57BL6J-638850	C57BL6J-638850	wt/wt	M	5.57364	8.61517	7.8		31 OPC-Oligo	327 Oligo NN	1184 MOL NN_4	5284 MOL NN_4	#666666	#03045E	#99FFBC	#99CAFF	#5B2E66	327 Oligo NN
1.01917e+18	SCN	12012.3	6336	1.01917e+18	C57BL6J-638850.43	5230	0.771139	C57BL6J-638850	C57BL6J-638850	wt/wt	M	5.29922	8.60084	7.8		31 OPC-Oligo	327 Oligo NN	1184 MOL NN_4	5284 MOL NN_4	#666666	#03045E	#99FFBC	#99CAFF	#5B2E66	327 Oligo NN
1019171907101710070-2	SCN	10422.2	5385	1019171907101710070-2	C57BL6J-638850.43	5230	0.766736	C57BL6J-638850	C57BL6J-638850	wt/wt	M	5.68278	8.56544	7.8		31 OPC-Oligo	327 Oligo NN	1184 MOL NN_4	5284 MOL NN_4	#666666	#03045E	#99FFBC	#99CAFF	#5B2E66	327 Oligo NN
1019171907101710210-1	SCN	11453.5	6013	1019171907101710210-1	C57BL6J-638850.43	5230	0.78251	C57BL6J-638850	C57BL6J-638850	wt/wt	M	5.88752	8.54458	7.8		31 OPC-Oligo	327 Oligo NN	1184 MOL NN_4	5284 MOL NN_4	#666666	#03045E	#99FFBC	#99CAFF	#5B2E66	327 Oligo NN
1019171907101710281-1	SCN	11952.1	6277	1019171907101710281-1	C57BL6J-638850.43	5230	0.82499	C57BL6J-638850	C57BL6J-638850	wt/wt	M	6.02132	8.49936	7.8		31 OPC-Oligo	327 Oligo NN	1184 MOL NN_4	5284 MOL NN_4	#666666	#03045E	#99FFBC	#99CAFF	#5B2E66	327 Oligo NN
1.01917e+18	SCN	11011.1	5878	1.01917e+18	C57BL6J-638850.43	5230	0.532851	C57BL6J-638850	C57BL6J-638850	wt/wt	M	5.96569	8.12237	7.8		31 OPC-Oligo	327 Oligo NN	1184 MOL NN_4	5284 MOL NN_4	#666666	#03045E	#99FFBC	#99CAFF	#5B2E66	327 Oligo NN
1.01917e+18	SCN	12080.1	6151	1.01917e+18	C57BL6J-638850.43	5230	0.759673	C57BL6J-638850	C57BL6J-638850	wt/wt	M	5.52737	8.6072	7.8		31 OPC-Oligo	327 Oligo NN	1184 MOL NN_4	5284 MOL NN_4	#666666	#03045E	#99FFBC	#99CAFF	#5B2E66	327 Oligo NN
1019171907101540145-1	SCN	11321.8	6228	1019171907101540145-1	C57BL6J-638850.43	5230	0.638029	C57BL6J-638850	C57BL6J-638850	wt/wt	M	5.37934	8.5893	7.8		31 OPC-Oligo	327 Oligo NN	1184 MOL NN_4	5284 MOL NN_4	#666666	#03045E	#99FFBC	#99CAFF	#5B2E66	327 Oligo NN
1.01917e+18	SCN	11961.3	6298	1.01917e+18	C57BL6J-638850.43	5230	0.680559	C57BL6J-638850	C57BL6J-638850	wt/wt	M	5.44558	8.59307	7.8		31 OPC-Oligo	327 Oligo NN	1184 MOL NN_4	5284 MOL NN_4	#666666	#03045E	#99FFBC	#99CAFF	#5B2E66	327 Oligo NN
1.01917e+18	SCN	12270.2	6169	1.01917e+18	C57BL6J-638850.43	5230	0.744143	C57BL6J-638850	C57BL6J-638850	wt/wt	M	5.48533	8.5921	7.8		31 OPC-Oligo	327 Oligo NN	1184 MOL NN_4	5284 MOL NN_4	#666666	#03045E	#99FFBC	#99CAFF	#5B2E66	327 Oligo NN
1019171907101540217-1	SCN	10772.1	5815	1019171907101540217-1	C57BL6J-638850.43	5231	0.770682	C57BL6J-638850	C57BL6J-638850	wt/wt	M	5.50538	8.53131	7.8		31 OPC-Oligo	327 Oligo NN	1184 MOL NN_4	5285 MOL NN_4	#666666	#03045E	#99FFBC	#99CAFF	#5A662E	327 Oligo NN
1019171907101540230-1	SCN	11893.5	6343	1019171907101540230-1	C57BL6J-638850.43	5230	0.669587	C57BL6J-638850	C57BL6J-638850	wt/wt	M	5.5279	8.55372	7.8		31 OPC-Oligo	327 Oligo NN	1184 MOL NN_4	5284 MOL NN_4	#666666	#03045E	#99FFBC	#99CAFF	#5B2E66	327 Oligo NN
1019171907101550120-1	SCN	10861.6	5558	1019171907101550120-1	C57BL6J-638850.43	5231	0.664457	C57BL6J-638850	C57BL6J-638850	wt/wt	M	5.12675	8.25194	7.8		31 OPC-Oligo	327 Oligo NN	1184 MOL NN_4	5285 MOL NN_4	#666666	#03045E	#99FFBC	#99CAFF	#5A662E	327 Oligo NN
1019171907101540131-1	SCN	10993.4	6428	1019171907101540131-1	C57BL6J-638850.43	5230	0.673857	C57BL6J-638850	C57BL6J-638850	wt/wt	M	5.36222	8.6115	7.8		31 OPC-Oligo	327 Oligo NN	1184 MOL NN_4	5284 MOL NN_4	#666666	#03045E	#99FFBC	#99CAFF	#5B2E66	327 Oligo NN
1019171907101540068-1	SCN	11631.4	6026	1019171907101540068-1	C57BL6J-638850.43	5230	0.612618	C57BL6J-638850	C57BL6J-638850	wt/wt	M	5.25463	8.57473	7.8		31 OPC-Oligo	327 Oligo NN	1184 MOL NN_4	5284 MOL NN_4	#666666	#03045E	#99FFBC	#99CAFF	#5B2E66	327 Oligo NN
1019171907101540070-2	SCN	10837.7	5809	1019171907101540070-2	C57BL6J-638850.43	5230	0.759132	C57BL6J-638850	C57BL6J-638850	wt/wt	M	5.26264	8.5558	7.8		31 OPC-Oligo	327 Oligo NN	1184 MOL NN_4	5284 MOL NN_4	#666666	#03045E	#99FFBC	#99CAFF	#5B2E66	327 Oligo NN
1019171907101710078-2	SCN	11342.7	6090	1019171907101710078-2	C57BL6J-638850.43	5230	0.64446	C57BL6J-638850	C57BL6J-638850	wt/wt	M	5.69943	8.61653	7.8		31 OPC-Oligo	327 Oligo NN	1184 MOL NN_4	5284 MOL NN_4	#666666	#03045E	#99FFBC	#99CAFF	#5B2E66	327 Oligo NN
1019171907101710127-1	SCN	11416.2	6075	1019171907101710127-1	C57BL6J-638850.43	5230	0.740386	C57BL6J-638850	C57BL6J-638850	wt/wt	M	5.76446	8.55611	7.8		31 OPC-Oligo	327 Oligo NN	1184 MOL NN_4	5284 MOL NN_4	#666666	#03045E	#99FFBC	#99CAFF	#5B2E66	327 Oligo NN
1019171907101710221-1	SCN	11967.9	6195	1019171907101710221-1	C57BL6J-638850.43	5230	0.796591	C57BL6J-638850	C57BL6J-638850	wt/wt	M	5.90581	8.5253	7.8		31 OPC-Oligo	327 Oligo NN	1184 MOL NN_4	5284 MOL NN_4	#666666	#03045E	#99FFBC	#99CAFF	#5B2E66	327 Oligo NN
1019171907101710233-1	SCN	11454.3	6048	1019171907101710233-1	C57BL6J-638850.43	5230	0.577311	C57BL6J-638850	C57BL6J-638850	wt/wt	M	5.9481	8.62383	7.8		31 OPC-Oligo	327 Oligo NN	1184 MOL NN_4	5284 MOL NN_4	#666666	#03045E	#99FFBC	#99CAFF	#5B2E66	327 Oligo NN
1019171907101540138-1	SCN	11559	6199	1019171907101540138-1	C57BL6J-638850.43	5230	0.596511	C57BL6J-638850	C57BL6J-638850	wt/wt	M	5.37061	8.61081	7.8		31 OPC-Oligo	327 Oligo NN	1184 MOL NN_4	5284 MOL NN_4	#666666	#03045E	#99FFBC	#99CAFF	#5B2E66	327 Oligo NN
1019171907101540091-1	SCN	11129.8	5831	1019171907101540091-1	C57BL6J-638850.43	5230	0.754844	C57BL6J-638850	C57BL6J-638850	wt/wt	M	5.29225	8.53685	7.8		31 OPC-Oligo	327 Oligo NN	1184 MOL NN_4	5284 MOL NN_4	#666666	#03045E	#99FFBC	#99CAFF	#5B2E66	327 Oligo NN
1019171907101890041-1	SCN	10535.1	5478	1019171907101890041-1	C57BL6J-638850.43	5231	0.604066	C57BL6J-638850	C57BL6J-638850	wt/wt	M	6.06908	8.23238	7.8		31 OPC-Oligo	327 Oligo NN	1184 MOL NN_4	5285 MOL NN_4	#666666	#03045E	#99FFBC	#99CAFF	#5A662E	327 Oligo NN
1019171907101540132-1	SCN	10929.5	5565	1019171907101540132-1	C57BL6J-638850.43	5230	0.659194	C57BL6J-638850	C57BL6J-638850	wt/wt	M	5.36245	8.59448	7.8		31 OPC-Oligo	327 Oligo NN	1184 MOL NN_4	5284 MOL NN_4	#666666	#03045E	#99FFBC	#99CAFF	#5B2E66	327 Oligo NN
1019171907101710220-2	SCN	11765	6316	1019171907101710220-2	C57BL6J-638850.43	5230	0.718573	C57BL6J-638850	C57BL6J-638850	wt/wt	M	5.90999	8.55058	7.8		31 OPC-Oligo	327 Oligo NN	1184 MOL NN_4	5284 MOL NN_4	#666666	#03045E	#99FFBC	#99CAFF	#5B2E66	327 Oligo NN
1019171907101710191-2	SCN	11148.3	6121	1019171907101710191-2	C57BL6J-638850.43	5230	0.773833	C57BL6J-638850	C57BL6J-638850	wt/wt	M	5.8635	8.56091	7.8		31 OPC-Oligo	327 Oligo NN	1184 MOL NN_4	5284 MOL NN_4	#666666	#03045E	#99FFBC	#99CAFF	#5B2E66	327 Oligo NN
1.01917e+18	SCN	10767.8	5730	1.01917e+18	C57BL6J-638850.43	5230	0.754	C57BL6J-638850	C57BL6J-638850	wt/wt	M	5.87629	8.62398	7.8		31 OPC-Oligo	327 Oligo NN	1184 MOL NN_4	5284 MOL NN_4	#666666	#03045E	#99FFBC	#99CAFF	#5B2E66	327 Oligo NN
1019171907101550763-1	SCN	9918.7	6222	1019171907101550763-1	C57BL6J-638850.43	5231	0.754838	C57BL6J-638850	C57BL6J-638850	wt/wt	M	5.43298	8.47386	7.8		31 OPC-Oligo	327 Oligo NN	1184 MOL NN_4	5285 MOL NN_4	#666666	#03045E	#99FFBC	#99CAFF	#5A662E	327 Oligo NN
1019171907101550248-2	SCN	11137.6	6141	1019171907101550248-2	C57BL6J-638850.43	5230	0.508311	C57BL6J-638850	C57BL6J-638850	wt/wt	M	5.17917	8.08111	7.8		31 OPC-Oligo	327 Oligo NN	1184 MOL NN_4	5284 MOL NN_4	#666666	#03045E	#99FFBC	#99CAFF	#5B2E66	327 Oligo NN
1.01917e+18	SCN	11230.7	6294	1.01917e+18	C57BL6J-638850.43	5231	0.592318	C57BL6J-638850	C57BL6J-638850	wt/wt	M	5.9667	8.27058	7.8		31 OPC-Oligo	327 Oligo NN	1184 MOL NN_4	5285 MOL NN_4	#666666	#03045E	#99FFBC	#99CAFF	#5A662E	327 Oligo NN
1019171907101710260-1	SCN	10781.8	5519	1019171907101710260-1	C57BL6J-638850.43	5231	0.693969	C57BL6J-638850	C57BL6J-638850	wt/wt	M	5.98015	8.49546	7.8		31 OPC-Oligo	327 Oligo NN	1184 MOL NN_4	5285 MOL NN_4	#666666	#03045E	#99FFBC	#99CAFF	#5A662E	327 Oligo NN
1019171907101710144-1	SCN	10670.7	5557	1019171907101710144-1	C57BL6J-638850.43	5231	0.669366	C57BL6J-638850	C57BL6J-638850	wt/wt	M	5.77969	8.51867	7.8		31 OPC-Oligo	327 Oligo NN	1184 MOL NN_4	5285 MOL NN_4	#666666	#03045E	#99FFBC	#99CAFF	#5A662E	327 Oligo NN
1.01917e+18	SCN	10444.2	5889	1.01917e+18	C57BL6J-638850.43	5231	0.635909	C57BL6J-638850	C57BL6J-638850	wt/wt	M	6.01154	8.21457	7.8		31 OPC-Oligo	327 Oligo NN	1184 MOL NN_4	5285 MOL NN_4	#666666	#03045E	#99FFBC	#99CAFF	#5A662E	327 Oligo NN
1019171907101550171-2	SCN	10014.5	6049	1019171907101550171-2	C57BL6J-638850.43	5231	0.711789	C57BL6J-638850	C57BL6J-638850	wt/wt	M	5.19792	8.53849	7.8		31 OPC-Oligo	327 Oligo NN	1184 MOL NN_4	5285 MOL NN_4	#666666	#03045E	#99FFBC	#99CAFF	#5A662E	327 Oligo NN
1.01917e+18	SCN	10110.7	6424	1.01917e+18	C57BL6J-638850.43	5231	0.689281	C57BL6J-638850	C57BL6J-638850	wt/wt	M	5.84421	8.2033	7.8		31 OPC-Oligo	327 Oligo NN	1184 MOL NN_4	5285 MOL NN_4	#666666	#03045E	#99FFBC	#99CAFF	#5A662E	327 Oligo NN
1019171907101730156-2	SCN	10627.5	6355	1019171907101730156-2	C57BL6J-638850.43	5231	0.71863	C57BL6J-638850	C57BL6J-638850	wt/wt	M	5.56964	7.88986	7.8		31 OPC-Oligo	327 Oligo NN	1184 MOL NN_4	5285 MOL NN_4	#666666	#03045E	#99FFBC	#99CAFF	#5A662E	327 Oligo NN
1019171907101550876-1	SCN	10775.9	6028	1019171907101550876-1	C57BL6J-638850.43	5231	0.780313	C57BL6J-638850	C57BL6J-638850	wt/wt	M	5.49077	8.42242	7.8		31 OPC-Oligo	327 Oligo NN	1184 MOL NN_4	5285 MOL NN_4	#666666	#03045E	#99FFBC	#99CAFF	#5A662E	327 Oligo NN
1.01917e+18	SCN	10901.3	6519	1.01917e+18	C57BL6J-638850.43	5231	0.641426	C57BL6J-638850	C57BL6J-638850	wt/wt	M	5.16754	8.36314	7.8		31 OPC-Oligo	327 Oligo NN	1184 MOL NN_4	5285 MOL NN_4	#666666	#03045E	#99FFBC	#99CAFF	#5A662E	327 Oligo NN
1019171907101550682-1	SCN	10291.5	6523	1019171907101550682-1	C57BL6J-638850.43	5231	0.664873	C57BL6J-638850	C57BL6J-638850	wt/wt	M	5.34893	8.13937	7.8		31 OPC-Oligo	327 Oligo NN	1184 MOL NN_4	5285 MOL NN_4	#666666	#03045E	#99FFBC	#99CAFF	#5A662E	327 Oligo NN
1019171907101710212-2	SCN	7953.04	5596	1019171907101710212-2	C57BL6J-638850.43	5231	0.690228	C57BL6J-638850	C57BL6J-638850	wt/wt	M	5.90632	8.62508	7.8		31 OPC-Oligo	327 Oligo NN	1184 MOL NN_4	5285 MOL NN_4	#666666	#03045E	#99FFBC	#99CAFF	#5A662E	327 Oligo NN
1.01917e+18	SCN	11412.7	6640	1.01917e+18	C57BL6J-638850.43	5231	0.688805	C57BL6J-638850	C57BL6J-638850	wt/wt	M	5.90288	7.99483	7.8		31 OPC-Oligo	327 Oligo NN	1184 MOL NN_4	5285 MOL NN_4	#666666	#03045E	#99FFBC	#99CAFF	#5A662E	327 Oligo NN
1.01917e+18	SCN	11023	5615	1.01917e+18	C57BL6J-638850.43	5231	0.638977	C57BL6J-638850	C57BL6J-638850	wt/wt	M	5.9602	8.20725	7.8		31 OPC-Oligo	327 Oligo NN	1184 MOL NN_4	5285 MOL NN_4	#666666	#03045E	#99FFBC	#99CAFF	#5A662E	327 Oligo NN
1.01917e+18	SCN	11085.4	6297	1.01917e+18	C57BL6J-638850.43	5231	0.537989	C57BL6J-638850	C57BL6J-638850	wt/wt	M	6.07216	8.38802	7.8		31 OPC-Oligo	327 Oligo NN	1184 MOL NN_4	5285 MOL NN_4	#666666	#03045E	#99FFBC	#99CAFF	#5A662E	327 Oligo NN
1.01917e+18	SCN	15610.7	6904	1.01917e+18	C57BL6J-638850.43	5231	0.510257	C57BL6J-638850	C57BL6J-638850	wt/wt	M	5.73984	8.17026	7.8		31 OPC-Oligo	327 Oligo NN	1184 MOL NN_4	5285 MOL NN_4	#666666	#03045E	#99FFBC	#99CAFF	#5A662E	327 Oligo NN
1.01917e+18	SCN	10894.7	6488	1.01917e+18	C57BL6J-638850.43	5231	0.676784	C57BL6J-638850	C57BL6J-638850	wt/wt	M	5.94171	8.36421	7.8		31 OPC-Oligo	327 Oligo NN	1184 MOL NN_4	5285 MOL NN_4	#666666	#03045E	#99FFBC	#99CAFF	#5A662E	327 Oligo NN
1.01917e+18	SCN	10938.3	5935	1.01917e+18	C57BL6J-638850.43	5231	0.550425	C57BL6J-638850	C57BL6J-638850	wt/wt	M	5.95211	7.98067	7.8		31 OPC-Oligo	327 Oligo NN	1184 MOL NN_4	5285 MOL NN_4	#666666	#03045E	#99FFBC	#99CAFF	#5A662E	327 Oligo NN
1.01917e+18	SCN	10381.6	6224	1.01917e+18	C57BL6J-638850.43	5231	0.584602	C57BL6J-638850	C57BL6J-638850	wt/wt	M	5.99935	8.17969	7.8		31 OPC-Oligo	327 Oligo NN	1184 MOL NN_4	5285 MOL NN_4	#666666	#03045E	#99FFBC	#99CAFF	#5A662E	327 Oligo NN
1.01917e+18	SCN	10601.8	5524	1.01917e+18	C57BL6J-638850.43	5231	0.629316	C57BL6J-638850	C57BL6J-638850	wt/wt	M	6.02461	8.05852	7.8		31 OPC-Oligo	327 Oligo NN	1184 MOL NN_4	5285 MOL NN_4	#666666	#03045E	#99FFBC	#99CAFF	#5A662E	327 Oligo NN
1019171907101550106-3	SCN	10597.7	5527	1019171907101550106-3	C57BL6J-638850.43	5231	0.552775	C57BL6J-638850	C57BL6J-638850	wt/wt	M	5.12246	8.29956	7.8		31 OPC-Oligo	327 Oligo NN	1184 MOL NN_4	5285 MOL NN_4	#666666	#03045E	#99FFBC	#99CAFF	#5A662E	327 Oligo NN
1.01917e+18	SCN	11093.4	6336	1.01917e+18	C57BL6J-638850.43	5231	0.710739	C57BL6J-638850	C57BL6J-638850	wt/wt	M	5.63563	8.58602	7.8		31 OPC-Oligo	327 Oligo NN	1184 MOL NN_4	5285 MOL NN_4	#666666	#03045E	#99FFBC	#99CAFF	#5A662E	327 Oligo NN
1019171907101710228-2	SCN	10015.5	6392	1019171907101710228-2	C57BL6J-638850.43	14930	0.511678	C57BL6J-638850	C57BL6J-638850	wt/wt	M	5.93361	8.59366	7.8		30 Astro-Epen	319 Astro-TE NN	1161 Astro-TE NN_1	5219 Astro-TE NN_1	#666666	#594a26	#3DCCB1	#FFB173	#C3CC7A	319 Astro-TE NN
1019171907101710302-2	SCN	10591.2	6372	1019171907101710302-2	C57BL6J-638850.43	5231	0.67429	C57BL6J-638850	C57BL6J-638850	wt/wt	M	6.04802	8.49106	7.8		31 OPC-Oligo	327 Oligo NN	1184 MOL NN_4	5285 MOL NN_4	#666666	#03045E	#99FFBC	#99CAFF	#5A662E	327 Oligo NN
1019171907101720479-1	SCN	10550.2	5649	1019171907101720479-1	C57BL6J-638850.43	5231	0.597764	C57BL6J-638850	C57BL6J-638850	wt/wt	M	5.76911	8.44559	7.8		31 OPC-Oligo	327 Oligo NN	1184 MOL NN_4	5285 MOL NN_4	#666666	#03045E	#99FFBC	#99CAFF	#5A662E	327 Oligo NN
1.01917e+18	SCN	9287.22	6280	1.01917e+18	C57BL6J-638850.43	5231	0.614072	C57BL6J-638850	C57BL6J-638850	wt/wt	M	5.87646	8.22336	7.8		31 OPC-Oligo	327 Oligo NN	1184 MOL NN_4	5285 MOL NN_4	#666666	#03045E	#99FFBC	#99CAFF	#5A662E	327 Oligo NN
1019171907101540250-1	SCN	10313.8	6066	1019171907101540250-1	C57BL6J-638850.43	5231	0.74482	C57BL6J-638850	C57BL6J-638850	wt/wt	M	5.56199	8.61472	7.8		31 OPC-Oligo	327 Oligo NN	1184 MOL NN_4	5285 MOL NN_4	#666666	#03045E	#99FFBC	#99CAFF	#5A662E	327 Oligo NN
1.01917e+18	SCN	11185.8	6380	1.01917e+18	C57BL6J-638850.43	5231	0.590015	C57BL6J-638850	C57BL6J-638850	wt/wt	M	5.48356	8.61434	7.8		31 OPC-Oligo	327 Oligo NN	1184 MOL NN_4	5285 MOL NN_4	#666666	#03045E	#99FFBC	#99CAFF	#5A662E	327 Oligo NN
1.01917e+18	SCN	10087.7	6043	1.01917e+18	C57BL6J-638850.43	14956	0.727077	C57BL6J-638850	C57BL6J-638850	wt/wt	M	5.91904	8.18539	7.8		30 Astro-Epen	318 Astro-NT NN	1160 Astro-NT NN_2	5214 Astro-NT NN_2	#666666	#594a26	#AD5CCC	#1F8ECC	#2C00FF	318 Astro-NT NN
1019171907101550199-2	SCN	15157.5	6858	1019171907101550199-2	C57BL6J-638850.43	1427	0.526911	C57BL6J-638850	C57BL6J-638850	wt/wt	M	5.19814	8.43328	7.8	GABA	12 HY GABA	094 SCH Six6 Cdc14a Gaba	0437 SCH Six6 Cdc14a Gaba_2	1612 SCH Six6 Cdc14a Gaba_2	#FF3358	#FF6600	#FFBC4D	#66110F	#CC945C	094 SCH | Vip core
1019171907101550827-1	SCN	9002.74	6221	1019171907101550827-1	C57BL6J-638850.43	14852	0.723385	C57BL6J-638850	C57BL6J-638850	wt/wt	M	5.4532	8.39435	7.8		30 Astro-Epen	321 Astroependymal NN	1169 Astroependymal NN_1	5239 Astroependymal NN_1	#666666	#594a26	#0833ce	#00C7CC	#00CC51	321 Astroependymal NN
1.01917e+18	SCN	12754	6827	1.01917e+18	C57BL6J-638850.43	14852	0.568949	C57BL6J-638850	C57BL6J-638850	wt/wt	M	5.46178	7.997	7.8		30 Astro-Epen	321 Astroependymal NN	1169 Astroependymal NN_1	5239 Astroependymal NN_1	#666666	#594a26	#0833ce	#00C7CC	#00CC51	321 Astroependymal NN
1019171907101560417-2	SCN	9931.64	6844	1019171907101560417-2	C57BL6J-638850.43	14956	0.713064	C57BL6J-638850	C57BL6J-638850	wt/wt	M	5.33073	8.02212	7.8		30 Astro-Epen	318 Astro-NT NN	1160 Astro-NT NN_2	5214 Astro-NT NN_2	#666666	#594a26	#AD5CCC	#1F8ECC	#2C00FF	318 Astro-NT NN
1019171907101560564-1	SCN	16742.2	7039	1019171907101560564-1	C57BL6J-638850.43	1428	0.594785	C57BL6J-638850	C57BL6J-638850	wt/wt	M	5.39357	7.89869	7.8	GABA	12 HY GABA	094 SCH Six6 Cdc14a Gaba	0436 SCH Six6 Cdc14a Gaba_1	1606 SCH Six6 Cdc14a Gaba_1	#FF3358	#FF6600	#FFBC4D	#00FF8D	#5F0066	094 SCH | Avp shell
1.01917e+18	SCN	13349.1	6895	1.01917e+18	C57BL6J-638850.43	14852	0.546832	C57BL6J-638850	C57BL6J-638850	wt/wt	M	5.65448	8.03993	7.8		30 Astro-Epen	321 Astroependymal NN	1169 Astroependymal NN_1	5239 Astroependymal NN_1	#666666	#594a26	#0833ce	#00C7CC	#00CC51	321 Astroependymal NN
1.01917e+18	SCN	9121.09	5886	1.01917e+18	C57BL6J-638850.43	14956	0.622223	C57BL6J-638850	C57BL6J-638850	wt/wt	M	5.90554	8.37136	7.8		30 Astro-Epen	318 Astro-NT NN	1160 Astro-NT NN_2	5214 Astro-NT NN_2	#666666	#594a26	#AD5CCC	#1F8ECC	#2C00FF	318 Astro-NT NN
1.01917e+18	SCN	9542.05	6518	1.01917e+18	C57BL6J-638850.43	14956	0.72509	C57BL6J-638850	C57BL6J-638850	wt/wt	M	5.92473	8.17598	7.8		30 Astro-Epen	318 Astro-NT NN	1160 Astro-NT NN_2	5214 Astro-NT NN_2	#666666	#594a26	#AD5CCC	#1F8ECC	#2C00FF	318 Astro-NT NN
1019171907101710059-2	SCN	10668.7	6739	1019171907101710059-2	C57BL6J-638850.43	14983	0.656961	C57BL6J-638850	C57BL6J-638850	wt/wt	M	5.66699	8.55402	7.8		30 Astro-Epen	318 Astro-NT NN	1159 Astro-NT NN_1	5210 Astro-NT NN_1	#666666	#594a26	#AD5CCC	#350099	#992E47	318 Astro-NT NN
1019171907101710089-1	SCN	10389.1	6920	1019171907101710089-1	C57BL6J-638850.43	14980	0.535718	C57BL6J-638850	C57BL6J-638850	wt/wt	M	5.69227	8.47213	7.8		30 Astro-Epen	318 Astro-NT NN	1159 Astro-NT NN_1	5209 Astro-NT NN_1	#666666	#594a26	#AD5CCC	#350099	#4DFFA0	318 Astro-NT NN
1019171907101710189-1	SCN	9603.76	6561	1019171907101710189-1	C57BL6J-638850.43	14983	0.793102	C57BL6J-638850	C57BL6J-638850	wt/wt	M	5.85858	8.52814	7.8		30 Astro-Epen	318 Astro-NT NN	1159 Astro-NT NN_1	5210 Astro-NT NN_1	#666666	#594a26	#AD5CCC	#350099	#992E47	318 Astro-NT NN
1019171907101720093-1	SCN	8975.28	6091	1019171907101720093-1	C57BL6J-638850.43	14956	0.558976	C57BL6J-638850	C57BL6J-638850	wt/wt	M	5.55554	8.07257	7.8		30 Astro-Epen	318 Astro-NT NN	1160 Astro-NT NN_2	5214 Astro-NT NN_2	#666666	#594a26	#AD5CCC	#1F8ECC	#2C00FF	318 Astro-NT NN
1019171907101720586-1	SCN	9972.72	6360	1019171907101720586-1	C57BL6J-638850.43	14956	0.704983	C57BL6J-638850	C57BL6J-638850	wt/wt	M	5.80577	8.21653	7.8		30 Astro-Epen	318 Astro-NT NN	1160 Astro-NT NN_2	5214 Astro-NT NN_2	#666666	#594a26	#AD5CCC	#1F8ECC	#2C00FF	318 Astro-NT NN
1019171907101720607-1	SCN	9169.17	6040	1019171907101720607-1	C57BL6J-638850.43	14956	0.698656	C57BL6J-638850	C57BL6J-638850	wt/wt	M	5.81314	8.17727	7.8		30 Astro-Epen	318 Astro-NT NN	1160 Astro-NT NN_2	5214 Astro-NT NN_2	#666666	#594a26	#AD5CCC	#1F8ECC	#2C00FF	318 Astro-NT NN
1.01917e+18	SCN	9291.5	6299	1.01917e+18	C57BL6J-638850.43	14956	0.721307	C57BL6J-638850	C57BL6J-638850	wt/wt	M	5.84624	8.34371	7.8		30 Astro-Epen	318 Astro-NT NN	1160 Astro-NT NN_2	5214 Astro-NT NN_2	#666666	#594a26	#AD5CCC	#1F8ECC	#2C00FF	318 Astro-NT NN
1019171907101550143-2	SCN	9909.27	5800	1019171907101550143-2	C57BL6J-638850.43	14956	0.726636	C57BL6J-638850	C57BL6J-638850	wt/wt	M	5.12797	8.17578	7.8		30 Astro-Epen	318 Astro-NT NN	1160 Astro-NT NN_2	5214 Astro-NT NN_2	#666666	#594a26	#AD5CCC	#1F8ECC	#2C00FF	318 Astro-NT NN
1019171907101720611-1	SCN	8803.78	6199	1019171907101720611-1	C57BL6J-638850.43	14852	0.642677	C57BL6J-638850	C57BL6J-638850	wt/wt	M	5.85991	8.42874	7.8		30 Astro-Epen	321 Astroependymal NN	1169 Astroependymal NN_1	5239 Astroependymal NN_1	#666666	#594a26	#0833ce	#00C7CC	#00CC51	321 Astroependymal NN
1.01917e+18	SCN	10355.2	6928	1.01917e+18	C57BL6J-638850.43	14983	0.711082	C57BL6J-638850	C57BL6J-638850	wt/wt	M	5.48231	8.51613	7.8		30 Astro-Epen	318 Astro-NT NN	1159 Astro-NT NN_1	5210 Astro-NT NN_1	#666666	#594a26	#AD5CCC	#350099	#992E47	318 Astro-NT NN
1019171907101550244-3	SCN	9923.02	6609	1019171907101550244-3	C57BL6J-638850.43	14852	0.650499	C57BL6J-638850	C57BL6J-638850	wt/wt	M	5.19843	8.20934	7.8		30 Astro-Epen	321 Astroependymal NN	1169 Astroependymal NN_1	5239 Astroependymal NN_1	#666666	#594a26	#0833ce	#00C7CC	#00CC51	321 Astroependymal NN
1019171907101550552-2	SCN	11257.6	6962	1019171907101550552-2	C57BL6J-638850.43	14983	0.607636	C57BL6J-638850	C57BL6J-638850	wt/wt	M	5.34945	8.44955	7.8		30 Astro-Epen	318 Astro-NT NN	1159 Astro-NT NN_1	5210 Astro-NT NN_1	#666666	#594a26	#AD5CCC	#350099	#992E47	318 Astro-NT NN
1.01917e+18	SCN	10900.1	6674	1.01917e+18	C57BL6J-638850.43	14956	0.62425	C57BL6J-638850	C57BL6J-638850	wt/wt	M	5.52278	8.41363	7.8		30 Astro-Epen	318 Astro-NT NN	1160 Astro-NT NN_2	5214 Astro-NT NN_2	#666666	#594a26	#AD5CCC	#1F8ECC	#2C00FF	318 Astro-NT NN
1.01917e+18	SCN	9523.84	6249	1.01917e+18	C57BL6J-638850.43	14852	0.592478	C57BL6J-638850	C57BL6J-638850	wt/wt	M	5.51094	8.2079	7.8		30 Astro-Epen	321 Astroependymal NN	1169 Astroependymal NN_1	5239 Astroependymal NN_1	#666666	#594a26	#0833ce	#00C7CC	#00CC51	321 Astroependymal NN
1019171907101560543-1	SCN	9630.59	6252	1019171907101560543-1	C57BL6J-638850.43	14852	0.681642	C57BL6J-638850	C57BL6J-638850	wt/wt	M	5.38953	7.91867	7.8		30 Astro-Epen	321 Astroependymal NN	1169 Astroependymal NN_1	5239 Astroependymal NN_1	#666666	#594a26	#0833ce	#00C7CC	#00CC51	321 Astroependymal NN
1019171907101710251-2	SCN	10186.2	6708	1019171907101710251-2	C57BL6J-638850.43	14956	0.660758	C57BL6J-638850	C57BL6J-638850	wt/wt	M	5.95417	8.4427	7.8		30 Astro-Epen	318 Astro-NT NN	1160 Astro-NT NN_2	5214 Astro-NT NN_2	#666666	#594a26	#AD5CCC	#1F8ECC	#2C00FF	318 Astro-NT NN
1019171907101710291-2	SCN	10572.1	6651	1019171907101710291-2	C57BL6J-638850.43	14983	0.740641	C57BL6J-638850	C57BL6J-638850	wt/wt	M	6.03456	8.49355	7.8		30 Astro-Epen	318 Astro-NT NN	1159 Astro-NT NN_1	5210 Astro-NT NN_1	#666666	#594a26	#AD5CCC	#350099	#992E47	318 Astro-NT NN
1019171907101720151-1	SCN	10045.1	6403	1019171907101720151-1	C57BL6J-638850.43	14956	0.649841	C57BL6J-638850	C57BL6J-638850	wt/wt	M	5.6099	8.20227	7.8		30 Astro-Epen	318 Astro-NT NN	1160 Astro-NT NN_2	5214 Astro-NT NN_2	#666666	#594a26	#AD5CCC	#1F8ECC	#2C00FF	318 Astro-NT NN
1019171907101720261-1	SCN	11428.6	6956	1019171907101720261-1	C57BL6J-638850.43	14980	0.649923	C57BL6J-638850	C57BL6J-638850	wt/wt	M	5.6541	8.24663	7.8		30 Astro-Epen	318 Astro-NT NN	1159 Astro-NT NN_1	5209 Astro-NT NN_1	#666666	#594a26	#AD5CCC	#350099	#4DFFA0	318 Astro-NT NN
1019171907101720510-1	SCN	9865.81	6823	1019171907101720510-1	C57BL6J-638850.43	14956	0.638647	C57BL6J-638850	C57BL6J-638850	wt/wt	M	5.73953	8.15314	7.8		30 Astro-Epen	318 Astro-NT NN	1160 Astro-NT NN_2	5214 Astro-NT NN_2	#666666	#594a26	#AD5CCC	#1F8ECC	#2C00FF	318 Astro-NT NN
1019171907101720550-1	SCN	9218.88	6231	1019171907101720550-1	C57BL6J-638850.43	14852	0.674266	C57BL6J-638850	C57BL6J-638850	wt/wt	M	5.81158	8.43288	7.8		30 Astro-Epen	321 Astroependymal NN	1169 Astroependymal NN_1	5239 Astroependymal NN_1	#666666	#594a26	#0833ce	#00C7CC	#00CC51	321 Astroependymal NN
1019171907101550122-1	SCN	8933.1	6037	1019171907101550122-1	C57BL6J-638850.43	14956	0.659624	C57BL6J-638850	C57BL6J-638850	wt/wt	M	5.13739	8.31335	7.8		30 Astro-Epen	318 Astro-NT NN	1160 Astro-NT NN_2	5214 Astro-NT NN_2	#666666	#594a26	#AD5CCC	#1F8ECC	#2C00FF	318 Astro-NT NN
1019171907101550168-3	SCN	11371.3	6797	1019171907101550168-3	C57BL6J-638850.43	14852	0.523466	C57BL6J-638850	C57BL6J-638850	wt/wt	M	5.18281	8.47265	7.8		30 Astro-Epen	321 Astroependymal NN	1169 Astroependymal NN_1	5239 Astroependymal NN_1	#666666	#594a26	#0833ce	#00C7CC	#00CC51	321 Astroependymal NN
1019171907101550215-2	SCN	9774.4	6779	1019171907101550215-2	C57BL6J-638850.43	14983	0.71784	C57BL6J-638850	C57BL6J-638850	wt/wt	M	5.20377	8.40674	7.8		30 Astro-Epen	318 Astro-NT NN	1159 Astro-NT NN_1	5210 Astro-NT NN_1	#666666	#594a26	#AD5CCC	#350099	#992E47	318 Astro-NT NN
1019171907101550883-1	SCN	9086.28	6531	1019171907101550883-1	C57BL6J-638850.43	14852	0.722221	C57BL6J-638850	C57BL6J-638850	wt/wt	M	5.48751	8.37534	7.8		30 Astro-Epen	321 Astroependymal NN	1169 Astroependymal NN_1	5239 Astroependymal NN_1	#666666	#594a26	#0833ce	#00C7CC	#00CC51	321 Astroependymal NN
1.01917e+18	SCN	9481.25	6697	1.01917e+18	C57BL6J-638850.43	14852	0.728322	C57BL6J-638850	C57BL6J-638850	wt/wt	M	5.52326	8.35092	7.8		30 Astro-Epen	321 Astroependymal NN	1169 Astroependymal NN_1	5239 Astroependymal NN_1	#666666	#594a26	#0833ce	#00C7CC	#00CC51	321 Astroependymal NN
1.01917e+18	SCN	10904.5	7125	1.01917e+18	C57BL6J-638850.43	14852	0.587972	C57BL6J-638850	C57BL6J-638850	wt/wt	M	5.54202	8.28856	7.8		30 Astro-Epen	321 Astroependymal NN	1169 Astroependymal NN_1	5239 Astroependymal NN_1	#666666	#594a26	#0833ce	#00C7CC	#00CC51	321 Astroependymal NN
1019171907101710196-1	SCN	8351.38	5946	1019171907101710196-1	C57BL6J-638850.43	14852	0.634032	C57BL6J-638850	C57BL6J-638850	wt/wt	M	5.85523	8.50307	7.8		30 Astro-Epen	321 Astroependymal NN	1169 Astroependymal NN_1	5239 Astroependymal NN_1	#666666	#594a26	#0833ce	#00C7CC	#00CC51	321 Astroependymal NN
1019171907101720604-1	SCN	10212.5	6425	1019171907101720604-1	C57BL6J-638850.43	14852	0.561179	C57BL6J-638850	C57BL6J-638850	wt/wt	M	5.84648	8.39122	7.8		30 Astro-Epen	321 Astroependymal NN	1169 Astroependymal NN_1	5239 Astroependymal NN_1	#666666	#594a26	#0833ce	#00C7CC	#00CC51	321 Astroependymal NN
1019171907101730292-2	SCN	9653.73	6284	1019171907101730292-2	C57BL6J-638850.43	14956	0.642549	C57BL6J-638850	C57BL6J-638850	wt/wt	M	5.65984	7.89303	7.8		30 Astro-Epen	318 Astro-NT NN	1160 Astro-NT NN_2	5214 Astro-NT NN_2	#666666	#594a26	#AD5CCC	#1F8ECC	#2C00FF	318 Astro-NT NN
1019171907101720497-1	SCN	9935.61	6795	1019171907101720497-1	C57BL6J-638850.43	14852	0.590481	C57BL6J-638850	C57BL6J-638850	wt/wt	M	5.74967	8.22092	7.8		30 Astro-Epen	321 Astroependymal NN	1169 Astroependymal NN_1	5239 Astroependymal NN_1	#666666	#594a26	#0833ce	#00C7CC	#00CC51	321 Astroependymal NN
1019171907101550845-1	SCN	9150.1	6248	1019171907101550845-1	C57BL6J-638850.43	14983	0.715567	C57BL6J-638850	C57BL6J-638850	wt/wt	M	5.47703	8.46434	7.8		30 Astro-Epen	318 Astro-NT NN	1159 Astro-NT NN_1	5210 Astro-NT NN_1	#666666	#594a26	#AD5CCC	#350099	#992E47	318 Astro-NT NN
1.01917e+18	SCN	10132.4	6184	1.01917e+18	C57BL6J-638850.43	14852	0.668548	C57BL6J-638850	C57BL6J-638850	wt/wt	M	5.44793	8.1678	7.8		30 Astro-Epen	321 Astroependymal NN	1169 Astroependymal NN_1	5239 Astroependymal NN_1	#666666	#594a26	#0833ce	#00C7CC	#00CC51	321 Astroependymal NN
1019171907101710138-2	SCN	11365.2	6962	1019171907101710138-2	C57BL6J-638850.43	14852	0.575381	C57BL6J-638850	C57BL6J-638850	wt/wt	M	5.76463	8.46517	7.8		30 Astro-Epen	321 Astroependymal NN	1169 Astroependymal NN_1	5239 Astroependymal NN_1	#666666	#594a26	#0833ce	#00C7CC	#00CC51	321 Astroependymal NN
1019171907101550214-2	SCN	9601.85	5918	1019171907101550214-2	C57BL6J-638850.43	14956	0.727212	C57BL6J-638850	C57BL6J-638850	wt/wt	M	5.16284	8.11983	7.8		30 Astro-Epen	318 Astro-NT NN	1160 Astro-NT NN_2	5214 Astro-NT NN_2	#666666	#594a26	#AD5CCC	#1F8ECC	#2C00FF	318 Astro-NT NN
1019171907101560300-3	SCN	9499.26	6527	1019171907101560300-3	C57BL6J-638850.43	14956	0.670714	C57BL6J-638850	C57BL6J-638850	wt/wt	M	5.24675	8.00073	7.8		30 Astro-Epen	318 Astro-NT NN	1160 Astro-NT NN_2	5214 Astro-NT NN_2	#666666	#594a26	#AD5CCC	#1F8ECC	#2C00FF	318 Astro-NT NN
1019171907101560405-3	SCN	12608.5	7300	1019171907101560405-3	C57BL6J-638850.43	14852	0.568143	C57BL6J-638850	C57BL6J-638850	wt/wt	M	5.31008	7.9373	7.8		30 Astro-Epen	321 Astroependymal NN	1169 Astroependymal NN_1	5239 Astroependymal NN_1	#666666	#594a26	#0833ce	#00C7CC	#00CC51	321 Astroependymal NN
1019171907101560467-2	SCN	9524.06	6243	1019171907101560467-2	C57BL6J-638850.43	14956	0.613376	C57BL6J-638850	C57BL6J-638850	wt/wt	M	5.34397	7.92204	7.8		30 Astro-Epen	318 Astro-NT NN	1160 Astro-NT NN_2	5214 Astro-NT NN_2	#666666	#594a26	#AD5CCC	#1F8ECC	#2C00FF	318 Astro-NT NN
1.01917e+18	SCN	9524.47	6105	1.01917e+18	C57BL6J-638850.43	14956	0.695545	C57BL6J-638850	C57BL6J-638850	wt/wt	M	5.36198	7.90371	7.8		30 Astro-Epen	318 Astro-NT NN	1160 Astro-NT NN_2	5214 Astro-NT NN_2	#666666	#594a26	#AD5CCC	#1F8ECC	#2C00FF	318 Astro-NT NN
1.01917e+18	SCN	9255.27	6055	1.01917e+18	C57BL6J-638850.43	14956	0.659123	C57BL6J-638850	C57BL6J-638850	wt/wt	M	5.83919	8.12226	7.8		30 Astro-Epen	318 Astro-NT NN	1160 Astro-NT NN_2	5214 Astro-NT NN_2	#666666	#594a26	#AD5CCC	#1F8ECC	#2C00FF	318 Astro-NT NN
1019171907101720336-2	SCN	10816	6423	1019171907101720336-2	C57BL6J-638850.43	14852	0.614709	C57BL6J-638850	C57BL6J-638850	wt/wt	M	5.67919	8.20952	7.8		30 Astro-Epen	321 Astroependymal NN	1169 Astroependymal NN_1	5239 Astroependymal NN_1	#666666	#594a26	#0833ce	#00C7CC	#00CC51	321 Astroependymal NN
1019171907101720432-2	SCN	12350.8	6864	1019171907101720432-2	C57BL6J-638850.43	14852	0.524081	C57BL6J-638850	C57BL6J-638850	wt/wt	M	5.73039	8.34284	7.8		30 Astro-Epen	321 Astroependymal NN	1169 Astroependymal NN_1	5239 Astroependymal NN_1	#666666	#594a26	#0833ce	#00C7CC	#00CC51	321 Astroependymal NN
1019171907101720544-1	SCN	11785.2	7167	1019171907101720544-1	C57BL6J-638850.43	14956	0.573951	C57BL6J-638850	C57BL6J-638850	wt/wt	M	5.79304	8.36643	7.8		30 Astro-Epen	318 Astro-NT NN	1160 Astro-NT NN_2	5214 Astro-NT NN_2	#666666	#594a26	#AD5CCC	#1F8ECC	#2C00FF	318 Astro-NT NN
1.01917e+18	SCN	9465.58	6511	1.01917e+18	C57BL6J-638850.43	14956	0.651249	C57BL6J-638850	C57BL6J-638850	wt/wt	M	5.85093	7.99397	7.8		30 Astro-Epen	318 Astro-NT NN	1160 Astro-NT NN_2	5214 Astro-NT NN_2	#666666	#594a26	#AD5CCC	#1F8ECC	#2C00FF	318 Astro-NT NN
1.01917e+18	SCN	9482.06	6227	1.01917e+18	C57BL6J-638850.43	14956	0.712673	C57BL6J-638850	C57BL6J-638850	wt/wt	M	5.95435	8.25695	7.8		30 Astro-Epen	318 Astro-NT NN	1160 Astro-NT NN_2	5214 Astro-NT NN_2	#666666	#594a26	#AD5CCC	#1F8ECC	#2C00FF	318 Astro-NT NN
1.01917e+18	SCN	9670.74	5869	1.01917e+18	C57BL6J-638850.43	14956	0.775124	C57BL6J-638850	C57BL6J-638850	wt/wt	M	5.95745	8.0803	7.8		30 Astro-Epen	318 Astro-NT NN	1160 Astro-NT NN_2	5214 Astro-NT NN_2	#666666	#594a26	#AD5CCC	#1F8ECC	#2C00FF	318 Astro-NT NN
1019171907101550228-2	SCN	11192.2	6681	1019171907101550228-2	C57BL6J-638850.43	14852	0.567693	C57BL6J-638850	C57BL6J-638850	wt/wt	M	5.20845	8.33399	7.8		30 Astro-Epen	321 Astroependymal NN	1169 Astroependymal NN_1	5239 Astroependymal NN_1	#666666	#594a26	#0833ce	#00C7CC	#00CC51	321 Astroependymal NN
1019171907101550236-3	SCN	9745.88	6787	1019171907101550236-3	C57BL6J-638850.43	14956	0.632711	C57BL6J-638850	C57BL6J-638850	wt/wt	M	5.20154	8.27999	7.8		30 Astro-Epen	318 Astro-NT NN	1160 Astro-NT NN_2	5214 Astro-NT NN_2	#666666	#594a26	#AD5CCC	#1F8ECC	#2C00FF	318 Astro-NT NN
1019171907101550887-1	SCN	14924.1	6507	1019171907101550887-1	C57BL6J-638850.43	14983	0.584847	C57BL6J-638850	C57BL6J-638850	wt/wt	M	5.48769	8.33566	7.8		30 Astro-Epen	318 Astro-NT NN	1159 Astro-NT NN_1	5210 Astro-NT NN_1	#666666	#594a26	#AD5CCC	#350099	#992E47	318 Astro-NT NN
1019171907101710155-1	SCN	10437.7	6874	1019171907101710155-1	C57BL6J-638850.43	14983	0.759002	C57BL6J-638850	C57BL6J-638850	wt/wt	M	5.78669	8.48317	7.8		30 Astro-Epen	318 Astro-NT NN	1159 Astro-NT NN_1	5210 Astro-NT NN_1	#666666	#594a26	#AD5CCC	#350099	#992E47	318 Astro-NT NN
1.01917e+18	SCN	9389.08	6187	1.01917e+18	C57BL6J-638850.43	14956	0.72823	C57BL6J-638850	C57BL6J-638850	wt/wt	M	5.93182	8.3149	7.8		30 Astro-Epen	318 Astro-NT NN	1160 Astro-NT NN_2	5214 Astro-NT NN_2	#666666	#594a26	#AD5CCC	#1F8ECC	#2C00FF	318 Astro-NT NN
1019171907101710011-1	SCN	12197.6	7287	1019171907101710011-1	C57BL6J-638850.43	14852	0.5588	C57BL6J-638850	C57BL6J-638850	wt/wt	M	5.60324	8.53894	7.8		30 Astro-Epen	321 Astroependymal NN	1169 Astroependymal NN_1	5239 Astroependymal NN_1	#666666	#594a26	#0833ce	#00C7CC	#00CC51	321 Astroependymal NN
1.01917e+18	SCN	10207.1	6210	1.01917e+18	C57BL6J-638850.43	14956	0.58083	C57BL6J-638850	C57BL6J-638850	wt/wt	M	5.52996	7.92707	7.8		30 Astro-Epen	318 Astro-NT NN	1160 Astro-NT NN_2	5214 Astro-NT NN_2	#666666	#594a26	#AD5CCC	#1F8ECC	#2C00FF	318 Astro-NT NN
1019171907101540265-1	SCN	10318.4	6808	1019171907101540265-1	C57BL6J-638850.43	14983	0.6937	C57BL6J-638850	C57BL6J-638850	wt/wt	M	5.56337	8.52747	7.8		30 Astro-Epen	318 Astro-NT NN	1159 Astro-NT NN_1	5210 Astro-NT NN_1	#666666	#594a26	#AD5CCC	#350099	#992E47	318 Astro-NT NN
1019171907101540207-1	SCN	10743	6122	1019171907101540207-1	C57BL6J-638850.43	14983	0.703058	C57BL6J-638850	C57BL6J-638850	wt/wt	M	5.49636	8.55433	7.8		30 Astro-Epen	318 Astro-NT NN	1159 Astro-NT NN_1	5210 Astro-NT NN_1	#666666	#594a26	#AD5CCC	#350099	#992E47	318 Astro-NT NN
1019171907101550603-1	SCN	12208.5	6927	1019171907101550603-1	C57BL6J-638850.43	14852	0.549998	C57BL6J-638850	C57BL6J-638850	wt/wt	M	5.32793	8.18207	7.8		30 Astro-Epen	321 Astroependymal NN	1169 Astroependymal NN_1	5239 Astroependymal NN_1	#666666	#594a26	#0833ce	#00C7CC	#00CC51	321 Astroependymal NN
1.01917e+18	SCN	13753.6	6497	1.01917e+18	C57BL6J-638850.43	1427	0.567599	C57BL6J-638850	C57BL6J-638850	wt/wt	M	5.54382	8.47225	7.8	GABA	12 HY GABA	094 SCH Six6 Cdc14a Gaba	0437 SCH Six6 Cdc14a Gaba_2	1612 SCH Six6 Cdc14a Gaba_2	#FF3358	#FF6600	#FFBC4D	#66110F	#CC945C	094 SCH | Vip core
1.01917e+18	SCN	10637.6	6525	1.01917e+18	C57BL6J-638850.43	14852	0.545	C57BL6J-638850	C57BL6J-638850	wt/wt	M	5.52445	8.07246	7.8		30 Astro-Epen	321 Astroependymal NN	1169 Astroependymal NN_1	5239 Astroependymal NN_1	#666666	#594a26	#0833ce	#00C7CC	#00CC51	321 Astroependymal NN
1.01917e+18	SCN	9310.38	5896	1.01917e+18	C57BL6J-638850.43	14956	0.662295	C57BL6J-638850	C57BL6J-638850	wt/wt	M	6.07094	8.28342	7.8		30 Astro-Epen	318 Astro-NT NN	1160 Astro-NT NN_2	5214 Astro-NT NN_2	#666666	#594a26	#AD5CCC	#1F8ECC	#2C00FF	318 Astro-NT NN
1019171907101720508-1	SCN	12227.8	7305	1019171907101720508-1	C57BL6J-638850.43	14852	0.591087	C57BL6J-638850	C57BL6J-638850	wt/wt	M	5.77766	8.41312	7.8		30 Astro-Epen	321 Astroependymal NN	1169 Astroependymal NN_1	5239 Astroependymal NN_1	#666666	#594a26	#0833ce	#00C7CC	#00CC51	321 Astroependymal NN
1.01917e+18	SCN	9712.74	6503	1.01917e+18	C57BL6J-638850.43	14956	0.691566	C57BL6J-638850	C57BL6J-638850	wt/wt	M	5.82682	8.19248	7.8		30 Astro-Epen	318 Astro-NT NN	1160 Astro-NT NN_2	5214 Astro-NT NN_2	#666666	#594a26	#AD5CCC	#1F8ECC	#2C00FF	318 Astro-NT NN
1.01917e+18	SCN	10715.1	6862	1.01917e+18	C57BL6J-638850.43	14852	0.616541	C57BL6J-638850	C57BL6J-638850	wt/wt	M	5.4961	8.5007	7.8		30 Astro-Epen	321 Astroependymal NN	1169 Astroependymal NN_1	5239 Astroependymal NN_1	#666666	#594a26	#0833ce	#00C7CC	#00CC51	321 Astroependymal NN
1.01917e+18	SCN	10673	6926	1.01917e+18	C57BL6J-638850.43	14983	0.69853	C57BL6J-638850	C57BL6J-638850	wt/wt	M	5.54336	8.52149	7.8		30 Astro-Epen	318 Astro-NT NN	1159 Astro-NT NN_1	5210 Astro-NT NN_1	#666666	#594a26	#AD5CCC	#350099	#992E47	318 Astro-NT NN
1019171907101550676-1	SCN	12553.1	7034	1019171907101550676-1	C57BL6J-638850.43	14980	0.569362	C57BL6J-638850	C57BL6J-638850	wt/wt	M	5.36653	8.27051	7.8		30 Astro-Epen	318 Astro-NT NN	1159 Astro-NT NN_1	5209 Astro-NT NN_1	#666666	#594a26	#AD5CCC	#350099	#4DFFA0	318 Astro-NT NN
1.01917e+18	SCN	9149.42	5861	1.01917e+18	C57BL6J-638850.43	14956	0.705343	C57BL6J-638850	C57BL6J-638850	wt/wt	M	6.03771	8.18927	7.8		30 Astro-Epen	318 Astro-NT NN	1160 Astro-NT NN_2	5214 Astro-NT NN_2	#666666	#594a26	#AD5CCC	#1F8ECC	#2C00FF	318 Astro-NT NN
1019171907101720543-1	SCN	9600.56	6652	1019171907101720543-1	C57BL6J-638850.43	14852	0.625902	C57BL6J-638850	C57BL6J-638850	wt/wt	M	5.78978	8.32398	7.8		30 Astro-Epen	321 Astroependymal NN	1169 Astroependymal NN_1	5239 Astroependymal NN_1	#666666	#594a26	#0833ce	#00C7CC	#00CC51	321 Astroependymal NN
1019171907101550879-1	SCN	10236.4	6830	1019171907101550879-1	C57BL6J-638850.43	14983	0.736998	C57BL6J-638850	C57BL6J-638850	wt/wt	M	5.47793	8.33951	7.8		30 Astro-Epen	318 Astro-NT NN	1159 Astro-NT NN_1	5210 Astro-NT NN_1	#666666	#594a26	#AD5CCC	#350099	#992E47	318 Astro-NT NN
1019171907101550326-2	SCN	12767.5	7102	1019171907101550326-2	C57BL6J-638850.43	14852	0.528715	C57BL6J-638850	C57BL6J-638850	wt/wt	M	5.22361	8.13893	7.8		30 Astro-Epen	321 Astroependymal NN	1169 Astroependymal NN_1	5239 Astroependymal NN_1	#666666	#594a26	#0833ce	#00C7CC	#00CC51	321 Astroependymal NN
1019171907101550660-1	SCN	10739.7	6572	1019171907101550660-1	C57BL6J-638850.43	14852	0.546416	C57BL6J-638850	C57BL6J-638850	wt/wt	M	5.39123	8.44647	7.8		30 Astro-Epen	321 Astroependymal NN	1169 Astroependymal NN_1	5239 Astroependymal NN_1	#666666	#594a26	#0833ce	#00C7CC	#00CC51	321 Astroependymal NN
1019171907101560522-1	SCN	9592.74	6259	1019171907101560522-1	C57BL6J-638850.43	14956	0.609847	C57BL6J-638850	C57BL6J-638850	wt/wt	M	5.39102	8.02534	7.8		30 Astro-Epen	318 Astro-NT NN	1160 Astro-NT NN_2	5214 Astro-NT NN_2	#666666	#594a26	#AD5CCC	#1F8ECC	#2C00FF	318 Astro-NT NN
1019171907101550070-3	SCN	10126.6	6806	1019171907101550070-3	C57BL6J-638850.43	14983	0.70971	C57BL6J-638850	C57BL6J-638850	wt/wt	M	5.12291	8.43113	7.8		30 Astro-Epen	318 Astro-NT NN	1159 Astro-NT NN_1	5210 Astro-NT NN_1	#666666	#594a26	#AD5CCC	#350099	#992E47	318 Astro-NT NN
1.01917e+18	SCN	11329.8	6703	1.01917e+18	C57BL6J-638850.43	14983	0.637611	C57BL6J-638850	C57BL6J-638850	wt/wt	M	5.56569	8.32399	7.8		30 Astro-Epen	318 Astro-NT NN	1159 Astro-NT NN_1	5210 Astro-NT NN_1	#666666	#594a26	#AD5CCC	#350099	#992E47	318 Astro-NT NN
1019171907101540181-1	SCN	11766.4	6556	1019171907101540181-1	C57BL6J-638850.43	14983	0.67019	C57BL6J-638850	C57BL6J-638850	wt/wt	M	5.439	8.51113	7.8		30 Astro-Epen	318 Astro-NT NN	1159 Astro-NT NN_1	5210 Astro-NT NN_1	#666666	#594a26	#AD5CCC	#350099	#992E47	318 Astro-NT NN
1019171907101550367-3	SCN	10841.8	6844	1019171907101550367-3	C57BL6J-638850.43	14852	0.541474	C57BL6J-638850	C57BL6J-638850	wt/wt	M	5.29662	8.49967	7.8		30 Astro-Epen	321 Astroependymal NN	1169 Astroependymal NN_1	5239 Astroependymal NN_1	#666666	#594a26	#0833ce	#00C7CC	#00CC51	321 Astroependymal NN
1019171907101710213-2	SCN	9144.47	6086	1019171907101710213-2	C57BL6J-638850.43	14983	0.703811	C57BL6J-638850	C57BL6J-638850	wt/wt	M	5.88615	8.51308	7.8		30 Astro-Epen	318 Astro-NT NN	1159 Astro-NT NN_1	5210 Astro-NT NN_1	#666666	#594a26	#AD5CCC	#350099	#992E47	318 Astro-NT NN
1019171907101720554-1	SCN	10931	6120	1019171907101720554-1	C57BL6J-638850.43	14852	0.532572	C57BL6J-638850	C57BL6J-638850	wt/wt	M	5.74631	7.97215	7.8		30 Astro-Epen	321 Astroependymal NN	1169 Astroependymal NN_1	5239 Astroependymal NN_1	#666666	#594a26	#0833ce	#00C7CC	#00CC51	321 Astroependymal NN
1.01917e+18	SCN	12041	7098	1.01917e+18	C57BL6J-638850.43	14852	0.552938	C57BL6J-638850	C57BL6J-638850	wt/wt	M	5.58386	8.43714	7.8		30 Astro-Epen	321 Astroependymal NN	1169 Astroependymal NN_1	5239 Astroependymal NN_1	#666666	#594a26	#0833ce	#00C7CC	#00CC51	321 Astroependymal NN
1019171907101720563-1	SCN	9321.12	6336	1019171907101720563-1	C57BL6J-638850.43	14956	0.727995	C57BL6J-638850	C57BL6J-638850	wt/wt	M	5.80479	8.31562	7.8		30 Astro-Epen	318 Astro-NT NN	1160 Astro-NT NN_2	5214 Astro-NT NN_2	#666666	#594a26	#AD5CCC	#1F8ECC	#2C00FF	318 Astro-NT NN
1019171907101720400-1	SCN	9365.76	6279	1019171907101720400-1	C57BL6J-638850.43	14852	0.556511	C57BL6J-638850	C57BL6J-638850	wt/wt	M	5.67374	8.04577	7.8		30 Astro-Epen	321 Astroependymal NN	1169 Astroependymal NN_1	5239 Astroependymal NN_1	#666666	#594a26	#0833ce	#00C7CC	#00CC51	321 Astroependymal NN
1019171907101720553-1	SCN	9497.8	6663	1019171907101720553-1	C57BL6J-638850.43	14983	0.691666	C57BL6J-638850	C57BL6J-638850	wt/wt	M	5.77275	8.17738	7.8		30 Astro-Epen	318 Astro-NT NN	1159 Astro-NT NN_1	5210 Astro-NT NN_1	#666666	#594a26	#AD5CCC	#350099	#992E47	318 Astro-NT NN
1.01917e+18	SCN	12232.8	5840	1.01917e+18	C57BL6J-638850.43	14872	0.581733	C57BL6J-638850	C57BL6J-638850	wt/wt	M	5.54556	8.61921	7.8		30 Astro-Epen	318 Astro-NT NN	1159 Astro-NT NN_1	5211 Astro-NT NN_1	#666666	#594a26	#AD5CCC	#350099	#CC7A7B	318 Astro-NT NN
1019171907101550141-3	SCN	14603.5	7026	1019171907101550141-3	C57BL6J-638850.43	14872	0.52916	C57BL6J-638850	C57BL6J-638850	wt/wt	M	5.17037	8.4938	7.8		30 Astro-Epen	318 Astro-NT NN	1159 Astro-NT NN_1	5211 Astro-NT NN_1	#666666	#594a26	#AD5CCC	#350099	#CC7A7B	318 Astro-NT NN
1019171907101710083-2	SCN	12960.4	6824	1019171907101710083-2	C57BL6J-638850.43	14980	0.603175	C57BL6J-638850	C57BL6J-638850	wt/wt	M	5.70675	8.62955	7.8		30 Astro-Epen	318 Astro-NT NN	1159 Astro-NT NN_1	5209 Astro-NT NN_1	#666666	#594a26	#AD5CCC	#350099	#4DFFA0	318 Astro-NT NN
1.01917e+18	SCN	14028.8	7147	1.01917e+18	C57BL6J-638850.43	14990	0.731139	C57BL6J-638850	C57BL6J-638850	wt/wt	M	5.50085	7.86736	7.8		30 Astro-Epen	323 Ependymal NN	1175 Ependymal NN_1	5256 Ependymal NN_1	#666666	#594a26	#D8FF00	#f7f18a	#5CCC67	323 Ependymal NN
1.01917e+18	SCN	11436.1	6192	1.01917e+18	C57BL6J-638850.43	14990	0.756516	C57BL6J-638850	C57BL6J-638850	wt/wt	M	5.50266	7.84025	7.8		30 Astro-Epen	323 Ependymal NN	1175 Ependymal NN_1	5256 Ependymal NN_1	#666666	#594a26	#D8FF00	#f7f18a	#5CCC67	323 Ependymal NN
1.01917e+18	SCN	14158.3	6888	1.01917e+18	C57BL6J-638850.43	14990	0.786534	C57BL6J-638850	C57BL6J-638850	wt/wt	M	5.48873	8.15359	7.8		30 Astro-Epen	323 Ependymal NN	1175 Ependymal NN_1	5256 Ependymal NN_1	#666666	#594a26	#D8FF00	#f7f18a	#5CCC67	323 Ependymal NN
1.01917e+18	SCN	12644.5	6864	1.01917e+18	C57BL6J-638850.43	14990	0.714813	C57BL6J-638850	C57BL6J-638850	wt/wt	M	5.50193	8.21766	7.8		30 Astro-Epen	323 Ependymal NN	1175 Ependymal NN_1	5256 Ependymal NN_1	#666666	#594a26	#D8FF00	#f7f18a	#5CCC67	323 Ependymal NN
1.01917e+18	SCN	13204.3	7118	1.01917e+18	C57BL6J-638850.43	14990	0.819153	C57BL6J-638850	C57BL6J-638850	wt/wt	M	5.48997	7.84062	7.8		30 Astro-Epen	323 Ependymal NN	1175 Ependymal NN_1	5256 Ependymal NN_1	#666666	#594a26	#D8FF00	#f7f18a	#5CCC67	323 Ependymal NN
1.01917e+18	SCN	12730	6870	1.01917e+18	C57BL6J-638850.43	14990	0.76274	C57BL6J-638850	C57BL6J-638850	wt/wt	M	5.49306	7.90626	7.8		30 Astro-Epen	323 Ependymal NN	1175 Ependymal NN_1	5256 Ependymal NN_1	#666666	#594a26	#D8FF00	#f7f18a	#5CCC67	323 Ependymal NN
1.01917e+18	SCN	13069.8	6737	1.01917e+18	C57BL6J-638850.43	14990	0.788397	C57BL6J-638850	C57BL6J-638850	wt/wt	M	5.4887	8.00485	7.8		30 Astro-Epen	323 Ependymal NN	1175 Ependymal NN_1	5256 Ependymal NN_1	#666666	#594a26	#D8FF00	#f7f18a	#5CCC67	323 Ependymal NN
1.01917e+18	SCN	11883.9	6724	1.01917e+18	C57BL6J-638850.43	14990	0.804299	C57BL6J-638850	C57BL6J-638850	wt/wt	M	5.49118	7.88287	7.8		30 Astro-Epen	323 Ependymal NN	1175 Ependymal NN_1	5256 Ependymal NN_1	#666666	#594a26	#D8FF00	#f7f18a	#5CCC67	323 Ependymal NN
1.01917e+18	SCN	9764.68	6130	1.01917e+18	C57BL6J-638850.43	14990	0.549512	C57BL6J-638850	C57BL6J-638850	wt/wt	M	5.48943	8.27245	7.8		30 Astro-Epen	323 Ependymal NN	1175 Ependymal NN_1	5256 Ependymal NN_1	#666666	#594a26	#D8FF00	#f7f18a	#5CCC67	323 Ependymal NN
1.01917e+18	SCN	14883	6720	1.01917e+18	C57BL6J-638850.43	14990	0.723051	C57BL6J-638850	C57BL6J-638850	wt/wt	M	5.50137	8.23617	7.8		30 Astro-Epen	323 Ependymal NN	1175 Ependymal NN_1	5256 Ependymal NN_1	#666666	#594a26	#D8FF00	#f7f18a	#5CCC67	323 Ependymal NN
1.01917e+18	SCN	13834.5	6761	1.01917e+18	C57BL6J-638850.43	14990	0.757665	C57BL6J-638850	C57BL6J-638850	wt/wt	M	5.49051	8.21819	7.8		30 Astro-Epen	323 Ependymal NN	1175 Ependymal NN_1	5256 Ependymal NN_1	#666666	#594a26	#D8FF00	#f7f18a	#5CCC67	323 Ependymal NN
1.01917e+18	SCN	11506.4	7017	1.01917e+18	C57BL6J-638850.43	14990	0.706064	C57BL6J-638850	C57BL6J-638850	wt/wt	M	5.50525	8.31755	7.8		30 Astro-Epen	323 Ependymal NN	1175 Ependymal NN_1	5256 Ependymal NN_1	#666666	#594a26	#D8FF00	#f7f18a	#5CCC67	323 Ependymal NN
1.01917e+18	SCN	11136.9	6148	1.01917e+18	C57BL6J-638850.43	14990	0.719829	C57BL6J-638850	C57BL6J-638850	wt/wt	M	5.50219	8.28611	7.8		30 Astro-Epen	323 Ependymal NN	1175 Ependymal NN_1	5256 Ependymal NN_1	#666666	#594a26	#D8FF00	#f7f18a	#5CCC67	323 Ependymal NN
1.01917e+18	SCN	11159	6630	1.01917e+18	C57BL6J-638850.43	14990	0.750959	C57BL6J-638850	C57BL6J-638850	wt/wt	M	5.50322	8.32582	7.8		30 Astro-Epen	323 Ependymal NN	1175 Ependymal NN_1	5256 Ependymal NN_1	#666666	#594a26	#D8FF00	#f7f18a	#5CCC67	323 Ependymal NN
1.01917e+18	SCN	13041.5	6788	1.01917e+18	C57BL6J-638850.43	14990	0.779848	C57BL6J-638850	C57BL6J-638850	wt/wt	M	5.49144	7.93753	7.8		30 Astro-Epen	323 Ependymal NN	1175 Ependymal NN_1	5256 Ependymal NN_1	#666666	#594a26	#D8FF00	#f7f18a	#5CCC67	323 Ependymal NN
1.01917e+18	SCN	13574.6	7072	1.01917e+18	C57BL6J-638850.43	14990	0.76424	C57BL6J-638850	C57BL6J-638850	wt/wt	M	5.49831	7.97645	7.8		30 Astro-Epen	323 Ependymal NN	1175 Ependymal NN_1	5256 Ependymal NN_1	#666666	#594a26	#D8FF00	#f7f18a	#5CCC67	323 Ependymal NN
1.01917e+18	SCN	12164	6217	1.01917e+18	C57BL6J-638850.43	14990	0.757069	C57BL6J-638850	C57BL6J-638850	wt/wt	M	5.50071	7.87752	7.8		30 Astro-Epen	323 Ependymal NN	1175 Ependymal NN_1	5256 Ependymal NN_1	#666666	#594a26	#D8FF00	#f7f18a	#5CCC67	323 Ependymal NN
1.01917e+18	SCN	12962.6	7134	1.01917e+18	C57BL6J-638850.43	14990	0.810664	C57BL6J-638850	C57BL6J-638850	wt/wt	M	5.48952	7.98567	7.8		30 Astro-Epen	323 Ependymal NN	1175 Ependymal NN_1	5256 Ependymal NN_1	#666666	#594a26	#D8FF00	#f7f18a	#5CCC67	323 Ependymal NN
1.01917e+18	SCN	13397.2	7265	1.01917e+18	C57BL6J-638850.43	14990	0.760393	C57BL6J-638850	C57BL6J-638850	wt/wt	M	5.50239	7.95497	7.8		30 Astro-Epen	323 Ependymal NN	1175 Ependymal NN_1	5256 Ependymal NN_1	#666666	#594a26	#D8FF00	#f7f18a	#5CCC67	323 Ependymal NN
1.01917e+18	SCN	14659.3	7185	1.01917e+18	C57BL6J-638850.43	14990	0.74979	C57BL6J-638850	C57BL6J-638850	wt/wt	M	5.49012	7.9693	7.8		30 Astro-Epen	323 Ependymal NN	1175 Ependymal NN_1	5256 Ependymal NN_1	#666666	#594a26	#D8FF00	#f7f18a	#5CCC67	323 Ependymal NN
1.01917e+18	SCN	13073.1	6517	1.01917e+18	C57BL6J-638850.43	14990	0.763982	C57BL6J-638850	C57BL6J-638850	wt/wt	M	5.50095	7.9331	7.8		30 Astro-Epen	323 Ependymal NN	1175 Ependymal NN_1	5256 Ependymal NN_1	#666666	#594a26	#D8FF00	#f7f18a	#5CCC67	323 Ependymal NN
1.01917e+18	SCN	11486.6	6810	1.01917e+18	C57BL6J-638850.43	14990	0.766425	C57BL6J-638850	C57BL6J-638850	wt/wt	M	5.49248	7.92175	7.8		30 Astro-Epen	323 Ependymal NN	1175 Ependymal NN_1	5256 Ependymal NN_1	#666666	#594a26	#D8FF00	#f7f18a	#5CCC67	323 Ependymal NN
1.01917e+18	SCN	12893.2	6435	1.01917e+18	C57BL6J-638850.43	14990	0.787856	C57BL6J-638850	C57BL6J-638850	wt/wt	M	5.4909	7.96065	7.8		30 Astro-Epen	323 Ependymal NN	1175 Ependymal NN_1	5256 Ependymal NN_1	#666666	#594a26	#D8FF00	#f7f18a	#5CCC67	323 Ependymal NN
1.01917e+18	SCN	13080.9	6947	1.01917e+18	C57BL6J-638850.43	14990	0.73319	C57BL6J-638850	C57BL6J-638850	wt/wt	M	5.48813	8.22892	7.8		30 Astro-Epen	323 Ependymal NN	1175 Ependymal NN_1	5256 Ependymal NN_1	#666666	#594a26	#D8FF00	#f7f18a	#5CCC67	323 Ependymal NN
1.01917e+18	SCN	11523.8	6289	1.01917e+18	C57BL6J-638850.43	14990	0.759583	C57BL6J-638850	C57BL6J-638850	wt/wt	M	5.50324	8.30474	7.8		30 Astro-Epen	323 Ependymal NN	1175 Ependymal NN_1	5256 Ependymal NN_1	#666666	#594a26	#D8FF00	#f7f18a	#5CCC67	323 Ependymal NN
1.01917e+18	SCN	13862.8	7052	1.01917e+18	C57BL6J-638850.43	14990	0.821446	C57BL6J-638850	C57BL6J-638850	wt/wt	M	5.50101	7.89462	7.8		30 Astro-Epen	323 Ependymal NN	1175 Ependymal NN_1	5256 Ependymal NN_1	#666666	#594a26	#D8FF00	#f7f18a	#5CCC67	323 Ependymal NN
1.01917e+18	SCN	11941.3	6364	1.01917e+18	C57BL6J-638850.43	14993	0.700353	C57BL6J-638850	C57BL6J-638850	wt/wt	M	5.50429	8.27045	7.8		30 Astro-Epen	323 Ependymal NN	1175 Ependymal NN_1	5258 Ependymal NN_1	#666666	#594a26	#D8FF00	#f7f18a	#998D45	323 Ependymal NN
1.01917e+18	SCN	15556.9	7207	1.01917e+18	C57BL6J-638850.43	14990	0.729999	C57BL6J-638850	C57BL6J-638850	wt/wt	M	5.49476	8.30955	7.8		30 Astro-Epen	323 Ependymal NN	1175 Ependymal NN_1	5256 Ependymal NN_1	#666666	#594a26	#D8FF00	#f7f18a	#5CCC67	323 Ependymal NN
1.01917e+18	SCN	11666.9	6808	1.01917e+18	C57BL6J-638850.43	14990	0.751601	C57BL6J-638850	C57BL6J-638850	wt/wt	M	5.49359	8.10887	7.8		30 Astro-Epen	323 Ependymal NN	1175 Ependymal NN_1	5256 Ependymal NN_1	#666666	#594a26	#D8FF00	#f7f18a	#5CCC67	323 Ependymal NN
1.01917e+18	SCN	13094.7	6875	1.01917e+18	C57BL6J-638850.43	14990	0.774034	C57BL6J-638850	C57BL6J-638850	wt/wt	M	5.49448	8.29465	7.8		30 Astro-Epen	323 Ependymal NN	1175 Ependymal NN_1	5256 Ependymal NN_1	#666666	#594a26	#D8FF00	#f7f18a	#5CCC67	323 Ependymal NN
1.01917e+18	SCN	14606.2	6918	1.01917e+18	C57BL6J-638850.43	14990	0.676793	C57BL6J-638850	C57BL6J-638850	wt/wt	M	5.49444	8.07332	7.8		30 Astro-Epen	323 Ependymal NN	1175 Ependymal NN_1	5256 Ependymal NN_1	#666666	#594a26	#D8FF00	#f7f18a	#5CCC67	323 Ependymal NN
1.01917e+18	SCN	11158.6	6644	1.01917e+18	C57BL6J-638850.43	14990	0.73554	C57BL6J-638850	C57BL6J-638850	wt/wt	M	5.4965	8.12208	7.8		30 Astro-Epen	323 Ependymal NN	1175 Ependymal NN_1	5256 Ependymal NN_1	#666666	#594a26	#D8FF00	#f7f18a	#5CCC67	323 Ependymal NN
1.01917e+18	SCN	13248.6	6400	1.01917e+18	C57BL6J-638850.43	14990	0.723305	C57BL6J-638850	C57BL6J-638850	wt/wt	M	5.48811	8.14064	7.8		30 Astro-Epen	323 Ependymal NN	1175 Ependymal NN_1	5256 Ependymal NN_1	#666666	#594a26	#D8FF00	#f7f18a	#5CCC67	323 Ependymal NN
1.01917e+18	SCN	11833.7	6695	1.01917e+18	C57BL6J-638850.43	14990	0.700906	C57BL6J-638850	C57BL6J-638850	wt/wt	M	5.49152	7.89354	7.8		30 Astro-Epen	323 Ependymal NN	1175 Ependymal NN_1	5256 Ependymal NN_1	#666666	#594a26	#D8FF00	#f7f18a	#5CCC67	323 Ependymal NN
1.01917e+18	SCN	13776.6	6812	1.01917e+18	C57BL6J-638850.43	14990	0.744258	C57BL6J-638850	C57BL6J-638850	wt/wt	M	5.49986	8.18024	7.8		30 Astro-Epen	323 Ependymal NN	1175 Ependymal NN_1	5256 Ependymal NN_1	#666666	#594a26	#D8FF00	#f7f18a	#5CCC67	323 Ependymal NN
1.01917e+18	SCN	11695.8	6642	1.01917e+18	C57BL6J-638850.43	14990	0.787123	C57BL6J-638850	C57BL6J-638850	wt/wt	M	5.49588	8.02842	7.8		30 Astro-Epen	323 Ependymal NN	1175 Ependymal NN_1	5256 Ependymal NN_1	#666666	#594a26	#D8FF00	#f7f18a	#5CCC67	323 Ependymal NN
1.01917e+18	SCN	13955.7	7006	1.01917e+18	C57BL6J-638850.43	14990	0.687559	C57BL6J-638850	C57BL6J-638850	wt/wt	M	5.48563	8.09185	7.8		30 Astro-Epen	323 Ependymal NN	1175 Ependymal NN_1	5256 Ependymal NN_1	#666666	#594a26	#D8FF00	#f7f18a	#5CCC67	323 Ependymal NN
1.01917e+18	SCN	21172	7036	1.01917e+18	C57BL6J-638850.43	14990	0.628193	C57BL6J-638850	C57BL6J-638850	wt/wt	M	5.49791	8.22718	7.8		30 Astro-Epen	323 Ependymal NN	1175 Ependymal NN_1	5256 Ependymal NN_1	#666666	#594a26	#D8FF00	#f7f18a	#5CCC67	323 Ependymal NN
1.01917e+18	SCN	11551.1	7028	1.01917e+18	C57BL6J-638850.43	14990	0.694478	C57BL6J-638850	C57BL6J-638850	wt/wt	M	5.4847	8.07389	7.8		30 Astro-Epen	323 Ependymal NN	1175 Ependymal NN_1	5256 Ependymal NN_1	#666666	#594a26	#D8FF00	#f7f18a	#5CCC67	323 Ependymal NN
1.01917e+18	SCN	13391.3	6849	1.01917e+18	C57BL6J-638850.43	14990	0.779101	C57BL6J-638850	C57BL6J-638850	wt/wt	M	5.50009	7.84906	7.8		30 Astro-Epen	323 Ependymal NN	1175 Ependymal NN_1	5256 Ependymal NN_1	#666666	#594a26	#D8FF00	#f7f18a	#5CCC67	323 Ependymal NN
1.01917e+18	SCN	14586.4	6780	1.01917e+18	C57BL6J-638850.43	14990	0.732086	C57BL6J-638850	C57BL6J-638850	wt/wt	M	5.48793	8.13078	7.8		30 Astro-Epen	323 Ependymal NN	1175 Ependymal NN_1	5256 Ependymal NN_1	#666666	#594a26	#D8FF00	#f7f18a	#5CCC67	323 Ependymal NN
1.01917e+18	SCN	13787.7	6741	1.01917e+18	C57BL6J-638850.43	14990	0.742924	C57BL6J-638850	C57BL6J-638850	wt/wt	M	5.49832	8.14232	7.8		30 Astro-Epen	323 Ependymal NN	1175 Ependymal NN_1	5256 Ependymal NN_1	#666666	#594a26	#D8FF00	#f7f18a	#5CCC67	323 Ependymal NN
1.01917e+18	SCN	12346	6676	1.01917e+18	C57BL6J-638850.43	14990	0.776378	C57BL6J-638850	C57BL6J-638850	wt/wt	M	5.49209	7.95033	7.8		30 Astro-Epen	323 Ependymal NN	1175 Ependymal NN_1	5256 Ependymal NN_1	#666666	#594a26	#D8FF00	#f7f18a	#5CCC67	323 Ependymal NN
1019171907101730018-1	SCN	12666.4	6618	1019171907101730018-1	C57BL6J-638850.43	14990	0.778046	C57BL6J-638850	C57BL6J-638850	wt/wt	M	5.49121	7.85765	7.8		30 Astro-Epen	323 Ependymal NN	1175 Ependymal NN_1	5256 Ependymal NN_1	#666666	#594a26	#D8FF00	#f7f18a	#5CCC67	323 Ependymal NN
1.01917e+18	SCN	13412.2	6730	1.01917e+18	C57BL6J-638850.43	14990	0.662478	C57BL6J-638850	C57BL6J-638850	wt/wt	M	5.49576	8.27673	7.8		30 Astro-Epen	323 Ependymal NN	1175 Ependymal NN_1	5256 Ependymal NN_1	#666666	#594a26	#D8FF00	#f7f18a	#5CCC67	323 Ependymal NN
1019171907101730020-1	SCN	11706.5	6342	1019171907101730020-1	C57BL6J-638850.43	14990	0.766907	C57BL6J-638850	C57BL6J-638850	wt/wt	M	5.50327	7.92369	7.8		30 Astro-Epen	323 Ependymal NN	1175 Ependymal NN_1	5256 Ependymal NN_1	#666666	#594a26	#D8FF00	#f7f18a	#5CCC67	323 Ependymal NN
1.01917e+18	SCN	11340.7	6692	1.01917e+18	C57BL6J-638850.43	14990	0.641405	C57BL6J-638850	C57BL6J-638850	wt/wt	M	5.49488	8.24057	7.8		30 Astro-Epen	323 Ependymal NN	1175 Ependymal NN_1	5256 Ependymal NN_1	#666666	#594a26	#D8FF00	#f7f18a	#5CCC67	323 Ependymal NN
1019171907101730041-2	SCN	12272.4	6649	1019171907101730041-2	C57BL6J-638850.43	14990	0.718518	C57BL6J-638850	C57BL6J-638850	wt/wt	M	5.50213	7.85885	7.8		30 Astro-Epen	323 Ependymal NN	1175 Ependymal NN_1	5256 Ependymal NN_1	#666666	#594a26	#D8FF00	#f7f18a	#5CCC67	323 Ependymal NN
1.01917e+18	SCN	15912	6728	1.01917e+18	C57BL6J-638850.43	14990	0.715478	C57BL6J-638850	C57BL6J-638850	wt/wt	M	5.49906	7.98949	7.8		30 Astro-Epen	323 Ependymal NN	1175 Ependymal NN_1	5256 Ependymal NN_1	#666666	#594a26	#D8FF00	#f7f18a	#5CCC67	323 Ependymal NN
1.01917e+18	SCN	12245.9	6676	1.01917e+18	C57BL6J-638850.43	14990	0.784227	C57BL6J-638850	C57BL6J-638850	wt/wt	M	5.49713	8.16358	7.8		30 Astro-Epen	323 Ependymal NN	1175 Ependymal NN_1	5256 Ependymal NN_1	#666666	#594a26	#D8FF00	#f7f18a	#5CCC67	323 Ependymal NN
1.01917e+18	SCN	11241.2	6709	1.01917e+18	C57BL6J-638850.43	14990	0.721723	C57BL6J-638850	C57BL6J-638850	wt/wt	M	5.49382	8.19314	7.8		30 Astro-Epen	323 Ependymal NN	1175 Ependymal NN_1	5256 Ependymal NN_1	#666666	#594a26	#D8FF00	#f7f18a	#5CCC67	323 Ependymal NN
1.01917e+18	SCN	10444.6	6170	1.01917e+18	C57BL6J-638850.43	14990	0.70913	C57BL6J-638850	C57BL6J-638850	wt/wt	M	5.49238	8.04137	7.8		30 Astro-Epen	323 Ependymal NN	1175 Ependymal NN_1	5256 Ependymal NN_1	#666666	#594a26	#D8FF00	#f7f18a	#5CCC67	323 Ependymal NN
1.01917e+18	SCN	13248.3	6749	1.01917e+18	C57BL6J-638850.43	14990	0.734464	C57BL6J-638850	C57BL6J-638850	wt/wt	M	5.48796	8.11873	7.8		30 Astro-Epen	323 Ependymal NN	1175 Ependymal NN_1	5256 Ependymal NN_1	#666666	#594a26	#D8FF00	#f7f18a	#5CCC67	323 Ependymal NN
1.01917e+18	SCN	13704.8	6777	1.01917e+18	C57BL6J-638850.43	14990	0.784186	C57BL6J-638850	C57BL6J-638850	wt/wt	M	5.49689	8.25512	7.8		30 Astro-Epen	323 Ependymal NN	1175 Ependymal NN_1	5256 Ependymal NN_1	#666666	#594a26	#D8FF00	#f7f18a	#5CCC67	323 Ependymal NN
1.01917e+18	SCN	12293.2	6602	1.01917e+18	C57BL6J-638850.43	14990	0.747932	C57BL6J-638850	C57BL6J-638850	wt/wt	M	5.48598	8.02122	7.8		30 Astro-Epen	323 Ependymal NN	1175 Ependymal NN_1	5256 Ependymal NN_1	#666666	#594a26	#D8FF00	#f7f18a	#5CCC67	323 Ependymal NN
1.01917e+18	SCN	13114.3	7109	1.01917e+18	C57BL6J-638850.43	14990	0.793685	C57BL6J-638850	C57BL6J-638850	wt/wt	M	5.495	8.09572	7.8		30 Astro-Epen	323 Ependymal NN	1175 Ependymal NN_1	5256 Ependymal NN_1	#666666	#594a26	#D8FF00	#f7f18a	#5CCC67	323 Ependymal NN
1.01917e+18	SCN	15305.2	7186	1.01917e+18	C57BL6J-638850.43	14990	0.801556	C57BL6J-638850	C57BL6J-638850	wt/wt	M	5.49501	8.01652	7.8		30 Astro-Epen	323 Ependymal NN	1175 Ependymal NN_1	5256 Ependymal NN_1	#666666	#594a26	#D8FF00	#f7f18a	#5CCC67	323 Ependymal NN
1.01917e+18	SCN	13526.4	6774	1.01917e+18	C57BL6J-638850.43	5203	0.552351	C57BL6J-638850	C57BL6J-638850	wt/wt	M	5.40994	8.0283	7.8		31 OPC-Oligo	326 OPC NN	1179 OPC NN_1	5269 OPC NN_1	#666666	#03045E	#FF26CB	#CC0049	#5C997B	326 OPC NN
1019171907101550299-3	SCN	13941.4	6592	1019171907101550299-3	C57BL6J-638850.43	1427	0.507263	C57BL6J-638850	C57BL6J-638850	wt/wt	M	5.26729	8.48255	7.8	GABA	12 HY GABA	094 SCH Six6 Cdc14a Gaba	0437 SCH Six6 Cdc14a Gaba_2	1612 SCH Six6 Cdc14a Gaba_2	#FF3358	#FF6600	#FFBC4D	#66110F	#CC945C	094 SCH | Vip core
1.01917e+18	SCN	8935.38	6791	1.01917e+18	C57BL6J-638850.43	14956	0.590452	C57BL6J-638850	C57BL6J-638850	wt/wt	M	6.08668	8.41805	7.8		30 Astro-Epen	318 Astro-NT NN	1160 Astro-NT NN_2	5214 Astro-NT NN_2	#666666	#594a26	#AD5CCC	#1F8ECC	#2C00FF	318 Astro-NT NN
1.01917e+18	SCN	9874.29	6241	1.01917e+18	C57BL6J-638850.43	5231	0.754611	C57BL6J-638850	C57BL6J-638850	wt/wt	M	5.62944	8.60675	7.8		31 OPC-Oligo	327 Oligo NN	1184 MOL NN_4	5285 MOL NN_4	#666666	#03045E	#99FFBC	#99CAFF	#5A662E	327 Oligo NN
1.01917e+18	SCN	14305.6	5240	1.01917e+18	C57BL6J-638850.43	5232	0.743128	C57BL6J-638850	C57BL6J-638850	wt/wt	M	6.0198	8.53205	7.8		31 OPC-Oligo	327 Oligo NN	1184 MOL NN_4	5286 MOL NN_4	#666666	#03045E	#99FFBC	#99CAFF	#9FFF99	327 Oligo NN
1.01917e+18	SCN	12565.1	5739	1.01917e+18	C57BL6J-638850.43	5232	0.766745	C57BL6J-638850	C57BL6J-638850	wt/wt	M	5.42811	8.51231	7.8		31 OPC-Oligo	327 Oligo NN	1184 MOL NN_4	5286 MOL NN_4	#666666	#03045E	#99FFBC	#99CAFF	#9FFF99	327 Oligo NN
1.01917e+18	SCN	12321.1	5260	1.01917e+18	C57BL6J-638850.43	5232	0.5874	C57BL6J-638850	C57BL6J-638850	wt/wt	M	5.61527	8.58337	7.8		31 OPC-Oligo	327 Oligo NN	1184 MOL NN_4	5286 MOL NN_4	#666666	#03045E	#99FFBC	#99CAFF	#9FFF99	327 Oligo NN
1019171907101550148-1	SCN	12730.7	5525	1019171907101550148-1	C57BL6J-638850.43	5232	0.582628	C57BL6J-638850	C57BL6J-638850	wt/wt	M	5.18375	8.5097	7.8		31 OPC-Oligo	327 Oligo NN	1184 MOL NN_4	5286 MOL NN_4	#666666	#03045E	#99FFBC	#99CAFF	#9FFF99	327 Oligo NN
1.01917e+18	SCN	13848.8	5688	1.01917e+18	C57BL6J-638850.43	5232	0.77452	C57BL6J-638850	C57BL6J-638850	wt/wt	M	5.50888	8.41958	7.8		31 OPC-Oligo	327 Oligo NN	1184 MOL NN_4	5286 MOL NN_4	#666666	#03045E	#99FFBC	#99CAFF	#9FFF99	327 Oligo NN
1019171907101540169-1	SCN	12879.2	6154	1019171907101540169-1	C57BL6J-638850.43	5232	0.65399	C57BL6J-638850	C57BL6J-638850	wt/wt	M	5.42476	8.59684	7.8		31 OPC-Oligo	327 Oligo NN	1184 MOL NN_4	5286 MOL NN_4	#666666	#03045E	#99FFBC	#99CAFF	#9FFF99	327 Oligo NN
1019171907101710271-1	SCN	12785.5	5961	1019171907101710271-1	C57BL6J-638850.43	5232	0.546666	C57BL6J-638850	C57BL6J-638850	wt/wt	M	6.00904	8.5305	7.8		31 OPC-Oligo	327 Oligo NN	1184 MOL NN_4	5286 MOL NN_4	#666666	#03045E	#99FFBC	#99CAFF	#9FFF99	327 Oligo NN
1019171907101710238-2	SCN	13048.9	5734	1019171907101710238-2	C57BL6J-638850.43	5232	0.752716	C57BL6J-638850	C57BL6J-638850	wt/wt	M	5.95094	8.58378	7.8		31 OPC-Oligo	327 Oligo NN	1184 MOL NN_4	5286 MOL NN_4	#666666	#03045E	#99FFBC	#99CAFF	#9FFF99	327 Oligo NN
1019171907101710149-1	SCN	12391.1	5720	1019171907101710149-1	C57BL6J-638850.43	5232	0.784528	C57BL6J-638850	C57BL6J-638850	wt/wt	M	5.80052	8.61782	7.8		31 OPC-Oligo	327 Oligo NN	1184 MOL NN_4	5286 MOL NN_4	#666666	#03045E	#99FFBC	#99CAFF	#9FFF99	327 Oligo NN
1019171907101710094-1	SCN	12402.8	6135	1019171907101710094-1	C57BL6J-638850.43	5230	0.78498	C57BL6J-638850	C57BL6J-638850	wt/wt	M	5.71639	8.59155	7.8		31 OPC-Oligo	327 Oligo NN	1184 MOL NN_4	5284 MOL NN_4	#666666	#03045E	#99FFBC	#99CAFF	#5B2E66	327 Oligo NN
1.01917e+18	SCN	12515	6086	1.01917e+18	C57BL6J-638850.43	5232	0.723128	C57BL6J-638850	C57BL6J-638850	wt/wt	M	5.80102	8.56274	7.8		31 OPC-Oligo	327 Oligo NN	1184 MOL NN_4	5286 MOL NN_4	#666666	#03045E	#99FFBC	#99CAFF	#9FFF99	327 Oligo NN
1019171907101710187-2	SCN	12812.3	5739	1019171907101710187-2	C57BL6J-638850.43	5232	0.620175	C57BL6J-638850	C57BL6J-638850	wt/wt	M	5.864	8.61237	7.8		31 OPC-Oligo	327 Oligo NN	1184 MOL NN_4	5286 MOL NN_4	#666666	#03045E	#99FFBC	#99CAFF	#9FFF99	327 Oligo NN
1019171907101540103-1	SCN	12888.9	5916	1019171907101540103-1	C57BL6J-638850.43	5232	0.797378	C57BL6J-638850	C57BL6J-638850	wt/wt	M	5.31998	8.57804	7.8		31 OPC-Oligo	327 Oligo NN	1184 MOL NN_4	5286 MOL NN_4	#666666	#03045E	#99FFBC	#99CAFF	#9FFF99	327 Oligo NN
1.01917e+18	SCN	12563.4	6104	1.01917e+18	C57BL6J-638850.43	5232	0.739476	C57BL6J-638850	C57BL6J-638850	wt/wt	M	5.64762	8.58716	7.8		31 OPC-Oligo	327 Oligo NN	1184 MOL NN_4	5286 MOL NN_4	#666666	#03045E	#99FFBC	#99CAFF	#9FFF99	327 Oligo NN
1.01917e+18	SCN	13179.1	5860	1.01917e+18	C57BL6J-638850.43	5232	0.625574	C57BL6J-638850	C57BL6J-638850	wt/wt	M	5.38734	8.54838	7.8		31 OPC-Oligo	327 Oligo NN	1184 MOL NN_4	5286 MOL NN_4	#666666	#03045E	#99FFBC	#99CAFF	#9FFF99	327 Oligo NN
1019171907101710178-1	SCN	12548.5	6198	1019171907101710178-1	C57BL6J-638850.43	5232	0.641838	C57BL6J-638850	C57BL6J-638850	wt/wt	M	5.83827	8.52269	7.8		31 OPC-Oligo	327 Oligo NN	1184 MOL NN_4	5286 MOL NN_4	#666666	#03045E	#99FFBC	#99CAFF	#9FFF99	327 Oligo NN
1019171907101540119-1	SCN	11798.8	6727	1019171907101540119-1	C57BL6J-638850.43	5233	0.789747	C57BL6J-638850	C57BL6J-638850	wt/wt	M	5.34891	8.60952	7.8		31 OPC-Oligo	327 Oligo NN	1184 MOL NN_4	5287 MOL NN_4	#666666	#03045E	#99FFBC	#99CAFF	#5C996D	327 Oligo NN
1.01917e+18	SCN	14186.6	6456	1.01917e+18	C57BL6J-638850.43	5234	0.546215	C57BL6J-638850	C57BL6J-638850	wt/wt	M	5.64348	8.51732	7.8		31 OPC-Oligo	327 Oligo NN	1183 MFOL NN_3	5282 MFOL NN_3	#666666	#03045E	#99FFBC	#FF8F73	#51FF4D	327 Oligo NN
1019171907101720465-1	SCN	13893.4	6668	1019171907101720465-1	C57BL6J-638850.43	5234	0.623283	C57BL6J-638850	C57BL6J-638850	wt/wt	M	5.69068	7.98917	7.8		31 OPC-Oligo	327 Oligo NN	1183 MFOL NN_3	5282 MFOL NN_3	#666666	#03045E	#99FFBC	#FF8F73	#51FF4D	327 Oligo NN
1019171907101710081-2	SCN	12366	6577	1019171907101710081-2	C57BL6J-638850.43	5236	0.731023	C57BL6J-638850	C57BL6J-638850	wt/wt	M	5.69891	8.59369	7.8		31 OPC-Oligo	327 Oligo NN	1183 MFOL NN_3	5283 MFOL NN_3	#666666	#03045E	#99FFBC	#FF8F73	#264EFF	327 Oligo NN
1.01917e+18	SCN	12997.5	6453	1.01917e+18	C57BL6J-638850.43	5237	0.559705	C57BL6J-638850	C57BL6J-638850	wt/wt	M	5.42097	8.07206	7.8		31 OPC-Oligo	327 Oligo NN	1184 MOL NN_4	5288 MOL NN_4	#666666	#03045E	#99FFBC	#99CAFF	#3D5666	327 Oligo NN
1.01917e+18	SCN	11114.5	6543	1.01917e+18	C57BL6J-638850.43	5237	0.785652	C57BL6J-638850	C57BL6J-638850	wt/wt	M	5.84105	8.62706	7.8		31 OPC-Oligo	327 Oligo NN	1184 MOL NN_4	5288 MOL NN_4	#666666	#03045E	#99FFBC	#99CAFF	#3D5666	327 Oligo NN
1.01917e+18	SCN	10682.8	5584	1.01917e+18	C57BL6J-638850.43	5231	0.694773	C57BL6J-638850	C57BL6J-638850	wt/wt	M	5.52662	8.51239	7.8		31 OPC-Oligo	327 Oligo NN	1184 MOL NN_4	5285 MOL NN_4	#666666	#03045E	#99FFBC	#99CAFF	#5A662E	327 Oligo NN
1.01917e+18	SCN	9197.16	6123	1.01917e+18	C57BL6J-638850.43	5231	0.706491	C57BL6J-638850	C57BL6J-638850	wt/wt	M	5.65189	8.61795	7.8		31 OPC-Oligo	327 Oligo NN	1184 MOL NN_4	5285 MOL NN_4	#666666	#03045E	#99FFBC	#99CAFF	#5A662E	327 Oligo NN
1.01917e+18	SCN	10375.1	6035	1.01917e+18	C57BL6J-638850.43	5231	0.718503	C57BL6J-638850	C57BL6J-638850	wt/wt	M	5.40615	8.5945	7.8		31 OPC-Oligo	327 Oligo NN	1184 MOL NN_4	5285 MOL NN_4	#666666	#03045E	#99FFBC	#99CAFF	#5A662E	327 Oligo NN
1019171907101710145-1	SCN	10806.6	6072	1019171907101710145-1	C57BL6J-638850.43	5231	0.76113	C57BL6J-638850	C57BL6J-638850	wt/wt	M	5.78534	8.55313	7.8		31 OPC-Oligo	327 Oligo NN	1184 MOL NN_4	5285 MOL NN_4	#666666	#03045E	#99FFBC	#99CAFF	#5A662E	327 Oligo NN
1.01917e+18	SCN	10416.9	5912	1.01917e+18	C57BL6J-638850.43	5231	0.689251	C57BL6J-638850	C57BL6J-638850	wt/wt	M	5.51408	8.29359	7.8		31 OPC-Oligo	327 Oligo NN	1184 MOL NN_4	5285 MOL NN_4	#666666	#03045E	#99FFBC	#99CAFF	#5A662E	327 Oligo NN
1019171907101710175-2	SCN	9253.02	5502	1019171907101710175-2	C57BL6J-638850.43	5231	0.619845	C57BL6J-638850	C57BL6J-638850	wt/wt	M	5.83085	8.54424	7.8		31 OPC-Oligo	327 Oligo NN	1184 MOL NN_4	5285 MOL NN_4	#666666	#03045E	#99FFBC	#99CAFF	#5A662E	327 Oligo NN
1019171907101540226-1	SCN	10390.6	5892	1019171907101540226-1	C57BL6J-638850.43	5231	0.702476	C57BL6J-638850	C57BL6J-638850	wt/wt	M	5.51462	8.51319	7.8		31 OPC-Oligo	327 Oligo NN	1184 MOL NN_4	5285 MOL NN_4	#666666	#03045E	#99FFBC	#99CAFF	#5A662E	327 Oligo NN
1019171907101550582-2	SCN	16205.9	6918	1019171907101550582-2	C57BL6J-638850.43	1432	0.75098	C57BL6J-638850	C57BL6J-638850	wt/wt	M	5.30614	8.08867	7.8	GABA	12 HY GABA	094 SCH Six6 Cdc14a Gaba	0436 SCH Six6 Cdc14a Gaba_1	1608 SCH Six6 Cdc14a Gaba_1	#FF3358	#FF6600	#FFBC4D	#00FF8D	#5CCC69	094 SCH | Avp shell
1.01917e+18	SCN	16313.7	6831	1.01917e+18	C57BL6J-638850.43	1432	0.738822	C57BL6J-638850	C57BL6J-638850	wt/wt	M	5.36805	8.05628	7.8	GABA	12 HY GABA	094 SCH Six6 Cdc14a Gaba	0436 SCH Six6 Cdc14a Gaba_1	1608 SCH Six6 Cdc14a Gaba_1	#FF3358	#FF6600	#FFBC4D	#00FF8D	#5CCC69	094 SCH | Avp shell
1.01917e+18	SCN	15742.1	6815	1.01917e+18	C57BL6J-638850.43	1432	0.778858	C57BL6J-638850	C57BL6J-638850	wt/wt	M	5.3546	7.9958	7.8	GABA	12 HY GABA	094 SCH Six6 Cdc14a Gaba	0436 SCH Six6 Cdc14a Gaba_1	1608 SCH Six6 Cdc14a Gaba_1	#FF3358	#FF6600	#FFBC4D	#00FF8D	#5CCC69	094 SCH | Avp shell
1.01917e+18	SCN	13816.4	7073	1.01917e+18	C57BL6J-638850.43	1426	0.679264	C57BL6J-638850	C57BL6J-638850	wt/wt	M	5.42241	8.47869	7.8	GABA	12 HY GABA	094 SCH Six6 Cdc14a Gaba	0436 SCH Six6 Cdc14a Gaba_1	1605 SCH Six6 Cdc14a Gaba_1	#FF3358	#FF6600	#FFBC4D	#00FF8D	#FF4DE0	094 SCH | Cck/C1ql3
1.01917e+18	SCN	20062.3	7491	1.01917e+18	C57BL6J-638850.43	2509	0.677438	C57BL6J-638850	C57BL6J-638850	wt/wt	M	5.98343	8.28872	7.8	Glut	14 HY Glut	132 AHN-RCH-LHA Otp Fezf1 Glut	0580 AHN-RCH-LHA Otp Fezf1 Glut_2	2345 AHN-RCH-LHA Otp Fezf1 Glut_2	#2B93DF	#AA0DFE	#2E9957	#99455A	#660031	132 AHN-RCH-LHA Otp Fezf1 Glut
1019171907101550567-1	SCN	14981.6	6801	1019171907101550567-1	C57BL6J-638850.43	1432	0.587864	C57BL6J-638850	C57BL6J-638850	wt/wt	M	5.31133	8.169	7.8	GABA	12 HY GABA	094 SCH Six6 Cdc14a Gaba	0436 SCH Six6 Cdc14a Gaba_1	1608 SCH Six6 Cdc14a Gaba_1	#FF3358	#FF6600	#FFBC4D	#00FF8D	#5CCC69	094 SCH | Avp shell
1019171907101720444-1	SCN	15634.9	6889	1019171907101720444-1	C57BL6J-638850.43	1432	0.692832	C57BL6J-638850	C57BL6J-638850	wt/wt	M	5.6849	8.01687	7.8	GABA	12 HY GABA	094 SCH Six6 Cdc14a Gaba	0436 SCH Six6 Cdc14a Gaba_1	1608 SCH Six6 Cdc14a Gaba_1	#FF3358	#FF6600	#FFBC4D	#00FF8D	#5CCC69	094 SCH | Avp shell
1019171907101550638-1	SCN	15279.6	6768	1019171907101550638-1	C57BL6J-638850.43	1432	0.757264	C57BL6J-638850	C57BL6J-638850	wt/wt	M	5.31987	8.05696	7.8	GABA	12 HY GABA	094 SCH Six6 Cdc14a Gaba	0436 SCH Six6 Cdc14a Gaba_1	1608 SCH Six6 Cdc14a Gaba_1	#FF3358	#FF6600	#FFBC4D	#00FF8D	#5CCC69	094 SCH | Avp shell
1019171907101560568-1	SCN	17331.1	7050	1019171907101560568-1	C57BL6J-638850.43	1428	0.67002	C57BL6J-638850	C57BL6J-638850	wt/wt	M	5.39955	7.91335	7.8	GABA	12 HY GABA	094 SCH Six6 Cdc14a Gaba	0436 SCH Six6 Cdc14a Gaba_1	1606 SCH Six6 Cdc14a Gaba_1	#FF3358	#FF6600	#FFBC4D	#00FF8D	#5F0066	094 SCH | Avp shell
1019171907101730336-2	SCN	17331.8	7164	1019171907101730336-2	C57BL6J-638850.43	1437	0.689539	C57BL6J-638850	C57BL6J-638850	wt/wt	M	5.67413	7.85333	7.8	GABA	12 HY GABA	097 PVHd-SBPV Six3 Prox1 Gaba	0445 PVHd-SBPV Six3 Prox1 Gaba_4	1642 PVHd-SBPV Six3 Prox1 Gaba_4	#FF3358	#FF6600	#2E3D66	#48663D	#CC3D5F	097 PVHd-SBPV Six3 Prox1 Gaba
1.01917e+18	SCN	15474	6830	1.01917e+18	C57BL6J-638850.43	1432	0.735185	C57BL6J-638850	C57BL6J-638850	wt/wt	M	5.68756	8.04036	7.8	GABA	12 HY GABA	094 SCH Six6 Cdc14a Gaba	0436 SCH Six6 Cdc14a Gaba_1	1608 SCH Six6 Cdc14a Gaba_1	#FF3358	#FF6600	#FFBC4D	#00FF8D	#5CCC69	094 SCH | Avp shell
1019171907101720172-2	SCN	15327.3	6811	1019171907101720172-2	C57BL6J-638850.43	1432	0.715004	C57BL6J-638850	C57BL6J-638850	wt/wt	M	5.60215	8.11237	7.8	GABA	12 HY GABA	094 SCH Six6 Cdc14a Gaba	0436 SCH Six6 Cdc14a Gaba_1	1608 SCH Six6 Cdc14a Gaba_1	#FF3358	#FF6600	#FFBC4D	#00FF8D	#5CCC69	094 SCH | Avp shell
1019171907101720140-2	SCN	13912.1	6887	1019171907101720140-2	C57BL6J-638850.43	1431	0.734083	C57BL6J-638850	C57BL6J-638850	wt/wt	M	5.60942	8.26299	7.8	GABA	12 HY GABA	094 SCH Six6 Cdc14a Gaba	0437 SCH Six6 Cdc14a Gaba_2	1614 SCH Six6 Cdc14a Gaba_2	#FF3358	#FF6600	#FFBC4D	#66110F	#592E66	094 SCH | Cck/C1ql3
1.01917e+18	SCN	15965.3	6763	1.01917e+18	C57BL6J-638850.43	1432	0.705538	C57BL6J-638850	C57BL6J-638850	wt/wt	M	5.3324	8.00906	7.8	GABA	12 HY GABA	094 SCH Six6 Cdc14a Gaba	0436 SCH Six6 Cdc14a Gaba_1	1608 SCH Six6 Cdc14a Gaba_1	#FF3358	#FF6600	#FFBC4D	#00FF8D	#5CCC69	094 SCH | Avp shell
1.01917e+18	SCN	19510.4	6912	1.01917e+18	C57BL6J-638850.43	2509	0.658855	C57BL6J-638850	C57BL6J-638850	wt/wt	M	6.00922	8.10729	7.8	Glut	14 HY Glut	132 AHN-RCH-LHA Otp Fezf1 Glut	0580 AHN-RCH-LHA Otp Fezf1 Glut_2	2345 AHN-RCH-LHA Otp Fezf1 Glut_2	#2B93DF	#AA0DFE	#2E9957	#99455A	#660031	132 AHN-RCH-LHA Otp Fezf1 Glut
1.01917e+18	SCN	14515.6	6874	1.01917e+18	C57BL6J-638850.43	1431	0.747907	C57BL6J-638850	C57BL6J-638850	wt/wt	M	5.37926	8.15373	7.8	GABA	12 HY GABA	094 SCH Six6 Cdc14a Gaba	0437 SCH Six6 Cdc14a Gaba_2	1614 SCH Six6 Cdc14a Gaba_2	#FF3358	#FF6600	#FFBC4D	#66110F	#592E66	094 SCH | Cck/C1ql3
1.01917e+18	SCN	19400.3	7402	1.01917e+18	C57BL6J-638850.43	2509	0.655906	C57BL6J-638850	C57BL6J-638850	wt/wt	M	5.91821	8.07456	7.8	Glut	14 HY Glut	132 AHN-RCH-LHA Otp Fezf1 Glut	0580 AHN-RCH-LHA Otp Fezf1 Glut_2	2345 AHN-RCH-LHA Otp Fezf1 Glut_2	#2B93DF	#AA0DFE	#2E9957	#99455A	#660031	132 AHN-RCH-LHA Otp Fezf1 Glut
1019171907101730219-1	SCN	18212.3	6776	1019171907101730219-1	C57BL6J-638850.43	1435	0.737784	C57BL6J-638850	C57BL6J-638850	wt/wt	M	5.60838	7.84887	7.8	GABA	11 CNU-HYa GABA	090 BST-MPN Six3 Nrgn Gaba	0426 BST-MPN Six3 Nrgn Gaba_7	1566 BST-MPN Six3 Nrgn Gaba_7	#FF3358	#450099	#996600	#0091FF	#3926FF	090 BST-MPN Six3 Nrgn Gaba
1.01917e+18	SCN	19425.1	6983	1.01917e+18	C57BL6J-638850.43	2509	0.695341	C57BL6J-638850	C57BL6J-638850	wt/wt	M	5.96493	8.09923	7.8	Glut	14 HY Glut	132 AHN-RCH-LHA Otp Fezf1 Glut	0580 AHN-RCH-LHA Otp Fezf1 Glut_2	2345 AHN-RCH-LHA Otp Fezf1 Glut_2	#2B93DF	#AA0DFE	#2E9957	#99455A	#660031	132 AHN-RCH-LHA Otp Fezf1 Glut
1019171907101720569-1	SCN	18093.3	7027	1019171907101720569-1	C57BL6J-638850.43	1456	0.664599	C57BL6J-638850	C57BL6J-638850	wt/wt	M	5.75593	7.98585	7.8	GABA	11 CNU-HYa GABA	089 PVR Six3 Sox3 Gaba	0413 PVR Six3 Sox3 Gaba_3	1513 PVR Six3 Sox3 Gaba_3	#FF3358	#450099	#4DFFB4	#AB99FF	#CC6E5C	089 PVR Six3 Sox3 Gaba
1.01917e+18	SCN	17425.9	7172	1.01917e+18	C57BL6J-638850.43	1433	0.646177	C57BL6J-638850	C57BL6J-638850	wt/wt	M	5.83603	8.348	7.8	GABA	12 HY GABA	094 SCH Six6 Cdc14a Gaba	0436 SCH Six6 Cdc14a Gaba_1	1609 SCH Six6 Cdc14a Gaba_1	#FF3358	#FF6600	#FFBC4D	#00FF8D	#1F665D	094 SCH | Cck/C1ql3
1019171907101550308-3	SCN	17187.4	7117	1019171907101550308-3	C57BL6J-638850.43	1433	0.693964	C57BL6J-638850	C57BL6J-638850	wt/wt	M	5.22647	8.21147	7.8	GABA	12 HY GABA	094 SCH Six6 Cdc14a Gaba	0436 SCH Six6 Cdc14a Gaba_1	1609 SCH Six6 Cdc14a Gaba_1	#FF3358	#FF6600	#FFBC4D	#00FF8D	#1F665D	094 SCH | Cck/C1ql3
1019171907101560514-2	SCN	17530.5	7077	1019171907101560514-2	C57BL6J-638850.43	1433	0.747301	C57BL6J-638850	C57BL6J-638850	wt/wt	M	5.3857	7.99146	7.8	GABA	12 HY GABA	094 SCH Six6 Cdc14a Gaba	0436 SCH Six6 Cdc14a Gaba_1	1609 SCH Six6 Cdc14a Gaba_1	#FF3358	#FF6600	#FFBC4D	#00FF8D	#1F665D	094 SCH | Cck/C1ql3
1019171907101720239-2	SCN	17865.9	7112	1019171907101720239-2	C57BL6J-638850.43	1433	0.718035	C57BL6J-638850	C57BL6J-638850	wt/wt	M	5.60886	8.00237	7.8	GABA	12 HY GABA	094 SCH Six6 Cdc14a Gaba	0436 SCH Six6 Cdc14a Gaba_1	1609 SCH Six6 Cdc14a Gaba_1	#FF3358	#FF6600	#FFBC4D	#00FF8D	#1F665D	094 SCH | Cck/C1ql3
1.01917e+18	SCN	13620.1	6958	1.01917e+18	C57BL6J-638850.43	1431	0.667341	C57BL6J-638850	C57BL6J-638850	wt/wt	M	5.52337	8.38874	7.8	GABA	12 HY GABA	094 SCH Six6 Cdc14a Gaba	0437 SCH Six6 Cdc14a Gaba_2	1614 SCH Six6 Cdc14a Gaba_2	#FF3358	#FF6600	#FFBC4D	#66110F	#592E66	094 SCH | Cck/C1ql3
1.01917e+18	SCN	16973.3	6785	1.01917e+18	C57BL6J-638850.43	1433	0.632459	C57BL6J-638850	C57BL6J-638850	wt/wt	M	5.62137	8.03165	7.8	GABA	12 HY GABA	094 SCH Six6 Cdc14a Gaba	0436 SCH Six6 Cdc14a Gaba_1	1609 SCH Six6 Cdc14a Gaba_1	#FF3358	#FF6600	#FFBC4D	#00FF8D	#1F665D	094 SCH | Cck/C1ql3
1019171907101720220-2	SCN	17170.5	6963	1019171907101720220-2	C57BL6J-638850.43	1433	0.784368	C57BL6J-638850	C57BL6J-638850	wt/wt	M	5.60831	8.03145	7.8	GABA	12 HY GABA	094 SCH Six6 Cdc14a Gaba	0436 SCH Six6 Cdc14a Gaba_1	1609 SCH Six6 Cdc14a Gaba_1	#FF3358	#FF6600	#FFBC4D	#00FF8D	#1F665D	094 SCH | Cck/C1ql3
1019171907101560484-2	SCN	17586.5	6997	1019171907101560484-2	C57BL6J-638850.43	1433	0.732169	C57BL6J-638850	C57BL6J-638850	wt/wt	M	5.36056	7.93315	7.8	GABA	12 HY GABA	094 SCH Six6 Cdc14a Gaba	0436 SCH Six6 Cdc14a Gaba_1	1609 SCH Six6 Cdc14a Gaba_1	#FF3358	#FF6600	#FFBC4D	#00FF8D	#1F665D	094 SCH | Cck/C1ql3
1.01917e+18	SCN	19497.9	7374	1.01917e+18	C57BL6J-638850.43	2513	0.62251	C57BL6J-638850	C57BL6J-638850	wt/wt	M	5.91266	8.14948	7.8	Glut	14 HY Glut	132 AHN-RCH-LHA Otp Fezf1 Glut	0580 AHN-RCH-LHA Otp Fezf1 Glut_2	2347 AHN-RCH-LHA Otp Fezf1 Glut_2	#2B93DF	#AA0DFE	#2E9957	#99455A	#002966	132 AHN-RCH-LHA Otp Fezf1 Glut
1019171907101720368-2	SCN	16996	7132	1019171907101720368-2	C57BL6J-638850.43	1433	0.765054	C57BL6J-638850	C57BL6J-638850	wt/wt	M	5.65758	7.99516	7.8	GABA	12 HY GABA	094 SCH Six6 Cdc14a Gaba	0436 SCH Six6 Cdc14a Gaba_1	1609 SCH Six6 Cdc14a Gaba_1	#FF3358	#FF6600	#FFBC4D	#00FF8D	#1F665D	094 SCH | Cck/C1ql3
1.01917e+18	SCN	17773.2	7119	1.01917e+18	C57BL6J-638850.43	1433	0.761083	C57BL6J-638850	C57BL6J-638850	wt/wt	M	5.6459	7.90017	7.8	GABA	12 HY GABA	094 SCH Six6 Cdc14a Gaba	0436 SCH Six6 Cdc14a Gaba_1	1609 SCH Six6 Cdc14a Gaba_1	#FF3358	#FF6600	#FFBC4D	#00FF8D	#1F665D	094 SCH | Cck/C1ql3
1019171907101560482-2	SCN	17805.6	7156	1019171907101560482-2	C57BL6J-638850.43	1433	0.583092	C57BL6J-638850	C57BL6J-638850	wt/wt	M	5.35412	7.92077	7.8	GABA	12 HY GABA	094 SCH Six6 Cdc14a Gaba	0436 SCH Six6 Cdc14a Gaba_1	1609 SCH Six6 Cdc14a Gaba_1	#FF3358	#FF6600	#FFBC4D	#00FF8D	#1F665D	094 SCH | Cck/C1ql3
1019171907101560549-1	SCN	17788.5	7117	1019171907101560549-1	C57BL6J-638850.43	1433	0.720886	C57BL6J-638850	C57BL6J-638850	wt/wt	M	5.39276	7.94841	7.8	GABA	12 HY GABA	094 SCH Six6 Cdc14a Gaba	0436 SCH Six6 Cdc14a Gaba_1	1609 SCH Six6 Cdc14a Gaba_1	#FF3358	#FF6600	#FFBC4D	#00FF8D	#1F665D	094 SCH | Cck/C1ql3
1.01917e+18	SCN	18191.1	6691	1.01917e+18	C57BL6J-638850.43	1442	0.73559	C57BL6J-638850	C57BL6J-638850	wt/wt	M	6.10107	8.32943	7.8	GABA	11 CNU-HYa GABA	090 BST-MPN Six3 Nrgn Gaba	0426 BST-MPN Six3 Nrgn Gaba_7	1568 BST-MPN Six3 Nrgn Gaba_7	#FF3358	#450099	#996600	#0091FF	#26FFC5	090 BST-MPN Six3 Nrgn Gaba
1.01917e+18	SCN	19417.6	7196	1.01917e+18	C57BL6J-638850.43	2509	0.725204	C57BL6J-638850	C57BL6J-638850	wt/wt	M	6.04671	8.24406	7.8	Glut	14 HY Glut	132 AHN-RCH-LHA Otp Fezf1 Glut	0580 AHN-RCH-LHA Otp Fezf1 Glut_2	2345 AHN-RCH-LHA Otp Fezf1 Glut_2	#2B93DF	#AA0DFE	#2E9957	#99455A	#660031	132 AHN-RCH-LHA Otp Fezf1 Glut
1019171907101550521-2	SCN	16971	7167	1019171907101550521-2	C57BL6J-638850.43	1425	0.681462	C57BL6J-638850	C57BL6J-638850	wt/wt	M	5.28911	8.12709	7.8	GABA	12 HY GABA	094 SCH Six6 Cdc14a Gaba	0437 SCH Six6 Cdc14a Gaba_2	1611 SCH Six6 Cdc14a Gaba_2	#FF3358	#FF6600	#FFBC4D	#66110F	#41663D	094 SCH | Cck/C1ql3
1.01917e+18	SCN	15078.6	6755	1.01917e+18	C57BL6J-638850.43	1432	0.830588	C57BL6J-638850	C57BL6J-638850	wt/wt	M	5.65097	8.13487	7.8	GABA	12 HY GABA	094 SCH Six6 Cdc14a Gaba	0436 SCH Six6 Cdc14a Gaba_1	1608 SCH Six6 Cdc14a Gaba_1	#FF3358	#FF6600	#FFBC4D	#00FF8D	#5CCC69	094 SCH | Avp shell
1019171907101560551-1	SCN	17968.1	7064	1019171907101560551-1	C57BL6J-638850.43	1433	0.757848	C57BL6J-638850	C57BL6J-638850	wt/wt	M	5.39074	7.88222	7.8	GABA	12 HY GABA	094 SCH Six6 Cdc14a Gaba	0436 SCH Six6 Cdc14a Gaba_1	1609 SCH Six6 Cdc14a Gaba_1	#FF3358	#FF6600	#FFBC4D	#00FF8D	#1F665D	094 SCH | Cck/C1ql3
1019171907101720275-1	SCN	16083.5	6620	1019171907101720275-1	C57BL6J-638850.43	1432	0.825225	C57BL6J-638850	C57BL6J-638850	wt/wt	M	5.63655	8.0939	7.8	GABA	12 HY GABA	094 SCH Six6 Cdc14a Gaba	0436 SCH Six6 Cdc14a Gaba_1	1608 SCH Six6 Cdc14a Gaba_1	#FF3358	#FF6600	#FFBC4D	#00FF8D	#5CCC69	094 SCH | Avp shell
1.01917e+18	SCN	19497.3	7235	1.01917e+18	C57BL6J-638850.43	2509	0.706795	C57BL6J-638850	C57BL6J-638850	wt/wt	M	6.07128	8.21161	7.8	Glut	14 HY Glut	132 AHN-RCH-LHA Otp Fezf1 Glut	0580 AHN-RCH-LHA Otp Fezf1 Glut_2	2345 AHN-RCH-LHA Otp Fezf1 Glut_2	#2B93DF	#AA0DFE	#2E9957	#99455A	#660031	132 AHN-RCH-LHA Otp Fezf1 Glut
1019171907101720142-1	SCN	15960.1	6503	1019171907101720142-1	C57BL6J-638850.43	1432	0.758494	C57BL6J-638850	C57BL6J-638850	wt/wt	M	5.58977	8.09031	7.8	GABA	12 HY GABA	094 SCH Six6 Cdc14a Gaba	0436 SCH Six6 Cdc14a Gaba_1	1608 SCH Six6 Cdc14a Gaba_1	#FF3358	#FF6600	#FFBC4D	#00FF8D	#5CCC69	094 SCH | Avp shell
1019171907101550231-2	SCN	16180.2	7069	1019171907101550231-2	C57BL6J-638850.43	1433	0.681525	C57BL6J-638850	C57BL6J-638850	wt/wt	M	5.18756	8.2079	7.8	GABA	12 HY GABA	094 SCH Six6 Cdc14a Gaba	0436 SCH Six6 Cdc14a Gaba_1	1609 SCH Six6 Cdc14a Gaba_1	#FF3358	#FF6600	#FFBC4D	#00FF8D	#1F665D	094 SCH | Avp shell
1019171907101720331-1	SCN	16229.6	6638	1019171907101720331-1	C57BL6J-638850.43	1432	0.776858	C57BL6J-638850	C57BL6J-638850	wt/wt	M	5.643	7.98895	7.8	GABA	12 HY GABA	094 SCH Six6 Cdc14a Gaba	0436 SCH Six6 Cdc14a Gaba_1	1608 SCH Six6 Cdc14a Gaba_1	#FF3358	#FF6600	#FFBC4D	#00FF8D	#5CCC69	094 SCH | Avp shell
1.01917e+18	SCN	16696.3	6854	1.01917e+18	C57BL6J-638850.43	1428	0.721959	C57BL6J-638850	C57BL6J-638850	wt/wt	M	5.59033	8.07299	7.8	GABA	12 HY GABA	094 SCH Six6 Cdc14a Gaba	0436 SCH Six6 Cdc14a Gaba_1	1606 SCH Six6 Cdc14a Gaba_1	#FF3358	#FF6600	#FFBC4D	#00FF8D	#5F0066	094 SCH | Avp shell
1019171907101550693-1	SCN	15264.2	6742	1019171907101550693-1	C57BL6J-638850.43	1432	0.729499	C57BL6J-638850	C57BL6J-638850	wt/wt	M	5.33994	8.03579	7.8	GABA	12 HY GABA	094 SCH Six6 Cdc14a Gaba	0436 SCH Six6 Cdc14a Gaba_1	1608 SCH Six6 Cdc14a Gaba_1	#FF3358	#FF6600	#FFBC4D	#00FF8D	#5CCC69	094 SCH | Avp shell
1019171907101550777-1	SCN	16336.6	7249	1019171907101550777-1	C57BL6J-638850.43	1432	0.644591	C57BL6J-638850	C57BL6J-638850	wt/wt	M	5.38378	8.08539	7.8	GABA	12 HY GABA	094 SCH Six6 Cdc14a Gaba	0436 SCH Six6 Cdc14a Gaba_1	1608 SCH Six6 Cdc14a Gaba_1	#FF3358	#FF6600	#FFBC4D	#00FF8D	#5CCC69	094 SCH | Avp shell
1.01917e+18	SCN	15509.7	6620	1.01917e+18	C57BL6J-638850.43	1432	0.722812	C57BL6J-638850	C57BL6J-638850	wt/wt	M	5.64563	8.02625	7.8	GABA	12 HY GABA	094 SCH Six6 Cdc14a Gaba	0436 SCH Six6 Cdc14a Gaba_1	1608 SCH Six6 Cdc14a Gaba_1	#FF3358	#FF6600	#FFBC4D	#00FF8D	#5CCC69	094 SCH | Avp shell
1019171907101720330-1	SCN	15712.4	6729	1019171907101720330-1	C57BL6J-638850.43	1432	0.770331	C57BL6J-638850	C57BL6J-638850	wt/wt	M	5.6458	8.01056	7.8	GABA	12 HY GABA	094 SCH Six6 Cdc14a Gaba	0436 SCH Six6 Cdc14a Gaba_1	1608 SCH Six6 Cdc14a Gaba_1	#FF3358	#FF6600	#FFBC4D	#00FF8D	#5CCC69	094 SCH | Avp shell
1019171907101730289-1	SCN	16369.8	7014	1019171907101730289-1	C57BL6J-638850.43	1433	0.701717	C57BL6J-638850	C57BL6J-638850	wt/wt	M	5.65173	7.86092	7.8	GABA	12 HY GABA	094 SCH Six6 Cdc14a Gaba	0436 SCH Six6 Cdc14a Gaba_1	1609 SCH Six6 Cdc14a Gaba_1	#FF3358	#FF6600	#FFBC4D	#00FF8D	#1F665D	094 SCH | Cck/C1ql3
1019171907101720342-1	SCN	18383.8	7173	1019171907101720342-1	C57BL6J-638850.43	1433	0.529068	C57BL6J-638850	C57BL6J-638850	wt/wt	M	5.65968	8.05863	7.8	GABA	12 HY GABA	094 SCH Six6 Cdc14a Gaba	0436 SCH Six6 Cdc14a Gaba_1	1609 SCH Six6 Cdc14a Gaba_1	#FF3358	#FF6600	#FFBC4D	#00FF8D	#1F665D	094 SCH | Cck/C1ql3
1019171907101720260-1	SCN	16567.2	6866	1019171907101720260-1	C57BL6J-638850.43	1432	0.767713	C57BL6J-638850	C57BL6J-638850	wt/wt	M	5.62459	8.06301	7.8	GABA	12 HY GABA	094 SCH Six6 Cdc14a Gaba	0436 SCH Six6 Cdc14a Gaba_1	1608 SCH Six6 Cdc14a Gaba_1	#FF3358	#FF6600	#FFBC4D	#00FF8D	#5CCC69	094 SCH | Avp shell
1019171907101550824-1	SCN	16102.2	6686	1019171907101550824-1	C57BL6J-638850.43	1432	0.813581	C57BL6J-638850	C57BL6J-638850	wt/wt	M	5.40257	8.06748	7.8	GABA	12 HY GABA	094 SCH Six6 Cdc14a Gaba	0436 SCH Six6 Cdc14a Gaba_1	1608 SCH Six6 Cdc14a Gaba_1	#FF3358	#FF6600	#FFBC4D	#00FF8D	#5CCC69	094 SCH | Avp shell
1.01917e+18	SCN	15151.9	6797	1.01917e+18	C57BL6J-638850.43	1432	0.781398	C57BL6J-638850	C57BL6J-638850	wt/wt	M	5.32444	8.11202	7.8	GABA	12 HY GABA	094 SCH Six6 Cdc14a Gaba	0436 SCH Six6 Cdc14a Gaba_1	1608 SCH Six6 Cdc14a Gaba_1	#FF3358	#FF6600	#FFBC4D	#00FF8D	#5CCC69	094 SCH | Avp shell
1.01917e+18	SCN	15006.4	6884	1.01917e+18	C57BL6J-638850.43	1432	0.738516	C57BL6J-638850	C57BL6J-638850	wt/wt	M	5.36843	8.16353	7.8	GABA	12 HY GABA	094 SCH Six6 Cdc14a Gaba	0436 SCH Six6 Cdc14a Gaba_1	1608 SCH Six6 Cdc14a Gaba_1	#FF3358	#FF6600	#FFBC4D	#00FF8D	#5CCC69	094 SCH | Avp shell
1019171907101550708-1	SCN	15691.2	6815	1019171907101550708-1	C57BL6J-638850.43	1432	0.721883	C57BL6J-638850	C57BL6J-638850	wt/wt	M	5.35147	8.07561	7.8	GABA	12 HY GABA	094 SCH Six6 Cdc14a Gaba	0436 SCH Six6 Cdc14a Gaba_1	1608 SCH Six6 Cdc14a Gaba_1	#FF3358	#FF6600	#FFBC4D	#00FF8D	#5CCC69	094 SCH | Avp shell
1019171907101720410-1	SCN	16894.5	6937	1019171907101720410-1	C57BL6J-638850.43	1433	0.688832	C57BL6J-638850	C57BL6J-638850	wt/wt	M	5.67382	8.02306	7.8	GABA	12 HY GABA	094 SCH Six6 Cdc14a Gaba	0436 SCH Six6 Cdc14a Gaba_1	1609 SCH Six6 Cdc14a Gaba_1	#FF3358	#FF6600	#FFBC4D	#00FF8D	#1F665D	094 SCH | Cck/C1ql3
1019171907101720416-2	SCN	17365.6	7150	1019171907101720416-2	C57BL6J-638850.43	1433	0.649551	C57BL6J-638850	C57BL6J-638850	wt/wt	M	5.69149	8.11526	7.8	GABA	12 HY GABA	094 SCH Six6 Cdc14a Gaba	0436 SCH Six6 Cdc14a Gaba_1	1609 SCH Six6 Cdc14a Gaba_1	#FF3358	#FF6600	#FFBC4D	#00FF8D	#1F665D	094 SCH | Cck/C1ql3
1019171907101730259-2	SCN	17730.8	6854	1019171907101730259-2	C57BL6J-638850.43	1433	0.746168	C57BL6J-638850	C57BL6J-638850	wt/wt	M	5.64313	7.91263	7.8	GABA	12 HY GABA	094 SCH Six6 Cdc14a Gaba	0436 SCH Six6 Cdc14a Gaba_1	1609 SCH Six6 Cdc14a Gaba_1	#FF3358	#FF6600	#FFBC4D	#00FF8D	#1F665D	094 SCH | Cck/C1ql3
1019171907201560356-1	SCN	16302.8	7308	1019171907201560356-1	C57BL6J-638850.43	1425	0.579731	C57BL6J-638850	C57BL6J-638850	wt/wt	M	5.30231	8.03225	7.8	GABA	12 HY GABA	094 SCH Six6 Cdc14a Gaba	0437 SCH Six6 Cdc14a Gaba_2	1611 SCH Six6 Cdc14a Gaba_2	#FF3358	#FF6600	#FFBC4D	#66110F	#41663D	094 SCH | Cck/C1ql3
1019171907101550628-1	SCN	16984.6	7313	1019171907101550628-1	C57BL6J-638850.43	1425	0.538938	C57BL6J-638850	C57BL6J-638850	wt/wt	M	5.31695	8.08799	7.8	GABA	12 HY GABA	094 SCH Six6 Cdc14a Gaba	0437 SCH Six6 Cdc14a Gaba_2	1611 SCH Six6 Cdc14a Gaba_2	#FF3358	#FF6600	#FFBC4D	#66110F	#41663D	094 SCH | Cck/C1ql3
1019171907101720404-1	SCN	15435.8	6683	1019171907101720404-1	C57BL6J-638850.43	1432	0.791077	C57BL6J-638850	C57BL6J-638850	wt/wt	M	5.68161	8.05713	7.8	GABA	12 HY GABA	094 SCH Six6 Cdc14a Gaba	0436 SCH Six6 Cdc14a Gaba_1	1608 SCH Six6 Cdc14a Gaba_1	#FF3358	#FF6600	#FFBC4D	#00FF8D	#5CCC69	094 SCH | Avp shell
1019171907101560485-2	SCN	15257	6758	1019171907101560485-2	C57BL6J-638850.43	1432	0.702542	C57BL6J-638850	C57BL6J-638850	wt/wt	M	5.36342	7.96579	7.8	GABA	12 HY GABA	094 SCH Six6 Cdc14a Gaba	0436 SCH Six6 Cdc14a Gaba_1	1608 SCH Six6 Cdc14a Gaba_1	#FF3358	#FF6600	#FFBC4D	#00FF8D	#5CCC69	094 SCH | Avp shell
1019171907101720321-1	SCN	17915.4	7089	1019171907101720321-1	C57BL6J-638850.43	1433	0.751993	C57BL6J-638850	C57BL6J-638850	wt/wt	M	5.63376	7.97472	7.8	GABA	12 HY GABA	094 SCH Six6 Cdc14a Gaba	0436 SCH Six6 Cdc14a Gaba_1	1609 SCH Six6 Cdc14a Gaba_1	#FF3358	#FF6600	#FFBC4D	#00FF8D	#1F665D	094 SCH | Cck/C1ql3
1019171907101550222-2	SCN	17709.8	7195	1019171907101550222-2	C57BL6J-638850.43	1425	0.628975	C57BL6J-638850	C57BL6J-638850	wt/wt	M	5.18785	8.24206	7.8	GABA	12 HY GABA	094 SCH Six6 Cdc14a Gaba	0437 SCH Six6 Cdc14a Gaba_2	1611 SCH Six6 Cdc14a Gaba_2	#FF3358	#FF6600	#FFBC4D	#66110F	#41663D	094 SCH | Cck/C1ql3
1.01917e+18	SCN	15113.1	6683	1.01917e+18	C57BL6J-638850.43	1432	0.728184	C57BL6J-638850	C57BL6J-638850	wt/wt	M	5.31339	8.09717	7.8	GABA	12 HY GABA	094 SCH Six6 Cdc14a Gaba	0436 SCH Six6 Cdc14a Gaba_1	1608 SCH Six6 Cdc14a Gaba_1	#FF3358	#FF6600	#FFBC4D	#00FF8D	#5CCC69	094 SCH | Avp shell
1019171907101560454-3	SCN	16921.4	6928	1019171907101560454-3	C57BL6J-638850.43	1428	0.731723	C57BL6J-638850	C57BL6J-638850	wt/wt	M	5.34221	7.93812	7.8	GABA	12 HY GABA	094 SCH Six6 Cdc14a Gaba	0436 SCH Six6 Cdc14a Gaba_1	1606 SCH Six6 Cdc14a Gaba_1	#FF3358	#FF6600	#FFBC4D	#00FF8D	#5F0066	094 SCH | Avp shell
1019171907101720279-2	SCN	15045.9	6755	1019171907101720279-2	C57BL6J-638850.43	1432	0.790654	C57BL6J-638850	C57BL6J-638850	wt/wt	M	5.64134	8.11751	7.8	GABA	12 HY GABA	094 SCH Six6 Cdc14a Gaba	0436 SCH Six6 Cdc14a Gaba_1	1608 SCH Six6 Cdc14a Gaba_1	#FF3358	#FF6600	#FFBC4D	#00FF8D	#5CCC69	094 SCH | Avp shell
1019171907101560457-2	SCN	15067.5	6823	1019171907101560457-2	C57BL6J-638850.43	1432	0.775065	C57BL6J-638850	C57BL6J-638850	wt/wt	M	5.35419	8.00631	7.8	GABA	12 HY GABA	094 SCH Six6 Cdc14a Gaba	0436 SCH Six6 Cdc14a Gaba_1	1608 SCH Six6 Cdc14a Gaba_1	#FF3358	#FF6600	#FFBC4D	#00FF8D	#5CCC69	094 SCH | Avp shell
1.01917e+18	SCN	19187	7073	1.01917e+18	C57BL6J-638850.43	1627	0.615573	C57BL6J-638850	C57BL6J-638850	wt/wt	M	5.29318	7.9634	7.8	GABA	12 HY GABA	098 AHN-SBPV-PVHd Pdrm12 Gaba	0450 AHN-SBPV-PVHd Pdrm12 Gaba_5	1671 AHN-SBPV-PVHd Pdrm12 Gaba_5	#FF3358	#FF6600	#BB7ACC	#660012	#5C6600	098 AHN-SBPV-PVHd Pdrm12 Gaba
1019171907101560428-3	SCN	16083.3	6911	1019171907101560428-3	C57BL6J-638850.43	1432	0.762342	C57BL6J-638850	C57BL6J-638850	wt/wt	M	5.33196	7.98559	7.8	GABA	12 HY GABA	094 SCH Six6 Cdc14a Gaba	0436 SCH Six6 Cdc14a Gaba_1	1608 SCH Six6 Cdc14a Gaba_1	#FF3358	#FF6600	#FFBC4D	#00FF8D	#5CCC69	094 SCH | Avp shell
1019171907101550548-1	SCN	16125.6	6978	1019171907101550548-1	C57BL6J-638850.43	1432	0.761743	C57BL6J-638850	C57BL6J-638850	wt/wt	M	5.30048	8.13554	7.8	GABA	12 HY GABA	094 SCH Six6 Cdc14a Gaba	0436 SCH Six6 Cdc14a Gaba_1	1608 SCH Six6 Cdc14a Gaba_1	#FF3358	#FF6600	#FFBC4D	#00FF8D	#5CCC69	094 SCH | Avp shell
1019171907101550786-1	SCN	15319.9	6743	1019171907101550786-1	C57BL6J-638850.43	1432	0.753884	C57BL6J-638850	C57BL6J-638850	wt/wt	M	5.38422	8.06671	7.8	GABA	12 HY GABA	094 SCH Six6 Cdc14a Gaba	0436 SCH Six6 Cdc14a Gaba_1	1608 SCH Six6 Cdc14a Gaba_1	#FF3358	#FF6600	#FFBC4D	#00FF8D	#5CCC69	094 SCH | Avp shell
1019171907101720271-1	SCN	15922.5	6746	1019171907101720271-1	C57BL6J-638850.43	1432	0.800687	C57BL6J-638850	C57BL6J-638850	wt/wt	M	5.63269	8.07196	7.8	GABA	12 HY GABA	094 SCH Six6 Cdc14a Gaba	0436 SCH Six6 Cdc14a Gaba_1	1608 SCH Six6 Cdc14a Gaba_1	#FF3358	#FF6600	#FFBC4D	#00FF8D	#5CCC69	094 SCH | Avp shell
1019171907101550491-2	SCN	15777.4	6722	1019171907101550491-2	C57BL6J-638850.43	1432	0.718385	C57BL6J-638850	C57BL6J-638850	wt/wt	M	5.27452	8.10114	7.8	GABA	12 HY GABA	094 SCH Six6 Cdc14a Gaba	0436 SCH Six6 Cdc14a Gaba_1	1608 SCH Six6 Cdc14a Gaba_1	#FF3358	#FF6600	#FFBC4D	#00FF8D	#5CCC69	094 SCH | Avp shell
1.01917e+18	SCN	19268.7	7239	1.01917e+18	C57BL6J-638850.43	2509	0.637367	C57BL6J-638850	C57BL6J-638850	wt/wt	M	5.9394	8.22916	7.8	Glut	14 HY Glut	132 AHN-RCH-LHA Otp Fezf1 Glut	0580 AHN-RCH-LHA Otp Fezf1 Glut_2	2345 AHN-RCH-LHA Otp Fezf1 Glut_2	#2B93DF	#AA0DFE	#2E9957	#99455A	#660031	132 AHN-RCH-LHA Otp Fezf1 Glut
1019171907101550144-2	SCN	16064.3	6884	1019171907101550144-2	C57BL6J-638850.43	1432	0.776726	C57BL6J-638850	C57BL6J-638850	wt/wt	M	5.15968	8.39976	7.8	GABA	12 HY GABA	094 SCH Six6 Cdc14a Gaba	0436 SCH Six6 Cdc14a Gaba_1	1608 SCH Six6 Cdc14a Gaba_1	#FF3358	#FF6600	#FFBC4D	#00FF8D	#5CCC69	094 SCH | Avp shell
1.01917e+18	SCN	14676.2	6523	1.01917e+18	C57BL6J-638850.43	1432	0.534869	C57BL6J-638850	C57BL6J-638850	wt/wt	M	5.15155	8.38054	7.8	GABA	12 HY GABA	094 SCH Six6 Cdc14a Gaba	0436 SCH Six6 Cdc14a Gaba_1	1608 SCH Six6 Cdc14a Gaba_1	#FF3358	#FF6600	#FFBC4D	#00FF8D	#5CCC69	094 SCH | Avp shell
1.01917e+18	SCN	15784.1	6638	1.01917e+18	C57BL6J-638850.43	1432	0.71631	C57BL6J-638850	C57BL6J-638850	wt/wt	M	5.42841	8.14319	7.8	GABA	12 HY GABA	094 SCH Six6 Cdc14a Gaba	0436 SCH Six6 Cdc14a Gaba_1	1608 SCH Six6 Cdc14a Gaba_1	#FF3358	#FF6600	#FFBC4D	#00FF8D	#5CCC69	094 SCH | Avp shell
1.01917e+18	SCN	18249.9	6690	1.01917e+18	C57BL6J-638850.43	1435	0.724276	C57BL6J-638850	C57BL6J-638850	wt/wt	M	5.84083	8.00507	7.8	GABA	11 CNU-HYa GABA	090 BST-MPN Six3 Nrgn Gaba	0426 BST-MPN Six3 Nrgn Gaba_7	1566 BST-MPN Six3 Nrgn Gaba_7	#FF3358	#450099	#996600	#0091FF	#3926FF	090 BST-MPN Six3 Nrgn Gaba
1019171907101560424-2	SCN	17966.5	6996	1019171907101560424-2	C57BL6J-638850.43	1433	0.675504	C57BL6J-638850	C57BL6J-638850	wt/wt	M	5.32702	7.96889	7.8	GABA	12 HY GABA	094 SCH Six6 Cdc14a Gaba	0436 SCH Six6 Cdc14a Gaba_1	1609 SCH Six6 Cdc14a Gaba_1	#FF3358	#FF6600	#FFBC4D	#00FF8D	#1F665D	094 SCH | Cck/C1ql3
1019171907101720377-1	SCN	14752.8	6727	1019171907101720377-1	C57BL6J-638850.43	1432	0.734327	C57BL6J-638850	C57BL6J-638850	wt/wt	M	5.69907	8.25016	7.8	GABA	12 HY GABA	094 SCH Six6 Cdc14a Gaba	0436 SCH Six6 Cdc14a Gaba_1	1608 SCH Six6 Cdc14a Gaba_1	#FF3358	#FF6600	#FFBC4D	#00FF8D	#5CCC69	094 SCH | Avp shell
1019171907101550721-1	SCN	16819.8	6847	1019171907101550721-1	C57BL6J-638850.43	1432	0.707657	C57BL6J-638850	C57BL6J-638850	wt/wt	M	5.3516	8.04619	7.8	GABA	12 HY GABA	094 SCH Six6 Cdc14a Gaba	0436 SCH Six6 Cdc14a Gaba_1	1608 SCH Six6 Cdc14a Gaba_1	#FF3358	#FF6600	#FFBC4D	#00FF8D	#5CCC69	094 SCH | Avp shell
1.01917e+18	SCN	15284.9	6816	1.01917e+18	C57BL6J-638850.43	1432	0.801218	C57BL6J-638850	C57BL6J-638850	wt/wt	M	5.33447	8.20361	7.8	GABA	12 HY GABA	094 SCH Six6 Cdc14a Gaba	0436 SCH Six6 Cdc14a Gaba_1	1608 SCH Six6 Cdc14a Gaba_1	#FF3358	#FF6600	#FFBC4D	#00FF8D	#5CCC69	094 SCH | Avp shell
1.01917e+18	SCN	20223.1	7309	1.01917e+18	C57BL6J-638850.43	2512	0.518487	C57BL6J-638850	C57BL6J-638850	wt/wt	M	6.00243	8.20949	7.8	Glut	14 HY Glut	132 AHN-RCH-LHA Otp Fezf1 Glut	0580 AHN-RCH-LHA Otp Fezf1 Glut_2	2346 AHN-RCH-LHA Otp Fezf1 Glut_2	#2B93DF	#AA0DFE	#2E9957	#99455A	#CC7AA1	132 AHN-RCH-LHA Otp Fezf1 Glut
1019171907101720585-1	SCN	15382.7	6743	1019171907101720585-1	C57BL6J-638850.43	1432	0.763037	C57BL6J-638850	C57BL6J-638850	wt/wt	M	5.82987	8.38246	7.8	GABA	12 HY GABA	094 SCH Six6 Cdc14a Gaba	0436 SCH Six6 Cdc14a Gaba_1	1608 SCH Six6 Cdc14a Gaba_1	#FF3358	#FF6600	#FFBC4D	#00FF8D	#5CCC69	094 SCH | Avp shell
1019171907101550715-1	SCN	15696.9	6601	1019171907101550715-1	C57BL6J-638850.43	1432	0.805894	C57BL6J-638850	C57BL6J-638850	wt/wt	M	5.35491	8.09318	7.8	GABA	12 HY GABA	094 SCH Six6 Cdc14a Gaba	0436 SCH Six6 Cdc14a Gaba_1	1608 SCH Six6 Cdc14a Gaba_1	#FF3358	#FF6600	#FFBC4D	#00FF8D	#5CCC69	094 SCH | Avp shell
1019171907101560434-3	SCN	15018.2	6719	1019171907101560434-3	C57BL6J-638850.43	1432	0.743961	C57BL6J-638850	C57BL6J-638850	wt/wt	M	5.33459	7.99664	7.8	GABA	12 HY GABA	094 SCH Six6 Cdc14a Gaba	0436 SCH Six6 Cdc14a Gaba_1	1608 SCH Six6 Cdc14a Gaba_1	#FF3358	#FF6600	#FFBC4D	#00FF8D	#5CCC69	094 SCH | Avp shell
1019171907101560452-1	SCN	16456.9	6790	1019171907101560452-1	C57BL6J-638850.43	1432	0.746135	C57BL6J-638850	C57BL6J-638850	wt/wt	M	5.34642	7.98887	7.8	GABA	12 HY GABA	094 SCH Six6 Cdc14a Gaba	0436 SCH Six6 Cdc14a Gaba_1	1608 SCH Six6 Cdc14a Gaba_1	#FF3358	#FF6600	#FFBC4D	#00FF8D	#5CCC69	094 SCH | Avp shell
1019171907101560494-1	SCN	15407.4	6734	1019171907101560494-1	C57BL6J-638850.43	1432	0.677563	C57BL6J-638850	C57BL6J-638850	wt/wt	M	5.37129	7.97639	7.8	GABA	12 HY GABA	094 SCH Six6 Cdc14a Gaba	0436 SCH Six6 Cdc14a Gaba_1	1608 SCH Six6 Cdc14a Gaba_1	#FF3358	#FF6600	#FFBC4D	#00FF8D	#5CCC69	094 SCH | Avp shell
1.01917e+18	SCN	18627.4	6977	1.01917e+18	C57BL6J-638850.43	1435	0.739	C57BL6J-638850	C57BL6J-638850	wt/wt	M	6.04771	8.26477	7.8	GABA	11 CNU-HYa GABA	090 BST-MPN Six3 Nrgn Gaba	0426 BST-MPN Six3 Nrgn Gaba_7	1566 BST-MPN Six3 Nrgn Gaba_7	#FF3358	#450099	#996600	#0091FF	#3926FF	090 BST-MPN Six3 Nrgn Gaba
1.01917e+18	SCN	16756.5	6761	1.01917e+18	C57BL6J-638850.43	1432	0.735178	C57BL6J-638850	C57BL6J-638850	wt/wt	M	5.2916	8.07077	7.8	GABA	12 HY GABA	094 SCH Six6 Cdc14a Gaba	0436 SCH Six6 Cdc14a Gaba_1	1608 SCH Six6 Cdc14a Gaba_1	#FF3358	#FF6600	#FFBC4D	#00FF8D	#5CCC69	094 SCH | Avp shell
1019171907101730238-1	SCN	16472.8	6770	1019171907101730238-1	C57BL6J-638850.43	1432	0.681609	C57BL6J-638850	C57BL6J-638850	wt/wt	M	5.6312	7.91521	7.8	GABA	12 HY GABA	094 SCH Six6 Cdc14a Gaba	0436 SCH Six6 Cdc14a Gaba_1	1608 SCH Six6 Cdc14a Gaba_1	#FF3358	#FF6600	#FFBC4D	#00FF8D	#5CCC69	094 SCH | Avp shell
1019171907101890060-2	SCN	20261.9	7261	1019171907101890060-2	C57BL6J-638850.43	2509	0.637819	C57BL6J-638850	C57BL6J-638850	wt/wt	M	6.07801	8.20054	7.8	Glut	14 HY Glut	132 AHN-RCH-LHA Otp Fezf1 Glut	0580 AHN-RCH-LHA Otp Fezf1 Glut_2	2345 AHN-RCH-LHA Otp Fezf1 Glut_2	#2B93DF	#AA0DFE	#2E9957	#99455A	#660031	132 AHN-RCH-LHA Otp Fezf1 Glut
1019171907101560586-1	SCN	15723.8	6781	1019171907101560586-1	C57BL6J-638850.43	1432	0.686517	C57BL6J-638850	C57BL6J-638850	wt/wt	M	5.41307	7.9226	7.8	GABA	12 HY GABA	094 SCH Six6 Cdc14a Gaba	0436 SCH Six6 Cdc14a Gaba_1	1608 SCH Six6 Cdc14a Gaba_1	#FF3358	#FF6600	#FFBC4D	#00FF8D	#5CCC69	094 SCH | Avp shell
1019171907101550643-1	SCN	15294.6	6617	1019171907101550643-1	C57BL6J-638850.43	1432	0.713948	C57BL6J-638850	C57BL6J-638850	wt/wt	M	5.31594	8.02568	7.8	GABA	12 HY GABA	094 SCH Six6 Cdc14a Gaba	0436 SCH Six6 Cdc14a Gaba_1	1608 SCH Six6 Cdc14a Gaba_1	#FF3358	#FF6600	#FFBC4D	#00FF8D	#5CCC69	094 SCH | Avp shell
1019171907101550203-1	SCN	15297.9	6772	1019171907101550203-1	C57BL6J-638850.43	1432	0.74182	C57BL6J-638850	C57BL6J-638850	wt/wt	M	5.1836	8.32275	7.8	GABA	12 HY GABA	094 SCH Six6 Cdc14a Gaba	0436 SCH Six6 Cdc14a Gaba_1	1608 SCH Six6 Cdc14a Gaba_1	#FF3358	#FF6600	#FFBC4D	#00FF8D	#5CCC69	094 SCH | Avp shell
1.01917e+18	SCN	19873.1	7312	1.01917e+18	C57BL6J-638850.43	2509	0.688561	C57BL6J-638850	C57BL6J-638850	wt/wt	M	6.01523	8.20321	7.8	Glut	14 HY Glut	132 AHN-RCH-LHA Otp Fezf1 Glut	0580 AHN-RCH-LHA Otp Fezf1 Glut_2	2345 AHN-RCH-LHA Otp Fezf1 Glut_2	#2B93DF	#AA0DFE	#2E9957	#99455A	#660031	132 AHN-RCH-LHA Otp Fezf1 Glut
1019171907101720272-2	SCN	15708.4	6564	1019171907101720272-2	C57BL6J-638850.43	1432	0.75616	C57BL6J-638850	C57BL6J-638850	wt/wt	M	5.63124	8.05177	7.8	GABA	12 HY GABA	094 SCH Six6 Cdc14a Gaba	0436 SCH Six6 Cdc14a Gaba_1	1608 SCH Six6 Cdc14a Gaba_1	#FF3358	#FF6600	#FFBC4D	#00FF8D	#5CCC69	094 SCH | Avp shell
1019171907101890069-2	SCN	20414.8	7263	1019171907101890069-2	C57BL6J-638850.43	2509	0.684868	C57BL6J-638850	C57BL6J-638850	wt/wt	M	6.0939	8.24647	7.8	Glut	14 HY Glut	132 AHN-RCH-LHA Otp Fezf1 Glut	0580 AHN-RCH-LHA Otp Fezf1 Glut_2	2345 AHN-RCH-LHA Otp Fezf1 Glut_2	#2B93DF	#AA0DFE	#2E9957	#99455A	#660031	132 AHN-RCH-LHA Otp Fezf1 Glut
1.01917e+18	SCN	18784	7228	1.01917e+18	C57BL6J-638850.43	2509	0.616857	C57BL6J-638850	C57BL6J-638850	wt/wt	M	6.0031	8.15341	7.8	Glut	14 HY Glut	132 AHN-RCH-LHA Otp Fezf1 Glut	0580 AHN-RCH-LHA Otp Fezf1 Glut_2	2345 AHN-RCH-LHA Otp Fezf1 Glut_2	#2B93DF	#AA0DFE	#2E9957	#99455A	#660031	132 AHN-RCH-LHA Otp Fezf1 Glut
1019171907101550197-1	SCN	18579.9	7454	1019171907101550197-1	C57BL6J-638850.43	2530	0.685968	C57BL6J-638850	C57BL6J-638850	wt/wt	M	5.1583	8.18384	7.8	Glut	14 HY Glut	132 AHN-RCH-LHA Otp Fezf1 Glut	0580 AHN-RCH-LHA Otp Fezf1 Glut_2	2349 AHN-RCH-LHA Otp Fezf1 Glut_2	#2B93DF	#AA0DFE	#2E9957	#99455A	#739EFF	132 AHN-RCH-LHA Otp Fezf1 Glut
1019171907101730324-2	SCN	18162.1	7135	1019171907101730324-2	C57BL6J-638850.43	1437	0.646207	C57BL6J-638850	C57BL6J-638850	wt/wt	M	5.66587	7.83149	7.8	GABA	12 HY GABA	097 PVHd-SBPV Six3 Prox1 Gaba	0445 PVHd-SBPV Six3 Prox1 Gaba_4	1642 PVHd-SBPV Six3 Prox1 Gaba_4	#FF3358	#FF6600	#2E3D66	#48663D	#CC3D5F	097 PVHd-SBPV Six3 Prox1 Gaba
1019171907101550219-2	SCN	18240.3	7226	1019171907101550219-2	C57BL6J-638850.43	2530	0.65723	C57BL6J-638850	C57BL6J-638850	wt/wt	M	5.16435	8.14321	7.8	Glut	14 HY Glut	132 AHN-RCH-LHA Otp Fezf1 Glut	0580 AHN-RCH-LHA Otp Fezf1 Glut_2	2349 AHN-RCH-LHA Otp Fezf1 Glut_2	#2B93DF	#AA0DFE	#2E9957	#99455A	#739EFF	132 AHN-RCH-LHA Otp Fezf1 Glut
1.01917e+18	SCN	19912.2	7473	1.01917e+18	C57BL6J-638850.43	2530	0.566048	C57BL6J-638850	C57BL6J-638850	wt/wt	M	5.9022	8.2849	7.8	Glut	14 HY Glut	132 AHN-RCH-LHA Otp Fezf1 Glut	0580 AHN-RCH-LHA Otp Fezf1 Glut_2	2349 AHN-RCH-LHA Otp Fezf1 Glut_2	#2B93DF	#AA0DFE	#2E9957	#99455A	#739EFF	132 AHN-RCH-LHA Otp Fezf1 Glut
1019171907101720385-2	SCN	14985.2	6845	1019171907101720385-2	C57BL6J-638850.43	1431	0.741504	C57BL6J-638850	C57BL6J-638850	wt/wt	M	5.67992	8.10346	7.8	GABA	12 HY GABA	094 SCH Six6 Cdc14a Gaba	0437 SCH Six6 Cdc14a Gaba_2	1614 SCH Six6 Cdc14a Gaba_2	#FF3358	#FF6600	#FFBC4D	#66110F	#592E66	094 SCH | Cck/C1ql3
1019171907101550608-2	SCN	14215.4	6983	1019171907101550608-2	C57BL6J-638850.43	1431	0.678368	C57BL6J-638850	C57BL6J-638850	wt/wt	M	5.37236	8.47457	7.8	GABA	12 HY GABA	094 SCH Six6 Cdc14a Gaba	0437 SCH Six6 Cdc14a Gaba_2	1614 SCH Six6 Cdc14a Gaba_2	#FF3358	#FF6600	#FFBC4D	#66110F	#592E66	094 SCH | Cck/C1ql3
1019171907101550773-1	SCN	14470.8	6947	1019171907101550773-1	C57BL6J-638850.43	1431	0.739978	C57BL6J-638850	C57BL6J-638850	wt/wt	M	5.3924	8.17507	7.8	GABA	12 HY GABA	094 SCH Six6 Cdc14a Gaba	0437 SCH Six6 Cdc14a Gaba_2	1614 SCH Six6 Cdc14a Gaba_2	#FF3358	#FF6600	#FFBC4D	#66110F	#592E66	094 SCH | Cck/C1ql3
1.01917e+18	SCN	14630.4	6720	1.01917e+18	C57BL6J-638850.43	1431	0.65565	C57BL6J-638850	C57BL6J-638850	wt/wt	M	5.75735	8.33677	7.8	GABA	12 HY GABA	094 SCH Six6 Cdc14a Gaba	0437 SCH Six6 Cdc14a Gaba_2	1614 SCH Six6 Cdc14a Gaba_2	#FF3358	#FF6600	#FFBC4D	#66110F	#592E66	094 SCH | Cck/C1ql3
1019171907101550575-1	SCN	14878.4	6766	1019171907101550575-1	C57BL6J-638850.43	1431	0.786654	C57BL6J-638850	C57BL6J-638850	wt/wt	M	5.3082	8.11658	7.8	GABA	12 HY GABA	094 SCH Six6 Cdc14a Gaba	0437 SCH Six6 Cdc14a Gaba_2	1614 SCH Six6 Cdc14a Gaba_2	#FF3358	#FF6600	#FFBC4D	#66110F	#592E66	094 SCH | Cck/C1ql3
1019171907101720383-2	SCN	14623.7	6921	1019171907101720383-2	C57BL6J-638850.43	1431	0.704016	C57BL6J-638850	C57BL6J-638850	wt/wt	M	5.69607	8.22253	7.8	GABA	12 HY GABA	094 SCH Six6 Cdc14a Gaba	0437 SCH Six6 Cdc14a Gaba_2	1614 SCH Six6 Cdc14a Gaba_2	#FF3358	#FF6600	#FFBC4D	#66110F	#592E66	094 SCH | Cck/C1ql3
1019171907101730257-2	SCN	18491.7	7127	1019171907101730257-2	C57BL6J-638850.43	1438	0.701579	C57BL6J-638850	C57BL6J-638850	wt/wt	M	5.63091	7.83245	7.8	GABA	12 HY GABA	097 PVHd-SBPV Six3 Prox1 Gaba	0445 PVHd-SBPV Six3 Prox1 Gaba_4	1643 PVHd-SBPV Six3 Prox1 Gaba_4	#FF3358	#FF6600	#2E3D66	#48663D	#623D66	097 PVHd-SBPV Six3 Prox1 Gaba
1.01917e+18	SCN	19441.3	6964	1.01917e+18	C57BL6J-638850.43	2509	0.658505	C57BL6J-638850	C57BL6J-638850	wt/wt	M	6.01426	8.2252	7.8	Glut	14 HY Glut	132 AHN-RCH-LHA Otp Fezf1 Glut	0580 AHN-RCH-LHA Otp Fezf1 Glut_2	2345 AHN-RCH-LHA Otp Fezf1 Glut_2	#2B93DF	#AA0DFE	#2E9957	#99455A	#660031	132 AHN-RCH-LHA Otp Fezf1 Glut
1.01917e+18	SCN	20298.9	7342	1.01917e+18	C57BL6J-638850.43	2509	0.648123	C57BL6J-638850	C57BL6J-638850	wt/wt	M	5.89759	8.2325	7.8	Glut	14 HY Glut	132 AHN-RCH-LHA Otp Fezf1 Glut	0580 AHN-RCH-LHA Otp Fezf1 Glut_2	2345 AHN-RCH-LHA Otp Fezf1 Glut_2	#2B93DF	#AA0DFE	#2E9957	#99455A	#660031	132 AHN-RCH-LHA Otp Fezf1 Glut
1.01917e+18	SCN	20611.6	7276	1.01917e+18	C57BL6J-638850.43	2509	0.731403	C57BL6J-638850	C57BL6J-638850	wt/wt	M	6.0583	8.26872	7.8	Glut	14 HY Glut	132 AHN-RCH-LHA Otp Fezf1 Glut	0580 AHN-RCH-LHA Otp Fezf1 Glut_2	2345 AHN-RCH-LHA Otp Fezf1 Glut_2	#2B93DF	#AA0DFE	#2E9957	#99455A	#660031	132 AHN-RCH-LHA Otp Fezf1 Glut
1.01917e+18	SCN	16360.8	6977	1.01917e+18	C57BL6J-638850.43	1447	0.666891	C57BL6J-638850	C57BL6J-638850	wt/wt	M	5.462	8.04785	7.8	GABA	12 HY GABA	097 PVHd-SBPV Six3 Prox1 Gaba	0445 PVHd-SBPV Six3 Prox1 Gaba_4	1646 PVHd-SBPV Six3 Prox1 Gaba_4	#FF3358	#FF6600	#2E3D66	#48663D	#76FF00	097 PVHd-SBPV Six3 Prox1 Gaba
1.01917e+18	SCN	18898.1	7460	1.01917e+18	C57BL6J-638850.43	2530	0.590273	C57BL6J-638850	C57BL6J-638850	wt/wt	M	5.90111	8.38266	7.8	Glut	14 HY Glut	132 AHN-RCH-LHA Otp Fezf1 Glut	0580 AHN-RCH-LHA Otp Fezf1 Glut_2	2349 AHN-RCH-LHA Otp Fezf1 Glut_2	#2B93DF	#AA0DFE	#2E9957	#99455A	#739EFF	132 AHN-RCH-LHA Otp Fezf1 Glut
1.01917e+18	SCN	18042.9	6739	1.01917e+18	C57BL6J-638850.43	1476	0.749266	C57BL6J-638850	C57BL6J-638850	wt/wt	M	5.94925	8.39719	7.8	GABA	12 HY GABA	099 SBPV-PVa Six6 Satb2 Gaba	0455 SBPV-PVa Six6 Satb2 Gaba_3	1697 SBPV-PVa Six6 Satb2 Gaba_3	#FF3358	#FF6600	#99FF4D	#5C6F99	#362E99	099 SBPV-PVa Six6 Satb2 Gaba
1019171907101890031-2	SCN	19531.5	7239	1019171907101890031-2	C57BL6J-638850.43	2530	0.564929	C57BL6J-638850	C57BL6J-638850	wt/wt	M	6.03824	8.11198	7.8	Glut	14 HY Glut	132 AHN-RCH-LHA Otp Fezf1 Glut	0580 AHN-RCH-LHA Otp Fezf1 Glut_2	2349 AHN-RCH-LHA Otp Fezf1 Glut_2	#2B93DF	#AA0DFE	#2E9957	#99455A	#739EFF	132 AHN-RCH-LHA Otp Fezf1 Glut
1.01917e+18	SCN	19070.3	7515	1.01917e+18	C57BL6J-638850.43	2530	0.585588	C57BL6J-638850	C57BL6J-638850	wt/wt	M	6.04361	8.15695	7.8	Glut	14 HY Glut	132 AHN-RCH-LHA Otp Fezf1 Glut	0580 AHN-RCH-LHA Otp Fezf1 Glut_2	2349 AHN-RCH-LHA Otp Fezf1 Glut_2	#2B93DF	#AA0DFE	#2E9957	#99455A	#739EFF	132 AHN-RCH-LHA Otp Fezf1 Glut
1019171907101730236-2	SCN	18033.6	6803	1019171907101730236-2	C57BL6J-638850.43	1438	0.71268	C57BL6J-638850	C57BL6J-638850	wt/wt	M	5.62042	7.84475	7.8	GABA	12 HY GABA	097 PVHd-SBPV Six3 Prox1 Gaba	0445 PVHd-SBPV Six3 Prox1 Gaba_4	1643 PVHd-SBPV Six3 Prox1 Gaba_4	#FF3358	#FF6600	#2E3D66	#48663D	#623D66	097 PVHd-SBPV Six3 Prox1 Gaba
1019171907101720070-1	SCN	13343.8	6685	1019171907101720070-1	C57BL6J-638850.43	1431	0.644133	C57BL6J-638850	C57BL6J-638850	wt/wt	M	5.58008	8.31144	7.8	GABA	12 HY GABA	094 SCH Six6 Cdc14a Gaba	0437 SCH Six6 Cdc14a Gaba_2	1614 SCH Six6 Cdc14a Gaba_2	#FF3358	#FF6600	#FFBC4D	#66110F	#592E66	094 SCH | Cck/C1ql3
1019171907101720124-2	SCN	13697	6903	1019171907101720124-2	C57BL6J-638850.43	1431	0.614415	C57BL6J-638850	C57BL6J-638850	wt/wt	M	5.63346	8.44736	7.8	GABA	12 HY GABA	094 SCH Six6 Cdc14a Gaba	0437 SCH Six6 Cdc14a Gaba_2	1614 SCH Six6 Cdc14a Gaba_2	#FF3358	#FF6600	#FFBC4D	#66110F	#592E66	094 SCH | Cck/C1ql3
1019171907101550769-1	SCN	14227.5	6996	1019171907101550769-1	C57BL6J-638850.43	1431	0.531646	C57BL6J-638850	C57BL6J-638850	wt/wt	M	5.40072	8.25776	7.8	GABA	12 HY GABA	094 SCH Six6 Cdc14a Gaba	0437 SCH Six6 Cdc14a Gaba_2	1614 SCH Six6 Cdc14a Gaba_2	#FF3358	#FF6600	#FFBC4D	#66110F	#592E66	094 SCH | Cck/C1ql3
1.01917e+18	SCN	14478.6	6896	1.01917e+18	C57BL6J-638850.43	1431	0.708271	C57BL6J-638850	C57BL6J-638850	wt/wt	M	5.69291	8.24027	7.8	GABA	12 HY GABA	094 SCH Six6 Cdc14a Gaba	0437 SCH Six6 Cdc14a Gaba_2	1614 SCH Six6 Cdc14a Gaba_2	#FF3358	#FF6600	#FFBC4D	#66110F	#592E66	094 SCH | Cck/C1ql3
1.01917e+18	SCN	18529.5	7563	1.01917e+18	C57BL6J-638850.43	1454	0.655455	C57BL6J-638850	C57BL6J-638850	wt/wt	M	5.91589	7.96354	7.8	GABA	11 CNU-HYa GABA	090 BST-MPN Six3 Nrgn Gaba	0422 BST-MPN Six3 Nrgn Gaba_3	1541 BST-MPN Six3 Nrgn Gaba_3	#FF3358	#450099	#996600	#009299	#A000CC	090 BST-MPN Six3 Nrgn Gaba
1.01917e+18	SCN	18370.5	7218	1.01917e+18	C57BL6J-638850.43	1438	0.650953	C57BL6J-638850	C57BL6J-638850	wt/wt	M	5.68443	7.90247	7.8	GABA	12 HY GABA	097 PVHd-SBPV Six3 Prox1 Gaba	0445 PVHd-SBPV Six3 Prox1 Gaba_4	1643 PVHd-SBPV Six3 Prox1 Gaba_4	#FF3358	#FF6600	#2E3D66	#48663D	#623D66	097 PVHd-SBPV Six3 Prox1 Gaba
1.01917e+18	SCN	15982.7	6908	1.01917e+18	C57BL6J-638850.43	1479	0.731344	C57BL6J-638850	C57BL6J-638850	wt/wt	M	5.5177	8.12435	7.8	GABA	12 HY GABA	099 SBPV-PVa Six6 Satb2 Gaba	0454 SBPV-PVa Six6 Satb2 Gaba_2	1692 SBPV-PVa Six6 Satb2 Gaba_2	#FF3358	#FF6600	#99FF4D	#A7FF73	#0F2266	099 SBPV-PVa Six6 Satb2 Gaba
1019171907101730279-1	SCN	18274.3	7048	1019171907101730279-1	C57BL6J-638850.43	1438	0.705093	C57BL6J-638850	C57BL6J-638850	wt/wt	M	5.66402	7.97725	7.8	GABA	12 HY GABA	097 PVHd-SBPV Six3 Prox1 Gaba	0445 PVHd-SBPV Six3 Prox1 Gaba_4	1643 PVHd-SBPV Six3 Prox1 Gaba_4	#FF3358	#FF6600	#2E3D66	#48663D	#623D66	097 PVHd-SBPV Six3 Prox1 Gaba
1.01917e+18	SCN	16856.6	7069	1.01917e+18	C57BL6J-638850.43	1451	0.653442	C57BL6J-638850	C57BL6J-638850	wt/wt	M	5.53702	7.90233	7.8	GABA	11 CNU-HYa GABA	089 PVR Six3 Sox3 Gaba	0411 PVR Six3 Sox3 Gaba_1	1504 PVR Six3 Sox3 Gaba_1	#FF3358	#450099	#4DFFB4	#5C996B	#FFB626	089 PVR Six3 Sox3 Gaba
1019171907101550257-2	SCN	16696.4	7076	1019171907101550257-2	C57BL6J-638850.43	1451	0.589037	C57BL6J-638850	C57BL6J-638850	wt/wt	M	5.19752	8.16164	7.8	GABA	11 CNU-HYa GABA	089 PVR Six3 Sox3 Gaba	0411 PVR Six3 Sox3 Gaba_1	1504 PVR Six3 Sox3 Gaba_1	#FF3358	#450099	#4DFFB4	#5C996B	#FFB626	089 PVR Six3 Sox3 Gaba
1019171907101720433-2	SCN	14621.9	6865	1019171907101720433-2	C57BL6J-638850.43	1431	0.706797	C57BL6J-638850	C57BL6J-638850	wt/wt	M	5.70983	8.20152	7.8	GABA	12 HY GABA	094 SCH Six6 Cdc14a Gaba	0437 SCH Six6 Cdc14a Gaba_2	1614 SCH Six6 Cdc14a Gaba_2	#FF3358	#FF6600	#FFBC4D	#66110F	#592E66	094 SCH | Cck/C1ql3
1019171907101550580-1	SCN	14789.3	6898	1019171907101550580-1	C57BL6J-638850.43	1431	0.622096	C57BL6J-638850	C57BL6J-638850	wt/wt	M	5.31542	8.15733	7.8	GABA	12 HY GABA	094 SCH Six6 Cdc14a Gaba	0437 SCH Six6 Cdc14a Gaba_2	1614 SCH Six6 Cdc14a Gaba_2	#FF3358	#FF6600	#FFBC4D	#66110F	#592E66	094 SCH | Cck/C1ql3
1019171907101550546-2	SCN	14545.1	6847	1019171907101550546-2	C57BL6J-638850.43	1431	0.741335	C57BL6J-638850	C57BL6J-638850	wt/wt	M	5.30785	8.18412	7.8	GABA	12 HY GABA	094 SCH Six6 Cdc14a Gaba	0437 SCH Six6 Cdc14a Gaba_2	1614 SCH Six6 Cdc14a Gaba_2	#FF3358	#FF6600	#FFBC4D	#66110F	#592E66	094 SCH | Cck/C1ql3
1019171907101550234-2	SCN	14767.8	6979	1019171907101550234-2	C57BL6J-638850.43	1431	0.718191	C57BL6J-638850	C57BL6J-638850	wt/wt	M	5.20615	8.29367	7.8	GABA	12 HY GABA	094 SCH Six6 Cdc14a Gaba	0437 SCH Six6 Cdc14a Gaba_2	1614 SCH Six6 Cdc14a Gaba_2	#FF3358	#FF6600	#FFBC4D	#66110F	#592E66	094 SCH | Cck/C1ql3
1.01917e+18	SCN	18556.1	7308	1.01917e+18	C57BL6J-638850.43	2495	0.544649	C57BL6J-638850	C57BL6J-638850	wt/wt	M	6.07095	8.44565	7.8	Glut	14 HY Glut	132 AHN-RCH-LHA Otp Fezf1 Glut	0581 AHN-RCH-LHA Otp Fezf1 Glut_3	2355 AHN-RCH-LHA Otp Fezf1 Glut_3	#2B93DF	#AA0DFE	#2E9957	#99955C	#DEFF73	132 AHN-RCH-LHA Otp Fezf1 Glut
1019171907101550226-1	SCN	19012.2	6692	1019171907101550226-1	C57BL6J-638850.43	1446	0.730697	C57BL6J-638850	C57BL6J-638850	wt/wt	M	5.18142	8.1972	7.8	GABA	11 CNU-HYa GABA	089 PVR Six3 Sox3 Gaba	0413 PVR Six3 Sox3 Gaba_3	1512 PVR Six3 Sox3 Gaba_3	#FF3358	#450099	#4DFFB4	#AB99FF	#993600	089 PVR Six3 Sox3 Gaba
1.01917e+18	SCN	16732.2	6725	1.01917e+18	C57BL6J-638850.43	1479	0.735069	C57BL6J-638850	C57BL6J-638850	wt/wt	M	5.52151	8.10662	7.8	GABA	12 HY GABA	099 SBPV-PVa Six6 Satb2 Gaba	0454 SBPV-PVa Six6 Satb2 Gaba_2	1692 SBPV-PVa Six6 Satb2 Gaba_2	#FF3358	#FF6600	#99FF4D	#A7FF73	#0F2266	099 SBPV-PVa Six6 Satb2 Gaba
1019171907101730140-2	SCN	16592.2	6784	1019171907101730140-2	C57BL6J-638850.43	1479	0.762744	C57BL6J-638850	C57BL6J-638850	wt/wt	M	5.55259	7.87683	7.8	GABA	12 HY GABA	099 SBPV-PVa Six6 Satb2 Gaba	0454 SBPV-PVa Six6 Satb2 Gaba_2	1692 SBPV-PVa Six6 Satb2 Gaba_2	#FF3358	#FF6600	#99FF4D	#A7FF73	#0F2266	099 SBPV-PVa Six6 Satb2 Gaba
1.01917e+18	SCN	14891.6	6764	1.01917e+18	C57BL6J-638850.43	1431	0.757937	C57BL6J-638850	C57BL6J-638850	wt/wt	M	5.36893	8.11936	7.8	GABA	12 HY GABA	094 SCH Six6 Cdc14a Gaba	0437 SCH Six6 Cdc14a Gaba_2	1614 SCH Six6 Cdc14a Gaba_2	#FF3358	#FF6600	#FFBC4D	#66110F	#592E66	094 SCH | Cck/C1ql3
1019171907101550246-2	SCN	14431.2	6788	1019171907101550246-2	C57BL6J-638850.43	1431	0.696326	C57BL6J-638850	C57BL6J-638850	wt/wt	M	5.21948	8.35049	7.8	GABA	12 HY GABA	094 SCH Six6 Cdc14a Gaba	0437 SCH Six6 Cdc14a Gaba_2	1614 SCH Six6 Cdc14a Gaba_2	#FF3358	#FF6600	#FFBC4D	#66110F	#592E66	094 SCH | Cck/C1ql3
1.01917e+18	SCN	14960.7	6761	1.01917e+18	C57BL6J-638850.43	1431	0.681546	C57BL6J-638850	C57BL6J-638850	wt/wt	M	5.40712	8.14055	7.8	GABA	12 HY GABA	094 SCH Six6 Cdc14a Gaba	0437 SCH Six6 Cdc14a Gaba_2	1614 SCH Six6 Cdc14a Gaba_2	#FF3358	#FF6600	#FFBC4D	#66110F	#592E66	094 SCH | Cck/C1ql3
1.01917e+18	SCN	16304.2	6920	1.01917e+18	C57BL6J-638850.43	1447	0.613979	C57BL6J-638850	C57BL6J-638850	wt/wt	M	5.55096	7.90396	7.8	GABA	12 HY GABA	097 PVHd-SBPV Six3 Prox1 Gaba	0445 PVHd-SBPV Six3 Prox1 Gaba_4	1646 PVHd-SBPV Six3 Prox1 Gaba_4	#FF3358	#FF6600	#2E3D66	#48663D	#76FF00	097 PVHd-SBPV Six3 Prox1 Gaba
1.01917e+18	SCN	18253.5	6527	1.01917e+18	C57BL6J-638850.43	1476	0.712679	C57BL6J-638850	C57BL6J-638850	wt/wt	M	5.47522	8.05534	7.8	GABA	12 HY GABA	099 SBPV-PVa Six6 Satb2 Gaba	0455 SBPV-PVa Six6 Satb2 Gaba_3	1697 SBPV-PVa Six6 Satb2 Gaba_3	#FF3358	#FF6600	#99FF4D	#5C6F99	#362E99	099 SBPV-PVa Six6 Satb2 Gaba
1019171907101560671-1	SCN	17509.8	7382	1019171907101560671-1	C57BL6J-638850.43	1476	0.583304	C57BL6J-638850	C57BL6J-638850	wt/wt	M	5.46758	7.88351	7.8	GABA	12 HY GABA	099 SBPV-PVa Six6 Satb2 Gaba	0455 SBPV-PVa Six6 Satb2 Gaba_3	1697 SBPV-PVa Six6 Satb2 Gaba_3	#FF3358	#FF6600	#99FF4D	#5C6F99	#362E99	099 SBPV-PVa Six6 Satb2 Gaba
1019171907101720118-1	SCN	14167.3	7077	1019171907101720118-1	C57BL6J-638850.43	1431	0.536789	C57BL6J-638850	C57BL6J-638850	wt/wt	M	5.5993	8.25326	7.8	GABA	12 HY GABA	094 SCH Six6 Cdc14a Gaba	0437 SCH Six6 Cdc14a Gaba_2	1614 SCH Six6 Cdc14a Gaba_2	#FF3358	#FF6600	#FFBC4D	#66110F	#592E66	094 SCH | Cck/C1ql3
1.01917e+18	SCN	17542.2	7355	1.01917e+18	C57BL6J-638850.43	1450	0.636166	C57BL6J-638850	C57BL6J-638850	wt/wt	M	5.82145	8.45623	7.8	GABA	11 CNU-HYa GABA	089 PVR Six3 Sox3 Gaba	0411 PVR Six3 Sox3 Gaba_1	1503 PVR Six3 Sox3 Gaba_1	#FF3358	#450099	#4DFFB4	#5C996B	#FF99E8	089 PVR Six3 Sox3 Gaba
1.01917e+18	SCN	18078.7	7072	1.01917e+18	C57BL6J-638850.43	1456	0.715049	C57BL6J-638850	C57BL6J-638850	wt/wt	M	5.63249	7.8503	7.8	GABA	11 CNU-HYa GABA	089 PVR Six3 Sox3 Gaba	0413 PVR Six3 Sox3 Gaba_3	1513 PVR Six3 Sox3 Gaba_3	#FF3358	#450099	#4DFFB4	#AB99FF	#CC6E5C	089 PVR Six3 Sox3 Gaba
1.01917e+18	SCN	17509	6881	1.01917e+18	C57BL6J-638850.43	1457	0.65602	C57BL6J-638850	C57BL6J-638850	wt/wt	M	5.85145	7.98265	7.8	GABA	11 CNU-HYa GABA	089 PVR Six3 Sox3 Gaba	0412 PVR Six3 Sox3 Gaba_2	1508 PVR Six3 Sox3 Gaba_2	#FF3358	#450099	#4DFFB4	#6C00FF	#26CC00	089 PVR Six3 Sox3 Gaba
1019171907101730090-2	SCN	16586.3	6859	1019171907101730090-2	C57BL6J-638850.43	1479	0.702646	C57BL6J-638850	C57BL6J-638850	wt/wt	M	5.53568	7.91401	7.8	GABA	12 HY GABA	099 SBPV-PVa Six6 Satb2 Gaba	0454 SBPV-PVa Six6 Satb2 Gaba_2	1692 SBPV-PVa Six6 Satb2 Gaba_2	#FF3358	#FF6600	#99FF4D	#A7FF73	#0F2266	099 SBPV-PVa Six6 Satb2 Gaba
1.01917e+18	SCN	17742	7184	1.01917e+18	C57BL6J-638850.43	1450	0.665277	C57BL6J-638850	C57BL6J-638850	wt/wt	M	5.87473	8.16983	7.8	GABA	11 CNU-HYa GABA	089 PVR Six3 Sox3 Gaba	0411 PVR Six3 Sox3 Gaba_1	1503 PVR Six3 Sox3 Gaba_1	#FF3358	#450099	#4DFFB4	#5C996B	#FF99E8	089 PVR Six3 Sox3 Gaba
1.01917e+18	SCN	20635.7	7238	1.01917e+18	C57BL6J-638850.43	2509	0.676896	C57BL6J-638850	C57BL6J-638850	wt/wt	M	6.05061	8.21864	7.8	Glut	14 HY Glut	132 AHN-RCH-LHA Otp Fezf1 Glut	0580 AHN-RCH-LHA Otp Fezf1 Glut_2	2345 AHN-RCH-LHA Otp Fezf1 Glut_2	#2B93DF	#AA0DFE	#2E9957	#99455A	#660031	132 AHN-RCH-LHA Otp Fezf1 Glut
1019171907101550732-1	SCN	14563.5	7044	1019171907101550732-1	C57BL6J-638850.43	1431	0.711918	C57BL6J-638850	C57BL6J-638850	wt/wt	M	5.37057	8.14745	7.8	GABA	12 HY GABA	094 SCH Six6 Cdc14a Gaba	0437 SCH Six6 Cdc14a Gaba_2	1614 SCH Six6 Cdc14a Gaba_2	#FF3358	#FF6600	#FFBC4D	#66110F	#592E66	094 SCH | Cck/C1ql3
1.01917e+18	SCN	14857.3	7004	1.01917e+18	C57BL6J-638850.43	1431	0.652968	C57BL6J-638850	C57BL6J-638850	wt/wt	M	5.34726	8.06032	7.8	GABA	12 HY GABA	094 SCH Six6 Cdc14a Gaba	0437 SCH Six6 Cdc14a Gaba_2	1614 SCH Six6 Cdc14a Gaba_2	#FF3358	#FF6600	#FFBC4D	#66110F	#592E66	094 SCH | Cck/C1ql3
1.01917e+18	SCN	19585.1	7437	1.01917e+18	C57BL6J-638850.43	2509	0.679951	C57BL6J-638850	C57BL6J-638850	wt/wt	M	5.86325	8.20913	7.8	Glut	14 HY Glut	132 AHN-RCH-LHA Otp Fezf1 Glut	0580 AHN-RCH-LHA Otp Fezf1 Glut_2	2345 AHN-RCH-LHA Otp Fezf1 Glut_2	#2B93DF	#AA0DFE	#2E9957	#99455A	#660031	132 AHN-RCH-LHA Otp Fezf1 Glut
1019171907101730295-2	SCN	17512.2	7111	1019171907101730295-2	C57BL6J-638850.43	1447	0.655545	C57BL6J-638850	C57BL6J-638850	wt/wt	M	5.65254	7.842	7.8	GABA	12 HY GABA	097 PVHd-SBPV Six3 Prox1 Gaba	0445 PVHd-SBPV Six3 Prox1 Gaba_4	1646 PVHd-SBPV Six3 Prox1 Gaba_4	#FF3358	#FF6600	#2E3D66	#48663D	#76FF00	097 PVHd-SBPV Six3 Prox1 Gaba
1019171907101730233-2	SCN	16712.8	6986	1019171907101730233-2	C57BL6J-638850.43	1447	0.52858	C57BL6J-638850	C57BL6J-638850	wt/wt	M	5.62764	7.90229	7.8	GABA	12 HY GABA	097 PVHd-SBPV Six3 Prox1 Gaba	0445 PVHd-SBPV Six3 Prox1 Gaba_4	1646 PVHd-SBPV Six3 Prox1 Gaba_4	#FF3358	#FF6600	#2E3D66	#48663D	#76FF00	097 PVHd-SBPV Six3 Prox1 Gaba
1019171907101720549-1	SCN	18238.6	7215	1019171907101720549-1	C57BL6J-638850.43	1456	0.746799	C57BL6J-638850	C57BL6J-638850	wt/wt	M	5.75457	8.05036	7.8	GABA	11 CNU-HYa GABA	089 PVR Six3 Sox3 Gaba	0413 PVR Six3 Sox3 Gaba_3	1513 PVR Six3 Sox3 Gaba_3	#FF3358	#450099	#4DFFB4	#AB99FF	#CC6E5C	089 PVR Six3 Sox3 Gaba
1.01917e+18	SCN	17815.8	7076	1.01917e+18	C57BL6J-638850.43	1442	0.628689	C57BL6J-638850	C57BL6J-638850	wt/wt	M	5.8678	8.24156	7.8	GABA	11 CNU-HYa GABA	090 BST-MPN Six3 Nrgn Gaba	0426 BST-MPN Six3 Nrgn Gaba_7	1568 BST-MPN Six3 Nrgn Gaba_7	#FF3358	#450099	#996600	#0091FF	#26FFC5	090 BST-MPN Six3 Nrgn Gaba
1.01917e+18	SCN	17833.2	6911	1.01917e+18	C57BL6J-638850.43	1442	0.652475	C57BL6J-638850	C57BL6J-638850	wt/wt	M	5.87874	8.03496	7.8	GABA	11 CNU-HYa GABA	090 BST-MPN Six3 Nrgn Gaba	0426 BST-MPN Six3 Nrgn Gaba_7	1568 BST-MPN Six3 Nrgn Gaba_7	#FF3358	#450099	#996600	#0091FF	#26FFC5	090 BST-MPN Six3 Nrgn Gaba
1019171907101550811-1	SCN	15532.2	6898	1019171907101550811-1	C57BL6J-638850.43	1431	0.670773	C57BL6J-638850	C57BL6J-638850	wt/wt	M	5.39241	8.05968	7.8	GABA	12 HY GABA	094 SCH Six6 Cdc14a Gaba	0437 SCH Six6 Cdc14a Gaba_2	1614 SCH Six6 Cdc14a Gaba_2	#FF3358	#FF6600	#FFBC4D	#66110F	#592E66	094 SCH | Cck/C1ql3
1019171907101550163-2	SCN	13568.5	6867	1019171907101550163-2	C57BL6J-638850.43	1431	0.638445	C57BL6J-638850	C57BL6J-638850	wt/wt	M	5.18115	8.46472	7.8	GABA	12 HY GABA	094 SCH Six6 Cdc14a Gaba	0437 SCH Six6 Cdc14a Gaba_2	1614 SCH Six6 Cdc14a Gaba_2	#FF3358	#FF6600	#FFBC4D	#66110F	#592E66	094 SCH | Cck/C1ql3
1.01917e+18	SCN	18010	6693	1.01917e+18	C57BL6J-638850.43	2498	0.660635	C57BL6J-638850	C57BL6J-638850	wt/wt	M	5.46106	8.32526	7.8	Glut-GABA	14 HY Glut	131 LHA-AHN-PVH Otp Trh Glut	0578 LHA-AHN-PVH Otp Trh Glut_5	2339 LHA-AHN-PVH Otp Trh Glut_5	#0a9964	#AA0DFE	#7ABACC	#2E3D99	#662E65	131 LHA-AHN-PVH Otp Trh Glut
1.01917e+18	SCN	17412.1	6680	1.01917e+18	C57BL6J-638850.43	1477	0.721308	C57BL6J-638850	C57BL6J-638850	wt/wt	M	5.52204	8.05396	7.8	GABA	12 HY GABA	099 SBPV-PVa Six6 Satb2 Gaba	0454 SBPV-PVa Six6 Satb2 Gaba_2	1691 SBPV-PVa Six6 Satb2 Gaba_2	#FF3358	#FF6600	#99FF4D	#A7FF73	#5C9987	099 SBPV-PVa Six6 Satb2 Gaba
1.01917e+18	SCN	17863.3	7187	1.01917e+18	C57BL6J-638850.43	1442	0.756315	C57BL6J-638850	C57BL6J-638850	wt/wt	M	5.86237	8.17263	7.8	GABA	11 CNU-HYa GABA	090 BST-MPN Six3 Nrgn Gaba	0426 BST-MPN Six3 Nrgn Gaba_7	1568 BST-MPN Six3 Nrgn Gaba_7	#FF3358	#450099	#996600	#0091FF	#26FFC5	090 BST-MPN Six3 Nrgn Gaba
1.01917e+18	SCN	17686.7	6976	1.01917e+18	C57BL6J-638850.43	1442	0.688094	C57BL6J-638850	C57BL6J-638850	wt/wt	M	5.84394	8.23096	7.8	GABA	11 CNU-HYa GABA	090 BST-MPN Six3 Nrgn Gaba	0426 BST-MPN Six3 Nrgn Gaba_7	1568 BST-MPN Six3 Nrgn Gaba_7	#FF3358	#450099	#996600	#0091FF	#26FFC5	090 BST-MPN Six3 Nrgn Gaba
1.01917e+18	SCN	17869.4	7033	1.01917e+18	C57BL6J-638850.43	1456	0.784493	C57BL6J-638850	C57BL6J-638850	wt/wt	M	5.75276	7.88379	7.8	GABA	11 CNU-HYa GABA	089 PVR Six3 Sox3 Gaba	0413 PVR Six3 Sox3 Gaba_3	1513 PVR Six3 Sox3 Gaba_3	#FF3358	#450099	#4DFFB4	#AB99FF	#CC6E5C	089 PVR Six3 Sox3 Gaba
1019171907101550320-2	SCN	18173	6923	1019171907101550320-2	C57BL6J-638850.43	1456	0.706194	C57BL6J-638850	C57BL6J-638850	wt/wt	M	5.20803	8.07306	7.8	GABA	11 CNU-HYa GABA	089 PVR Six3 Sox3 Gaba	0413 PVR Six3 Sox3 Gaba_3	1513 PVR Six3 Sox3 Gaba_3	#FF3358	#450099	#4DFFB4	#AB99FF	#CC6E5C	089 PVR Six3 Sox3 Gaba
1019171907101710219-1	SCN	17984.6	7009	1019171907101710219-1	C57BL6J-638850.43	1456	0.573642	C57BL6J-638850	C57BL6J-638850	wt/wt	M	5.89144	8.44767	7.8	GABA	11 CNU-HYa GABA	089 PVR Six3 Sox3 Gaba	0413 PVR Six3 Sox3 Gaba_3	1513 PVR Six3 Sox3 Gaba_3	#FF3358	#450099	#4DFFB4	#AB99FF	#CC6E5C	089 PVR Six3 Sox3 Gaba
1019171907101730452-2	SCN	18054.3	7005	1019171907101730452-2	C57BL6J-638850.43	1456	0.772754	C57BL6J-638850	C57BL6J-638850	wt/wt	M	5.77036	7.95541	7.8	GABA	11 CNU-HYa GABA	089 PVR Six3 Sox3 Gaba	0413 PVR Six3 Sox3 Gaba_3	1513 PVR Six3 Sox3 Gaba_3	#FF3358	#450099	#4DFFB4	#AB99FF	#CC6E5C	089 PVR Six3 Sox3 Gaba
1019171907101550112-3	SCN	18223.9	7001	1019171907101550112-3	C57BL6J-638850.43	1456	0.733012	C57BL6J-638850	C57BL6J-638850	wt/wt	M	5.12508	8.2703	7.8	GABA	11 CNU-HYa GABA	089 PVR Six3 Sox3 Gaba	0413 PVR Six3 Sox3 Gaba_3	1513 PVR Six3 Sox3 Gaba_3	#FF3358	#450099	#4DFFB4	#AB99FF	#CC6E5C	089 PVR Six3 Sox3 Gaba
1019171907101730247-2	SCN	17612.2	7198	1019171907101730247-2	C57BL6J-638850.43	1447	0.634936	C57BL6J-638850	C57BL6J-638850	wt/wt	M	5.62971	7.86233	7.8	GABA	12 HY GABA	097 PVHd-SBPV Six3 Prox1 Gaba	0445 PVHd-SBPV Six3 Prox1 Gaba_4	1646 PVHd-SBPV Six3 Prox1 Gaba_4	#FF3358	#FF6600	#2E3D66	#48663D	#76FF00	097 PVHd-SBPV Six3 Prox1 Gaba
1019171907101730489-1	SCN	17603.8	6885	1019171907101730489-1	C57BL6J-638850.43	1457	0.675723	C57BL6J-638850	C57BL6J-638850	wt/wt	M	5.79734	7.95253	7.8	GABA	11 CNU-HYa GABA	089 PVR Six3 Sox3 Gaba	0412 PVR Six3 Sox3 Gaba_2	1508 PVR Six3 Sox3 Gaba_2	#FF3358	#450099	#4DFFB4	#6C00FF	#26CC00	089 PVR Six3 Sox3 Gaba
1019171907101720212-1	SCN	18010.1	7051	1019171907101720212-1	C57BL6J-638850.43	1477	0.683919	C57BL6J-638850	C57BL6J-638850	wt/wt	M	5.62133	8.14675	7.8	GABA	12 HY GABA	099 SBPV-PVa Six6 Satb2 Gaba	0454 SBPV-PVa Six6 Satb2 Gaba_2	1691 SBPV-PVa Six6 Satb2 Gaba_2	#FF3358	#FF6600	#99FF4D	#A7FF73	#5C9987	099 SBPV-PVa Six6 Satb2 Gaba
1019171907101720092-1	SCN	17989.2	6993	1019171907101720092-1	C57BL6J-638850.43	1477	0.691581	C57BL6J-638850	C57BL6J-638850	wt/wt	M	5.57543	8.18502	7.8	GABA	12 HY GABA	099 SBPV-PVa Six6 Satb2 Gaba	0454 SBPV-PVa Six6 Satb2 Gaba_2	1691 SBPV-PVa Six6 Satb2 Gaba_2	#FF3358	#FF6600	#99FF4D	#A7FF73	#5C9987	099 SBPV-PVa Six6 Satb2 Gaba
1019171907101560623-1	SCN	17660.8	6974	1019171907101560623-1	C57BL6J-638850.43	1477	0.728402	C57BL6J-638850	C57BL6J-638850	wt/wt	M	5.43636	7.88019	7.8	GABA	12 HY GABA	099 SBPV-PVa Six6 Satb2 Gaba	0454 SBPV-PVa Six6 Satb2 Gaba_2	1691 SBPV-PVa Six6 Satb2 Gaba_2	#FF3358	#FF6600	#99FF4D	#A7FF73	#5C9987	099 SBPV-PVa Six6 Satb2 Gaba
1.01917e+18	SCN	18224.8	6973	1.01917e+18	C57BL6J-638850.43	1477	0.581357	C57BL6J-638850	C57BL6J-638850	wt/wt	M	5.60942	7.98829	7.8	GABA	12 HY GABA	099 SBPV-PVa Six6 Satb2 Gaba	0454 SBPV-PVa Six6 Satb2 Gaba_2	1691 SBPV-PVa Six6 Satb2 Gaba_2	#FF3358	#FF6600	#99FF4D	#A7FF73	#5C9987	099 SBPV-PVa Six6 Satb2 Gaba
1019171907101730142-2	SCN	17033.6	6937	1019171907101730142-2	C57BL6J-638850.43	1478	0.715153	C57BL6J-638850	C57BL6J-638850	wt/wt	M	5.55647	7.89545	7.8	GABA	12 HY GABA	099 SBPV-PVa Six6 Satb2 Gaba	0455 SBPV-PVa Six6 Satb2 Gaba_3	1694 SBPV-PVa Six6 Satb2 Gaba_3	#FF3358	#FF6600	#99FF4D	#5C6F99	#8B992E	099 SBPV-PVa Six6 Satb2 Gaba
1.01917e+18	SCN	16543.3	6813	1.01917e+18	C57BL6J-638850.43	1479	0.678544	C57BL6J-638850	C57BL6J-638850	wt/wt	M	5.51604	8.01318	7.8	GABA	12 HY GABA	099 SBPV-PVa Six6 Satb2 Gaba	0454 SBPV-PVa Six6 Satb2 Gaba_2	1692 SBPV-PVa Six6 Satb2 Gaba_2	#FF3358	#FF6600	#99FF4D	#A7FF73	#0F2266	099 SBPV-PVa Six6 Satb2 Gaba
1.01917e+18	SCN	16415.7	7141	1.01917e+18	C57BL6J-638850.43	1428	0.746093	C57BL6J-638850	C57BL6J-638850	wt/wt	M	5.61322	7.87835	7.8	GABA	12 HY GABA	094 SCH Six6 Cdc14a Gaba	0436 SCH Six6 Cdc14a Gaba_1	1606 SCH Six6 Cdc14a Gaba_1	#FF3358	#FF6600	#FFBC4D	#00FF8D	#5F0066	094 SCH | Avp shell
1.01917e+18	SCN	18298.3	7037	1.01917e+18	C57BL6J-638850.43	1439	0.713294	C57BL6J-638850	C57BL6J-638850	wt/wt	M	5.90669	7.93175	7.8	GABA	12 HY GABA	097 PVHd-SBPV Six3 Prox1 Gaba	0443 PVHd-SBPV Six3 Prox1 Gaba_2	1634 PVHd-SBPV Six3 Prox1 Gaba_2	#FF3358	#FF6600	#2E3D66	#35661F	#4DCC3D	097 PVHd-SBPV Six3 Prox1 Gaba
1019171907101710324-2	SCN	18525.1	7429	1019171907101710324-2	C57BL6J-638850.43	2498	0.630577	C57BL6J-638850	C57BL6J-638850	wt/wt	M	6.08956	8.43252	7.8	Glut-GABA	14 HY Glut	131 LHA-AHN-PVH Otp Trh Glut	0578 LHA-AHN-PVH Otp Trh Glut_5	2339 LHA-AHN-PVH Otp Trh Glut_5	#0a9964	#AA0DFE	#7ABACC	#2E3D99	#662E65	131 LHA-AHN-PVH Otp Trh Glut
1019171907101730159-2	SCN	19349.8	7294	1019171907101730159-2	C57BL6J-638850.43	2499	0.694926	C57BL6J-638850	C57BL6J-638850	wt/wt	M	5.58103	7.95493	7.8	Glut	14 HY Glut	131 LHA-AHN-PVH Otp Trh Glut	0574 LHA-AHN-PVH Otp Trh Glut_1	2328 LHA-AHN-PVH Otp Trh Glut_1	#2B93DF	#AA0DFE	#7ABACC	#1F6630	#D4FF99	131 LHA-AHN-PVH Otp Trh Glut
1.01917e+18	SCN	16753	6832	1.01917e+18	C57BL6J-638850.43	1478	0.655699	C57BL6J-638850	C57BL6J-638850	wt/wt	M	5.51556	7.96122	7.8	GABA	12 HY GABA	099 SBPV-PVa Six6 Satb2 Gaba	0455 SBPV-PVa Six6 Satb2 Gaba_3	1694 SBPV-PVa Six6 Satb2 Gaba_3	#FF3358	#FF6600	#99FF4D	#5C6F99	#8B992E	099 SBPV-PVa Six6 Satb2 Gaba
1019171907101730087-2	SCN	16981	6872	1019171907101730087-2	C57BL6J-638850.43	1478	0.645171	C57BL6J-638850	C57BL6J-638850	wt/wt	M	5.53996	7.95621	7.8	GABA	12 HY GABA	099 SBPV-PVa Six6 Satb2 Gaba	0455 SBPV-PVa Six6 Satb2 Gaba_3	1694 SBPV-PVa Six6 Satb2 Gaba_3	#FF3358	#FF6600	#99FF4D	#5C6F99	#8B992E	099 SBPV-PVa Six6 Satb2 Gaba
1019171907101560643-1	SCN	16924.8	6587	1019171907101560643-1	C57BL6J-638850.43	1479	0.686681	C57BL6J-638850	C57BL6J-638850	wt/wt	M	5.45268	7.95607	7.8	GABA	12 HY GABA	099 SBPV-PVa Six6 Satb2 Gaba	0454 SBPV-PVa Six6 Satb2 Gaba_2	1692 SBPV-PVa Six6 Satb2 Gaba_2	#FF3358	#FF6600	#99FF4D	#A7FF73	#0F2266	099 SBPV-PVa Six6 Satb2 Gaba
1.01917e+18	SCN	14479	6820	1.01917e+18	C57BL6J-638850.43	1431	0.713127	C57BL6J-638850	C57BL6J-638850	wt/wt	M	5.51742	8.43899	7.8	GABA	12 HY GABA	094 SCH Six6 Cdc14a Gaba	0437 SCH Six6 Cdc14a Gaba_2	1614 SCH Six6 Cdc14a Gaba_2	#FF3358	#FF6600	#FFBC4D	#66110F	#592E66	094 SCH | Cck/C1ql3
1019171907101720389-1	SCN	14717.7	6786	1019171907101720389-1	C57BL6J-638850.43	1431	0.753761	C57BL6J-638850	C57BL6J-638850	wt/wt	M	5.71371	8.3174	7.8	GABA	12 HY GABA	094 SCH Six6 Cdc14a Gaba	0437 SCH Six6 Cdc14a Gaba_2	1614 SCH Six6 Cdc14a Gaba_2	#FF3358	#FF6600	#FFBC4D	#66110F	#592E66	094 SCH | Cck/C1ql3
1019171907101720481-2	SCN	18160	7027	1019171907101720481-2	C57BL6J-638850.43	1477	0.647775	C57BL6J-638850	C57BL6J-638850	wt/wt	M	5.76521	8.39771	7.8	GABA	12 HY GABA	099 SBPV-PVa Six6 Satb2 Gaba	0454 SBPV-PVa Six6 Satb2 Gaba_2	1691 SBPV-PVa Six6 Satb2 Gaba_2	#FF3358	#FF6600	#99FF4D	#A7FF73	#5C9987	099 SBPV-PVa Six6 Satb2 Gaba
1019171907101720065-1	SCN	17561.1	6505	1019171907101720065-1	C57BL6J-638850.43	1477	0.721556	C57BL6J-638850	C57BL6J-638850	wt/wt	M	5.53824	8.035	7.8	GABA	12 HY GABA	099 SBPV-PVa Six6 Satb2 Gaba	0454 SBPV-PVa Six6 Satb2 Gaba_2	1691 SBPV-PVa Six6 Satb2 Gaba_2	#FF3358	#FF6600	#99FF4D	#A7FF73	#5C9987	099 SBPV-PVa Six6 Satb2 Gaba
1019171907101560584-1	SCN	17501.6	7173	1019171907101560584-1	C57BL6J-638850.43	1477	0.653573	C57BL6J-638850	C57BL6J-638850	wt/wt	M	5.4057	7.90148	7.8	GABA	12 HY GABA	099 SBPV-PVa Six6 Satb2 Gaba	0454 SBPV-PVa Six6 Satb2 Gaba_2	1691 SBPV-PVa Six6 Satb2 Gaba_2	#FF3358	#FF6600	#99FF4D	#A7FF73	#5C9987	099 SBPV-PVa Six6 Satb2 Gaba
1019171907101550857-1	SCN	17376.4	7191	1019171907101550857-1	C57BL6J-638850.43	1477	0.638727	C57BL6J-638850	C57BL6J-638850	wt/wt	M	5.41814	8.03678	7.8	GABA	12 HY GABA	099 SBPV-PVa Six6 Satb2 Gaba	0454 SBPV-PVa Six6 Satb2 Gaba_2	1691 SBPV-PVa Six6 Satb2 Gaba_2	#FF3358	#FF6600	#99FF4D	#A7FF73	#5C9987	099 SBPV-PVa Six6 Satb2 Gaba
1019171907101720338-1	SCN	13921.3	6631	1019171907101720338-1	C57BL6J-638850.43	1430	0.677455	C57BL6J-638850	C57BL6J-638850	wt/wt	M	5.67986	8.19792	7.8	GABA	12 HY GABA	094 SCH Six6 Cdc14a Gaba	0436 SCH Six6 Cdc14a Gaba_1	1607 SCH Six6 Cdc14a Gaba_1	#FF3358	#FF6600	#FFBC4D	#00FF8D	#CC5CCC	094 SCH | Avp shell
1019171907101720287-2	SCN	13914.8	6741	1019171907101720287-2	C57BL6J-638850.43	1430	0.668163	C57BL6J-638850	C57BL6J-638850	wt/wt	M	5.67076	8.30473	7.8	GABA	12 HY GABA	094 SCH Six6 Cdc14a Gaba	0436 SCH Six6 Cdc14a Gaba_1	1607 SCH Six6 Cdc14a Gaba_1	#FF3358	#FF6600	#FFBC4D	#00FF8D	#CC5CCC	094 SCH | Vip core
1019171907101720141-2	SCN	14018.9	6660	1019171907101720141-2	C57BL6J-638850.43	1430	0.727126	C57BL6J-638850	C57BL6J-638850	wt/wt	M	5.59104	8.12729	7.8	GABA	12 HY GABA	094 SCH Six6 Cdc14a Gaba	0436 SCH Six6 Cdc14a Gaba_1	1607 SCH Six6 Cdc14a Gaba_1	#FF3358	#FF6600	#FFBC4D	#00FF8D	#CC5CCC	094 SCH | Avp shell
1.01917e+18	SCN	13330.2	6720	1.01917e+18	C57BL6J-638850.43	1430	0.785804	C57BL6J-638850	C57BL6J-638850	wt/wt	M	5.42904	8.11024	7.8	GABA	12 HY GABA	094 SCH Six6 Cdc14a Gaba	0436 SCH Six6 Cdc14a Gaba_1	1607 SCH Six6 Cdc14a Gaba_1	#FF3358	#FF6600	#FFBC4D	#00FF8D	#CC5CCC	094 SCH | Avp shell
1019171907101550747-1	SCN	13960.3	6701	1019171907101550747-1	C57BL6J-638850.43	1430	0.779647	C57BL6J-638850	C57BL6J-638850	wt/wt	M	5.37975	8.16919	7.8	GABA	12 HY GABA	094 SCH Six6 Cdc14a Gaba	0436 SCH Six6 Cdc14a Gaba_1	1607 SCH Six6 Cdc14a Gaba_1	#FF3358	#FF6600	#FFBC4D	#00FF8D	#CC5CCC	094 SCH | Avp shell
1.01917e+18	SCN	14145.9	6876	1.01917e+18	C57BL6J-638850.43	1430	0.684815	C57BL6J-638850	C57BL6J-638850	wt/wt	M	5.58143	8.17121	7.8	GABA	12 HY GABA	094 SCH Six6 Cdc14a Gaba	0436 SCH Six6 Cdc14a Gaba_1	1607 SCH Six6 Cdc14a Gaba_1	#FF3358	#FF6600	#FFBC4D	#00FF8D	#CC5CCC	094 SCH | Sst, Cd24a
1019171907101720182-2	SCN	13816.4	6591	1019171907101720182-2	C57BL6J-638850.43	1430	0.640786	C57BL6J-638850	C57BL6J-638850	wt/wt	M	5.64111	8.3289	7.8	GABA	12 HY GABA	094 SCH Six6 Cdc14a Gaba	0436 SCH Six6 Cdc14a Gaba_1	1607 SCH Six6 Cdc14a Gaba_1	#FF3358	#FF6600	#FFBC4D	#00FF8D	#CC5CCC	094 SCH | Vip core
1019171907101720325-1	SCN	14123	6834	1019171907101720325-1	C57BL6J-638850.43	1430	0.665691	C57BL6J-638850	C57BL6J-638850	wt/wt	M	5.67285	8.22808	7.8	GABA	12 HY GABA	094 SCH Six6 Cdc14a Gaba	0436 SCH Six6 Cdc14a Gaba_1	1607 SCH Six6 Cdc14a Gaba_1	#FF3358	#FF6600	#FFBC4D	#00FF8D	#CC5CCC	094 SCH | Avp shell
1019171907101550578-2	SCN	13888.4	6716	1019171907101550578-2	C57BL6J-638850.43	1430	0.6602	C57BL6J-638850	C57BL6J-638850	wt/wt	M	5.33615	8.30249	7.8	GABA	12 HY GABA	094 SCH Six6 Cdc14a Gaba	0436 SCH Six6 Cdc14a Gaba_1	1607 SCH Six6 Cdc14a Gaba_1	#FF3358	#FF6600	#FFBC4D	#00FF8D	#CC5CCC	094 SCH | Vip core
1.01917e+18	SCN	13264.5	6543	1.01917e+18	C57BL6J-638850.43	1430	0.701236	C57BL6J-638850	C57BL6J-638850	wt/wt	M	5.78243	8.37286	7.8	GABA	12 HY GABA	094 SCH Six6 Cdc14a Gaba	0436 SCH Six6 Cdc14a Gaba_1	1607 SCH Six6 Cdc14a Gaba_1	#FF3358	#FF6600	#FFBC4D	#00FF8D	#CC5CCC	094 SCH | Avp shell
1.01917e+18	SCN	13897.1	6850	1.01917e+18	C57BL6J-638850.43	1431	0.642134	C57BL6J-638850	C57BL6J-638850	wt/wt	M	5.25276	8.23401	7.8	GABA	12 HY GABA	094 SCH Six6 Cdc14a Gaba	0437 SCH Six6 Cdc14a Gaba_2	1614 SCH Six6 Cdc14a Gaba_2	#FF3358	#FF6600	#FFBC4D	#66110F	#592E66	094 SCH | Cck/C1ql3
1019171907101710288-2	SCN	18247.1	7327	1019171907101710288-2	C57BL6J-638850.43	2495	0.610346	C57BL6J-638850	C57BL6J-638850	wt/wt	M	6.02733	8.46186	7.8	Glut	14 HY Glut	132 AHN-RCH-LHA Otp Fezf1 Glut	0581 AHN-RCH-LHA Otp Fezf1 Glut_3	2355 AHN-RCH-LHA Otp Fezf1 Glut_3	#2B93DF	#AA0DFE	#2E9957	#99955C	#DEFF73	132 AHN-RCH-LHA Otp Fezf1 Glut
1.01917e+18	SCN	16707.7	6989	1.01917e+18	C57BL6J-638850.43	1624	0.766694	C57BL6J-638850	C57BL6J-638850	wt/wt	M	5.86976	8.15703	7.8	GABA	12 HY GABA	100 AHN Onecut3 Gaba	0456 AHN Onecut3 Gaba_1	1700 AHN Onecut3 Gaba_1	#FF3358	#FF6600	#553D66	#1FCCC0	#B500FF	100 AHN Onecut3 Gaba
1.01917e+18	SCN	16696.3	6982	1.01917e+18	C57BL6J-638850.43	1624	0.597938	C57BL6J-638850	C57BL6J-638850	wt/wt	M	5.19965	8.04641	7.8	GABA	12 HY GABA	100 AHN Onecut3 Gaba	0456 AHN Onecut3 Gaba_1	1700 AHN Onecut3 Gaba_1	#FF3358	#FF6600	#553D66	#1FCCC0	#B500FF	100 AHN Onecut3 Gaba
1.01917e+18	SCN	17753.8	7242	1.01917e+18	C57BL6J-638850.43	1445	0.616691	C57BL6J-638850	C57BL6J-638850	wt/wt	M	6.03967	8.42533	7.8	GABA	11 CNU-HYa GABA	089 PVR Six3 Sox3 Gaba	0413 PVR Six3 Sox3 Gaba_3	1511 PVR Six3 Sox3 Gaba_3	#FF3358	#450099	#4DFFB4	#AB99FF	#CC1FC9	089 PVR Six3 Sox3 Gaba
1019171907101720566-1	SCN	17645.2	7279	1019171907101720566-1	C57BL6J-638850.43	1457	0.660594	C57BL6J-638850	C57BL6J-638850	wt/wt	M	5.78148	8.13498	7.8	GABA	11 CNU-HYa GABA	089 PVR Six3 Sox3 Gaba	0412 PVR Six3 Sox3 Gaba_2	1508 PVR Six3 Sox3 Gaba_2	#FF3358	#450099	#4DFFB4	#6C00FF	#26CC00	089 PVR Six3 Sox3 Gaba
1019171907101560441-2	SCN	17113.4	6936	1019171907101560441-2	C57BL6J-638850.43	1457	0.723522	C57BL6J-638850	C57BL6J-638850	wt/wt	M	5.33449	7.95943	7.8	GABA	11 CNU-HYa GABA	089 PVR Six3 Sox3 Gaba	0412 PVR Six3 Sox3 Gaba_2	1508 PVR Six3 Sox3 Gaba_2	#FF3358	#450099	#4DFFB4	#6C00FF	#26CC00	089 PVR Six3 Sox3 Gaba
1.01917e+18	SCN	18469.5	6992	1.01917e+18	C57BL6J-638850.43	1445	0.7263	C57BL6J-638850	C57BL6J-638850	wt/wt	M	5.85138	8.43628	7.8	GABA	11 CNU-HYa GABA	089 PVR Six3 Sox3 Gaba	0413 PVR Six3 Sox3 Gaba_3	1511 PVR Six3 Sox3 Gaba_3	#FF3358	#450099	#4DFFB4	#AB99FF	#CC1FC9	089 PVR Six3 Sox3 Gaba
1019171907101710311-1	SCN	18010.3	7225	1019171907101710311-1	C57BL6J-638850.43	1445	0.590559	C57BL6J-638850	C57BL6J-638850	wt/wt	M	6.05688	8.4288	7.8	GABA	11 CNU-HYa GABA	089 PVR Six3 Sox3 Gaba	0413 PVR Six3 Sox3 Gaba_3	1511 PVR Six3 Sox3 Gaba_3	#FF3358	#450099	#4DFFB4	#AB99FF	#CC1FC9	089 PVR Six3 Sox3 Gaba
1019171907101720588-1	SCN	18726.7	6999	1019171907101720588-1	C57BL6J-638850.43	1446	0.745891	C57BL6J-638850	C57BL6J-638850	wt/wt	M	5.8252	8.34965	7.8	GABA	11 CNU-HYa GABA	089 PVR Six3 Sox3 Gaba	0413 PVR Six3 Sox3 Gaba_3	1512 PVR Six3 Sox3 Gaba_3	#FF3358	#450099	#4DFFB4	#AB99FF	#993600	089 PVR Six3 Sox3 Gaba
1.01917e+18	SCN	18682	6990	1.01917e+18	C57BL6J-638850.43	1446	0.766195	C57BL6J-638850	C57BL6J-638850	wt/wt	M	5.83938	8.06107	7.8	GABA	11 CNU-HYa GABA	089 PVR Six3 Sox3 Gaba	0413 PVR Six3 Sox3 Gaba_3	1512 PVR Six3 Sox3 Gaba_3	#FF3358	#450099	#4DFFB4	#AB99FF	#993600	089 PVR Six3 Sox3 Gaba
1019171907101730276-2	SCN	17557.3	6555	1019171907101730276-2	C57BL6J-638850.43	1477	0.738975	C57BL6J-638850	C57BL6J-638850	wt/wt	M	5.65445	7.92906	7.8	GABA	12 HY GABA	099 SBPV-PVa Six6 Satb2 Gaba	0454 SBPV-PVa Six6 Satb2 Gaba_2	1691 SBPV-PVa Six6 Satb2 Gaba_2	#FF3358	#FF6600	#99FF4D	#A7FF73	#5C9987	099 SBPV-PVa Six6 Satb2 Gaba
1019171907101730183-1	SCN	17556.3	6933	1019171907101730183-1	C57BL6J-638850.43	1477	0.761858	C57BL6J-638850	C57BL6J-638850	wt/wt	M	5.5995	7.9653	7.8	GABA	12 HY GABA	099 SBPV-PVa Six6 Satb2 Gaba	0454 SBPV-PVa Six6 Satb2 Gaba_2	1691 SBPV-PVa Six6 Satb2 Gaba_2	#FF3358	#FF6600	#99FF4D	#A7FF73	#5C9987	099 SBPV-PVa Six6 Satb2 Gaba
1019171907101560507-1	SCN	17944.6	6875	1019171907101560507-1	C57BL6J-638850.43	1477	0.582622	C57BL6J-638850	C57BL6J-638850	wt/wt	M	5.36341	7.89326	7.8	GABA	12 HY GABA	099 SBPV-PVa Six6 Satb2 Gaba	0454 SBPV-PVa Six6 Satb2 Gaba_2	1691 SBPV-PVa Six6 Satb2 Gaba_2	#FF3358	#FF6600	#99FF4D	#A7FF73	#5C9987	099 SBPV-PVa Six6 Satb2 Gaba
1019171907101550155-2	SCN	17692.7	7274	1019171907101550155-2	C57BL6J-638850.43	1477	0.671695	C57BL6J-638850	C57BL6J-638850	wt/wt	M	5.16141	8.37116	7.8	GABA	12 HY GABA	099 SBPV-PVa Six6 Satb2 Gaba	0454 SBPV-PVa Six6 Satb2 Gaba_2	1691 SBPV-PVa Six6 Satb2 Gaba_2	#FF3358	#FF6600	#99FF4D	#A7FF73	#5C9987	099 SBPV-PVa Six6 Satb2 Gaba
1.01917e+18	SCN	17629.1	6544	1.01917e+18	C57BL6J-638850.43	1477	0.725446	C57BL6J-638850	C57BL6J-638850	wt/wt	M	5.55839	7.84111	7.8	GABA	12 HY GABA	099 SBPV-PVa Six6 Satb2 Gaba	0454 SBPV-PVa Six6 Satb2 Gaba_2	1691 SBPV-PVa Six6 Satb2 Gaba_2	#FF3358	#FF6600	#99FF4D	#A7FF73	#5C9987	099 SBPV-PVa Six6 Satb2 Gaba
1019171907101550462-1	SCN	18044.3	6767	1019171907101550462-1	C57BL6J-638850.43	1477	0.716552	C57BL6J-638850	C57BL6J-638850	wt/wt	M	5.2691	8.13816	7.8	GABA	12 HY GABA	099 SBPV-PVa Six6 Satb2 Gaba	0454 SBPV-PVa Six6 Satb2 Gaba_2	1691 SBPV-PVa Six6 Satb2 Gaba_2	#FF3358	#FF6600	#99FF4D	#A7FF73	#5C9987	099 SBPV-PVa Six6 Satb2 Gaba
1019171907101550098-3	SCN	18037.2	6972	1019171907101550098-3	C57BL6J-638850.43	1444	0.659632	C57BL6J-638850	C57BL6J-638850	wt/wt	M	5.12963	8.34858	7.8	GABA	12 HY GABA	097 PVHd-SBPV Six3 Prox1 Gaba	0445 PVHd-SBPV Six3 Prox1 Gaba_4	1645 PVHd-SBPV Six3 Prox1 Gaba_4	#FF3358	#FF6600	#2E3D66	#48663D	#006066	097 PVHd-SBPV Six3 Prox1 Gaba
1019171907101560480-2	SCN	18225.4	6969	1019171907101560480-2	C57BL6J-638850.43	1444	0.657693	C57BL6J-638850	C57BL6J-638850	wt/wt	M	5.35659	7.94183	7.8	GABA	12 HY GABA	097 PVHd-SBPV Six3 Prox1 Gaba	0445 PVHd-SBPV Six3 Prox1 Gaba_4	1645 PVHd-SBPV Six3 Prox1 Gaba_4	#FF3358	#FF6600	#2E3D66	#48663D	#006066	097 PVHd-SBPV Six3 Prox1 Gaba
1019171907101550181-1	SCN	14703	6937	1019171907101550181-1	C57BL6J-638850.43	1432	0.589831	C57BL6J-638850	C57BL6J-638850	wt/wt	M	5.17064	8.33495	7.8	GABA	12 HY GABA	094 SCH Six6 Cdc14a Gaba	0436 SCH Six6 Cdc14a Gaba_1	1608 SCH Six6 Cdc14a Gaba_1	#FF3358	#FF6600	#FFBC4D	#00FF8D	#5CCC69	094 SCH | Avp shell
1019171907101550691-1	SCN	13927	7102	1019171907101550691-1	C57BL6J-638850.43	1431	0.588019	C57BL6J-638850	C57BL6J-638850	wt/wt	M	5.36301	8.19079	7.8	GABA	12 HY GABA	094 SCH Six6 Cdc14a Gaba	0437 SCH Six6 Cdc14a Gaba_2	1614 SCH Six6 Cdc14a Gaba_2	#FF3358	#FF6600	#FFBC4D	#66110F	#592E66	094 SCH | Cck/C1ql3
1019171907101550671-1	SCN	14444.1	6888	1019171907101550671-1	C57BL6J-638850.43	1431	0.728276	C57BL6J-638850	C57BL6J-638850	wt/wt	M	5.34294	8.15897	7.8	GABA	12 HY GABA	094 SCH Six6 Cdc14a Gaba	0437 SCH Six6 Cdc14a Gaba_2	1614 SCH Six6 Cdc14a Gaba_2	#FF3358	#FF6600	#FFBC4D	#66110F	#592E66	094 SCH | Cck/C1ql3
1.01917e+18	SCN	13927.3	6908	1.01917e+18	C57BL6J-638850.43	1431	0.681403	C57BL6J-638850	C57BL6J-638850	wt/wt	M	5.42488	8.33422	7.8	GABA	12 HY GABA	094 SCH Six6 Cdc14a Gaba	0437 SCH Six6 Cdc14a Gaba_2	1614 SCH Six6 Cdc14a Gaba_2	#FF3358	#FF6600	#FFBC4D	#66110F	#592E66	094 SCH | Cck/C1ql3
1019171907101550805-1	SCN	14179.8	6841	1019171907101550805-1	C57BL6J-638850.43	1431	0.666322	C57BL6J-638850	C57BL6J-638850	wt/wt	M	5.41993	8.24425	7.8	GABA	12 HY GABA	094 SCH Six6 Cdc14a Gaba	0437 SCH Six6 Cdc14a Gaba_2	1614 SCH Six6 Cdc14a Gaba_2	#FF3358	#FF6600	#FFBC4D	#66110F	#592E66	094 SCH | Avp shell
1.01917e+18	SCN	13788.2	7048	1.01917e+18	C57BL6J-638850.43	1431	0.7049	C57BL6J-638850	C57BL6J-638850	wt/wt	M	5.43553	8.21623	7.8	GABA	12 HY GABA	094 SCH Six6 Cdc14a Gaba	0437 SCH Six6 Cdc14a Gaba_2	1614 SCH Six6 Cdc14a Gaba_2	#FF3358	#FF6600	#FFBC4D	#66110F	#592E66	094 SCH | Cck/C1ql3
1019171907101720524-1	SCN	14442.1	6958	1019171907101720524-1	C57BL6J-638850.43	1431	0.645855	C57BL6J-638850	C57BL6J-638850	wt/wt	M	5.77494	8.32682	7.8	GABA	12 HY GABA	094 SCH Six6 Cdc14a Gaba	0437 SCH Six6 Cdc14a Gaba_2	1614 SCH Six6 Cdc14a Gaba_2	#FF3358	#FF6600	#FFBC4D	#66110F	#592E66	094 SCH | Cck/C1ql3
1019171907101550623-2	SCN	14489.1	6811	1019171907101550623-2	C57BL6J-638850.43	1431	0.673772	C57BL6J-638850	C57BL6J-638850	wt/wt	M	5.32379	8.15372	7.8	GABA	12 HY GABA	094 SCH Six6 Cdc14a Gaba	0437 SCH Six6 Cdc14a Gaba_2	1614 SCH Six6 Cdc14a Gaba_2	#FF3358	#FF6600	#FFBC4D	#66110F	#592E66	094 SCH | Cck/C1ql3
1019171907101550174-3	SCN	14257.1	7006	1019171907101550174-3	C57BL6J-638850.43	1431	0.611988	C57BL6J-638850	C57BL6J-638850	wt/wt	M	5.18608	8.45576	7.8	GABA	12 HY GABA	094 SCH Six6 Cdc14a Gaba	0437 SCH Six6 Cdc14a Gaba_2	1614 SCH Six6 Cdc14a Gaba_2	#FF3358	#FF6600	#FFBC4D	#66110F	#592E66	094 SCH | Cck/C1ql3
1019171907101550663-1	SCN	14380.9	6898	1019171907101550663-1	C57BL6J-638850.43	1431	0.691091	C57BL6J-638850	C57BL6J-638850	wt/wt	M	5.34867	8.19065	7.8	GABA	12 HY GABA	094 SCH Six6 Cdc14a Gaba	0437 SCH Six6 Cdc14a Gaba_2	1614 SCH Six6 Cdc14a Gaba_2	#FF3358	#FF6600	#FFBC4D	#66110F	#592E66	094 SCH | Cck/C1ql3
1.01917e+18	SCN	13748.2	6862	1.01917e+18	C57BL6J-638850.43	1431	0.75541	C57BL6J-638850	C57BL6J-638850	wt/wt	M	5.41371	8.40955	7.8	GABA	12 HY GABA	094 SCH Six6 Cdc14a Gaba	0437 SCH Six6 Cdc14a Gaba_2	1614 SCH Six6 Cdc14a Gaba_2	#FF3358	#FF6600	#FFBC4D	#66110F	#592E66	094 SCH | Cck/C1ql3
1019171907101550597-1	SCN	14827	6883	1019171907101550597-1	C57BL6J-638850.43	1431	0.740921	C57BL6J-638850	C57BL6J-638850	wt/wt	M	5.31712	8.13833	7.8	GABA	12 HY GABA	094 SCH Six6 Cdc14a Gaba	0437 SCH Six6 Cdc14a Gaba_2	1614 SCH Six6 Cdc14a Gaba_2	#FF3358	#FF6600	#FFBC4D	#66110F	#592E66	094 SCH | Cck/C1ql3
1019171907101720210-1	SCN	15659.9	6967	1019171907101720210-1	C57BL6J-638850.43	1432	0.576052	C57BL6J-638850	C57BL6J-638850	wt/wt	M	5.61176	8.09969	7.8	GABA	12 HY GABA	094 SCH Six6 Cdc14a Gaba	0436 SCH Six6 Cdc14a Gaba_1	1608 SCH Six6 Cdc14a Gaba_1	#FF3358	#FF6600	#FFBC4D	#00FF8D	#5CCC69	094 SCH | Avp shell
1019171907101730264-2	SCN	18225.3	7012	1019171907101730264-2	C57BL6J-638850.43	1444	0.691474	C57BL6J-638850	C57BL6J-638850	wt/wt	M	5.63995	7.87658	7.8	GABA	12 HY GABA	097 PVHd-SBPV Six3 Prox1 Gaba	0445 PVHd-SBPV Six3 Prox1 Gaba_4	1645 PVHd-SBPV Six3 Prox1 Gaba_4	#FF3358	#FF6600	#2E3D66	#48663D	#006066	097 PVHd-SBPV Six3 Prox1 Gaba
1019171907101730302-2	SCN	18384.1	6876	1019171907101730302-2	C57BL6J-638850.43	1444	0.774259	C57BL6J-638850	C57BL6J-638850	wt/wt	M	5.66901	7.91524	7.8	GABA	12 HY GABA	097 PVHd-SBPV Six3 Prox1 Gaba	0445 PVHd-SBPV Six3 Prox1 Gaba_4	1645 PVHd-SBPV Six3 Prox1 Gaba_4	#FF3358	#FF6600	#2E3D66	#48663D	#006066	097 PVHd-SBPV Six3 Prox1 Gaba
1019171907101720574-1	SCN	16252.4	6747	1019171907101720574-1	C57BL6J-638850.43	1624	0.694759	C57BL6J-638850	C57BL6J-638850	wt/wt	M	5.80204	8.25475	7.8	GABA	12 HY GABA	100 AHN Onecut3 Gaba	0456 AHN Onecut3 Gaba_1	1700 AHN Onecut3 Gaba_1	#FF3358	#FF6600	#553D66	#1FCCC0	#B500FF	100 AHN Onecut3 Gaba
1019171907101720523-1	SCN	16484.6	7033	1019171907101720523-1	C57BL6J-638850.43	1624	0.652679	C57BL6J-638850	C57BL6J-638850	wt/wt	M	5.74062	8.09237	7.8	GABA	12 HY GABA	100 AHN Onecut3 Gaba	0456 AHN Onecut3 Gaba_1	1700 AHN Onecut3 Gaba_1	#FF3358	#FF6600	#553D66	#1FCCC0	#B500FF	100 AHN Onecut3 Gaba
1.01917e+18	SCN	18334.1	6880	1.01917e+18	C57BL6J-638850.43	1445	0.675198	C57BL6J-638850	C57BL6J-638850	wt/wt	M	5.51676	8.25085	7.8	GABA	11 CNU-HYa GABA	089 PVR Six3 Sox3 Gaba	0413 PVR Six3 Sox3 Gaba_3	1511 PVR Six3 Sox3 Gaba_3	#FF3358	#450099	#4DFFB4	#AB99FF	#CC1FC9	089 PVR Six3 Sox3 Gaba
1019171907101710270-2	SCN	17726.4	7122	1019171907101710270-2	C57BL6J-638850.43	1445	0.636496	C57BL6J-638850	C57BL6J-638850	wt/wt	M	5.99906	8.47262	7.8	GABA	11 CNU-HYa GABA	089 PVR Six3 Sox3 Gaba	0413 PVR Six3 Sox3 Gaba_3	1511 PVR Six3 Sox3 Gaba_3	#FF3358	#450099	#4DFFB4	#AB99FF	#CC1FC9	089 PVR Six3 Sox3 Gaba
1019171907101560390-3	SCN	16735.5	6850	1019171907101560390-3	C57BL6J-638850.43	1457	0.734179	C57BL6J-638850	C57BL6J-638850	wt/wt	M	5.30002	7.94883	7.8	GABA	11 CNU-HYa GABA	089 PVR Six3 Sox3 Gaba	0412 PVR Six3 Sox3 Gaba_2	1508 PVR Six3 Sox3 Gaba_2	#FF3358	#450099	#4DFFB4	#6C00FF	#26CC00	089 PVR Six3 Sox3 Gaba
1.01917e+18	SCN	17651.9	6890	1.01917e+18	C57BL6J-638850.43	1457	0.60404	C57BL6J-638850	C57BL6J-638850	wt/wt	M	5.79265	8.01382	7.8	GABA	11 CNU-HYa GABA	089 PVR Six3 Sox3 Gaba	0412 PVR Six3 Sox3 Gaba_2	1508 PVR Six3 Sox3 Gaba_2	#FF3358	#450099	#4DFFB4	#6C00FF	#26CC00	089 PVR Six3 Sox3 Gaba
1.01917e+18	SCN	17399.7	6890	1.01917e+18	C57BL6J-638850.43	1457	0.645983	C57BL6J-638850	C57BL6J-638850	wt/wt	M	5.83303	8.18087	7.8	GABA	11 CNU-HYa GABA	089 PVR Six3 Sox3 Gaba	0412 PVR Six3 Sox3 Gaba_2	1508 PVR Six3 Sox3 Gaba_2	#FF3358	#450099	#4DFFB4	#6C00FF	#26CC00	089 PVR Six3 Sox3 Gaba
1019171907101720551-1	SCN	17159.1	6962	1019171907101720551-1	C57BL6J-638850.43	1457	0.722073	C57BL6J-638850	C57BL6J-638850	wt/wt	M	5.78685	8.26091	7.8	GABA	11 CNU-HYa GABA	089 PVR Six3 Sox3 Gaba	0412 PVR Six3 Sox3 Gaba_2	1508 PVR Six3 Sox3 Gaba_2	#FF3358	#450099	#4DFFB4	#6C00FF	#26CC00	089 PVR Six3 Sox3 Gaba
1019171907101720579-1	SCN	17460.9	7022	1019171907101720579-1	C57BL6J-638850.43	1457	0.666586	C57BL6J-638850	C57BL6J-638850	wt/wt	M	5.79029	8.16665	7.8	GABA	11 CNU-HYa GABA	089 PVR Six3 Sox3 Gaba	0412 PVR Six3 Sox3 Gaba_2	1508 PVR Six3 Sox3 Gaba_2	#FF3358	#450099	#4DFFB4	#6C00FF	#26CC00	089 PVR Six3 Sox3 Gaba
1.01917e+18	SCN	16802.8	6767	1.01917e+18	C57BL6J-638850.43	1457	0.699038	C57BL6J-638850	C57BL6J-638850	wt/wt	M	5.81615	8.01416	7.8	GABA	11 CNU-HYa GABA	089 PVR Six3 Sox3 Gaba	0412 PVR Six3 Sox3 Gaba_2	1508 PVR Six3 Sox3 Gaba_2	#FF3358	#450099	#4DFFB4	#6C00FF	#26CC00	089 PVR Six3 Sox3 Gaba
1019171907101720516-1	SCN	16939.8	6864	1019171907101720516-1	C57BL6J-638850.43	1457	0.748199	C57BL6J-638850	C57BL6J-638850	wt/wt	M	5.75131	8.19003	7.8	GABA	11 CNU-HYa GABA	089 PVR Six3 Sox3 Gaba	0412 PVR Six3 Sox3 Gaba_2	1508 PVR Six3 Sox3 Gaba_2	#FF3358	#450099	#4DFFB4	#6C00FF	#26CC00	089 PVR Six3 Sox3 Gaba
1019171907101710211-2	SCN	17747.5	7148	1019171907101710211-2	C57BL6J-638850.43	1458	0.766548	C57BL6J-638850	C57BL6J-638850	wt/wt	M	5.88037	8.46923	7.8	GABA	11 CNU-HYa GABA	089 PVR Six3 Sox3 Gaba	0412 PVR Six3 Sox3 Gaba_2	1509 PVR Six3 Sox3 Gaba_2	#FF3358	#450099	#4DFFB4	#6C00FF	#C3CC1F	089 PVR Six3 Sox3 Gaba
1019171907101550292-2	SCN	16989.4	7099	1019171907101550292-2	C57BL6J-638850.43	1624	0.562233	C57BL6J-638850	C57BL6J-638850	wt/wt	M	5.2131	8.15868	7.8	GABA	12 HY GABA	100 AHN Onecut3 Gaba	0456 AHN Onecut3 Gaba_1	1700 AHN Onecut3 Gaba_1	#FF3358	#FF6600	#553D66	#1FCCC0	#B500FF	100 AHN Onecut3 Gaba
1019171907101730527-1	SCN	16608.9	6764	1019171907101730527-1	C57BL6J-638850.43	1624	0.781192	C57BL6J-638850	C57BL6J-638850	wt/wt	M	5.82649	7.93174	7.8	GABA	12 HY GABA	100 AHN Onecut3 Gaba	0456 AHN Onecut3 Gaba_1	1700 AHN Onecut3 Gaba_1	#FF3358	#FF6600	#553D66	#1FCCC0	#B500FF	100 AHN Onecut3 Gaba
1.01917e+18	SCN	16614.2	6931	1.01917e+18	C57BL6J-638850.43	1624	0.694252	C57BL6J-638850	C57BL6J-638850	wt/wt	M	5.94412	8.37547	7.8	GABA	12 HY GABA	100 AHN Onecut3 Gaba	0456 AHN Onecut3 Gaba_1	1700 AHN Onecut3 Gaba_1	#FF3358	#FF6600	#553D66	#1FCCC0	#B500FF	100 AHN Onecut3 Gaba
1019171907101550212-1	SCN	16756.5	6941	1019171907101550212-1	C57BL6J-638850.43	1624	0.730706	C57BL6J-638850	C57BL6J-638850	wt/wt	M	5.16613	8.15993	7.8	GABA	12 HY GABA	100 AHN Onecut3 Gaba	0456 AHN Onecut3 Gaba_1	1700 AHN Onecut3 Gaba_1	#FF3358	#FF6600	#553D66	#1FCCC0	#B500FF	100 AHN Onecut3 Gaba
1.01917e+18	SCN	16478.3	6780	1.01917e+18	C57BL6J-638850.43	1624	0.737223	C57BL6J-638850	C57BL6J-638850	wt/wt	M	5.93089	8.39453	7.8	GABA	12 HY GABA	100 AHN Onecut3 Gaba	0456 AHN Onecut3 Gaba_1	1700 AHN Onecut3 Gaba_1	#FF3358	#FF6600	#553D66	#1FCCC0	#B500FF	100 AHN Onecut3 Gaba
1.01917e+18	SCN	16236.3	6869	1.01917e+18	C57BL6J-638850.43	1624	0.687926	C57BL6J-638850	C57BL6J-638850	wt/wt	M	5.85137	8.0601	7.8	GABA	12 HY GABA	100 AHN Onecut3 Gaba	0456 AHN Onecut3 Gaba_1	1700 AHN Onecut3 Gaba_1	#FF3358	#FF6600	#553D66	#1FCCC0	#B500FF	100 AHN Onecut3 Gaba
1019171907101720584-1	SCN	16734.1	6692	1019171907101720584-1	C57BL6J-638850.43	1624	0.691562	C57BL6J-638850	C57BL6J-638850	wt/wt	M	5.78479	8.09485	7.8	GABA	12 HY GABA	100 AHN Onecut3 Gaba	0456 AHN Onecut3 Gaba_1	1700 AHN Onecut3 Gaba_1	#FF3358	#FF6600	#553D66	#1FCCC0	#B500FF	100 AHN Onecut3 Gaba
1019171907101550104-2	SCN	18516.5	6737	1019171907101550104-2	C57BL6J-638850.43	1445	0.569578	C57BL6J-638850	C57BL6J-638850	wt/wt	M	5.115	8.2628	7.8	GABA	11 CNU-HYa GABA	089 PVR Six3 Sox3 Gaba	0413 PVR Six3 Sox3 Gaba_3	1511 PVR Six3 Sox3 Gaba_3	#FF3358	#450099	#4DFFB4	#AB99FF	#CC1FC9	089 PVR Six3 Sox3 Gaba
1019171907101560491-2	SCN	17971.1	7243	1019171907101560491-2	C57BL6J-638850.43	1445	0.734195	C57BL6J-638850	C57BL6J-638850	wt/wt	M	5.36604	7.9542	7.8	GABA	11 CNU-HYa GABA	089 PVR Six3 Sox3 Gaba	0413 PVR Six3 Sox3 Gaba_3	1511 PVR Six3 Sox3 Gaba_3	#FF3358	#450099	#4DFFB4	#AB99FF	#CC1FC9	089 PVR Six3 Sox3 Gaba
1.01917e+18	SCN	17809	7069	1.01917e+18	C57BL6J-638850.43	1458	0.69775	C57BL6J-638850	C57BL6J-638850	wt/wt	M	5.90186	8.50664	7.8	GABA	11 CNU-HYa GABA	089 PVR Six3 Sox3 Gaba	0412 PVR Six3 Sox3 Gaba_2	1509 PVR Six3 Sox3 Gaba_2	#FF3358	#450099	#4DFFB4	#6C00FF	#C3CC1F	089 PVR Six3 Sox3 Gaba
1019171907101710198-2	SCN	18241.8	7210	1019171907101710198-2	C57BL6J-638850.43	1445	0.558641	C57BL6J-638850	C57BL6J-638850	wt/wt	M	5.85857	8.4748	7.8	GABA	11 CNU-HYa GABA	089 PVR Six3 Sox3 Gaba	0413 PVR Six3 Sox3 Gaba_3	1511 PVR Six3 Sox3 Gaba_3	#FF3358	#450099	#4DFFB4	#AB99FF	#CC1FC9	089 PVR Six3 Sox3 Gaba
1019171907201550173-1	SCN	17726.2	6784	1019171907201550173-1	C57BL6J-638850.43	1462	0.602709	C57BL6J-638850	C57BL6J-638850	wt/wt	M	5.15982	8.22197	7.8	GABA	11 CNU-HYa GABA	089 PVR Six3 Sox3 Gaba	0413 PVR Six3 Sox3 Gaba_3	1514 PVR Six3 Sox3 Gaba_3	#FF3358	#450099	#4DFFB4	#AB99FF	#88995C	089 PVR Six3 Sox3 Gaba
1019171907101560468-1	SCN	18460.7	6993	1019171907101560468-1	C57BL6J-638850.43	1445	0.64534	C57BL6J-638850	C57BL6J-638850	wt/wt	M	5.34264	7.90832	7.8	GABA	11 CNU-HYa GABA	089 PVR Six3 Sox3 Gaba	0413 PVR Six3 Sox3 Gaba_3	1511 PVR Six3 Sox3 Gaba_3	#FF3358	#450099	#4DFFB4	#AB99FF	#CC1FC9	089 PVR Six3 Sox3 Gaba
1019171907101550205-2	SCN	18385.5	6958	1019171907101550205-2	C57BL6J-638850.43	1445	0.719824	C57BL6J-638850	C57BL6J-638850	wt/wt	M	5.15503	8.13063	7.8	GABA	11 CNU-HYa GABA	089 PVR Six3 Sox3 Gaba	0413 PVR Six3 Sox3 Gaba_3	1511 PVR Six3 Sox3 Gaba_3	#FF3358	#450099	#4DFFB4	#AB99FF	#CC1FC9	089 PVR Six3 Sox3 Gaba
1019171907101710215-1	SCN	18169.2	7123	1019171907101710215-1	C57BL6J-638850.43	1445	0.632108	C57BL6J-638850	C57BL6J-638850	wt/wt	M	5.88741	8.50104	7.8	GABA	11 CNU-HYa GABA	089 PVR Six3 Sox3 Gaba	0413 PVR Six3 Sox3 Gaba_3	1511 PVR Six3 Sox3 Gaba_3	#FF3358	#450099	#4DFFB4	#AB99FF	#CC1FC9	089 PVR Six3 Sox3 Gaba
1019171907101710286-2	SCN	18357.4	6925	1019171907101710286-2	C57BL6J-638850.43	1445	0.722652	C57BL6J-638850	C57BL6J-638850	wt/wt	M	6.02039	8.44353	7.8	GABA	11 CNU-HYa GABA	089 PVR Six3 Sox3 Gaba	0413 PVR Six3 Sox3 Gaba_3	1511 PVR Six3 Sox3 Gaba_3	#FF3358	#450099	#4DFFB4	#AB99FF	#CC1FC9	089 PVR Six3 Sox3 Gaba
1019171907101560641-1	SCN	20299.3	7413	1019171907101560641-1	C57BL6J-638850.43	2528	0.587301	C57BL6J-638850	C57BL6J-638850	wt/wt	M	5.45329	7.97949	7.8	Glut	14 HY Glut	132 AHN-RCH-LHA Otp Fezf1 Glut	0583 AHN-RCH-LHA Otp Fezf1 Glut_5	2360 AHN-RCH-LHA Otp Fezf1 Glut_5	#2B93DF	#AA0DFE	#2E9957	#23660F	#342E66	132 AHN-RCH-LHA Otp Fezf1 Glut
1.01917e+18	SCN	20198.2	7280	1.01917e+18	C57BL6J-638850.43	2528	0.601853	C57BL6J-638850	C57BL6J-638850	wt/wt	M	5.82535	8.07232	7.8	Glut	14 HY Glut	132 AHN-RCH-LHA Otp Fezf1 Glut	0583 AHN-RCH-LHA Otp Fezf1 Glut_5	2360 AHN-RCH-LHA Otp Fezf1 Glut_5	#2B93DF	#AA0DFE	#2E9957	#23660F	#342E66	132 AHN-RCH-LHA Otp Fezf1 Glut
1.01917e+18	SCN	20050	7449	1.01917e+18	C57BL6J-638850.43	2528	0.582066	C57BL6J-638850	C57BL6J-638850	wt/wt	M	5.90808	8.20012	7.8	Glut	14 HY Glut	132 AHN-RCH-LHA Otp Fezf1 Glut	0583 AHN-RCH-LHA Otp Fezf1 Glut_5	2360 AHN-RCH-LHA Otp Fezf1 Glut_5	#2B93DF	#AA0DFE	#2E9957	#23660F	#342E66	132 AHN-RCH-LHA Otp Fezf1 Glut
1.01917e+18	SCN	20153	7455	1.01917e+18	C57BL6J-638850.43	2528	0.616096	C57BL6J-638850	C57BL6J-638850	wt/wt	M	5.99789	8.2653	7.8	Glut	14 HY Glut	132 AHN-RCH-LHA Otp Fezf1 Glut	0583 AHN-RCH-LHA Otp Fezf1 Glut_5	2360 AHN-RCH-LHA Otp Fezf1 Glut_5	#2B93DF	#AA0DFE	#2E9957	#23660F	#342E66	132 AHN-RCH-LHA Otp Fezf1 Glut
1.01917e+18	SCN	18764.1	7152	1.01917e+18	C57BL6J-638850.43	2495	0.502837	C57BL6J-638850	C57BL6J-638850	wt/wt	M	5.84517	8.47421	7.8	Glut	14 HY Glut	132 AHN-RCH-LHA Otp Fezf1 Glut	0581 AHN-RCH-LHA Otp Fezf1 Glut_3	2355 AHN-RCH-LHA Otp Fezf1 Glut_3	#2B93DF	#AA0DFE	#2E9957	#99955C	#DEFF73	132 AHN-RCH-LHA Otp Fezf1 Glut
1.01917e+18	SCN	17554	7329	1.01917e+18	C57BL6J-638850.43	1867	0.561936	C57BL6J-638850	C57BL6J-638850	wt/wt	M	5.60141	8.0209	7.8	GABA	12 HY GABA	106 PVpo-VMPO-MPN Hmx2 Gaba	0482 PVpo-VMPO-MPN Hmx2 Gaba_1	1875 PVpo-VMPO-MPN Hmx2 Gaba_1	#FF3358	#FF6600	#3D4566	#DB4DFF	#EA99FF	106 PVpo-VMPO-MPN Hmx2 Gaba
1019171907101720568-1	SCN	17707.5	7042	1019171907101720568-1	C57BL6J-638850.43	1867	0.629191	C57BL6J-638850	C57BL6J-638850	wt/wt	M	5.77234	8.09434	7.8	GABA	12 HY GABA	106 PVpo-VMPO-MPN Hmx2 Gaba	0482 PVpo-VMPO-MPN Hmx2 Gaba_1	1875 PVpo-VMPO-MPN Hmx2 Gaba_1	#FF3358	#FF6600	#3D4566	#DB4DFF	#EA99FF	106 PVpo-VMPO-MPN Hmx2 Gaba
1019171907101720591-1	SCN	18022.2	7030	1019171907101720591-1	C57BL6J-638850.43	1458	0.761662	C57BL6J-638850	C57BL6J-638850	wt/wt	M	5.82552	8.3154	7.8	GABA	11 CNU-HYa GABA	089 PVR Six3 Sox3 Gaba	0412 PVR Six3 Sox3 Gaba_2	1509 PVR Six3 Sox3 Gaba_2	#FF3358	#450099	#4DFFB4	#6C00FF	#C3CC1F	089 PVR Six3 Sox3 Gaba
1019171907101550324-3	SCN	13887.4	6631	1019171907101550324-3	C57BL6J-638850.43	1430	0.611506	C57BL6J-638850	C57BL6J-638850	wt/wt	M	5.24005	8.26186	7.8	GABA	12 HY GABA	094 SCH Six6 Cdc14a Gaba	0436 SCH Six6 Cdc14a Gaba_1	1607 SCH Six6 Cdc14a Gaba_1	#FF3358	#FF6600	#FFBC4D	#00FF8D	#CC5CCC	094 SCH | Avp shell
1019171907101720193-2	SCN	14821.3	6690	1019171907101720193-2	C57BL6J-638850.43	1430	0.735495	C57BL6J-638850	C57BL6J-638850	wt/wt	M	5.6177	8.15881	7.8	GABA	12 HY GABA	094 SCH Six6 Cdc14a Gaba	0436 SCH Six6 Cdc14a Gaba_1	1607 SCH Six6 Cdc14a Gaba_1	#FF3358	#FF6600	#FFBC4D	#00FF8D	#CC5CCC	094 SCH | Avp shell
1019171907101550653-1	SCN	13878.5	6982	1019171907101550653-1	C57BL6J-638850.43	1430	0.709862	C57BL6J-638850	C57BL6J-638850	wt/wt	M	5.3376	8.13784	7.8	GABA	12 HY GABA	094 SCH Six6 Cdc14a Gaba	0436 SCH Six6 Cdc14a Gaba_1	1607 SCH Six6 Cdc14a Gaba_1	#FF3358	#FF6600	#FFBC4D	#00FF8D	#CC5CCC	094 SCH | Avp shell
1019171907101550683-1	SCN	14454.1	6779	1019171907101550683-1	C57BL6J-638850.43	1430	0.753669	C57BL6J-638850	C57BL6J-638850	wt/wt	M	5.34332	8.09712	7.8	GABA	12 HY GABA	094 SCH Six6 Cdc14a Gaba	0436 SCH Six6 Cdc14a Gaba_1	1607 SCH Six6 Cdc14a Gaba_1	#FF3358	#FF6600	#FFBC4D	#00FF8D	#CC5CCC	094 SCH | Avp shell
1019171907101550745-1	SCN	14959.9	6654	1019171907101550745-1	C57BL6J-638850.43	1432	0.714835	C57BL6J-638850	C57BL6J-638850	wt/wt	M	5.36416	8.0758	7.8	GABA	12 HY GABA	094 SCH Six6 Cdc14a Gaba	0436 SCH Six6 Cdc14a Gaba_1	1608 SCH Six6 Cdc14a Gaba_1	#FF3358	#FF6600	#FFBC4D	#00FF8D	#5CCC69	094 SCH | Avp shell
1.01917e+18	SCN	13511.2	6530	1.01917e+18	C57BL6J-638850.43	1430	0.716754	C57BL6J-638850	C57BL6J-638850	wt/wt	M	5.63827	8.45754	7.8	GABA	12 HY GABA	094 SCH Six6 Cdc14a Gaba	0436 SCH Six6 Cdc14a Gaba_1	1607 SCH Six6 Cdc14a Gaba_1	#FF3358	#FF6600	#FFBC4D	#00FF8D	#CC5CCC	094 SCH | Avp shell
1019171907101720423-1	SCN	13960.5	6604	1019171907101720423-1	C57BL6J-638850.43	1430	0.69169	C57BL6J-638850	C57BL6J-638850	wt/wt	M	5.73639	8.39451	7.8	GABA	12 HY GABA	094 SCH Six6 Cdc14a Gaba	0436 SCH Six6 Cdc14a Gaba_1	1607 SCH Six6 Cdc14a Gaba_1	#FF3358	#FF6600	#FFBC4D	#00FF8D	#CC5CCC	094 SCH | Vip core
1019171907101720356-1	SCN	14202.3	6810	1019171907101720356-1	C57BL6J-638850.43	1430	0.757616	C57BL6J-638850	C57BL6J-638850	wt/wt	M	5.67463	8.13698	7.8	GABA	12 HY GABA	094 SCH Six6 Cdc14a Gaba	0436 SCH Six6 Cdc14a Gaba_1	1607 SCH Six6 Cdc14a Gaba_1	#FF3358	#FF6600	#FFBC4D	#00FF8D	#CC5CCC	094 SCH | Avp shell
1019171907101720273-2	SCN	13755.4	6620	1019171907101720273-2	C57BL6J-638850.43	1430	0.700036	C57BL6J-638850	C57BL6J-638850	wt/wt	M	5.65574	8.22053	7.8	GABA	12 HY GABA	094 SCH Six6 Cdc14a Gaba	0436 SCH Six6 Cdc14a Gaba_1	1607 SCH Six6 Cdc14a Gaba_1	#FF3358	#FF6600	#FFBC4D	#00FF8D	#CC5CCC	094 SCH | Vip core
1.01917e+18	SCN	13861.7	6606	1.01917e+18	C57BL6J-638850.43	1430	0.701688	C57BL6J-638850	C57BL6J-638850	wt/wt	M	5.65655	8.18642	7.8	GABA	12 HY GABA	094 SCH Six6 Cdc14a Gaba	0436 SCH Six6 Cdc14a Gaba_1	1607 SCH Six6 Cdc14a Gaba_1	#FF3358	#FF6600	#FFBC4D	#00FF8D	#CC5CCC	094 SCH | Avp shell
1019171907101720241-2	SCN	13761.2	6589	1019171907101720241-2	C57BL6J-638850.43	1430	0.732277	C57BL6J-638850	C57BL6J-638850	wt/wt	M	5.63778	8.18205	7.8	GABA	12 HY GABA	094 SCH Six6 Cdc14a Gaba	0436 SCH Six6 Cdc14a Gaba_1	1607 SCH Six6 Cdc14a Gaba_1	#FF3358	#FF6600	#FFBC4D	#00FF8D	#CC5CCC	094 SCH | Avp shell
1.01917e+18	SCN	13587.6	6644	1.01917e+18	C57BL6J-638850.43	1430	0.757692	C57BL6J-638850	C57BL6J-638850	wt/wt	M	5.53873	8.24616	7.8	GABA	12 HY GABA	094 SCH Six6 Cdc14a Gaba	0436 SCH Six6 Cdc14a Gaba_1	1607 SCH Six6 Cdc14a Gaba_1	#FF3358	#FF6600	#FFBC4D	#00FF8D	#CC5CCC	094 SCH | Avp shell
1019171907101720393-1	SCN	13956.4	6979	1019171907101720393-1	C57BL6J-638850.43	1430	0.757215	C57BL6J-638850	C57BL6J-638850	wt/wt	M	5.69794	8.19986	7.8	GABA	12 HY GABA	094 SCH Six6 Cdc14a Gaba	0436 SCH Six6 Cdc14a Gaba_1	1607 SCH Six6 Cdc14a Gaba_1	#FF3358	#FF6600	#FFBC4D	#00FF8D	#CC5CCC	094 SCH | Avp shell
1019171907101720201-1	SCN	13652.5	6950	1019171907101720201-1	C57BL6J-638850.43	1430	0.687377	C57BL6J-638850	C57BL6J-638850	wt/wt	M	5.6357	8.26257	7.8	GABA	12 HY GABA	094 SCH Six6 Cdc14a Gaba	0436 SCH Six6 Cdc14a Gaba_1	1607 SCH Six6 Cdc14a Gaba_1	#FF3358	#FF6600	#FFBC4D	#00FF8D	#CC5CCC	094 SCH | Avp shell
1019171907101550656-1	SCN	13772.6	6603	1019171907101550656-1	C57BL6J-638850.43	1430	0.762441	C57BL6J-638850	C57BL6J-638850	wt/wt	M	5.34774	8.20787	7.8	GABA	12 HY GABA	094 SCH Six6 Cdc14a Gaba	0436 SCH Six6 Cdc14a Gaba_1	1607 SCH Six6 Cdc14a Gaba_1	#FF3358	#FF6600	#FFBC4D	#00FF8D	#CC5CCC	094 SCH | Avp shell
1019171907101720197-2	SCN	13668.1	6547	1019171907101720197-2	C57BL6J-638850.43	1430	0.754491	C57BL6J-638850	C57BL6J-638850	wt/wt	M	5.63713	8.27866	7.8	GABA	12 HY GABA	094 SCH Six6 Cdc14a Gaba	0436 SCH Six6 Cdc14a Gaba_1	1607 SCH Six6 Cdc14a Gaba_1	#FF3358	#FF6600	#FFBC4D	#00FF8D	#CC5CCC	094 SCH | Vip core
1.01917e+18	SCN	13686.2	6635	1.01917e+18	C57BL6J-638850.43	1430	0.776845	C57BL6J-638850	C57BL6J-638850	wt/wt	M	5.69915	8.26035	7.8	GABA	12 HY GABA	094 SCH Six6 Cdc14a Gaba	0436 SCH Six6 Cdc14a Gaba_1	1607 SCH Six6 Cdc14a Gaba_1	#FF3358	#FF6600	#FFBC4D	#00FF8D	#CC5CCC	094 SCH | Avp shell
1019171907101550684-1	SCN	14643.7	6755	1019171907101550684-1	C57BL6J-638850.43	1430	0.54273	C57BL6J-638850	C57BL6J-638850	wt/wt	M	5.35496	8.156	7.8	GABA	12 HY GABA	094 SCH Six6 Cdc14a Gaba	0436 SCH Six6 Cdc14a Gaba_1	1607 SCH Six6 Cdc14a Gaba_1	#FF3358	#FF6600	#FFBC4D	#00FF8D	#CC5CCC	094 SCH | Avp shell
1019171907101720286-1	SCN	13897.3	6638	1019171907101720286-1	C57BL6J-638850.43	1430	0.691484	C57BL6J-638850	C57BL6J-638850	wt/wt	M	5.66293	8.2277	7.8	GABA	12 HY GABA	094 SCH Six6 Cdc14a Gaba	0436 SCH Six6 Cdc14a Gaba_1	1607 SCH Six6 Cdc14a Gaba_1	#FF3358	#FF6600	#FFBC4D	#00FF8D	#CC5CCC	094 SCH | Avp shell
1019171907101720464-2	SCN	13614.4	6590	1019171907101720464-2	C57BL6J-638850.43	1430	0.79052	C57BL6J-638850	C57BL6J-638850	wt/wt	M	5.73087	8.25128	7.8	GABA	12 HY GABA	094 SCH Six6 Cdc14a Gaba	0436 SCH Six6 Cdc14a Gaba_1	1607 SCH Six6 Cdc14a Gaba_1	#FF3358	#FF6600	#FFBC4D	#00FF8D	#CC5CCC	094 SCH | Avp shell
1.01917e+18	SCN	13588.1	6604	1.01917e+18	C57BL6J-638850.43	1430	0.747142	C57BL6J-638850	C57BL6J-638850	wt/wt	M	5.52243	8.27622	7.8	GABA	12 HY GABA	094 SCH Six6 Cdc14a Gaba	0436 SCH Six6 Cdc14a Gaba_1	1607 SCH Six6 Cdc14a Gaba_1	#FF3358	#FF6600	#FFBC4D	#00FF8D	#CC5CCC	094 SCH | Avp shell
1019171907101550814-1	SCN	13513.3	6592	1019171907101550814-1	C57BL6J-638850.43	1430	0.701031	C57BL6J-638850	C57BL6J-638850	wt/wt	M	5.42315	8.22938	7.8	GABA	12 HY GABA	094 SCH Six6 Cdc14a Gaba	0436 SCH Six6 Cdc14a Gaba_1	1607 SCH Six6 Cdc14a Gaba_1	#FF3358	#FF6600	#FFBC4D	#00FF8D	#CC5CCC	094 SCH | Avp shell
1.01917e+18	SCN	14482.7	6737	1.01917e+18	C57BL6J-638850.43	1430	0.688722	C57BL6J-638850	C57BL6J-638850	wt/wt	M	5.19622	8.29179	7.8	GABA	12 HY GABA	094 SCH Six6 Cdc14a Gaba	0436 SCH Six6 Cdc14a Gaba_1	1607 SCH Six6 Cdc14a Gaba_1	#FF3358	#FF6600	#FFBC4D	#00FF8D	#CC5CCC	094 SCH | Avp shell
1019171907101720249-2	SCN	14037.1	6664	1019171907101720249-2	C57BL6J-638850.43	1430	0.783046	C57BL6J-638850	C57BL6J-638850	wt/wt	M	5.64425	8.20417	7.8	GABA	12 HY GABA	094 SCH Six6 Cdc14a Gaba	0436 SCH Six6 Cdc14a Gaba_1	1607 SCH Six6 Cdc14a Gaba_1	#FF3358	#FF6600	#FFBC4D	#00FF8D	#CC5CCC	094 SCH | Avp shell
1019171907101720415-1	SCN	13620.5	6641	1019171907101720415-1	C57BL6J-638850.43	1430	0.591711	C57BL6J-638850	C57BL6J-638850	wt/wt	M	5.73608	8.42426	7.8	GABA	12 HY GABA	094 SCH Six6 Cdc14a Gaba	0436 SCH Six6 Cdc14a Gaba_1	1607 SCH Six6 Cdc14a Gaba_1	#FF3358	#FF6600	#FFBC4D	#00FF8D	#CC5CCC	094 SCH | Avp shell
1019171907101720077-1	SCN	13716.7	6738	1019171907101720077-1	C57BL6J-638850.43	1430	0.759019	C57BL6J-638850	C57BL6J-638850	wt/wt	M	5.58612	8.2933	7.8	GABA	12 HY GABA	094 SCH Six6 Cdc14a Gaba	0436 SCH Six6 Cdc14a Gaba_1	1607 SCH Six6 Cdc14a Gaba_1	#FF3358	#FF6600	#FFBC4D	#00FF8D	#CC5CCC	094 SCH | Avp shell
1019171907101550498-1	SCN	13565.3	6536	1019171907101550498-1	C57BL6J-638850.43	1430	0.699387	C57BL6J-638850	C57BL6J-638850	wt/wt	M	5.30724	8.30097	7.8	GABA	12 HY GABA	094 SCH Six6 Cdc14a Gaba	0436 SCH Six6 Cdc14a Gaba_1	1607 SCH Six6 Cdc14a Gaba_1	#FF3358	#FF6600	#FFBC4D	#00FF8D	#CC5CCC	094 SCH | Avp shell
1019171907101550193-3	SCN	14096.9	6885	1019171907101550193-3	C57BL6J-638850.43	1430	0.691075	C57BL6J-638850	C57BL6J-638850	wt/wt	M	5.18708	8.38299	7.8	GABA	12 HY GABA	094 SCH Six6 Cdc14a Gaba	0436 SCH Six6 Cdc14a Gaba_1	1607 SCH Six6 Cdc14a Gaba_1	#FF3358	#FF6600	#FFBC4D	#00FF8D	#CC5CCC	094 SCH | Cck/C1ql3
1019171907101720185-2	SCN	13475.5	6646	1019171907101720185-2	C57BL6J-638850.43	1430	0.744775	C57BL6J-638850	C57BL6J-638850	wt/wt	M	5.61868	8.18802	7.8	GABA	12 HY GABA	094 SCH Six6 Cdc14a Gaba	0436 SCH Six6 Cdc14a Gaba_1	1607 SCH Six6 Cdc14a Gaba_1	#FF3358	#FF6600	#FFBC4D	#00FF8D	#CC5CCC	094 SCH | Avp shell
1019171907101550609-1	SCN	13821.2	6614	1019171907101550609-1	C57BL6J-638850.43	1430	0.617086	C57BL6J-638850	C57BL6J-638850	wt/wt	M	5.35878	8.38803	7.8	GABA	12 HY GABA	094 SCH Six6 Cdc14a Gaba	0436 SCH Six6 Cdc14a Gaba_1	1607 SCH Six6 Cdc14a Gaba_1	#FF3358	#FF6600	#FFBC4D	#00FF8D	#CC5CCC	094 SCH | Vip core
1019171907101550722-1	SCN	13736.2	6605	1019171907101550722-1	C57BL6J-638850.43	1430	0.756749	C57BL6J-638850	C57BL6J-638850	wt/wt	M	5.39517	8.31424	7.8	GABA	12 HY GABA	094 SCH Six6 Cdc14a Gaba	0436 SCH Six6 Cdc14a Gaba_1	1607 SCH Six6 Cdc14a Gaba_1	#FF3358	#FF6600	#FFBC4D	#00FF8D	#CC5CCC	094 SCH | Avp shell
1019171907101720132-2	SCN	14066.1	6649	1019171907101720132-2	C57BL6J-638850.43	1430	0.732987	C57BL6J-638850	C57BL6J-638850	wt/wt	M	5.59759	8.19327	7.8	GABA	12 HY GABA	094 SCH Six6 Cdc14a Gaba	0436 SCH Six6 Cdc14a Gaba_1	1607 SCH Six6 Cdc14a Gaba_1	#FF3358	#FF6600	#FFBC4D	#00FF8D	#CC5CCC	094 SCH | Avp shell
1019171907101720370-1	SCN	13883.5	6717	1019171907101720370-1	C57BL6J-638850.43	1430	0.719415	C57BL6J-638850	C57BL6J-638850	wt/wt	M	5.70441	8.31284	7.8	GABA	12 HY GABA	094 SCH Six6 Cdc14a Gaba	0436 SCH Six6 Cdc14a Gaba_1	1607 SCH Six6 Cdc14a Gaba_1	#FF3358	#FF6600	#FFBC4D	#00FF8D	#CC5CCC	094 SCH | Vip core
1.01917e+18	SCN	13810	6617	1.01917e+18	C57BL6J-638850.43	1430	0.697139	C57BL6J-638850	C57BL6J-638850	wt/wt	M	5.35595	8.20232	7.8	GABA	12 HY GABA	094 SCH Six6 Cdc14a Gaba	0436 SCH Six6 Cdc14a Gaba_1	1607 SCH Six6 Cdc14a Gaba_1	#FF3358	#FF6600	#FFBC4D	#00FF8D	#CC5CCC	094 SCH | Vip core
1019171907101550674-1	SCN	13664.3	6984	1019171907101550674-1	C57BL6J-638850.43	1430	0.763891	C57BL6J-638850	C57BL6J-638850	wt/wt	M	5.33323	8.07175	7.8	GABA	12 HY GABA	094 SCH Six6 Cdc14a Gaba	0436 SCH Six6 Cdc14a Gaba_1	1607 SCH Six6 Cdc14a Gaba_1	#FF3358	#FF6600	#FFBC4D	#00FF8D	#CC5CCC	094 SCH | Avp shell
1019171907101720387-2	SCN	13312.3	6654	1019171907101720387-2	C57BL6J-638850.43	1430	0.668886	C57BL6J-638850	C57BL6J-638850	wt/wt	M	5.7258	8.40364	7.8	GABA	12 HY GABA	094 SCH Six6 Cdc14a Gaba	0436 SCH Six6 Cdc14a Gaba_1	1607 SCH Six6 Cdc14a Gaba_1	#FF3358	#FF6600	#FFBC4D	#00FF8D	#CC5CCC	094 SCH | Avp shell
1019171907101550801-1	SCN	13520.7	6698	1019171907101550801-1	C57BL6J-638850.43	1430	0.559428	C57BL6J-638850	C57BL6J-638850	wt/wt	M	5.4441	8.41171	7.8	GABA	12 HY GABA	094 SCH Six6 Cdc14a Gaba	0436 SCH Six6 Cdc14a Gaba_1	1607 SCH Six6 Cdc14a Gaba_1	#FF3358	#FF6600	#FFBC4D	#00FF8D	#CC5CCC	094 SCH | Vip core
1.01917e+18	SCN	14444.5	6763	1.01917e+18	C57BL6J-638850.43	1430	0.636356	C57BL6J-638850	C57BL6J-638850	wt/wt	M	5.7552	8.24326	7.8	GABA	12 HY GABA	094 SCH Six6 Cdc14a Gaba	0436 SCH Six6 Cdc14a Gaba_1	1607 SCH Six6 Cdc14a Gaba_1	#FF3358	#FF6600	#FFBC4D	#00FF8D	#CC5CCC	094 SCH | Avp shell
1.01917e+18	SCN	13154.4	6684	1.01917e+18	C57BL6J-638850.43	1430	0.718908	C57BL6J-638850	C57BL6J-638850	wt/wt	M	5.57454	8.37028	7.8	GABA	12 HY GABA	094 SCH Six6 Cdc14a Gaba	0436 SCH Six6 Cdc14a Gaba_1	1607 SCH Six6 Cdc14a Gaba_1	#FF3358	#FF6600	#FFBC4D	#00FF8D	#CC5CCC	094 SCH | Avp shell
1019171907101720147-2	SCN	13736.2	6602	1019171907101720147-2	C57BL6J-638850.43	1430	0.782054	C57BL6J-638850	C57BL6J-638850	wt/wt	M	5.61193	8.23133	7.8	GABA	12 HY GABA	094 SCH Six6 Cdc14a Gaba	0436 SCH Six6 Cdc14a Gaba_1	1607 SCH Six6 Cdc14a Gaba_1	#FF3358	#FF6600	#FFBC4D	#00FF8D	#CC5CCC	094 SCH | Avp shell
1.01917e+18	SCN	13596	6590	1.01917e+18	C57BL6J-638850.43	1430	0.725814	C57BL6J-638850	C57BL6J-638850	wt/wt	M	5.53055	8.22021	7.8	GABA	12 HY GABA	094 SCH Six6 Cdc14a Gaba	0436 SCH Six6 Cdc14a Gaba_1	1607 SCH Six6 Cdc14a Gaba_1	#FF3358	#FF6600	#FFBC4D	#00FF8D	#CC5CCC	094 SCH | Avp shell
1019171907101720388-1	SCN	13552.5	6588	1019171907101720388-1	C57BL6J-638850.43	1430	0.787224	C57BL6J-638850	C57BL6J-638850	wt/wt	M	5.69494	8.18565	7.8	GABA	12 HY GABA	094 SCH Six6 Cdc14a Gaba	0436 SCH Six6 Cdc14a Gaba_1	1607 SCH Six6 Cdc14a Gaba_1	#FF3358	#FF6600	#FFBC4D	#00FF8D	#CC5CCC	094 SCH | Avp shell
1.01917e+18	SCN	13701.4	6671	1.01917e+18	C57BL6J-638850.43	1430	0.676715	C57BL6J-638850	C57BL6J-638850	wt/wt	M	5.74865	8.27402	7.8	GABA	12 HY GABA	094 SCH Six6 Cdc14a Gaba	0436 SCH Six6 Cdc14a Gaba_1	1607 SCH Six6 Cdc14a Gaba_1	#FF3358	#FF6600	#FFBC4D	#00FF8D	#CC5CCC	094 SCH | Avp shell
1.01917e+18	SCN	13534.5	6544	1.01917e+18	C57BL6J-638850.43	1430	0.761602	C57BL6J-638850	C57BL6J-638850	wt/wt	M	5.55483	8.19953	7.8	GABA	12 HY GABA	094 SCH Six6 Cdc14a Gaba	0436 SCH Six6 Cdc14a Gaba_1	1607 SCH Six6 Cdc14a Gaba_1	#FF3358	#FF6600	#FFBC4D	#00FF8D	#CC5CCC	094 SCH | Avp shell
1019171907101720265-2	SCN	13715.4	6740	1019171907101720265-2	C57BL6J-638850.43	1430	0.518401	C57BL6J-638850	C57BL6J-638850	wt/wt	M	5.64456	8.17472	7.8	GABA	12 HY GABA	094 SCH Six6 Cdc14a Gaba	0436 SCH Six6 Cdc14a Gaba_1	1607 SCH Six6 Cdc14a Gaba_1	#FF3358	#FF6600	#FFBC4D	#00FF8D	#CC5CCC	094 SCH | Avp shell
1019171907101550393-2	SCN	13701.1	6624	1019171907101550393-2	C57BL6J-638850.43	1430	0.655153	C57BL6J-638850	C57BL6J-638850	wt/wt	M	5.26658	8.27107	7.8	GABA	12 HY GABA	094 SCH Six6 Cdc14a Gaba	0436 SCH Six6 Cdc14a Gaba_1	1607 SCH Six6 Cdc14a Gaba_1	#FF3358	#FF6600	#FFBC4D	#00FF8D	#CC5CCC	094 SCH | Avp shell
1019171907101550281-2	SCN	13872.1	6619	1019171907101550281-2	C57BL6J-638850.43	1430	0.667007	C57BL6J-638850	C57BL6J-638850	wt/wt	M	5.22303	8.28511	7.8	GABA	12 HY GABA	094 SCH Six6 Cdc14a Gaba	0436 SCH Six6 Cdc14a Gaba_1	1607 SCH Six6 Cdc14a Gaba_1	#FF3358	#FF6600	#FFBC4D	#00FF8D	#CC5CCC	094 SCH | Avp shell
1019171907101720116-1	SCN	14181.2	6717	1019171907101720116-1	C57BL6J-638850.43	1430	0.776218	C57BL6J-638850	C57BL6J-638850	wt/wt	M	5.5759	8.12241	7.8	GABA	12 HY GABA	094 SCH Six6 Cdc14a Gaba	0436 SCH Six6 Cdc14a Gaba_1	1607 SCH Six6 Cdc14a Gaba_1	#FF3358	#FF6600	#FFBC4D	#00FF8D	#CC5CCC	094 SCH | Avp shell
1019171907101550261-2	SCN	13634.9	6581	1019171907101550261-2	C57BL6J-638850.43	1430	0.703676	C57BL6J-638850	C57BL6J-638850	wt/wt	M	5.23873	8.4088	7.8	GABA	12 HY GABA	094 SCH Six6 Cdc14a Gaba	0436 SCH Six6 Cdc14a Gaba_1	1607 SCH Six6 Cdc14a Gaba_1	#FF3358	#FF6600	#FFBC4D	#00FF8D	#CC5CCC	094 SCH | Avp shell
1.01917e+18	SCN	14036.6	6752	1.01917e+18	C57BL6J-638850.43	1427	0.642034	C57BL6J-638850	C57BL6J-638850	wt/wt	M	5.71112	8.21501	7.8	GABA	12 HY GABA	094 SCH Six6 Cdc14a Gaba	0437 SCH Six6 Cdc14a Gaba_2	1612 SCH Six6 Cdc14a Gaba_2	#FF3358	#FF6600	#FFBC4D	#66110F	#CC945C	094 SCH | Vip core
1019171907101550360-2	SCN	13593.9	6615	1019171907101550360-2	C57BL6J-638850.43	1430	0.580293	C57BL6J-638850	C57BL6J-638850	wt/wt	M	5.2537	8.27979	7.8	GABA	12 HY GABA	094 SCH Six6 Cdc14a Gaba	0436 SCH Six6 Cdc14a Gaba_1	1607 SCH Six6 Cdc14a Gaba_1	#FF3358	#FF6600	#FFBC4D	#00FF8D	#CC5CCC	094 SCH | Avp shell
1019171907101550490-2	SCN	14921.9	7325	1019171907101550490-2	C57BL6J-638850.43	1427	0.56554	C57BL6J-638850	C57BL6J-638850	wt/wt	M	5.28374	8.17832	7.8	GABA	12 HY GABA	094 SCH Six6 Cdc14a Gaba	0437 SCH Six6 Cdc14a Gaba_2	1612 SCH Six6 Cdc14a Gaba_2	#FF3358	#FF6600	#FFBC4D	#66110F	#CC945C	094 SCH | Sst, Cd24a
1.01917e+18	SCN	13738.9	6658	1.01917e+18	C57BL6J-638850.43	1430	0.728369	C57BL6J-638850	C57BL6J-638850	wt/wt	M	5.63266	8.42802	7.8	GABA	12 HY GABA	094 SCH Six6 Cdc14a Gaba	0436 SCH Six6 Cdc14a Gaba_1	1607 SCH Six6 Cdc14a Gaba_1	#FF3358	#FF6600	#FFBC4D	#00FF8D	#CC5CCC	094 SCH | Vip core
1019171907101720376-2	SCN	13572.9	6686	1019171907101720376-2	C57BL6J-638850.43	1430	0.716231	C57BL6J-638850	C57BL6J-638850	wt/wt	M	5.71251	8.35933	7.8	GABA	12 HY GABA	094 SCH Six6 Cdc14a Gaba	0436 SCH Six6 Cdc14a Gaba_1	1607 SCH Six6 Cdc14a Gaba_1	#FF3358	#FF6600	#FFBC4D	#00FF8D	#CC5CCC	094 SCH | Avp shell
1019171907101550366-3	SCN	13837	6607	1019171907101550366-3	C57BL6J-638850.43	1430	0.533494	C57BL6J-638850	C57BL6J-638850	wt/wt	M	5.27039	8.34463	7.8	GABA	12 HY GABA	094 SCH Six6 Cdc14a Gaba	0436 SCH Six6 Cdc14a Gaba_1	1607 SCH Six6 Cdc14a Gaba_1	#FF3358	#FF6600	#FFBC4D	#00FF8D	#CC5CCC	094 SCH | Vip core
1019171907101720130-2	SCN	13592.4	6582	1019171907101720130-2	C57BL6J-638850.43	1430	0.728008	C57BL6J-638850	C57BL6J-638850	wt/wt	M	5.59434	8.20368	7.8	GABA	12 HY GABA	094 SCH Six6 Cdc14a Gaba	0436 SCH Six6 Cdc14a Gaba_1	1607 SCH Six6 Cdc14a Gaba_1	#FF3358	#FF6600	#FFBC4D	#00FF8D	#CC5CCC	094 SCH | Avp shell
1019171907101550449-1	SCN	14724.8	7306	1019171907101550449-1	C57BL6J-638850.43	1430	0.541124	C57BL6J-638850	C57BL6J-638850	wt/wt	M	5.27529	8.19904	7.8	GABA	12 HY GABA	094 SCH Six6 Cdc14a Gaba	0436 SCH Six6 Cdc14a Gaba_1	1607 SCH Six6 Cdc14a Gaba_1	#FF3358	#FF6600	#FFBC4D	#00FF8D	#CC5CCC	094 SCH | Cck/C1ql3
1019171907101720296-2	SCN	13963.6	6654	1019171907101720296-2	C57BL6J-638850.43	1430	0.796053	C57BL6J-638850	C57BL6J-638850	wt/wt	M	5.64684	8.0893	7.8	GABA	12 HY GABA	094 SCH Six6 Cdc14a Gaba	0436 SCH Six6 Cdc14a Gaba_1	1607 SCH Six6 Cdc14a Gaba_1	#FF3358	#FF6600	#FFBC4D	#00FF8D	#CC5CCC	094 SCH | Avp shell
[truncated: 1,231 more rows]

## Sheet: SCN reference cell type annotat
cell_id	cell_type
1.01917e+18	334 Microglia NN
1.01917e+18	334 Microglia NN
1.01917e+18	334 Microglia NN
1.01917e+18	334 Microglia NN
1.01917e+18	334 Microglia NN
1.01917e+18	334 Microglia NN
[truncated: 2,000 more rows]
