# Supplementary material
Source: Research Square preprint supplement (doi:10.21203/rs.3.rs-8738572/v1)
Supplement: Supplementary file 8 [file f03f76d7eb21c89495896753.xlsx]

## Sheet: Legends
Abbreviation	Description
log2FC	Log 2 Fold change
SE	Standard Error
DF	Degrees of Freedom
pvalue	Standard p-value
pvalueBH	Adjusted p-value using the Benjamini-Hochberg (BH)
WT_Cortex	Samples from Wild Type Cortex punches
KI_Cortex	Samples from SIK1 Knock-in Cortex punches
Enrichment	Mean Log2 fold change of a given kinases substrates divided by mean Log2 fold-change of substrates for all kinases
m	Number of substrates for each kinase
Z-score	The weighted and standard deviation-normalised score for each kinase

## Sheet: Sheet Description
Sheet	Description
Cortex PHospho(SY) Sites	Raw data and phosphosite intensities of Cortex
Cortex stats	Statistical analysis of Cortex phosphoproteomics (SIK1 KI vs WT)
SIK1 Overlap Wang Bruning	Phoshosite overlap between sites detected in SIK1 KI Cortex and those published in Bruning et al and Wang et al
Sik1_Cortex_phosphoprot_GO	Functional analysis by GO profiler
KSEA Cortex	Kinase Substrate Enrichment Analaysis for Cortex SIK1 KI vs Wildtype as per Wiredja et al using cut off of m >4 substrates assigned per kinase

## Sheet: Cortex Phospho (SY) sites
Proteins	Positions within proteins	Leading proteins	Protein	Protein names	Gene names	Fasta headers	Localization prob	Score diff	PEP	Score	Delta score	Score for localization	Localization prob Cortex	Score diff Cortex	PEP Cortex	Score Cortex	Localization prob SCN	Score diff SCN	PEP SCN	Score SCN	Diagnostic peak	Number of Phospho (ST)	Amino acid	Sequence window	WT_Cortex	KI_Cortex	WT_Cortex	KI_Cortex	WT_Cortex	KI_Cortex	WT_Cortex	KI_Cortex
A0A087WRI3	173	A0A087WRI3	A0A087WRI3		1700101E01Rik	tr|A0A087WRI3|A0A087WRI3_MOUSE Cilia and flagella associated protein 77 OS=Mus musculus OX=10090 GN=Cfap77 PE=1 SV=1	0.499632	0	0.00141509	48.759	19.413	48.759					0.499632	0	0.00141509	48.759			S	KEPPPIPPNMTFGIRSRPSTPFFDLLQHRYQ	0	0	0	0	0	0	0	0
A0A087WRI3	176	A0A087WRI3	A0A087WRI3		1700101E01Rik	tr|A0A087WRI3|A0A087WRI3_MOUSE Cilia and flagella associated protein 77 OS=Mus musculus OX=10090 GN=Cfap77 PE=1 SV=1	0.333333	0	0.00893698	43.297	32.036	43.297					0.333333	0	0.00893698	43.297			S	PPIPPNMTFGIRSRPSTPFFDLLQHRYQQLW	0	0	0	0	0	0	0	0
A0A0A6YW67;P62984;P62983;P0CG49;P0CG50	65;65;65;65;65	A0A0A6YW67	A0A0A6YW67	Ubiquitin-60S ribosomal protein L40;Ubiquitin;60S ribosomal protein L40;Ubiquitin-40S ribosomal protein S27a;Ubiquitin;40S ribosomal protein S27a;Polyubiquitin-B;Ubiquitin;Polyubiquitin-C;Ubiquitin;Ubiquitin-related 1;Ubiquitin-related 2	Gm8797;Uba52;Rps27a;Ubb;Ubc	tr|A0A0A6YW67|A0A0A6YW67_MOUSE Predicted pseudogene 8797 OS=Mus musculus OX=10090 GN=Gm8797 PE=4 SV=1;sp|P62984|RL40_MOUSE Ubiquitin-ribosomal protein eL40 fusion protein OS=Mus musculus OX=10090 GN=Uba52 PE=1 SV=2;sp|P62983|RS27A_MOUSE Ubiquitin-ribosomal	0.5	0	0.00195061	74.162	51.422	74.162					0.5	0	0.00195061	74.162		1	S	LEDGRTLSDYNIQKESTLHLVLRLRGGY___	0	0	0	0	0	0	0	0
A0A0A6YW67;P62984;P62983;P0CG49;P0CG50	57;57;57;57;57	A0A0A6YW67	A0A0A6YW67	Ubiquitin-60S ribosomal protein L40;Ubiquitin;60S ribosomal protein L40;Ubiquitin-40S ribosomal protein S27a;Ubiquitin;40S ribosomal protein S27a;Polyubiquitin-B;Ubiquitin;Polyubiquitin-C;Ubiquitin;Ubiquitin-related 1;Ubiquitin-related 2	Gm8797;Uba52;Rps27a;Ubb;Ubc	tr|A0A0A6YW67|A0A0A6YW67_MOUSE Predicted pseudogene 8797 OS=Mus musculus OX=10090 GN=Gm8797 PE=4 SV=1;sp|P62984|RL40_MOUSE Ubiquitin-ribosomal protein eL40 fusion protein OS=Mus musculus OX=10090 GN=Uba52 PE=1 SV=2;sp|P62983|RS27A_MOUSE Ubiquitin-ribosomal	0.998663	28.7324	2.1e-15	136.04	111.15	128.01	0.998663	28.7324	1.83e-05	128.01	0.970161	15.1205	2.1e-15	136.04		1	S	RLIFAGKQLEDGRTLSDYNIQKESTLHLVLR	7219.1	11532	3385.2	8875.5	6133.6	7001.2	6924.8	8221.8
A0A140LIW3	1450	A0A140LIW3	A0A140LIW3			tr|A0A140LIW3|A0A140LIW3_MOUSE FERM and PDZ domain containing 3 OS=Mus musculus OX=10090 GN=Frmpd3 PE=1 SV=1	0.826873	6.796	0.000121724	61.524	52.701	61.524	0.819362	7.27693	0.00440261	40.962	0.826873	6.796	0.000121724	61.524		1	S	SGFPVGLGPKSKCAESPTLGEPSYVQVAPES	268.73	669.32	334.35	307.97	368.93	209.88	121.7	297.63
A0A140LIW3	1457	A0A140LIW3	A0A140LIW3			tr|A0A140LIW3|A0A140LIW3_MOUSE FERM and PDZ domain containing 3 OS=Mus musculus OX=10090 GN=Frmpd3 PE=1 SV=1	0.893416	10.1259	0.000169048	64.65	52.29	64.65					0.893416	10.1259	0.000169048	64.65		1	S	GPKSKCAESPTLGEPSYVQVAPESKGPRQMA	0	0	0	0	0	0	0	0
A0A140LIW3	509	A0A140LIW3	A0A140LIW3			tr|A0A140LIW3|A0A140LIW3_MOUSE FERM and PDZ domain containing 3 OS=Mus musculus OX=10090 GN=Frmpd3 PE=1 SV=1	0.997832	26.6315	2.7e-46	201.09	154.74	201.09	0.996123	24.1018	3.55e-11	122.13	0.997832	26.6315	2.7e-46	201.09		1	S	HLGKKESSYVGSVGTSPRKSSRCTTPPADSE	519.39	1277.6	835.34	799.36	906.07	926.13	515.52	1056.4
A0A140LIW3	1347	A0A140LIW3	A0A140LIW3			tr|A0A140LIW3|A0A140LIW3_MOUSE FERM and PDZ domain containing 3 OS=Mus musculus OX=10090 GN=Frmpd3 PE=1 SV=1	0.575866	1.32818	5.99e-05	76.027	56.952	76.027	0.5	0	0.000732284	58.09	0.575866	1.32818	5.99e-05	76.027		1	S	RVPPTQRQPEAGPGLSLNSPINVQRIRSTSL	392.34	760.25	217.73	194.32	363.84	354.16	201.01	539
A0A140LIW3	1350	A0A140LIW3	A0A140LIW3			tr|A0A140LIW3|A0A140LIW3_MOUSE FERM and PDZ domain containing 3 OS=Mus musculus OX=10090 GN=Frmpd3 PE=1 SV=1	0.992267	21.0828	1.22e-15	143.83	110.62	143.83	0.5	0	0.000732284	58.09	0.992267	21.0828	1.22e-15	143.83		1	S	PTQRQPEAGPGLSLNSPINVQRIRSTSLESR	392.34	760.25	217.73	194.32	363.84	354.16	201.01	539
A0A140LIW3	1178	A0A140LIW3	A0A140LIW3			tr|A0A140LIW3|A0A140LIW3_MOUSE FERM and PDZ domain containing 3 OS=Mus musculus OX=10090 GN=Frmpd3 PE=1 SV=1	0.768107	5.23201	0.00156331	62.104	47.131	62.104					0.768107	5.23201	0.00156331	62.104		1	S	SQSRGQSPSCQPRSQSPLRPLATSRQVSTMP	0	0	0	0	0	0	0	0
A0A1D5RLD8;P16858;S4R1W1	208;208;208	A0A1D5RLD8	A0A1D5RLD8	Glyceraldehyde-3-phosphate dehydrogenase	Gapdh;Gm3839	tr|A0A1D5RLD8|A0A1D5RLD8_MOUSE Glyceraldehyde-3-phosphate dehydrogenase OS=Mus musculus OX=10090 GN=Gapdhrt2 PE=1 SV=1;sp|P16858|G3P_MOUSE Glyceraldehyde-3-phosphate dehydrogenase OS=Mus musculus OX=10090 GN=Gapdh PE=1 SV=2;tr|S4R1W1|S4R1W1_MOUSE Glycerald	0.5	0	0.000376548	68.034	44.047	68.034	0.5	0	0.000376548	68.034						1	S	LWRDGRGAAQNIIPASTGAAKAVGKVIPELN	351.94	349.07	493.02	540.54	336.05	359.13	283.84	254.06
A0A1D5RLD8;P16858;S4R1W1	264;264;264	A0A1D5RLD8	A0A1D5RLD8	Glyceraldehyde-3-phosphate dehydrogenase	Gapdh;Gm3839	tr|A0A1D5RLD8|A0A1D5RLD8_MOUSE Glyceraldehyde-3-phosphate dehydrogenase OS=Mus musculus OX=10090 GN=Gapdhrt2 PE=1 SV=1;sp|P16858|G3P_MOUSE Glyceraldehyde-3-phosphate dehydrogenase OS=Mus musculus OX=10090 GN=Gapdh PE=1 SV=2;tr|S4R1W1|S4R1W1_MOUSE Glycerald	1	42.0009	0.0544539	42.001	24.565	42.001	1	42.0009	0.0544539	42.001						1	S	KPAKYDDIKKVVKQASEGPLKGILGYTEDQV	979.87	1461.8	652.76	1634.1	1094.7	1420.4	1955.2	1053.9
A0A1Y7VLQ2	95	A0A1Y7VLQ2	A0A1Y7VLQ2			tr|A0A1Y7VLQ2|A0A1Y7VLQ2_MOUSE Predicted gene 42517 OS=Mus musculus OX=10090 GN=Tmem217rt PE=1 SV=1	1	72.084	8.13e-07	117	102.3	98.062	1	72.084	5.42e-05	101.42	0.999999	58.9166	8.13e-07	117		1;2	S	AGSGAGPGPGLRVPASPAGAPEPSPGETRAA	1348.4	1906.5	1517.9	1429.4	1269.7	1430.6	1090.2	1155.3
A0A1Y7VLQ2	103	A0A1Y7VLQ2	A0A1Y7VLQ2			tr|A0A1Y7VLQ2|A0A1Y7VLQ2_MOUSE Predicted gene 42517 OS=Mus musculus OX=10090 GN=Tmem217rt PE=1 SV=1	0.999565	33.6211	1.88e-06	110.84	96.424	110.84	0.999565	33.6211	1.88e-06	110.84						1;2	S	PGLRVPASPAGAPEPSPGETRAAAGPSGPVN	646.58	978.92	749.89	785.92	673.69	616.46	636.39	566.37
A0A286YCX6	657	A0A286YCX6	A0A286YCX6			tr|A0A286YCX6|A0A286YCX6_MOUSE Trafficking protein particle complex 8 OS=Mus musculus OX=10090 GN=Trappc8 PE=1 SV=2	0.999993	56.3666	8.73e-07	66.083	61.599	66.083					0.999993	56.3666	8.73e-07	66.083		1	S	FLREYLYVYKNVNQLSPDGPLPQLPLPYINS	0	0	0	0	0	0	0	0
A0A2I3BRL8;Q91VM5;Q9WV02	205;205;208	A0A2I3BRL8	A0A2I3BRL8	RNA binding motif protein
A0A2I3BRL8;Q91VM5	246;246	A0A2I3BRL8	A0A2I3BRL8	RNA binding motif protein
A0A2I3BRL8;Q91VM5	247;247	A0A2I3BRL8	A0A2I3BRL8	RNA binding motif protein
A0A2I3BRL8;Q91VM5	248;248	A0A2I3BRL8	A0A2I3BRL8	RNA binding motif protein
A0A2I3BRL8;Q91VM5;Q9WV02	88;88;88	A0A2I3BRL8	A0A2I3BRL8	RNA binding motif protein
A0A2I3BRN2	15	A0A2I3BRN2	A0A2I3BRN2			tr|A0A2I3BRN2|A0A2I3BRN2_MOUSE G protein regulated inducer of neurite outgrowth 2 OS=Mus musculus OX=10090 GN=Gprin2 PE=1 SV=1	0.99883	31.1005	0.000178444	50.499	38.185	50.499					0.99883	31.1005	0.000178444	50.499		1	S	_MSSSHPEPGAREPQSPRPQALSQSSSSLLC	0	0	0	0	0	0	0	0
A0A2R8VKG2	1789	A0A2R8VKG2	A0A2R8VKG2			tr|A0A2R8VKG2|A0A2R8VKG2_MOUSE RIKEN cDNA D430041D05 gene OS=Mus musculus OX=10090 GN=D430041D05Rik PE=1 SV=1	0.283603	0	0.0141346	44.299	30.393	44.299	0.283603	0	0.0141346	44.299							S	RGYGRARQAKGHSETSTLSSQPSIDEVRQQM	0	0	0	0	0	0	0	0
A0A2R8VKG2	1792	A0A2R8VKG2	A0A2R8VKG2			tr|A0A2R8VKG2|A0A2R8VKG2_MOUSE RIKEN cDNA D430041D05 gene OS=Mus musculus OX=10090 GN=D430041D05Rik PE=1 SV=1	0.231101	0	0.000918069	56.225	37.15	56.225	0.231101	0	0.000918069	56.225							S	GRARQAKGHSETSTLSSQPSIDEVRQQMHML	0	0	0	0	0	0	0	0
A0A2R8VKG2	1793	A0A2R8VKG2	A0A2R8VKG2			tr|A0A2R8VKG2|A0A2R8VKG2_MOUSE RIKEN cDNA D430041D05 gene OS=Mus musculus OX=10090 GN=D430041D05Rik PE=1 SV=1	0.809417	6.63046	3.29e-06	103.9	85.306	103.9	0.809417	6.63046	3.29e-06	103.9						1	S	RARQAKGHSETSTLSSQPSIDEVRQQMHMLL	589.05	976.53	790.59	341	740.42	793.94	404.46	588.56
A0A2R8VKG2	1584	A0A2R8VKG2	A0A2R8VKG2			tr|A0A2R8VKG2|A0A2R8VKG2_MOUSE RIKEN cDNA D430041D05 gene OS=Mus musculus OX=10090 GN=D430041D05Rik PE=1 SV=1	0.999931	41.626	8.8e-199	292.75	263.74	292.75	0.999931	41.626	8.8e-199	292.75	0.99944	32.5136	4.43e-23	149.44		1	S	QKVTKEESRKRNVTASDEEEGAGLFDSAGKA	10372	14915	12039	9835.1	13234	11766	10582	12638
A0A2R8VKG2	1729	A0A2R8VKG2	A0A2R8VKG2			tr|A0A2R8VKG2|A0A2R8VKG2_MOUSE RIKEN cDNA D430041D05 gene OS=Mus musculus OX=10090 GN=D430041D05Rik PE=1 SV=1	0.901289	10.102	0.000302711	61.648	50.378	61.648	0.901289	10.102	0.000302711	61.648	0.853613	8.17785	0.00371892	40.669		1	S	QQMKNSVYRSRQSLNSPSPGETEMDLLVTRE	420.76	935.51	602.58	342.67	553.7	626.16	454.5	463.1
A0A2R8VKG2	1731	A0A2R8VKG2	A0A2R8VKG2			tr|A0A2R8VKG2|A0A2R8VKG2_MOUSE RIKEN cDNA D430041D05 gene OS=Mus musculus OX=10090 GN=D430041D05Rik PE=1 SV=1	0.709171	4.91891	0.000875735	54.524	37.446	54.524					0.709171	4.91891	0.000875735	54.524		1	S	MKNSVYRSRQSLNSPSPGETEMDLLVTRERP	0	0	0	0	0	0	0	0
A0A2R8VKG2	2025	A0A2R8VKG2	A0A2R8VKG2			tr|A0A2R8VKG2|A0A2R8VKG2_MOUSE RIKEN cDNA D430041D05 gene OS=Mus musculus OX=10090 GN=D430041D05Rik PE=1 SV=1	0.835939	7.63771	4.71e-09	116.81	84.289	63.76	0.835939	7.63771	4.71e-09	116.81	0.526996	2.48795	0.0274552	56.493		1	S	PGYIEAYPRSRYQQSSPSRLPRQYSQPANLH	9664	11037	9068.2	15026	2026.4	8470.8	4610.7	9106.6
A0A2R8VKG2	2027	A0A2R8VKG2	A0A2R8VKG2			tr|A0A2R8VKG2|A0A2R8VKG2_MOUSE RIKEN cDNA D430041D05 gene OS=Mus musculus OX=10090 GN=D430041D05Rik PE=1 SV=1	0.960695	16.8917	0.000928648	91.853	69.722	91.853	0.960695	16.8917	0.000928648	91.853						1	S	YIEAYPRSRYQQSSPSRLPRQYSQPANLHPS	3373.7	5274.1	3532.5	6457.9	676.3	3907.7	1796.6	4561.2
A0A3Q4EGK1	386	A0A3Q4EGK1	A0A3Q4EGK1			tr|A0A3Q4EGK1|A0A3Q4EGK1_MOUSE Predicted gene
A0A571BF63	1213	A0A571BF63	A0A571BF63			sp|A0A571BF63|ANKF1_MOUSE Ankyrin-repeat and fibronectin type III domain-containing 1 OS=Mus musculus OX=10090 GN=Ankfn1 PE=1 SV=1	1	50.305	1.82e-41	190.11	166.97	50.305	1	50.305	0.000115675	93.909	1	172.573	1.82e-41	190.11		1	S	PVVDGPRGLPLAHAASLPEERRSCLQDPRRP	1271.9	707.24	614.46	646.92	812.43	374.5	592.04	340.35
A0A571BF63	251	A0A571BF63	A0A571BF63			sp|A0A571BF63|ANKF1_MOUSE Ankyrin-repeat and fibronectin type III domain-containing 1 OS=Mus musculus OX=10090 GN=Ankfn1 PE=1 SV=1	0.955081	13.3078	0.000572564	74.475	64.895	74.475					0.955081	13.3078	0.000572564	74.475		1	S	RLYRNLSEKLKGSHSSFDEAYFRTRTDRLSL	0	0	0	0	0	0	0	0
A0A571BG01	264	A0A571BG01	A0A571BG01			tr|A0A571BG01|A0A571BG01_MOUSE Death domain containing 1 OS=Mus musculus OX=10090 GN=Dthd1 PE=4 SV=1	0.466474	0	0.00266512	71.548	49.789	71.548					0.466474	0	0.00266512	71.548			S	EIQETSKSQREKITTSPTAWDVSSKDMNNLY	0	0	0	0	0	0	0	0
A0A5F8MPH2	108	A0A5F8MPH2	A0A5F8MPH2			tr|A0A5F8MPH2|A0A5F8MPH2_MOUSE CUGBP
A0A5F8MPI9	329	A0A5F8MPI9	A0A5F8MPI9			tr|A0A5F8MPI9|A0A5F8MPI9_MOUSE Rap guanine nucleotide exchange factor (GEF) 1 OS=Mus musculus OX=10090 GN=Rapgef1 PE=1 SV=1	0.558486	1.27996	0.000315817	89.301	72.36	89.301					0.558486	1.27996	0.000315817	89.301		1	S	TRVAVVAPMSRATSGSSLPVGINRQDFDVEC	0	0	0	0	0	0	0	0
A0A5F8MPI9	374	A0A5F8MPI9	A0A5F8MPI9			tr|A0A5F8MPI9|A0A5F8MPI9_MOUSE Rap guanine nucleotide exchange factor (GEF) 1 OS=Mus musculus OX=10090 GN=Rapgef1 PE=1 SV=1	0.527607	0.484357	0.00931884	43.297	24.702	43.297					0.527607	0.484357	0.00931884	43.297		1	S	GESPRLSPCSSTGKLSRSDEQLSSLDRDSGQ	0	0	0	0	0	0	0	0
A0A5F8MPI9	268	A0A5F8MPI9	A0A5F8MPI9			tr|A0A5F8MPI9|A0A5F8MPI9_MOUSE Rap guanine nucleotide exchange factor (GEF) 1 OS=Mus musculus OX=10090 GN=Rapgef1 PE=1 SV=1	0.434113	0	0.000328652	42.241	36.4	42.241					0.434113	0	0.000328652	42.241			S	LTDREMEILNKTTSVSPSAELLPDSTSEEVA	0	0	0	0	0	0	0	0
A0A5F8MPI9	270	A0A5F8MPI9	A0A5F8MPI9			tr|A0A5F8MPI9|A0A5F8MPI9_MOUSE Rap guanine nucleotide exchange factor (GEF) 1 OS=Mus musculus OX=10090 GN=Rapgef1 PE=1 SV=1	0.434113	0	0.000328652	42.241	36.4	42.241					0.434113	0	0.000328652	42.241			S	DREMEILNKTTSVSPSAELLPDSTSEEVAPP	0	0	0	0	0	0	0	0
A0A5F8MPI9	298	A0A5F8MPI9	A0A5F8MPI9			tr|A0A5F8MPI9|A0A5F8MPI9_MOUSE Rap guanine nucleotide exchange factor (GEF) 1 OS=Mus musculus OX=10090 GN=Rapgef1 PE=1 SV=1	1	51.841	0.00804783	51.841	26.986	51.841					1	51.841	0.00804783	51.841		1	S	APPKPPLPGIRVVDNSPPALPPKKRQSAPSP	0	0	0	0	0	0	0	0
A0A8I4SYN6;P84244;P84228;P68433;P02301	58;58;58;58;58	A0A8I4SYN6	A0A8I4SYN6	Histone H3.3;Histone H3.2;Histone H3.1;Histone H3.3C	H3f3a;Hist1h3b;Hist1h3a;H3f3c	tr|A0A8I4SYN6|A0A8I4SYN6_MOUSE Histone H3 OS=Mus musculus OX=10090 GN=H3f4 PE=3 SV=1;sp|P84244|H33_MOUSE Histone H3.3 OS=Mus musculus OX=10090 GN=H3-3b PE=1 SV=2;sp|P84228|H32_MOUSE Histone H3.2 OS=Mus musculus OX=10090 GN=H3c15 PE=1 SV=2;sp|P68433|H31_MOU	0.679109	3.25582	5.7e-07	134.48	69.911	134.48	0.5	0	0.000532041	114.28	0.679109	3.25582	5.7e-07	134.48		1	S	HPGTVALREIRRYQKSTELLIRKLPFQRLVR	342.41	830.66	157.24	711.71	381.49	633.86	360.23	763.83
A0JP43	626	A0JP43	A0JP43	EF-hand calcium-binding domain-containing protein 5	Efcab5	sp|A0JP43|EFCB5_MOUSE EF-hand calcium-binding domain-containing protein 5 OS=Mus musculus OX=10090 GN=Efcab5 PE=1 SV=2	1	57.3483	0.056273	57.348	10.886	57.348	1	57.3483	0.056273	57.348	1	57.3483	0.056273	57.348		2	S	SKQPEVPTSSKKERPSGSPKKGRLSGTSKRD	0	0	0	0	0	0	0	0
A0JP43	628	A0JP43	A0JP43	EF-hand calcium-binding domain-containing protein 5	Efcab5	sp|A0JP43|EFCB5_MOUSE EF-hand calcium-binding domain-containing protein 5 OS=Mus musculus OX=10090 GN=Efcab5 PE=1 SV=2	1	57.3483	0.056273	57.348	10.886	57.348	1	57.3483	0.056273	57.348	1	57.3483	0.056273	57.348		2	S	QPEVPTSSKKERPSGSPKKGRLSGTSKRDSQ	0	0	0	0	0	0	0	0
A1A5B6	560	A1A5B6	A1A5B6	TBC1 domain family member 25	Tbc1d25	sp|A1A5B6|TBC25_MOUSE TBC1 domain family member 25 OS=Mus musculus OX=10090 GN=Tbc1d25 PE=1 SV=1	1	142.768	7.38e-15	157.22	128.32	142.77	1	142.768	1.41e-10	142.77	1	157.225	7.38e-15	157.22		1	S	SSQGPSGGGRLLRQASLDGLQQLRDNMGLRK	4597.6	5272.5	3857.9	4629.7	3756.2	5476.3	3020.1	4407.4
A1L3P4	700	A1L3P4	A1L3P4	Sodium/hydrogen exchanger	Slc9a6	sp|A1L3P4|SL9A6_MOUSE Sodium/hydrogen exchanger 6 OS=Mus musculus OX=10090 GN=Slc9a6 PE=1 SV=1	0.809595	6.57459	3.59e-06	70.761	62.371	62.1	0.809595	6.57459	6.29e-06	62.1	0.736732	4.47966	3.59e-06	70.761		1	S	DDSEPALNSLDDTRHSPA_____________	0	0	0	173.21	0	0	0	146.39
A2A432	192	A2A432	A2A432	Cullin-4B	Cul4b	sp|A2A432|CUL4B_MOUSE Cullin-4B OS=Mus musculus OX=10090 GN=Cul4b PE=1 SV=1	0.103125	0	1.16e-05	57.61	43.879	57.61	0.103125	0	1.16e-05	57.61							S	DTLEFVGIDTKMAEESSSSSSSSSPTAATSQ	0	0	0	0	0	0	0	0
A2A432	193	A2A432	A2A432	Cullin-4B	Cul4b	sp|A2A432|CUL4B_MOUSE Cullin-4B OS=Mus musculus OX=10090 GN=Cul4b PE=1 SV=1	0.103125	0	1.16e-05	57.61	43.879	57.61	0.103125	0	1.16e-05	57.61							S	TLEFVGIDTKMAEESSSSSSSSSPTAATSQQ	0	0	0	0	0	0	0	0
A2A432	194	A2A432	A2A432	Cullin-4B	Cul4b	sp|A2A432|CUL4B_MOUSE Cullin-4B OS=Mus musculus OX=10090 GN=Cul4b PE=1 SV=1	0.103125	0	1.16e-05	57.61	43.879	57.61	0.103125	0	1.16e-05	57.61							S	LEFVGIDTKMAEESSSSSSSSSPTAATSQQQ	0	0	0	0	0	0	0	0
A2A432	195	A2A432	A2A432	Cullin-4B	Cul4b	sp|A2A432|CUL4B_MOUSE Cullin-4B OS=Mus musculus OX=10090 GN=Cul4b PE=1 SV=1	0.103125	0	1.16e-05	57.61	43.879	57.61	0.103125	0	1.16e-05	57.61							S	EFVGIDTKMAEESSSSSSSSSPTAATSQQQQ	0	0	0	0	0	0	0	0
A2A432	196	A2A432	A2A432	Cullin-4B	Cul4b	sp|A2A432|CUL4B_MOUSE Cullin-4B OS=Mus musculus OX=10090 GN=Cul4b PE=1 SV=1	0.103125	0	1.16e-05	57.61	43.879	57.61	0.103125	0	1.16e-05	57.61							S	FVGIDTKMAEESSSSSSSSSPTAATSQQQQQ	0	0	0	0	0	0	0	0
A2A432	199	A2A432	A2A432	Cullin-4B	Cul4b	sp|A2A432|CUL4B_MOUSE Cullin-4B OS=Mus musculus OX=10090 GN=Cul4b PE=1 SV=1	0.323817	0	7.53e-23	132.72	118.99	132.72					0.323817	0	7.53e-23	132.72			S	IDTKMAEESSSSSSSSSPTAATSQQQQQQQL	0	0	0	0	0	0	0	0
A2A432	200	A2A432	A2A432	Cullin-4B	Cul4b	sp|A2A432|CUL4B_MOUSE Cullin-4B OS=Mus musculus OX=10090 GN=Cul4b PE=1 SV=1	0.441053	0	7.53e-23	132.72	118.99	107.9					0.441053	0	7.53e-23	132.72			S	DTKMAEESSSSSSSSSPTAATSQQQQQQQLK	0	0	0	0	0	0	0	0
A2A472	363	A2A472	A2A472		Tox2	tr|A2A472|A2A472_MOUSE TOX high mobility group box family member 2 OS=Mus musculus OX=10090 GN=Tox2 PE=1 SV=1	0.88866	9.03804	0.000239618	83.213	56.184	64.439					0.88866	9.03804	0.000239618	83.213		1	S	YLKALAAYRASLVSKSPPDQGEAKNTQANPP	0	0	0	0	0	0	0	0
A2A472	248	A2A472	A2A472		Tox2	tr|A2A472|A2A472_MOUSE TOX high mobility group box family member 2 OS=Mus musculus OX=10090 GN=Tox2 PE=1 SV=1	0.339395	0	7.81e-06	82.877	68.568	82.877					0.339395	0	7.81e-06	82.877			S	PSPPGSKSATPSPSSSTQEEESDAHFKISGE	0	0	0	0	0	0	0	0
A2A472	232	A2A472	A2A472		Tox2	tr|A2A472|A2A472_MOUSE TOX high mobility group box family member 2 OS=Mus musculus OX=10090 GN=Tox2 PE=1 SV=1	0.499526	0	0.000183353	95.264	79.011	95.264					0.499526	0	0.000183353	95.264			S	QLISQMGIRSGIAHGSPSPPGSKSATPSPSS	0	0	0	0	0	0	0	0
A2A472	234	A2A472	A2A472		Tox2	tr|A2A472|A2A472_MOUSE TOX high mobility group box family member 2 OS=Mus musculus OX=10090 GN=Tox2 PE=1 SV=1	0.499526	0	0.000183353	95.264	79.011	95.264					0.499526	0	0.000183353	95.264			S	ISQMGIRSGIAHGSPSPPGSKSATPSPSSST	0	0	0	0	0	0	0	0
A2A484	410	A2A484	A2A484		Zmynd8	tr|A2A484|A2A484_MOUSE Zinc finger
A2A484	763	A2A484	A2A484		Zmynd8	tr|A2A484|A2A484_MOUSE Zinc finger
A2A484	28	A2A484	A2A484		Zmynd8	tr|A2A484|A2A484_MOUSE Zinc finger
A2A484	658	A2A484	A2A484		Zmynd8	tr|A2A484|A2A484_MOUSE Zinc finger
A2A484	661	A2A484	A2A484		Zmynd8	tr|A2A484|A2A484_MOUSE Zinc finger
A2A5R2	1535	A2A5R2	A2A5R2	Brefeldin A-inhibited guanine nucleotide-exchange protein 2	Arfgef2	sp|A2A5R2|BIG2_MOUSE Brefeldin A-inhibited guanine nucleotide-exchange protein 2 OS=Mus musculus OX=10090 GN=Arfgef2 PE=1 SV=1	0.705855	4.04042	5.39e-27	164.88	131.68	164.88	0.705517	3.79518	1.99e-10	123.76	0.705855	4.04042	5.39e-27	164.88		1	S	SSIDRNASERGQSQLSNPTDDSWKGAPYAHQ	1996.6	2731.8	1353.1	2277.6	1026.4	1575	663.95	1390.1
A2A5R2	218	A2A5R2	A2A5R2	Brefeldin A-inhibited guanine nucleotide-exchange protein 2	Arfgef2	sp|A2A5R2|BIG2_MOUSE Brefeldin A-inhibited guanine nucleotide-exchange protein 2 OS=Mus musculus OX=10090 GN=Arfgef2 PE=1 SV=1	1	66.7734	8.8e-10	131.45	110.55	131.45	0.938742	14.1971	0.00516932	47.745	1	66.7734	8.8e-10	131.45		2	S	QEARELEKPMQSKPQSPVIQATAGSPKFSRL	0	0	0	0	0	0	0	0
A2A5R2	227	A2A5R2	A2A5R2	Brefeldin A-inhibited guanine nucleotide-exchange protein 2	Arfgef2	sp|A2A5R2|BIG2_MOUSE Brefeldin A-inhibited guanine nucleotide-exchange protein 2 OS=Mus musculus OX=10090 GN=Arfgef2 PE=1 SV=1	0.999783	36.6276	1.24e-26	159.22	125.33	130.72	0.999783	36.6276	5.79e-11	130.72	0.998983	29.9204	1.24e-26	159.22		1;2	S	MQSKPQSPVIQATAGSPKFSRLKQSQAQSKP	1505.3	2496.6	318.5	1488.7	1339.8	1264.5	2487	1592.4
A2A5R2	356	A2A5R2	A2A5R2	Brefeldin A-inhibited guanine nucleotide-exchange protein 2	Arfgef2	sp|A2A5R2|BIG2_MOUSE Brefeldin A-inhibited guanine nucleotide-exchange protein 2 OS=Mus musculus OX=10090 GN=Arfgef2 PE=1 SV=1	0.851755	7.71545	3.06e-23	149.07	128.05	149.07	0.851755	7.71545	3.06e-23	149.07	0.841322	7.25574	3.26e-23	148.53		1	S	NSQTNGIADDRQSLSSADNLEPDVQGHQVAA	351.82	1048.3	538.71	534.08	819.79	414.89	593.11	670.35
A2A5R2	621	A2A5R2	A2A5R2	Brefeldin A-inhibited guanine nucleotide-exchange protein 2	Arfgef2	sp|A2A5R2|BIG2_MOUSE Brefeldin A-inhibited guanine nucleotide-exchange protein 2 OS=Mus musculus OX=10090 GN=Arfgef2 PE=1 SV=1	0.351392	1.67341	1.22e-08	66.828	55.825	66.828					0.351392	1.67341	1.22e-08	66.828			S	QEMGDGKGLDMARRCSVTSVESTVSSGTQTA	0	0	0	0	0	0	0	0
A2A654	1315	A2A654	A2A654		Bptf	tr|A2A654|A2A654_MOUSE Bromodomain PHD finger transcription factor OS=Mus musculus OX=10090 GN=Bptf PE=1 SV=1	0.974322	15.7914	3.1e-43	193.81	158.27	193.15	0.974322	15.7914	3.28e-43	193.15	0.793387	5.84328	3.1e-43	193.81		1	S	IQSPGPNCQRQNSVESDLDARISEPAGKGLE	2724.5	4173.2	2604.5	2416.5	2236.8	2313.8	1958.3	2739.4
A2A654	228	A2A654	A2A654		Bptf	tr|A2A654|A2A654_MOUSE Bromodomain PHD finger transcription factor OS=Mus musculus OX=10090 GN=Bptf PE=1 SV=1	1	49.4818	0.00804165	68.016	28.868	49.482	1	46.8912	0.0519244	46.891	1	49.4818	0.00804165	68.016		1	S	SSTPGRRKPRVHRPRSPILEEKDIPPLEFPK	414.45	1166.3	189.58	379.71	1233.8	341.99	448.44	865.56
A2A654	1674	A2A654	A2A654		Bptf	tr|A2A654|A2A654_MOUSE Bromodomain PHD finger transcription factor OS=Mus musculus OX=10090 GN=Bptf PE=1 SV=1	1	49.0967	0.0449905	49.097	16.742	49.097					1	49.0967	0.0449905	49.097		1	S	EDMETESPEVKRVIPSPVRTGEGSNLSKGFM	0	0	0	0	0	0	0	0
A2A690	1549	A2A690	A2A690	Protein TANC2	Tanc2	sp|A2A690|TANC2_MOUSE Protein TANC2 OS=Mus musculus OX=10090 GN=Tanc2 PE=1 SV=1	0.996263	24.8365	0.00691195	56.551	33.672	52.579	0.996263	24.8365	0.0071822	56.087	0.946826	13.6864	0.00691195	56.551		1	S	SPPPSPLRRGPQYRASPPAESMSVYRSQSGS	1677.7	2927.2	1778.8	1397.1	2059.7	1650.3	1791	1928.3
A2A690	169	A2A690	A2A690	Protein TANC2	Tanc2	sp|A2A690|TANC2_MOUSE Protein TANC2 OS=Mus musculus OX=10090 GN=Tanc2 PE=1 SV=1	0.851742	8.21818	1.1e-148	268.18	248.51	148.7	0.851742	8.21818	1.09e-21	148.7	0.485658	0	1.1e-148	268.18		1	S	STNAAAKDCSYGAVTSPTSTLESRDSGIIAT	4824.5	9878.1	3781.3	6104.2	4109.9	4689.8	3068	5255.4
A2A690	1461	A2A690	A2A690	Protein TANC2	Tanc2	sp|A2A690|TANC2_MOUSE Protein TANC2 OS=Mus musculus OX=10090 GN=Tanc2 PE=1 SV=1	0.456467	0	0.000198561	60.564	51.468	60.564					0.456467	0	0.000198561	60.564			S	SPPSSPAHRDSAYISSSPLGSHQVFDFRSNS	0	0	0	0	0	0	0	0
A2A690	1462	A2A690	A2A690	Protein TANC2	Tanc2	sp|A2A690|TANC2_MOUSE Protein TANC2 OS=Mus musculus OX=10090 GN=Tanc2 PE=1 SV=1	0.456467	0	0.000198561	60.564	51.468	60.564					0.456467	0	0.000198561	60.564			S	PPSSPAHRDSAYISSSPLGSHQVFDFRSNSS	0	0	0	0	0	0	0	0
A2A690	1534	A2A690	A2A690	Protein TANC2	Tanc2	sp|A2A690|TANC2_MOUSE Protein TANC2 OS=Mus musculus OX=10090 GN=Tanc2 PE=1 SV=1	0.999997	55.9949	1.71e-24	170.89	147.74	170.89	0.999995	53.4355	4.1e-09	129	0.999997	55.9949	1.71e-24	170.89		1	S	RFSPPPVGGQSKEYPSPPPSPLRRGPQYRAS	3804.4	6427.8	3591.1	4309.5	4261.7	4725.4	2962.7	3909.3
A2A690	1521	A2A690	A2A690	Protein TANC2	Tanc2	sp|A2A690|TANC2_MOUSE Protein TANC2 OS=Mus musculus OX=10090 GN=Tanc2 PE=1 SV=1	0.999987	48.7014	0.00261387	71.176	53.311	71.176					0.999987	48.7014	0.00261387	71.176		1	S	PPHTSPAHQGASYRFSPPPVGGQSKEYPSPP	0	0	0	0	0	0	0	0
A2A690	1446	A2A690	A2A690	Protein TANC2	Tanc2	sp|A2A690|TANC2_MOUSE Protein TANC2 OS=Mus musculus OX=10090 GN=Tanc2 PE=1 SV=1	0.999895	40.5596	4.25e-15	134.29	114.69	134.29	0.998046	30.1064	0.000102963	69.765	0.999895	40.5596	4.25e-15	134.29		1	S	LQTEARPSQGLPVIQSPPSSPAHRDSAYISS	158.15	539.84	298.33	0	434.46	433.62	95.691	109.29
A2A690	400	A2A690	A2A690	Protein TANC2	Tanc2	sp|A2A690|TANC2_MOUSE Protein TANC2 OS=Mus musculus OX=10090 GN=Tanc2 PE=1 SV=1	0.970054	15.1032	0.00160969	71.143	60.861	71.143	0.970054	15.1032	0.00160969	71.143	0.844738	7.31853	0.0131456	41.412		2	S	ALSCHGTRMRQIASDSPHASPKHVDANRELP	0	0	0	0	0	0	0	0
A2A690	404	A2A690	A2A690	Protein TANC2	Tanc2	sp|A2A690|TANC2_MOUSE Protein TANC2 OS=Mus musculus OX=10090 GN=Tanc2 PE=1 SV=1	0.999683	34.8583	0.00160969	71.143	60.861	71.143	0.999683	34.8583	0.00160969	71.143	0.992632	20.5554	0.0131456	41.412		2	S	HGTRMRQIASDSPHASPKHVDANRELPLTQA	0	0	0	0	0	0	0	0
A2A690	1724	A2A690	A2A690	Protein TANC2	Tanc2	sp|A2A690|TANC2_MOUSE Protein TANC2 OS=Mus musculus OX=10090 GN=Tanc2 PE=1 SV=1	0.469739	0	0.0084195	58.831	42.578	58.831					0.469739	0	0.0084195	58.831			S	YRGGMRYSQTPQIGRSQSASYYPVCHSKLDL	0	0	0	0	0	0	0	0
A2A690	1726	A2A690	A2A690	Protein TANC2	Tanc2	sp|A2A690|TANC2_MOUSE Protein TANC2 OS=Mus musculus OX=10090 GN=Tanc2 PE=1 SV=1	0.688283	6.41125	0.000432515	72.433	57.278	72.433	0.688283	6.41125	0.000432515	72.433	0.469739	0	0.0084195	58.831		1	S	GGMRYSQTPQIGRSQSASYYPVCHSKLDLER	383.72	826.22	352.81	743.9	179.01	477.83	241.15	338.1
A2A690	1560	A2A690	A2A690	Protein TANC2	Tanc2	sp|A2A690|TANC2_MOUSE Protein TANC2 OS=Mus musculus OX=10090 GN=Tanc2 PE=1 SV=1	0.371948	0.535958	0.000738129	46.132	37.91	46.132					0.371948	0.535958	0.000738129	46.132			S	QYRASPPAESMSVYRSQSGSPVRYQQETNVS	0	0	0	0	0	0	0	0
A2A690	1744	A2A690	A2A690	Protein TANC2	Tanc2	sp|A2A690|TANC2_MOUSE Protein TANC2 OS=Mus musculus OX=10090 GN=Tanc2 PE=1 SV=1	0.993763	22.2194	2.27e-77	228.73	164.44	186.42	0.929277	11.255	2.27e-77	228.73	0.993763	22.2194	8.79e-41	186.42		1	S	YYPVCHSKLDLERSSSQLGSPDVSHLIRRPI	1463.2	3480.5	1407.7	3522.2	1160.2	2201	1357.5	1737.7
A2A699	475	A2A699	A2A699	Protein FAM171A2	Fam171a2	sp|A2A699|F1712_MOUSE Protein FAM171A2 OS=Mus musculus OX=10090 GN=Fam171a2 PE=1 SV=1	0.99496	22.954	3.13e-09	76.733	68.133	76.733	0.99496	22.954	3.13e-09	76.733						1	S	RRGPAGAAAFLHEPPSPPPSFDHYLGHKGAA	264.42	331.31	288.69	290.17	197.51	190.84	92.728	279.23
A2A699	729	A2A699	A2A699	Protein FAM171A2	Fam171a2	sp|A2A699|F1712_MOUSE Protein FAM171A2 OS=Mus musculus OX=10090 GN=Fam171a2 PE=1 SV=1	0.468113	0	0.000432626	86.291	75.503	86.291	0.468113	0	0.000432626	86.291							S	PPAPPRLALSEDTEPSSSESRTGLCSPEDNS	0	0	0	0	0	0	0	0
A2A699	730	A2A699	A2A699	Protein FAM171A2	Fam171a2	sp|A2A699|F1712_MOUSE Protein FAM171A2 OS=Mus musculus OX=10090 GN=Fam171a2 PE=1 SV=1	0.468113	0	0.000432626	86.291	75.503	86.291	0.468113	0	0.000432626	86.291							S	PAPPRLALSEDTEPSSSESRTGLCSPEDNSL	0	0	0	0	0	0	0	0
A2A699	442	A2A699	A2A699	Protein FAM171A2	Fam171a2	sp|A2A699|F1712_MOUSE Protein FAM171A2 OS=Mus musculus OX=10090 GN=Fam171a2 PE=1 SV=1	0.498445	0	0.00304181	40.142	25.528	40.142					0.498445	0	0.00304181	40.142			S	AEPPGARTVEGAGLKSARSVEGPGGLEPSLD	0	0	0	0	0	0	0	0
A2A699	445	A2A699	A2A699	Protein FAM171A2	Fam171a2	sp|A2A699|F1712_MOUSE Protein FAM171A2 OS=Mus musculus OX=10090 GN=Fam171a2 PE=1 SV=1	1	79.8016	5.13e-31	166.21	141.67	166.21	1	79.8016	5.13e-31	166.21	0.9997	35.2329	0.0001	81.643		1	S	PGARTVEGAGLKSARSVEGPGGLEPSLDEYR	1476.1	2862.6	1921.7	1747.4	1758.3	1328.9	1243.1	1966
A2A6A1	733	A2A6A1	A2A6A1	G patch domain-containing protein 8	Gpatch8	sp|A2A6A1|GPTC8_MOUSE G patch domain-containing protein 8 OS=Mus musculus OX=10090 GN=Gpatch8 PE=1 SV=1	0.495183	0	0.0137586	45.915	27.938	45.915	0.495183	0	0.0137586	45.915							S	AAADSERGPKSEPPGSGSPAPPRRRRRAQDD	0	0	0	0	0	0	0	0
A2A6A1	735	A2A6A1	A2A6A1	G patch domain-containing protein 8	Gpatch8	sp|A2A6A1|GPTC8_MOUSE G patch domain-containing protein 8 OS=Mus musculus OX=10090 GN=Gpatch8 PE=1 SV=1	0.495183	0	0.0137586	45.915	27.938	45.915	0.495183	0	0.0137586	45.915							S	ADSERGPKSEPPGSGSPAPPRRRRRAQDDSQ	0	0	0	0	0	0	0	0
A2A6A1	1039	A2A6A1	A2A6A1	G patch domain-containing protein 8	Gpatch8	sp|A2A6A1|GPTC8_MOUSE G patch domain-containing protein 8 OS=Mus musculus OX=10090 GN=Gpatch8 PE=1 SV=1	0.820794	6.61699	0.0184313	41.967	33.454	41.967	0.820794	6.61699	0.0184313	41.967						1	S	SGRRDFIRSKIYRSQSPHYFQSGRGEGPGKK	298.53	430.79	187.95	346.84	162.02	512.36	303.39	521.07
A2A6T1	407	A2A6T1	A2A6T1	Cerebellar degeneration-related protein 2-like	Cdr2l	sp|A2A6T1|CDR2L_MOUSE Cerebellar degeneration-related protein 2-like OS=Mus musculus OX=10090 GN=Cdr2l PE=1 SV=1	1	56.2048	0.00405279	56.205	40.002	56.205	1	56.2048	0.00405279	56.205						1	S	ISRDSSWRDLLGGEESPGEGKAGEKSLSQHV	253.22	563.07	317.17	408.36	577.23	503.62	381.12	516.37
A2A6T1	178	A2A6T1	A2A6T1	Cerebellar degeneration-related protein 2-like	Cdr2l	sp|A2A6T1|CDR2L_MOUSE Cerebellar degeneration-related protein 2-like OS=Mus musculus OX=10090 GN=Cdr2l PE=1 SV=1	0.333333	0	0.00144229	48.112	37.477	48.112					0.333333	0	0.00144229	48.112			S	ELCTSSRCEDAFRLHSSSLELGPRPLEQENE	0	0	0	0	0	0	0	0
A2A6T1	179	A2A6T1	A2A6T1	Cerebellar degeneration-related protein 2-like	Cdr2l	sp|A2A6T1|CDR2L_MOUSE Cerebellar degeneration-related protein 2-like OS=Mus musculus OX=10090 GN=Cdr2l PE=1 SV=1	0.333333	0	0.00144229	48.112	37.477	48.112					0.333333	0	0.00144229	48.112			S	LCTSSRCEDAFRLHSSSLELGPRPLEQENER	0	0	0	0	0	0	0	0
A2A6T1	180	A2A6T1	A2A6T1	Cerebellar degeneration-related protein 2-like	Cdr2l	sp|A2A6T1|CDR2L_MOUSE Cerebellar degeneration-related protein 2-like OS=Mus musculus OX=10090 GN=Cdr2l PE=1 SV=1	0.333333	0	0.00144229	48.112	37.477	48.112					0.333333	0	0.00144229	48.112			S	CTSSRCEDAFRLHSSSLELGPRPLEQENERL	0	0	0	0	0	0	0	0
A2A6T1	318	A2A6T1	A2A6T1	Cerebellar degeneration-related protein 2-like	Cdr2l	sp|A2A6T1|CDR2L_MOUSE Cerebellar degeneration-related protein 2-like OS=Mus musculus OX=10090 GN=Cdr2l PE=1 SV=1	0.872025	8.64506	0.000124883	95.417	82.364	95.417					0.872025	8.64506	0.000124883	95.417		1	S	SSPAASPSHAVRKSCSDTALNAIVAKDPASR	0	0	0	0	0	0	0	0
A2A716	267	A2A716	A2A716	Oxysterol-binding protein	Osbpl7	tr|A2A716|A2A716_MOUSE Oxysterol-binding protein OS=Mus musculus OX=10090 GN=Osbpl7 PE=1 SV=2	0.999977	46.4257	3.5e-11	152.69	115.93	74.392					0.999977	46.4257	3.5e-11	152.69		1	S	FAKDDTIGRVGRLHGSVPNLSRYLESRDTSG	0	0	0	0	0	0	0	0
A2A791	121	A2A791	A2A791	Zinc finger MYM-type protein 4	Zmym4	sp|A2A791|ZMYM4_MOUSE Zinc finger MYM-type protein 4 OS=Mus musculus OX=10090 GN=Zmym4 PE=1 SV=1	1	155.756	3.09e-64	203.64	186.15	155.76	1	155.756	6.08e-23	155.76	1	148.04	3.09e-64	203.64		1	S	TDGSLEVERRAAHQESDNENEIQIQNQLKKD	2798.1	2743.8	1532.6	6822.1	2069.3	2099.1	2241.6	1809.3
A2A7B5	638	A2A7B5	A2A7B5		Prdm2	tr|A2A7B5|A2A7B5_MOUSE PR domain containing 2
A2A7S8	543	A2A7S8	A2A7S8	Uncharacterized protein KIAA1522	Kiaa1522	sp|A2A7S8|K1522_MOUSE Uncharacterized protein KIAA1522 OS=Mus musculus OX=10090 GN=Kiaa1522 PE=1 SV=1	1	78.6552	0.00143111	78.655	52.717	78.655					1	78.6552	0.00143111	78.655		1	S	GTPTLPPKGLAVAPASPGKAQPPKPDRVTSL	0	0	0	0	0	0	0	0
A2A7S8	402	A2A7S8	A2A7S8	Uncharacterized protein KIAA1522	Kiaa1522	sp|A2A7S8|K1522_MOUSE Uncharacterized protein KIAA1522 OS=Mus musculus OX=10090 GN=Kiaa1522 PE=1 SV=1	0.868446	8.2914	5.92e-06	104.45	69.77	104.45	0.868446	8.2914	5.92e-06	104.45						1	S	SNNVAPPPPGGSGRGSPSGGSTAETSDTASI	772.34	1641.9	1155.4	814.81	1406.2	1723.7	1143.2	1331.9
A2A7S8	909	A2A7S8	A2A7S8	Uncharacterized protein KIAA1522	Kiaa1522	sp|A2A7S8|K1522_MOUSE Uncharacterized protein KIAA1522 OS=Mus musculus OX=10090 GN=Kiaa1522 PE=1 SV=1	1	56.0552	3.13e-05	100.28	84.143	56.055	1	56.0552	0.000658974	56.055	1	100.282	3.13e-05	100.28		1	S	IFSKGTKKLQLERPVSPEAQADLQRNLVAEL	442.23	1001.4	209.11	858.53	208.55	712.94	429.08	523.46
A2A7S8	610	A2A7S8	A2A7S8	Uncharacterized protein KIAA1522	Kiaa1522	sp|A2A7S8|K1522_MOUSE Uncharacterized protein KIAA1522 OS=Mus musculus OX=10090 GN=Kiaa1522 PE=1 SV=1	0.999101	30.4609	0.0111879	52.693	39.639	52.693					0.999101	30.4609	0.0111879	52.693		1	S	DRFVIPPHPKVPAPFSPPPSKSKSSNQAAPV	0	0	0	0	0	0	0	0
A2A870	60	A2A870	A2A870	Fas-binding factor 1	Fbf1	sp|A2A870|FBF1_MOUSE Fas-binding factor 1 OS=Mus musculus OX=10090 GN=Fbf1 PE=1 SV=1	0.974436	15.9912	0.00263973	64.65	42.419	64.65					0.974436	15.9912	0.00263973	64.65		1	S	EKPAEPASHAKDTASSPQWQASKAKFLPKDS	0	0	0	0	0	0	0	0
A2A891	1205	A2A891	A2A891	Calmodulin-binding transcription activator 1	Camta1	sp|A2A891|CMTA1_MOUSE Calmodulin-binding transcription activator 1 OS=Mus musculus OX=10090 GN=Camta1 PE=2 SV=1	1	47.559	0.0258922	47.559	31.356	47.559					1	47.559	0.0258922	47.559		1	S	PTTDSWMAQWQREAMSPPEIPKGVTVIASTN	0	0	0	0	0	0	0	0
A2A8L1	1633	A2A8L1	A2A8L1	Chromodomain-helicase-DNA-binding protein 5	Chd5	sp|A2A8L1|CHD5_MOUSE Chromodomain-helicase-DNA-binding protein 5 OS=Mus musculus OX=10090 GN=Chd5 PE=1 SV=1	1	84.9536	0.000680912	84.954	50.567	84.954					1	84.9536	0.000680912	84.954		1	S	RAREERTEEVEKAQGSPEQPLKEEVLPDKEP	0	0	0	0	0	0	0	0
A2A8Z1	326	A2A8Z1	A2A8Z1	Oxysterol-binding protein-related protein 9	Osbpl9	sp|A2A8Z1|OSBL9_MOUSE Oxysterol-binding protein-related protein 9 OS=Mus musculus OX=10090 GN=Osbpl9 PE=1 SV=1	0.793536	6.21095	3.09e-23	149	127.63	149					0.793536	6.21095	3.09e-23	149		1	S	LIDSSGSASVLTHSSSGNSLKRPDTTESLNS	0	0	0	0	0	0	0	0
A2A8Z1	329	A2A8Z1	A2A8Z1	Oxysterol-binding protein-related protein 9	Osbpl9	sp|A2A8Z1|OSBL9_MOUSE Oxysterol-binding protein-related protein 9 OS=Mus musculus OX=10090 GN=Osbpl9 PE=1 SV=1	0.865688	9.64138	1.23e-07	59.912	47.552	59.912					0.865688	9.64138	1.23e-07	59.912		1	S	SSGSASVLTHSSSGNSLKRPDTTESLNSSMS	0	0	0	0	0	0	0	0
A2A9G7	109	A2A9G7	A2A9G7	Membrane protein FAM159A	Fam159a	sp|A2A9G7|SHL2A_MOUSE Protein shisa-like-2A OS=Mus musculus OX=10090 GN=Shisal2a PE=3 SV=1	0.7724	5.35315	2.15e-11	126.63	86.716	126.63					0.7724	5.35315	2.15e-11	126.63		1	S	PQTKLDPGLSLQTTGSKEMSPDHHGLNTAIP	0	0	0	0	0	0	0	0
A2AAE1	4124	A2AAE1	A2AAE1	Uncharacterized protein KIAA1109	Kiaa1109	sp|A2AAE1|BLTP1_MOUSE Bridge-like lipid transfer protein family member 1 OS=Mus musculus OX=10090 GN=Bltp1 PE=1 SV=4	0.996555	27.6229	0.00139775	59.898	47.272	59.898					0.996555	27.6229	0.00139775	59.898		1	S	TSASKAGMPGSSGLGSPLGRSRHSSSQSDLT	0	0	0	0	0	0	0	0
A2AAE1	3196	A2AAE1	A2AAE1	Uncharacterized protein KIAA1109	Kiaa1109	sp|A2AAE1|BLTP1_MOUSE Bridge-like lipid transfer protein family member 1 OS=Mus musculus OX=10090 GN=Bltp1 PE=1 SV=4	0.99746	26.4956	8.42e-06	122.51	80.51	122.51					0.99746	26.4956	8.42e-06	122.51		1	S	GLIELELSNRLQTKASPGSSSYLKLFGKCQV	0	0	0	0	0	0	0	0
A2AAE1	2368	A2AAE1	A2AAE1	Uncharacterized protein KIAA1109	Kiaa1109	sp|A2AAE1|BLTP1_MOUSE Bridge-like lipid transfer protein family member 1 OS=Mus musculus OX=10090 GN=Bltp1 PE=1 SV=4	0.981776	17.5111	0.0109505	53.034	32.705	53.034	0.981776	17.5111	0.0109505	53.034						1	S	WMSNAVGNRGSVVQESPVTKSGHNSLPTGVA	666.58	1104.9	247.32	647.46	557.65	820.28	505.39	584.7
A2AAE1	2924	A2AAE1	A2AAE1	Uncharacterized protein KIAA1109	Kiaa1109	sp|A2AAE1|BLTP1_MOUSE Bridge-like lipid transfer protein family member 1 OS=Mus musculus OX=10090 GN=Bltp1 PE=1 SV=4	1	63.2161	0.0139919	63.216	12.15	63.216	1	63.2161	0.0139919	63.216						1	S	HSMMVRSSHQLSKQISDLIRQPSTAPQPMKE	1205	1326.7	1054.4	1016.6	680.93	887.41	577.54	887.76
A2AAE1	1284	A2AAE1	A2AAE1	Uncharacterized protein KIAA1109	Kiaa1109	sp|A2AAE1|BLTP1_MOUSE Bridge-like lipid transfer protein family member 1 OS=Mus musculus OX=10090 GN=Bltp1 PE=1 SV=4	0.307169	0	2.27e-05	56.303	41.69	56.303					0.307169	0	2.27e-05	56.303			S	SARRDDGQASVPTEISGTSPVSPNTQDKSVG	0	0	0	0	0	0	0	0
A2AAE1	1287	A2AAE1	A2AAE1	Uncharacterized protein KIAA1109	Kiaa1109	sp|A2AAE1|BLTP1_MOUSE Bridge-like lipid transfer protein family member 1 OS=Mus musculus OX=10090 GN=Bltp1 PE=1 SV=4	0.307169	0	2.27e-05	56.303	41.69	56.303					0.307169	0	2.27e-05	56.303			S	RDDGQASVPTEISGTSPVSPNTQDKSVGQSP	0	0	0	0	0	0	0	0
A2AAE1	1355	A2AAE1	A2AAE1	Uncharacterized protein KIAA1109	Kiaa1109	sp|A2AAE1|BLTP1_MOUSE Bridge-like lipid transfer protein family member 1 OS=Mus musculus OX=10090 GN=Bltp1 PE=1 SV=4	0.999994	52.2036	0.00146477	77.64	46.21	77.64	0.999994	52.2036	0.00146477	77.64						1	S	QFSSDVSRSDENVLDSPKQRRSFGSFPYTPS	3673.4	7850.5	1795.1	7156.8	2264.3	6764.8	2572.5	3651.4
A2AAE1	1323	A2AAE1	A2AAE1	Uncharacterized protein KIAA1109	Kiaa1109	sp|A2AAE1|BLTP1_MOUSE Bridge-like lipid transfer protein family member 1 OS=Mus musculus OX=10090 GN=Bltp1 PE=1 SV=4	0.985059	18.1908	0.0182641	48.741	30.126	48.741					0.985059	18.1908	0.0182641	48.741		1	S	KRQASVCSTRLGSTKSLTAAFYGDKQPVTVG	0	0	0	0	0	0	0	0
A2AAE1	1681	A2AAE1	A2AAE1	Uncharacterized protein KIAA1109	Kiaa1109	sp|A2AAE1|BLTP1_MOUSE Bridge-like lipid transfer protein family member 1 OS=Mus musculus OX=10090 GN=Bltp1 PE=1 SV=4	0.999997	55.3044	2.3e-16	164.48	119.62	125.28	0.999997	55.3044	6.37e-06	125.28	0.999992	50.8758	2.3e-16	164.48		1	S	REAVQNSKTTFSENLSPKQDIRGTKTEHPMI	1514.2	1741	743.34	1611.4	1108.7	1871.6	1107.2	1433.7
A2AAE1	2755	A2AAE1	A2AAE1	Uncharacterized protein KIAA1109	Kiaa1109	sp|A2AAE1|BLTP1_MOUSE Bridge-like lipid transfer protein family member 1 OS=Mus musculus OX=10090 GN=Bltp1 PE=1 SV=4	0.987275	18.8979	9.38e-05	98.531	81.505	98.531	0.987275	18.8979	9.38e-05	98.531	0.982064	17.3841	0.00072669	61.375		1	S	EPTCRVVFENEQDNNSLTKTQRKRSLVTSEP	2027.7	2995.1	2467.1	2592.6	1860.4	2735.8	1731.6	2228.3
A2AAE1	2603	A2AAE1	A2AAE1	Uncharacterized protein KIAA1109	Kiaa1109	sp|A2AAE1|BLTP1_MOUSE Bridge-like lipid transfer protein family member 1 OS=Mus musculus OX=10090 GN=Bltp1 PE=1 SV=4	0.845746	10.4897	2.01e-28	178.22	143.45	178.22	0.490265	0	8.87e-06	107.65	0.845746	10.4897	2.01e-28	178.22		1	S	TQTDIKLSRYTAGSASPTPTFKTRKHRDFRS	0	0	0	0	0	0	0	0
A2AAJ9	8373	A2AAJ9	A2AAJ9	Obscurin	Obscn	sp|A2AAJ9|OBSCN_MOUSE Obscurin OS=Mus musculus OX=10090 GN=Obscn PE=1 SV=3	1	44.1159	0.00691052	77.282	69.198	44.116	1	44.1159	0.00691052	77.282	1	58.815	0.010529	69.198		1	S	GPEREGPPRKKAGLASFRLSGLKGRDQELSD	53066	89524	39621	47281	68166	64685	53904	40484
A2AB59	458	A2AB59	A2AB59	Rho GTPase-activating protein 27	Arhgap27	sp|A2AB59|RHG27_MOUSE Rho GTPase-activating protein 27 OS=Mus musculus OX=10090 GN=Arhgap27 PE=1 SV=1	0.383053	0	8.42e-05	71.091	51.252	71.091					0.383053	0	8.42e-05	71.091			S	ELPQVPIPAPRSVRKSSQDSDTPAQASPPEE	0	0	0	0	0	0	0	0
A2AB59	459	A2AB59	A2AB59	Rho GTPase-activating protein 27	Arhgap27	sp|A2AB59|RHG27_MOUSE Rho GTPase-activating protein 27 OS=Mus musculus OX=10090 GN=Arhgap27 PE=1 SV=1	0.383053	0	8.42e-05	71.091	51.252	71.091					0.383053	0	8.42e-05	71.091			S	LPQVPIPAPRSVRKSSQDSDTPAQASPPEEK	0	0	0	0	0	0	0	0
A2AB59	462	A2AB59	A2AB59	Rho GTPase-activating protein 27	Arhgap27	sp|A2AB59|RHG27_MOUSE Rho GTPase-activating protein 27 OS=Mus musculus OX=10090 GN=Arhgap27 PE=1 SV=1	0.393973	1.2437	7.15e-05	72.771	47.565	72.771	0.393973	1.2437	7.15e-05	72.771							S	VPIPAPRSVRKSSQDSDTPAQASPPEEKIKT	0	0	0	0	0	0	0	0
A2ACP1	577	A2ACP1	A2ACP1	Tetratricopeptide repeat protein 39A	Ttc39a	sp|A2ACP1|TT39A_MOUSE Tetratricopeptide repeat protein 39A OS=Mus musculus OX=10090 GN=Ttc39a PE=2 SV=1	0.987558	19.5331	0.0259504	50.607	39.734	50.607					0.987558	19.5331	0.0259504	50.607		1	S	RSSLEDGNRSLVSSVSL______________	0	0	0	0	0	0	0	0
A2ADM8	493	A2ADM8	A2ADM8		Zfp831	tr|A2ADM8|A2ADM8_MOUSE Zinc finger protein 831 OS=Mus musculus OX=10090 GN=Zfp831 PE=1 SV=1	0.805413	6.27841	0.029643	44.299	32.452	44.299	0.805413	6.27841	0.029643	44.299						1	S	QLSTTVECVPVTRSNSLPFVEGSKLWPEQRD	547.22	601.02	453.21	272.8	412.81	429.32	510.12	530.14
A2ADY9	120	A2ADY9	A2ADY9	Protein DDI1 homolog 2	Ddi2	sp|A2ADY9|DDI2_MOUSE Protein DDI1 homolog 2 OS=Mus musculus OX=10090 GN=Ddi2 PE=1 SV=1	0.561225	1.10248	4.89e-09	89.396	75.38	89.396					0.561225	1.10248	4.89e-09	89.396		1	S	SNPQQRQLPRTQAQHSSPGEMASSPQGLDNP	0	0	0	0	0	0	0	0
A2ADY9	121	A2ADY9	A2ADY9	Protein DDI1 homolog 2	Ddi2	sp|A2ADY9|DDI2_MOUSE Protein DDI1 homolog 2 OS=Mus musculus OX=10090 GN=Ddi2 PE=1 SV=1	0.955255	13.5101	7.02e-15	119.01	102.34	119.01	0.955255	13.5101	7.02e-15	119.01	0.815941	6.51712	2.41e-12	100.68		1	S	NPQQRQLPRTQAQHSSPGEMASSPQGLDNPA	649.78	1351.7	725.12	878.58	356.25	661.68	377.54	480.81
A2ADY9	127	A2ADY9	A2ADY9	Protein DDI1 homolog 2	Ddi2	sp|A2ADY9|DDI2_MOUSE Protein DDI1 homolog 2 OS=Mus musculus OX=10090 GN=Ddi2 PE=1 SV=1	0.499887	0	2.02e-12	102.16	88.973	102.16					0.499887	0	2.02e-12	102.16			S	LPRTQAQHSSPGEMASSPQGLDNPALLRDML	0	0	0	0	0	0	0	0
A2ADY9	128	A2ADY9	A2ADY9	Protein DDI1 homolog 2	Ddi2	sp|A2ADY9|DDI2_MOUSE Protein DDI1 homolog 2 OS=Mus musculus OX=10090 GN=Ddi2 PE=1 SV=1	0.782623	5.57697	2.02e-12	102.16	88.973	82.726	0.782623	5.57697	1.75e-07	82.726	0.600707	1.7744	2.02e-12	102.16		1	S	PRTQAQHSSPGEMASSPQGLDNPALLRDMLL	566.15	837.65	342	660.38	126.15	434.97	245.64	463.35
A2AEV7	357	A2AEV7	A2AEV7		Ccdc120	sp|A2AEV7|CC120_MOUSE Coiled-coil domain-containing protein 120 OS=Mus musculus OX=10090 GN=Ccdc120 PE=1 SV=1	0.956034	13.7883	2.88e-13	152	126.44	152					0.956034	13.7883	2.88e-13	152		1	S	SDRASLFAARTRRSNSSEALLVDRAAAGGAG	0	0	0	0	0	0	0	0
A2AEV7	358	A2AEV7	A2AEV7		Ccdc120	sp|A2AEV7|CC120_MOUSE Coiled-coil domain-containing protein 120 OS=Mus musculus OX=10090 GN=Ccdc120 PE=1 SV=1	0.717884	4.09785	1.73e-24	170.74	137.96	170.74	0.717884	4.09785	1.73e-24	170.74						1	S	DRASLFAARTRRSNSSEALLVDRAAAGGAGS	4128.6	4992.2	2699.2	3361.6	4124.6	3084.7	2595.2	4843.7
A2AF47	1237	A2AF47	A2AF47	Dedicator of cytokinesis protein 11	Dock11	sp|A2AF47|DOC11_MOUSE Dedicator of cytokinesis protein 11 OS=Mus musculus OX=10090 GN=Dock11 PE=1 SV=1	0.89458	9.29326	1.04e-30	151.41	137.68	151.41					0.89458	9.29326	1.04e-30	151.41		1	S	AYGSFQNGHGIKREDSRGSLIPEGATGFPDP	0	0	0	0	0	0	0	0
Q8R3R5;A2AF53	333;333	Q8R3R5	Q8R3R5	Transmembrane protein 185B;Transmembrane protein 185A	Tmem185b;Tmem185a	sp|Q8R3R5|T185B_MOUSE Transmembrane protein 185B OS=Mus musculus OX=10090 GN=Tmem185b PE=2 SV=1;sp|A2AF53|T185A_MOUSE Transmembrane protein 185A OS=Mus musculus OX=10090 GN=Tmem185a PE=1 SV=1	0.999999	60.7918	1.2e-42	195.36	159.85	195.36	0.999999	60.7918	1.2e-42	195.36	0.999835	37.824	1.59e-10	152.69		1	S	IAPMFGKKARVVITQSPGKYVPPPPKLNIDM	6614.2	10474	1593.4	7609.7	6138.8	6296.1	5359.8	6087.9
A2AG50	255	A2AG50	A2AG50	MAP7 domain-containing protein 2	Map7d2	sp|A2AG50|MA7D2_MOUSE MAP7 domain-containing protein 2 OS=Mus musculus OX=10090 GN=Map7d2 PE=1 SV=1	1	52.7161	0.0358108	52.716	22.146	52.716					1	52.7161	0.0358108	52.716		1	S	SSTVAISYSPDRALGSPLKSSYKSSPTRTTE	0	0	0	0	0	0	0	0
A2AG50	401	A2AG50	A2AG50	MAP7 domain-containing protein 2	Map7d2	sp|A2AG50|MA7D2_MOUSE MAP7 domain-containing protein 2 OS=Mus musculus OX=10090 GN=Map7d2 PE=1 SV=1	1	73.8702	1.3e-127	225.5	181.81	225.5	0.999963	47.3567	4.09e-06	96.317	1	73.8702	1.3e-127	225.5		1	S	EGAPGQQSTVLPREESLEKRMADKYATEKYV	13585	16393	3377.4	15388	7486.9	13056	8870.3	12916
A2AG50	248	A2AG50	A2AG50	MAP7 domain-containing protein 2	Map7d2	sp|A2AG50|MA7D2_MOUSE MAP7 domain-containing protein 2 OS=Mus musculus OX=10090 GN=Map7d2 PE=1 SV=1	0.873392	8.38889	2.02e-06	114.56	100.14	114.56					0.873392	8.38889	2.02e-06	114.56		1	S	PMSKHLSSSTVAISYSPDRALGSPLKSSYKS	0	0	0	0	0	0	0	0
A2AG50	357	A2AG50	A2AG50	MAP7 domain-containing protein 2	Map7d2	sp|A2AG50|MA7D2_MOUSE MAP7 domain-containing protein 2 OS=Mus musculus OX=10090 GN=Map7d2 PE=1 SV=1	0.999738	35.8082	0.000141528	104.43	78.315	104.43	0.997852	26.6709	0.014337	52.79	0.999738	35.8082	0.000141528	104.43		1	S	TYPQSPKTAKPTYLGSPVKYYFPPIANEETP	786.13	2172.1	0	1693.4	300.16	699.7	446.03	542.42
A2AG50	683	A2AG50	A2AG50	MAP7 domain-containing protein 2	Map7d2	sp|A2AG50|MA7D2_MOUSE MAP7 domain-containing protein 2 OS=Mus musculus OX=10090 GN=Map7d2 PE=1 SV=1	0.498763	0	0.000330404	53.262	42.795	53.262	0.498763	0	0.000330404	53.262							S	KPVGGPVHLDVLDGKSNSLDDSTEDVQSMDV	0	0	0	0	0	0	0	0
A2AG50	685	A2AG50	A2AG50	MAP7 domain-containing protein 2	Map7d2	sp|A2AG50|MA7D2_MOUSE MAP7 domain-containing protein 2 OS=Mus musculus OX=10090 GN=Map7d2 PE=1 SV=1	0.498763	0	0.000330404	53.262	42.795	53.262	0.498763	0	0.000330404	53.262							S	VGGPVHLDVLDGKSNSLDDSTEDVQSMDVSP	0	0	0	0	0	0	0	0
A2AG50	689	A2AG50	A2AG50	MAP7 domain-containing protein 2	Map7d2	sp|A2AG50|MA7D2_MOUSE MAP7 domain-containing protein 2 OS=Mus musculus OX=10090 GN=Map7d2 PE=1 SV=1	0.98755	20.8813	9.26e-55	156.22	138.52	156.22					0.98755	20.8813	9.26e-55	156.22		1	S	VHLDVLDGKSNSLDDSTEDVQSMDVSPVSKE	0	0	0	0	0	0	0	0
A2AG50	695	A2AG50	A2AG50	MAP7 domain-containing protein 2	Map7d2	sp|A2AG50|MA7D2_MOUSE MAP7 domain-containing protein 2 OS=Mus musculus OX=10090 GN=Map7d2 PE=1 SV=1	0.954434	13.2189	1.1e-52	183.96	161.08	183.96					0.954434	13.2189	1.1e-52	183.96		1	S	DGKSNSLDDSTEDVQSMDVSPVSKEELISIP	0	0	0	0	0	0	0	0
A2AG50	699	A2AG50	A2AG50	MAP7 domain-containing protein 2	Map7d2	sp|A2AG50|MA7D2_MOUSE MAP7 domain-containing protein 2 OS=Mus musculus OX=10090 GN=Map7d2 PE=1 SV=1	0.906085	11.7946	1.22e-09	110.03	93.342	83.881					0.906085	11.7946	1.22e-09	110.03		1	S	NSLDDSTEDVQSMDVSPVSKEELISIPEFSP	0	0	0	0	0	0	0	0
A2AG50	756	A2AG50	A2AG50	MAP7 domain-containing protein 2	Map7d2	sp|A2AG50|MA7D2_MOUSE MAP7 domain-containing protein 2 OS=Mus musculus OX=10090 GN=Map7d2 PE=1 SV=1	0.88753	11.9817	0.0248735	42.809	20.936	42.809					0.88753	11.9817	0.0248735	42.809		1	S	FTGPPAFPKKSSENLSLDDCNKNLIEGFNSP	0	0	0	0	0	0	0	0
A2AHC3	1069	A2AHC3	A2AHC3	Calmodulin-regulated spectrin-associated protein 1	Camsap1	sp|A2AHC3|CAMP1_MOUSE Calmodulin-regulated spectrin-associated protein 1 OS=Mus musculus OX=10090 GN=Camsap1 PE=1 SV=1	0.983365	17.717	6.13e-07	111.74	82.4	101.49					0.983365	17.717	6.13e-07	111.74		1	S	QDQKIKAPVHFVEPLSPTGVPGHRKPPRLGQ	0	0	0	0	0	0	0	0
A2AHC3	550	A2AHC3	A2AHC3	Calmodulin-regulated spectrin-associated protein 1	Camsap1	sp|A2AHC3|CAMP1_MOUSE Calmodulin-regulated spectrin-associated protein 1 OS=Mus musculus OX=10090 GN=Camsap1 PE=1 SV=1	0.979623	17.5235	0.000719898	80.69	39.15	74.698	0.804922	6.76355	0.00965546	51.841	0.979623	17.5235	0.000719898	80.69		1	S	EDEDEELVAIIRTDVSPPSPQMPRTSPQAPG	777.83	898.89	562.4	788	681.28	667.46	615.97	826.65
A2AHC3	553	A2AHC3	A2AHC3	Calmodulin-regulated spectrin-associated protein 1	Camsap1	sp|A2AHC3|CAMP1_MOUSE Calmodulin-regulated spectrin-associated protein 1 OS=Mus musculus OX=10090 GN=Camsap1 PE=1 SV=1	0.907377	10.1462	0.000344609	87.001	45.461	40.352	0.817525	6.53227	0.000344609	87.001	0.907377	10.1462	0.0361883	40.352		1	S	DEELVAIIRTDVSPPSPQMPRTSPQAPGLVA	734.2	904.97	393.78	443.27	356.02	633.81	365.62	727.83
A2AHL1	22	A2AHL1	A2AHL1	Anoctamin-3	Ano3	sp|A2AHL1|ANO3_MOUSE Anoctamin-3 OS=Mus musculus OX=10090 GN=Ano3 PE=1 SV=1	0.982871	18.2586	0.00683183	59.542	28.972	59.542	0.982871	18.2586	0.00683183	59.542						1	S	SIQSFKQQKGMNISKSEITTEASLKPSRRSL	480.73	1011.1	138.2	511.58	776.07	646.6	610.21	1225.4
A2AHL1	36	A2AHL1	A2AHL1	Anoctamin-3	Ano3	sp|A2AHL1|ANO3_MOUSE Anoctamin-3 OS=Mus musculus OX=10090 GN=Ano3 PE=1 SV=1	0.777711	5.50226	0.0120335	40.187	28.925	40.187	0.777711	5.50226	0.0120335	40.187						1	S	KSEITTEASLKPSRRSLPCLAQSYAHSKSLS	215.45	785.14	378.19	282.32	206.42	353.25	343.53	450.1
A2AIG8	490	A2AIG8	A2AIG8	1-aminocyclopropane-1-carboxylate synthase-like protein 1	Accs	sp|A2AIG8|1A1L1_MOUSE 1-aminocyclopropane-1-carboxylate synthase-like protein 1 OS=Mus musculus OX=10090 GN=Accs PE=2 SV=1	1	99.8891	2.15e-85	210.93	202.9	210.93					1	99.8891	2.15e-85	210.93		1	S	MRQVLEGQSQVVEDASPCHAQEPQSQPR___	0	0	0	0	0	0	0	0
A2AIP0	66	A2AIP0	A2AIP0	Protein FAM166B	Fam166b	sp|A2AIP0|CMI2B_MOUSE Ciliary microtubule inner protein 2B OS=Mus musculus OX=10090 GN=Cimip2b PE=2 SV=1	1	65.2116	0.000352321	90.685	69.784	90.685					1	65.2116	0.000352321	90.685		1	S	LAWPPAHRTLLPPIQSPRSPVISKGRLPPRR	0	0	0	0	0	0	0	0
A2AIR5	986	A2AIR5	A2AIR5		Grin3a	sp|A2AIR5|NMD3A_MOUSE Glutamate receptor ionotropic
A2AIV2	173	A2AIV2	A2AIV2	Protein virilizer homolog	Kiaa1429	sp|A2AIV2|VIR_MOUSE Protein virilizer homolog OS=Mus musculus OX=10090 GN=Virma PE=1 SV=1	1	40.0847	0.00930144	40.085	27.919	40.085	1	40.0847	0.00930144	40.085						1	S	NLKHADGEKEDQFNGSPPRPQPRGPRTPPGP	565.31	934.24	0	778.31	408.15	604.93	604.75	739.16
A2AIV2	1578	A2AIV2	A2AIV2	Protein virilizer homolog	Kiaa1429	sp|A2AIV2|VIR_MOUSE Protein virilizer homolog OS=Mus musculus OX=10090 GN=Virma PE=1 SV=1	0.999372	32.0149	1.6e-25	180.2	135.85	180.2	0.999189	30.9146	3.26e-25	179.19	0.999372	32.0149	1.6e-25	180.2		1	S	DLHSELERSFLSEPSSPGRSKTTKGFKLGKH	4097	5643.8	5173.8	4651.5	3396.5	4707	3153	4448.4
A2AJA9	109	A2AJA9	A2AJA9	Uncharacterized protein C9orf172 homolog	Gm996	sp|A2AJA9|AJM1_MOUSE Apical junction component 1 homolog OS=Mus musculus OX=10090 GN=Ajm1 PE=1 SV=1	0.999672	34.8384	3.63e-171	282.57	252.01	282.57	0.999389	32.1371	5.63e-111	247.67	0.999672	34.8384	3.63e-171	282.57		1	S	KSAPRASQGLATAPASPPVLQRRGREAQRAV	19362	24079	20865	19401	15913	19209	13440	18118
A2AJA9	794	A2AJA9	A2AJA9	Uncharacterized protein C9orf172 homolog	Gm996	sp|A2AJA9|AJM1_MOUSE Apical junction component 1 homolog OS=Mus musculus OX=10090 GN=Ajm1 PE=1 SV=1	0.999966	44.7362	4.26e-05	99.747	87.581	99.747	0.999966	44.7362	4.26e-05	99.747	0.999844	38.0777	0.00136664	57.136		1	S	YLSLRELATHAAPLGSYARELAAAGRLYEPA	785.62	1086.5	1392.1	1076.2	831.97	1138.1	947.8	1322.8
A2AJA9	468	A2AJA9	A2AJA9	Uncharacterized protein C9orf172 homolog	Gm996	sp|A2AJA9|AJM1_MOUSE Apical junction component 1 homolog OS=Mus musculus OX=10090 GN=Ajm1 PE=1 SV=1	1	53.3271	1.9e-11	152.4	134.3	53.327	1	53.3271	1.12e-07	134.18	1	99.5681	1.9e-11	152.4		1	S	LAPGPRREDPLGRGRSYENLLGREVRDTRGS	6066.3	8573.8	5478.9	6408.2	5582.3	7190.1	4462.5	5817.5
A2AJA9	499	A2AJA9	A2AJA9	Uncharacterized protein C9orf172 homolog	Gm996	sp|A2AJA9|AJM1_MOUSE Apical junction component 1 homolog OS=Mus musculus OX=10090 GN=Ajm1 PE=1 SV=1	0.973126	15.7198	3.67e-11	107.97	70.622	107.97	0.630634	5.3335	0.018932	58.781	0.973126	15.7198	3.67e-11	107.97		1	S	SPEGRRPPVVVNLSTSPRRYAALSLSETSLT	663.98	1404	1030.1	585.16	1320	893.46	881	909.98
A2AJA9	854	A2AJA9	A2AJA9	Uncharacterized protein C9orf172 homolog	Gm996	sp|A2AJA9|AJM1_MOUSE Apical junction component 1 homolog OS=Mus musculus OX=10090 GN=Ajm1 PE=1 SV=1	0.96696	14.6636	1.28e-21	145.81	124.42	96.866	0.96696	14.6636	0.000173865	96.866	0.909101	10.0005	1.28e-21	145.81		1	S	GPTVRKFAKVALAAGSPTRPPPARGGEPDME	3766.4	4786.7	4393.8	3668.4	3377.5	3985.5	3137.5	3584
A2AJA9	129	A2AJA9	A2AJA9	Uncharacterized protein C9orf172 homolog	Gm996	sp|A2AJA9|AJM1_MOUSE Apical junction component 1 homolog OS=Mus musculus OX=10090 GN=Ajm1 PE=1 SV=1	0.999924	41.1773	0.000542119	64.507	48.369	64.507	0.999924	41.1773	0.000542119	64.507						1	S	QRRGREAQRAVRVEGSPRREPSYPALRALAN	824.28	551.54	1041.5	1873	350.26	278.51	223.42	702.88
A2AJA9	509	A2AJA9	A2AJA9	Uncharacterized protein C9orf172 homolog	Gm996	sp|A2AJA9|AJM1_MOUSE Apical junction component 1 homolog OS=Mus musculus OX=10090 GN=Ajm1 PE=1 SV=1	0.998366	30.7	5.56e-16	138.87	107.91	138.87					0.998366	30.7	5.56e-16	138.87		1	S	VNLSTSPRRYAALSLSETSLTEKGRAGESLG	0	0	0	0	0	0	0	0
A2AJA9	512	A2AJA9	A2AJA9	Uncharacterized protein C9orf172 homolog	Gm996	sp|A2AJA9|AJM1_MOUSE Apical junction component 1 homolog OS=Mus musculus OX=10090 GN=Ajm1 PE=1 SV=1	0.463152	0	0.000949484	90.629	65.775	90.629	0.460284	0	0.00127685	77.677	0.463152	0	0.000949484	90.629			S	STSPRRYAALSLSETSLTEKGRAGESLGRNW	0	0	0	0	0	0	0	0
A2AJI0	254	A2AJI0	A2AJI0	MAP7 domain-containing protein 1	Map7d1	sp|A2AJI0|MA7D1_MOUSE MAP7 domain-containing protein 1 OS=Mus musculus OX=10090 GN=Map7d1 PE=1 SV=1	0.978753	16.6338	0.00342627	67.726	34.156	67.726					0.978753	16.6338	0.00342627	67.726		1	S	LHHSSPGRKTSGSRCSVSAVNLPKHVDSIIN	0	0	0	0	0	0	0	0
A2AJI0	544	A2AJI0	A2AJI0	MAP7 domain-containing protein 1	Map7d1	sp|A2AJI0|MA7D1_MOUSE MAP7 domain-containing protein 1 OS=Mus musculus OX=10090 GN=Map7d1 PE=1 SV=1	0.998858	29.4216	9.02e-26	151.23	134.28	107.83	0.998858	29.4216	1.87e-12	107.83	0.998349	27.8168	9.02e-26	151.23		1;2	S	RKSRAAEEKEPAAPASPAPSPVPSPTPAQPQ	697.48	1194.4	0	880.09	513.65	422.45	363.14	618.18
A2AJI0	548	A2AJI0	A2AJI0	MAP7 domain-containing protein 1	Map7d1	sp|A2AJI0|MA7D1_MOUSE MAP7 domain-containing protein 1 OS=Mus musculus OX=10090 GN=Map7d1 PE=1 SV=1	0.988911	20.9094	5.75e-09	96.734	86.075	65.275	0.601244	2.50811	5.75e-09	96.734	0.988911	20.9094	7.58e-06	65.275		1;2	S	AAEEKEPAAPASPAPSPVPSPTPAQPQKEQS	728.6	1599.8	0	1078.7	738.33	919.19	408.7	847.86
A2AJI0	552	A2AJI0	A2AJI0	MAP7 domain-containing protein 1	Map7d1	sp|A2AJI0|MA7D1_MOUSE MAP7 domain-containing protein 1 OS=Mus musculus OX=10090 GN=Map7d1 PE=1 SV=1	0.904721	10.3576	2.2e-06	77.984	60.643	74.047					0.904721	10.3576	2.2e-06	77.984		1;2	S	KEPAAPASPAPSPVPSPTPAQPQKEQSSTQI	0	0	0	0	0	0	0	0
A2AJI0	519	A2AJI0	A2AJI0	MAP7 domain-containing protein 1	Map7d1	sp|A2AJI0|MA7D1_MOUSE MAP7 domain-containing protein 1 OS=Mus musculus OX=10090 GN=Map7d1 PE=1 SV=1	0.801462	7.05351	0.0123995	50.95	19.311	50.95	0.801462	7.05351	0.0123995	50.95						1	S	PKGRVRRKEEAKESPSPSGPEDKNHRKSRAA	513.22	1068.4	0	284.26	456.18	472.62	355.34	524.32
A2AJI0	454	A2AJI0	A2AJI0	MAP7 domain-containing protein 1	Map7d1	sp|A2AJI0|MA7D1_MOUSE MAP7 domain-containing protein 1 OS=Mus musculus OX=10090 GN=Map7d1 PE=1 SV=1	0.637981	3.82944	0.00247341	71.555	48.815	71.555	0.637981	3.82944	0.00247341	71.555						1	S	LKKRQSLPASIRPRLSTGSELSPKSKARPSS	1318.3	1589.3	390.05	1565.1	545.5	1501.8	670.06	1192.4
A2AJI0	460	A2AJI0	A2AJI0	MAP7 domain-containing protein 1	Map7d1	sp|A2AJI0|MA7D1_MOUSE MAP7 domain-containing protein 1 OS=Mus musculus OX=10090 GN=Map7d1 PE=1 SV=1	0.999717	35.4974	4.57e-32	184.27	142.27	124.67	0.999717	35.4974	6.82e-06	124.67	0.998412	29.2663	4.57e-32	184.27		1	S	LPASIRPRLSTGSELSPKSKARPSSPSTTWH	2156.8	3602.9	1198.1	2548.1	1742	2218.3	1347.3	1674.3
A2AJI0	78	A2AJI0	A2AJI0	MAP7 domain-containing protein 1	Map7d1	sp|A2AJI0|MA7D1_MOUSE MAP7 domain-containing protein 1 OS=Mus musculus OX=10090 GN=Map7d1 PE=1 SV=1	0.96346	14.2177	9.23e-13	75.717	68.051	75.717					0.96346	14.2177	9.23e-13	75.717		1	S	PKQLPLEPGNPTGQISPQPAPPQEECPSSEA	0	0	0	0	0	0	0	0
A2AJI0	114	A2AJI0	A2AJI0	MAP7 domain-containing protein 1	Map7d1	sp|A2AJI0|MA7D1_MOUSE MAP7 domain-containing protein 1 OS=Mus musculus OX=10090 GN=Map7d1 PE=1 SV=1	0.517029	0.768014	5.5e-16	142.32	117.52	105.38	0.517029	0.768014	5.5e-16	142.32	0.496745	0	1.16e-07	119.8		2	S	TPTATGPREAKPSRRSSQPSPTTVPASDSPP	0	0	0	0	0	0	0	0
A2AJI0	115	A2AJI0	A2AJI0	MAP7 domain-containing protein 1	Map7d1	sp|A2AJI0|MA7D1_MOUSE MAP7 domain-containing protein 1 OS=Mus musculus OX=10090 GN=Map7d1 PE=1 SV=1	0.998519	28.2887	0	342.31	303.05	342.31	0.998519	28.2887	0	342.31	0.997754	26.6149	4.38e-100	238.69		1;2	S	PTATGPREAKPSRRSSQPSPTTVPASDSPPA	8638.1	11521	5165.6	8565.6	7068.3	9617.7	5919.8	7681
A2AJI0	118	A2AJI0	A2AJI0	MAP7 domain-containing protein 1	Map7d1	sp|A2AJI0|MA7D1_MOUSE MAP7 domain-containing protein 1 OS=Mus musculus OX=10090 GN=Map7d1 PE=1 SV=1	0.914148	14.4081	4.52e-31	167.92	134.61	144.68	0.909382	10.5223	3.11e-06	108.56	0.914148	14.4081	4.52e-31	167.92		1;2	S	TGPREAKPSRRSSQPSPTTVPASDSPPAKQD	0	0	0	0	0	0	0	0
A2AJI0	125	A2AJI0	A2AJI0	MAP7 domain-containing protein 1	Map7d1	sp|A2AJI0|MA7D1_MOUSE MAP7 domain-containing protein 1 OS=Mus musculus OX=10090 GN=Map7d1 PE=1 SV=1	0.838368	7.24012	1.08e-05	99.451	80.376	99.451	0.838368	7.24012	1.08e-05	99.451						1	S	PSRRSSQPSPTTVPASDSPPAKQDVKKAGER	554.76	600.65	163.63	510.03	501.7	366.48	590.18	557.27
A2AJI0	127	A2AJI0	A2AJI0	MAP7 domain-containing protein 1	Map7d1	sp|A2AJI0|MA7D1_MOUSE MAP7 domain-containing protein 1 OS=Mus musculus OX=10090 GN=Map7d1 PE=1 SV=1	0.974714	15.8606	3.93e-07	115.31	96.479	115.31					0.974714	15.8606	3.93e-07	115.31		1	S	RRSSQPSPTTVPASDSPPAKQDVKKAGERHK	0	0	0	0	0	0	0	0
A2AJI0	275	A2AJI0	A2AJI0	MAP7 domain-containing protein 1	Map7d1	sp|A2AJI0|MA7D1_MOUSE MAP7 domain-containing protein 1 OS=Mus musculus OX=10090 GN=Map7d1 PE=1 SV=1	0.971303	15.3118	9.5e-09	118.76	102.18	117.2	0.971303	15.3118	9.5e-09	117.2	0.962146	14.1645	9.57e-09	118.76		1	S	LPKHVDSIINKRLSKSSATLWNSPSRNRSLQ	1292.9	1450.5	457.01	1278.8	1220.4	1521.6	1176.8	1156.5
A2AJI0	282	A2AJI0	A2AJI0	MAP7 domain-containing protein 1	Map7d1	sp|A2AJI0|MA7D1_MOUSE MAP7 domain-containing protein 1 OS=Mus musculus OX=10090 GN=Map7d1 PE=1 SV=1	0.99789	26.7703	0.000193367	82.171	64.804	82.171	0.977904	16.5748	0.025106	45.915	0.99789	26.7703	0.000193367	82.171		1	S	IINKRLSKSSATLWNSPSRNRSLQLSAWESS	1609.4	2071.1	793.07	1637.4	1090.9	1450.5	797.4	1235.2
A2AJT4	211	A2AJT4	A2AJT4	Arginine/serine-rich protein PNISR	Pnisr	sp|A2AJT4|PNISR_MOUSE Arginine/serine-rich protein PNISR OS=Mus musculus OX=10090 GN=Pnisr PE=1 SV=1	1	61.4352	2.84e-05	121.01	89.079	61.435	1	61.4352	0.00274184	61.435	1	121.013	2.84e-05	121.01		1	S	QNRRERPPSFRDRQRSPIALPVKQEPPQIDA	527.87	509.87	0	487.25	350.2	280.27	302.8	340.89
A2AKX3	2595	A2AKX3	A2AKX3	Probable helicase senataxin	Setx	sp|A2AKX3|SETX_MOUSE Probable helicase senataxin OS=Mus musculus OX=10090 GN=Setx PE=1 SV=1	0.996892	25.0623	0.0118362	42.568	9.8344	42.568					0.996892	25.0623	0.0118362	42.568		1	S	PAHPAAAASTSKRKYSDPDAGLSHKREPRAF	0	0	0	0	0	0	0	0
A2ALI5	260	A2ALI5	A2ALI5	Adherens junction-associated protein 1	Ajap1	sp|A2ALI5|AJAP1_MOUSE Adherens junction-associated protein 1 OS=Mus musculus OX=10090 GN=Ajap1 PE=2 SV=1	0.224015	0.521726	0.00492464	42.382	20.055	42.382	0.224015	0.521726	0.00492464	42.382							S	WKRTPVGVSTTEPSTSPSSNGKDIQPPRILG	0	0	0	0	0	0	0	0
A2ALI5	263	A2ALI5	A2ALI5	Adherens junction-associated protein 1	Ajap1	sp|A2ALI5|AJAP1_MOUSE Adherens junction-associated protein 1 OS=Mus musculus OX=10090 GN=Ajap1 PE=2 SV=1	0.983292	18.3393	0.00492464	42.382	20.055	42.382	0.983292	18.3393	0.00492464	42.382						2	S	TPVGVSTTEPSTSPSSNGKDIQPPRILGETS	0	0	0	0	0	0	0	0
A2ALK8	359	A2ALK8	A2ALK8	Tyrosine-protein phosphatase non-receptor type 3	Ptpn3	sp|A2ALK8|PTN3_MOUSE Tyrosine-protein phosphatase non-receptor type 3 OS=Mus musculus OX=10090 GN=Ptpn3 PE=1 SV=1	0.982655	17.5323	0.000124451	93.011	75.685	93.011	0.982655	17.5323	0.000124451	93.011						1	S	VIGGMVWNPVMRRSLSVERLETKSLPSRSPP	4239.5	4056.5	3806.5	5863.1	646.84	5552.8	1641	3362.3
A2ALK8	459	A2ALK8	A2ALK8	Tyrosine-protein phosphatase non-receptor type 3	Ptpn3	sp|A2ALK8|PTN3_MOUSE Tyrosine-protein phosphatase non-receptor type 3 OS=Mus musculus OX=10090 GN=Ptpn3 PE=1 SV=1	0.835973	8.78483	1.18e-07	85.808	69.686	85.808	0.835973	8.78483	1.18e-07	85.808						1	S	NPAQSCLTQKSSSSVSPSSNAPGSCSPDGVD	214.22	135.81	150.86	230.95	0	197.94	0	0
A2ALK8	467	A2ALK8	A2ALK8	Tyrosine-protein phosphatase non-receptor type 3	Ptpn3	sp|A2ALK8|PTN3_MOUSE Tyrosine-protein phosphatase non-receptor type 3 OS=Mus musculus OX=10090 GN=Ptpn3 PE=1 SV=1	0.477319	0	5.87e-06	69.92	60.637	69.92	0.477319	0	5.87e-06	69.92							S	QKSSSSVSPSSNAPGSCSPDGVDQRFLEDYH	0	0	0	0	0	0	0	0
A2ALK8	469	A2ALK8	A2ALK8	Tyrosine-protein phosphatase non-receptor type 3	Ptpn3	sp|A2ALK8|PTN3_MOUSE Tyrosine-protein phosphatase non-receptor type 3 OS=Mus musculus OX=10090 GN=Ptpn3 PE=1 SV=1	0.755107	5.59952	5.87e-06	69.92	60.637	45.611	0.755107	5.59952	5.87e-06	69.92						1	S	SSSSVSPSSNAPGSCSPDGVDQRFLEDYHKV	0	117.98	0	113.92	0	214.58	187.34	115.19
A2ALS5	484	A2ALS5	A2ALS5	Rap1 GTPase-activating protein 1	Rap1gap	sp|A2ALS5|RPGP1_MOUSE Rap1 GTPase-activating protein 1 OS=Mus musculus OX=10090 GN=Rap1gap PE=1 SV=2	0.961788	14.1087	0.000334991	80.3	55.447	70.96					0.961788	14.1087	0.000334991	80.3		1	S	DLAKAAGISLIVPGKSPTRKKSGPFGSRRSS	0	0	0	0	0	0	0	0
A2ALS5	460	A2ALS5	A2ALS5	Rap1 GTPase-activating protein 1	Rap1gap	sp|A2ALS5|RPGP1_MOUSE Rap1 GTPase-activating protein 1 OS=Mus musculus OX=10090 GN=Rap1gap PE=1 SV=2	0.936412	14.3387	8.5e-08	89.565	71.021	89.565					0.936412	14.3387	8.5e-08	89.565		1	S	MGLSNKKPNTVSTSHSGSFTPNNPDLAKAAG	0	0	0	0	0	0	0	0
A2ALS5	498	A2ALS5	A2ALS5	Rap1 GTPase-activating protein 1	Rap1gap	sp|A2ALS5|RPGP1_MOUSE Rap1 GTPase-activating protein 1 OS=Mus musculus OX=10090 GN=Rap1gap PE=1 SV=2	0.5	0	0.000269475	89.466	66.549	89.466	0.5	0	0.000360797	89.466	0.5	0	0.000269475	75.97		1	S	KSPTRKKSGPFGSRRSSAIGIENIQEVQEKR	216.49	849.09	222.7	406.89	396.52	1204.5	566.34	612.87
A2ALS5	499	A2ALS5	A2ALS5	Rap1 GTPase-activating protein 1	Rap1gap	sp|A2ALS5|RPGP1_MOUSE Rap1 GTPase-activating protein 1 OS=Mus musculus OX=10090 GN=Rap1gap PE=1 SV=2	0.999078	30.347	1.32e-109	245.25	201.93	245.25	0.973502	15.6512	5.57e-32	168.4	0.999078	30.347	1.32e-109	245.25		1	S	SPTRKKSGPFGSRRSSAIGIENIQEVQEKRE	3979.3	12957	2088.3	6868.3	4505.8	18056	7703.2	9479.8
A2ALS5	541	A2ALS5	A2ALS5	Rap1 GTPase-activating protein 1	Rap1gap	sp|A2ALS5|RPGP1_MOUSE Rap1 GTPase-activating protein 1 OS=Mus musculus OX=10090 GN=Rap1gap PE=1 SV=2	0.563431	1.58486	0.000354349	89.301	64.919	70.529	0.474117	0	0.000354349	89.301	0.563431	1.58486	0.000611102	70.529		1	S	GHVSQEPKSENSSTQSSPEMPTTKNRVESAA	0	0	0	0	0	0	0	0
A2ALS5	542	A2ALS5	A2ALS5	Rap1 GTPase-activating protein 1	Rap1gap	sp|A2ALS5|RPGP1_MOUSE Rap1 GTPase-activating protein 1 OS=Mus musculus OX=10090 GN=Rap1gap PE=1 SV=2	0.813051	6.71742	1.31e-09	122.33	104.52	64.2	0.813051	6.71742	1.31e-09	122.33	0.667834	3.12889	8.43e-06	109.55		1	S	HVSQEPKSENSSTQSSPEMPTTKNRVESAAQ	2811	5160.1	2845.2	3637.9	4241.2	4464.1	3621.1	3725.8
A2ALS5	439	A2ALS5	A2ALS5	Rap1 GTPase-activating protein 1	Rap1gap	sp|A2ALS5|RPGP1_MOUSE Rap1 GTPase-activating protein 1 OS=Mus musculus OX=10090 GN=Rap1gap PE=1 SV=2	0.575069	1.33218	0.0165999	47.938	34.958	47.938					0.575069	1.33218	0.0165999	47.938		1	S	GGGFFESFKRVIRSRSQSMDAMGLSNKKPNT	0	0	0	0	0	0	0	0
A2ALS5	441	A2ALS5	A2ALS5	Rap1 GTPase-activating protein 1	Rap1gap	sp|A2ALS5|RPGP1_MOUSE Rap1 GTPase-activating protein 1 OS=Mus musculus OX=10090 GN=Rap1gap PE=1 SV=2	0.962139	14.3317	1.12e-18	160.47	110.97	43.308	0.95651	14.4706	1.12e-18	160.47	0.962139	14.3317	0.00149717	71.879		1	S	GFFESFKRVIRSRSQSMDAMGLSNKKPNTVS	4970.2	8725.1	4120.6	4220.5	4899.9	8661.8	3990.2	7406
A2ALS5	566	A2ALS5	A2ALS5	Rap1 GTPase-activating protein 1	Rap1gap	sp|A2ALS5|RPGP1_MOUSE Rap1 GTPase-activating protein 1 OS=Mus musculus OX=10090 GN=Rap1gap PE=1 SV=2	0.999876	39.069	0.0474647	40.045	34.218	40.045	0.999876	39.069	0.0474647	40.045						1	S	RVESAAQRTEVLQGFSRSSSSASSFTSVVEE	289.01	656.8	295.9	380.52	518.49	303.3	356.93	342.41
A2ALU4	235	A2ALU4	A2ALU4	Protein Shroom2	Shroom2	sp|A2ALU4|SHRM2_MOUSE Protein Shroom2 OS=Mus musculus OX=10090 GN=Shroom2 PE=1 SV=1	0.545927	1.13936	9.72e-06	98.353	56.353	98.353	0.545927	1.13936	9.72e-06	98.353	0.472676	0	0.0136945	48.004		1	S	TCSSTPDHTLPKADASSTENILYKVGLWEAS	1031.8	969.73	707	1039.9	551.37	677.4	726.66	663.25
A2ALU4	236	A2ALU4	A2ALU4	Protein Shroom2	Shroom2	sp|A2ALU4|SHRM2_MOUSE Protein Shroom2 OS=Mus musculus OX=10090 GN=Shroom2 PE=1 SV=1	0.472676	0	0.0136945	48.004	27.102	48.004					0.472676	0	0.0136945	48.004			S	CSSTPDHTLPKADASSTENILYKVGLWEASR	0	0	0	0	0	0	0	0
A2ALU4	1164	A2ALU4	A2ALU4	Protein Shroom2	Shroom2	sp|A2ALU4|SHRM2_MOUSE Protein Shroom2 OS=Mus musculus OX=10090 GN=Shroom2 PE=1 SV=1	0.383799	0.943673	0.00405279	56.205	43.678	56.205					0.383799	0.943673	0.00405279	56.205			S	PRPPSTPAPPVRDSCSSPPSLNYGKAKEKTM	0	0	0	0	0	0	0	0
A2ALU4	1165	A2ALU4	A2ALU4	Protein Shroom2	Shroom2	sp|A2ALU4|SHRM2_MOUSE Protein Shroom2 OS=Mus musculus OX=10090 GN=Shroom2 PE=1 SV=1	0.978465	16.6606	2.57e-17	149.23	125.14	149.23	0.978465	16.6606	2.57e-17	149.23						1	S	RPPSTPAPPVRDSCSSPPSLNYGKAKEKTMD	13191	19350	11725	13599	13924	15130	13121	14058
A2ALU4	1041	A2ALU4	A2ALU4	Protein Shroom2	Shroom2	sp|A2ALU4|SHRM2_MOUSE Protein Shroom2 OS=Mus musculus OX=10090 GN=Shroom2 PE=1 SV=1	0.94532	12.3775	6.3e-06	108.68	66.644	59.739	0.94532	12.3775	6.3e-06	108.68	0.5	0	9.01e-06	106.11		1	S	SKCQHLQTSAMETSRSPSPQFAPQKLTDKPP	11107	14672	8791.3	11600	7420.8	11018	6749.4	9329
A2ALU4	1043	A2ALU4	A2ALU4	Protein Shroom2	Shroom2	sp|A2ALU4|SHRM2_MOUSE Protein Shroom2 OS=Mus musculus OX=10090 GN=Shroom2 PE=1 SV=1	0.693618	3.54857	6.3e-06	108.68	66.644	69.815	0.5	0	6.3e-06	108.68	0.693618	3.54857	9.01e-06	106.11		1	S	CQHLQTSAMETSRSPSPQFAPQKLTDKPPLL	5182.7	7352	4636.7	6096.5	3690	5991.2	3177.5	5361.6
A2ALU4	957	A2ALU4	A2ALU4	Protein Shroom2	Shroom2	sp|A2ALU4|SHRM2_MOUSE Protein Shroom2 OS=Mus musculus OX=10090 GN=Shroom2 PE=1 SV=1	0.296586	0	5.02e-05	70.569	59.046	70.569					0.296586	0	5.02e-05	70.569			S	AGLDQQQRPQYIHERSRSSPSTDHYSQEVPV	0	0	0	0	0	0	0	0
A2ALU4	959	A2ALU4	A2ALU4	Protein Shroom2	Shroom2	sp|A2ALU4|SHRM2_MOUSE Protein Shroom2 OS=Mus musculus OX=10090 GN=Shroom2 PE=1 SV=1	0.296586	0	5.02e-05	70.569	59.046	70.569					0.296586	0	5.02e-05	70.569			S	LDQQQRPQYIHERSRSSPSTDHYSQEVPVEP	0	0	0	0	0	0	0	0
A2ALU4	960	A2ALU4	A2ALU4	Protein Shroom2	Shroom2	sp|A2ALU4|SHRM2_MOUSE Protein Shroom2 OS=Mus musculus OX=10090 GN=Shroom2 PE=1 SV=1	0.296586	0	5.02e-05	70.569	59.046	70.569					0.296586	0	5.02e-05	70.569			S	DQQQRPQYIHERSRSSPSTDHYSQEVPVEPN	0	0	0	0	0	0	0	0
A2AN08	619	A2AN08	A2AN08	E3 ubiquitin-protein ligase UBR4	Ubr4	sp|A2AN08|UBR4_MOUSE E3 ubiquitin-protein ligase UBR4 OS=Mus musculus OX=10090 GN=Ubr4 PE=1 SV=1	0.5	0	0.000715213	60.55	42.238	47.666	0.5	0	0.00377399	47.666	0.5	0	0.000715213	60.55		1	S	EKAAPPPPPPPPPLESSPRVKSPNKQASGEK	615.87	1050.9	754.05	839.99	626.18	685.11	325.81	918.73
A2AN08	620	A2AN08	A2AN08	E3 ubiquitin-protein ligase UBR4	Ubr4	sp|A2AN08|UBR4_MOUSE E3 ubiquitin-protein ligase UBR4 OS=Mus musculus OX=10090 GN=Ubr4 PE=1 SV=1	0.5	0	0.000715213	60.55	42.238	47.666	0.5	0	0.00377399	47.666	0.5	0	0.000715213	60.55		1	S	KAAPPPPPPPPPLESSPRVKSPNKQASGEKG	615.87	1050.9	754.05	839.99	626.18	685.11	325.81	918.73
A2AN08	178	A2AN08	A2AN08	E3 ubiquitin-protein ligase UBR4	Ubr4	sp|A2AN08|UBR4_MOUSE E3 ubiquitin-protein ligase UBR4 OS=Mus musculus OX=10090 GN=Ubr4 PE=1 SV=1	0.999648	34.5349	1.76e-33	189.41	144.05	189.41	0.93371	11.4877	9.19e-09	122.33	0.999648	34.5349	1.76e-33	189.41		1	S	TVKTLSDVEDQKELASPVSPELRQKEVQMNF	1571.5	2082.7	239.14	1602.2	1091.6	1997.8	1276.2	1707.6
A2AN08	181	A2AN08	A2AN08	E3 ubiquitin-protein ligase UBR4	Ubr4	sp|A2AN08|UBR4_MOUSE E3 ubiquitin-protein ligase UBR4 OS=Mus musculus OX=10090 GN=Ubr4 PE=1 SV=1	0.999998	56.6273	5.42e-13	147.28	108.41	147.28	0.999016	30.0654	8.56e-06	100.55	0.999998	56.6273	5.42e-13	147.28		1	S	TLSDVEDQKELASPVSPELRQKEVQMNFLNQ	366.89	567.31	100.36	194.73	280	439.63	332.37	488.98
A2AN08	2716	A2AN08	A2AN08	E3 ubiquitin-protein ligase UBR4	Ubr4	sp|A2AN08|UBR4_MOUSE E3 ubiquitin-protein ligase UBR4 OS=Mus musculus OX=10090 GN=Ubr4 PE=1 SV=1	0.998847	29.3784	7.67e-11	155.11	113.24	155.11	0.99614	24.1189	1.16e-10	153.97	0.998847	29.3784	7.67e-11	155.11		1	S	VLRPRNKRRHVTLPSSPRSNTPMGDKDDDDD	4475.8	8281.2	4719.4	5285	4521.6	4042.7	3652.6	5368.2
A2AN08	362	A2AN08	A2AN08	E3 ubiquitin-protein ligase UBR4	Ubr4	sp|A2AN08|UBR4_MOUSE E3 ubiquitin-protein ligase UBR4 OS=Mus musculus OX=10090 GN=Ubr4 PE=1 SV=1	0.238322	0	0.00222972	41.084	29.667	41.084	0.238322	0	0.00222972	41.084							S	MAILHVGSAQQVRTGSTSSKEDDYESDAATI	0	0	0	0	0	0	0	0
A2AN08	364	A2AN08	A2AN08	E3 ubiquitin-protein ligase UBR4	Ubr4	sp|A2AN08|UBR4_MOUSE E3 ubiquitin-protein ligase UBR4 OS=Mus musculus OX=10090 GN=Ubr4 PE=1 SV=1	0.202797	0	0.000428347	50.215	34.272	50.215					0.202797	0	0.000428347	50.215			S	ILHVGSAQQVRTGSTSSKEDDYESDAATIVQ	0	0	0	0	0	0	0	0
A2AN08	365	A2AN08	A2AN08	E3 ubiquitin-protein ligase UBR4	Ubr4	sp|A2AN08|UBR4_MOUSE E3 ubiquitin-protein ligase UBR4 OS=Mus musculus OX=10090 GN=Ubr4 PE=1 SV=1	0.202797	0	0.000428347	50.215	34.272	50.215					0.202797	0	0.000428347	50.215			S	LHVGSAQQVRTGSTSSKEDDYESDAATIVQK	0	0	0	0	0	0	0	0
A2AN08	2882	A2AN08	A2AN08	E3 ubiquitin-protein ligase UBR4	Ubr4	sp|A2AN08|UBR4_MOUSE E3 ubiquitin-protein ligase UBR4 OS=Mus musculus OX=10090 GN=Ubr4 PE=1 SV=1	0.5	0	6.72e-188	267.26	246.52	267.26	0.5	0	6.72e-188	267.26	0.499985	0	2.02e-164	253.88		1	S	DEGSTAATDGSTLRTSPADHGGSVGSESGGS	252.7	729.43	419.97	224.08	1187.6	393.55	463.71	530.67
A2AP18	708	A2AP18	A2AP18	1-phosphatidylinositol 4
A2AP18	1047	A2AP18	A2AP18	1-phosphatidylinositol 4
A2AP18	1048	A2AP18	A2AP18	1-phosphatidylinositol 4
A2AP18	987	A2AP18	A2AP18	1-phosphatidylinositol 4
A2AP18	990	A2AP18	A2AP18	1-phosphatidylinositol 4
A2AP18	676	A2AP18	A2AP18	1-phosphatidylinositol 4
A2APV2	183	A2APV2	A2APV2	Formin-like protein 2	Fmnl2	sp|A2APV2|FMNL2_MOUSE Formin-like protein 2 OS=Mus musculus OX=10090 GN=Fmnl2 PE=1 SV=2	0.851349	12.1857	0.01402	43.184	31.137	43.184	0.851349	12.1857	0.01402	43.184						1	S	WSRSIEDLHRGSNLPSPVGNSVSRSGRHSAL	840.04	1006.7	416.92	577.85	534.36	586.98	293.21	661.92
A2APV2	171	A2APV2	A2APV2	Formin-like protein 2	Fmnl2	sp|A2APV2|FMNL2_MOUSE Formin-like protein 2 OS=Mus musculus OX=10090 GN=Fmnl2 PE=1 SV=2	1	124.08	5.14e-05	124.08	90.565	124.08	1	124.08	5.14e-05	124.08						1	S	STMESTVDKSKPWSRSIEDLHRGSNLPSPVG	2706.8	3917.9	1676.4	2326.9	2062.2	2447.7	1085.1	2078.3
A2APX8;B1AWN6;A2ASI5	562;565;565	A2APX8;B1AWN6	B1AWN6	Sodium channel protein	Scn1a;Scn2a1;Scn3a	sp|A2APX8|SCN1A_MOUSE Sodium channel protein type 1 subunit alpha OS=Mus musculus OX=10090 GN=Scn1a PE=1 SV=1;sp|B1AWN6|SCN2A_MOUSE Sodium channel protein type 2 subunit alpha OS=Mus musculus OX=10090 GN=Scn2a PE=1 SV=1;sp|A2ASI5|SCN3A_MOUSE Sodium channel	0.999857	38.4523	0.00817732	73.26	27.542	73.26	0.999857	38.4523	0.00817732	73.26						1	S	KRFSSPHQSLLSIRGSLFSPRRNSRASLFSF;KRYSSPHQSLLSIRGSLFSPRRNSRTSLFSF	128.65	291.55	220.64	119.5	472.69	264.45	135.07	280.05
A2APX8;B1AWN6;A2ASI5	565;568;568	A2APX8;B1AWN6	B1AWN6	Sodium channel protein	Scn1a;Scn2a1;Scn3a	sp|A2APX8|SCN1A_MOUSE Sodium channel protein type 1 subunit alpha OS=Mus musculus OX=10090 GN=Scn1a PE=1 SV=1;sp|B1AWN6|SCN2A_MOUSE Sodium channel protein type 2 subunit alpha OS=Mus musculus OX=10090 GN=Scn2a PE=1 SV=1;sp|A2ASI5|SCN3A_MOUSE Sodium channel	0.999997	54.6064	0.00619485	80.165	52.911	80.165					0.999997	54.6064	0.00619485	80.165		1	S	SSPHQSLLSIRGSLFSPRRNSRASLFSFKGR;SSPHQSLLSIRGSLFSPRRNSRTSLFSFRGR	0	0	0	0	0	0	0	0
A2APX8	1939	A2APX8	A2APX8	Sodium channel protein	Scn1a	sp|A2APX8|SCN1A_MOUSE Sodium channel protein type 1 subunit alpha OS=Mus musculus OX=10090 GN=Scn1a PE=1 SV=1	0.697978	3.63802	0.00189781	89.171	63.55	89.171					0.697978	3.63802	0.00189781	89.171		1	S	RAYRRHLLKRTVKQASFTYNKNKLKGGANLL	0	0	0	0	0	0	0	0
A2APX8	607	A2APX8	A2APX8	Sodium channel protein	Scn1a	sp|A2APX8|SCN1A_MOUSE Sodium channel protein type 1 subunit alpha OS=Mus musculus OX=10090 GN=Scn1a PE=1 SV=1	1	60.5185	0.00580025	94.692	57.216	60.518	1	60.5185	0.00580025	94.692						1	S	DDEHSTFEDNESRRDSLFVPRRHGERRNSNL	213.89	490.12	225.85	331.74	397.05	725.5	351.22	480.86
A2AQ25	1898	A2AQ25	A2AQ25	Sickle tail protein	Skt	sp|A2AQ25|SKT_MOUSE Sickle tail protein OS=Mus musculus OX=10090 GN=Skt PE=1 SV=1	0.586845	3.18546	1.4e-12	105.95	83.731	103.12					0.586845	3.18546	1.4e-12	105.95		1	S	LQTQNGRAAPTTSSSSSPPSPASPTSLNQGA	0	0	0	0	0	0	0	0
A2AQ25	1899	A2AQ25	A2AQ25	Sickle tail protein	Skt	sp|A2AQ25|SKT_MOUSE Sickle tail protein OS=Mus musculus OX=10090 GN=Skt PE=1 SV=1	0.961168	15.7771	1.02e-53	185.85	159.01	171.21	0.961168	15.7771	1.02e-53	185.85	0.443401	0	1.6e-12	105.95		1;2	S	QTQNGRAAPTTSSSSSPPSPASPTSLNQGAR	1735.9	1521.1	1705.9	1227.8	1994.2	1495.5	1582.7	1631.6
A2AQ25	1902	A2AQ25	A2AQ25	Sickle tail protein	Skt	sp|A2AQ25|SKT_MOUSE Sickle tail protein OS=Mus musculus OX=10090 GN=Skt PE=1 SV=1	0.725373	6.77168	1.02e-53	185.85	159.01	42.973	0.725373	6.77168	1.02e-53	185.85						1;2	S	NGRAAPTTSSSSSPPSPASPTSLNQGARGIR	300.87	435.55	347.13	236.7	248.32	186.16	223.54	387.11
A2AQ25	1905	A2AQ25	A2AQ25	Sickle tail protein	Skt	sp|A2AQ25|SKT_MOUSE Sickle tail protein OS=Mus musculus OX=10090 GN=Skt PE=1 SV=1	0.869216	9.3936	1.86e-20	137.42	129.33	137.42	0.869216	9.3936	1.86e-20	137.42	0.675286	7.05369	0.00116442	43.534		1;2	S	AAPTTSSSSSPPSPASPTSLNQGARGIRTIH	0	0	0	0	0	0	0	0
A2AQ25	1868	A2AQ25	A2AQ25	Sickle tail protein	Skt	sp|A2AQ25|SKT_MOUSE Sickle tail protein OS=Mus musculus OX=10090 GN=Skt PE=1 SV=1	1	43.2819	0.0377221	43.282	27.71	43.282	1	43.2819	0.0377221	43.282						1	S	ASLIPSVSNGSLKFQSPPHAGKGHHHLSFAL	1094.7	1380.8	304.77	935.36	636.86	1170.4	817.43	991.96
A2AQ25	1035	A2AQ25	A2AQ25	Sickle tail protein	Skt	sp|A2AQ25|SKT_MOUSE Sickle tail protein OS=Mus musculus OX=10090 GN=Skt PE=1 SV=1	0.89208	9.84236	1.19e-07	85.489	71.179	85.489	0.89208	9.84236	1.19e-07	85.489						1	S	SKGDAAGDKLELSEDSPNSEQELDKIGGKSP	2403.6	3673.1	1100.2	2522.4	2924	2921.2	3140.7	2466.3
A2AQ25	866	A2AQ25	A2AQ25	Sickle tail protein	Skt	sp|A2AQ25|SKT_MOUSE Sickle tail protein OS=Mus musculus OX=10090 GN=Skt PE=1 SV=1	0.402193	0.878773	1.23e-06	75.717	59.184	75.717	0.402193	0.878773	1.23e-06	75.717	0.355964	0.344006	1.36e-05	60.176			S	HQEETAHAPGQPLHCSTGSPGDVKSEVVPLS	0	0	0	0	0	0	0	0
A2AQ25	869	A2AQ25	A2AQ25	Sickle tail protein	Skt	sp|A2AQ25|SKT_MOUSE Sickle tail protein OS=Mus musculus OX=10090 GN=Skt PE=1 SV=1	0.333333	0	1.88e-06	69.356	53.716	69.356	0.333333	0	1.88e-06	69.356	0.333331	0	1.36e-05	60.176			S	ETAHAPGQPLHCSTGSPGDVKSEVVPLSTMT	0	0	0	0	0	0	0	0
A2AQ25	1647	A2AQ25	A2AQ25	Sickle tail protein	Skt	sp|A2AQ25|SKT_MOUSE Sickle tail protein OS=Mus musculus OX=10090 GN=Skt PE=1 SV=1	0.999997	55.5198	1.55e-15	142.91	123.59	137.89	0.999997	55.5198	1.55e-15	142.91	0.995477	23.6365	0.0155542	54.598		1	S	PEDALKTMARRQEQLSPEGTLPASRTDEIRK	1292.6	2141.1	1703.8	1549.7	1116.8	2189.8	1416.5	1642.2
A2AQ25	359	A2AQ25	A2AQ25	Sickle tail protein	Skt	sp|A2AQ25|SKT_MOUSE Sickle tail protein OS=Mus musculus OX=10090 GN=Skt PE=1 SV=1	0.99861	29.2544	8.84e-09	110.31	70.681	51.013	0.97076	15.212	8.84e-09	110.31	0.99861	29.2544	0.00844986	51.013		1	S	ATIPRDRLSSLPVSRSISPSPSAILERRDVK	266.55	1575.8	554.76	934.3	515.73	1481.1	574.85	969.13
A2AQ25	361	A2AQ25	A2AQ25	Sickle tail protein	Skt	sp|A2AQ25|SKT_MOUSE Sickle tail protein OS=Mus musculus OX=10090 GN=Skt PE=1 SV=1	0.893602	9.73143	0.00553354	57.019	20.686	57.019	0.893602	9.73143	0.00553354	57.019						1	S	IPRDRLSSLPVSRSISPSPSAILERRDVKPD	0	358.05	187.43	301.6	0	164.5	304.59	239.69
A2AQ25	363	A2AQ25	A2AQ25	Sickle tail protein	Skt	sp|A2AQ25|SKT_MOUSE Sickle tail protein OS=Mus musculus OX=10090 GN=Skt PE=1 SV=1	0.630346	3.51912	0.00110577	74.76	42.752	74.76					0.630346	3.51912	0.00110577	74.76		1	S	RDRLSSLPVSRSISPSPSAILERRDVKPDED	0	0	0	0	0	0	0	0
A2AQ25	169	A2AQ25	A2AQ25	Sickle tail protein	Skt	sp|A2AQ25|SKT_MOUSE Sickle tail protein OS=Mus musculus OX=10090 GN=Skt PE=1 SV=1	0.884094	8.82394	0.000539018	84.169	26.943	48.741	0.554067	0.942928	0.000539018	84.169	0.884094	8.82394	0.0108605	48.741		1	S	GEVPSPFARGSRTRASLPVVRSANQTKERSL	1429.2	1970.4	1142.6	1908.9	776.66	1782.4	763.25	1367.3
A2AQ25	1087	A2AQ25	A2AQ25	Sickle tail protein	Skt	sp|A2AQ25|SKT_MOUSE Sickle tail protein OS=Mus musculus OX=10090 GN=Skt PE=1 SV=1	0.983465	17.7726	3.41e-05	101.39	83.526	101.39	0.983465	17.7726	3.41e-05	101.39						1	S	SGDVVYTGRSMSKVSSEDPGPTPQTRATKCP	1281.7	3369.8	929.11	2365	1373.7	2490.9	1220.8	1689.8
A2ARP1	959	A2ARP1	A2ARP1	Inositol hexakisphosphate and diphosphoinositol-pentakisphosphate kinase 1	Ppip5k1	sp|A2ARP1|VIP1_MOUSE Inositol hexakisphosphate and diphosphoinositol-pentakisphosphate kinase 1 OS=Mus musculus OX=10090 GN=Ppip5k1 PE=1 SV=1	0.810242	6.42401	1.82e-30	164.66	137.25	48.741	0.810242	6.42401	0.00384969	48.741	0.5	0	1.82e-30	164.66		1	S	CPGKASDEPDRALQTSPQPVEGTGLPRRSPL	433.96	931.03	563.64	605.23	598.03	481.78	580.62	671.27
A2ARP1	1234	A2ARP1	A2ARP1	Inositol hexakisphosphate and diphosphoinositol-pentakisphosphate kinase 1	Ppip5k1	sp|A2ARP1|VIP1_MOUSE Inositol hexakisphosphate and diphosphoinositol-pentakisphosphate kinase 1 OS=Mus musculus OX=10090 GN=Ppip5k1 PE=1 SV=1	0.99992	42.0265	1.34e-10	85	71.812	85	0.999662	35.2491	1.55e-08	70.465	0.99992	42.0265	1.34e-10	85		1	S	ELHIERQQELVEPAQSPQELPVEICPSGSQG	0	185.86	86.36	191.15	112.77	122.59	267.22	135.22
A2ARP1	939	A2ARP1	A2ARP1	Inositol hexakisphosphate and diphosphoinositol-pentakisphosphate kinase 1	Ppip5k1	sp|A2ARP1|VIP1_MOUSE Inositol hexakisphosphate and diphosphoinositol-pentakisphosphate kinase 1 OS=Mus musculus OX=10090 GN=Ppip5k1 PE=1 SV=1	1	70.1847	5.68e-36	182.02	133.07	182.02					1	70.1847	5.68e-36	182.02		1	S	RPASSENEEMKTDPGSIENLCPGKASDEPDR	0	0	0	0	0	0	0	0
A2ARP1	1147	A2ARP1	A2ARP1	Inositol hexakisphosphate and diphosphoinositol-pentakisphosphate kinase 1	Ppip5k1	sp|A2ARP1|VIP1_MOUSE Inositol hexakisphosphate and diphosphoinositol-pentakisphosphate kinase 1 OS=Mus musculus OX=10090 GN=Ppip5k1 PE=1 SV=1	0.999858	38.4748	2.4e-05	97.734	54.707	73.435	0.999528	33.2591	2.4e-05	97.734	0.999858	38.4748	0.000176228	94.465		1	S	HQASDSPFSPPRTLHSPPLQLRHRSEKPPWY	2250	2627.7	1873.8	1779.8	1793.9	2481.7	2030.8	2634.3
A2ARS0	193	A2ARS0	A2ARS0	Ankyrin repeat domain-containing protein 63	Ankrd63	sp|A2ARS0|ANR63_MOUSE Ankyrin repeat domain-containing protein 63 OS=Mus musculus OX=10090 GN=Ankrd63 PE=1 SV=1	0.841668	10.1222	0.000186361	67.449	54.468	56.149	0.841668	10.1222	0.000186361	67.449						1;2	S	GRAAAAAAARGSNSDSPPGHPAPAPSPERRR	238.79	273.88	83.485	315.07	444.14	445.58	468.23	174.7
A2ARS0	203	A2ARS0	A2ARS0	Ankyrin repeat domain-containing protein 63	Ankrd63	sp|A2ARS0|ANR63_MOUSE Ankyrin repeat domain-containing protein 63 OS=Mus musculus OX=10090 GN=Ankrd63 PE=1 SV=1	0.997225	26.8656	0.00327249	56.149	37.553	45.901	0.997225	26.8656	0.00327249	56.149						2	S	GSNSDSPPGHPAPAPSPERRRPSPRRLPRPL	0	0	0	0	0	0	0	0
A2ARV4	4624	A2ARV4	A2ARV4	Low-density lipoprotein receptor-related protein 2	Lrp2	sp|A2ARV4|LRP2_MOUSE Low-density lipoprotein receptor-related protein 2 OS=Mus musculus OX=10090 GN=Lrp2 PE=1 SV=1	0.893915	9.25644	0.000231018	93.823	75.959	93.823					0.893915	9.25644	0.000231018	93.823		1	S	MDTEQKEAVAVAPPPSPSLPAKASKRSSTPG	0	0	0	0	0	0	0	0
A2ASS6	10602	A2ASS6	A2ASS6	Titin	Ttn	sp|A2ASS6|TITIN_MOUSE Titin OS=Mus musculus OX=10090 GN=Ttn PE=1 SV=1	0.83089	6.91386	0.000918889	73.245	37.519	73.245	0.83089	6.91386	0.000918889	73.245	0.499989	0	0.00375737	62.044		1	S	PRPTKEVTVTEEKKWSYTREEETVSEHREEE	0	0	0	0	0	0	0	0
A2ATK9	358	A2ATK9	A2ATK9		Fam171a1	tr|A2ATK9|A2ATK9_MOUSE Family with sequence similarity 171
A2ATK9	360	A2ATK9	A2ATK9		Fam171a1	tr|A2ATK9|A2ATK9_MOUSE Family with sequence similarity 171
A2ATK9	849	A2ATK9	A2ATK9		Fam171a1	tr|A2ATK9|A2ATK9_MOUSE Family with sequence similarity 171
A2ATK9	824	A2ATK9	A2ATK9		Fam171a1	tr|A2ATK9|A2ATK9_MOUSE Family with sequence similarity 171
A2ATK9	443	A2ATK9	A2ATK9		Fam171a1	tr|A2ATK9|A2ATK9_MOUSE Family with sequence similarity 171
A2AU34	62	A2AU34	A2AU34		Tmem74b	tr|A2AU34|A2AU34_MOUSE Transmembrane protein 74B OS=Mus musculus OX=10090 GN=Tmem74b PE=1 SV=1	0.999905	42.5415	0.000156555	99.055	72.269	99.055	0.708109	6.85909	0.00601343	45.864	0.999905	42.5415	0.000156555	99.055		1	S	THFQNPGDARLGNAPSPPGGVPSLSRSQRDD	257.73	214.27	237.99	299.41	171.71	145.81	121.95	202.08
A2AU34	198	A2AU34	A2AU34		Tmem74b	tr|A2AU34|A2AU34_MOUSE Transmembrane protein 74B OS=Mus musculus OX=10090 GN=Tmem74b PE=1 SV=1	0.999929	41.4623	0.000413635	118.67	80.12	89.886	0.999929	41.4623	0.00159985	90.906	0.991334	20.5842	0.000413635	118.67		1	S	RQTFVPGRGSRKTYGSINLRMRQLTGDGGQV	3112.4	4322.8	1405.8	3481.9	2834.9	3529.8	2061.7	3140.2
A2AU72	649	A2AU72	A2AU72	Armadillo repeat-containing protein 3	Armc3	sp|A2AU72|ARMC3_MOUSE Armadillo repeat-containing protein 3 OS=Mus musculus OX=10090 GN=Armc3 PE=1 SV=1	0.854799	7.69894	0.00263973	64.65	49.5	64.65					0.854799	7.69894	0.00263973	64.65		1	S	SLRRGSKEKANAIFGSPTEEKSEPASVRNTI	0	0	0	0	0	0	0	0
A2AUP1	299	A2AUP1	A2AUP1		Pfkfb3	tr|A2AUP1|A2AUP1_MOUSE 6-phosphofructo-2-kinase/fructose-2
A2AUP1	303	A2AUP1	A2AUP1		Pfkfb3	tr|A2AUP1|A2AUP1_MOUSE 6-phosphofructo-2-kinase/fructose-2
A2AV25	11	A2AV25	A2AV25	Fibrinogen C domain-containing protein 1	Fibcd1	sp|A2AV25|FBCD1_MOUSE Fibrinogen C domain-containing protein 1 OS=Mus musculus OX=10090 GN=Fibcd1 PE=2 SV=1	0.812791	7.29606	0.0173379	52.576	30.378	52.576					0.812791	7.29606	0.0173379	52.576		1	S	_____MVHERWKTVGSASQLEDRPRDKPQRA	0	0	0	0	0	0	0	0
A2AWA9	42	A2AWA9	A2AWA9	Rab GTPase-activating protein 1	Rabgap1	sp|A2AWA9|RBGP1_MOUSE Rab GTPase-activating protein 1 OS=Mus musculus OX=10090 GN=Rabgap1 PE=1 SV=1	0.999981	48.0042	7.99e-31	163.51	123.48	163.51	0.999981	48.0042	7.99e-31	163.51						1	S	LVSRQGDETPSTNNGSDDEKTGLKIVGNGSE	934.32	1967.5	0	773.72	1040.4	1120.1	1046.5	1243.8
A2AWR3	739	A2AWR3	A2AWR3		Gpr155	sp|A2AWR3|LYCHS_MOUSE Lysosomal cholesterol signaling protein OS=Mus musculus OX=10090 GN=Gpr155 PE=2 SV=1	0.994685	22.7217	0.00621301	41.554	26.464	41.554					0.994685	22.7217	0.00621301	41.554		1	S	LEFLWNNKEAAADRESPVSEEIKMTCQQFVH	0	0	0	0	0	0	0	0
A2AWR3	859	A2AWR3	A2AWR3		Gpr155	sp|A2AWR3|LYCHS_MOUSE Lysosomal cholesterol signaling protein OS=Mus musculus OX=10090 GN=Gpr155 PE=2 SV=1	0.498483	0	0.00291413	51.695	31.032	51.695	0.498483	0	0.00291413	51.695	0.498483	0	0.00291413	51.695			S	TLRDHQEESYKEIGHSSPPSVSPKT______	0	0	0	0	0	0	0	0
A2AWR3	860	A2AWR3	A2AWR3		Gpr155	sp|A2AWR3|LYCHS_MOUSE Lysosomal cholesterol signaling protein OS=Mus musculus OX=10090 GN=Gpr155 PE=2 SV=1	0.561191	1.12008	0.00291413	51.695	31.032	42.633	0.498483	0	0.00291413	51.695	0.561191	1.12008	0.00291413	51.695		2	S	LRDHQEESYKEIGHSSPPSVSPKT_______	0	0	0	0	0	0	0	0
A2AWR3	863	A2AWR3	A2AWR3		Gpr155	sp|A2AWR3|LYCHS_MOUSE Lysosomal cholesterol signaling protein OS=Mus musculus OX=10090 GN=Gpr155 PE=2 SV=1	0.395893	1.99024	0.0192685	42.718	15.414	42.718	0.395893	1.99024	0.0192685	42.718							S	HQEESYKEIGHSSPPSVSPKT__________	0	0	0	0	0	0	0	0
A2AWR3	865	A2AWR3	A2AWR3		Gpr155	sp|A2AWR3|LYCHS_MOUSE Lysosomal cholesterol signaling protein OS=Mus musculus OX=10090 GN=Gpr155 PE=2 SV=1	0.638292	4.40606	0.00929776	42.633	31.687	42.633					0.638292	4.40606	0.00929776	42.633		2	S	EESYKEIGHSSPPSVSPKT____________	0	0	0	0	0	0	0	0
A2BH40	1866	A2BH40	A2BH40	AT-rich interactive domain-containing protein 1A	Arid1a	sp|A2BH40|ARI1A_MOUSE AT-rich interactive domain-containing protein 1A OS=Mus musculus OX=10090 GN=Arid1a PE=1 SV=1	1	84.4978	0.00511936	84.498	7.7306	84.498	1	84.4978	0.00511936	84.498	1	71.9951	0.0089096	71.995		1	S	EHIQTHFESKIELLPSRPYVPCPTPPRKHLT	4966.3	16782	4518.7	23910	2319	11281	5223.4	2289.5
A2BH40	770	A2BH40	A2BH40	AT-rich interactive domain-containing protein 1A	Arid1a	sp|A2BH40|ARI1A_MOUSE AT-rich interactive domain-containing protein 1A OS=Mus musculus OX=10090 GN=Arid1a PE=1 SV=1	0.469518	0	0.005564	43.024	31.048	43.024					0.469518	0	0.005564	43.024			S	QRNPQMPQYTSPQPGSALSPRQPSGGQMHSG	0	0	0	0	0	0	0	0
A2BH40	773	A2BH40	A2BH40	AT-rich interactive domain-containing protein 1A	Arid1a	sp|A2BH40|ARI1A_MOUSE AT-rich interactive domain-containing protein 1A OS=Mus musculus OX=10090 GN=Arid1a PE=1 SV=1	0.469518	0	0.005564	43.024	31.048	43.024					0.469518	0	0.005564	43.024			S	PQMPQYTSPQPGSALSPRQPSGGQMHSGVGS	0	0	0	0	0	0	0	0
A2BH40	365	A2BH40	A2BH40	AT-rich interactive domain-containing protein 1A	Arid1a	sp|A2BH40|ARI1A_MOUSE AT-rich interactive domain-containing protein 1A OS=Mus musculus OX=10090 GN=Arid1a PE=1 SV=1	0.972083	16.9876	0.00137567	47.082	40.501	47.082	0.94423	15.2459	0.00297576	40.432	0.972083	16.9876	0.00137567	47.082		1	S	AVSGGAQQRSHHAPMSPGSSGGGGQPLARTP	0	249.3	101.43	0	0	0	0	0
A2CG49	1771	A2CG49	A2CG49	Kalirin	Kalrn	sp|A2CG49|KALRN_MOUSE Kalirin OS=Mus musculus OX=10090 GN=Kalrn PE=1 SV=1	0.999996	54.3481	9.66e-07	100.48	54.319	100.48	0.998562	28.4148	9.66e-07	80.847	0.999996	54.3481	0.000473838	100.48		1	S	DGNIKKQKKVRDGRKSFDLGSPKPGDETTPQ	1895.3	2035.7	1092.4	2142.8	1527.5	1510.9	1245	1330.8
A2CG49;Q0KL02	1745;1779	A2CG49;Q0KL02	Q0KL02	Kalirin;Triple functional domain protein	Kalrn;Trio	sp|A2CG49|KALRN_MOUSE Kalirin OS=Mus musculus OX=10090 GN=Kalrn PE=1 SV=1;sp|Q0KL02|TRIO_MOUSE Triple functional domain protein OS=Mus musculus OX=10090 GN=Trio PE=1 SV=3	0.995764	23.7121	0.00323569	91.516	58.624	78.324	0.995764	23.7121	0.00665209	78.324	0.992104	20.9913	0.00323569	91.516		1	S	PGPKRPGNTLRKWLTSPVRRLSSGKADGHAK;PGPKRSTNTLKKWLTSPVRRLNSGKADGNIK	1409.5	1313.1	905.65	1616	742.4	932.22	809.41	1276.6
A2CG63	672	A2CG63	A2CG63	AT-rich interactive domain-containing protein 4B	Arid4b	sp|A2CG63|ARI4B_MOUSE AT-rich interactive domain-containing protein 4B OS=Mus musculus OX=10090 GN=Arid4b PE=1 SV=1	0.466164	0	0.0175492	40.589	24.698	40.589					0.466164	0	0.0175492	40.589			S	PKNCKLRRLSKSPFQSNPSPEMVSKLDLADA	0	0	0	0	0	0	0	0
A2CG63	675	A2CG63	A2CG63	AT-rich interactive domain-containing protein 4B	Arid4b	sp|A2CG63|ARI4B_MOUSE AT-rich interactive domain-containing protein 4B OS=Mus musculus OX=10090 GN=Arid4b PE=1 SV=1	0.965835	15.72	0.00882179	46.592	34.209	46.592					0.965835	15.72	0.00882179	46.592		1	S	CKLRRLSKSPFQSNPSPEMVSKLDLADAKNS	0	0	0	0	0	0	0	0
A2RS43	974	A2RS43	A2RS43		Pcdh7	tr|A2RS43|A2RS43_MOUSE Protocadherin 7 OS=Mus musculus OX=10090 GN=Pcdh7 PE=1 SV=1	0.98816	19.4219	5.35e-07	142.36	97.381	142.36	0.98816	19.4219	5.35e-07	142.36						1	S	PNGQRYDSVNEKLSDSPSMGRYRSVNGGPGS	3167.5	7161.3	2101.8	4362.5	1934.2	3817	1819.3	3170.1
A2RS43	1000	A2RS43	A2RS43		Pcdh7	tr|A2RS43|A2RS43_MOUSE Protocadherin 7 OS=Mus musculus OX=10090 GN=Pcdh7 PE=1 SV=1	0.728975	7.21886	1.94e-07	115.2	104.1	115.2	0.728975	7.21886	1.94e-07	115.2	0.355221	0.378388	0.00187671	48.867		2	S	GGPGSPDLARHYKSSSPLPTVQLHPQSPTAG	0	0	0	0	0	0	0	0
A2RS43	1011	A2RS43	A2RS43		Pcdh7	tr|A2RS43|A2RS43_MOUSE Protocadherin 7 OS=Mus musculus OX=10090 GN=Pcdh7 PE=1 SV=1	0.997877	26.7565	9.77e-64	202.84	174.21	135.55	0.995009	23.0048	1.94e-07	115.2	0.997877	26.7565	9.77e-64	202.84		1;2	S	YKSSSPLPTVQLHPQSPTAGKKHQAVQDLPP	3466.5	6670.9	3567.6	4193.9	3232.4	5153.3	3101	4801.1
A2RS43	989	A2RS43	A2RS43		Pcdh7	tr|A2RS43|A2RS43_MOUSE Protocadherin 7 OS=Mus musculus OX=10090 GN=Pcdh7 PE=1 SV=1	1	122.832	3.24e-123	257.23	200.68	257.23	1	122.832	3.24e-123	257.23	1	70.5993	3.48e-36	186.29		1	S	SPSMGRYRSVNGGPGSPDLARHYKSSSPLPT	9763.2	19523	12157	13732	9044.1	13876	8022.6	12279
A2RSJ4	1016	A2RSJ4	A2RSJ4	UHRF1-binding protein 1-like	Uhrf1bp1l	sp|A2RSJ4|BLT3B_MOUSE Bridge-like lipid transfer protein family member 3B OS=Mus musculus OX=10090 GN=Bltp3b PE=1 SV=2	0.333271	0	0.000554725	44.811	30.351	43.291	0.333255	0	0.000758461	44.301	0.333271	0	0.000554725	44.811			S	VASTDSDSVLNYRDGSTRLSLDDDGNHNPPS	0	0	0	0	0	0	0	0
A2RSJ4	1020	A2RSJ4	A2RSJ4	UHRF1-binding protein 1-like	Uhrf1bp1l	sp|A2RSJ4|BLT3B_MOUSE Bridge-like lipid transfer protein family member 3B OS=Mus musculus OX=10090 GN=Bltp3b PE=1 SV=2	0.691004	6.50559	1.82e-08	88.595	77.831	88.595	0.691004	6.50559	1.82e-08	88.595	0.333271	0	0.000554725	44.811		1	S	DSDSVLNYRDGSTRLSLDDDGNHNPPSNPVT	1337.9	1743.2	1203.3	841.87	880.92	1131.3	1025	716
A2RSJ4	774	A2RSJ4	A2RSJ4	UHRF1-binding protein 1-like	Uhrf1bp1l	sp|A2RSJ4|BLT3B_MOUSE Bridge-like lipid transfer protein family member 3B OS=Mus musculus OX=10090 GN=Bltp3b PE=1 SV=2	0.97539	16.0396	1.53e-09	96.887	74.25	96.887					0.97539	16.0396	1.53e-09	96.887		1	S	LAGRMKRKKLLKEYYSTESEPLTNGGQRPSS	0	0	0	0	0	0	0	0
A2RSJ4	1400	A2RSJ4	A2RSJ4	UHRF1-binding protein 1-like	Uhrf1bp1l	sp|A2RSJ4|BLT3B_MOUSE Bridge-like lipid transfer protein family member 3B OS=Mus musculus OX=10090 GN=Bltp3b PE=1 SV=2	0.467852	0	4.52e-08	64.315	54.466	64.315					0.467852	0	4.52e-08	64.315			S	CDVRMHSSVTQATQTSPEVPLPSQSANFLDI	0	0	0	0	0	0	0	0
A2RSJ4	414	A2RSJ4	A2RSJ4	UHRF1-binding protein 1-like	Uhrf1bp1l	sp|A2RSJ4|BLT3B_MOUSE Bridge-like lipid transfer protein family member 3B OS=Mus musculus OX=10090 GN=Bltp3b PE=1 SV=2	1	48.7942	0.000139232	77.053	59.258	48.794	1	48.7942	0.000139232	77.053	0.928436	12.2525	0.000615924	62.677		1;2	S	NVEMLKQAMKDRNLGSPPKSPTHASPQHTQT	1009	1912.4	178.41	801.75	1264.5	1070.8	1314.4	895.04
A2RSJ4	418	A2RSJ4	A2RSJ4	UHRF1-binding protein 1-like	Uhrf1bp1l	sp|A2RSJ4|BLT3B_MOUSE Bridge-like lipid transfer protein family member 3B OS=Mus musculus OX=10090 GN=Bltp3b PE=1 SV=2	0.969654	14.7842	0.000139232	77.053	59.258	57.496	0.969654	14.7842	0.000139232	77.053	0.855654	7.54877	0.000615924	62.677		2;3	S	LKQAMKDRNLGSPPKSPTHASPQHTQTEKDS	0	0	0	0	0	0	0	0
A2RSJ4	423	A2RSJ4	A2RSJ4	UHRF1-binding protein 1-like	Uhrf1bp1l	sp|A2RSJ4|BLT3B_MOUSE Bridge-like lipid transfer protein family member 3B OS=Mus musculus OX=10090 GN=Bltp3b PE=1 SV=2	0.903662	10.3909	0.00802528	43.099	33.815	43.099					0.903662	10.3909	0.00802528	43.099		3	S	KDRNLGSPPKSPTHASPQHTQTEKDSTLKGT	0	0	0	0	0	0	0	0
A2RSJ4	932	A2RSJ4	A2RSJ4	UHRF1-binding protein 1-like	Uhrf1bp1l	sp|A2RSJ4|BLT3B_MOUSE Bridge-like lipid transfer protein family member 3B OS=Mus musculus OX=10090 GN=Bltp3b PE=1 SV=2	0.510786	0.682738	0.0024552	58.487	40.755	58.487	0.510786	0.682738	0.0024552	58.487						1	S	HRIRNATLNHMSDNRSMSVDLSHAPLKDPLL	473.95	910.44	110.61	609.49	262.23	658.67	438.35	401.35
A2RSJ4	934	A2RSJ4	A2RSJ4	UHRF1-binding protein 1-like	Uhrf1bp1l	sp|A2RSJ4|BLT3B_MOUSE Bridge-like lipid transfer protein family member 3B OS=Mus musculus OX=10090 GN=Bltp3b PE=1 SV=2	0.854311	7.91624	0.00019723	92.856	74.242	58.071					0.854311	7.91624	0.00019723	92.856		1	S	IRNATLNHMSDNRSMSVDLSHAPLKDPLLFK	0	0	0	0	0	0	0	0
A2RSQ0	822	A2RSQ0	A2RSQ0	DENN domain-containing protein 5B	Dennd5b	sp|A2RSQ0|DEN5B_MOUSE DENN domain-containing protein 5B OS=Mus musculus OX=10090 GN=Dennd5b PE=1 SV=2	0.985628	18.3618	9.13e-28	165.3	153.86	133.93	0.84364	7.32032	9.13e-28	165.3	0.985628	18.3618	2.57e-15	133.93		1	S	LQFQDREEKQEHLTDSPVALGPERRKSDSGV	1201.1	1456.5	177.17	773.84	959.65	1551.8	843.22	1447.5
A2RSQ0	1076	A2RSQ0	A2RSQ0	DENN domain-containing protein 5B	Dennd5b	sp|A2RSQ0|DEN5B_MOUSE DENN domain-containing protein 5B OS=Mus musculus OX=10090 GN=Dennd5b PE=1 SV=2	0.969597	15.8193	0.0121352	45.973	33.205	42.789	0.969597	15.8193	0.0163003	42.789	0.921717	11.0851	0.0121352	45.973		1	S	RTPPQQKSPTTTRRLSITSLTGKPAKPNAGQ	649.07	942.31	0	891.74	345.63	1206.6	347.45	915.37
A2RTH5	247	A2RTH5	A2RTH5		Lcmt1	tr|A2RTH5|A2RTH5_MOUSE Leucine carboxyl methyltransferase 1 OS=Mus musculus OX=10090 GN=Lcmt1 PE=1 SV=1	0.999982	47.4395	0.000726495	69.594	44.272	69.594	0.999982	47.4395	0.000726495	69.594						1	S	DDRFGQIMIENLRRRSCDLAGVETCKSLESQ	615.37	1285	450.26	598.16	349.53	569.12	533.86	737.1
A2TJV2	269	A2TJV2	A2TJV2	Paralemmin-3	Palm3	sp|A2TJV2|PALM3_MOUSE Paralemmin-3 OS=Mus musculus OX=10090 GN=Palm3 PE=1 SV=1	0.55008	1.85786	0.000611913	77.527	54.994	77.527	0.55008	1.85786	0.000611913	77.527	0.462833	0	0.0028088	52.254		1	S	VEEVVLEAIGARQGTSSPELPTWVKEGRGVV	1337.2	1472.4	937.85	1123	1041.8	1228.9	1021.6	609.16
A2TJV2	270	A2TJV2	A2TJV2	Paralemmin-3	Palm3	sp|A2TJV2|PALM3_MOUSE Paralemmin-3 OS=Mus musculus OX=10090 GN=Palm3 PE=1 SV=1	0.957857	14.3596	3.45e-05	101.3	83.572	101.3					0.957857	14.3596	3.45e-05	101.3		1	S	EEVVLEAIGARQGTSSPELPTWVKEGRGVVE	0	0	0	0	0	0	0	0
A2TJV2	565	A2TJV2	A2TJV2	Paralemmin-3	Palm3	sp|A2TJV2|PALM3_MOUSE Paralemmin-3 OS=Mus musculus OX=10090 GN=Palm3 PE=1 SV=1	0.878438	8.60255	0.00563986	48.112	31.086	48.112	0.878438	8.60255	0.00563986	48.112						1	S	KGSKKLLDEKTGGEGSLDEEAEGSKKLLDRE	924.95	441.5	203.07	502.64	866.43	528.64	520.62	621.74
A2TJV2	601	A2TJV2	A2TJV2	Paralemmin-3	Palm3	sp|A2TJV2|PALM3_MOUSE Paralemmin-3 OS=Mus musculus OX=10090 GN=Palm3 PE=1 SV=1	0.961306	16.9625	0.00269085	48.477	34.605	48.477					0.961306	16.9625	0.00269085	48.477		1	S	PFSEVDKTSGAKDDVSPEEQGKANEGAEFQA	0	0	0	0	0	0	0	0
A3KFM7	1357	A3KFM7	A3KFM7	Chromodomain-helicase-DNA-binding protein 6	Chd6	sp|A3KFM7|CHD6_MOUSE Chromodomain-helicase-DNA-binding protein 6 OS=Mus musculus OX=10090 GN=Chd6 PE=1 SV=1	0.897455	10.2981	0.000280185	90.367	64.324	87.148					0.897455	10.2981	0.000280185	90.367		1	S	DSAEDKLDGLQKQTASPSDGSDGIFGEKKDD	0	0	0	0	0	0	0	0
A3KFM7	1359	A3KFM7	A3KFM7	Chromodomain-helicase-DNA-binding protein 6	Chd6	sp|A3KFM7|CHD6_MOUSE Chromodomain-helicase-DNA-binding protein 6 OS=Mus musculus OX=10090 GN=Chd6 PE=1 SV=1	0.868576	8.86009	0.00185251	55.452	46.02	55.452	0.868576	8.86009	0.00185251	55.452						1	S	AEDKLDGLQKQTASPSDGSDGIFGEKKDDSQ	367.21	624.51	283.14	307.94	269.94	383.21	364.2	410.67
A3KGF9	423	A3KGF9	A3KGF9	Uncharacterized protein C15orf52 homolog		sp|A3KGF9|CCD9B_MOUSE Coiled-coil domain-containing protein 9B OS=Mus musculus OX=10090 GN=Ccdc9b PE=1 SV=1	0.983276	18.763	8.25e-14	76.259	60.753	76.259					0.983276	18.763	8.25e-14	76.259		1	S	LKGESGTSTASLAPDSPQHSDLAPLDLSVGG	0	0	0	0	0	0	0	0
A3KGS3	818	A3KGS3	A3KGS3	Ral GTPase-activating protein subunit alpha-2	Ralgapa2	sp|A3KGS3|RGPA2_MOUSE Ral GTPase-activating protein subunit alpha-2 OS=Mus musculus OX=10090 GN=Ralgapa2 PE=1 SV=2	0.456765	0	0.00347161	58.071	27.633	58.071	0.456765	0	0.00347161	58.071							S	HVTHEHEGITMLVRRSSSPAELELKDDLQQA	0	0	0	0	0	0	0	0
A3KGS3	819	A3KGS3	A3KGS3	Ral GTPase-activating protein subunit alpha-2	Ralgapa2	sp|A3KGS3|RGPA2_MOUSE Ral GTPase-activating protein subunit alpha-2 OS=Mus musculus OX=10090 GN=Ralgapa2 PE=1 SV=2	0.456765	0	0.00347161	58.071	27.633	58.071	0.456765	0	0.00347161	58.071							S	VTHEHEGITMLVRRSSSPAELELKDDLQQAH	0	0	0	0	0	0	0	0
A3KGS3	820	A3KGS3	A3KGS3	Ral GTPase-activating protein subunit alpha-2	Ralgapa2	sp|A3KGS3|RGPA2_MOUSE Ral GTPase-activating protein subunit alpha-2 OS=Mus musculus OX=10090 GN=Ralgapa2 PE=1 SV=2	0.333333	0	0.0277551	45.359	15.886	45.359	0.333333	0	0.0277551	45.359							S	THEHEGITMLVRRSSSPAELELKDDLQQAHG	0	0	0	0	0	0	0	0
A6H619	1201	A6H619	A6H619	PHD and RING finger domain-containing protein 1	Phrf1	sp|A6H619|PHRF1_MOUSE PHD and RING finger domain-containing protein 1 OS=Mus musculus OX=10090 GN=Phrf1 PE=1 SV=2	0.996964	25.2486	0.000456306	84.365	70.207	84.365	0.996964	25.2486	0.000456306	84.365						1	S	KRAHSPEKKGPVREVSPAPATQGESRQDGDH	380.68	1274.6	392.86	523.41	482.78	568.5	384.37	655.25
A6H619	867	A6H619	A6H619	PHD and RING finger domain-containing protein 1	Phrf1	sp|A6H619|PHRF1_MOUSE PHD and RING finger domain-containing protein 1 OS=Mus musculus OX=10090 GN=Phrf1 PE=1 SV=2	0.999292	31.5489	0.00632156	68.893	37.471	68.893	0.998811	31.115	0.0231471	52.579	0.999292	31.5489	0.00632156	68.893		1	S	PGLLPSEITRTISINSPKAPAFQTVRCVTSY	468.72	1160.4	309.44	1313.3	702.74	1098.2	385.47	743.41
A6H6J9	390	A6H6J9	A6H6J9		Ankrd50	tr|A6H6J9|A6H6J9_MOUSE Ankyrin repeat domain 50 OS=Mus musculus OX=10090 GN=Ankrd50 PE=1 SV=1	0.76128	5.03655	0.000595908	60.949	39.146	60.949					0.76128	5.03655	0.000595908	60.949		1	S	QDSSRAQPQFLIHQQSSEQKRRNGIMTNPNY	0	0	0	0	0	0	0	0
A6H6J9	177	A6H6J9	A6H6J9		Ankrd50	tr|A6H6J9|A6H6J9_MOUSE Ankyrin repeat domain 50 OS=Mus musculus OX=10090 GN=Ankrd50 PE=1 SV=1	0.947009	15.9413	1.78e-94	235.21	206.85	76.151	0.482673	0	1.78e-94	235.21	0.947009	15.9413	0.00027842	76.151		1	S	QSAPSKMQSLTIRSNSSGGTGGGDLQPSLRG	0	0	0	0	0	0	0	0
A6H6J9	178	A6H6J9	A6H6J9		Ankrd50	tr|A6H6J9|A6H6J9_MOUSE Ankyrin repeat domain 50 OS=Mus musculus OX=10090 GN=Ankrd50 PE=1 SV=1	0.482673	0	1.78e-94	235.21	206.85	235.21	0.482673	0	1.78e-94	235.21							S	SAPSKMQSLTIRSNSSGGTGGGDLQPSLRGL	0	0	0	0	0	0	0	0
A6H8H5	481	A6H8H5	A6H8H5	Potassium voltage-gated channel subfamily B member 2	Kcnb2	sp|A6H8H5|KCNB2_MOUSE Potassium voltage-gated channel subfamily B member 2 OS=Mus musculus OX=10090 GN=Kcnb2 PE=1 SV=2	0.936421	14.4804	0.00403104	47.745	39.355	47.745	0.936421	14.4804	0.00403104	47.745						2	S	DVAVEKAGESANTKDSVDDNHLSPSRWKWAR	0	0	0	0	0	0	0	0
A6H8H5	488	A6H8H5	A6H8H5	Potassium voltage-gated channel subfamily B member 2	Kcnb2	sp|A6H8H5|KCNB2_MOUSE Potassium voltage-gated channel subfamily B member 2 OS=Mus musculus OX=10090 GN=Kcnb2 PE=1 SV=2	0.841275	7.31736	0.00403104	47.745	39.355	47.745	0.841275	7.31736	0.00403104	47.745						2	S	GESANTKDSVDDNHLSPSRWKWARKALSETS	0	0	0	0	0	0	0	0
A6H8H5	520	A6H8H5	A6H8H5	Potassium voltage-gated channel subfamily B member 2	Kcnb2	sp|A6H8H5|KCNB2_MOUSE Potassium voltage-gated channel subfamily B member 2 OS=Mus musculus OX=10090 GN=Kcnb2 PE=1 SV=2	0.589122	5.99718	0.0013318	44.534	34.386	44.534					0.589122	5.99718	0.0013318	44.534		2	S	NKSYENKYQEVSQNDSHEHLNNTSSSSPQHL	0	0	0	0	0	0	0	0
A6H8H5	528	A6H8H5	A6H8H5	Potassium voltage-gated channel subfamily B member 2	Kcnb2	sp|A6H8H5|KCNB2_MOUSE Potassium voltage-gated channel subfamily B member 2 OS=Mus musculus OX=10090 GN=Kcnb2 PE=1 SV=2	0.191294	0	3.46e-05	52.329	40.588	52.329					0.191294	0	3.46e-05	52.329			S	QEVSQNDSHEHLNNTSSSSPQHLSAQKLEML	0	0	0	0	0	0	0	0
A6H8H5	529	A6H8H5	A6H8H5	Potassium voltage-gated channel subfamily B member 2	Kcnb2	sp|A6H8H5|KCNB2_MOUSE Potassium voltage-gated channel subfamily B member 2 OS=Mus musculus OX=10090 GN=Kcnb2 PE=1 SV=2	0.191294	0	3.46e-05	52.329	40.588	52.329					0.191294	0	3.46e-05	52.329			S	EVSQNDSHEHLNNTSSSSPQHLSAQKLEMLY	0	0	0	0	0	0	0	0
A6H8H5	530	A6H8H5	A6H8H5	Potassium voltage-gated channel subfamily B member 2	Kcnb2	sp|A6H8H5|KCNB2_MOUSE Potassium voltage-gated channel subfamily B member 2 OS=Mus musculus OX=10090 GN=Kcnb2 PE=1 SV=2	0.455532	0	5.34e-20	119.14	105.4	119.14					0.455532	0	5.34e-20	119.14			S	VSQNDSHEHLNNTSSSSPQHLSAQKLEMLYN	0	0	0	0	0	0	0	0
A6H8H5	531	A6H8H5	A6H8H5	Potassium voltage-gated channel subfamily B member 2	Kcnb2	sp|A6H8H5|KCNB2_MOUSE Potassium voltage-gated channel subfamily B member 2 OS=Mus musculus OX=10090 GN=Kcnb2 PE=1 SV=2	0.455532	0	5.34e-20	119.14	105.4	119.14					0.455532	0	5.34e-20	119.14			S	SQNDSHEHLNNTSSSSPQHLSAQKLEMLYNE	0	0	0	0	0	0	0	0
A6X919	19	A6X919	A6X919	Probable C-mannosyltransferase DPY19L1	Dpy19l1	sp|A6X919|D19L1_MOUSE Probable C-mannosyltransferase DPY19L1 OS=Mus musculus OX=10090 GN=Dpy19l1 PE=1 SV=1	0.333333	0	3.5e-16	123.36	107.06	123.36	0.333333	0	3.5e-16	123.36							S	QARSKHRDAAPRPPRSARSSPPPLSGASEVD	0	0	0	0	0	0	0	0
A6X919	22	A6X919	A6X919	Probable C-mannosyltransferase DPY19L1	Dpy19l1	sp|A6X919|D19L1_MOUSE Probable C-mannosyltransferase DPY19L1 OS=Mus musculus OX=10090 GN=Dpy19l1 PE=1 SV=1	0.499989	0	3.5e-16	123.36	107.06	99.092	0.49975	0	3.5e-16	123.36	0.499989	0	1.95e-08	99.092		1	S	SKHRDAAPRPPRSARSSPPPLSGASEVDAGE	0	0	0	0	0	0	0	0
A6X919	23	A6X919	A6X919	Probable C-mannosyltransferase DPY19L1	Dpy19l1	sp|A6X919|D19L1_MOUSE Probable C-mannosyltransferase DPY19L1 OS=Mus musculus OX=10090 GN=Dpy19l1 PE=1 SV=1	0.586858	1.52433	7.29e-53	185.85	155.52	185.85	0.586858	1.52433	7.29e-53	185.85	0.544429	0.773884	1.57e-09	111.95		1	S	KHRDAAPRPPRSARSSPPPLSGASEVDAGEL	2012.4	3754.7	2398.5	2175.1	2473.1	2760	2297.5	2264.3
A8DUK4	13	A8DUK4	A8DUK4		Hbbt1	tr|A8DUK4|A8DUK4_MOUSE Beta-globin OS=Mus musculus OX=10090 GN=Hbb-bs PE=1 SV=1	1	93.1105	0.000380992	93.111	72.24	93.111	1	93.1105	0.000380992	93.111	1	65.3469	0.00463353	65.347		1	S	___MVHLTDAEKAAVSGLWGKVNADEVGGEA	825.77	746.28	793.08	1120.6	628.95	1346.3	1280.8	598.72
A8DUK4;P02089;P02088	88;88;88	A8DUK4;P02088	A8DUK4	Hemoglobin subunit beta-2;Hemoglobin subunit beta-1	Hbbt1;Hbb-b2;Hbb-b1	tr|A8DUK4|A8DUK4_MOUSE Beta-globin OS=Mus musculus OX=10090 GN=Hbb-bs PE=1 SV=1;sp|P02089|HBB2_MOUSE Hemoglobin subunit beta-2 OS=Mus musculus OX=10090 GN=Hbb-b2 PE=1 SV=2;sp|P02088|HBB1_MOUSE Hemoglobin subunit beta-1 OS=Mus musculus OX=10090 GN=Hbb-b1 PE	0.960143	13.8594	5.4e-06	84.297	56.436	84.297					0.960143	13.8594	5.4e-06	84.297		1	S	NDGLNHLDSLKGTFASLSELHCDKLHVDPEN	0	0	0	0	0	0	0	0
A8DUK4;P02089;P02088	90;90;90	A8DUK4;P02088	A8DUK4	Hemoglobin subunit beta-2;Hemoglobin subunit beta-1	Hbbt1;Hbb-b2;Hbb-b1	tr|A8DUK4|A8DUK4_MOUSE Beta-globin OS=Mus musculus OX=10090 GN=Hbb-bs PE=1 SV=1;sp|P02089|HBB2_MOUSE Hemoglobin subunit beta-2 OS=Mus musculus OX=10090 GN=Hbb-b2 PE=1 SV=2;sp|P02088|HBB1_MOUSE Hemoglobin subunit beta-1 OS=Mus musculus OX=10090 GN=Hbb-b1 PE	0.49261	0	0.000565936	69.729	41.867	69.729					0.49261	0	0.000565936	69.729			S	GLNHLDSLKGTFASLSELHCDKLHVDPENFR	0	0	0	0	0	0	0	0
A9Z1V5	175	A9Z1V5	A9Z1V5	von Willebrand factor A domain-containing protein 5B1	Vwa5b1	sp|A9Z1V5|VW5B1_MOUSE von Willebrand factor A domain-containing protein 5B1 OS=Mus musculus OX=10090 GN=Vwa5b1 PE=2 SV=1	0.783221	6.13769	0.000738252	84.479	68.889	84.479	0.783221	6.13769	0.000738252	84.479	0.72762	4.85164	0.00294495	69.672		1	S	APTVPPSCTHRFGSSSPQPQGKDPHCFGTQT	491.48	706.15	256.87	592.36	636.5	377.69	990.38	128.48
A9Z1V5	763	A9Z1V5	A9Z1V5	von Willebrand factor A domain-containing protein 5B1	Vwa5b1	sp|A9Z1V5|VW5B1_MOUSE von Willebrand factor A domain-containing protein 5B1 OS=Mus musculus OX=10090 GN=Vwa5b1 PE=2 SV=1	0.711465	4.11966	6.53e-27	153.41	131.48	153.41					0.711465	4.11966	6.53e-27	153.41		1	S	LDCGASRTSAPNSQSSEDLAIEPAHCPSTFE	0	0	0	0	0	0	0	0
B1AR13	93	B1AR13	B1AR13	CDGSH iron-sulfur domain-containing protein 3
B1AR17	764	B1AR17	B1AR17		Chd3	tr|B1AR17|B1AR17_MOUSE DNA helicase OS=Mus musculus OX=10090 GN=Chd3 PE=1 SV=1	0.747425	4.74978	4.38e-15	139.6	109.87	139.6	0.706321	3.89962	2.13e-06	108.34	0.747425	4.74978	4.38e-15	139.6		1	S	KYKKKKKELQGDGPPSSPTNDPTVKYETQPR	877.13	1079.2	379.01	1067.5	897.43	529.39	763.28	834.24
B1AR17	765	B1AR17	B1AR17		Chd3	tr|B1AR17|B1AR17_MOUSE DNA helicase OS=Mus musculus OX=10090 GN=Chd3 PE=1 SV=1	0.507031	0.129827	7.64e-06	96.848	77.638	96.848	0.454506	0	0.00011079	68.82	0.507031	0.129827	7.64e-06	96.848		1	S	YKKKKKELQGDGPPSSPTNDPTVKYETQPRF	0	0	0	0	0	0	0	0
B1AR17	1651	B1AR17	B1AR17		Chd3	tr|B1AR17|B1AR17_MOUSE DNA helicase OS=Mus musculus OX=10090 GN=Chd3 PE=1 SV=1	0.889335	9.06442	4.05e-05	103.61	82.052	103.61	0.889335	9.06442	4.05e-05	103.61						1	S	EKNSKVGEKMEAEVDSPSPAPSLGERLEHRK	665.61	1196.9	367.17	505.8	737.7	528.8	343.89	500.28
B1ART2	1139	B1ART2	B1ART2		Vps13d	tr|B1ART2|B1ART2_MOUSE Vacuolar protein sorting 13D OS=Mus musculus OX=10090 GN=Vps13d PE=1 SV=2	0.987321	18.9137	0.00428023	45.047	41.386	42.64					0.987321	18.9137	0.00428023	45.047		1	S	IGFLQKSFPKEKDDVSPQPLMTDLERSIVEQ	0	0	0	0	0	0	0	0
B1ART2	2080	B1ART2	B1ART2		Vps13d	tr|B1ART2|B1ART2_MOUSE Vacuolar protein sorting 13D OS=Mus musculus OX=10090 GN=Vps13d PE=1 SV=2	0.919412	12.4603	1.28e-07	116.63	73.353	116.63	0.919412	12.4603	1.28e-07	116.63	0.713256	6.44445	0.000979936	71.085		1	S	PGTFSLQDKESVPSASPAGTPKHSMRKMTTT	2608.6	3325.6	1160	3171	1745.6	2032	1533.5	2305.8
B1ART2	2435	B1ART2	B1ART2		Vps13d	tr|B1ART2|B1ART2_MOUSE Vacuolar protein sorting 13D OS=Mus musculus OX=10090 GN=Vps13d PE=1 SV=2	0.78964	6.46215	0.00170822	76.326	41.518	76.326					0.78964	6.46215	0.00170822	76.326		1	S	DIKKQNVTPARHRNASSESAVVPKTVKSGVV	0	0	0	0	0	0	0	0
B1ART2	2436	B1ART2	B1ART2		Vps13d	tr|B1ART2|B1ART2_MOUSE Vacuolar protein sorting 13D OS=Mus musculus OX=10090 GN=Vps13d PE=1 SV=2	0.678535	3.42201	1.21e-09	132.79	101.42	132.79	0.678535	3.42201	1.21e-09	132.79						1	S	IKKQNVTPARHRNASSESAVVPKTVKSGVVT	4383.4	5265.8	2679.7	4172.9	4227.3	4691.2	2609	3934.8
B1ART2	1725	B1ART2	B1ART2		Vps13d	tr|B1ART2|B1ART2_MOUSE Vacuolar protein sorting 13D OS=Mus musculus OX=10090 GN=Vps13d PE=1 SV=2	0.5	0	0.000955873	50.608	45.235	50.608					0.5	0	0.000955873	50.608		1	S	SCPSVSSVEYPDMPRSLPSHMEEAPNVFQLY	0	0	0	0	0	0	0	0
B1ART2	1728	B1ART2	B1ART2		Vps13d	tr|B1ART2|B1ART2_MOUSE Vacuolar protein sorting 13D OS=Mus musculus OX=10090 GN=Vps13d PE=1 SV=2	0.5	0	0.000955873	50.608	45.235	50.608					0.5	0	0.000955873	50.608		1	S	SVSSVEYPDMPRSLPSHMEEAPNVFQLYQRP	0	0	0	0	0	0	0	0
B1AUH1	853	B1AUH1	B1AUH1	Receptor-type tyrosine-protein phosphatase U	Ptpru	sp|B1AUH1|PTPRU_MOUSE Receptor-type tyrosine-protein phosphatase U OS=Mus musculus OX=10090 GN=Ptpru PE=1 SV=1	1	72.6361	2.21e-39	176.29	142.42	176.29	0.999784	37.2596	3.92e-10	130.2	1	72.6361	2.21e-39	176.29		1	S	QRSGGVTEASSLLGGSPRRPCGRKGSPYHTG	605.9	1042.4	316.04	639.9	459.08	576.81	370.82	522.14
B1AVP0	280	B1AVP0	B1AVP0	Phosphatase and actin regulator	Phactr2	tr|B1AVP0|B1AVP0_MOUSE Phosphatase and actin regulator OS=Mus musculus OX=10090 GN=Phactr2 PE=1 SV=1	0.821491	7.15558	1.1e-09	113.6	92.036	113.6					0.821491	7.15558	1.1e-09	113.6		1	S	RGKKKISKQPVASRLSPSTTTSDTPSLKGEL	0	0	0	0	0	0	0	0
B1AWC9	318	B1AWC9	B1AWC9		Pde4b	tr|B1AWC9|B1AWC9_MOUSE Phosphodiesterase OS=Mus musculus OX=10090 GN=Pde4b PE=1 SV=1	0.651095	2.7312	3.83e-08	121.24	96.895	121.24	0.651095	2.7312	3.83e-08	121.24						1	S	QLMTQISGVKKLMHSSSLNNTSISRFGVNTE	1307.9	1107.3	432.29	820.8	731.2	1135.9	360.11	787.39
B1AWC9	319	B1AWC9	B1AWC9		Pde4b	tr|B1AWC9|B1AWC9_MOUSE Phosphodiesterase OS=Mus musculus OX=10090 GN=Pde4b PE=1 SV=1	0.931549	12.7181	6.4e-05	97.904	84.072	51.495	0.931549	12.7181	0.000238896	82.59	0.822917	7.0234	6.4e-05	97.904		1	S	LMTQISGVKKLMHSSSLNNTSISRFGVNTEN	1163.1	1822	440.1	862.21	878.86	923.95	535.91	1231.1
B1AWC9	290	B1AWC9	B1AWC9		Pde4b	tr|B1AWC9|B1AWC9_MOUSE Phosphodiesterase OS=Mus musculus OX=10090 GN=Pde4b PE=1 SV=1	0.997301	25.6769	4.05e-44	195.94	167.71	195.94	0.963882	14.263	6.59e-14	149.57	0.997301	25.6769	4.05e-44	195.94		1	S	ISNTFLDKQNDVEIPSPTQKDREKKKKQQLM	7145.9	7606.1	635.37	6230.7	6154.9	6688.5	5632.2	5915.2
B1AWC9;Q3UEI1;O89084;Q01063	133;121;140;129	B1AWC9;O89084;Q01063	B1AWC9	cAMP-specific 3'
B1AWC9;Q01063	140;136	B1AWC9;Q01063	B1AWC9	cAMP-specific 3'
B1AWC9;Q01063	145;141	B1AWC9;Q01063	B1AWC9	cAMP-specific 3'
B1AWN6	484	B1AWN6	B1AWN6	Sodium channel protein	Scn2a1	sp|B1AWN6|SCN2A_MOUSE Sodium channel protein type 2 subunit alpha OS=Mus musculus OX=10090 GN=Scn2a PE=1 SV=1	0.656792	6.60467	4.24e-09	109.38	86.243	109.38					0.656792	6.60467	4.24e-09	109.38		1	S	AESRDFSGAGGIGVFSESSSVASKLSSKSEK	0	0	0	0	0	0	0	0
B1AWN6	486	B1AWN6	B1AWN6	Sodium channel protein	Scn2a1	sp|B1AWN6|SCN2A_MOUSE Sodium channel protein type 2 subunit alpha OS=Mus musculus OX=10090 GN=Scn2a PE=1 SV=1	0.239449	0	8.02e-05	72.089	55.423	72.089					0.239449	0	8.02e-05	72.089			S	SRDFSGAGGIGVFSESSSVASKLSSKSEKEL	0	0	0	0	0	0	0	0
B1AWN6	487	B1AWN6	B1AWN6	Sodium channel protein	Scn2a1	sp|B1AWN6|SCN2A_MOUSE Sodium channel protein type 2 subunit alpha OS=Mus musculus OX=10090 GN=Scn2a PE=1 SV=1	0.239449	0	8.02e-05	72.089	55.423	72.089					0.239449	0	8.02e-05	72.089			S	RDFSGAGGIGVFSESSSVASKLSSKSEKELK	0	0	0	0	0	0	0	0
B1AWN6	488	B1AWN6	B1AWN6	Sodium channel protein	Scn2a1	sp|B1AWN6|SCN2A_MOUSE Sodium channel protein type 2 subunit alpha OS=Mus musculus OX=10090 GN=Scn2a PE=1 SV=1	0.239449	0	8.02e-05	72.089	55.423	72.089					0.239449	0	8.02e-05	72.089			S	DFSGAGGIGVFSESSSVASKLSSKSEKELKN	0	0	0	0	0	0	0	0
B1AWN6	540	B1AWN6	B1AWN6	Sodium channel protein	Scn2a1	sp|B1AWN6|SCN2A_MOUSE Sodium channel protein type 2 subunit alpha OS=Mus musculus OX=10090 GN=Scn2a PE=1 SV=1	0.999999	59.9238	0.000128119	92.856	82.308	92.856	0.999992	51.2258	0.000709775	83.783	0.999999	59.9238	0.000128119	92.856		1	S	KSASEDSIRKKGFRFSLEGSRLTYEKRFSSP	1739.6	2830.9	1110.2	1879.6	2263.3	1815.6	871.41	1546.7
B1AWN6	558	B1AWN6	B1AWN6	Sodium channel protein	Scn2a1	sp|B1AWN6|SCN2A_MOUSE Sodium channel protein type 2 subunit alpha OS=Mus musculus OX=10090 GN=Scn2a PE=1 SV=1	0.827707	10.9707	0.00535419	49.482	37.316	49.482					0.827707	10.9707	0.00535419	49.482		1	S	GSRLTYEKRFSSPHQSLLSIRGSLFSPRRNS	0	0	0	0	0	0	0	0
B1AWN6	1959	B1AWN6	B1AWN6	Sodium channel protein	Scn2a1	sp|B1AWN6|SCN2A_MOUSE Sodium channel protein type 2 subunit alpha OS=Mus musculus OX=10090 GN=Scn2a PE=1 SV=1	0.5	0	0.0393432	42.743	15.122	42.743	0.5	0	0.0393432	42.743						1	S	TPIKEDIITDKLNENSTPEKTDVTPSTTSPP	1087.4	2519.7	419.55	1801.1	1124.9	1271.4	1570.1	1334.8
B1AWN6	468	B1AWN6	B1AWN6	Sodium channel protein	Scn2a1	sp|B1AWN6|SCN2A_MOUSE Sodium channel protein type 2 subunit alpha OS=Mus musculus OX=10090 GN=Scn2a PE=1 SV=1	0.999941	42.2916	1.53e-22	156.15	132.79	156.15					0.999941	42.2916	1.53e-22	156.15		1	S	LKKQQEEAQAAAAAASAESRDFSGAGGIGVF	0	0	0	0	0	0	0	0
B1AWN6	471	B1AWN6	B1AWN6	Sodium channel protein	Scn2a1	sp|B1AWN6|SCN2A_MOUSE Sodium channel protein type 2 subunit alpha OS=Mus musculus OX=10090 GN=Scn2a PE=1 SV=1	0.969794	15.0658	6e-16	144.72	124.62	76.176	0.969794	15.0658	0.000278124	76.176	0.939685	11.9255	6e-16	144.72		1	S	QQEEAQAAAAAASAESRDFSGAGGIGVFSES	925	1668.3	637.99	608.9	2555.4	513.81	792.38	1169.7
B1AWN6;A2ASI5	610;610	B1AWN6	B1AWN6	Sodium channel protein	Scn2a1;Scn3a	sp|B1AWN6|SCN2A_MOUSE Sodium channel protein type 2 subunit alpha OS=Mus musculus OX=10090 GN=Scn2a PE=1 SV=1;sp|A2ASI5|SCN3A_MOUSE Sodium channel protein type 3 subunit alpha OS=Mus musculus OX=10090 GN=Scn3a PE=1 SV=1	1	102.4	5.1e-05	102.4	59.657	102.4	1	102.4	5.1e-05	102.4	1	59.4259	0.00293334	61.435		1	S	DDEHSTFEDNDSRRDSLFVPHRHGERRPSNV	0	481.96	143.43	221.9	244.79	321.99	112.21	0
B1AWN6	688	B1AWN6	B1AWN6	Sodium channel protein	Scn2a1	sp|B1AWN6|SCN2A_MOUSE Sodium channel protein type 2 subunit alpha OS=Mus musculus OX=10090 GN=Scn2a PE=1 SV=1	0.374384	0.803737	0.00158983	46.982	38.19	46.982					0.374384	0.803737	0.00158983	46.982			S	EGTTTETEIRKRRSSSYHVSMDLLEDPTSRQ	0	0	0	0	0	0	0	0
B1AWN6	692	B1AWN6	B1AWN6	Sodium channel protein	Scn2a1	sp|B1AWN6|SCN2A_MOUSE Sodium channel protein type 2 subunit alpha OS=Mus musculus OX=10090 GN=Scn2a PE=1 SV=1	0.993304	26.966	0.00034959	51.193	44.265	51.193					0.993304	26.966	0.00034959	51.193		1	S	TETEIRKRRSSSYHVSMDLLEDPTSRQRAMS	0	0	0	0	0	0	0	0
B1AWN6	1969	B1AWN6	B1AWN6	Sodium channel protein	Scn2a1	sp|B1AWN6|SCN2A_MOUSE Sodium channel protein type 2 subunit alpha OS=Mus musculus OX=10090 GN=Scn2a PE=1 SV=1	0.227682	0	0.000323333	50.425	38.344	50.425	0.227682	0	0.000323333	50.425							S	KLNENSTPEKTDVTPSTTSPPSYDSVTKPEK	0	0	0	0	0	0	0	0
B1AWN6	1972	B1AWN6	B1AWN6	Sodium channel protein	Scn2a1	sp|B1AWN6|SCN2A_MOUSE Sodium channel protein type 2 subunit alpha OS=Mus musculus OX=10090 GN=Scn2a PE=1 SV=1	0.82787	7.42918	1.38e-12	126.45	111.83	126.45	0.469003	0	8.38e-09	103.1	0.82787	7.42918	1.38e-12	126.45		1	S	ENSTPEKTDVTPSTTSPPSYDSVTKPEKEKF	0	0	0	0	0	0	0	0
B1AXH1	690	B1AXH1	B1AXH1	NHS-like protein 2	Nhsl2	sp|B1AXH1|NHSL2_MOUSE NHS-like protein 2 OS=Mus musculus OX=10090 GN=Nhsl2 PE=1 SV=2	0.996608	25.5728	1.64e-10	125.5	100.54	125.5	0.984327	18.0506	0.000314443	91.207	0.996608	25.5728	1.64e-10	125.5		1	S	LASPSTSRATTPSQLSIEVEAREVASPGRPT	781.38	683.49	386.2	381.51	381.31	224.25	546.84	598.76
B1AXH1	499	B1AXH1	B1AXH1	NHS-like protein 2	Nhsl2	sp|B1AXH1|NHSL2_MOUSE NHS-like protein 2 OS=Mus musculus OX=10090 GN=Nhsl2 PE=1 SV=2	0.871427	10.9077	3.75e-10	120.29	98.739	120.29					0.871427	10.9077	3.75e-10	120.29		1	S	ETGPGGTNRFRERSLSVPTDSGVTSVDYDEE	0	0	0	0	0	0	0	0
B1AY10	126	B1AY10	B1AY10	Transcriptional repressor NF-X1	Nfx1	sp|B1AY10|NFX1_MOUSE Transcriptional repressor NF-X1 OS=Mus musculus OX=10090 GN=Nfx1 PE=1 SV=1	0.49655	0	0.00012916	82.007	59.532	82.007					0.49655	0	0.00012916	82.007			S	HQNRNKKAQGLSEQTSDTSSLESVARSESGT	0	0	0	0	0	0	0	0
B1AY10	81	B1AY10	B1AY10	Transcriptional repressor NF-X1	Nfx1	sp|B1AY10|NFX1_MOUSE Transcriptional repressor NF-X1 OS=Mus musculus OX=10090 GN=Nfx1 PE=1 SV=1	1	72.3128	0.00030149	91.584	67.292	91.584					1	72.3128	0.00030149	91.584		1	S	SAVHQHSYASGSKPKSPQGFFQSSNKSLKNH	0	0	0	0	0	0	0	0
B1AY13	2074	B1AY13	B1AY13	Ubiquitin carboxyl-terminal hydrolase 24	Usp24	sp|B1AY13|UBP24_MOUSE Ubiquitin carboxyl-terminal hydrolase 24 OS=Mus musculus OX=10090 GN=Usp24 PE=1 SV=1	0.979797	18.793	1.88e-54	187.06	168.77	187.06	0.914348	13.4871	5.51e-12	106.73	0.979797	18.793	1.88e-54	187.06		1	S	EAEDLSLSAPSSPEISPQSSPRPHRPNNDRL	330.8	709.86	509.85	261.53	740.64	566.37	380.9	467.23
B1AY13	2077	B1AY13	B1AY13	Ubiquitin carboxyl-terminal hydrolase 24	Usp24	sp|B1AY13|UBP24_MOUSE Ubiquitin carboxyl-terminal hydrolase 24 OS=Mus musculus OX=10090 GN=Usp24 PE=1 SV=1	0.422571	0	1.28e-05	52.777	41.873	52.777					0.422571	0	1.28e-05	52.777			S	DLSLSAPSSPEISPQSSPRPHRPNNDRLSIL	0	0	0	0	0	0	0	0
B1AY13	2078	B1AY13	B1AY13	Ubiquitin carboxyl-terminal hydrolase 24	Usp24	sp|B1AY13|UBP24_MOUSE Ubiquitin carboxyl-terminal hydrolase 24 OS=Mus musculus OX=10090 GN=Usp24 PE=1 SV=1	0.422571	0	1.28e-05	52.777	41.873	52.777					0.422571	0	1.28e-05	52.777			S	LSLSAPSSPEISPQSSPRPHRPNNDRLSILT	0	0	0	0	0	0	0	0
B1AY13	2044	B1AY13	B1AY13	Ubiquitin carboxyl-terminal hydrolase 24	Usp24	sp|B1AY13|UBP24_MOUSE Ubiquitin carboxyl-terminal hydrolase 24 OS=Mus musculus OX=10090 GN=Usp24 PE=1 SV=1	0.99999	50.1758	9.35e-09	117.93	87.105	116.71	0.996354	24.3659	9.35e-09	113.65	0.99999	50.1758	9.48e-09	117.93		1	S	WNAYMLFYQRVSDQNSPVLPKKSRVSVVRQE	2080.8	2704.4	1389.5	2386.2	1995.8	2486.6	1690.7	2475.3
B1AYL1	1511	B1AYL1	B1AYL1	Sodium channel protein	Scn7a	tr|B1AYL1|B1AYL1_MOUSE Sodium channel protein OS=Mus musculus OX=10090 GN=Scn7a PE=1 SV=1	0.999933	41.7472	6.6e-05	121.73	85.399	121.73	0.999933	41.7472	6.6e-05	121.73	0.879192	8.61986	0.0340088	62.303		1	S	MEFLSIPSQKKSRTLSEDDFRRFFRVWNRFD	5494.9	3087	4090.2	2152.8	3871.6	2149.5	3517.4	2441
B1AZA5	12	B1AZA5	B1AZA5	Transmembrane protein 245	Tmem245	sp|B1AZA5|TM245_MOUSE Transmembrane protein 245 OS=Mus musculus OX=10090 GN=Tmem245 PE=1 SV=1	1	50.1945	0.00840335	50.194	19.631	50.194	1	50.1945	0.00840335	50.194	1	45.9081	0.0262144	45.908		1;2	S	____MADRGGPAEAPSPRGSPRPESRAPRTV	750.8	892.01	489.42	458.21	676.21	751.59	331.14	513.72
B1AZA5	16	B1AZA5	B1AZA5	Transmembrane protein 245	Tmem245	sp|B1AZA5|TM245_MOUSE Transmembrane protein 245 OS=Mus musculus OX=10090 GN=Tmem245 PE=1 SV=1	0.766778	4.77777	0.00840335	42.338	34.977	42.338	0.766778	4.77777	0.00840335	42.338						2	S	MADRGGPAEAPSPRGSPRPESRAPRTVGPGE	0	0	0	0	0	0	0	0
B1AZA5	323	B1AZA5	B1AZA5	Transmembrane protein 245	Tmem245	sp|B1AZA5|TM245_MOUSE Transmembrane protein 245 OS=Mus musculus OX=10090 GN=Tmem245 PE=1 SV=1	0.909591	10.0416	0.000191944	91.961	31.371	91.961					0.909591	10.0416	0.000191944	91.961		1	S	EPPPALSASSSSSSRSSPSSPSPTLGRQRPE	0	0	0	0	0	0	0	0
B1AZA5	326	B1AZA5	B1AZA5	Transmembrane protein 245	Tmem245	sp|B1AZA5|TM245_MOUSE Transmembrane protein 245 OS=Mus musculus OX=10090 GN=Tmem245 PE=1 SV=1	0.422602	1.68347	0.000492271	84.188	66.324	84.188					0.422602	1.68347	0.000492271	84.188			S	PALSASSSSSSRSSPSSPSPTLGRQRPEMGT	0	0	0	0	0	0	0	0
B1AZA5	327	B1AZA5	B1AZA5	Transmembrane protein 245	Tmem245	sp|B1AZA5|TM245_MOUSE Transmembrane protein 245 OS=Mus musculus OX=10090 GN=Tmem245 PE=1 SV=1	0.41868	0	0.000836205	78.903	59.266	78.903	0.41868	0	0.000836205	78.903							S	ALSASSSSSSRSSPSSPSPTLGRQRPEMGTF	0	0	0	0	0	0	0	0
B1AZA5	329	B1AZA5	B1AZA5	Transmembrane protein 245	Tmem245	sp|B1AZA5|TM245_MOUSE Transmembrane protein 245 OS=Mus musculus OX=10090 GN=Tmem245 PE=1 SV=1	0.593609	1.70513	5.94e-11	138.24	103.85	138.24	0.593609	1.70513	5.94e-11	138.24						1	S	SASSSSSSRSSPSSPSPTLGRQRPEMGTFLR	2385.8	3065.1	1305.6	2191.6	2069.8	2232.3	1606.9	2488.6
B1AZI6	1520	B1AZI6	B1AZI6	THO complex subunit 2	Thoc2	sp|B1AZI6|THOC2_MOUSE THO complex subunit 2 OS=Mus musculus OX=10090 GN=Thoc2 PE=1 SV=1	0.41166	0.680077	0.00540404	52.555	31.602	52.555	0.41166	0.680077	0.00540404	52.555							S	GTMGVSKHKSESPCESQYPNEKDKEKNKSKS	0	0	0	0	0	0	0	0
B1AZP2	968	B1AZP2	B1AZP2	Disks large-associated protein 4	Dlgap4	sp|B1AZP2|DLGP4_MOUSE Disks large-associated protein 4 OS=Mus musculus OX=10090 GN=Dlgap4 PE=1 SV=1	0.828856	9.02997	0.00240464	42.865	31.341	42.865	0.828856	9.02997	0.00240464	42.865						2	S	RQEARKRLLAAKRAASVRQNSATESADSIEI	0	0	0	0	0	0	0	0
B1AZP2	973	B1AZP2	B1AZP2	Disks large-associated protein 4	Dlgap4	sp|B1AZP2|DLGP4_MOUSE Disks large-associated protein 4 OS=Mus musculus OX=10090 GN=Dlgap4 PE=1 SV=1	0.986859	18.7562	0	430.22	398.34	192.62	0.986859	18.7562	0	430.22	0.893897	9.32903	3.39e-123	241.44		1	S	KRLLAAKRAASVRQNSATESADSIEIYVPEA	18608	34088	20499	15897	25243	28204	21887	23705
B1AZP2	977	B1AZP2	B1AZP2	Disks large-associated protein 4	Dlgap4	sp|B1AZP2|DLGP4_MOUSE Disks large-associated protein 4 OS=Mus musculus OX=10090 GN=Dlgap4 PE=1 SV=1	0.625296	5.04807	0.000306253	63.037	48.476	63.037					0.625296	5.04807	0.000306253	63.037		1	S	AAKRAASVRQNSATESADSIEIYVPEAQTRL	0	0	0	0	0	0	0	0
B1AZP2	980	B1AZP2	B1AZP2	Disks large-associated protein 4	Dlgap4	sp|B1AZP2|DLGP4_MOUSE Disks large-associated protein 4 OS=Mus musculus OX=10090 GN=Dlgap4 PE=1 SV=1	0.805736	6.45981	0.000194403	60.55	47.146	60.55	0.805736	6.45981	0.000194403	60.55						1	S	RAASVRQNSATESADSIEIYVPEAQTRL___	410.68	490.74	426.57	150.69	377.66	416.15	216.78	396.39
B1AZP2	534	B1AZP2	B1AZP2	Disks large-associated protein 4	Dlgap4	sp|B1AZP2|DLGP4_MOUSE Disks large-associated protein 4 OS=Mus musculus OX=10090 GN=Dlgap4 PE=1 SV=1	0.474921	4.55505	1.36e-08	63.331	48.848	63.331	0.474921	4.55505	1.36e-08	63.331							S	AGCSQEEDSVSLQSLSPPPSTGSLSNSRTLP	0	0	0	0	0	0	0	0
B1AZP2	156	B1AZP2	B1AZP2	Disks large-associated protein 4	Dlgap4	sp|B1AZP2|DLGP4_MOUSE Disks large-associated protein 4 OS=Mus musculus OX=10090 GN=Dlgap4 PE=1 SV=1	0.999995	53.2167	0.000169202	94.616	75.139	94.616	0.999995	53.2167	0.000169202	94.616						1	S	HLVHSVQRLFFTKAPSMEGTAGKVGGNGSKK	1723.5	3181.4	776.84	1789.1	1663.9	1733.1	1222	2022.8
B1AZP2	405	B1AZP2	B1AZP2	Disks large-associated protein 4	Dlgap4	sp|B1AZP2|DLGP4_MOUSE Disks large-associated protein 4 OS=Mus musculus OX=10090 GN=Dlgap4 PE=1 SV=1	0.997566	26.1291	3.67e-11	121.76	101.92	121.76	0.991679	20.9814	1.9e-08	120.92	0.997566	26.1291	3.67e-11	121.76		1	S	KTAARRQSYLRATQQSLGEQSNPRRSLDRLD	1208.5	3962.3	680.08	1668.2	1520.2	2744.5	1273	2696.1
B1AZP2	15	B1AZP2	B1AZP2	Disks large-associated protein 4	Dlgap4	sp|B1AZP2|DLGP4_MOUSE Disks large-associated protein 4 OS=Mus musculus OX=10090 GN=Dlgap4 PE=1 SV=1	0.96647	14.5975	3.44e-05	78.324	63.07	78.324	0.96647	14.5975	3.44e-05	78.324	0.887691	8.97847	0.00202764	44.415		1	S	_MKGLGDSRPRHLSDSLDPPHEPLFAGPDRN	302.56	993.07	1052.6	379.47	1021.5	417.86	459.23	751.27
B1AZP2	608	B1AZP2	B1AZP2	Disks large-associated protein 4	Dlgap4	sp|B1AZP2|DLGP4_MOUSE Disks large-associated protein 4 OS=Mus musculus OX=10090 GN=Dlgap4 PE=1 SV=1	0.955586	13.4571	9.98e-71	195.01	176.22	195.01					0.955586	13.4571	9.98e-71	195.01		1	S	QDHKSEVTSQSGLSNSSDSLDSSTRPPSVTR	0	0	0	0	0	0	0	0
B1AZP2	611	B1AZP2	B1AZP2	Disks large-associated protein 4	Dlgap4	sp|B1AZP2|DLGP4_MOUSE Disks large-associated protein 4 OS=Mus musculus OX=10090 GN=Dlgap4 PE=1 SV=1	0.967242	15.0329	1.47e-60	193.03	176.58	193.03	0.961116	16.5441	7.45e-21	121.52	0.967242	15.0329	1.47e-60	193.03		1	S	KSEVTSQSGLSNSSDSLDSSTRPPSVTRGGI	1159.5	1393.4	457.48	1140	1382.2	1273.3	1291.6	1546
B2KF50	746	B2KF50	B2KF50		Uhrf1bp1	tr|B2KF50|B2KF50_MOUSE UHRF1 (ICBP90) binding protein 1 OS=Mus musculus OX=10090 GN=Bltp3a PE=1 SV=1	0.906617	11.739	1.28e-117	236.18	220.28	236.18					0.906617	11.739	1.28e-117	236.18		1	S	RRLLLASEGRLKQSASFGSPVHSEALAPESV	0	0	0	0	0	0	0	0
B2KF50	749	B2KF50	B2KF50		Uhrf1bp1	tr|B2KF50|B2KF50_MOUSE UHRF1 (ICBP90) binding protein 1 OS=Mus musculus OX=10090 GN=Bltp3a PE=1 SV=1	0.593393	5.19313	6.36e-05	53.615	41.828	53.615					0.593393	5.19313	6.36e-05	53.615		1	S	LLASEGRLKQSASFGSPVHSEALAPESVSHQ	0	0	0	0	0	0	0	0
B2KF50	1098	B2KF50	B2KF50		Uhrf1bp1	tr|B2KF50|B2KF50_MOUSE UHRF1 (ICBP90) binding protein 1 OS=Mus musculus OX=10090 GN=Bltp3a PE=1 SV=1	0.845341	7.70449	0.000178888	63.827	41.294	63.827					0.845341	7.70449	0.000178888	63.827		1	S	ARLRFFSMKRTVSQQSFDGVSLDSGGPDDRI	0	0	0	0	0	0	0	0
B2KF50	929	B2KF50	B2KF50		Uhrf1bp1	tr|B2KF50|B2KF50_MOUSE UHRF1 (ICBP90) binding protein 1 OS=Mus musculus OX=10090 GN=Bltp3a PE=1 SV=1	0.999571	33.6758	0.000855032	91.355	59.293	91.355					0.999571	33.6758	0.000855032	91.355		1	S	SDQGAVSPEKVLRDGSGENLAASQERLPSDG	0	0	0	0	0	0	0	0
B2RPU8;Q9D1L0	41;41	B2RPU8	B2RPU8	Coiled-coil-helix-coiled-coil-helix domain-containing protein 2	Zbed5;Chchd2	tr|B2RPU8|B2RPU8_MOUSE Coiled-coil-helix-coiled-coil-helix domain containing 2-like OS=Mus musculus OX=10090 GN=Zbed5 PE=1 SV=1;sp|Q9D1L0|CHCH2_MOUSE Coiled-coil-helix-coiled-coil-helix domain-containing protein 2 OS=Mus musculus OX=10090 GN=Chchd2 PE=2 SV	0.5	0	0.000181299	59.9	35.108	59.9					0.5	0	0.000181299	59.9		1	S	PRRAPAAQPPAAAAPSAVGSPAAAPRQPGLM	0	0	0	0	0	0	0	0
B2RPU8;Q9D1L0	45;45	B2RPU8	B2RPU8	Coiled-coil-helix-coiled-coil-helix domain-containing protein 2	Zbed5;Chchd2	tr|B2RPU8|B2RPU8_MOUSE Coiled-coil-helix-coiled-coil-helix domain containing 2-like OS=Mus musculus OX=10090 GN=Zbed5 PE=1 SV=1;sp|Q9D1L0|CHCH2_MOUSE Coiled-coil-helix-coiled-coil-helix domain-containing protein 2 OS=Mus musculus OX=10090 GN=Chchd2 PE=2 SV	0.947648	12.5772	1.21e-08	89.381	77.253	89.381					0.947648	12.5772	1.21e-08	89.381		1	S	PAAQPPAAAAPSAVGSPAAAPRQPGLMAQMA	0	0	0	0	0	0	0	0
B2RQC6	1859	B2RQC6	B2RQC6	CAD protein;Glutamine-dependent carbamoyl-phosphate synthase;Aspartate carbamoyltransferase;Dihydroorotase	Cad	sp|B2RQC6|PYR1_MOUSE CAD protein OS=Mus musculus OX=10090 GN=Cad PE=1 SV=1	1	40.0246	2.03e-10	129.11	106.89	40.025	1	40.0246	0.000287691	74.519	1	68.129	2.03e-10	129.11		1	S	LPDGRFHLPPRIHRASDPGLPAEEPKEKPPR	1293.4	1501.5	1022.4	1166.4	822.79	1153.7	897.31	1077.2
B2RQG2	685	B2RQG2	B2RQG2		Phf3	tr|B2RQG2|B2RQG2_MOUSE PHD finger protein 3 OS=Mus musculus OX=10090 GN=Phf3 PE=1 SV=1	0.653507	0	9.04e-05	72.819	57.397	72.819					0.653507	0	9.04e-05	72.819		2	S	DNIATVKKEGSDQTTSIESKYMWTPSKQCGF	0	0	0	0	0	0	0	0
B2RQG2	688	B2RQG2	B2RQG2		Phf3	tr|B2RQG2|B2RQG2_MOUSE PHD finger protein 3 OS=Mus musculus OX=10090 GN=Phf3 PE=1 SV=1	0.653502	0	9.04e-05	72.819	57.397	72.819					0.653502	0	9.04e-05	72.819		2	S	ATVKKEGSDQTTSIESKYMWTPSKQCGFCKK	0	0	0	0	0	0	0	0
B2RQG2	282	B2RQG2	B2RQG2		Phf3	tr|B2RQG2|B2RQG2_MOUSE PHD finger protein 3 OS=Mus musculus OX=10090 GN=Phf3 PE=1 SV=1	0.973222	16.08	0.00454375	72.643	52.339	72.643					0.973222	16.08	0.00454375	72.643		1	S	KNIEALMECKAKTNSSPLFKFPVREDEQSDL	0	0	0	0	0	0	0	0
B2RT41	356	B2RT41	B2RT41		Zfc3h1	tr|B2RT41|B2RT41_MOUSE Zinc finger
B2RUJ5	317	B2RUJ5	B2RUJ5	Amyloid beta A4 precursor protein-binding family A member 1	Apba1	sp|B2RUJ5|APBA1_MOUSE Amyloid-beta A4 precursor protein-binding family A member 1 OS=Mus musculus OX=10090 GN=Apba1 PE=1 SV=2	1	48.9684	5.82e-21	135.08	118.58	48.968	1	48.9684	9.75e-09	94.08	1	52.402	5.82e-21	135.08		1;2	S	QDLERAPTPGGGHPDSPGLPAPAGQQQRVVG	1697.3	3600	2126.8	2427.6	2914.8	2673.6	1909.8	2427.5
B2RUJ5	286	B2RUJ5	B2RUJ5	Amyloid beta A4 precursor protein-binding family A member 1	Apba1	sp|B2RUJ5|APBA1_MOUSE Amyloid-beta A4 precursor protein-binding family A member 1 OS=Mus musculus OX=10090 GN=Apba1 PE=1 SV=2	0.971075	16.0329	0.00158459	76.522	52.773	76.522	0.971075	16.0329	0.00158459	76.522	0.923021	11.3724	0.00461908	66.023		1	S	EEDIDQIVAEVKQSMSSQSLDKAAEDMPEAE	2764.3	4514.8	930.64	1873.9	2834.4	2670.9	2120.9	3016.4
B2RUJ5	287	B2RUJ5	B2RUJ5	Amyloid beta A4 precursor protein-binding family A member 1	Apba1	sp|B2RUJ5|APBA1_MOUSE Amyloid-beta A4 precursor protein-binding family A member 1 OS=Mus musculus OX=10090 GN=Apba1 PE=1 SV=2	0.470488	0	0.00814408	57.836	33.044	57.836					0.470488	0	0.00814408	57.836			S	EDIDQIVAEVKQSMSSQSLDKAAEDMPEAEQ	0	0	0	0	0	0	0	0
B2RUJ5	289	B2RUJ5	B2RUJ5	Amyloid beta A4 precursor protein-binding family A member 1	Apba1	sp|B2RUJ5|APBA1_MOUSE Amyloid-beta A4 precursor protein-binding family A member 1 OS=Mus musculus OX=10090 GN=Apba1 PE=1 SV=2	0.998294	27.7344	4.19e-08	143.31	104.43	143.31	0.998294	27.7344	4.19e-08	143.31	0.862927	10.7606	0.00814408	57.836		1	S	IDQIVAEVKQSMSSQSLDKAAEDMPEAEQDL	8650	15779	1064.5	7223.8	9289.9	9048.3	8867.2	10672
B2RUJ5	82	B2RUJ5	B2RUJ5	Amyloid beta A4 precursor protein-binding family A member 1	Apba1	sp|B2RUJ5|APBA1_MOUSE Amyloid-beta A4 precursor protein-binding family A member 1 OS=Mus musculus OX=10090 GN=Apba1 PE=1 SV=2	0.46689	0	8.16e-150	258.44	232.72	258.44	0.46689	0	8.16e-150	258.44							S	PQEEEEEERGECLARSASTESGFHNHTDTAE	0	0	0	0	0	0	0	0
B2RUJ5	84	B2RUJ5	B2RUJ5	Amyloid beta A4 precursor protein-binding family A member 1	Apba1	sp|B2RUJ5|APBA1_MOUSE Amyloid-beta A4 precursor protein-binding family A member 1 OS=Mus musculus OX=10090 GN=Apba1 PE=1 SV=2	0.607141	4.63297	8.16e-150	258.44	232.72	137.09	0.607141	4.63297	8.16e-150	258.44	0.402695	0	1.16e-05	60.541		1	S	EEEEEERGECLARSASTESGFHNHTDTAEGD	928.75	965.52	956.95	290.74	903.1	417.83	406.02	736.15
B2RUJ5	87	B2RUJ5	B2RUJ5	Amyloid beta A4 precursor protein-binding family A member 1	Apba1	sp|B2RUJ5|APBA1_MOUSE Amyloid-beta A4 precursor protein-binding family A member 1 OS=Mus musculus OX=10090 GN=Apba1 PE=1 SV=2	0.881697	9.45005	1.08e-54	181.77	164.61	181.77	0.881697	9.45005	1.08e-54	181.77	0.402695	0	1.16e-05	60.541		1	S	EEERGECLARSASTESGFHNHTDTAEGDVLA	2322.3	3305.5	1901.4	1081.5	2323	1153	1674	2288.5
B2RUJ5	571	B2RUJ5	B2RUJ5	Amyloid beta A4 precursor protein-binding family A member 1	Apba1	sp|B2RUJ5|APBA1_MOUSE Amyloid-beta A4 precursor protein-binding family A member 1 OS=Mus musculus OX=10090 GN=Apba1 PE=1 SV=2	0.534332	0.776363	0.000887542	52.541	43.832	41.912	0.534332	0.776363	0.000887542	52.541						1	S	IGNIVVLMARRRMPRSNSQENVEASHPSQDG	389.1	1124.8	382.87	293.1	260.34	265.19	220.6	365.48
B2RUJ5	573	B2RUJ5	B2RUJ5	Amyloid beta A4 precursor protein-binding family A member 1	Apba1	sp|B2RUJ5|APBA1_MOUSE Amyloid-beta A4 precursor protein-binding family A member 1 OS=Mus musculus OX=10090 GN=Apba1 PE=1 SV=2	0.878456	8.59357	9.06e-08	118.16	102.27	76.85	0.848749	7.49082	9.06e-08	118.16	0.878456	8.59357	6.82e-05	87.326		1	S	NIVVLMARRRMPRSNSQENVEASHPSQDGKR	2228.7	4134.6	443.95	2264.6	1770	2994.3	950.06	2864.4
B2RUJ5	372	B2RUJ5	B2RUJ5	Amyloid beta A4 precursor protein-binding family A member 1	Apba1	sp|B2RUJ5|APBA1_MOUSE Amyloid-beta A4 precursor protein-binding family A member 1 OS=Mus musculus OX=10090 GN=Apba1 PE=1 SV=2	0.538272	0.666155	0.000848664	86.624	60.686	86.624					0.538272	0.666155	0.000848664	86.624		1	S	DIKEAIEEVKTRTIRSPYTPDEPKEPIWVMR	0	0	0	0	0	0	0	0
B2RUR8	100	B2RUR8	B2RUR8	OTU domain-containing protein 7B	Otud7b	sp|B2RUR8|OTU7B_MOUSE OTU domain-containing protein 7B OS=Mus musculus OX=10090 GN=Otud7b PE=1 SV=1	0.992378	26.0251	0.00208414	58.32	25.095	58.32					0.992378	26.0251	0.00208414	58.32		1	S	RQDDVIQEKRLSRGISHASSSIVSLARSHVS	0	0	0	0	0	0	0	0
B2RUR8	464	B2RUR8	B2RUR8	OTU domain-containing protein 7B	Otud7b	sp|B2RUR8|OTU7B_MOUSE OTU domain-containing protein 7B OS=Mus musculus OX=10090 GN=Otud7b PE=1 SV=1	0.541447	0.792957	2.67e-06	62.683	51.682	62.683	0.541447	0.792957	2.67e-06	62.683						1	S	SPTASAGDEPRSTPESGESDKESVGSSSLGN	1258	1491.8	4147.8	1294.6	1179.9	1315.5	1062.9	674.09
B2RW11	448	B2RW11	B2RW11		Ankrd34a	tr|B2RW11|B2RW11_MOUSE Ankyrin repeat domain 34A OS=Mus musculus OX=10090 GN=Ankrd34a PE=1 SV=1	0.792553	5.55942	0.0332418	53.453	40.04	53.453	0.792553	5.55942	0.0332418	53.453						2	S	PPIPDIRPQPGGRAPSLPAPPPSGAPGSPRT	0	0	0	0	0	0	0	0
B2RW11	460	B2RW11	B2RW11		Ankrd34a	tr|B2RW11|B2RW11_MOUSE Ankyrin repeat domain 34A OS=Mus musculus OX=10090 GN=Ankrd34a PE=1 SV=1	0.999028	30.1172	6.3e-56	196.71	156.33	137.61	0.999028	30.1172	6.3e-15	137.61	0.997453	25.9279	6.3e-56	196.71		1;2	S	RAPSLPAPPPSGAPGSPRTKRKLVRRHSMQT	2875	3299.3	2134.3	2813.7	1567.9	2235.2	1541.4	2038.9
B2RW11	149	B2RW11	B2RW11		Ankrd34a	tr|B2RW11|B2RW11_MOUSE Ankyrin repeat domain 34A OS=Mus musculus OX=10090 GN=Ankrd34a PE=1 SV=1	0.83706	7.74057	3.13e-79	221.59	192.63	91.589	0.537127	5.71918	0.000180056	65.097	0.83706	7.74057	3.13e-79	221.59		1	S	CKAKGTEVIIITTDTSPSGTKKTRQYLNSPP	348.19	223.19	0	217.55	193.98	398.42	235.89	448.4
B2RW11	391	B2RW11	B2RW11		Ankrd34a	tr|B2RW11|B2RW11_MOUSE Ankyrin repeat domain 34A OS=Mus musculus OX=10090 GN=Ankrd34a PE=1 SV=1	0.999829	37.8444	1.15e-06	118.21	97.778	118.21	0.966863	15.1884	0.000684217	66.335	0.999829	37.8444	1.15e-06	118.21		1	S	VSSPRQSQESLPGAVSPLSGRRRSPGLLERR	614.45	1174.2	1251.9	1207.5	334.16	1368.1	531.21	784.84
B2RW11	408	B2RW11	B2RW11		Ankrd34a	tr|B2RW11|B2RW11_MOUSE Ankyrin repeat domain 34A OS=Mus musculus OX=10090 GN=Ankrd34a PE=1 SV=1	0.776186	5.40084	0.000394491	64.249	49.087	64.249					0.776186	5.40084	0.000394491	64.249		1	S	LSGRRRSPGLLERRGSGTLLLDHISQTRPGF	0	0	0	0	0	0	0	0
B2RW11	290	B2RW11	B2RW11		Ankrd34a	tr|B2RW11|B2RW11_MOUSE Ankyrin repeat domain 34A OS=Mus musculus OX=10090 GN=Ankrd34a PE=1 SV=1	0.880449	8.6715	1.24e-05	108.18	90.263	108.18	0.806763	6.20655	0.000184553	80.236	0.880449	8.6715	1.24e-05	108.18		1	S	NGLTLTGRPRLSRRHSTEGPEDPPPWAEKVT	3700.9	4724.2	2645.5	3425.4	3057.1	4408.5	2470.6	3813.1
B2RWS6	1037	B2RWS6	B2RWS6	Histone acetyltransferase p300	Ep300	sp|B2RWS6|EP300_MOUSE Histone acetyltransferase p300 OS=Mus musculus OX=10090 GN=Ep300 PE=1 SV=2	0.596129	1.69422	2.56e-34	161.24	142.54	161.24					0.596129	1.69422	2.56e-34	161.24		1	S	GKEEEEQPSTSATQSSPAPGQSKKKIFKPEE	0	0	0	0	0	0	0	0
B2RXC2	247	B2RXC2	B2RXC2		Itpkb	tr|B2RXC2|B2RXC2_MOUSE Kinase OS=Mus musculus OX=10090 GN=Itpkb PE=1 SV=1	0.904711	9.77467	0.00727736	48.14	36.275	48.14	0.904711	9.77467	0.00727736	48.14						1	S	PSKDKEGVAPLLGPASPTRLGTQSPSTSVRM	199.46	376.15	0	192.82	270.87	209.3	209.49	216.23
B2RXE2	570	B2RXE2	B2RXE2	Sodium/hydrogen exchanger	Slc9a5	sp|B2RXE2|SL9A5_MOUSE Sodium/hydrogen exchanger 5 OS=Mus musculus OX=10090 GN=Slc9a5 PE=1 SV=1	0.947114	12.7672	4.51e-05	98.676	73.823	98.676					0.947114	12.7672	4.51e-05	98.676		1	S	LTLPSMPSRNSVAETSVTNLLRESGSGACLD	0	0	0	0	0	0	0	0
B2RXQ2	150	B2RXQ2	B2RXQ2		Ppfia1	tr|B2RXQ2|B2RXQ2_MOUSE Ppfia1 protein OS=Mus musculus OX=10090 GN=Ppfia1 PE=1 SV=1	0.988236	22.2532	0.000197721	96.163	68.828	96.163					0.988236	22.2532	0.000197721	96.163		1	S	HERSLRMTVVKRQAQSPAGVSSEVEVLKALK	0	0	0	0	0	0	0	0
B2RXQ2	238	B2RXQ2	B2RXQ2		Ppfia1	tr|B2RXQ2|B2RXQ2_MOUSE Ppfia1 protein OS=Mus musculus OX=10090 GN=Ppfia1 PE=1 SV=1	0.49736	0	0.00554068	63.894	28.67	63.894					0.49736	0	0.00554068	63.894			S	GNHEQESAPSTNGKRSSDGSLSHEDLAKVLE	0	0	0	0	0	0	0	0
B2RXQ2	239	B2RXQ2	B2RXQ2		Ppfia1	tr|B2RXQ2|B2RXQ2_MOUSE Ppfia1 protein OS=Mus musculus OX=10090 GN=Ppfia1 PE=1 SV=1	0.49736	0	0.00554068	63.894	28.67	63.894					0.49736	0	0.00554068	63.894			S	NHEQESAPSTNGKRSSDGSLSHEDLAKVLEL	0	0	0	0	0	0	0	0
B2RXQ2	244	B2RXQ2	B2RXQ2		Ppfia1	tr|B2RXQ2|B2RXQ2_MOUSE Ppfia1 protein OS=Mus musculus OX=10090 GN=Ppfia1 PE=1 SV=1	0.393036	1.26178	0.000221429	83.968	66.051	83.968					0.393036	1.26178	0.000221429	83.968			S	SAPSTNGKRSSDGSLSHEDLAKVLELQEVID	0	0	0	0	0	0	0	0
B2RY56	672	B2RY56	B2RY56	RNA-binding protein 25	Rbm25	sp|B2RY56|RBM25_MOUSE RNA-binding protein 25 OS=Mus musculus OX=10090 GN=Rbm25 PE=1 SV=2	0.995849	24.9083	0.000109468	97.551	79.391	97.551	0.995849	24.9083	0.000109468	97.551	0.737694	6.06435	0.000456976	79.771		1	S	HRPKIGLSLKLGASNSPGQPNSVKRKKLPVD	1692.5	3353	736.83	2826.6	1804.2	2607.3	1283.9	1964.1
B5TVM2	636	B5TVM2	B5TVM2	Immunoglobulin-like domain-containing receptor 2	Ildr2	sp|B5TVM2|ILDR2_MOUSE Immunoglobulin-like domain-containing receptor 2 OS=Mus musculus OX=10090 GN=Ildr2 PE=1 SV=2	0.615877	2.1049	0.00728845	50.149	33.896	50.149	0.615877	2.1049	0.00728845	50.149						1	S	LSRGPSYRGRDLSFHSNSEKRRKKEPAKKPG	510.84	1226.2	295.55	676.33	409.97	661.71	356.9	575.07
B5TVM2	562	B5TVM2	B5TVM2	Immunoglobulin-like domain-containing receptor 2	Ildr2	sp|B5TVM2|ILDR2_MOUSE Immunoglobulin-like domain-containing receptor 2 OS=Mus musculus OX=10090 GN=Ildr2 PE=1 SV=2	0.99044	21.2034	0.000138174	104.22	70.355	90.05	0.99044	21.2034	0.000138174	104.22						1	S	VLERQARPESSSRGGSLETPSKLGAQLGPRS	8126.9	7459.4	3762.4	6212.1	7635.5	4676.3	6681.6	5408.5
B5TVM2	511	B5TVM2	B5TVM2	Immunoglobulin-like domain-containing receptor 2	Ildr2	sp|B5TVM2|ILDR2_MOUSE Immunoglobulin-like domain-containing receptor 2 OS=Mus musculus OX=10090 GN=Ildr2 PE=1 SV=2	0.999619	34.1933	1.93e-08	144.47	121.1	104.22	0.99723	25.5639	1.93e-08	144.47	0.999619	34.1933	1.1e-05	104.22		1	S	RSREPPGDGERGWTYSPAPARRRPPEDAPLP	2910.3	4255.5	2056.3	3896.3	2582.4	3585.2	1852.3	2305.9
B5TVM2	584	B5TVM2	B5TVM2	Immunoglobulin-like domain-containing receptor 2	Ildr2	sp|B5TVM2|ILDR2_MOUSE Immunoglobulin-like domain-containing receptor 2 OS=Mus musculus OX=10090 GN=Ildr2 PE=1 SV=2	0.946685	15.5715	0.00436979	50.292	33.719	50.292	0.946685	15.5715	0.00436979	50.292						1	S	LGAQLGPRSASYYAWSPPTTYKAGASEGEDE	519.31	483.06	482.65	317.41	188.43	221.32	315.83	291.1
B8QI36	682	B8QI36	B8QI36		Ppfia4	tr|B8QI36|B8QI36_MOUSE Liprin-alpha 4 OS=Mus musculus OX=10090 GN=Ppfia4 PE=1 SV=1	0.989384	19.6938	0.00110108	104.44	8.6955	104.44					0.989384	19.6938	0.00110108	104.44		1	S	MTLPSDLRKHRRKLLSPVSREENREDKATIK	0	0	0	0	0	0	0	0
B8QI36;Q8BSS9	140;163	B8QI36;Q8BSS9	Q8BSS9	Liprin-alpha-2	Ppfia4;Ppfia2	tr|B8QI36|B8QI36_MOUSE Liprin-alpha 4 OS=Mus musculus OX=10090 GN=Ppfia4 PE=1 SV=1;sp|Q8BSS9|LIPA2_MOUSE Liprin-alpha-2 OS=Mus musculus OX=10090 GN=Ppfia2 PE=1 SV=2	0.999678	35.2307	2.23e-47	192.16	146.88	86.378	0.850873	7.58768	0.000464943	78.932	0.999678	35.2307	2.23e-47	192.16		1	S	HERSLRMTVVKRQAQSPSGVSSEVEVLKALK	1599.5	1733.6	1112.4	1617.1	903.82	1347	1311.1	1578.9
B9EHT4	399	B9EHT4	B9EHT4	CAP-Gly domain-containing linker protein 3	Clip3	sp|B9EHT4|CLIP3_MOUSE CAP-Gly domain-containing linker protein 3 OS=Mus musculus OX=10090 GN=Clip3 PE=1 SV=1	0.995653	26.6113	3.6e-46	199.8	144.45	199.8	0.995653	26.6113	3.6e-46	199.8	0.822207	7.07789	3.37e-36	186.51		1	S	RVTGKGRREHKGKKKSPSSPSLGSLQQREGA	1652.6	1958.5	421.72	1838.5	2205	2221.4	2040.5	3004.6
B9EHT4	402	B9EHT4	B9EHT4	CAP-Gly domain-containing linker protein 3	Clip3	sp|B9EHT4|CLIP3_MOUSE CAP-Gly domain-containing linker protein 3 OS=Mus musculus OX=10090 GN=Clip3 PE=1 SV=1	0.997111	27.7406	5.64e-36	182.1	133.36	182.1	0.971163	16.8071	3.45e-11	122.46	0.997111	27.7406	5.64e-36	182.1		1	S	GKGRREHKGKKKSPSSPSLGSLQQREGAKAE	1556.2	2087.1	1068	1541.2	1248	1467.7	860.19	1532.9
B9EJ80	968	B9EJ80	B9EJ80		Pdzd8	sp|B9EJ80|PDZD8_MOUSE PDZ domain-containing protein 8 OS=Mus musculus OX=10090 GN=Pdzd8 PE=1 SV=1	0.245431	0	0.00144382	45.395	29.089	45.395	0.245431	0	0.00144382	45.395							S	GTDLVEPSPKHTPNTSDNEGSDTEVCGSNSP	0	0	0	0	0	0	0	0
B9EJ80	973	B9EJ80	B9EJ80		Pdzd8	sp|B9EJ80|PDZD8_MOUSE PDZ domain-containing protein 8 OS=Mus musculus OX=10090 GN=Pdzd8 PE=1 SV=1	0.245431	0	0.00144382	45.395	29.089	45.395	0.245431	0	0.00144382	45.395							S	EPSPKHTPNTSDNEGSDTEVCGSNSPSKRGN	0	0	0	0	0	0	0	0
B9EJ80	532	B9EJ80	B9EJ80		Pdzd8	sp|B9EJ80|PDZD8_MOUSE PDZ domain-containing protein 8 OS=Mus musculus OX=10090 GN=Pdzd8 PE=1 SV=1	1	40.5891	0.040059	40.589	34.505	40.589					1	40.5891	0.040059	40.589		1	S	KRTPTTLSIKPLGAISPVLNRKLISGIHPPP	0	0	0	0	0	0	0	0
B9EJ86	65	B9EJ86	B9EJ86	Oxysterol-binding protein	Osbpl8	sp|B9EJ86|OSBL8_MOUSE Oxysterol-binding protein-related protein 8 OS=Mus musculus OX=10090 GN=Osbpl8 PE=1 SV=1	0.955666	13.9978	1.93e-05	83.245	73.323	75.646	0.955666	13.9978	4.27e-05	75.646	0.892295	9.26458	1.93e-05	83.245		1	S	DANPTPTRDLPQPSLSPASLHSQGFERGKED	113.67	173.71	257.89	193.02	91.348	154.11	129.97	0
B9EJ86	328	B9EJ86	B9EJ86	Oxysterol-binding protein	Osbpl8	sp|B9EJ86|OSBL8_MOUSE Oxysterol-binding protein-related protein 8 OS=Mus musculus OX=10090 GN=Osbpl8 PE=1 SV=1	1	91.9373	0.00142262	91.937	49.542	91.937	1	91.9373	0.00142262	91.937						1	S	DSEIERQHFKDQDLYSDKSDKENDPEHDESD	768.99	1841.8	308.16	1151.1	1962.3	1345.5	1121.7	2033.8
B9EJ86	807	B9EJ86	B9EJ86	Oxysterol-binding protein	Osbpl8	sp|B9EJ86|OSBL8_MOUSE Oxysterol-binding protein-related protein 8 OS=Mus musculus OX=10090 GN=Osbpl8 PE=1 SV=1	0.444523	0	4.45e-07	75.174	60.243	75.174					0.444523	0	4.45e-07	75.174			S	KVVKGYSSPEPDIQDSSGSEAQSVKPSTRRK	0	0	0	0	0	0	0	0
B9EJ86	808	B9EJ86	B9EJ86	Oxysterol-binding protein	Osbpl8	sp|B9EJ86|OSBL8_MOUSE Oxysterol-binding protein-related protein 8 OS=Mus musculus OX=10090 GN=Osbpl8 PE=1 SV=1	0.444523	0	4.45e-07	75.174	60.243	75.174					0.444523	0	4.45e-07	75.174			S	VVKGYSSPEPDIQDSSGSEAQSVKPSTRRKK	0	0	0	0	0	0	0	0
B9EJA2	472	B9EJA2	B9EJA2	Cortactin-binding protein 2	Cttnbp2	sp|B9EJA2|CTTB2_MOUSE Cortactin-binding protein 2 OS=Mus musculus OX=10090 GN=Cttnbp2 PE=1 SV=2	0.81503	7.14031	0.00104069	61.641	48.763	61.641	0.81503	7.14031	0.00104069	61.641						1	S	DQNGNNTQSPPSRDVSPTSRDNLVAKQLARN	3273.5	2908.3	2384	4515.2	417.87	1985.8	1187.2	2696.2
B9EJA2	576	B9EJA2	B9EJA2	Cortactin-binding protein 2	Cttnbp2	sp|B9EJA2|CTTB2_MOUSE Cortactin-binding protein 2 OS=Mus musculus OX=10090 GN=Cttnbp2 PE=1 SV=2	0.884659	11.9193	0.00270982	56.122	25.868	56.122					0.884659	11.9193	0.00270982	56.122		1	S	RASNAGAKVDNKIVASPPSTLPQGTKVVNEE	0	0	0	0	0	0	0	0
B9EJA2	579	B9EJA2	B9EJA2	Cortactin-binding protein 2	Cttnbp2	sp|B9EJA2|CTTB2_MOUSE Cortactin-binding protein 2 OS=Mus musculus OX=10090 GN=Cttnbp2 PE=1 SV=2	0.394715	0	0.0138511	43.308	18.532	43.308	0.394715	0	0.0138511	43.308							S	NAGAKVDNKIVASPPSTLPQGTKVVNEENVP	0	0	0	0	0	0	0	0
B9EJA2	359	B9EJA2	B9EJA2	Cortactin-binding protein 2	Cttnbp2	sp|B9EJA2|CTTB2_MOUSE Cortactin-binding protein 2 OS=Mus musculus OX=10090 GN=Cttnbp2 PE=1 SV=2	0.531108	1.3525	6.69e-09	102.95	90.745	102.95					0.531108	1.3525	6.69e-09	102.95		1	S	VGPSALLIRPGIDRQSSHSDLGPSPPTALPS	0	0	0	0	0	0	0	0
B9EJA2	360	B9EJA2	B9EJA2	Cortactin-binding protein 2	Cttnbp2	sp|B9EJA2|CTTB2_MOUSE Cortactin-binding protein 2 OS=Mus musculus OX=10090 GN=Cttnbp2 PE=1 SV=2	0.686859	3.8786	2.26e-07	88.73	78.033	88.73	0.686859	3.8786	2.26e-07	88.73						1	S	GPSALLIRPGIDRQSSHSDLGPSPPTALPSS	658.7	1218.7	381.89	935.29	562.36	1222.5	478.9	560.79
B9EJX2	715	B9EJX2	B9EJX2		Nhs	tr|B9EJX2|B9EJX2_MOUSE NHS actin remodeling regulator OS=Mus musculus OX=10090 GN=Nhs PE=1 SV=1	1	49.5005	0.0615236	49.5	15.122	49.5					1	49.5005	0.0615236	49.5		1	S	NYLHHHHDASCRQDFSPERPKADSLGCPSFT	0	0	0	0	0	0	0	0
B9EKI3	340	B9EKI3	B9EKI3	TATA element modulatory factor	Tmf1	sp|B9EKI3|TMF1_MOUSE TATA element modulatory factor OS=Mus musculus OX=10090 GN=Tmf1 PE=1 SV=2	0.999959	43.8538	6.17e-07	114.74	97.042	114.74	0.999428	32.9657	0.00755259	47.938	0.999959	43.8538	6.17e-07	114.74		1	S	FSVQSLDSRSVSEINSDDELPGKGYALVPII	471.54	457.2	395.68	532.71	422.18	774.64	398.57	432.04
B9EKR1	1097	B9EKR1	B9EKR1	Receptor-type tyrosine-protein phosphatase zeta	Ptprz1	sp|B9EKR1|PTPRZ_MOUSE Receptor-type tyrosine-protein phosphatase zeta OS=Mus musculus OX=10090 GN=Ptprz1 PE=1 SV=1	0.64787	1.07665	0.0488773	46.73	15.299	46.73	0.64787	1.07665	0.0488773	46.73						2	S	MSDVVHKWSESLKETSVSISSMKSVFPESLV	0	0	0	0	0	0	0	0
B9EKR1	1099	B9EKR1	B9EKR1	Receptor-type tyrosine-protein phosphatase zeta	Ptprz1	sp|B9EKR1|PTPRZ_MOUSE Receptor-type tyrosine-protein phosphatase zeta OS=Mus musculus OX=10090 GN=Ptprz1 PE=1 SV=1	0.789467	3.43285	0.0488773	46.73	15.299	46.73	0.789467	3.43285	0.0488773	46.73						2	S	DVVHKWSESLKETSVSISSMKSVFPESLVYP	0	0	0	0	0	0	0	0
B9EKR1	576	B9EKR1	B9EKR1	Receptor-type tyrosine-protein phosphatase zeta	Ptprz1	sp|B9EKR1|PTPRZ_MOUSE Receptor-type tyrosine-protein phosphatase zeta OS=Mus musculus OX=10090 GN=Ptprz1 PE=1 SV=1	0.999999	59.04	1.06e-79	221.85	195.14	221.85	0.99505	23.5714	8.36e-05	85.974	0.999999	59.04	1.06e-79	221.85		1	S	NTVPITEYKEVSADVSEEENFLTDFKLDTGA	1173.6	1909.2	118.8	1092.8	1600.5	1275.6	1392.7	1606.3
B9EKR1	647	B9EKR1	B9EKR1	Receptor-type tyrosine-protein phosphatase zeta	Ptprz1	sp|B9EKR1|PTPRZ_MOUSE Receptor-type tyrosine-protein phosphatase zeta OS=Mus musculus OX=10090 GN=Ptprz1 PE=1 SV=1	0.61741	2.09385	5.18e-22	149.73	121.77	149.73	0.61741	2.09385	5.18e-22	149.73						1	S	PGSTRNAPEDSAPSGSEESLKDPSLEGSVWF	2059.5	2497.5	237.99	2057.2	1466.1	1898.7	1997	1916.1
D3YTP3	311	D3YTP3	D3YTP3		Mtx3	tr|D3YTP3|D3YTP3_MOUSE Metaxin OS=Mus musculus OX=10090 GN=Mtx3 PE=1 SV=2	1	70.9728	1.8e-15	142.85	126.96	142.85	1	70.9728	1.8e-15	142.85	0.999999	61.8791	8.85e-07	119.01		1	S	KLTPAEEESNSLQLLSP______________	404.55	530.24	478.02	421.58	443.24	273.34	192.1	411.82
D3YTP3	284	D3YTP3	D3YTP3		Mtx3	tr|D3YTP3|D3YTP3_MOUSE Metaxin OS=Mus musculus OX=10090 GN=Mtx3 PE=1 SV=2	1	86.3444	6.59e-11	127.22	108.38	86.344	1	43.3824	0.00128148	58.671	1	86.3444	6.59e-11	127.22		1	S	KESNLIEKMDGNLRQSPQLLPRKLPTLKLTP	1174.1	1255.6	786.97	1208.2	595.76	1153.4	693.31	597.18
D3YUB6	1295	D3YUB6	D3YUB6	BTB/POZ domain-containing protein 8	Btbd8	sp|D3YUB6|BTBD8_MOUSE BTB/POZ domain-containing protein 8 OS=Mus musculus OX=10090 GN=Btbd8 PE=1 SV=2	0.625456	2.22693	5.08e-05	78.413	66.498	78.413	0.625456	2.22693	5.08e-05	78.413	0.546747	0.814464	0.00161645	47.392		1	S	EVRVRKQGGGDHQIHSASDDEIPRKKPEPWS	429.29	934.28	356.34	575.54	569.03	652.39	140.1	364.34
D3YUB6	1297	D3YUB6	D3YUB6	BTB/POZ domain-containing protein 8	Btbd8	sp|D3YUB6|BTBD8_MOUSE BTB/POZ domain-containing protein 8 OS=Mus musculus OX=10090 GN=Btbd8 PE=1 SV=2	0.942229	12.1245	3.98e-41	178.88	162.74	178.88	0.942229	12.1245	3.98e-41	178.88	0.5	0	0.00583084	42.789		1	S	RVRKQGGGDHQIHSASDDEIPRKKPEPWSRS	3597.3	6401.5	3744.9	5397.4	3237.7	4816.9	2694	4419.4
D3YUB6	1563	D3YUB6	D3YUB6	BTB/POZ domain-containing protein 8	Btbd8	sp|D3YUB6|BTBD8_MOUSE BTB/POZ domain-containing protein 8 OS=Mus musculus OX=10090 GN=Btbd8 PE=1 SV=2	0.952691	13.5364	0.000246072	78.932	63.36	78.932	0.952691	13.5364	0.000246072	78.932						1	S	QRELSSNIPKISSVKSLDSCPSQGLPQEGQV	982.17	1590.4	247.94	1134.5	801.83	623.41	471.24	630.29
D3YUB6	1262	D3YUB6	D3YUB6	BTB/POZ domain-containing protein 8	Btbd8	sp|D3YUB6|BTBD8_MOUSE BTB/POZ domain-containing protein 8 OS=Mus musculus OX=10090 GN=Btbd8 PE=1 SV=2	0.980651	18.1513	5.3e-34	186.17	160.73	186.17	0.980651	18.1513	5.3e-34	186.17						1	S	KCSTALCHDFLGRSSSDTSTPEELKVHEGDL	4010.1	6931.1	1086.9	4864	3050	3514.6	2146.5	3816.8
D3YUB6	729	D3YUB6	D3YUB6	BTB/POZ domain-containing protein 8	Btbd8	sp|D3YUB6|BTBD8_MOUSE BTB/POZ domain-containing protein 8 OS=Mus musculus OX=10090 GN=Btbd8 PE=1 SV=2	0.499134	0	8.61e-06	92.211	66.493	92.211	0.499072	0	8.91e-05	74.76	0.499134	0	8.61e-06	92.211			S	GPSSRSTHSSTELLASMGSVDETKENGSVED	0	0	0	0	0	0	0	0
D3YUB6	732	D3YUB6	D3YUB6	BTB/POZ domain-containing protein 8	Btbd8	sp|D3YUB6|BTBD8_MOUSE BTB/POZ domain-containing protein 8 OS=Mus musculus OX=10090 GN=Btbd8 PE=1 SV=2	0.945244	12.4513	2.02e-10	121.82	96.097	120.23	0.945244	12.4513	2.02e-10	121.82	0.499134	0	8.61e-06	92.211		1	S	SRSTHSSTELLASMGSVDETKENGSVEDKCR	5603.4	8695.4	1081.8	5419	3432.5	5080.1	2107.4	6268.6
D3YUJ3	350	D3YUJ3	D3YUJ3		Ccnyl1	tr|D3YUJ3|D3YUJ3_MOUSE Cyclin Y-like 1 OS=Mus musculus OX=10090 GN=Ccnyl1 PE=1 SV=1	0.948781	12.6774	1.14e-07	112.03	98.895	67.275	0.926325	10.9944	1.14e-07	112.03	0.948781	12.6774	0.000935363	67.275		1	S	CEDKYKDLCRAAMRRSLSADNFIGIQRSNAI	773.28	563.37	713.17	828.34	168.8	875.86	427.8	462.04
D3YUJ3	352	D3YUJ3	D3YUJ3		Ccnyl1	tr|D3YUJ3|D3YUJ3_MOUSE Cyclin Y-like 1 OS=Mus musculus OX=10090 GN=Ccnyl1 PE=1 SV=1	0.998695	28.8371	9.78e-57	214.46	181.6	84.289	0.998695	28.8371	9.78e-57	214.46	0.753485	4.85231	3.63e-10	131.36		1	S	DKYKDLCRAAMRRSLSADNFIGIQRSNAILS	22404	25973	21291	22167	19600	21734	17499	17820
D3YV10	606	D3YV10	D3YV10	Coiled-coil domain-containing protein 13	Ccdc13	sp|D3YV10|CCD13_MOUSE Coiled-coil domain-containing protein 13 OS=Mus musculus OX=10090 GN=Ccdc13 PE=1 SV=1	1	57.8017	0.0106476	57.802	21.356	57.802					1	57.8017	0.0106476	57.802		3	S	AVLLEQHLEKMRLEPSRASVSQKTKNKPGPP	0	0	0	0	0	0	0	0
D3YV10	609	D3YV10	D3YV10	Coiled-coil domain-containing protein 13	Ccdc13	sp|D3YV10|CCD13_MOUSE Coiled-coil domain-containing protein 13 OS=Mus musculus OX=10090 GN=Ccdc13 PE=1 SV=1	1	57.8017	0.0106476	57.802	21.356	57.802					1	57.8017	0.0106476	57.802		3	S	LEQHLEKMRLEPSRASVSQKTKNKPGPPAAN	0	0	0	0	0	0	0	0
D3YV10	611	D3YV10	D3YV10	Coiled-coil domain-containing protein 13	Ccdc13	sp|D3YV10|CCD13_MOUSE Coiled-coil domain-containing protein 13 OS=Mus musculus OX=10090 GN=Ccdc13 PE=1 SV=1	1	57.8017	0.0106476	57.802	21.356	57.802					1	57.8017	0.0106476	57.802		3	S	QHLEKMRLEPSRASVSQKTKNKPGPPAANTK	0	0	0	0	0	0	0	0
D3YVE8	409	D3YVE8	D3YVE8	Solute carrier family 35 member G2	Slc35g2	sp|D3YVE8|S35G2_MOUSE Solute carrier family 35 member G2 OS=Mus musculus OX=10090 GN=Slc35g2 PE=1 SV=1	1	59.1845	1.66e-122	258.42	184.54	59.185	1	59.1845	5.06e-08	117.4	1	258.419	1.66e-122	258.42		1	S	YWRNVRREDYQEILDSPIK____________	1443.4	1234.3	956.47	1160.7	1280.4	1306.1	1600.9	1101.2
D3YVF0	171	D3YVF0	D3YVF0	A-kinase anchor protein 5	Akap5	sp|D3YVF0|AKAP5_MOUSE A-kinase anchor protein 5 OS=Mus musculus OX=10090 GN=Akap5 PE=1 SV=2	0.836153	7.07847	9.63e-27	151.53	133.26	151.53	0.5	0	8.27e-08	84.097	0.836153	7.07847	9.63e-27	151.53		1	S	IKAQTQPDDQAIQAGSTQGLQEGVLVRDGKK	0	193.5	0	0	0	0	0	0
D3YVF0	242	D3YVF0	D3YVF0	A-kinase anchor protein 5	Akap5	sp|D3YVF0|AKAP5_MOUSE A-kinase anchor protein 5 OS=Mus musculus OX=10090 GN=Akap5 PE=1 SV=2	0.999274	36.1615	0.0221378	41.052	33.655	41.052	0.999274	36.1615	0.0221378	41.052						1	S	TKVITEKPSVQTQRASLLESSAAGSPRSVTS	370.92	684.52	142.04	261.79	388.08	341.81	371.01	318.76
D3YVF0	251	D3YVF0	D3YVF0	A-kinase anchor protein 5	Akap5	sp|D3YVF0|AKAP5_MOUSE A-kinase anchor protein 5 OS=Mus musculus OX=10090 GN=Akap5 PE=1 SV=2	1	97.3864	1.42e-166	278.84	255.96	278.84	1	97.3864	1.42e-166	278.84	1	83.6936	6.62e-104	240.92		1	S	VQTQRASLLESSAAGSPRSVTSAAPPSPATT	44356	50884	40168	29338	35161	34600	25435	35322
D3YVF0	22	D3YVF0	D3YVF0	A-kinase anchor protein 5	Akap5	sp|D3YVF0|AKAP5_MOUSE A-kinase anchor protein 5 OS=Mus musculus OX=10090 GN=Akap5 PE=1 SV=2	1	96.3419	0.000148005	96.342	69.669	96.342	1	96.3419	0.000148005	96.342	1	94.6921	0.000266956	94.692		1	S	EIQVETKDEKGPVAASPQKERQERKTATLCF	20337	28134	1480.4	17607	24239	13547	30537	16848
D3YVF0	142	D3YVF0	D3YVF0	A-kinase anchor protein 5	Akap5	sp|D3YVF0|AKAP5_MOUSE A-kinase anchor protein 5 OS=Mus musculus OX=10090 GN=Akap5 PE=1 SV=2	0.999986	48.4998	5.88e-07	107.45	94.188	107.45	0.999986	48.4998	5.88e-07	107.45						1	S	SRGAKRSRHSKLTEDSGYVRVQGEADDLEIK	0	0	0	0	0	0	0	0
D3YVF0	79	D3YVF0	D3YVF0	A-kinase anchor protein 5	Akap5	sp|D3YVF0|AKAP5_MOUSE A-kinase anchor protein 5 OS=Mus musculus OX=10090 GN=Akap5 PE=1 SV=2	1	113.24	6.3e-06	113.24	77.729	113.24	1	113.24	6.3e-06	113.24	1	47.559	0.0215812	47.559		1	S	EAGGSGQRQPAGAWASIKGLVTHRKRSEPAK	5045.2	7124.7	5151.5	7472.8	4298.7	5702.4	2858	4330.7
D3YVF0	262	D3YVF0	D3YVF0	A-kinase anchor protein 5	Akap5	sp|D3YVF0|AKAP5_MOUSE A-kinase anchor protein 5 OS=Mus musculus OX=10090 GN=Akap5 PE=1 SV=2	0.31906	0	8.4e-11	90.475	71.265	90.475					0.31906	0	8.4e-11	90.475			S	SAAGSPRSVTSAAPPSPATTHQHSLEEPSNG	0	0	0	0	0	0	0	0
D3YVF0	270	D3YVF0	D3YVF0	A-kinase anchor protein 5	Akap5	sp|D3YVF0|AKAP5_MOUSE A-kinase anchor protein 5 OS=Mus musculus OX=10090 GN=Akap5 PE=1 SV=2	0.996801	29.208	1.2e-25	143.07	130.39	104.48	0.992954	22.4908	1.2e-25	143.07	0.996801	29.208	3.11e-14	104.48		1	S	VTSAAPPSPATTHQHSLEEPSNGIRESAPSG	891.78	862.35	640.04	573.26	497	591.59	184.64	419.81
D3YVL2	400	D3YVL2	D3YVL2		Cfap70	sp|D3YVL2|CFA70_MOUSE Cilia- and flagella-associated protein 70 OS=Mus musculus OX=10090 GN=Cfap70 PE=1 SV=2	0.983467	17.744	0.00138961	78.342	46.969	78.342					0.983467	17.744	0.00138961	78.342		1	S	TGHHLVQNNKAGGLNSPLSKPLSKNLKEEKP	0	0	0	0	0	0	0	0
D3YXJ0	677	D3YXJ0	D3YXJ0	Diacylglycerol kinase	Dgkh	sp|D3YXJ0|DGKH_MOUSE Diacylglycerol kinase eta OS=Mus musculus OX=10090 GN=Dgkh PE=1 SV=2	0.786723	9.44737	1.3e-08	68.763	55.575	49.464	0.786723	9.44737	1.3e-08	68.763						1	S	EDDAKESLSAKTTSQSPDAQASCGHPQTDSV	875.02	1327.9	1006.3	587.7	992.58	1046.9	603.59	971.36
D3YXJ0	1067	D3YXJ0	D3YXJ0	Diacylglycerol kinase	Dgkh	sp|D3YXJ0|DGKH_MOUSE Diacylglycerol kinase eta OS=Mus musculus OX=10090 GN=Dgkh PE=1 SV=2	1	52.344	4.28e-09	110.98	82.009	52.344	1	52.344	4.28e-09	110.98	1	42.5683	0.0129313	42.568		1	S	ETEALLVGRVPLHLESPHEERVSSALHSVEM	1665.3	2289.4	1484.6	2314.5	2013.1	2506.2	1618.1	2265.2
D3YXK2;Q80YR5	366;387	D3YXK2	D3YXK2	Scaffold attachment factor B1;Scaffold attachment factor B2	Safb;Safb2	sp|D3YXK2|SAFB1_MOUSE Scaffold attachment factor B1 OS=Mus musculus OX=10090 GN=Safb PE=1 SV=2;sp|Q80YR5|SAFB2_MOUSE Scaffold attachment factor B2 OS=Mus musculus OX=10090 GN=Safb2 PE=1 SV=2	0.999964	45.2241	9.59e-41	190.39	158.96	116.21	0.999951	44.56	1.13e-32	174.48	0.999964	45.2241	9.59e-41	190.39		1	S	EATSQELVRAPTAALSPEPQDSKEDVKKFAF	28633	42850	42049	24642	27694	29292	21153	31398
D3YXK2	623	D3YXK2	D3YXK2	Scaffold attachment factor B1	Safb	sp|D3YXK2|SAFB1_MOUSE Scaffold attachment factor B1 OS=Mus musculus OX=10090 GN=Safb PE=1 SV=2	0.986615	18.6752	0.00115473	103.55	60.948	72.643					0.986615	18.6752	0.00115473	103.55		1	S	ASKSQDRKSASREKRSVVSFDKVKESRKSRD	0	0	0	0	0	0	0	0
D3YXK2	626	D3YXK2	D3YXK2	Scaffold attachment factor B1	Safb	sp|D3YXK2|SAFB1_MOUSE Scaffold attachment factor B1 OS=Mus musculus OX=10090 GN=Safb PE=1 SV=2	0.99999	50.0189	0.000333836	117.89	63.922	101.3	0.604315	1.83914	0.000333836	117.89	0.99999	50.0189	0.00302925	101.3		1	S	SQDRKSASREKRSVVSFDKVKESRKSRDSES	4735.3	10096	319.48	6647.1	4360.1	6454	3805.1	6548.4
D3YYY8	390	D3YYY8	D3YYY8		Arhgef26	tr|D3YYY8|D3YYY8_MOUSE Rho guanine nucleotide exchange factor (GEF) 26 OS=Mus musculus OX=10090 GN=Arhgef26 PE=1 SV=1	1	136.988	9.59e-15	136.99	91.731	136.99	1	136.988	9.59e-15	136.99						1	S	AVLYQNYKEKALDIDSDEEPEAKEQKAEERI	1129.5	1516	651.67	1438.1	1126.9	1230.3	1024.7	942.41
D3YYY8	120	D3YYY8	D3YYY8		Arhgef26	tr|D3YYY8|D3YYY8_MOUSE Rho guanine nucleotide exchange factor (GEF) 26 OS=Mus musculus OX=10090 GN=Arhgef26 PE=1 SV=1	0.499963	0	0.000385336	89.013	68.906	89.013	0.499963	0	0.000385336	89.013						1	S	PRLRRPKSPLVSYAASGGSPKSTSNGTVASP	314.62	510.97	127.39	369.51	175.7	489.46	131.77	463.92
D3YYY8	123	D3YYY8	D3YYY8		Arhgef26	tr|D3YYY8|D3YYY8_MOUSE Rho guanine nucleotide exchange factor (GEF) 26 OS=Mus musculus OX=10090 GN=Arhgef26 PE=1 SV=1	0.499963	0	0.000385336	89.013	68.906	89.013	0.499963	0	0.000385336	89.013						1	S	RRPKSPLVSYAASGGSPKSTSNGTVASPAAL	314.62	510.97	127.39	369.51	175.7	489.46	131.77	463.92
D3YYY8	420	D3YYY8	D3YYY8		Arhgef26	tr|D3YYY8|D3YYY8_MOUSE Rho guanine nucleotide exchange factor (GEF) 26 OS=Mus musculus OX=10090 GN=Arhgef26 PE=1 SV=1	0.999829	39.2349	1.76e-05	97.911	60.486	97.911					0.999829	39.2349	1.76e-05	97.911		1	S	IVIHHKPLRSTWSQLSAVKRNGLSQTVSQEE	0	0	0	0	0	0	0	0
D3YZI9	519	D3YZI9	D3YZI9		Pgbd5	sp|D3YZI9|PGBD5_MOUSE PiggyBac transposable element-derived protein 5 OS=Mus musculus OX=10090 GN=Pgbd5 PE=1 SV=1	0.5	0	8.19e-06	100.15	82.167	72.547	0.5	0	8.19e-06	100.15	0.5	0	0.00076046	80.067		1	S	QFGERLVRELLGLEDSSPAH___________	836.39	1056.9	996.81	743.11	1098.3	675.65	889.07	798.85
D3YZI9	520	D3YZI9	D3YZI9		Pgbd5	sp|D3YZI9|PGBD5_MOUSE PiggyBac transposable element-derived protein 5 OS=Mus musculus OX=10090 GN=Pgbd5 PE=1 SV=1	0.99564	23.5857	2.87e-26	180.07	166.07	180.07	0.993934	22.1442	5.45e-19	164.97	0.99564	23.5857	2.87e-26	180.07		1	S	FGERLVRELLGLEDSSPAH____________	6292.4	6801	7445.3	5635.3	5645.4	4861.8	5416.5	5469
D3YZP9	233	D3YZP9	D3YZP9	Coiled-coil domain-containing protein 6	Ccdc6	sp|D3YZP9|CCDC6_MOUSE Coiled-coil domain-containing protein 6 OS=Mus musculus OX=10090 GN=Ccdc6 PE=1 SV=1	1	68.1676	0.00473011	68.168	52.902	68.168	1	68.1676	0.00473011	68.168	0.982254	17.4313	0.012284	48.659		1;2	S	EAEKRILQEKLDQPVSAPPSPRDISMEIDSP	642.84	574.5	179.7	485.75	253.26	362.13	275.67	529.17
D3YZP9	237	D3YZP9	D3YZP9	Coiled-coil domain-containing protein 6	Ccdc6	sp|D3YZP9|CCDC6_MOUSE Coiled-coil domain-containing protein 6 OS=Mus musculus OX=10090 GN=Ccdc6 PE=1 SV=1	1	68.1676	7.73e-34	183	145.81	68.168	1	68.1676	1.21e-09	124.3	0.999999	58.767	7.73e-34	183		1;2	S	RILQEKLDQPVSAPPSPRDISMEIDSPENMM	2705.7	2969.2	1270.3	2341.5	1561.5	2251.7	1841.6	1768.9
D3YZP9	316	D3YZP9	D3YZP9	Coiled-coil domain-containing protein 6	Ccdc6	sp|D3YZP9|CCDC6_MOUSE Coiled-coil domain-containing protein 6 OS=Mus musculus OX=10090 GN=Ccdc6 PE=1 SV=1	0.481068	4.21563	0.0161899	40.237	24.971	40.237	0.481068	4.21563	0.0161899	40.237							S	LQREMERREALCRQLSESESSLEMDDERYFN	0	0	0	0	0	0	0	0
D3YZU1	540	D3YZU1	D3YZU1	SH3 and multiple ankyrin repeat domains protein 1	Shank1	sp|D3YZU1|SHAN1_MOUSE SH3 and multiple ankyrin repeat domains protein 1 OS=Mus musculus OX=10090 GN=Shank1 PE=1 SV=1	0.989427	20.6668	1.72e-05	82.482	73.528	82.482	0.989427	20.6668	1.72e-05	82.482						1	S	DGPAGGTGGSGGPGGSLGSRGRRRKLYSAVP	584.03	1184.3	344.4	889.72	513.31	704.32	409.59	706
D3YZU1	413	D3YZU1	D3YZU1	SH3 and multiple ankyrin repeat domains protein 1	Shank1	sp|D3YZU1|SHAN1_MOUSE SH3 and multiple ankyrin repeat domains protein 1 OS=Mus musculus OX=10090 GN=Shank1 PE=1 SV=1	1	46.7462	1.15e-44	202.4	162.77	46.746	1	46.7462	1.47e-18	157.68	1	89.0494	1.15e-44	202.4		1	S	LIRNHREQDVVPFQESPKYAARRRGPPGAGL	18388	30594	16474	20124	18973	28159	21054	20162
D3YZU1	973	D3YZU1	D3YZU1	SH3 and multiple ankyrin repeat domains protein 1	Shank1	sp|D3YZU1|SHAN1_MOUSE SH3 and multiple ankyrin repeat domains protein 1 OS=Mus musculus OX=10090 GN=Shank1 PE=1 SV=1	0.233589	0	0.000267404	44.931	29.167	44.931	0.233589	0	0.000267404	44.931							S	RGGPFNPGSGGPLPASSPSSFDGPSPPDPRS	0	0	0	0	0	0	0	0
D3YZU1	974	D3YZU1	D3YZU1	SH3 and multiple ankyrin repeat domains protein 1	Shank1	sp|D3YZU1|SHAN1_MOUSE SH3 and multiple ankyrin repeat domains protein 1 OS=Mus musculus OX=10090 GN=Shank1 PE=1 SV=1	0.233589	0	0.000267404	44.931	29.167	44.931	0.233589	0	0.000267404	44.931							S	GGPFNPGSGGPLPASSPSSFDGPSPPDPRSG	0	0	0	0	0	0	0	0
D3YZU1	976	D3YZU1	D3YZU1	SH3 and multiple ankyrin repeat domains protein 1	Shank1	sp|D3YZU1|SHAN1_MOUSE SH3 and multiple ankyrin repeat domains protein 1 OS=Mus musculus OX=10090 GN=Shank1 PE=1 SV=1	0.233589	0	0.000267404	44.931	29.167	44.931	0.233589	0	0.000267404	44.931							S	PFNPGSGGPLPASSPSSFDGPSPPDPRSGGR	0	0	0	0	0	0	0	0
D3YZU1	977	D3YZU1	D3YZU1	SH3 and multiple ankyrin repeat domains protein 1	Shank1	sp|D3YZU1|SHAN1_MOUSE SH3 and multiple ankyrin repeat domains protein 1 OS=Mus musculus OX=10090 GN=Shank1 PE=1 SV=1	0.233589	0	0.000267404	44.931	29.167	44.931	0.233589	0	0.000267404	44.931							S	FNPGSGGPLPASSPSSFDGPSPPDPRSGGRE	0	0	0	0	0	0	0	0
D3YZU1	1907	D3YZU1	D3YZU1	SH3 and multiple ankyrin repeat domains protein 1	Shank1	sp|D3YZU1|SHAN1_MOUSE SH3 and multiple ankyrin repeat domains protein 1 OS=Mus musculus OX=10090 GN=Shank1 PE=1 SV=1	0.739946	7.24366	6.83e-09	106.35	91.199	106.35	0.739946	7.24366	6.83e-09	106.35						1	S	TAGGALPWARGGSGGSTDSHHGGASYIPERT	1442.8	1182	1014.9	1086.1	894.84	766.81	686.94	889.05
D3YZU1	1137	D3YZU1	D3YZU1	SH3 and multiple ankyrin repeat domains protein 1	Shank1	sp|D3YZU1|SHAN1_MOUSE SH3 and multiple ankyrin repeat domains protein 1 OS=Mus musculus OX=10090 GN=Shank1 PE=1 SV=1	0.487826	0	0.00248934	51.546	28.826	49.482					0.487826	0	0.00248934	51.546			S	TKVEGEPQKGSLPPASSPTSPALPRSEPPPA	0	0	0	0	0	0	0	0
D3YZU1	1138	D3YZU1	D3YZU1	SH3 and multiple ankyrin repeat domains protein 1	Shank1	sp|D3YZU1|SHAN1_MOUSE SH3 and multiple ankyrin repeat domains protein 1 OS=Mus musculus OX=10090 GN=Shank1 PE=1 SV=1	0.487826	0	0.00248934	51.546	28.826	49.482					0.487826	0	0.00248934	51.546			S	KVEGEPQKGSLPPASSPTSPALPRSEPPPAG	0	0	0	0	0	0	0	0
D3YZU1	1517	D3YZU1	D3YZU1	SH3 and multiple ankyrin repeat domains protein 1	Shank1	sp|D3YZU1|SHAN1_MOUSE SH3 and multiple ankyrin repeat domains protein 1 OS=Mus musculus OX=10090 GN=Shank1 PE=1 SV=1	0.917163	10.4567	1.54e-66	209.6	188.65	209.6	0.917163	10.4567	1.54e-66	209.6	0.793821	6.53245	3.29e-05	107.74		1	S	ENCQARPPPAGTRGSSTEDGPGVPPPSPRRV	5645.6	7242.9	4862	5227.7	4672.5	4781.4	4253	6158.6
D3YZU1	1931	D3YZU1	D3YZU1	SH3 and multiple ankyrin repeat domains protein 1	Shank1	sp|D3YZU1|SHAN1_MOUSE SH3 and multiple ankyrin repeat domains protein 1 OS=Mus musculus OX=10090 GN=Shank1 PE=1 SV=1	0.999427	35.0658	1.82e-191	290.32	235.28	84.566	0.999427	35.0658	2.54e-05	103.85	0.9978	26.5691	1.82e-191	290.32		1	S	SYIPERTSSLQRQRLSEDSQTSLLSKPSSSI	8907.3	7657.7	2550.3	8138.6	5211.6	6493.3	4863.5	6634.8
D3YZU1	1291	D3YZU1	D3YZU1	SH3 and multiple ankyrin repeat domains protein 1	Shank1	sp|D3YZU1|SHAN1_MOUSE SH3 and multiple ankyrin repeat domains protein 1 OS=Mus musculus OX=10090 GN=Shank1 PE=1 SV=1	0.999981	47.3059	0.000436394	74.987	51.996	74.987	0.999981	47.3059	0.000436394	74.987	0.999629	34.3102	0.000858608	67.997		1	S	LGPGAPPGPRLRHSKSIDEGMFSAEPYLRLE	902.51	4446.3	204.69	3827.8	1106.1	4355.8	1703.2	2489.3
D3YZU1	898	D3YZU1	D3YZU1	SH3 and multiple ankyrin repeat domains protein 1	Shank1	sp|D3YZU1|SHAN1_MOUSE SH3 and multiple ankyrin repeat domains protein 1 OS=Mus musculus OX=10090 GN=Shank1 PE=1 SV=1	1	86.3775	6.07e-06	100.9	85.665	86.378	1	86.3775	2.14e-05	86.378	1	84.4988	6.07e-06	100.9		1	S	PSFLPPGPGLMLRQKSIGAAEDDRPYLAPPA	2676.8	11443	218.43	10418	1991.1	10592	3382.8	4856.7
D3YZU1	1263	D3YZU1	D3YZU1	SH3 and multiple ankyrin repeat domains protein 1	Shank1	sp|D3YZU1|SHAN1_MOUSE SH3 and multiple ankyrin repeat domains protein 1 OS=Mus musculus OX=10090 GN=Shank1 PE=1 SV=1	0.78965	6.04727	8.48e-06	57.919	50.473	57.919	0.78965	6.04727	8.48e-06	57.919						1	S	GGWQNEARRRSTLFLSTDAGDEDGGDSGLGP	91.282	293.34	193.66	309.51	0	0	0	151.09
D3Z0P8	34	D3Z0P8	D3Z0P8		Tmem200b	tr|D3Z0P8|D3Z0P8_MOUSE Transmembrane protein 200B OS=Mus musculus OX=10090 GN=Tmem200b PE=1 SV=1	1	61.9993	0.014985	61.999	31.281	61.999	1	61.9993	0.014985	61.999						1	S	VSRLGRRLGRRRRPRSPPEPLRVRARLRLRS	82.213	736.15	346.87	259.1	105.55	272.72	239.95	189.87
D3Z7H4	274	D3Z7H4	D3Z7H4	Germ cell-specific gene 1-like protein	Gsg1l	sp|D3Z7H4|GSG1L_MOUSE Germ cell-specific gene 1-like protein OS=Mus musculus OX=10090 GN=Gsg1l PE=1 SV=2	1	113.224	6.29e-06	113.22	87.839	113.22	1	113.224	6.29e-06	113.22						1	S	EAIKYFRERIEKGDVSEEEDFRLACRHERYP	1130.1	2049.5	484.35	1186	2188.5	1678	1795.1	1727.7
E1U8D0	1015	E1U8D0	E1U8D0	Protein SOGA1;N-terminal form;C-terminal 80 kDa form	Soga1	sp|E1U8D0|SOGA1_MOUSE Protein SOGA1 OS=Mus musculus OX=10090 GN=Soga1 PE=1 SV=3	1	47.1977	0.000342177	93.649	59.443	47.198	1	47.1977	0.0259366	47.198	1	93.6488	0.000342177	93.649		1	S	RSYTAPDKTGIRVYYSPPVARRLGVPVVHDK	665.28	406.97	256.42	428.56	274.22	547.5	255.43	295.81
E9PUD6	689	E9PUD6	E9PUD6		Zscan18	tr|E9PUD6|E9PUD6_MOUSE Zinc finger and SCAN domain containing 18 OS=Mus musculus OX=10090 GN=Zscan18 PE=1 SV=1	0.999426	33.5555	1.31e-120	222.45	205.01	133.48	0.999426	33.5555	9.56e-12	133.48	0.980731	17.1493	1.31e-120	222.45		1	S	PQKALDAEGEDSSPASPQRQSVIQQSAQDKD	986.12	798.97	637.35	551.46	800.99	346.05	863.77	869.3
E9PUD6	13	E9PUD6	E9PUD6		Zscan18	tr|E9PUD6|E9PUD6_MOUSE Zinc finger and SCAN domain containing 18 OS=Mus musculus OX=10090 GN=Zscan18 PE=1 SV=1	0.579	1.38397	0.000149349	93.345	35.756	93.345					0.579	1.38397	0.000149349	93.345		1	S	___MLPLERVLASPRSSPPQPEPSTLRSKDT	0	0	0	0	0	0	0	0
E9PUD6	14	E9PUD6	E9PUD6		Zscan18	tr|E9PUD6|E9PUD6_MOUSE Zinc finger and SCAN domain containing 18 OS=Mus musculus OX=10090 GN=Zscan18 PE=1 SV=1	0.909347	9.70299	0.000535372	70.488	13.925	66.845	0.865363	8.08089	0.00171692	70.488	0.909347	9.70299	0.000535372	66.845		1;2	S	__MLPLERVLASPRSSPPQPEPSTLRSKDTV	260.76	650.39	429.16	302.3	729.16	235.49	646.93	637.44
E9PUD6	10	E9PUD6	E9PUD6		Zscan18	tr|E9PUD6|E9PUD6_MOUSE Zinc finger and SCAN domain containing 18 OS=Mus musculus OX=10090 GN=Zscan18 PE=1 SV=1	0.994335	22.9218	0.000535372	66.845	53.865	58.914					0.994335	22.9218	0.000535372	66.845		2	S	______MLPLERVLASPRSSPPQPEPSTLRS	0	0	0	0	0	0	0	0
E9PUL5	98	E9PUL5	E9PUL5	Proline-rich transmembrane protein 2	Prrt2	sp|E9PUL5|PRRT2_MOUSE Proline-rich transmembrane protein 2 OS=Mus musculus OX=10090 GN=Prrt2 PE=1 SV=1	0.999978	46.6361	1.69e-69	221.44	141.54	187.42	0.997972	26.9199	1.69e-69	221.44	0.999978	46.6361	2.73e-33	187.42		1;2	S	QATDLSLNPEEGSKASPSPSPSEARQEPASK	10155	22194	595.65	8805.9	12513	11027	10821	18504
E9PUL5	100	E9PUL5	E9PUL5	Proline-rich transmembrane protein 2	Prrt2	sp|E9PUL5|PRRT2_MOUSE Proline-rich transmembrane protein 2 OS=Mus musculus OX=10090 GN=Prrt2 PE=1 SV=1	0.613012	2.14884	0.000115057	95.618	53.019	48.741					0.613012	2.14884	0.000115057	95.618		1	S	TDLSLNPEEGSKASPSPSPSEARQEPASKPD	0	0	0	0	0	0	0	0
E9PUL5	102	E9PUL5	E9PUL5	Proline-rich transmembrane protein 2	Prrt2	sp|E9PUL5|PRRT2_MOUSE Proline-rich transmembrane protein 2 OS=Mus musculus OX=10090 GN=Prrt2 PE=1 SV=1	0.90805	10.4373	0.000378152	69.979	46.551	69.979	0.90805	10.4373	0.000631307	69.979	0.701282	6.09542	0.000378152	53.475		1;2	S	LSLNPEEGSKASPSPSPSEARQEPASKPDVN	221	607.79	0	208.17	274.07	257.5	143.39	291.48
E9PUL5	104	E9PUL5	E9PUL5	Proline-rich transmembrane protein 2	Prrt2	sp|E9PUL5|PRRT2_MOUSE Proline-rich transmembrane protein 2 OS=Mus musculus OX=10090 GN=Prrt2 PE=1 SV=1	0.704517	6.28768	2.92e-05	72.569	59.767	72.569	0.704517	6.28768	2.92e-05	72.569						2	S	LNPEEGSKASPSPSPSEARQEPASKPDVNRE	0	0	0	0	0	0	0	0
E9PUL5	254	E9PUL5	E9PUL5	Proline-rich transmembrane protein 2	Prrt2	sp|E9PUL5|PRRT2_MOUSE Proline-rich transmembrane protein 2 OS=Mus musculus OX=10090 GN=Prrt2 PE=1 SV=1	0.856762	7.76801	4.21e-22	146.25	133.7	146.25	0.822165	6.64942	2.03e-07	109.68	0.856762	7.76801	4.21e-22	146.25		1	S	GGHPGSPRGSLSRHPSSQLAGPGVEGGEGTQ	921.05	1597.8	176.55	1239.6	875.11	1370.7	1118.4	2004
E9PUL5	208	E9PUL5	E9PUL5	Proline-rich transmembrane protein 2	Prrt2	sp|E9PUL5|PRRT2_MOUSE Proline-rich transmembrane protein 2 OS=Mus musculus OX=10090 GN=Prrt2 PE=1 SV=1	0.9975	26.3381	2.32e-188	272.69	245.6	272.69	0.997365	26.758	7.28e-165	260.02	0.9975	26.3381	2.32e-188	272.69		1;2	S	LQAGDGEEGPAPQPHSPPSTKTPPANGAPPR	28463	58888	9145.9	24162	37669	37336	31071	44292
E9PUR0	1678	E9PUR0	E9PUR0		Ankhd1	tr|E9PUR0|E9PUR0_MOUSE Ankyrin repeat and KH domain containing 1 OS=Mus musculus OX=10090 GN=Ankhd1 PE=1 SV=1	0.847291	7.44167	0.0420242	50.04	8.5921	50.04					0.847291	7.44167	0.0420242	50.04		1	S	KSLPLSSPTMKLNLTSPKRGQKREEGWKEVV	0	0	0	0	0	0	0	0
E9PV26	519	E9PV26	E9PV26		Prr36	tr|E9PV26|E9PV26_MOUSE Proline rich 36 OS=Mus musculus OX=10090 GN=Prr36 PE=1 SV=1	0.991863	20.86	9.14e-09	122.39	107.68	122.39	0.808636	6.25893	9.57e-09	118.76	0.991863	20.86	9.14e-09	122.39		1	S	SQLPLSTPFRANFSESPPLPRATLANRTTPS	2353.7	1943.9	1662.5	1889.6	2619.3	1650.6	1294.2	2190.7
E9PV26	288	E9PV26	E9PV26		Prr36	tr|E9PV26|E9PV26_MOUSE Proline rich 36 OS=Mus musculus OX=10090 GN=Prr36 PE=1 SV=1	0.829103	7.57717	0.000953701	62.891	29.662	62.891					0.829103	7.57717	0.000953701	62.891		1	S	KPVSRSLIPSATPQLSPSRSGVSPRVTPRAP	0	0	0	0	0	0	0	0
E9PV26	197	E9PV26	E9PV26		Prr36	tr|E9PV26|E9PV26_MOUSE Proline rich 36 OS=Mus musculus OX=10090 GN=Prr36 PE=1 SV=1	0.970519	15.2016	3.5e-05	78.661	62.539	78.661					0.970519	15.2016	3.5e-05	78.661		1	S	TPKRNTLNSGTRRVLSADSLGPTSGAPSPAI	0	0	0	0	0	0	0	0
E9PV86	407	E9PV86	E9PV86		Mctp1	sp|E9PV86|MCTP1_MOUSE Multiple C2 and transmembrane domain-containing protein 1 OS=Mus musculus OX=10090 GN=Mctp1 PE=1 SV=1	0.998746	29.0117	0.00768251	74.173	38.735	74.173	0.998746	29.0117	0.00768251	74.173						1	S	LMRKSWKRSSKFQTQSLRLSDQHRKSHLWRG	1487.6	2390.8	660.49	1548.4	932.79	1617.8	644.28	1968
E9PVZ8	548	E9PVZ8	E9PVZ8		Golgb1	tr|E9PVZ8|E9PVZ8_MOUSE Golgi autoantigen
E9PVZ8	549	E9PVZ8	E9PVZ8		Golgb1	tr|E9PVZ8|E9PVZ8_MOUSE Golgi autoantigen
E9PW37	1040	E9PW37	E9PW37		Rasal2	tr|E9PW37|E9PW37_MOUSE RAS protein activator like 2 OS=Mus musculus OX=10090 GN=Rasal2 PE=1 SV=1	0.773058	5.57016	0.00829059	49.423	33.533	46.797	0.773058	5.57016	0.00829059	49.423						1	S	LGARAKAPPSLPHSASLRSTGSMSVASAALM	318.69	1449.1	921.67	872.26	472.46	1453.3	612.2	537.69
E9PW37	158	E9PW37	E9PW37		Rasal2	tr|E9PW37|E9PW37_MOUSE RAS protein activator like 2 OS=Mus musculus OX=10090 GN=Rasal2 PE=1 SV=1	1	55.4522	2.27e-05	107.97	84.116	55.452	1	55.4522	0.0320585	55.452	1	64.1212	2.27e-05	107.97		1	S	YPQEGTTKLEVPAERSPRRRSISGTSTSEKP	866.84	1367.7	404.5	1106.3	586.7	991.11	406.24	724.97
E9PW37	976	E9PW37	E9PW37		Rasal2	tr|E9PW37|E9PW37_MOUSE RAS protein activator like 2 OS=Mus musculus OX=10090 GN=Rasal2 PE=1 SV=1	0.572253	1.45305	0.00775098	48.741	35.604	48.741	0.572253	1.45305	0.00775098	48.741						1	S	SQSNSEDFKLSGPSNSSMEDFTKRSSHSEDF	1774.9	1434	287.19	1390.7	1408.6	1679.7	1253.1	1494.8
E9PW37	1093	E9PW37	E9PW37		Rasal2	tr|E9PW37|E9PW37_MOUSE RAS protein activator like 2 OS=Mus musculus OX=10090 GN=Rasal2 PE=1 SV=1	0.70946	8.68742	0.000869899	50.897	27.979	50.897	0.70946	8.68742	0.000869899	50.897						1;2	S	PKVRAIQRQQTQQVQSPVDSATMSPVERTAA	474.62	574.43	486.61	224.3	449.86	364.14	389.22	326.41
E9PW37	1097	E9PW37	E9PW37		Rasal2	tr|E9PW37|E9PW37_MOUSE RAS protein activator like 2 OS=Mus musculus OX=10090 GN=Rasal2 PE=1 SV=1	0.655599	4.91481	5.73e-07	88.087	66.786	86.211	0.655599	4.91481	5.73e-07	86.211	0.331766	0	8.98e-07	88.087		1;2	S	AIQRQQTQQVQSPVDSATMSPVERTAAWVLN	908.66	1046.6	805.27	792.97	459.84	877.16	628.22	638.45
E9PW37	1101	E9PW37	E9PW37		Rasal2	tr|E9PW37|E9PW37_MOUSE RAS protein activator like 2 OS=Mus musculus OX=10090 GN=Rasal2 PE=1 SV=1	0.999343	31.8524	9.96e-94	219.95	193.81	219.95	0.999343	31.8524	9.96e-94	219.95	0.559883	3.09072	8.98e-07	88.087		1;2	S	QQTQQVQSPVDSATMSPVERTAAWVLNNGQY	2595.8	3152.1	2423.6	2161.8	2276.9	2046.8	2049	2235.9
E9PW37	133	E9PW37	E9PW37		Rasal2	tr|E9PW37|E9PW37_MOUSE RAS protein activator like 2 OS=Mus musculus OX=10090 GN=Rasal2 PE=1 SV=1	0.727424	7.27484	1.28e-05	80.786	69.792	55.589	0.727424	7.27484	2.02e-05	77.689	0.605852	1.94858	1.28e-05	80.786		1	S	QQTDSTKGRCLRRTVSVPSEGQFPEYPQEGT	1257.5	1665.5	427.93	1608.6	1260.2	1708.9	838.76	1169.6
E9PW37	136	E9PW37	E9PW37		Rasal2	tr|E9PW37|E9PW37_MOUSE RAS protein activator like 2 OS=Mus musculus OX=10090 GN=Rasal2 PE=1 SV=1	0.877013	9.12103	2.12e-08	103.13	91.155	103.13					0.877013	9.12103	2.12e-08	103.13		1	S	DSTKGRCLRRTVSVPSEGQFPEYPQEGTTKL	0	0	0	0	0	0	0	0
E9PW37	762	E9PW37	E9PW37		Rasal2	tr|E9PW37|E9PW37_MOUSE RAS protein activator like 2 OS=Mus musculus OX=10090 GN=Rasal2 PE=1 SV=1	0.759127	5.3031	2.24e-11	126.34	79.882	126.34	0.759127	5.3031	2.24e-11	126.34						1	S	AKLGPLPRVLADITKSLTNPTPIQQQLRRFA	1024.4	2297.6	837	1354.2	972.74	1660.9	686.42	856.26
E9PW37	810	E9PW37	E9PW37		Rasal2	tr|E9PW37|E9PW37_MOUSE RAS protein activator like 2 OS=Mus musculus OX=10090 GN=Rasal2 PE=1 SV=1	0.835017	7.04564	3.4e-44	197.38	172.55	197.38					0.835017	7.04564	3.4e-44	197.38		1	S	RICEDPTDSDLHKLKSPSQDNTDSYFRGKTL	0	0	0	0	0	0	0	0
E9PW37	812	E9PW37	E9PW37		Rasal2	tr|E9PW37|E9PW37_MOUSE RAS protein activator like 2 OS=Mus musculus OX=10090 GN=Rasal2 PE=1 SV=1	0.994496	22.5741	5.68e-123	259.4	200.97	259.4	0.994496	22.5741	5.68e-123	259.4						1	S	CEDPTDSDLHKLKSPSQDNTDSYFRGKTLLL	11467	10718	2364.5	10900	8677.7	10169	7610.8	10551
E9PW83	669	E9PW83	E9PW83		Fam184a	tr|E9PW83|E9PW83_MOUSE Family with sequence similarity 184
E9PW83	672	E9PW83	E9PW83		Fam184a	tr|E9PW83|E9PW83_MOUSE Family with sequence similarity 184
E9PWW9	668	E9PWW9	E9PWW9		Rsf1	tr|E9PWW9|E9PWW9_MOUSE Remodeling and spacing factor 1 OS=Mus musculus OX=10090 GN=Rsf1 PE=1 SV=2	0.99346	22.3158	0.000412982	67.646	51.422	67.646	0.99346	22.3158	0.000412982	67.646						1	S	DCSRGSSESQSLENASPEILKEDSESSREEV	651.77	848.66	175.55	803.99	870.76	623.93	809.26	977.56
E9PWW9	232	E9PWW9	E9PWW9		Rsf1	tr|E9PWW9|E9PWW9_MOUSE Remodeling and spacing factor 1 OS=Mus musculus OX=10090 GN=Rsf1 PE=1 SV=2	0.936936	16.496	2.6e-09	107.83	89.537	91.722	0.92535	13.8686	2.6e-09	107.83	0.936936	16.496	1.56e-07	91.722		1	S	VLLKNSSQQEDSSRESPTLEDEETKKDEETP	1959.4	2371	186.95	2843.8	1782.4	3034.2	2140.8	3004.9
E9PX29	1582	E9PX29	E9PX29		Sptbn4	tr|E9PX29|E9PX29_MOUSE Spectrin beta chain OS=Mus musculus OX=10090 GN=Sptbn4 PE=1 SV=1	0.981725	17.3013	0.00022204	80.638	60.8	80.638					0.981725	17.3013	0.00022204	80.638		1	S	LEEVLERAGVLASLRSPEAEAVRRGQEQLQS	0	0	0	0	0	0	0	0
E9PX29	1748	E9PX29	E9PX29		Sptbn4	tr|E9PX29|E9PX29_MOUSE Spectrin beta chain OS=Mus musculus OX=10090 GN=Sptbn4 PE=1 SV=1	0.988897	19.4973	0.00104982	43.099	30.608	43.099					0.988897	19.4973	0.00104982	43.099		1	S	DELEHWIAEKEVVAGSPELGQDFEHVSVLQE	0	0	0	0	0	0	0	0
E9PX29	2301	E9PX29	E9PX29		Sptbn4	tr|E9PX29|E9PX29_MOUSE Spectrin beta chain OS=Mus musculus OX=10090 GN=Sptbn4 PE=1 SV=1	0.983581	17.8534	6.72e-56	198.24	173.04	152.95	0.97988	16.8756	1.25e-07	116.24	0.983581	17.8534	6.72e-56	198.24		1	S	ERRRERRERRIERQESSEQETPTRGELVKGK	6464.9	10156	7360.5	8782.3	2992.2	7941.5	2885	5522.5
E9PX29	2302	E9PX29	E9PX29		Sptbn4	tr|E9PX29|E9PX29_MOUSE Spectrin beta chain OS=Mus musculus OX=10090 GN=Sptbn4 PE=1 SV=1	0.654404	2.77853	6.72e-56	198.24	173.04	162.59					0.654404	2.77853	6.72e-56	198.24		1	S	RRRERRERRIERQESSEQETPTRGELVKGKA	0	0	0	0	0	0	0	0
E9PX29	2268	E9PX29	E9PX29		Sptbn4	tr|E9PX29|E9PX29_MOUSE Spectrin beta chain OS=Mus musculus OX=10090 GN=Sptbn4 PE=1 SV=1	1	119.017	4.76e-57	204.51	185.68	204.51	1	119.017	4.76e-57	204.51	1	63.7426	1.76e-06	111.31		1	S	QPEETARRRRPERQESADHEGPHSLTLGRYE	4140.5	6771.1	3985.2	3709.3	3045.8	4760.9	2235.3	3864.7
E9PX29	2250	E9PX29	E9PX29		Sptbn4	tr|E9PX29|E9PX29_MOUSE Spectrin beta chain OS=Mus musculus OX=10090 GN=Sptbn4 PE=1 SV=1	1	63.1295	1.1e-09	125.22	96.261	125.22	1	63.1295	1.1e-09	125.22						1	S	RAEELPRRRRSERQESVDQPEETARRRRPER	1108.5	3570.6	616.7	1631.3	1463.1	2084.6	729.89	1393
E9PX29	2161	E9PX29	E9PX29		Sptbn4	tr|E9PX29|E9PX29_MOUSE Spectrin beta chain OS=Mus musculus OX=10090 GN=Sptbn4 PE=1 SV=1	0.999061	30.8749	0.00342652	75.78	42.834	58.21	0.999061	30.8749	0.00342652	75.78						1	S	PGGYDRGLEPLARRASDTLSAEVRTRVGYVR	687.5	1258.9	772.43	715.7	1361.1	1064	1042.1	1059
E9PX29	2540	E9PX29	E9PX29		Sptbn4	tr|E9PX29|E9PX29_MOUSE Spectrin beta chain OS=Mus musculus OX=10090 GN=Sptbn4 PE=1 SV=1	0.238896	0	0.00915183	42.813	35.611	42.813	0.238896	0	0.00915183	42.813							S	EHAEIARWGQTLPTTSSTDEGNPKREGGERR	0	0	0	0	0	0	0	0
E9PX29	2541	E9PX29	E9PX29		Sptbn4	tr|E9PX29|E9PX29_MOUSE Spectrin beta chain OS=Mus musculus OX=10090 GN=Sptbn4 PE=1 SV=1	0.556059	6.09797	0.000276013	76.358	57.612	76.358	0.238896	0	0.00915183	42.813	0.556059	6.09797	0.000276013	76.358		1	S	HAEIARWGQTLPTTSSTDEGNPKREGGERRA	0	0	0	0	0	0	0	0
E9PXF0	1032	E9PXF0	E9PXF0		Pcdh17	tr|E9PXF0|E9PXF0_MOUSE Protocadherin 17 OS=Mus musculus OX=10090 GN=Pcdh17 PE=1 SV=1	0.242656	0	0.000273231	65.395	47.959	65.395					0.242656	0	0.000273231	65.395			S	LKAKRALSPLLQEVPSASSSPTKACIEPCAS	0	0	0	0	0	0	0	0
E9PXF0	1034	E9PXF0	E9PXF0		Pcdh17	tr|E9PXF0|E9PXF0_MOUSE Protocadherin 17 OS=Mus musculus OX=10090 GN=Pcdh17 PE=1 SV=1	0.242656	0	0.000273231	65.395	47.959	65.395					0.242656	0	0.000273231	65.395			S	AKRALSPLLQEVPSASSSPTKACIEPCASTK	0	0	0	0	0	0	0	0
E9PXF0	1035	E9PXF0	E9PXF0		Pcdh17	tr|E9PXF0|E9PXF0_MOUSE Protocadherin 17 OS=Mus musculus OX=10090 GN=Pcdh17 PE=1 SV=1	0.242656	0	0.000273231	65.395	47.959	65.395					0.242656	0	0.000273231	65.395			S	KRALSPLLQEVPSASSSPTKACIEPCASTKG	0	0	0	0	0	0	0	0
E9PXF0	1036	E9PXF0	E9PXF0		Pcdh17	tr|E9PXF0|E9PXF0_MOUSE Protocadherin 17 OS=Mus musculus OX=10090 GN=Pcdh17 PE=1 SV=1	0.465122	5.28458	0.000273231	65.395	47.959	41.257					0.465122	5.28458	0.000273231	65.395			S	RALSPLLQEVPSASSSPTKACIEPCASTKGS	0	0	0	0	0	0	0	0
E9PXF0	805	E9PXF0	E9PXF0		Pcdh17	tr|E9PXF0|E9PXF0_MOUSE Protocadherin 17 OS=Mus musculus OX=10090 GN=Pcdh17 PE=1 SV=1	0.5	0	0.0633831	43.246	27.044	43.246	0.5	0	0.0633831	43.246						1	S	ATSPMYFDYQTRLPLSSPRSEVMYLKPASNN	0	128.27	0	0	113.44	113.49	78.803	0
E9PXF0	806	E9PXF0	E9PXF0		Pcdh17	tr|E9PXF0|E9PXF0_MOUSE Protocadherin 17 OS=Mus musculus OX=10090 GN=Pcdh17 PE=1 SV=1	0.655342	2.79079	0.00844988	72.789	34.629	72.789	0.5	0	0.0633831	43.246	0.655342	2.79079	0.00844988	72.789		1	S	TSPMYFDYQTRLPLSSPRSEVMYLKPASNNL	0	128.27	0	0	113.44	113.49	78.803	0
E9PXF0	1078	E9PXF0	E9PXF0		Pcdh17	tr|E9PXF0|E9PXF0_MOUSE Protocadherin 17 OS=Mus musculus OX=10090 GN=Pcdh17 PE=1 SV=1	0.75729	6.91301	5.64e-05	54.658	38.716	54.658					0.75729	6.91301	5.64e-05	54.658		1	S	AEASSSYLPTDSQYPSPSKQPRDPSFMASDQ	0	0	0	0	0	0	0	0
E9PXF0	1109	E9PXF0	E9PXF0		Pcdh17	tr|E9PXF0|E9PXF0_MOUSE Protocadherin 17 OS=Mus musculus OX=10090 GN=Pcdh17 PE=1 SV=1	0.917997	10.4901	2.85e-31	167.98	143.69	167.98					0.917997	10.4901	2.85e-31	167.98		1	S	MARVFADVHSRARRASSEMGAVLEQLEQPNR	0	0	0	0	0	0	0	0
E9PXF0	1110	E9PXF0	E9PXF0		Pcdh17	tr|E9PXF0|E9PXF0_MOUSE Protocadherin 17 OS=Mus musculus OX=10090 GN=Pcdh17 PE=1 SV=1	0.580241	1.40609	1.25e-05	92.29	77.362	92.29	0.574872	1.31052	5.71e-05	75.358	0.580241	1.40609	1.25e-05	92.29		1	S	ARVFADVHSRARRASSEMGAVLEQLEQPNRD	0	0	0	0	0	0	0	0
E9PYD1;Q8CJ19	252;1216	E9PYD1;Q8CJ19	Q8CJ19	Protein-methionine sulfoxide oxidase MICAL3	Fam98c;Mical3	tr|E9PYD1|E9PYD1_MOUSE Family with sequence similarity 98
E9PYD1	128	E9PYD1	E9PYD1		Fam98c	tr|E9PYD1|E9PYD1_MOUSE Family with sequence similarity 98
E9PYD1	129	E9PYD1	E9PYD1		Fam98c	tr|E9PYD1|E9PYD1_MOUSE Family with sequence similarity 98
E9PYF4	1012	E9PYF4	E9PYF4		Lmo7	tr|E9PYF4|E9PYF4_MOUSE LIM domain only 7 OS=Mus musculus OX=10090 GN=Lmo7 PE=1 SV=1	0.293575	0.312039	2.41e-05	59.189	45.317	59.189	0.293575	0.312039	2.41e-05	59.189							S	SSKATFSSMSGLDSVSDSGEGRGSPLREVSR	0	0	0	0	0	0	0	0
E9PYF4	1014	E9PYF4	E9PYF4		Lmo7	tr|E9PYF4|E9PYF4_MOUSE LIM domain only 7 OS=Mus musculus OX=10090 GN=Lmo7 PE=1 SV=1	0.44472	0	4.44e-08	67.283	51.777	67.283	0.44472	0	4.44e-08	67.283	0.399212	0	0.000616206	43.579			S	KATFSSMSGLDSVSDSGEGRGSPLREVSRSL	0	0	0	0	0	0	0	0
E9PYF4	1020	E9PYF4	E9PYF4		Lmo7	tr|E9PYF4|E9PYF4_MOUSE LIM domain only 7 OS=Mus musculus OX=10090 GN=Lmo7 PE=1 SV=1	0.84616	10.811	4.44e-08	83.236	68.42	83.236	0.80923	7.38807	4.44e-08	74.274	0.84616	10.811	4.04e-07	83.236		1	S	MSGLDSVSDSGEGRGSPLREVSRSLDQFSDM	318.04	639.6	518.88	392.49	539.95	299.91	404.84	263.61
E9PYF4	813	E9PYF4	E9PYF4		Lmo7	tr|E9PYF4|E9PYF4_MOUSE LIM domain only 7 OS=Mus musculus OX=10090 GN=Lmo7 PE=1 SV=1	0.962486	14.0952	5.78e-06	93.73	83.096	93.73	0.962486	14.0952	5.78e-06	93.73						1	S	NREDSVVAETQLASHSPEEQRLAPSPSEEPR	834.43	1913.4	734.81	1262.8	1114.6	1493.7	1144.9	1273.3
E9PYF4	981	E9PYF4	E9PYF4		Lmo7	tr|E9PYF4|E9PYF4_MOUSE LIM domain only 7 OS=Mus musculus OX=10090 GN=Lmo7 PE=1 SV=1	0.424012	0	4.01e-07	76.237	67.074	76.237					0.424012	0	4.01e-07	76.237			S	ASEKEVIATEDVASLSSPTLPSSSLSHDRAV	0	0	0	0	0	0	0	0
E9PYF4	982	E9PYF4	E9PYF4		Lmo7	tr|E9PYF4|E9PYF4_MOUSE LIM domain only 7 OS=Mus musculus OX=10090 GN=Lmo7 PE=1 SV=1	0.820598	6.62991	7.4e-27	152.88	139.69	152.88	0.820598	6.62991	7.4e-27	152.88	0.424012	0	4.01e-07	76.237		1	S	SEKEVIATEDVASLSSPTLPSSSLSHDRAVS	333.75	258.02	291.77	226.57	365.79	210.09	182.99	252.07
E9PYF4	824	E9PYF4	E9PYF4		Lmo7	tr|E9PYF4|E9PYF4_MOUSE LIM domain only 7 OS=Mus musculus OX=10090 GN=Lmo7 PE=1 SV=1	0.596507	1.6978	0.0120262	52.79	27.353	52.79					0.596507	1.6978	0.0120262	52.79		1	S	LASHSPEEQRLAPSPSEEPRQASGSSAEPHQ	0	0	0	0	0	0	0	0
E9PYF4	1533	E9PYF4	E9PYF4		Lmo7	tr|E9PYF4|E9PYF4_MOUSE LIM domain only 7 OS=Mus musculus OX=10090 GN=Lmo7 PE=1 SV=1	0.997406	25.9866	0.000322156	62.663	29.356	54.637	0.997406	25.9866	0.000322156	62.663						1	S	NKEPICLPGIMRRGESLDNLDSQRPGSWRQS	2024.8	1302	1046.2	1330.5	1041.5	886.42	946.62	690.8
E9PYF4	1502	E9PYF4	E9PYF4		Lmo7	tr|E9PYF4|E9PYF4_MOUSE LIM domain only 7 OS=Mus musculus OX=10090 GN=Lmo7 PE=1 SV=1	0.499999	0	3.04e-05	96.673	75.422	96.673	0.499999	0	3.04e-05	96.673	0.499981	0	0.0110907	46.408		1	S	ELERQQILQEMRKRTSLHNDNSWIRQRSASV	1865.2	850.89	364.67	1234.4	749.84	804.94	351.3	544.5
E9PYF4	1444	E9PYF4	E9PYF4		Lmo7	tr|E9PYF4|E9PYF4_MOUSE LIM domain only 7 OS=Mus musculus OX=10090 GN=Lmo7 PE=1 SV=1	0.266932	0	0.000230657	78.661	53.342	78.661	0.25	0	0.00191515	52.453	0.266932	0	0.000230657	78.661			S	REDDTSGMLPTDRSKSRSTTELNDPLIEKNG	0	0	0	0	0	0	0	0
E9PYF4	1446	E9PYF4	E9PYF4		Lmo7	tr|E9PYF4|E9PYF4_MOUSE LIM domain only 7 OS=Mus musculus OX=10090 GN=Lmo7 PE=1 SV=1	0.876158	9.06849	0.00191515	63.894	35.261	45.915	0.876158	9.06849	0.00191515	59.185	0.641305	7.29461	0.0032148	63.894		1	S	DDTSGMLPTDRSKSRSTTELNDPLIEKNGSS	612.87	549.59	282.09	706.69	699.62	245.86	438.97	633.47
E9PYF4	699	E9PYF4	E9PYF4		Lmo7	tr|E9PYF4|E9PYF4_MOUSE LIM domain only 7 OS=Mus musculus OX=10090 GN=Lmo7 PE=1 SV=1	0.880562	10.1236	1.11e-15	157.75	114.23	117.7	0.785321	5.91947	1.11e-15	157.75	0.880562	10.1236	0.000447472	117.7		1	S	QKWQDDLAKWKNRRKSYTSDLQKKKEEREEI	20340	15762	1682.4	16749	10946	14989	10359	13208
E9PYH6	481	E9PYH6	E9PYH6	Histone-lysine N-methyltransferase	Setd1a	sp|E9PYH6|SET1A_MOUSE Histone-lysine N-methyltransferase SETD1A OS=Mus musculus OX=10090 GN=Setd1a PE=1 SV=1	0.456515	0	0.000333558	47.286	38.998	47.286	0.456515	0	0.000333558	47.286							S	REEARTPPRPASPARSGSPAPETTNESVPFA	0	0	0	0	0	0	0	0
E9PYH6	483	E9PYH6	E9PYH6	Histone-lysine N-methyltransferase	Setd1a	sp|E9PYH6|SET1A_MOUSE Histone-lysine N-methyltransferase SETD1A OS=Mus musculus OX=10090 GN=Setd1a PE=1 SV=1	0.812112	6.4184	5.35e-34	163.1	149.21	117.57	0.812112	6.4184	2.3e-14	117.57	0.805196	7.12298	5.35e-34	163.1		1	S	EARTPPRPASPARSGSPAPETTNESVPFAQH	142.98	366.55	330.3	331.12	313.26	320.61	0	254.27
E9PYL2	1069	E9PYL2	E9PYL2		Prr12	sp|E9PYL2|PRR12_MOUSE Proline-rich protein 12 OS=Mus musculus OX=10090 GN=Prr12 PE=1 SV=1	0.333333	0	0.056181	45.368	18.766	45.368					0.333333	0	0.056181	45.368			S	SPIFCSTKPKKLLKTSSFHLLRRRDPPFQTP	0	0	0	0	0	0	0	0
E9PYL2	1070	E9PYL2	E9PYL2		Prr12	sp|E9PYL2|PRR12_MOUSE Proline-rich protein 12 OS=Mus musculus OX=10090 GN=Prr12 PE=1 SV=1	0.833773	7.54225	0.000922276	94.85	65.083	94.85					0.833773	7.54225	0.000922276	94.85		1	S	PIFCSTKPKKLLKTSSFHLLRRRDPPFQTPK	0	0	0	0	0	0	0	0
E9PYY5	172	E9PYY5	E9PYY5	WD repeat-containing protein 78	Wdr78	sp|E9PYY5|DNAI4_MOUSE Dynein axonemal intermediate chain 4 OS=Mus musculus OX=10090 GN=Dnai4 PE=1 SV=1	0.593008	1.63475	0.0507878	43.083	18.928	43.083					0.593008	1.63475	0.0507878	43.083		1	S	SEDLEDSSYKRDRLASFTDVRVLRSTAEAAI	0	0	0	0	0	0	0	0
E9PYY5	25	E9PYY5	E9PYY5	WD repeat-containing protein 78	Wdr78	sp|E9PYY5|DNAI4_MOUSE Dynein axonemal intermediate chain 4 OS=Mus musculus OX=10090 GN=Dnai4 PE=1 SV=1	0.993861	22.0944	0.00526622	63.283	33.936	63.283					0.993861	22.0944	0.00526622	63.283		1	S	KQASFAASASAQPRKSISFINPSKSSAGKGY	0	0	0	0	0	0	0	0
E9PZ19	1207	E9PZ19	E9PZ19		Igsf9b	sp|E9PZ19|TUTLB_MOUSE Protein turtle homolog B OS=Mus musculus OX=10090 GN=Igsf9b PE=1 SV=1	0.999828	39.1589	4.2e-14	152.4	115.97	152.4	0.999828	39.1589	4.2e-14	152.4	0.978297	17.8814	1.06e-09	125.53		1	S	HQVVLQPSRLSPLTQSPLSSRTGSPELAARA	913.93	2636.6	1387.7	1642.3	609.9	1919.2	737.08	1767.7
E9PZM4	1365	E9PZM4	E9PZM4	Chromodomain-helicase-DNA-binding protein 2	Chd2	sp|E9PZM4|CHD2_MOUSE Chromodomain-helicase-DNA-binding protein 2 OS=Mus musculus OX=10090 GN=Chd2 PE=1 SV=1	1	50.1781	0.00327154	50.178	33.604	50.178					1	50.1781	0.00327154	50.178		1	S	NKAPRLKDEHGLEPASPRHSDNPSEEGEVKD	0	0	0	0	0	0	0	0
E9PZM7	821	E9PZM7	E9PZM7		Scaf11	tr|E9PZM7|E9PZM7_MOUSE SR-related CTD-associated factor 11 OS=Mus musculus OX=10090 GN=Scaf11 PE=1 SV=1	0.822408	7.49961	4.71e-06	104.24	81.77	104.24					0.822408	7.49961	4.71e-06	104.24		1	S	VDKAPKPRTRRSRFHSPSTTWSPNKDAAQEK	0	0	0	0	0	0	0	0
E9PZM7	823	E9PZM7	E9PZM7		Scaf11	tr|E9PZM7|E9PZM7_MOUSE SR-related CTD-associated factor 11 OS=Mus musculus OX=10090 GN=Scaf11 PE=1 SV=1	0.552418	1.15184	0.0010609	68.171	54.013	68.171					0.552418	1.15184	0.0010609	68.171		1	S	KAPKPRTRRSRFHSPSTTWSPNKDAAQEKRR	0	0	0	0	0	0	0	0
E9PZP8	2708	E9PZP8	E9PZP8		Herc1	tr|E9PZP8|E9PZP8_MOUSE HECT and RLD domain containing E3 ubiquitin protein ligase family member 1 OS=Mus musculus OX=10090 GN=Herc1 PE=1 SV=1	0.971411	18.2892	3.93e-08	98.073	88.614	98.073	0.971411	18.2892	3.93e-08	98.073	0.942658	12.8219	4.53e-05	82.01		1;2	S	PTRRAQTPPISSLPASPSDEVGRRQSLTSPD	0	0	0	0	0	0	0	0
E9PZP8	1491	E9PZP8	E9PZP8		Herc1	tr|E9PZP8|E9PZP8_MOUSE HECT and RLD domain containing E3 ubiquitin protein ligase family member 1 OS=Mus musculus OX=10090 GN=Herc1 PE=1 SV=1	0.942562	12.2325	0.00122718	82.261	56.875	82.261	0.942562	12.2325	0.00122718	82.261						1	S	SVSASEGTGLMTRSESLTAESRLVHASPSYR	817.6	1553.6	474.1	719.77	733.78	986.11	598.76	963.87
E9PZP8	1510	E9PZP8	E9PZP8		Herc1	tr|E9PZP8|E9PZP8_MOUSE HECT and RLD domain containing E3 ubiquitin protein ligase family member 1 OS=Mus musculus OX=10090 GN=Herc1 PE=1 SV=1	0.594171	1.94071	9.12e-18	142.2	125.13	142.2	0.594171	1.94071	9.12e-18	142.2						1	S	ESRLVHASPSYRLIKSRSESDLSQPESDEEG	751.12	1064.5	819.63	576.93	858.37	1033.7	817.56	867.11
E9PZP8	1512	E9PZP8	E9PZP8		Herc1	tr|E9PZP8|E9PZP8_MOUSE HECT and RLD domain containing E3 ubiquitin protein ligase family member 1 OS=Mus musculus OX=10090 GN=Herc1 PE=1 SV=1	0.777092	7.17624	1.16e-31	159.19	146.7	49.089	0.777092	7.17624	0.00204789	49.089	0.711003	5.08787	1.16e-31	159.19		1	S	RLVHASPSYRLIKSRSESDLSQPESDEEGYA	192.67	593.42	449.08	321.14	387.07	463.43	398.97	183.05
E9Q0S6	1054	E9Q0S6	E9Q0S6		Tns1	sp|E9Q0S6|TENS1_MOUSE Tensin-1 OS=Mus musculus OX=10090 GN=Tns1 PE=1 SV=1	0.999853	41.3094	5.94e-06	104.44	88.038	104.44	0.999853	41.3094	5.94e-06	104.44						1	S	RQPAEPPGPLRRRAASDGQYENQSPEATSPR	595.22	1050.5	573.14	1018.2	877.36	598.9	593.57	958.45
E9Q0S6	1062	E9Q0S6	E9Q0S6		Tns1	sp|E9Q0S6|TENS1_MOUSE Tensin-1 OS=Mus musculus OX=10090 GN=Tns1 PE=1 SV=1	0.999837	38.5874	4.1e-10	125.98	111.31	125.98	0.999837	38.5874	4.1e-10	125.98						1	S	PLRRRAASDGQYENQSPEATSPRSPGVRSPV	384.75	1220.2	616.78	881.61	557.27	893.58	521.19	664.61
E9Q0S6	1363	E9Q0S6	E9Q0S6		Tns1	sp|E9Q0S6|TENS1_MOUSE Tensin-1 OS=Mus musculus OX=10090 GN=Tns1 PE=1 SV=1	0.914017	11.6044	0.0001977	69.088	55.425	69.088	0.914017	11.6044	0.0001977	69.088						1	S	GFGRRAVNPTMAAPGSPSLSHRQVMGPSGPG	1608.1	1719.4	416.59	1343.6	551.05	1189.3	475.02	870.79
E9Q0S6	1013	E9Q0S6	E9Q0S6		Tns1	sp|E9Q0S6|TENS1_MOUSE Tensin-1 OS=Mus musculus OX=10090 GN=Tns1 PE=1 SV=1	0.426767	0	2.57e-16	127.63	116.52	127.63					0.426767	0	2.57e-16	127.63			S	IAQPQLPPKETTSDPSRTPEEEPLNLEGLVA	0	0	0	0	0	0	0	0
E9Q0S6	1468	E9Q0S6	E9Q0S6		Tns1	sp|E9Q0S6|TENS1_MOUSE Tensin-1 OS=Mus musculus OX=10090 GN=Tns1 PE=1 SV=1	0.966788	14.8164	0.000349457	71.344	44.717	71.344	0.966788	14.8164	0.000349457	71.344	0.797404	5.96104	0.00362976	42.64		1	S	SLGRHLGGSGSVVPGSPSLDRHAAYGGYSTP	676.35	1138.8	1016.8	1128.2	474.08	510.37	358.99	875.53
E9Q0S6	1535	E9Q0S6	E9Q0S6		Tns1	sp|E9Q0S6|TENS1_MOUSE Tensin-1 OS=Mus musculus OX=10090 GN=Tns1 PE=1 SV=1	0.965469	14.4653	3.49e-10	138.77	108.51	138.77	0.965469	14.4653	3.49e-10	138.77	0.702083	3.72294	6.35e-05	96.734		1	S	PATSPSPDSAAFRQGSPTPALPEKRRMSVGD	6470.9	9965.6	1571	9592.3	5132.7	7666.3	5195.3	7316.8
E9Q0S6	836	E9Q0S6	E9Q0S6		Tns1	sp|E9Q0S6|TENS1_MOUSE Tensin-1 OS=Mus musculus OX=10090 GN=Tns1 PE=1 SV=1	0.999163	30.7703	0.00165543	61.732	48.965	61.732	0.999163	30.7703	0.00165543	61.732						1	S	WQQQQPHPPPRQQERSPLQSLARSKPSPQLS	535.95	806.02	468.24	462.46	452.26	477.16	404.69	455.68
E9Q0S6	792	E9Q0S6	E9Q0S6		Tns1	sp|E9Q0S6|TENS1_MOUSE Tensin-1 OS=Mus musculus OX=10090 GN=Tns1 PE=1 SV=1	0.999835	37.9393	8.58e-10	123.36	109.42	115.5	0.999835	37.9393	1.07e-06	115.5	0.987309	18.9244	8.58e-10	123.36		1	S	SAHCGCDPSGLFRSQSFPDVEPQLPQAPTRG	815.03	1420.8	1000.8	1079	806.47	761.82	950.92	994.37
E9Q0S6	1346	E9Q0S6	E9Q0S6		Tns1	sp|E9Q0S6|TENS1_MOUSE Tensin-1 OS=Mus musculus OX=10090 GN=Tns1 PE=1 SV=1	0.998321	27.7526	7.28e-16	136.83	113.36	136.83	0.9899	19.9273	0.000306894	91.441	0.998321	27.7526	7.28e-16	136.83		1	S	SPQARHRTVGTNTPPSPGFGRRAVNPTMAAP	1444.8	2954.1	2030.8	2083.5	1789.6	2337.2	1734.8	1917.6
E9Q1M1	947	E9Q1M1	E9Q1M1		Pdzd2	tr|E9Q1M1|E9Q1M1_MOUSE PDZ domain containing 2 OS=Mus musculus OX=10090 GN=Pdzd2 PE=1 SV=1	0.995167	23.1368	7.46e-09	112.44	87.806	112.44					0.995167	23.1368	7.46e-09	112.44		1	S	GSGLLHKQVTVARQASLPGSPQVLRNPLLRQ	0	0	0	0	0	0	0	0
E9Q1M1	951	E9Q1M1	E9Q1M1		Pdzd2	tr|E9Q1M1|E9Q1M1_MOUSE PDZ domain containing 2 OS=Mus musculus OX=10090 GN=Pdzd2 PE=1 SV=1	0.747065	4.70349	0.000351646	86.772	63.753	86.772	0.747065	4.70349	0.000351646	86.772						1	S	LHKQVTVARQASLPGSPQVLRNPLLRQRRVR	352.61	1459.6	580.52	1763.7	273.96	1385.8	595.21	853.13
E9Q1P8	169	E9Q1P8	E9Q1P8	Interferon regulatory factor 2-binding protein 2	Irf2bp2	sp|E9Q1P8|I2BP2_MOUSE Interferon regulatory factor 2-binding protein 2 OS=Mus musculus OX=10090 GN=Irf2bp2 PE=1 SV=1	1	45.7899	4.36e-24	157.11	143.13	45.79	1	45.7899	0.00405796	45.79	1	103.875	4.36e-24	157.11		1	S	NGFSKLEEPPELNRQSPNPRRAHAVPPTLVP	362.74	773.91	217.48	672.83	123.11	551.57	383.48	361.14
E9Q1P8	343	E9Q1P8	E9Q1P8	Interferon regulatory factor 2-binding protein 2	Irf2bp2	sp|E9Q1P8|I2BP2_MOUSE Interferon regulatory factor 2-binding protein 2 OS=Mus musculus OX=10090 GN=Irf2bp2 PE=1 SV=1	1	48.5467	0.00224307	57.348	41.459	48.547	1	48.5467	0.00398185	48.547	1	57.3483	0.00224307	57.348		1	S	NGSKAVARTARKRKPSPEPEGEVGPPKINGE	481.22	778.1	542.32	627.31	412.49	530.34	443.7	475.36
E9Q238	325	E9Q238	E9Q238		Kank1	tr|E9Q238|E9Q238_MOUSE KN motif and ankyrin repeat domains 1 OS=Mus musculus OX=10090 GN=Kank1 PE=1 SV=1	0.995217	23.1871	0.000381268	88.561	72.68	88.561	0.99516	23.1665	0.000645905	71.344	0.995217	23.1871	0.000381268	88.561		1	S	ASSQNEACGVRKRSYSAGNASQLELLARARR	878.66	750.19	534.13	554.93	530.06	750.56	758.18	636.76
E9Q271	333	E9Q271	E9Q271		Wdr17	tr|E9Q271|E9Q271_MOUSE WD repeat domain 17 OS=Mus musculus OX=10090 GN=Wdr17 PE=1 SV=2	0.999999	59.9475	1.68e-10	153.05	94.23	147.75	0.999999	59.9475	3.73e-10	147.75	0.999848	38.1868	1.68e-10	153.05		1	S	FHVVNSPPKKKFSVQSPNKNHYISSTSEAVP	6124.4	6964.1	892.89	5232.7	5183.6	6289.7	5479.5	4857.6
E9Q2E4	1498	E9Q2E4	E9Q2E4		Gm15800	tr|E9Q2E4|E9Q2E4_MOUSE HECT domain E3 ubiquitin protein ligase 4 OS=Mus musculus OX=10090 GN=Hectd4 PE=1 SV=2	0.998788	29.1764	1.92e-36	189.33	158.14	189.33	0.998788	29.1764	1.92e-36	189.33						1	S	LHVTIAAQAGLTRSISGTPAETPACKSASET	980.42	2533.5	1050	1986	1130	1447.7	1086.3	1532.5
E9Q2E4	1528	E9Q2E4	E9Q2E4		Gm15800	tr|E9Q2E4|E9Q2E4_MOUSE HECT domain E3 ubiquitin protein ligase 4 OS=Mus musculus OX=10090 GN=Hectd4 PE=1 SV=2	0.387765	0	0.000355581	50.851	42.664	50.851					0.387765	0	0.000355581	50.851			S	TKVASHAVRQPVFLRSMSAPSDLEMIGNEDL	0	0	0	0	0	0	0	0
E9Q2E4	1530	E9Q2E4	E9Q2E4		Gm15800	tr|E9Q2E4|E9Q2E4_MOUSE HECT domain E3 ubiquitin protein ligase 4 OS=Mus musculus OX=10090 GN=Hectd4 PE=1 SV=2	0.779316	6.27389	0.000355581	50.851	42.664	48.907					0.779316	6.27389	0.000355581	50.851		1	S	VASHAVRQPVFLRSMSAPSDLEMIGNEDLEF	0	0	0	0	0	0	0	0
E9Q2E4	1562	E9Q2E4	E9Q2E4		Gm15800	tr|E9Q2E4|E9Q2E4_MOUSE HECT domain E3 ubiquitin protein ligase 4 OS=Mus musculus OX=10090 GN=Hectd4 PE=1 SV=2	0.711315	7.95299	0.000627401	69.594	55.175	69.594					0.711315	7.95299	0.000627401	69.594		1	S	RANQRRRHVTSHRSSSFTLLQSLAIEDSRDK	0	0	0	0	0	0	0	0
E9Q2E4	2137	E9Q2E4	E9Q2E4		Gm15800	tr|E9Q2E4|E9Q2E4_MOUSE HECT domain E3 ubiquitin protein ligase 4 OS=Mus musculus OX=10090 GN=Hectd4 PE=1 SV=2	0.333333	0	0.000191155	87.287	70.543	80.638	0.333329	0	0.000191155	87.287	0.333333	0	0.000192841	80.638			S	IPQLGKYAESILENGSSSGRKLAKLQRIARQ	0	0	0	0	0	0	0	0
E9Q2E4	2138	E9Q2E4	E9Q2E4		Gm15800	tr|E9Q2E4|E9Q2E4_MOUSE HECT domain E3 ubiquitin protein ligase 4 OS=Mus musculus OX=10090 GN=Hectd4 PE=1 SV=2	0.333333	0	0.000191155	87.287	70.543	80.638	0.333329	0	0.000191155	87.287	0.333333	0	0.000192841	80.638			S	PQLGKYAESILENGSSSGRKLAKLQRIARQA	0	0	0	0	0	0	0	0
E9Q2E4	2139	E9Q2E4	E9Q2E4		Gm15800	tr|E9Q2E4|E9Q2E4_MOUSE HECT domain E3 ubiquitin protein ligase 4 OS=Mus musculus OX=10090 GN=Hectd4 PE=1 SV=2	0.45517	2.22943	2.05e-05	109.84	95.874	109.84	0.333329	0	0.000191155	87.287	0.45517	2.22943	2.05e-05	109.84			S	QLGKYAESILENGSSSGRKLAKLQRIARQAV	0	0	0	0	0	0	0	0
E9Q343	351	E9Q343	E9Q343		Gpr137c	sp|E9Q343|G137C_MOUSE G protein-coupled receptor 137C OS=Mus musculus OX=10090 GN=Gpr137c PE=3 SV=1	1	43.3824	1.11e-11	122.51	99.275	43.382	1	43.3824	1.11e-11	122.51						1	S	YSSRAFFFDNPRRYDSDDDLPRLGNSREGSL	0	0	0	0	0	0	0	0
E9Q394	1892	E9Q394	E9Q394		Akap13	sp|E9Q394|AKP13_MOUSE A-kinase anchor protein 13 OS=Mus musculus OX=10090 GN=Akap13 PE=1 SV=1	0.891238	9.24132	0.00142673	78.692	40.058	78.692					0.891238	9.24132	0.00142673	78.692		1	S	GNDENMSNTWKFLSHSTDSLNKICKVNESTE	0	0	0	0	0	0	0	0
E9Q394	2692	E9Q394	E9Q394		Akap13	sp|E9Q394|AKP13_MOUSE A-kinase anchor protein 13 OS=Mus musculus OX=10090 GN=Akap13 PE=1 SV=1	0.955024	13.4171	0.00313865	58.674	41.238	58.674					0.955024	13.4171	0.00313865	58.674		1	S	PSVTKSGSLDSELSVSPKRNSISRTQKDKGP	0	0	0	0	0	0	0	0
E9Q3C1	436	E9Q3C1	E9Q3C1		C2cd2	sp|E9Q3C1|C2CD2_MOUSE C2 domain-containing protein 2 OS=Mus musculus OX=10090 GN=C2cd2 PE=1 SV=1	0.970607	16.0294	0.000114714	80.752	70.471	80.752	0.970607	16.0294	0.000114714	80.752						1	S	KPRFDTGRATPLNSESPVRTPVTVKVIEKDI	2083.3	3450.2	3135	2983.6	2077	2934.6	1414.8	2432.8
E9Q3C1	647	E9Q3C1	E9Q3C1		C2cd2	sp|E9Q3C1|C2CD2_MOUSE C2 domain-containing protein 2 OS=Mus musculus OX=10090 GN=C2cd2 PE=1 SV=1	0.577989	1.36596	8.71e-05	64.488	54.506	64.488					0.577989	1.36596	8.71e-05	64.488		1	S	KLFFRRRHQQKDPGLSQSHNDLVFLQQPEGR	0	0	0	0	0	0	0	0
E9Q3G8	335	E9Q3G8	E9Q3G8		Nup153	tr|E9Q3G8|E9Q3G8_MOUSE Nucleoporin 153 OS=Mus musculus OX=10090 GN=Nup153 PE=1 SV=1	0.819288	6.62725	0.000618789	58.672	43.641	58.672					0.819288	6.62725	0.000618789	58.672		1	S	SSPLADAKRIPSAVSSPLNSPLDRSGIDNTV	0	0	0	0	0	0	0	0
E9Q3L2	259	E9Q3L2	E9Q3L2		Pi4ka	sp|E9Q3L2|PI4KA_MOUSE Phosphatidylinositol 4-kinase alpha OS=Mus musculus OX=10090 GN=Pi4ka PE=1 SV=2	0.780258	6.21001	0.00675154	48.527	16.198	48.527	0.780258	6.21001	0.00675154	48.527						1	S	NLLTVCQEGTLKRKTSSVSSISQVSPERGIP	470.26	975.02	688.45	921.4	432.46	1331.6	669.55	751.55
E9Q3L2	268	E9Q3L2	E9Q3L2		Pi4ka	sp|E9Q3L2|PI4KA_MOUSE Phosphatidylinositol 4-kinase alpha OS=Mus musculus OX=10090 GN=Pi4ka PE=1 SV=2	1	115.308	0	368.94	335.78	337.03	1	115.308	0	337.03	1	93.9636	0	368.94		1	S	TLKRKTSSVSSISQVSPERGIPPPSSPGGSA	12199	19865	11885	10910	12024	12348	10812	15221
E9Q3L2	1427	E9Q3L2	E9Q3L2		Pi4ka	sp|E9Q3L2|PI4KA_MOUSE Phosphatidylinositol 4-kinase alpha OS=Mus musculus OX=10090 GN=Pi4ka PE=1 SV=2	0.999771	36.4265	3.71e-56	203.06	169.27	140.84	0.999139	30.6473	3.71e-56	203.06	0.999771	36.4265	3.19e-15	140.84		1	S	KFWTAMFSDKKYLTASQLVPPDNQDTRSNLD	2811.3	8230.6	4034.3	6934	2465.8	7343.8	3906.4	6083.6
E9Q3M9	153	E9Q3M9	E9Q3M9		2010300C02Rik	tr|E9Q3M9|E9Q3M9_MOUSE Capping protein inhibiting regulator of actin like OS=Mus musculus OX=10090 GN=Cracdl PE=1 SV=1	0.241366	0	2.3e-05	49.199	32.929	40.545	0.241366	0	2.3e-05	49.199							S	PPGGLPIKRAEETGMSSEDDGLPRSPPEMSL	0	0	0	0	0	0	0	0
E9Q3M9	154	E9Q3M9	E9Q3M9		2010300C02Rik	tr|E9Q3M9|E9Q3M9_MOUSE Capping protein inhibiting regulator of actin like OS=Mus musculus OX=10090 GN=Cracdl PE=1 SV=1	0.241366	0	2.3e-05	49.199	32.929	40.545	0.241366	0	2.3e-05	49.199							S	PGGLPIKRAEETGMSSEDDGLPRSPPEMSLL	0	0	0	0	0	0	0	0
E9Q3M9	92	E9Q3M9	E9Q3M9		2010300C02Rik	tr|E9Q3M9|E9Q3M9_MOUSE Capping protein inhibiting regulator of actin like OS=Mus musculus OX=10090 GN=Cracdl PE=1 SV=1	0.977372	16.5359	5.17e-24	155.97	136.21	58.09	0.961459	13.9701	5.17e-24	155.97	0.977372	16.5359	0.000205779	58.09		1	S	DELEESRGTMGSRALSHDSIFFPESGQDPAR	4599.3	2604.4	2199.3	2535.7	2272.9	1616.1	1664.5	2122.9
E9Q3M9	728	E9Q3M9	E9Q3M9		2010300C02Rik	tr|E9Q3M9|E9Q3M9_MOUSE Capping protein inhibiting regulator of actin like OS=Mus musculus OX=10090 GN=Cracdl PE=1 SV=1	0.485033	0	4.16e-106	242.07	205.49	242.07					0.485033	0	4.16e-106	242.07			S	PPVPKSCLKHKALVTSGSPAESPLKEPGPAV	0	0	0	0	0	0	0	0
E9Q3M9	730	E9Q3M9	E9Q3M9		2010300C02Rik	tr|E9Q3M9|E9Q3M9_MOUSE Capping protein inhibiting regulator of actin like OS=Mus musculus OX=10090 GN=Cracdl PE=1 SV=1	0.995831	24.1113	4.16e-106	242.07	205.49	178.58	0.995831	24.1113	4.35e-33	178.58	0.485033	0	4.16e-106	242.07		1	S	VPKSCLKHKALVTSGSPAESPLKEPGPAVQD	3182.9	1267.1	225.08	1803.1	1943.3	1083.8	1177.9	1530.8
E9Q3M9	1150	E9Q3M9	E9Q3M9		2010300C02Rik	tr|E9Q3M9|E9Q3M9_MOUSE Capping protein inhibiting regulator of actin like OS=Mus musculus OX=10090 GN=Cracdl PE=1 SV=1	0.491995	0	0.002604	50.843	35.871	50.843	0.491995	0	0.002604	50.843							S	TTEKELHQLKRASYASTDQPSWMELARKKSQ	0	0	0	0	0	0	0	0
E9Q3M9	612	E9Q3M9	E9Q3M9		2010300C02Rik	tr|E9Q3M9|E9Q3M9_MOUSE Capping protein inhibiting regulator of actin like OS=Mus musculus OX=10090 GN=Cracdl PE=1 SV=1	0.979866	16.8724	0.000170389	93.959	70.724	49.593	0.962772	14.1265	0.000170389	93.959	0.979866	16.8724	0.000233324	85.522		1	S	VAPPKKIMAPPERDLSPSEGDVAPPKRIMAP	7362.7	7726.4	2766.8	5052	9632.7	4661.7	5646.5	5211.7
E9Q3M9	614	E9Q3M9	E9Q3M9		2010300C02Rik	tr|E9Q3M9|E9Q3M9_MOUSE Capping protein inhibiting regulator of actin like OS=Mus musculus OX=10090 GN=Cracdl PE=1 SV=1	0.598271	1.72964	1.21e-16	135.68	114.45	135.68	0.598271	1.72964	1.21e-16	135.68						1	S	PPKKIMAPPERDLSPSEGDVAPPKRIMAPPE	6311.6	5810.3	1146.7	4259.9	4492.2	4437	5272.2	3738
E9Q3M9	507	E9Q3M9	E9Q3M9		2010300C02Rik	tr|E9Q3M9|E9Q3M9_MOUSE Capping protein inhibiting regulator of actin like OS=Mus musculus OX=10090 GN=Cracdl PE=1 SV=1	1	45.2567	1.1e-16	136.57	123.24	45.257	1	45.2567	1.1e-16	136.57	1	69.7372	5.25e-05	75.483		1	S	VAPPKRIMAPPERDMSPPEGDVAPPKKIMAP	105000	95251	39362	80801	105480	68854	96350	74557
E9Q3M9	570	E9Q3M9	E9Q3M9		2010300C02Rik	tr|E9Q3M9|E9Q3M9_MOUSE Capping protein inhibiting regulator of actin like OS=Mus musculus OX=10090 GN=Cracdl PE=1 SV=1	0.965032	14.4087	0.000259686	59.57	46.142	59.57	0.965032	14.4087	0.000259686	59.57	0.959244	13.7174	0.00536785	53.448		1	S	VAPPKKIMAPPERDMSPSEGDVAPPKKIMAP	3194.4	3311.2	1326.5	1985.9	4384.1	1987.7	2949.5	2480.2
E9Q3M9	572	E9Q3M9	E9Q3M9		2010300C02Rik	tr|E9Q3M9|E9Q3M9_MOUSE Capping protein inhibiting regulator of actin like OS=Mus musculus OX=10090 GN=Cracdl PE=1 SV=1	0.646632	2.62431	3.54e-07	88.836	76.402	88.836	0.646632	2.62431	3.54e-07	88.836						1	S	PPKKIMAPPERDMSPSEGDVAPPKKIMAPPE	11589	10776	3493.7	8067.5	13564	7286.3	9372	8094.8
E9Q3M9	712	E9Q3M9	E9Q3M9		2010300C02Rik	tr|E9Q3M9|E9Q3M9_MOUSE Capping protein inhibiting regulator of actin like OS=Mus musculus OX=10090 GN=Cracdl PE=1 SV=1	0.993825	28.0877	5.94e-15	88.226	72.212	88.226	0.993825	28.0877	5.94e-15	88.226						1	S	RPEGVGTESSTAPAPSPPVPKSCLKHKALVT	639.1	600.63	0	346.37	337.23	291.83	349.43	489.77
E9Q3M9	47	E9Q3M9	E9Q3M9		2010300C02Rik	tr|E9Q3M9|E9Q3M9_MOUSE Capping protein inhibiting regulator of actin like OS=Mus musculus OX=10090 GN=Cracdl PE=1 SV=1	0.966483	15.0726	1.18e-09	124.51	104.73	124.51	0.966483	15.0726	1.18e-09	124.51						1	S	TFKKLFGKKKRKESPSPTGNSAWKQNPAKSE	5360.1	3937	1232.2	4033.9	2722.3	2836.3	2006.8	2530.7
E9Q3M9	675	E9Q3M9	E9Q3M9		2010300C02Rik	tr|E9Q3M9|E9Q3M9_MOUSE Capping protein inhibiting regulator of actin like OS=Mus musculus OX=10090 GN=Cracdl PE=1 SV=1	0.835433	7.85429	2.08e-28	127.21	115.69	127.21	0.835433	7.85429	2.08e-28	127.21						1	S	TPPPETITDTNLETPSDTERQDQSVQKEEEL	3023.7	2309.5	588.03	2287.2	2522.1	1801.6	2331.7	2160
E9Q3M9	1123	E9Q3M9	E9Q3M9		2010300C02Rik	tr|E9Q3M9|E9Q3M9_MOUSE Capping protein inhibiting regulator of actin like OS=Mus musculus OX=10090 GN=Cracdl PE=1 SV=1	0.968071	14.8173	4.25e-08	120.32	97.115	120.32	0.968071	14.8173	4.25e-08	120.32						1	S	QGSKLNLKEGLQRGISLSHQNLAQAAATTEK	1119.6	1213.8	557.46	1036	930.51	1001.6	584.25	733.96
E9Q3M9	1125	E9Q3M9	E9Q3M9		2010300C02Rik	tr|E9Q3M9|E9Q3M9_MOUSE Capping protein inhibiting regulator of actin like OS=Mus musculus OX=10090 GN=Cracdl PE=1 SV=1	0.524235	0.421481	0.000657387	52.483	37.061	52.483					0.524235	0.421481	0.000657387	52.483		1	S	SKLNLKEGLQRGISLSHQNLAQAAATTEKEL	0	0	0	0	0	0	0	0
E9Q3M9	465	E9Q3M9	E9Q3M9		2010300C02Rik	tr|E9Q3M9|E9Q3M9_MOUSE Capping protein inhibiting regulator of actin like OS=Mus musculus OX=10090 GN=Cracdl PE=1 SV=1	0.978394	16.5594	0.00579404	46.481	32.802	45.14	0.978394	16.5594	0.00579404	46.481						1	S	TTPHKGVMEPPERDMSPSKDNMAPPKRIIAP	10658	7096.3	1609.2	7765.7	4335.1	5567.1	5153.4	5590
E9Q3M9	189	E9Q3M9	E9Q3M9		2010300C02Rik	tr|E9Q3M9|E9Q3M9_MOUSE Capping protein inhibiting regulator of actin like OS=Mus musculus OX=10090 GN=Cracdl PE=1 SV=1	0.994872	23.0672	2.95e-54	191.62	165.49	191.62	0.993222	26.2923	4.77e-11	120.15	0.994872	23.0672	2.95e-54	191.62		1	S	PGTTIKILVSSSRPQSPDHMSDASISSRTLD	10962	6014.3	5994.5	4810.4	7853.6	4934.8	4565.9	7661.4
E9Q3M9	194	E9Q3M9	E9Q3M9		2010300C02Rik	tr|E9Q3M9|E9Q3M9_MOUSE Capping protein inhibiting regulator of actin like OS=Mus musculus OX=10090 GN=Cracdl PE=1 SV=1	0.749644	4.82249	5.05e-09	98.269	84.003	98.269	0.749644	4.82249	5.05e-09	98.269						1	S	KILVSSSRPQSPDHMSDASISSRTLDGSLAP	4240.7	2453.4	1633.1	1917.7	3465.7	1718.1	1465.5	2463.4
E9Q3M9	1094	E9Q3M9	E9Q3M9		2010300C02Rik	tr|E9Q3M9|E9Q3M9_MOUSE Capping protein inhibiting regulator of actin like OS=Mus musculus OX=10090 GN=Cracdl PE=1 SV=1	0.996844	24.9942	0.00343663	77.677	31.681	77.677	0.996844	24.9942	0.00343663	77.677						1	S	RAQESVKQGDFVRSKSFLMTPAKPAVTQRQG	2767	2675.7	108.54	2423.8	1482.6	2884.3	1365.6	1327.4
E9Q3M9	898	E9Q3M9	E9Q3M9		2010300C02Rik	tr|E9Q3M9|E9Q3M9_MOUSE Capping protein inhibiting regulator of actin like OS=Mus musculus OX=10090 GN=Cracdl PE=1 SV=1	0.973841	16.6435	0.0248776	57.59	24.327	57.59					0.973841	16.6435	0.0248776	57.59		1	S	NGEDQSPFPVKLRSTSLSLKYRDSSAQEAKA	0	0	0	0	0	0	0	0
E9Q3M9	900	E9Q3M9	E9Q3M9		2010300C02Rik	tr|E9Q3M9|E9Q3M9_MOUSE Capping protein inhibiting regulator of actin like OS=Mus musculus OX=10090 GN=Cracdl PE=1 SV=1	0.999338	31.8095	0.00138028	99.802	40.557	99.802	0.999338	31.8095	0.00138028	99.802						1	S	EDQSPFPVKLRSTSLSLKYRDSSAQEAKAIK	4088.7	4963	547.03	4232.8	3292.1	3633.5	2240.2	3351.7
E9Q3M9	961	E9Q3M9	E9Q3M9		2010300C02Rik	tr|E9Q3M9|E9Q3M9_MOUSE Capping protein inhibiting regulator of actin like OS=Mus musculus OX=10090 GN=Cracdl PE=1 SV=1	0.973973	15.7313	2.53e-21	148.72	127.86	117.65	0.795445	5.89844	0.000302197	83.404	0.973973	15.7313	2.53e-21	148.72		1	S	RGSRSPNGQGKGKTRSPEQPGTKPPLPRKPL	5618.1	4216.5	3146	3876.1	4200.4	2864.3	3562.5	2801.3
E9Q3M9	113	E9Q3M9	E9Q3M9		2010300C02Rik	tr|E9Q3M9|E9Q3M9_MOUSE Capping protein inhibiting regulator of actin like OS=Mus musculus OX=10090 GN=Cracdl PE=1 SV=1	1	116.238	7.28e-06	116.24	102.58	116.24	1	116.238	7.28e-06	116.24	1	74.6982	0.000738616	82.705		1	S	FPESGQDPARPVRVFSQENVCDRIKALQLKI	1742	1260.5	684.82	1330.1	993.74	1225	1018.5	1129.2
E9Q3R9	435	E9Q3R9	E9Q3R9		Zbtb21	tr|E9Q3R9|E9Q3R9_MOUSE Zinc finger and BTB domain containing 21 OS=Mus musculus OX=10090 GN=Zbtb21 PE=1 SV=1	0.748202	6.80969	1.06e-06	117.93	96.06	117.93					0.748202	6.80969	1.06e-06	117.93		1	S	EASPVTEVRIKTEPSSPLSDPSDIIRVTVGG	0	0	0	0	0	0	0	0
E9Q401	2362	E9Q401	E9Q401	Ryanodine receptor 2	Ryr2	sp|E9Q401|RYR2_MOUSE Ryanodine receptor 2 OS=Mus musculus OX=10090 GN=Ryr2 PE=1 SV=1	0.997322	27.4993	9.47e-30	162.59	142.16	162.59	0.997167	26.0486	2.49e-14	135.09	0.997322	27.4993	9.47e-30	162.59		1	S	EEAIKIAEDPSRDGPSPTSGSSKTLDIEEEE	20538	27012	13854	22276	9542.5	23735	16830	21986
E9Q401	2807	E9Q401	E9Q401	Ryanodine receptor 2	Ryr2	sp|E9Q401|RYR2_MOUSE Ryanodine receptor 2 OS=Mus musculus OX=10090 GN=Ryr2 PE=1 SV=1	0.995221	24.7174	6.49e-06	90.475	69.661	75.548					0.995221	24.7174	6.49e-06	90.475		1	S	REGDSMALYNRTRRISQTSQVSIDAAHGYSP	0	0	0	0	0	0	0	0
E9Q401	2810	E9Q401	E9Q401	Ryanodine receptor 2	Ryr2	sp|E9Q401|RYR2_MOUSE Ryanodine receptor 2 OS=Mus musculus OX=10090 GN=Ryr2 PE=1 SV=1	0.348453	0	0.000430474	57.147	34.047	57.147					0.348453	0	0.000430474	57.147			S	DSMALYNRTRRISQTSQVSIDAAHGYSPRAI	0	0	0	0	0	0	0	0
E9Q401	2813	E9Q401	E9Q401	Ryanodine receptor 2	Ryr2	sp|E9Q401|RYR2_MOUSE Ryanodine receptor 2 OS=Mus musculus OX=10090 GN=Ryr2 PE=1 SV=1	0.997628	27.1162	1.19e-05	93.583	83.532	93.583	0.997628	27.1162	1.19e-05	93.583	0.990127	21.5469	0.000285478	59.814		1	S	ALYNRTRRISQTSQVSIDAAHGYSPRAIDMS	325.68	560.51	519.94	362.61	151.12	343.37	134.91	163.82
E9Q401	2693	E9Q401	E9Q401	Ryanodine receptor 2	Ryr2	sp|E9Q401|RYR2_MOUSE Ryanodine receptor 2 OS=Mus musculus OX=10090 GN=Ryr2 PE=1 SV=1	0.746453	5.0969	5.83e-17	128.92	117	128.92	0.746453	5.0969	5.83e-17	128.92						1	S	DYMESNYVSMMEKQSSMDSEGNFNPQPVDTS	7489.1	11241	1885.6	7158.8	6766.8	8713.8	7068.4	8758.6
E9Q4M0	423	E9Q4M0	E9Q4M0		Tmem44	tr|E9Q4M0|E9Q4M0_MOUSE Transmembrane protein 44 OS=Mus musculus OX=10090 GN=Tmem44 PE=1 SV=1	0.951436	12.9235	0.0219786	57.434	44.007	57.434					0.951436	12.9235	0.0219786	57.434		1	S	RKKDGELLRVQVRRASLSPVDLASDD_____	0	0	0	0	0	0	0	0
E9Q4N7	1818	E9Q4N7	E9Q4N7		Arid1b	sp|E9Q4N7|ARI1B_MOUSE AT-rich interactive domain-containing protein 1B OS=Mus musculus OX=10090 GN=Arid1b PE=1 SV=2	0.5	0	4.24e-90	236.4	202.62	236.4	0.5	0	4.24e-90	236.4	0.5	0	4.93e-50	193.45		1	S	EEEEEDSEKIESEGKSSPALAAPDASVDPKE	4064.2	5342.1	482.06	5127.5	3026.8	5087.7	3392.4	4018
E9Q4N7	1819	E9Q4N7	E9Q4N7		Arid1b	sp|E9Q4N7|ARI1B_MOUSE AT-rich interactive domain-containing protein 1B OS=Mus musculus OX=10090 GN=Arid1b PE=1 SV=2	0.5	0	4.24e-90	236.4	202.62	236.4	0.5	0	4.24e-90	236.4	0.5	0	4.93e-50	193.45		1	S	EEEEDSEKIESEGKSSPALAAPDASVDPKET	4064.2	5342.1	482.06	5127.5	3026.8	5087.7	3392.4	4018
E9Q4S1	402	E9Q4S1	E9Q4S1	High affinity cAMP-specific and IBMX-insensitive 3'
E9Q4S1	404	E9Q4S1	E9Q4S1	High affinity cAMP-specific and IBMX-insensitive 3'
E9Q4S1	405	E9Q4S1	E9Q4S1	High affinity cAMP-specific and IBMX-insensitive 3'
E9Q4S1	497	E9Q4S1	E9Q4S1	High affinity cAMP-specific and IBMX-insensitive 3'
E9Q557	1771	E9Q557	E9Q557	Desmoplakin	Dsp	sp|E9Q557|DESP_MOUSE Desmoplakin OS=Mus musculus OX=10090 GN=Dsp PE=1 SV=1	0.999782	36.6136	0.0403917	42.395	25.453	42.395	0.999782	36.6136	0.0403917	42.395						1	S	DKNSTISELRSQLQISNNRTLELQGLINDLQ	464.45	0	107.57	296.91	0	110.58	128.32	182.88
E9Q5C9	701	E9Q5C9	E9Q5C9		Nolc1	sp|E9Q5C9|NOLC1_MOUSE Nucleolar and coiled-body phosphoprotein 1 OS=Mus musculus OX=10090 GN=Nolc1 PE=1 SV=1	0.999806	37.1313	5.3e-46	186.43	166.69	186.43					0.999806	37.1313	5.3e-46	186.43		1	S	RGGSISVQVNSVKFDSE______________	0	0	0	0	0	0	0	0
E9Q5F9	614	E9Q5F9	E9Q5F9	Histone-lysine N-methyltransferase SETD2	Setd2	sp|E9Q5F9|SETD2_MOUSE Histone-lysine N-methyltransferase SETD2 OS=Mus musculus OX=10090 GN=Setd2 PE=1 SV=1	0.473578	0	0.0184523	45.014	30.323	45.014	0.473578	0	0.0184523	45.014							S	ELRTINKISEREKTGSPTPSNQLNDSPTFKK	0	0	0	0	0	0	0	0
E9Q5K9	309	E9Q5K9	E9Q5K9	YTH domain-containing protein 1	Ythdc1	sp|E9Q5K9|YTDC1_MOUSE YTH domain-containing protein 1 OS=Mus musculus OX=10090 GN=Ythdc1 PE=1 SV=2	1	98.0402	4.06e-05	98.04	75.211	98.04	1	98.0402	4.06e-05	98.04	1	67.3338	0.00402436	67.334		1	S	GSDEKKKERKRARGISPIVFDRSGSSASESY	990.01	1440.5	979.17	1166	1377.5	1334.9	1232.7	1433.1
E9Q5M4	687	E9Q5M4	E9Q5M4		Zfr2	tr|E9Q5M4|E9Q5M4_MOUSE Zinc finger RNA binding protein 2 OS=Mus musculus OX=10090 GN=Zfr2 PE=1 SV=1	1	42.3818	0.00309395	42.382	23.058	42.382					1	42.3818	0.00309395	42.382		1	S	MREDPSVKQGQQDALSDPEDVLDRERCLETL	0	0	0	0	0	0	0	0
E9Q5M4	130	E9Q5M4	E9Q5M4		Zfr2	tr|E9Q5M4|E9Q5M4_MOUSE Zinc finger RNA binding protein 2 OS=Mus musculus OX=10090 GN=Zfr2 PE=1 SV=1	0.999702	36.0838	2.37e-05	76.21	51.616	52.026	0.98783	19.5291	2.37e-05	76.21	0.999702	36.0838	6.94e-05	67.413		1	S	ERPARSLCRPGPSSRSPDSDSVSPGPQRPPP	558.01	1368.8	805.13	691.96	1604.3	670.18	723.65	906.74
E9Q616	5504	E9Q616	E9Q616		Ahnak	tr|E9Q616|E9Q616_MOUSE AHNAK nucleoprotein (desmoyokin) OS=Mus musculus OX=10090 GN=Ahnak PE=1 SV=1	0.986358	18.8864	5.83e-33	171.76	140.76	171.76	0.842592	7.39423	2.62e-06	112.42	0.986358	18.8864	5.83e-33	171.76		1	S	KHIFSKSKGKGGVTGSPEASISGSKGDLKSS	2016.4	1304	521.78	823.14	1055.1	903.24	1377.5	1935.1
E9Q616	211	E9Q616	E9Q616		Ahnak	tr|E9Q616|E9Q616_MOUSE AHNAK nucleoprotein (desmoyokin) OS=Mus musculus OX=10090 GN=Ahnak PE=1 SV=1	0.984354	17.9925	1.43e-05	91.457	78.476	91.457					0.984354	17.9925	1.43e-05	91.457		1	S	TDVETQPGKTVIRLPSGSGPASPTTGSAVDI	0	0	0	0	0	0	0	0
E9Q616	217	E9Q616	E9Q616		Ahnak	tr|E9Q616|E9Q616_MOUSE AHNAK nucleoprotein (desmoyokin) OS=Mus musculus OX=10090 GN=Ahnak PE=1 SV=1	0.918387	14.6533	1.97e-05	87.287	56.849	87.287	0.86659	8.95732	0.000249972	62.924	0.918387	14.6533	1.97e-05	87.287		1	S	PGKTVIRLPSGSGPASPTTGSAVDIRAGAIS	295.92	544.35	411.33	474.86	311.09	378.77	393.84	641.04
E9Q616	5553	E9Q616	E9Q616		Ahnak	tr|E9Q616|E9Q616_MOUSE AHNAK nucleoprotein (desmoyokin) OS=Mus musculus OX=10090 GN=Ahnak PE=1 SV=1	0.38344	0.4582	0.000228969	46.54	39.552	46.54	0.38344	0.4582	0.000228969	46.54							S	KGKFSLFKSKKPRHRSNSFSDEREFSAPSTP	0	0	0	0	0	0	0	0
E9Q616	5555	E9Q616	E9Q616		Ahnak	tr|E9Q616|E9Q616_MOUSE AHNAK nucleoprotein (desmoyokin) OS=Mus musculus OX=10090 GN=Ahnak PE=1 SV=1	0.359459	1.59568	0.000193169	47.191	39.004	47.191					0.359459	1.59568	0.000193169	47.191			S	KFSLFKSKKPRHRSNSFSDEREFSAPSTPTG	0	0	0	0	0	0	0	0
E9Q6B2	247	E9Q6B2	E9Q6B2	Coiled-coil domain-containing protein 85C	Ccdc85c	sp|E9Q6B2|CC85C_MOUSE Coiled-coil domain-containing protein 85C OS=Mus musculus OX=10090 GN=Ccdc85c PE=1 SV=1	0.999908	40.3734	2.31e-09	116.98	92.45	74.76	0.999842	38.0169	2.31e-09	116.98	0.999908	40.3734	0.00114612	74.76		1	S	GPHKVPDGKAGATRRSLDDLSAPPHHRSIPN	163.69	231.19	390.29	398.13	128.78	209.31	217.69	185.53
E9Q6B2	179	E9Q6B2	E9Q6B2	Coiled-coil domain-containing protein 85C	Ccdc85c	sp|E9Q6B2|CC85C_MOUSE Coiled-coil domain-containing protein 85C OS=Mus musculus OX=10090 GN=Ccdc85c PE=1 SV=1	0.5	0	1.18e-33	165.1	140.32	165.1					0.5	0	1.18e-33	165.1		1	S	AAGGAGGGGGGAGSRSSIDSQASLSGPLAGS	0	0	0	0	0	0	0	0
E9Q6B2	180	E9Q6B2	E9Q6B2	Coiled-coil domain-containing protein 85C	Ccdc85c	sp|E9Q6B2|CC85C_MOUSE Coiled-coil domain-containing protein 85C OS=Mus musculus OX=10090 GN=Ccdc85c PE=1 SV=1	0.5	0	1.18e-33	165.1	140.32	165.1					0.5	0	1.18e-33	165.1		1	S	AGGAGGGGGGAGSRSSIDSQASLSGPLAGSA	0	0	0	0	0	0	0	0
E9Q6H8	56	E9Q6H8	E9Q6H8		Plekha5	tr|E9Q6H8|E9Q6H8_MOUSE Pleckstrin homology domain containing
E9Q6H8	998	E9Q6H8	E9Q6H8		Plekha5	tr|E9Q6H8|E9Q6H8_MOUSE Pleckstrin homology domain containing
E9Q6H8	574	E9Q6H8	E9Q6H8		Plekha5	tr|E9Q6H8|E9Q6H8_MOUSE Pleckstrin homology domain containing
E9Q6H8	1245	E9Q6H8	E9Q6H8		Plekha5	tr|E9Q6H8|E9Q6H8_MOUSE Pleckstrin homology domain containing
E9Q6H8	1020	E9Q6H8	E9Q6H8		Plekha5	tr|E9Q6H8|E9Q6H8_MOUSE Pleckstrin homology domain containing
E9Q6J5	3002	E9Q6J5	E9Q6J5		Bod1l	sp|E9Q6J5|BD1L1_MOUSE Biorientation of chromosomes in cell division protein 1-like 1 OS=Mus musculus OX=10090 GN=Bod1l PE=1 SV=1	0.506136	0.106591	0.0144465	58.699	31.37	58.699					0.506136	0.106591	0.0144465	58.699		1	S	SKSPPLGRSKAQLSPSVKRKREVSPPGARTR	0	0	0	0	0	0	0	0
E9Q6J5	240	E9Q6J5	E9Q6J5		Bod1l	sp|E9Q6J5|BD1L1_MOUSE Biorientation of chromosomes in cell division protein 1-like 1 OS=Mus musculus OX=10090 GN=Bod1l PE=1 SV=1	0.957905	13.9617	8.05e-28	169.4	119.95	169.4	0.928478	11.5143	0.000334368	88.706	0.957905	13.9617	8.05e-28	169.4		1	S	AKVSERTSRKLSSQPSTDVSTDKERGSEDAT	2375.9	3237.1	488.54	2232.3	1565.7	2711.4	1456.3	2992.1
E9Q6J5	634	E9Q6J5	E9Q6J5		Bod1l	sp|E9Q6J5|BD1L1_MOUSE Biorientation of chromosomes in cell division protein 1-like 1 OS=Mus musculus OX=10090 GN=Bod1l PE=1 SV=1	0.557677	1.15094	0.00146362	58.671	39.94	58.671	0.557677	1.15094	0.00146362	58.671						1	S	HGKGEPSRPARRLSESLHSADENKTESKVER	873.23	1374.3	201.52	1063.8	581.52	971.91	750.03	858.26
E9Q6J5	656	E9Q6J5	E9Q6J5		Bod1l	sp|E9Q6J5|BD1L1_MOUSE Biorientation of chromosomes in cell division protein 1-like 1 OS=Mus musculus OX=10090 GN=Bod1l PE=1 SV=1	0.470651	0	4.07e-10	121.92	107.76	121.92	0.470651	0	4.07e-10	121.92	0.333719	0	1.25e-05	95.153			S	NKTESKVEREYKRRTSTPVILEGAQEETDTR	0	0	0	0	0	0	0	0
E9Q6J5	2840	E9Q6J5	E9Q6J5		Bod1l	sp|E9Q6J5|BD1L1_MOUSE Biorientation of chromosomes in cell division protein 1-like 1 OS=Mus musculus OX=10090 GN=Bod1l PE=1 SV=1	0.47439	0	0.000451722	79.693	64.427	79.693					0.47439	0	0.000451722	79.693			S	KEDSKTETDITTVEQSSPSGKLKVSQADESN	0	0	0	0	0	0	0	0
E9Q6J5	2841	E9Q6J5	E9Q6J5		Bod1l	sp|E9Q6J5|BD1L1_MOUSE Biorientation of chromosomes in cell division protein 1-like 1 OS=Mus musculus OX=10090 GN=Bod1l PE=1 SV=1	0.834422	7.7578	0.000451722	79.693	64.427	76.588	0.834422	7.7578	0.000505636	76.588	0.47439	0	0.000451722	79.693		1	S	EDSKTETDITTVEQSSPSGKLKVSQADESNK	625.58	500.66	257.11	512.3	407.41	526.05	313.28	593.95
E9Q6P5	630	E9Q6P5	E9Q6P5		Ttc7b	sp|E9Q6P5|TTC7B_MOUSE Tetratricopeptide repeat protein 7B OS=Mus musculus OX=10090 GN=Ttc7b PE=1 SV=1	0.975847	16.0642	3.24e-05	130.56	43.239	130.56	0.90359	9.71851	0.00113746	103.83	0.975847	16.0642	3.24e-05	130.56		1	S	SCYNLTNPSDSGRGSSLLDRTIADRRQLNTI	2246.6	4216.1	1591.9	2434.8	1704.8	2263.7	1388.8	2487.3
E9Q6P5	159	E9Q6P5	E9Q6P5		Ttc7b	sp|E9Q6P5|TTC7B_MOUSE Tetratricopeptide repeat protein 7B OS=Mus musculus OX=10090 GN=Ttc7b PE=1 SV=1	0.333085	0	0.00217956	50.608	33.53	50.608	0.333085	0	0.00217956	50.608							S	AYATKGLCLEKLPVSSSTSNLHVDREQDVIT	0	0	0	0	0	0	0	0
E9Q6P5	160	E9Q6P5	E9Q6P5		Ttc7b	sp|E9Q6P5|TTC7B_MOUSE Tetratricopeptide repeat protein 7B OS=Mus musculus OX=10090 GN=Ttc7b PE=1 SV=1	0.998623	30.7599	2.25e-50	201.16	181.26	179.9	0.998623	30.7599	1.08e-33	179.9	0.989776	20.7435	2.25e-50	201.16		1	S	YATKGLCLEKLPVSSSTSNLHVDREQDVITC	2829.7	16109	3640.4	6556.6	10516	8908.3	5586.3	8730.3
E9Q6P5	162	E9Q6P5	E9Q6P5		Ttc7b	sp|E9Q6P5|TTC7B_MOUSE Tetratricopeptide repeat protein 7B OS=Mus musculus OX=10090 GN=Ttc7b PE=1 SV=1	0.248769	0	5.66e-06	63.491	42.093	63.491					0.248769	0	5.66e-06	63.491			S	TKGLCLEKLPVSSSTSNLHVDREQDVITCYE	0	0	0	0	0	0	0	0
E9Q6P5	651	E9Q6P5	E9Q6P5		Ttc7b	sp|E9Q6P5|TTC7B_MOUSE Tetratricopeptide repeat protein 7B OS=Mus musculus OX=10090 GN=Ttc7b PE=1 SV=1	0.988242	20.3857	7.68e-10	82.486	69.545	82.486					0.988242	20.3857	7.68e-10	82.486		1	S	IADRRQLNTITLPDFSDPETGSVHATSVAAS	0	0	0	0	0	0	0	0
E9Q6P5	657	E9Q6P5	E9Q6P5		Ttc7b	sp|E9Q6P5|TTC7B_MOUSE Tetratricopeptide repeat protein 7B OS=Mus musculus OX=10090 GN=Ttc7b PE=1 SV=1	0.330655	0	0.000329421	45.546	31.919	45.546					0.330655	0	0.000329421	45.546			S	LNTITLPDFSDPETGSVHATSVAASRVEQAL	0	0	0	0	0	0	0	0
E9Q6P5	677	E9Q6P5	E9Q6P5		Ttc7b	sp|E9Q6P5|TTC7B_MOUSE Tetratricopeptide repeat protein 7B OS=Mus musculus OX=10090 GN=Ttc7b PE=1 SV=1	0.486184	0	4.23e-05	80.638	70.442	80.469	0.458012	0	0.000151381	63.918	0.486184	0	4.23e-05	80.638			S	SVAASRVEQALSEVASSLQSSAPKQGPLHPW	0	0	0	0	0	0	0	0
E9Q6P5	678	E9Q6P5	E9Q6P5		Ttc7b	sp|E9Q6P5|TTC7B_MOUSE Tetratricopeptide repeat protein 7B OS=Mus musculus OX=10090 GN=Ttc7b PE=1 SV=1	0.486184	0	4.23e-05	80.638	70.442	80.469	0.458012	0	0.000151381	63.918	0.486184	0	4.23e-05	80.638			S	VAASRVEQALSEVASSLQSSAPKQGPLHPWM	0	0	0	0	0	0	0	0
E9Q6R7	933	E9Q6R7	E9Q6R7		Utrn	tr|E9Q6R7|E9Q6R7_MOUSE Utrophin OS=Mus musculus OX=10090 GN=Utrn PE=1 SV=1	1	68.3607	1.73e-05	68.361	49.996	68.361	1	68.3607	1.73e-05	68.361						1	S	TLKKMLSESEKAAQASLNALNDPIAVEQALQ	0	219.74	0	171.49	0	0	97.306	0
E9Q6Y8	48	E9Q6Y8	E9Q6Y8	Ubiquitin carboxyl-terminal hydrolase	Usp31	tr|E9Q6Y8|E9Q6Y8_MOUSE ubiquitinyl hydrolase 1 OS=Mus musculus OX=10090 GN=Usp31 PE=1 SV=1	0.449578	0	1.31e-05	76.655	63.675	76.655	0.449578	0	1.31e-05	76.655							S	AGGGGGAGGPGPAAPSSPSSARSVGSFMSRV	0	0	0	0	0	0	0	0
E9Q6Y8	49	E9Q6Y8	E9Q6Y8	Ubiquitin carboxyl-terminal hydrolase	Usp31	tr|E9Q6Y8|E9Q6Y8_MOUSE ubiquitinyl hydrolase 1 OS=Mus musculus OX=10090 GN=Usp31 PE=1 SV=1	0.449578	0	1.31e-05	76.655	63.675	76.655	0.449578	0	1.31e-05	76.655							S	GGGGGAGGPGPAAPSSPSSARSVGSFMSRVL	0	0	0	0	0	0	0	0
E9Q777	987	E9Q777	E9Q777		Akap11	tr|E9Q777|E9Q777_MOUSE A kinase (PRKA) anchor protein 11 OS=Mus musculus OX=10090 GN=Akap11 PE=1 SV=2	0.995679	23.625	0.00454406	62.408	47.435	62.408					0.995679	23.625	0.00454406	62.408		1	S	MTLGETPKFLDFSDNSPHRSLLVGNYCVAEC	0	0	0	0	0	0	0	0
E9Q777	21	E9Q777	E9Q777		Akap11	tr|E9Q777|E9Q777_MOUSE A kinase (PRKA) anchor protein 11 OS=Mus musculus OX=10090 GN=Akap11 PE=1 SV=2	0.96962	15.0402	0.0393394	46.462	32.255	46.462					0.96962	15.0402	0.0393394	46.462		1	S	PLRSSHLKSKASVRKSFSEDVFRSVKSLLQS	0	0	0	0	0	0	0	0
E9Q777	244	E9Q777	E9Q777		Akap11	tr|E9Q777|E9Q777_MOUSE A kinase (PRKA) anchor protein 11 OS=Mus musculus OX=10090 GN=Akap11 PE=1 SV=2	0.998934	29.7166	8.46e-05	127.76	97.201	127.76	0.9911	20.4674	0.000380992	93.111	0.998934	29.7166	8.46e-05	127.76		1	S	HHLESHDLKVLVSYGSPKSLAKPSPSVNVLG	1243.3	1149.3	803.09	876.17	423.35	798.48	707.25	674.64
E9Q784	242	E9Q784	E9Q784		Zc3h13	sp|E9Q784|ZC3HD_MOUSE Zinc finger CCCH domain-containing protein 13 OS=Mus musculus OX=10090 GN=Zc3h13 PE=1 SV=1	1	49.7151	1.23e-14	134.56	87.682	49.715	1	49.7151	0.00721158	49.715	1	134.562	1.23e-14	134.56		1	S	ASSAGKKERKAAVVASPLLDQQRNSKGNQSK	521.4	574.69	99.087	517.42	295.86	255.98	345.97	315.75
E9Q784	198	E9Q784	E9Q784		Zc3h13	sp|E9Q784|ZC3HD_MOUSE Zinc finger CCCH domain-containing protein 13 OS=Mus musculus OX=10090 GN=Zc3h13 PE=1 SV=1	1	100.569	0.000476312	112.11	63.684	100.57	1	100.569	0.000476312	100.57	1	112.107	0.000642238	112.11		1	S	ENMDKREEIIIQKEVSPEVVRSKLSPSPSLR	2768.5	4162.2	1712.6	2823	2032	2553.5	2125.1	3543.6
E9Q784	1069	E9Q784	E9Q784		Zc3h13	sp|E9Q784|ZC3HD_MOUSE Zinc finger CCCH domain-containing protein 13 OS=Mus musculus OX=10090 GN=Zc3h13 PE=1 SV=1	0.998488	28.2089	0.000200668	78.012	62.757	76.262					0.998488	28.2089	0.000200668	78.012		1	S	VERGNLETHEDSQVFSPKKGQKKKNIEKKRK	0	0	0	0	0	0	0	0
E9Q784	953	E9Q784	E9Q784		Zc3h13	sp|E9Q784|ZC3HD_MOUSE Zinc finger CCCH domain-containing protein 13 OS=Mus musculus OX=10090 GN=Zc3h13 PE=1 SV=1	0.941332	14.6871	1.31e-10	142.97	110.02	96.756	0.934744	14.5442	9.2e-09	110.08	0.941332	14.6871	1.31e-10	142.97		1	S	RLLSQVVRPQESRSLSPSHLTEDRQGRWKEE	366.41	608.62	466.89	484.49	479.76	419.13	346.61	654.89
E9Q784	955	E9Q784	E9Q784		Zc3h13	sp|E9Q784|ZC3HD_MOUSE Zinc finger CCCH domain-containing protein 13 OS=Mus musculus OX=10090 GN=Zc3h13 PE=1 SV=1	0.365734	0	9.2e-09	110.08	77.237	110.08	0.365734	0	9.2e-09	110.08							S	LSQVVRPQESRSLSPSHLTEDRQGRWKEEDR	0	0	0	0	0	0	0	0
E9Q7G0	398	E9Q7G0	E9Q7G0		Numa1	sp|E9Q7G0|NUMA1_MOUSE Nuclear mitotic apparatus protein 1 OS=Mus musculus OX=10090 GN=Numa1 PE=1 SV=1	1	91.9612	0.00011019	125.97	93.447	91.961	1	91.9612	0.000463858	91.961	1	125.97	0.00011019	125.97		1	S	GKLSQLEDQATRLQESPAPEKGEVLGDALQL	2271.1	5537.8	517.99	2947.7	2423.6	2605.9	2650.2	2795.8
E9Q7G0	1739	E9Q7G0	E9Q7G0		Numa1	sp|E9Q7G0|NUMA1_MOUSE Nuclear mitotic apparatus protein 1 OS=Mus musculus OX=10090 GN=Numa1 PE=1 SV=1	0.999999	62.9495	3.58e-224	306.11	273.49	306.11	0.999997	55.6184	9.62e-176	285.1	0.999999	62.9495	3.58e-224	306.11		1	S	PRTQPDGTSVPGEPASPISQRLPPKVESLES	2191.3	4519.5	2407.1	2493.8	2467.3	3600.1	2150.3	2615.4
E9Q7G0	167	E9Q7G0	E9Q7G0		Numa1	sp|E9Q7G0|NUMA1_MOUSE Nuclear mitotic apparatus protein 1 OS=Mus musculus OX=10090 GN=Numa1 PE=1 SV=1	0.588183	5.78483	5.56e-05	65.213	47.413	65.213					0.588183	5.78483	5.56e-05	65.213		1	S	EKVPYTHASTLSEELSPPSHQTKRKIRFLEI	0	0	0	0	0	0	0	0
E9Q7P2	958	E9Q7P2	E9Q7P2		Cacna1i	tr|E9Q7P2|E9Q7P2_MOUSE Voltage-dependent T-type calcium channel subunit alpha OS=Mus musculus OX=10090 GN=Cacna1i PE=1 SV=1	0.998693	28.8397	0.000425376	67.727	49.645	67.727	0.998693	28.8397	0.000425376	67.727						1	S	ASRRSSWNSLKHKPPSAEHESLLSGERGGSC	660.81	972.15	744.06	1035.8	371.44	481.19	299.4	921
E9Q7P2	947	E9Q7P2	E9Q7P2		Cacna1i	tr|E9Q7P2|E9Q7P2_MOUSE Voltage-dependent T-type calcium channel subunit alpha OS=Mus musculus OX=10090 GN=Cacna1i PE=1 SV=1	0.498661	0	0.0278609	40.432	11.689	40.432					0.498661	0	0.0278609	40.432			S	YYGPWGRSGTWASRRSSWNSLKHKPPSAEHE	0	0	0	0	0	0	0	0
E9Q7P2	948	E9Q7P2	E9Q7P2		Cacna1i	tr|E9Q7P2|E9Q7P2_MOUSE Voltage-dependent T-type calcium channel subunit alpha OS=Mus musculus OX=10090 GN=Cacna1i PE=1 SV=1	0.983689	18.4198	0.0278609	63.283	26.59	63.283					0.983689	18.4198	0.0278609	63.283		1	S	YGPWGRSGTWASRRSSWNSLKHKPPSAEHES	0	0	0	0	0	0	0	0
E9Q7P2	2155	E9Q7P2	E9Q7P2		Cacna1i	tr|E9Q7P2|E9Q7P2_MOUSE Voltage-dependent T-type calcium channel subunit alpha OS=Mus musculus OX=10090 GN=Cacna1i PE=1 SV=1	0.883559	8.80129	0.0326934	48.423	24.393	48.423					0.883559	8.80129	0.0326934	48.423		1	S	PGRPGATVSVRGLARSPSWAADRSKDPPGQA	0	0	0	0	0	0	0	0
E9Q7P2	2157	E9Q7P2	E9Q7P2		Cacna1i	tr|E9Q7P2|E9Q7P2_MOUSE Voltage-dependent T-type calcium channel subunit alpha OS=Mus musculus OX=10090 GN=Cacna1i PE=1 SV=1	0.806748	6.20614	0.00269834	83.869	48.6	83.869	0.806748	6.20614	0.00269834	83.869						1	S	RPGATVSVRGLARSPSWAADRSKDPPGQAQL	341.79	2137.7	702.3	1685.4	492.3	3013.2	626.38	1436.2
E9Q7P2	1017	E9Q7P2	E9Q7P2		Cacna1i	tr|E9Q7P2|E9Q7P2_MOUSE Voltage-dependent T-type calcium channel subunit alpha OS=Mus musculus OX=10090 GN=Cacna1i PE=1 SV=1	0.863683	8.51255	0.0616179	43.808	8.5125	43.808	0.863683	8.51255	0.0616179	43.808						1	S	GPHLAHRHRHHRRTLSLDTRDSVDLAELVPV	445.63	1805.1	507.82	448.54	1138.9	1187.5	415.29	946.23
E9Q8I9	2815	E9Q8I9	E9Q8I9	Protein furry homolog	Fry	sp|E9Q8I9|FRY_MOUSE Protein furry homolog OS=Mus musculus OX=10090 GN=Fry PE=1 SV=1	0.987768	19.127	3.31e-09	100.42	82.502	100.42	0.499571	0	3.17e-05	61.801	0.987768	19.127	3.31e-09	100.42		1	S	TLSWLANCKATFAGGSRDGVITCQPGDSEEK	0	0	0	0	0	0	0	0
E9Q8I9	2459	E9Q8I9	E9Q8I9	Protein furry homolog	Fry	sp|E9Q8I9|FRY_MOUSE Protein furry homolog OS=Mus musculus OX=10090 GN=Fry PE=1 SV=1	0.985707	18.3861	0.000482238	87.647	65.654	87.647	0.985707	18.3861	0.000482238	87.647						1	S	SEDGPREQENMDDTNSEQQFRVFRDFDFLDV	897.89	2858	1184.8	1057.2	2215.2	1887.2	903.43	1007
E9Q8I9	1936	E9Q8I9	E9Q8I9	Protein furry homolog	Fry	sp|E9Q8I9|FRY_MOUSE Protein furry homolog OS=Mus musculus OX=10090 GN=Fry PE=1 SV=1	0.999995	52.8326	1.66e-05	98.902	58.187	98.902	0.999995	52.8326	1.66e-05	98.902	0.999905	40.2382	0.00158459	76.522		1	S	NLSDCLKNSDLFTVLSRSSSPDLSSSSKLTA	1472.7	3319.5	1243.2	1653.8	1915.8	1499.9	1429.5	2016.3
E9Q8I9	1822	E9Q8I9	E9Q8I9	Protein furry homolog	Fry	sp|E9Q8I9|FRY_MOUSE Protein furry homolog OS=Mus musculus OX=10090 GN=Fry PE=1 SV=1	0.999093	30.4188	0.00824249	57.708	19.762	57.708					0.999093	30.4188	0.00824249	57.708		1	S	LWCHEDITPKNQNSKSAEQLSNFLRHVVSVF	0	0	0	0	0	0	0	0
E9Q8I9	2373	E9Q8I9	E9Q8I9	Protein furry homolog	Fry	sp|E9Q8I9|FRY_MOUSE Protein furry homolog OS=Mus musculus OX=10090 GN=Fry PE=1 SV=1	0.394242	0	0.000170756	64.507	37.909	41.412	0.394242	0	0.00423511	41.412	0.354603	0	0.000170756	64.507			S	SSGRDGKPRAMAVTRSASSTSSGSNSNVLVP	0	0	0	0	0	0	0	0
E9Q8I9	2375	E9Q8I9	E9Q8I9	Protein furry homolog	Fry	sp|E9Q8I9|FRY_MOUSE Protein furry homolog OS=Mus musculus OX=10090 GN=Fry PE=1 SV=1	0.394242	0	0.000170756	64.507	37.909	41.412	0.394242	0	0.00423511	41.412	0.354603	0	0.000170756	64.507			S	GRDGKPRAMAVTRSASSTSSGSNSNVLVPVS	0	0	0	0	0	0	0	0
E9Q8I9	1940	E9Q8I9	E9Q8I9	Protein furry homolog	Fry	sp|E9Q8I9|FRY_MOUSE Protein furry homolog OS=Mus musculus OX=10090 GN=Fry PE=1 SV=1	0.998577	29.3753	4.88e-13	148.28	89.91	148.28	0.998577	29.3753	4.88e-13	148.28	0.899249	12.8506	0.00422351	63.864		1	S	CLKNSDLFTVLSRSSSPDLSSSSKLTASRKS	2510.1	3216.3	1135.1	2166	2967.2	1718	2983.8	2800.7
E9Q8I9	1955	E9Q8I9	E9Q8I9	Protein furry homolog	Fry	sp|E9Q8I9|FRY_MOUSE Protein furry homolog OS=Mus musculus OX=10090 GN=Fry PE=1 SV=1	0.5	0	2.63e-22	113.32	102.48	113.32	0.5	0	2.63e-22	113.32						1	S	SPDLSSSSKLTASRKSTGQLNVNPGTPGSGG	189.85	204.6	0	150.29	226.03	139.41	145.26	0
E9Q8V6	1225	E9Q8V6	E9Q8V6		Dennd4a	tr|E9Q8V6|E9Q8V6_MOUSE DENN/MADD domain containing 4A OS=Mus musculus OX=10090 GN=Dennd4a PE=1 SV=1	0.830695	6.90771	0.00229115	86.882	50.5	86.882					0.830695	6.90771	0.00229115	86.882		1	S	MYMNNMSSPLTSRTPSIDLQRACDDKLTNKK	0	0	0	0	0	0	0	0
E9Q912	597	E9Q912	E9Q912		Rap1gds1	sp|E9Q912|GDS1_MOUSE Rap1 GTPase-GDP dissociation stimulator 1 OS=Mus musculus OX=10090 GN=Rap1gds1 PE=2 SV=1	0.882401	8.75262	3.05e-19	166.86	130.57	166.86	0.882401	8.75262	3.05e-19	166.86						1	S	SKLRSHENKSVAQQASLTEQRLTVES_____	3321.7	5604.8	3412	3843.8	2513.7	5168.3	2413.5	2949.7
E9Q942	59	E9Q942	E9Q942	Small integral membrane protein 13	Smim13	sp|E9Q942|SIM13_MOUSE Small integral membrane protein 13 OS=Mus musculus OX=10090 GN=Smim13 PE=1 SV=1	0.373419	0	3.97e-32	139.19	127.98	139.19	0.373419	0	3.97e-32	139.19							S	LVGDTGSQEGDNEQPSGSETEEDPSASPQKI	0	0	0	0	0	0	0	0
E9Q942	70	E9Q942	E9Q942	Small integral membrane protein 13	Smim13	sp|E9Q942|SIM13_MOUSE Small integral membrane protein 13 OS=Mus musculus OX=10090 GN=Smim13 PE=1 SV=1	0.723041	4.19694	1.1e-22	114.03	101.08	114.03	0.723041	4.19694	1.1e-22	114.03						1	S	NEQPSGSETEEDPSASPQKIRSARQRRPPVD	487.4	1220.5	364.36	529.44	1028.2	745.68	922.28	814.99
E9Q9B7	918	E9Q9B7	E9Q9B7		Kidins220	tr|E9Q9B7|E9Q9B7_MOUSE Kinase D-interacting substrate 220 OS=Mus musculus OX=10090 GN=Kidins220 PE=1 SV=1	0.999815	37.3245	0.000949366	94.692	51.18	78.488	0.999225	31.1021	0.000949366	94.692	0.999815	37.3245	0.00361963	78.488		1	S	TYRRRQMQRTITRQMSFDLTKLLVTEDWFSD	6098.1	7949.6	6478.1	8681.7	4446	9014.4	3563.2	6890.8
E9Q9B7	1621	E9Q9B7	E9Q9B7		Kidins220	tr|E9Q9B7|E9Q9B7_MOUSE Kinase D-interacting substrate 220 OS=Mus musculus OX=10090 GN=Kidins220 PE=1 SV=1	0.632157	5.71392	2.62e-09	102.6	78.801	102.6					0.632157	5.71392	2.62e-09	102.6		1	S	SSDSGVRSNESSPNHSLHNEAADDSQLEKAN	0	0	0	0	0	0	0	0
E9Q9B7	1578	E9Q9B7	E9Q9B7		Kidins220	tr|E9Q9B7|E9Q9B7_MOUSE Kinase D-interacting substrate 220 OS=Mus musculus OX=10090 GN=Kidins220 PE=1 SV=1	0.999993	51.6604	8.27e-06	122.69	95.904	122.69	0.999993	51.6604	8.29e-06	122.69	0.999923	41.1377	8.27e-06	119.27		1	S	DKDKKAEGKAERVAKSPEHSVEPIRTFIKAK	1275.8	1614.1	317.81	1336.3	836.06	1176.3	1157.2	820.96
E9Q9B7	1433	E9Q9B7	E9Q9B7		Kidins220	tr|E9Q9B7|E9Q9B7_MOUSE Kinase D-interacting substrate 220 OS=Mus musculus OX=10090 GN=Kidins220 PE=1 SV=1	0.495641	0	1.54e-25	142.59	126.69	142.59	0.404294	0	0.000803654	40.428	0.495641	0	1.54e-25	142.59			S	SQLEGGTGSSTISGRSSPHSTYYIGQSSSGG	0	0	0	0	0	0	0	0
E9Q9B7	1434	E9Q9B7	E9Q9B7		Kidins220	tr|E9Q9B7|E9Q9B7_MOUSE Kinase D-interacting substrate 220 OS=Mus musculus OX=10090 GN=Kidins220 PE=1 SV=1	0.495641	0	1.54e-25	142.59	126.69	142.59	0.404294	0	0.000803654	40.428	0.495641	0	1.54e-25	142.59			S	QLEGGTGSSTISGRSSPHSTYYIGQSSSGGS	0	0	0	0	0	0	0	0
E9Q9B7	1437	E9Q9B7	E9Q9B7		Kidins220	tr|E9Q9B7|E9Q9B7_MOUSE Kinase D-interacting substrate 220 OS=Mus musculus OX=10090 GN=Kidins220 PE=1 SV=1	0.248794	0	0.000675154	41.423	37.395	41.423					0.248794	0	0.000675154	41.423			S	GGTGSSTISGRSSPHSTYYIGQSSSGGSIHS	0	0	0	0	0	0	0	0
E9Q9B7	885	E9Q9B7	E9Q9B7		Kidins220	tr|E9Q9B7|E9Q9B7_MOUSE Kinase D-interacting substrate 220 OS=Mus musculus OX=10090 GN=Kidins220 PE=1 SV=1	0.99002	20.0263	0.00180901	75.479	57.318	75.479					0.99002	20.0263	0.00180901	75.479		1	S	ATGVQEDADRRVSQNSLGEMTKLGSKTALNR	0	0	0	0	0	0	0	0
E9Q9K8	1070	E9Q9K8	E9Q9K8		Akap6	tr|E9Q9K8|E9Q9K8_MOUSE A kinase (PRKA) anchor protein 6 OS=Mus musculus OX=10090 GN=Akap6 PE=1 SV=1	0.997533	26.6718	2.8e-06	106.49	60.613	106.49	0.99696	28.1678	0.00110577	74.76	0.997533	26.6718	2.8e-06	106.49		1	S	DTMAGHSGSGPRDLLSPESGSLVRQLEVRIK	849.66	1007.1	653.29	650.82	639.34	657.36	350.4	556.52
E9Q9K8	2249	E9Q9K8	E9Q9K8		Akap6	tr|E9Q9K8|E9Q9K8_MOUSE A kinase (PRKA) anchor protein 6 OS=Mus musculus OX=10090 GN=Akap6 PE=1 SV=1	0.734824	7.43708	0.00113961	51.819	37.51	51.819					0.734824	7.43708	0.00113961	51.819		1	S	TPPGKAKREGSSRKQSVSGTPEENAASAKPK	0	0	0	0	0	0	0	0
E9Q9K8	533	E9Q9K8	E9Q9K8		Akap6	tr|E9Q9K8|E9Q9K8_MOUSE A kinase (PRKA) anchor protein 6 OS=Mus musculus OX=10090 GN=Akap6 PE=1 SV=1	0.974325	16.6449	0.00187292	60.157	34.219	60.157					0.974325	16.6449	0.00187292	60.157		1	S	KQSENTRSSVVPTMVSPGAPKATARPATDSA	0	0	0	0	0	0	0	0
E9Q9K8	423	E9Q9K8	E9Q9K8		Akap6	tr|E9Q9K8|E9Q9K8_MOUSE A kinase (PRKA) anchor protein 6 OS=Mus musculus OX=10090 GN=Akap6 PE=1 SV=1	0.957744	13.9994	0.00351557	67.08	41.863	67.08					0.957744	13.9994	0.00351557	67.08		1	S	DGKGRVVDLKPELSRSTPSLVEPPDRSKLCL	0	0	0	0	0	0	0	0
E9Q9K8	1651	E9Q9K8	E9Q9K8		Akap6	tr|E9Q9K8|E9Q9K8_MOUSE A kinase (PRKA) anchor protein 6 OS=Mus musculus OX=10090 GN=Akap6 PE=1 SV=1	0.988713	19.7184	3.9e-05	100.19	74.97	100.19					0.988713	19.7184	3.9e-05	100.19		1	S	ENIQSPSEQKIKRSVSDITLQSSSQKMSFSG	0	0	0	0	0	0	0	0
E9Q9Q2	1007	E9Q9Q2	E9Q9Q2		R3hdm1	tr|E9Q9Q2|E9Q9Q2_MOUSE R3H domain containing 1 OS=Mus musculus OX=10090 GN=R3hdm1 PE=1 SV=1	0.969765	15.0616	4.57e-15	135.02	115.45	135.02	0.969765	15.0616	4.57e-15	135.02	0.5	0	0.000305449	67.995		1	S	SRHGNRGRRQAKKAASTDLGAGEAVVGKVLE	2432	2323.4	1013.8	2965.3	2484.7	3520.4	2191.3	2161.4
E9Q9Q2	381	E9Q9Q2	E9Q9Q2		R3hdm1	tr|E9Q9Q2|E9Q9Q2_MOUSE R3H domain containing 1 OS=Mus musculus OX=10090 GN=R3hdm1 PE=1 SV=1	0.974366	16.1903	0.000270664	89.403	70.658	60.49					0.974366	16.1903	0.000270664	89.403		1	S	DSSLRNLKPAVTKASSFSGISVLTRGDSSGS	0	0	0	0	0	0	0	0
E9Q9Q2	111	E9Q9Q2	E9Q9Q2		R3hdm1	tr|E9Q9Q2|E9Q9Q2_MOUSE R3H domain containing 1 OS=Mus musculus OX=10090 GN=R3hdm1 PE=1 SV=1	0.896844	9.39221	0.00329782	68.069	48.23	68.069					0.896844	9.39221	0.00329782	68.069		1	S	ISQETQEKIQIQLTQSFEKEEKPSKDETDKE	0	0	0	0	0	0	0	0
E9Q9Q2;Q80TM6;Q9DCB4	282;283;278	E9Q9Q2;Q80TM6;Q9DCB4	Q9DCB4	R3H domain-containing protein 2;cAMP-regulated phosphoprotein 21	R3hdm1;R3hdm2;Arpp21	tr|E9Q9Q2|E9Q9Q2_MOUSE R3H domain containing 1 OS=Mus musculus OX=10090 GN=R3hdm1 PE=1 SV=1;sp|Q80TM6|R3HD2_MOUSE R3H domain-containing protein 2 OS=Mus musculus OX=10090 GN=R3hdm2 PE=1 SV=2;sp|Q9DCB4|ARP21_MOUSE cAMP-regulated phosphoprotein 21 OS=Mus mus	1	174.903	3.16e-50	174.9	146.28	174.9	1	174.903	3.16e-50	174.9	1	71.9334	8.19e-38	174.52		1	S	DNQMRVPLQDGRRSKSIEEREEEYQRVRERI;DSQMRIRLKDDRRSKSIEEREEEYQRARDRI;NQNRMHPFRDDRRSKSIEEREEEYQRVRERI	10601	17747	12505	16409	6340.4	14910	6410	8421.4
E9Q9Q2;Q80TM6;Q9DCB4	280;281;276	E9Q9Q2;Q80TM6;Q9DCB4	Q9DCB4	R3H domain-containing protein 2;cAMP-regulated phosphoprotein 21	R3hdm1;R3hdm2;Arpp21	tr|E9Q9Q2|E9Q9Q2_MOUSE R3H domain containing 1 OS=Mus musculus OX=10090 GN=R3hdm1 PE=1 SV=1;sp|Q80TM6|R3HD2_MOUSE R3H domain-containing protein 2 OS=Mus musculus OX=10090 GN=R3hdm2 PE=1 SV=2;sp|Q9DCB4|ARP21_MOUSE cAMP-regulated phosphoprotein 21 OS=Mus mus	0.5	0	0.000170812	92.264	75.243	92.264					0.5	0	0.000170812	92.264		1	S	EDNQNRMHPFRDDRRSKSIEEREEEYQRVRE;KDDSQMRIRLKDDRRSKSIEEREEEYQRARD;RDDNQMRVPLQDGRRSKSIEEREEEYQRVRE	0	0	0	0	0	0	0	0
E9Q9Q2	881	E9Q9Q2	E9Q9Q2		R3hdm1	tr|E9Q9Q2|E9Q9Q2_MOUSE R3H domain containing 1 OS=Mus musculus OX=10090 GN=R3hdm1 PE=1 SV=1	0.990639	20.2461	0.0176696	56.432	39.489	56.432					0.990639	20.2461	0.0176696	56.432		1	S	MMQLNLPNNPQSRTHSPPQWKQNKHYCDHQR	0	0	0	0	0	0	0	0
E9Q9Q2	361	E9Q9Q2	E9Q9Q2		R3hdm1	tr|E9Q9Q2|E9Q9Q2_MOUSE R3H domain containing 1 OS=Mus musculus OX=10090 GN=R3hdm1 PE=1 SV=1	0.570258	1.71331	5.13e-06	112.5	95.064	73.448					0.570258	1.71331	5.13e-06	112.5		1	S	SSTENELKYSEPRPWSSTDSDSSLRNLKPAV	0	0	0	0	0	0	0	0
E9Q9Q2	362	E9Q9Q2	E9Q9Q2		R3hdm1	tr|E9Q9Q2|E9Q9Q2_MOUSE R3H domain containing 1 OS=Mus musculus OX=10090 GN=R3hdm1 PE=1 SV=1	0.799162	6.9952	2.15e-15	140.2	124.95	140.2					0.799162	6.9952	2.15e-15	140.2		1	S	STENELKYSEPRPWSSTDSDSSLRNLKPAVT	0	0	0	0	0	0	0	0
E9Q9Q2	365	E9Q9Q2	E9Q9Q2		R3hdm1	tr|E9Q9Q2|E9Q9Q2_MOUSE R3H domain containing 1 OS=Mus musculus OX=10090 GN=R3hdm1 PE=1 SV=1	0.396427	2.02036	0.000925722	75.316	46.59	75.316					0.396427	2.02036	0.000925722	75.316			S	NELKYSEPRPWSSTDSDSSLRNLKPAVTKAS	0	0	0	0	0	0	0	0
E9Q9R9	841	E9Q9R9	E9Q9R9		Dlg5	sp|E9Q9R9|DLG5_MOUSE Disks large homolog 5 OS=Mus musculus OX=10090 GN=Dlg5 PE=1 SV=1	0.864698	8.16844	2.04e-05	87.156	71.564	87.156					0.864698	8.16844	2.04e-05	87.156		1	S	EVQAHNKRNLLQHNNSTQTDIFYTDRLEDRK	0	0	0	0	0	0	0	0
E9QAT4	2101	E9QAT4	E9QAT4		Sec16a	sp|E9QAT4|SC16A_MOUSE Protein transport protein Sec16A OS=Mus musculus OX=10090 GN=Sec16a PE=1 SV=1	0.949394	13.4811	0.000407005	89.301	72.275	89.301					0.949394	13.4811	0.000407005	89.301		1	S	SPVWDLGSSSLTRAPSLTSDSEGKKPAQAVK	0	0	0	0	0	0	0	0
E9QAT4	1245	E9QAT4	E9QAT4		Sec16a	sp|E9QAT4|SC16A_MOUSE Protein transport protein Sec16A OS=Mus musculus OX=10090 GN=Sec16a PE=1 SV=1	0.999561	33.5707	0.00166905	76.655	62.992	76.655	0.999561	33.5707	0.00166905	76.655	0.99626	24.2551	0.0051086	61.435		1	S	RYSEPERPSSRASHYSDQLAPRQGYPEGYYN	558.8	895.84	388.03	502.17	427.2	756.16	401.13	599.96
E9QAT4	1342	E9QAT4	E9QAT4		Sec16a	sp|E9QAT4|SC16A_MOUSE Protein transport protein Sec16A OS=Mus musculus OX=10090 GN=Sec16a PE=1 SV=1	0.817894	6.52373	0.000712399	46.307	36.51	46.307	0.817894	6.52373	0.000712399	46.307						1	S	EKCDDHWRYDPRFTGSFDDDAEIHRDPYGEE	431.58	762.82	531.61	430.11	152.45	219.37	287.16	428.92
E9QAT4	2053	E9QAT4	E9QAT4		Sec16a	sp|E9QAT4|SC16A_MOUSE Protein transport protein Sec16A OS=Mus musculus OX=10090 GN=Sec16a PE=1 SV=1	0.995613	23.5589	0.00185212	52.887	42.253	52.887					0.995613	23.5589	0.00185212	52.887		1	S	PQEAKSPDPEMVPRGSPVRHSPPELSQEEFG	0	0	0	0	0	0	0	0
E9QAT4	2063	E9QAT4	E9QAT4		Sec16a	sp|E9QAT4|SC16A_MOUSE Protein transport protein Sec16A OS=Mus musculus OX=10090 GN=Sec16a PE=1 SV=1	0.673936	6.12047	2.77e-05	51.089	45.248	51.089					0.673936	6.12047	2.77e-05	51.089		1	S	MVPRGSPVRHSPPELSQEEFGESFADPGSSR	0	0	0	0	0	0	0	0
F2Z3U3	1027	F2Z3U3	F2Z3U3		Raph1	tr|F2Z3U3|F2Z3U3_MOUSE Ras association (RalGDS/AF-6) and pleckstrin homology domains 1 OS=Mus musculus OX=10090 GN=Raph1 PE=1 SV=2	0.858231	8.30887	1.12e-09	125.03	108.49	87.001	0.858231	8.30887	0.000273832	89.301	0.741256	6.27509	1.12e-09	125.03		1	S	VDSLVSKFAPPAESGSPSKETPPPPAAPPKP	2921.2	3514.3	676.44	2401.3	1741.9	2283.5	1886.5	2330
F2Z3U3	1169	F2Z3U3	F2Z3U3		Raph1	tr|F2Z3U3|F2Z3U3_MOUSE Ras association (RalGDS/AF-6) and pleckstrin homology domains 1 OS=Mus musculus OX=10090 GN=Raph1 PE=1 SV=2	0.826842	6.92888	4.87e-07	82.65	72.801	63.085	0.826842	6.92888	4.87e-07	82.65	0.77727	5.44973	1.79e-06	73.361		1	S	SEQPAMTTVVPQVPTSPKSSLSVQPGFLADL	1002.7	1364	620.54	1034.4	515.66	812.96	514.42	641.57
F2Z3U3	899	F2Z3U3	F2Z3U3		Raph1	tr|F2Z3U3|F2Z3U3_MOUSE Ras association (RalGDS/AF-6) and pleckstrin homology domains 1 OS=Mus musculus OX=10090 GN=Raph1 PE=1 SV=2	0.999967	45.4503	1.83e-61	205.28	164.06	103.61	0.999967	45.4503	5.35e-11	132.97	0.979882	16.8871	1.83e-61	205.28		1	S	DSQPLKSLPASGTPQSPPAVKAKPKWQPSSI	4342.6	5851.4	4595.5	4552.8	3807.7	4550.8	3152.1	4203.4
F2Z3U3	192	F2Z3U3	F2Z3U3		Raph1	tr|F2Z3U3|F2Z3U3_MOUSE Ras association (RalGDS/AF-6) and pleckstrin homology domains 1 OS=Mus musculus OX=10090 GN=Raph1 PE=1 SV=2	0.982642	17.5489	4.55e-08	119.88	103.41	119.88	0.982642	17.5489	4.55e-08	119.88	0.948624	14.2317	0.00177382	62.891		1	S	EDPKPLVTNQHRRTASAGTVSDAEARSISNS	1580	1816.9	472.84	1761.7	874.22	1085.7	477.2	772.46
F6QRE9	1182	F6QRE9	F6QRE9		Erich3	sp|F6QRE9|ERIC3_MOUSE Glutamate rich 3 OS=Mus musculus OX=10090 GN=Erich3 PE=2 SV=3	0.25	0	0.00471834	40.113	32.389	40.113					0.25	0	0.00471834	40.113			S	RAATERKDFLEEAPISASTGEVQASPREVFR	0	0	0	0	0	0	0	0
F6QRE9	1184	F6QRE9	F6QRE9		Erich3	sp|F6QRE9|ERIC3_MOUSE Glutamate rich 3 OS=Mus musculus OX=10090 GN=Erich3 PE=2 SV=3	0.25	0	0.00471834	40.113	32.389	40.113					0.25	0	0.00471834	40.113			S	ATERKDFLEEAPISASTGEVQASPREVFRGN	0	0	0	0	0	0	0	0
F6QRE9	1191	F6QRE9	F6QRE9		Erich3	sp|F6QRE9|ERIC3_MOUSE Glutamate rich 3 OS=Mus musculus OX=10090 GN=Erich3 PE=2 SV=3	0.25	0	0.00471834	40.113	32.389	40.113					0.25	0	0.00471834	40.113			S	LEEAPISASTGEVQASPREVFRGNHELCKED	0	0	0	0	0	0	0	0
F6QRE9	1375	F6QRE9	F6QRE9		Erich3	sp|F6QRE9|ERIC3_MOUSE Glutamate rich 3 OS=Mus musculus OX=10090 GN=Erich3 PE=2 SV=3	1	42.3249	0.00252973	42.325	29.965	42.325					1	42.3249	0.00252973	42.325		1	S	PGQESKALWPQGRGLSHDGEGLLGAPGPEAD	0	0	0	0	0	0	0	0
F6SEU4	766	F6SEU4	F6SEU4	Ras/Rap GTPase-activating protein SynGAP	Syngap1	sp|F6SEU4|SYGP1_MOUSE Ras/Rap GTPase-activating protein SynGAP OS=Mus musculus OX=10090 GN=Syngap1 PE=1 SV=2	0.643813	4.44564	0.0102839	47.189	32.522	47.189	0.643813	4.44564	0.0102839	47.189						1	S	PSAEMQGYMMRDLNSSIDLQSFMARGLNSSM	401.4	784.73	398.08	561.59	230.38	565.04	344.25	666.64
F6SEU4	771	F6SEU4	F6SEU4	Ras/Rap GTPase-activating protein SynGAP	Syngap1	sp|F6SEU4|SYGP1_MOUSE Ras/Rap GTPase-activating protein SynGAP OS=Mus musculus OX=10090 GN=Syngap1 PE=1 SV=2	0.901795	10.5208	0.000549635	80.037	64.074	80.037					0.901795	10.5208	0.000549635	80.037		1	S	QGYMMRDLNSSIDLQSFMARGLNSSMDMARL	0	0	0	0	0	0	0	0
F6SEU4	1111	F6SEU4	F6SEU4	Ras/Rap GTPase-activating protein SynGAP	Syngap1	sp|F6SEU4|SYGP1_MOUSE Ras/Rap GTPase-activating protein SynGAP OS=Mus musculus OX=10090 GN=Syngap1 PE=1 SV=2	0.975301	16.5649	1.35e-12	107.45	89.153	107.45	0.971175	18.2855	5.85e-05	51.963	0.975301	16.5649	1.35e-12	107.45		1	S	YGPARPRQQSLSKEGSIGGSGGSGGGGGGGL	1773.8	5312.1	2399.3	3006.2	1566	2475.6	1292.3	1784.9
F6SEU4	1115	F6SEU4	F6SEU4	Ras/Rap GTPase-activating protein SynGAP	Syngap1	sp|F6SEU4|SYGP1_MOUSE Ras/Rap GTPase-activating protein SynGAP OS=Mus musculus OX=10090 GN=Syngap1 PE=1 SV=2	0.819205	6.74065	1.93e-12	106.39	93.836	56.533	0.81037	6.33072	1.93e-12	106.39	0.819205	6.74065	3.35e-05	56.533		1	S	RPRQQSLSKEGSIGGSGGSGGGGGGGLKPSI	3751	6977.4	7825.2	4181.5	4153.9	2439.4	3004.8	2001.6
F6SEU4	1118	F6SEU4	F6SEU4	Ras/Rap GTPase-activating protein SynGAP	Syngap1	sp|F6SEU4|SYGP1_MOUSE Ras/Rap GTPase-activating protein SynGAP OS=Mus musculus OX=10090 GN=Syngap1 PE=1 SV=2	0.998369	27.8681	1.07e-05	94.203	74.365	94.203	0.998369	27.8681	1.07e-05	94.203						1	S	QQSLSKEGSIGGSGGSGGGGGGGLKPSITKQ	2794.2	3169	697.26	3607	3977.9	3388.7	3143.2	3453.1
F6SEU4	180	F6SEU4	F6SEU4	Ras/Rap GTPase-activating protein SynGAP	Syngap1	sp|F6SEU4|SYGP1_MOUSE Ras/Rap GTPase-activating protein SynGAP OS=Mus musculus OX=10090 GN=Syngap1 PE=1 SV=2	0.536955	1.06417	2.01e-43	162.12	147.81	114.76	0.536955	1.06417	2.01e-43	162.12						1	S	SADHDRARLMQSFKESHSHESLLSPSSAAEA	1044.3	720.66	100.45	180.09	453.38	710.65	779.57	940.05
F6SEU4;Q3UHC7	571;499	F6SEU4;Q3UHC7	F6SEU4	Ras/Rap GTPase-activating protein SynGAP;Disabled homolog 2-interacting protein	Syngap1;Dab2ip	sp|F6SEU4|SYGP1_MOUSE Ras/Rap GTPase-activating protein SynGAP OS=Mus musculus OX=10090 GN=Syngap1 PE=1 SV=2;sp|Q3UHC7|DAB2P_MOUSE Disabled homolog 2-interacting protein OS=Mus musculus OX=10090 GN=Dab2ip PE=1 SV=1	1	60.4363	0.0184913	60.436	40.65	60.436	1	60.4363	0.0184913	60.436						1	S	NSHCVFPRELKEVFASWRLRCAERGREDIAD;NSYCVFPRELKEVFASWRQECSSRGRPDISE	402.78	769.03	161.49	495.32	448.75	667.13	469.42	409.53
F6SEU4	1201	F6SEU4	F6SEU4	Ras/Rap GTPase-activating protein SynGAP	Syngap1	sp|F6SEU4|SYGP1_MOUSE Ras/Rap GTPase-activating protein SynGAP OS=Mus musculus OX=10090 GN=Syngap1 PE=1 SV=2	1	134.13	2.2e-07	134.13	78.036	134.13	1	134.13	2.2e-07	134.13						1	S	ESRLDRVKEYEEEIHSLKERLHMSNRKLEEY	5950.6	9340.4	841.57	7687.2	7005.2	8169.5	5740.2	7471.8
F6SEU4	1070	F6SEU4	F6SEU4	Ras/Rap GTPase-activating protein SynGAP	Syngap1	sp|F6SEU4|SYGP1_MOUSE Ras/Rap GTPase-activating protein SynGAP OS=Mus musculus OX=10090 GN=Syngap1 PE=1 SV=2	0.99998	48.165	5.37e-25	177.93	136.82	177.93	0.99998	48.165	5.37e-25	177.93	0.97322	15.8836	0.00468679	62.042		1	S	GGSGGGQPPPLQRGKSQQLTVSAAQKPRPSS	14677	25793	2175.8	14642	10604	19804	9529.1	12997
F6SEU4	779	F6SEU4	F6SEU4	Ras/Rap GTPase-activating protein SynGAP	Syngap1	sp|F6SEU4|SYGP1_MOUSE Ras/Rap GTPase-activating protein SynGAP OS=Mus musculus OX=10090 GN=Syngap1 PE=1 SV=2	0.633748	2.38215	0.0130604	52.49	35.464	52.49	0.633748	2.38215	0.0130604	52.49						1	S	NSSIDLQSFMARGLNSSMDMARLPSPTKEKP	4915.8	6302.5	3452.7	5133.8	3971.5	4598.7	2742.2	4284.3
F6SEU4	780	F6SEU4	F6SEU4	Ras/Rap GTPase-activating protein SynGAP	Syngap1	sp|F6SEU4|SYGP1_MOUSE Ras/Rap GTPase-activating protein SynGAP OS=Mus musculus OX=10090 GN=Syngap1 PE=1 SV=2	0.979813	16.8607	2.3e-16	164.48	116.93	164.48	0.979813	16.8607	2.3e-16	164.48						1	S	SSIDLQSFMARGLNSSMDMARLPSPTKEKPP	6790.6	8609.4	5156.2	7140.3	6014.4	6703.8	4246.6	6009.8
F6SEU4	12	F6SEU4	F6SEU4	Ras/Rap GTPase-activating protein SynGAP	Syngap1	sp|F6SEU4|SYGP1_MOUSE Ras/Rap GTPase-activating protein SynGAP OS=Mus musculus OX=10090 GN=Syngap1 PE=1 SV=2	0.99988	39.2255	0.00038884	87.667	65.817	87.667	0.99988	39.2255	0.00038884	87.667						1	S	____MSRSRASIHRGSIPAMSYAPFRDVRGP	858.66	3231.1	1012	1325.4	1997.7	2468.9	1297.2	1878
F6SEU4	17	F6SEU4	F6SEU4	Ras/Rap GTPase-activating protein SynGAP	Syngap1	sp|F6SEU4|SYGP1_MOUSE Ras/Rap GTPase-activating protein SynGAP OS=Mus musculus OX=10090 GN=Syngap1 PE=1 SV=2	0.954611	13.2288	0.00483369	60.118	40.477	44.377	0.917939	10.4867	0.00483369	60.118	0.954611	13.2288	0.0257942	44.377		1	S	SRSRASIHRGSIPAMSYAPFRDVRGPPMHRT	440.16	1576.6	794.79	830.86	1043.4	1138.3	784.88	1253.3
F6SEU4	371	F6SEU4	F6SEU4	Ras/Rap GTPase-activating protein SynGAP	Syngap1	sp|F6SEU4|SYGP1_MOUSE Ras/Rap GTPase-activating protein SynGAP OS=Mus musculus OX=10090 GN=Syngap1 PE=1 SV=2	0.321453	0	2.25e-23	105.08	98.643	82.261	0.321453	0	2.25e-23	105.08							S	RHFTEQWYPVTLPTGSGGSGGMGSGGGGGSG	0	0	0	0	0	0	0	0
F6SEU4	374	F6SEU4	F6SEU4	Ras/Rap GTPase-activating protein SynGAP	Syngap1	sp|F6SEU4|SYGP1_MOUSE Ras/Rap GTPase-activating protein SynGAP OS=Mus musculus OX=10090 GN=Syngap1 PE=1 SV=2	0.321453	0	2.25e-23	105.08	98.643	82.261	0.321453	0	2.25e-23	105.08							S	TEQWYPVTLPTGSGGSGGMGSGGGGGSGGGS	0	0	0	0	0	0	0	0
F6SEU4	895	F6SEU4	F6SEU4	Ras/Rap GTPase-activating protein SynGAP	Syngap1	sp|F6SEU4|SYGP1_MOUSE Ras/Rap GTPase-activating protein SynGAP OS=Mus musculus OX=10090 GN=Syngap1 PE=1 SV=2	0.950128	15.9668	0.00267671	53.995	41.039	53.995	0.950128	15.9668	0.00267671	53.995						1	S	ALGLRPAPAGRLSQGSGSSITAAGMRLSQMG	704.76	717.05	489.67	637.2	688.15	623.05	541.42	636.37
F6SEU4	1135	F6SEU4	F6SEU4	Ras/Rap GTPase-activating protein SynGAP	Syngap1	sp|F6SEU4|SYGP1_MOUSE Ras/Rap GTPase-activating protein SynGAP OS=Mus musculus OX=10090 GN=Syngap1 PE=1 SV=2	0.995383	23.3724	3.11e-06	107.34	80.903	107.34	0.958606	13.6698	5.21e-05	80.972	0.995383	23.3724	3.11e-06	107.34		1	S	GGGGGGLKPSITKQHSQTPSTLNPTMPASER	335.17	741.38	139.57	701.81	348.51	1072.3	277.19	432.65
F6SEU4	117	F6SEU4	F6SEU4	Ras/Rap GTPase-activating protein SynGAP	Syngap1	sp|F6SEU4|SYGP1_MOUSE Ras/Rap GTPase-activating protein SynGAP OS=Mus musculus OX=10090 GN=Syngap1 PE=1 SV=2	1	64.1212	8.24e-06	81.888	67.126	64.121	1	64.1212	0.000602766	64.121	1	70.6357	8.24e-06	81.888		1	S	LGRSRRKSVPGGKQYSMEAAPAAPFRPSQGF	1117.4	2207.1	843.03	1475	1821.2	2125.4	753.88	1511.8
F6SEU4	87	F6SEU4	F6SEU4	Ras/Rap GTPase-activating protein SynGAP	Syngap1	sp|F6SEU4|SYGP1_MOUSE Ras/Rap GTPase-activating protein SynGAP OS=Mus musculus OX=10090 GN=Syngap1 PE=1 SV=2	0.995868	23.8199	4.1e-54	192.57	166.56	157.47	0.982509	17.4953	2.34e-12	130.79	0.995868	23.8199	4.1e-54	192.57		1	S	RRSESSRNKLLRRTVSVPVEGRPHGEHEYHL	7468.1	22051	5167.7	12301	13300	21137	8050	11940
F6SEU4	985	F6SEU4	F6SEU4	Ras/Rap GTPase-activating protein SynGAP	Syngap1	sp|F6SEU4|SYGP1_MOUSE Ras/Rap GTPase-activating protein SynGAP OS=Mus musculus OX=10090 GN=Syngap1 PE=1 SV=2	0.997073	25.8175	0.00145364	77.744	58.473	77.744	0.997073	25.8175	0.00145364	77.744						1	S	EPPGDTFAPFHGYSKSEDLSSGVPKPPAASI	995.23	1106	466.57	1456.5	1284.8	1194.4	1480.2	1221.5
F6SEU4	1003	F6SEU4	F6SEU4	Ras/Rap GTPase-activating protein SynGAP	Syngap1	sp|F6SEU4|SYGP1_MOUSE Ras/Rap GTPase-activating protein SynGAP OS=Mus musculus OX=10090 GN=Syngap1 PE=1 SV=2	0.324745	0	3.61e-05	47.663	44.35	47.663	0.324745	0	3.61e-05	47.663							S	LSSGVPKPPAASILHSHSYSDEFGPSGTDFT	0	0	0	0	0	0	0	0
F6SEU4	1005	F6SEU4	F6SEU4	Ras/Rap GTPase-activating protein SynGAP	Syngap1	sp|F6SEU4|SYGP1_MOUSE Ras/Rap GTPase-activating protein SynGAP OS=Mus musculus OX=10090 GN=Syngap1 PE=1 SV=2	0.324745	0	3.61e-05	47.663	44.35	47.663	0.324745	0	3.61e-05	47.663							S	SGVPKPPAASILHSHSYSDEFGPSGTDFTRR	0	0	0	0	0	0	0	0
F6SEU4	1007	F6SEU4	F6SEU4	Ras/Rap GTPase-activating protein SynGAP	Syngap1	sp|F6SEU4|SYGP1_MOUSE Ras/Rap GTPase-activating protein SynGAP OS=Mus musculus OX=10090 GN=Syngap1 PE=1 SV=2	0.324745	0	3.61e-05	47.663	44.35	47.663	0.324745	0	3.61e-05	47.663							S	VPKPPAASILHSHSYSDEFGPSGTDFTRRQL	0	0	0	0	0	0	0	0
F6SEU4	823	F6SEU4	F6SEU4	Ras/Rap GTPase-activating protein SynGAP	Syngap1	sp|F6SEU4|SYGP1_MOUSE Ras/Rap GTPase-activating protein SynGAP OS=Mus musculus OX=10090 GN=Syngap1 PE=1 SV=2	0.319955	0	6.3e-05	83.314	68.112	83.314	0.319955	0	6.3e-05	83.314	0.239719	0	0.00337097	53.569			S	VSRPPLARSSPAYCTSSSDITEPEQKMLSVN	0	0	0	0	0	0	0	0
F6SEU4	824	F6SEU4	F6SEU4	Ras/Rap GTPase-activating protein SynGAP	Syngap1	sp|F6SEU4|SYGP1_MOUSE Ras/Rap GTPase-activating protein SynGAP OS=Mus musculus OX=10090 GN=Syngap1 PE=1 SV=2	0.762087	9.32723	4.4e-15	139.58	124.19	108.89	0.762087	9.32723	4.4e-15	139.58	0.239719	0	0.00337097	53.569		1	S	SRPPLARSSPAYCTSSSDITEPEQKMLSVNK	1808.8	2445	1136.2	2814.4	1764.4	1696.2	1487.2	1625.3
F6SEU4	825	F6SEU4	F6SEU4	Ras/Rap GTPase-activating protein SynGAP	Syngap1	sp|F6SEU4|SYGP1_MOUSE Ras/Rap GTPase-activating protein SynGAP OS=Mus musculus OX=10090 GN=Syngap1 PE=1 SV=2	0.467537	0	4.4e-15	139.58	124.19	139.58	0.467537	0	4.4e-15	139.58	0.239719	0	0.00337097	53.569			S	RPPLARSSPAYCTSSSDITEPEQKMLSVNKS	0	0	0	0	0	0	0	0
F6SEU4	840	F6SEU4	F6SEU4	Ras/Rap GTPase-activating protein SynGAP	Syngap1	sp|F6SEU4|SYGP1_MOUSE Ras/Rap GTPase-activating protein SynGAP OS=Mus musculus OX=10090 GN=Syngap1 PE=1 SV=2	0.542244	0.735609	0.00289202	53.001	41.387	53.001	0.542244	0.735609	0.00289202	53.001						1	S	SDITEPEQKMLSVNKSVSMLDLQGDGPGGRL	337.56	1034.3	251.29	646.67	387.79	1280.8	617.07	1098.9
F6SEU4	154	F6SEU4	F6SEU4	Ras/Rap GTPase-activating protein SynGAP	Syngap1	sp|F6SEU4|SYGP1_MOUSE Ras/Rap GTPase-activating protein SynGAP OS=Mus musculus OX=10090 GN=Syngap1 PE=1 SV=2	0.333333	0	4.87e-05	96.64	69.967	96.64	0.333333	0	4.87e-05	96.64	0.333333	0	0.00443078	59.57			S	SSIKRTKSQPKLDRTSSFRQILPRFRSADHD	0	0	0	0	0	0	0	0
F6SEU4	155	F6SEU4	F6SEU4	Ras/Rap GTPase-activating protein SynGAP	Syngap1	sp|F6SEU4|SYGP1_MOUSE Ras/Rap GTPase-activating protein SynGAP OS=Mus musculus OX=10090 GN=Syngap1 PE=1 SV=2	0.998387	27.9936	3.54e-05	104.22	86.402	104.22	0.998387	27.9936	3.54e-05	104.22	0.333333	0	0.00443078	59.57		1	S	SIKRTKSQPKLDRTSSFRQILPRFRSADHDR	1761.8	1111.7	1146.4	3886.9	235.75	1201.2	450.67	1140
F6SEU4	1162	F6SEU4	F6SEU4	Ras/Rap GTPase-activating protein SynGAP	Syngap1	sp|F6SEU4|SYGP1_MOUSE Ras/Rap GTPase-activating protein SynGAP OS=Mus musculus OX=10090 GN=Syngap1 PE=1 SV=2	0.862938	8.26467	9.46e-05	56.95	40.827	56.95	0.862938	8.26467	9.46e-05	56.95						1	S	ASERTVAWVSNMPHLSADIESAHIEREEYKL	0	138.3	0	145.58	271.12	128.03	82.828	165.07
F6T2U3	75	F6T2U3	F6T2U3		Gm9925	tr|F6T2U3|F6T2U3_MOUSE Predicted gene 9925 OS=Mus musculus OX=10090 GN=Gm9925 PE=4 SV=1	1	61.038	0.0462806	61.038	38.84	61.038	1	61.038	0.0462806	61.038						2	S	RKGCRDVELSLSPGRSLVFASGQPLLPKPRR	0	0	0	0	0	0	0	0
F6T2U3	80	F6T2U3	F6T2U3		Gm9925	tr|F6T2U3|F6T2U3_MOUSE Predicted gene 9925 OS=Mus musculus OX=10090 GN=Gm9925 PE=4 SV=1	1	61.038	0.0462806	61.038	38.84	61.038	1	61.038	0.0462806	61.038						2	S	DVELSLSPGRSLVFASGQPLLPKPRRWRAGR	0	0	0	0	0	0	0	0
F6UK53	55	F6UK53	F6UK53		4933403O08Rik	tr|F6UK53|F6UK53_MOUSE RIKEN cDNA 4933403O08 gene OS=Mus musculus OX=10090 GN=4933403O08Rik PE=1 SV=1	0.999082	30.3655	0.000529422	83.617	61.143	83.617					0.999082	30.3655	0.000529422	83.617		1	S	LWVPEFQRLEVTGIASPEERGKGTAILVAGV	0	0	0	0	0	0	0	0
F6XLV1	54	F6XLV1	F6XLV1		E030010N08Rik	sp|F6XLV1|CRCC2_MOUSE Ciliary rootlet coiled-coil protein 2 OS=Mus musculus OX=10090 GN=Crocc2 PE=3 SV=2	0.986621	18.6774	0.0387858	44.616	25.836	44.616					0.986621	18.6774	0.0387858	44.616		1	S	REDRALTVRGEGQRASPTPVPARIREIVSSS	0	0	0	0	0	0	0	0
F6XLV1	1343	F6XLV1	F6XLV1		E030010N08Rik	sp|F6XLV1|CRCC2_MOUSE Ciliary rootlet coiled-coil protein 2 OS=Mus musculus OX=10090 GN=Crocc2 PE=3 SV=2	1	87.3076	0.00438775	87.308	55.373	87.308					1	87.3076	0.00438775	87.308		1	S	STLCSGLGQSRNLLASPKRPHSPTTGSSQTR	0	0	0	0	0	0	0	0
F6XLV1	1378	F6XLV1	F6XLV1		E030010N08Rik	sp|F6XLV1|CRCC2_MOUSE Ciliary rootlet coiled-coil protein 2 OS=Mus musculus OX=10090 GN=Crocc2 PE=3 SV=2	1	56.3592	0.00928023	56.359	42.201	56.359					1	56.3592	0.00928023	56.359		1	S	RTSPPTRSYSPARWPSPVPVDPKSEVIDVAF	0	0	0	0	0	0	0	0
F6ZDS4	453	F6ZDS4	F6ZDS4	Nucleoprotein TPR	Tpr	sp|F6ZDS4|TPR_MOUSE Nucleoprotein TPR OS=Mus musculus OX=10090 GN=Tpr PE=1 SV=1	0.842452	7.28228	5.62e-06	83.253	70.079	83.253					0.842452	7.28228	5.62e-06	83.253		1	S	KRKGAILSEEELAAMSPTAAAVAKIVKPGMK	0	0	0	0	0	0	0	0
F6ZDS4	597	F6ZDS4	F6ZDS4	Nucleoprotein TPR	Tpr	sp|F6ZDS4|TPR_MOUSE Nucleoprotein TPR OS=Mus musculus OX=10090 GN=Tpr PE=1 SV=1	0.854186	8.20947	8e-15	91.407	80.504	91.407					0.854186	8.20947	8e-15	91.407		1	S	EEARGNHVIRDEEVSSADISSSSEVISQHLV	0	0	0	0	0	0	0	0
F6ZDS4	2141	F6ZDS4	F6ZDS4	Nucleoprotein TPR	Tpr	sp|F6ZDS4|TPR_MOUSE Nucleoprotein TPR OS=Mus musculus OX=10090 GN=Tpr PE=1 SV=1	0.999787	36.7076	0.0114269	53.569	33.782	52.247	0.999787	36.7076	0.0124437	52.247	0.992201	21.0454	0.0114269	53.569		1	S	QPTSASERQTPQAPQSPRRPPHPLPPRLTIH	164.1	672.98	0	438.48	134.88	278.46	101.16	257.01
F6ZNL5	1330	F6ZNL5	F6ZNL5		Pcdh11x	tr|F6ZNL5|F6ZNL5_MOUSE Protocadherin 11 X-linked OS=Mus musculus OX=10090 GN=Pcdh11x PE=1 SV=1	1	51.9267	0.00479275	60.401	51.446	51.927	1	51.9267	0.0117205	51.927	0.659241	5.87626	0.00479275	60.401		1	S	TTFTSGQQARSSRGDSPIIEEHPL_______	313.63	626.38	135.57	160.87	297.8	299.17	0	188.82
F8VPJ6	1177	F8VPJ6	F8VPJ6		Rfx7	tr|F8VPJ6|F8VPJ6_MOUSE Regulatory factor X
F8VPK8	1231	F8VPK8	F8VPK8		Pcdh9	tr|F8VPK8|F8VPK8_MOUSE Protocadherin 9 OS=Mus musculus OX=10090 GN=Pcdh9 PE=1 SV=1	0.998892	29.5482	1.35e-05	101.89	70.602	101.89	0.998892	29.5482	1.35e-05	101.89						1	S	LANLKSYKQAGGTIESPKEHQL_________	2095.5	5328.9	471.38	2811.7	2520.7	3381.1	2157.1	3412.4
F8VPP8	372	F8VPP8	F8VPP8		Zc3h7b	tr|F8VPP8|F8VPP8_MOUSE Zinc finger CCCH type containing 7B OS=Mus musculus OX=10090 GN=Zc3h7b PE=1 SV=1	0.999971	45.3664	7.62e-19	113.47	102.86	113.47	0.999971	45.3664	7.62e-19	113.47						1	S	EARLGALDSFGSARGSLDKPDSFLEETSSQD	1121.9	2556.3	175.91	808.99	1509.5	1601	816.77	1266.5
F8VPQ2	867	F8VPQ2	F8VPQ2		Arid4a	sp|F8VPQ2|ARI4A_MOUSE AT-rich interactive domain-containing protein 4A OS=Mus musculus OX=10090 GN=Arid4a PE=1 SV=1	1	82.4167	6.02e-05	99.283	74.428	82.417	1	82.4167	0.00121325	82.417	1	99.2826	6.02e-05	99.283		1	S	YEKEKKLKRKILGQQSPEKKLRLDNGMEMTT	1484.5	2300.6	384.02	1904.7	1523.4	1759.8	1560.6	2388.4
F8VPU2	427	F8VPU2	F8VPU2	FERM
F8VPU2	433	F8VPU2	F8VPU2	FERM
F8VPU2	340	F8VPU2	F8VPU2	FERM
F8VPU2	20	F8VPU2	F8VPU2	FERM
F8VPU2	512	F8VPU2	F8VPU2	FERM
F8VPU2	389	F8VPU2	F8VPU2	FERM
F8VPU2	403	F8VPU2	F8VPU2	FERM
F8VPU2	874	F8VPU2	F8VPU2	FERM
F8VPU2	875	F8VPU2	F8VPU2	FERM
F8VPU2	892	F8VPU2	F8VPU2	FERM
F8VPZ3	1371	F8VPZ3	F8VPZ3	Ubiquitin carboxyl-terminal hydrolase	Usp32	sp|F8VPZ3|UBP32_MOUSE Ubiquitin carboxyl-terminal hydrolase 32 OS=Mus musculus OX=10090 GN=Usp32 PE=2 SV=1	0.332557	0	0.0200278	42.209	12.151	42.209					0.332557	0	0.0200278	42.209			S	VLLSKSPSSLSANVTSSPKGSPSSSRKSGAS	0	0	0	0	0	0	0	0
F8VPZ3	1372	F8VPZ3	F8VPZ3	Ubiquitin carboxyl-terminal hydrolase	Usp32	sp|F8VPZ3|UBP32_MOUSE Ubiquitin carboxyl-terminal hydrolase 32 OS=Mus musculus OX=10090 GN=Usp32 PE=2 SV=1	0.974875	16.4864	2.43e-40	186.29	145.05	186.29	0.839267	7.86426	0.000451447	78.486	0.974875	16.4864	2.43e-40	186.29		1	S	LLSKSPSSLSANVTSSPKGSPSSSRKSGASC	1210.4	1121.5	384.23	525.28	543.96	961.3	606.16	888.78
F8VPZ3	416	F8VPZ3	F8VPZ3	Ubiquitin carboxyl-terminal hydrolase	Usp32	sp|F8VPZ3|UBP32_MOUSE Ubiquitin carboxyl-terminal hydrolase 32 OS=Mus musculus OX=10090 GN=Usp32 PE=2 SV=1	0.998963	32.8479	0.000189767	70.529	60.332	70.529					0.998963	32.8479	0.000189767	70.529		1	S	MQWWQQWKEYVKYDASPVVIEPSSVLNGGKF	0	0	0	0	0	0	0	0
F8VPZ9	1427	F8VPZ9	F8VPZ9		Gltscr1	sp|F8VPZ9|BICRA_MOUSE BRD4-interacting chromatin-remodeling complex-associated protein OS=Mus musculus OX=10090 GN=Bicra PE=1 SV=1	0.983411	17.733	3.92e-13	150.06	122.73	150.06	0.756286	4.95961	0.00253033	71.555	0.983411	17.733	3.92e-13	150.06		1	S	PGAAEGAQGRPRGAGSPTPLPTKVDEATSGL	1027.5	1386.7	238.89	1249	890.02	1087	545.99	778.8
F8VQC1	620	F8VQC1	F8VQC1	Signal recognition particle subunit SRP72	Srp72	tr|F8VQC1|F8VQC1_MOUSE Signal recognition particle subunit SRP72 OS=Mus musculus OX=10090 GN=Srp72 PE=1 SV=1	0.481215	0	0.00071385	42.582	31.593	42.582					0.481215	0	0.00071385	42.582			S	ATAGASSELDASKAVSSPPTSPRPGSAATIS	0	0	0	0	0	0	0	0
F8VQC1	621	F8VQC1	F8VQC1	Signal recognition particle subunit SRP72	Srp72	tr|F8VQC1|F8VQC1_MOUSE Signal recognition particle subunit SRP72 OS=Mus musculus OX=10090 GN=Srp72 PE=1 SV=1	0.801352	7.79449	1.73e-10	84.58	69.636	51.445	0.553756	3.73374	1.73e-10	84.58	0.801352	7.79449	0.00071385	51.445		1;2	S	TAGASSELDASKAVSSPPTSPRPGSAATISS	2855.1	2908.2	2355.6	2255.7	2497.8	2432.1	2298.7	2779.3
F8VQC1	625	F8VQC1	F8VQC1	Signal recognition particle subunit SRP72	Srp72	tr|F8VQC1|F8VQC1_MOUSE Signal recognition particle subunit SRP72 OS=Mus musculus OX=10090 GN=Srp72 PE=1 SV=1	0.606498	3.53701	2.17e-05	55.358	40.22	41.591	0.606498	3.53701	0.00210663	41.591	0.58742	0.775453	2.17e-05	55.358		2	S	SSELDASKAVSSPPTSPRPGSAATISSSASN	0	0	0	0	0	0	0	0
F8VQK3	41	F8VQK3	F8VQK3		Gucy1a2	tr|F8VQK3|F8VQK3_MOUSE guanylate cyclase OS=Mus musculus OX=10090 GN=Gucy1a2 PE=1 SV=1	0.903555	9.7242	0.000381423	62.69	52.769	62.69					0.903555	9.7242	0.000381423	62.69		1	S	EGECPLSRLCWNGSRSPPGPPGSREAAKAAT	0	0	0	0	0	0	0	0
F8VQK3	669	F8VQK3	F8VQK3		Gucy1a2	tr|F8VQK3|F8VQK3_MOUSE guanylate cyclase OS=Mus musculus OX=10090 GN=Gucy1a2 PE=1 SV=1	0.994723	22.7531	0.00184799	65.563	47.754	65.563	0.953479	13.1167	0.0181176	41.399	0.994723	22.7531	0.00184799	65.563		1	S	INVSPTTYQLLKREDSFTFIPRSREELPDNF	0	146.87	109.62	0	0	0	0	115
G3UW55	79	G3UW55	G3UW55		A230065H16Rik	tr|G3UW55|G3UW55_MOUSE LBH domain containing 2 OS=Mus musculus OX=10090 GN=Lbhd2 PE=1 SV=1	0.965022	14.4075	4.15e-30	159.88	133.09	78.234					0.965022	14.4075	4.15e-30	159.88		1	S	QRGTPQIQAAAAPSPSPPGKEADDDVIQGAS	0	0	0	0	0	0	0	0
G3UW55	40	G3UW55	G3UW55		A230065H16Rik	tr|G3UW55|G3UW55_MOUSE LBH domain containing 2 OS=Mus musculus OX=10090 GN=Lbhd2 PE=1 SV=1	0.999191	32.0364	0.00444222	40.856	29.75	40.856					0.999191	32.0364	0.00444222	40.856		1	S	VGVREKGPWLCQRLPSIVVEPTEAGAVESGE	0	0	0	0	0	0	0	0
G3X9J0	448	G3X9J0	G3X9J0		Sipa1l3	sp|G3X9J0|SI1L3_MOUSE Signal-induced proliferation-associated 1-like protein 3 OS=Mus musculus OX=10090 GN=Sipa1l3 PE=1 SV=1	0.3818	0	7.21e-05	54.605	47.412	54.605					0.3818	0	7.21e-05	54.605			S	RNVSFSRASVGSPGGSSEAHMAEPTLSTHRT	0	0	0	0	0	0	0	0
G3X9J0	449	G3X9J0	G3X9J0		Sipa1l3	sp|G3X9J0|SI1L3_MOUSE Signal-induced proliferation-associated 1-like protein 3 OS=Mus musculus OX=10090 GN=Sipa1l3 PE=1 SV=1	0.3818	0	7.21e-05	54.605	47.412	54.605					0.3818	0	7.21e-05	54.605			S	NVSFSRASVGSPGGSSEAHMAEPTLSTHRTN	0	0	0	0	0	0	0	0
G3X9J0	164	G3X9J0	G3X9J0		Sipa1l3	sp|G3X9J0|SI1L3_MOUSE Signal-induced proliferation-associated 1-like protein 3 OS=Mus musculus OX=10090 GN=Sipa1l3 PE=1 SV=1	0.330354	0	0.00379656	44.807	29.931	44.807	0.330354	0	0.00379656	44.807							S	WPRSPGRAFLPLRHRSSSEITLSECDVEEPG	0	0	0	0	0	0	0	0
G3X9J0	165	G3X9J0	G3X9J0		Sipa1l3	sp|G3X9J0|SI1L3_MOUSE Signal-induced proliferation-associated 1-like protein 3 OS=Mus musculus OX=10090 GN=Sipa1l3 PE=1 SV=1	0.330354	0	0.00379656	44.807	29.931	44.807	0.330354	0	0.00379656	44.807							S	PRSPGRAFLPLRHRSSSEITLSECDVEEPGD	0	0	0	0	0	0	0	0
G3X9J0	166	G3X9J0	G3X9J0		Sipa1l3	sp|G3X9J0|SI1L3_MOUSE Signal-induced proliferation-associated 1-like protein 3 OS=Mus musculus OX=10090 GN=Sipa1l3 PE=1 SV=1	0.330354	0	0.00379656	44.807	29.931	44.807	0.330354	0	0.00379656	44.807							S	RSPGRAFLPLRHRSSSEITLSECDVEEPGDP	0	0	0	0	0	0	0	0
G3X9K3	234	G3X9K3	G3X9K3	Brefeldin A-inhibited guanine nucleotide-exchange protein 1	Arfgef1	sp|G3X9K3|BIG1_MOUSE Brefeldin A-inhibited guanine nucleotide-exchange protein 1 OS=Mus musculus OX=10090 GN=Arfgef1 PE=1 SV=1	0.999995	53.3932	1.64e-108	236.64	214.4	236.64	0.560838	1.0626	1.85e-05	72.805	0.999995	53.3932	1.64e-108	236.64		1;2	S	QMERERHRQQQHLLQSPVSHHEPESPHLRYL	86.624	430.12	162.97	93.605	137.21	294.57	343.51	211.83
G3X9K3	237	G3X9K3	G3X9K3	Brefeldin A-inhibited guanine nucleotide-exchange protein 1	Arfgef1	sp|G3X9K3|BIG1_MOUSE Brefeldin A-inhibited guanine nucleotide-exchange protein 1 OS=Mus musculus OX=10090 GN=Arfgef1 PE=1 SV=1	0.965665	14.4884	1.75e-06	85.573	70.645	85.573					0.965665	14.4884	1.75e-06	85.573		2	S	RERHRQQQHLLQSPVSHHEPESPHLRYLPPQ	0	0	0	0	0	0	0	0
G3X9K3	243	G3X9K3	G3X9K3	Brefeldin A-inhibited guanine nucleotide-exchange protein 1	Arfgef1	sp|G3X9K3|BIG1_MOUSE Brefeldin A-inhibited guanine nucleotide-exchange protein 1 OS=Mus musculus OX=10090 GN=Arfgef1 PE=1 SV=1	0.999647	34.4492	1.71e-07	93.446	79.431	93.446					0.999647	34.4492	1.71e-07	93.446		2	S	QQHLLQSPVSHHEPESPHLRYLPPQTVDHIN	0	0	0	0	0	0	0	0
G3X9K3	1566	G3X9K3	G3X9K3	Brefeldin A-inhibited guanine nucleotide-exchange protein 1	Arfgef1	sp|G3X9K3|BIG1_MOUSE Brefeldin A-inhibited guanine nucleotide-exchange protein 1 OS=Mus musculus OX=10090 GN=Arfgef1 PE=1 SV=1	0.999995	52.715	6.5e-07	92.781	77.242	92.781	0.999509	33.0894	0.000382893	84.365	0.999995	52.715	6.5e-07	92.781		1	S	PSAVSEKPLDAISQKSVDIHDSIQPRSSDNR	3604.1	5691.4	5557.4	3388.3	2717.9	2563.7	2341.2	3238
G3X9K3	52	G3X9K3	G3X9K3	Brefeldin A-inhibited guanine nucleotide-exchange protein 1	Arfgef1	sp|G3X9K3|BIG1_MOUSE Brefeldin A-inhibited guanine nucleotide-exchange protein 1 OS=Mus musculus OX=10090 GN=Arfgef1 PE=1 SV=1	0.960077	13.8109	0.0072508	45.221	35.024	45.221	0.960077	13.8109	0.0072508	45.221						1	S	CEVALEEIKVETEKQSPPHGEAKAGSGTLPP	650.82	2151.8	202.03	934.28	1192.6	928.4	1753.2	1237.4
G3XA20	62	G3XA20	G3XA20		Grip2	tr|G3XA20|G3XA20_MOUSE Glutamate receptor interacting protein 2 OS=Mus musculus OX=10090 GN=Grip2 PE=1 SV=1	0.835043	7.1915	2.97e-06	90.968	72.83	90.968	0.830211	6.90605	0.00112245	52.045	0.835043	7.1915	2.97e-06	90.968		1	S	EFRGITMVELIKREGSTLGLTISGGTDKDGK	1162.1	2654.5	298.56	1673.9	604.4	1760.6	1431.3	1449
G3XA20	336	G3XA20	G3XA20		Grip2	tr|G3XA20|G3XA20_MOUSE Glutamate receptor interacting protein 2 OS=Mus musculus OX=10090 GN=Grip2 PE=1 SV=1	0.998564	28.4211	0.00310665	69.01	52.378	69.01					0.998564	28.4211	0.00310665	69.01		1	S	LLASVTEKVRLEILPSPQSRRPLKPPEAVRI	0	0	0	0	0	0	0	0
G3XA20	43	G3XA20	G3XA20		Grip2	tr|G3XA20|G3XA20_MOUSE Glutamate receptor interacting protein 2 OS=Mus musculus OX=10090 GN=Grip2 PE=1 SV=1	1	179.422	8.5e-42	193.87	148.56	179.42	1	179.422	6.2e-23	179.42	1	155.473	8.5e-42	193.87		1	S	KDTAGADGALVCRRQSIPEEFRGITMVELIK	3542.2	7806.1	5104.1	3419.6	3173	6777.7	3803.3	4438
G3XA20	1037	G3XA20	G3XA20		Grip2	tr|G3XA20|G3XA20_MOUSE Glutamate receptor interacting protein 2 OS=Mus musculus OX=10090 GN=Grip2 PE=1 SV=1	0.494455	0	0.0264091	42.209	28.53	42.209	0.494455	0	0.0264091	42.209							S	NPLAQSRRTPGAPGPSSPQML__________	0	0	0	0	0	0	0	0
G3XA20	1038	G3XA20	G3XA20		Grip2	tr|G3XA20|G3XA20_MOUSE Glutamate receptor interacting protein 2 OS=Mus musculus OX=10090 GN=Grip2 PE=1 SV=1	0.734777	4.43049	0.0264091	42.209	28.53	42.161	0.494455	0	0.0264091	42.209	0.734777	4.43049	0.0265229	42.161		1	S	PLAQSRRTPGAPGPSSPQML___________	0	0	0	0	0	0	0	0
G3XA20	825	G3XA20	G3XA20		Grip2	tr|G3XA20|G3XA20_MOUSE Glutamate receptor interacting protein 2 OS=Mus musculus OX=10090 GN=Grip2 PE=1 SV=1	0.940343	11.9763	9.76e-16	160.75	101.51	147.4	0.940343	11.9763	3.4e-10	147.4	0.886528	8.92805	9.76e-16	160.75		1	S	VRSVTPQEWRPSRLKSSPPPLEPRRTSYTPG	2371.1	5413.1	714.94	3987.2	2932.3	4977.8	2793.5	3612.3
G3XA57	229	G3XA57	G3XA57	Rab11 family-interacting protein 2	Rab11fip2	sp|G3XA57|RFIP2_MOUSE Rab11 family-interacting protein 2 OS=Mus musculus OX=10090 GN=Rab11fip2 PE=1 SV=1	0.403716	0.465143	0.00114422	49.106	35.679	49.106					0.403716	0.465143	0.00114422	49.106			S	PFLLGPQRLSSAHSMSDLTGSHLSSEKLKSS	0	0	0	0	0	0	0	0
G5E829	1177	G5E829	G5E829	Plasma membrane calcium-transporting ATPase 1	Atp2b1	sp|G5E829|AT2B1_MOUSE Plasma membrane calcium-transporting ATPase 1 OS=Mus musculus OX=10090 GN=Atp2b1 PE=1 SV=1	0.499982	0	0.00334092	68.069	57.311	68.069	0.499982	0	0.00334092	68.069						1	S	IDDTDAEDDAPTKRNSSPPPSPNKNNNAVDS	2230.6	3072.4	751.05	2096.8	2877.5	1892.9	2740.1	2163.5
G5E829	1178	G5E829	G5E829	Plasma membrane calcium-transporting ATPase 1	Atp2b1	sp|G5E829|AT2B1_MOUSE Plasma membrane calcium-transporting ATPase 1 OS=Mus musculus OX=10090 GN=Atp2b1 PE=1 SV=1	0.830519	7.85828	0.00334092	68.069	57.311	45.879	0.499982	0	0.00334092	68.069	0.830519	7.85828	0.0262955	45.879		1	S	DDTDAEDDAPTKRNSSPPPSPNKNNNAVDSG	2230.6	3072.4	751.05	2096.8	2877.5	1892.9	2740.1	2163.5
G5E829	1139	G5E829	G5E829	Plasma membrane calcium-transporting ATPase 1	Atp2b1	sp|G5E829|AT2B1_MOUSE Plasma membrane calcium-transporting ATPase 1 OS=Mus musculus OX=10090 GN=Atp2b1 PE=1 SV=1	0.486955	0	0.00343173	52.823	40.658	52.823					0.486955	0	0.00343173	52.823			S	FRSSLYEGLEKPESRSSIHNFMTHPEFRIED	0	0	0	0	0	0	0	0
G5E829	1140	G5E829	G5E829	Plasma membrane calcium-transporting ATPase 1	Atp2b1	sp|G5E829|AT2B1_MOUSE Plasma membrane calcium-transporting ATPase 1 OS=Mus musculus OX=10090 GN=Atp2b1 PE=1 SV=1	0.486955	0	0.00343173	52.823	40.658	52.823					0.486955	0	0.00343173	52.823			S	RSSLYEGLEKPESRSSIHNFMTHPEFRIEDS	0	0	0	0	0	0	0	0
G5E829	1126	G5E829	G5E829	Plasma membrane calcium-transporting ATPase 1	Atp2b1	sp|G5E829|AT2B1_MOUSE Plasma membrane calcium-transporting ATPase 1 OS=Mus musculus OX=10090 GN=Atp2b1 PE=1 SV=1	0.499996	0	0.0119141	57.136	45.522	57.136	0.499996	0	0.0119141	57.136						1	S	LNRIQTQIRVVNAFRSSLYEGLEKPESRSSI	636.24	2425.7	1243.7	1137	1461	1650.5	1045.7	1377.5
G5E829	1127	G5E829	G5E829	Plasma membrane calcium-transporting ATPase 1	Atp2b1	sp|G5E829|AT2B1_MOUSE Plasma membrane calcium-transporting ATPase 1 OS=Mus musculus OX=10090 GN=Atp2b1 PE=1 SV=1	0.881299	8.70671	0.00020783	113.69	87.748	88.681	0.83583	7.06825	0.00020783	113.69	0.881299	8.70671	0.0007004	88.681		1	S	NRIQTQIRVVNAFRSSLYEGLEKPESRSSIH	1919.4	7437.9	2313.1	3773.4	5906.2	7632.3	3841.7	5228.1
G5E829	1137	G5E829	G5E829	Plasma membrane calcium-transporting ATPase 1	Atp2b1	sp|G5E829|AT2B1_MOUSE Plasma membrane calcium-transporting ATPase 1 OS=Mus musculus OX=10090 GN=Atp2b1 PE=1 SV=1	1	117.002	1.3e-08	120.66	98.653	120.66	0.999925	44.2643	0.00844291	44.294	1	117.002	1.3e-08	120.66		1	S	NAFRSSLYEGLEKPESRSSIHNFMTHPEFRI	449.78	958.25	1516.3	677.4	620.82	669.92	778.74	557.27
G5E870	1024	G5E870	G5E870	E3 ubiquitin-protein ligase TRIP12	Trip12	sp|G5E870|TRIPC_MOUSE E3 ubiquitin-protein ligase TRIP12 OS=Mus musculus OX=10090 GN=Trip12 PE=1 SV=1	0.554155	0.944474	0.0165916	48.948	35.521	48.948	0.554155	0.944474	0.0165916	48.948						1	S	GSPSLQHSRDDSLDLSPQGRLSDVLKRKRLP	387.84	903.64	612.71	507.47	663.13	690.74	580.14	560.19
G5E870	312	G5E870	G5E870	E3 ubiquitin-protein ligase TRIP12	Trip12	sp|G5E870|TRIPC_MOUSE E3 ubiquitin-protein ligase TRIP12 OS=Mus musculus OX=10090 GN=Trip12 PE=1 SV=1	0.98982	19.8981	1.52e-70	225.15	173.71	116.54	0.98982	19.8981	4.83e-09	116.54	0.969332	14.9979	1.52e-70	225.15		1	S	AKLASLRKSTKKRSESPPAELPSLRRSTRQK	1626.4	3124.1	1527.2	1490.4	2392.5	1848.7	1876.4	2083.6
G5E870	1049	G5E870	G5E870	E3 ubiquitin-protein ligase TRIP12	Trip12	sp|G5E870|TRIPC_MOUSE E3 ubiquitin-protein ligase TRIP12 OS=Mus musculus OX=10090 GN=Trip12 PE=1 SV=1	1	41.3476	0.00800354	41.348	32.251	41.348					1	41.3476	0.00800354	41.348		1	S	KRKRLPKRGPRRPKYSPPRDDDKVDNQAKSP	0	0	0	0	0	0	0	0
G5E8K5	958	G5E8K5	G5E8K5	Ankyrin-3	Ank3	sp|G5E8K5|ANK3_MOUSE Ankyrin-3 OS=Mus musculus OX=10090 GN=Ank3 PE=1 SV=1	0.997326	25.716	0.000720973	109.66	84.105	109.66	0.997326	25.716	0.000720973	109.66						1	S	VPSKEQHLTFTREFDSDSLRHYSWAADTLDN	1097.8	2757.9	1800.7	983.13	1303.4	2072.7	848.1	1470.5
G5E8K5	1451	G5E8K5	G5E8K5	Ankyrin-3	Ank3	sp|G5E8K5|ANK3_MOUSE Ankyrin-3 OS=Mus musculus OX=10090 GN=Ank3 PE=1 SV=1	0.999999	58.8388	8.35e-33	189.61	153.37	189.61	0.999968	44.9615	7.09e-06	100.22	0.999999	58.8388	8.35e-33	189.61		1	S	TLPAHKKAEKADRRQSFASLALRKRYSYLTE	892.38	2156.8	1133.2	711.36	986.71	2130.6	963.55	1526.2
G5E8K5	1883	G5E8K5	G5E8K5	Ankyrin-3	Ank3	sp|G5E8K5|ANK3_MOUSE Ankyrin-3 OS=Mus musculus OX=10090 GN=Ank3 PE=1 SV=1	0.942684	12.4681	4.64e-15	141.38	114.59	47.189	0.942684	12.4681	0.0179004	47.189	0.864799	8.05974	4.64e-15	141.38		1	S	LKPKTHGCGRTEEPVSPLTAYQKSLEETSKL	0	0	0	0	0	0	0	0
G5E8K5	606	G5E8K5	G5E8K5	Ankyrin-3	Ank3	sp|G5E8K5|ANK3_MOUSE Ankyrin-3 OS=Mus musculus OX=10090 GN=Ank3 PE=1 SV=1	1	49.4818	0.00130488	49.482	38.377	49.482	1	49.4818	0.00130488	49.482						1	S	YDNQKVALLLLDQGASPHAAAKNGYTPLHIA	340.43	304.33	225.55	112.44	118.53	216.02	87.885	0
H3BKQ3	694	H3BKQ3	H3BKQ3		Evi5l	tr|H3BKQ3|H3BKQ3_MOUSE Ecotropic viral integration site 5 like OS=Mus musculus OX=10090 GN=Evi5l PE=1 SV=2	0.514519	0.291911	8.38e-34	178.51	147.74	178.51	0.514519	0.291911	8.38e-34	178.51						1	S	EIQREEGRIQGQLNHSDSSQYIRELKDQIEE	1187	1996.2	1726.2	1602.8	1151.1	1771	1600.7	1631.9
H3BKQ3	696	H3BKQ3	H3BKQ3		Evi5l	tr|H3BKQ3|H3BKQ3_MOUSE Ecotropic viral integration site 5 like OS=Mus musculus OX=10090 GN=Evi5l PE=1 SV=2	0.984006	18.404	4.76e-90	235.88	182.95	235.88					0.984006	18.404	4.76e-90	235.88		1	S	QREEGRIQGQLNHSDSSQYIRELKDQIEELK	0	0	0	0	0	0	0	0
J3QK46	563	J3QK46	J3QK46		Tmem200c	tr|J3QK46|J3QK46_MOUSE Transmembrane protein 200C OS=Mus musculus OX=10090 GN=Tmem200c PE=1 SV=1	0.875177	8.66541	3.37e-05	107.61	81.068	107.61	0.333333	0	0.0334487	42.001	0.875177	8.66541	3.37e-05	107.61		1	S	SSSNKGYTPLREADTSVESVVDVVAKKRLDC	0	0	0	0	0	0	0	0
J3QK46	566	J3QK46	J3QK46		Tmem200c	tr|J3QK46|J3QK46_MOUSE Transmembrane protein 200C OS=Mus musculus OX=10090 GN=Tmem200c PE=1 SV=1	0.333333	0	0.0334487	42.001	24.137	42.001	0.333333	0	0.0334487	42.001							S	NKGYTPLREADTSVESVVDVVAKKRLDCEDV	0	0	0	0	0	0	0	0
J3QK46	487	J3QK46	J3QK46		Tmem200c	tr|J3QK46|J3QK46_MOUSE Transmembrane protein 200C OS=Mus musculus OX=10090 GN=Tmem200c PE=1 SV=1	0.969711	15.8476	9.33e-05	101.38	63.905	101.38	0.969711	15.8476	9.33e-05	101.38						1	S	GRLPRTRRYAAWRRRSTSGLPDYRAPPSPEP	664.83	1724.1	460.62	851.95	1190.9	1941.5	776.06	1611.4
J3QMK1	1045	J3QMK1	J3QMK1		Sgol2b	tr|J3QMK1|J3QMK1_MOUSE Shugoshin 2B OS=Mus musculus OX=10090 GN=Sgo2b PE=3 SV=1	0.994031	22.1876	0.0297598	40.552	26.835	40.552	0.994031	22.1876	0.0297598	40.552						3	S	PDFCMKVLKPLSQTCSSNIKNSSLDSMCKSS	0	0	0	0	0	0	0	0
J3QMK1	1046	J3QMK1	J3QMK1		Sgol2b	tr|J3QMK1|J3QMK1_MOUSE Shugoshin 2B OS=Mus musculus OX=10090 GN=Sgo2b PE=3 SV=1	0.999684	34.9456	0.0297598	40.552	26.835	40.552	0.999684	34.9456	0.0297598	40.552						3	S	DFCMKVLKPLSQTCSSNIKNSSLDSMCKSSL	0	0	0	0	0	0	0	0
L7N2D8	182	L7N2D8	L7N2D8		Vmn2r71	tr|L7N2D8|L7N2D8_MOUSE Vomeronasal 2
M0QWN7	929	M0QWN7	M0QWN7	Ubiquitin carboxyl-terminal hydrolase	Usp35	tr|M0QWN7|M0QWN7_MOUSE ubiquitinyl hydrolase 1 OS=Mus musculus OX=10090 GN=Usp35 PE=1 SV=1	1	55.8644	0.00146782	55.864	31.071	55.864	1	55.8644	0.00146782	55.864						1	S	FYRQRPREDPAAEPGSPRVRAEPTLHKDLME	248.84	153.49	177.89	345.16	0	88.091	103.73	127.3
M0QWN7	553	M0QWN7	M0QWN7	Ubiquitin carboxyl-terminal hydrolase	Usp35	tr|M0QWN7|M0QWN7_MOUSE ubiquitinyl hydrolase 1 OS=Mus musculus OX=10090 GN=Usp35 PE=1 SV=1	0.987068	20.7806	1.15e-07	95.57	78.69	95.57					0.987068	20.7806	1.15e-07	95.57		1	S	TGMRICQKLKQSSLPSPQEELPSSNATSVEK	0	0	0	0	0	0	0	0
O08528	40	O08528	O08528	Hexokinase-2	Hk2	sp|O08528|HXK2_MOUSE Hexokinase-2 OS=Mus musculus OX=10090 GN=Hk2 PE=1 SV=1	0.60498	2.01232	0.0419923	54.259	12.86	54.259					0.60498	2.01232	0.0419923	54.259		1	S	YLYHMRLSDETLLEISRRFRKEMEKGLGATT	0	0	0	0	0	0	0	0
O08530	351	O08530	O08530	Sphingosine 1-phosphate receptor 1	S1pr1	sp|O08530|S1PR1_MOUSE Sphingosine 1-phosphate receptor 1 OS=Mus musculus OX=10090 GN=S1pr1 PE=1 SV=3	1	98.9421	4.69e-06	98.942	84.066	98.942					1	98.9421	4.69e-06	98.942		1	S	SAGKFKRPIIPGMEFSRSKSDNSSHPQKDDG	0	0	0	0	0	0	0	0
O08539	296	O08539	O08539	Myc box-dependent-interacting protein 1	Bin1	sp|O08539|BIN1_MOUSE Myc box-dependent-interacting protein 1 OS=Mus musculus OX=10090 GN=Bin1 PE=1 SV=1	0.999929	43.9327	4.91e-67	210.9	168.59	56.72	0.999627	38.5026	8.34e-56	204.42	0.999929	43.9327	4.91e-67	210.9		1;2	S	VKAQPSDNAPEKGNKSPSPPPDGSPAATPEI	158.07	986.11	436.9	751.14	673.12	296.19	669.12	359.95
O08539	298	O08539	O08539	Myc box-dependent-interacting protein 1	Bin1	sp|O08539|BIN1_MOUSE Myc box-dependent-interacting protein 1 OS=Mus musculus OX=10090 GN=Bin1 PE=1 SV=1	0.999273	33.9475	3.43e-149	269.08	239.73	42.454	0.999273	33.9475	3.65e-132	264.44	0.999101	33.3264	3.43e-149	269.08		1;2	S	AQPSDNAPEKGNKSPSPPPDGSPAATPEIRV	21420	41444	33533	25945	28620	29393	26580	25524
O08539	304	O08539	O08539	Myc box-dependent-interacting protein 1	Bin1	sp|O08539|BIN1_MOUSE Myc box-dependent-interacting protein 1 OS=Mus musculus OX=10090 GN=Bin1 PE=1 SV=1	0.999995	53.0096	5.19e-130	263.59	232.59	204.42	0.999995	53.0096	9.81e-111	244.05	0.99999	50.0354	5.19e-130	263.59		1;2	S	APEKGNKSPSPPPDGSPAATPEIRVNHEPEP	2759	5747.8	3181.6	3246.1	2505.4	3719.5	2542.3	2564.6
O08539	276	O08539	O08539	Myc box-dependent-interacting protein 1	Bin1	sp|O08539|BIN1_MOUSE Myc box-dependent-interacting protein 1 OS=Mus musculus OX=10090 GN=Bin1 PE=1 SV=1	0.990229	20.1179	0.000468721	88.187	64.336	88.187	0.990229	20.1179	0.000468721	88.187						1	S	QNLNDVLVSLEKQHGSNTFTVKAQPSDNAPE	956.56	2105.3	796.77	1393.1	649.05	1382.3	824.2	1524.9
O08539	321	O08539	O08539	Myc box-dependent-interacting protein 1	Bin1	sp|O08539|BIN1_MOUSE Myc box-dependent-interacting protein 1 OS=Mus musculus OX=10090 GN=Bin1 PE=1 SV=1	0.570754	1.28456	0.00063645	57.499	44.146	57.499	0.570754	1.28456	0.00063645	57.499						1	S	AATPEIRVNHEPEPASGASPGATIPKSPSQL	687.04	1089.6	627.51	609.28	357.66	726.39	395.54	485.96
O08539	324	O08539	O08539	Myc box-dependent-interacting protein 1	Bin1	sp|O08539|BIN1_MOUSE Myc box-dependent-interacting protein 1 OS=Mus musculus OX=10090 GN=Bin1 PE=1 SV=1	0.999995	53.342	3.57e-86	217.26	202.1	217.26	0.999893	40.0369	1.72e-16	144.56	0.999995	53.342	3.57e-86	217.26		1	S	PEIRVNHEPEPASGASPGATIPKSPSQLRKG	1350.3	3358.7	1987.7	1471.6	1375	1741.2	1552.8	1765.3
O08547	174	O08547	O08547	Vesicle-trafficking protein SEC22b	Sec22b	sp|O08547|SC22B_MOUSE Vesicle-trafficking protein SEC22b OS=Mus musculus OX=10090 GN=Sec22b PE=1 SV=3	0.495959	0	0.0394204	42.718	23.105	42.718	0.495959	0	0.0394204	42.718							S	RGEALSALDSKANNLSSLSKKYRQDAKYLNM	0	0	0	0	0	0	0	0
O08547	175	O08547	O08547	Vesicle-trafficking protein SEC22b	Sec22b	sp|O08547|SC22B_MOUSE Vesicle-trafficking protein SEC22b OS=Mus musculus OX=10090 GN=Sec22b PE=1 SV=3	0.495959	0	0.0394204	42.718	23.105	42.718	0.495959	0	0.0394204	42.718							S	GEALSALDSKANNLSSLSKKYRQDAKYLNMR	0	0	0	0	0	0	0	0
O08547	177	O08547	O08547	Vesicle-trafficking protein SEC22b	Sec22b	sp|O08547|SC22B_MOUSE Vesicle-trafficking protein SEC22b OS=Mus musculus OX=10090 GN=Sec22b PE=1 SV=3	0.999845	38.2528	1.63e-06	135.99	90.619	135.99	0.999845	38.2528	1.63e-06	135.99	0.997869	27.6679	4.25e-05	98.156		1	S	ALSALDSKANNLSSLSKKYRQDAKYLNMRST	4377.6	5502.8	691.65	6022.6	4665.2	5841.3	4774.2	6585.9
O08547	137	O08547	O08547	Vesicle-trafficking protein SEC22b	Sec22b	sp|O08547|SC22B_MOUSE Vesicle-trafficking protein SEC22b OS=Mus musculus OX=10090 GN=Sec22b PE=1 SV=3	0.999605	34.0334	1.61e-22	148.03	122.58	147.56	0.999605	34.0334	1.69e-22	147.56	0.999431	32.4449	1.61e-22	148.03		1	S	TKKLYIDSRARRNLGSINTELQDVQRIMVAN	3644.9	5251.1	2634	3542.9	2185.6	3236.1	2415.6	3202.5
O08553	507	O08553	O08553	Dihydropyrimidinase-related protein 2	Dpysl2	sp|O08553|DPYL2_MOUSE Dihydropyrimidinase-related protein 2 OS=Mus musculus OX=10090 GN=Dpysl2 PE=1 SV=2	0.832587	6.9664	8.87e-05	103.7	80.324	103.7					0.832587	6.9664	8.87e-05	103.7		1	S	RGVPRGLYDGPVCEVSVTPKTVTPASSAKTS	0	0	0	0	0	0	0	0
O08553	292	O08553	O08553	Dihydropyrimidinase-related protein 2	Dpysl2	sp|O08553|DPYL2_MOUSE Dihydropyrimidinase-related protein 2 OS=Mus musculus OX=10090 GN=Dpysl2 PE=1 SV=2	0.649687	6.4885	0.00056961	45.332	36.235	45.332					0.649687	6.4885	0.00056961	45.332		1	S	EPITASLGTDGSHYWSKNWAKAAAFVTSPPL	0	0	0	0	0	0	0	0
O08553;Q62188	14;14	O08553;Q62188	O08553	Dihydropyrimidinase-related protein 2;Dihydropyrimidinase-related protein 3	Dpysl2;Dpysl3	sp|O08553|DPYL2_MOUSE Dihydropyrimidinase-related protein 2 OS=Mus musculus OX=10090 GN=Dpysl2 PE=1 SV=2;sp|Q62188|DPYL3_MOUSE Dihydropyrimidinase-related protein 3 OS=Mus musculus OX=10090 GN=Dpysl3 PE=1 SV=1	0.984476	18.0221	0.00897473	71.349	53.314	71.349	0.5	0	0.00997065	51.727	0.984476	18.0221	0.00897473	71.349		1	S	__MSYQGKKNIPRITSDRLLIKGGKIVNDDQ;__MSYQGKKNIPRITSDRLLIKGGRIVNDDQ	1390.1	1887.3	1241.2	1309.3	1229.3	1503.1	1109	1522.4
O08553	540	O08553	O08553	Dihydropyrimidinase-related protein 2	Dpysl2	sp|O08553|DPYL2_MOUSE Dihydropyrimidinase-related protein 2 OS=Mus musculus OX=10090 GN=Dpysl2 PE=1 SV=2	0.997611	26.2258	3.63e-94	222.46	206.64	159.7	0.783637	5.59068	3.63e-94	222.46	0.997611	26.2258	3.59e-31	162.11		1	S	KQQAPPVRNLHQSGFSLSGAQIDDNIPRRTT	4863.8	11852	2957.6	6941.2	2995.1	6458.1	1833.3	3898.9
O08553	542	O08553	O08553	Dihydropyrimidinase-related protein 2	Dpysl2	sp|O08553|DPYL2_MOUSE Dihydropyrimidinase-related protein 2 OS=Mus musculus OX=10090 GN=Dpysl2 PE=1 SV=2	0.997259	25.6092	5.69e-160	270.49	245.59	270.49	0.997259	25.6092	5.69e-160	270.49	0.99321	21.6517	3.65e-66	194.49		1	S	QAPPVRNLHQSGFSLSGAQIDDNIPRRTTQR	6061.7	20555	4111.9	10890	4294.9	9326	2395.4	6670.7
O08553	522	O08553	O08553	Dihydropyrimidinase-related protein 2	Dpysl2	sp|O08553|DPYL2_MOUSE Dihydropyrimidinase-related protein 2 OS=Mus musculus OX=10090 GN=Dpysl2 PE=1 SV=2	0.832107	6.95147	0.00386765	59.198	44.423	59.198	0.832107	6.95147	0.00386765	59.198	0.736634	5.52651	0.0212025	53.3		1;2	S	SVTPKTVTPASSAKTSPAKQQAPPVRNLHQS	11244	3763	39197	1348.6	7930.2	836.89	11616	1010
O08553	517	O08553	O08553	Dihydropyrimidinase-related protein 2	Dpysl2	sp|O08553|DPYL2_MOUSE Dihydropyrimidinase-related protein 2 OS=Mus musculus OX=10090 GN=Dpysl2 PE=1 SV=2	0.566547	3.57942	0.00169507	74.133	49.841	66.393					0.566547	3.57942	0.00169507	74.133		2	S	PVCEVSVTPKTVTPASSAKTSPAKQQAPPVR	0	0	0	0	0	0	0	0
O08553	518	O08553	O08553	Dihydropyrimidinase-related protein 2	Dpysl2	sp|O08553|DPYL2_MOUSE Dihydropyrimidinase-related protein 2 OS=Mus musculus OX=10090 GN=Dpysl2 PE=1 SV=2	0.811758	7.24438	0.00169507	74.133	49.841	52.862	0.811758	7.24438	0.0029664	52.862	0.800151	7.4124	0.00169507	74.133		2	S	VCEVSVTPKTVTPASSAKTSPAKQQAPPVRN	0	0	0	0	0	0	0	0
O08576	366	O08576	O08576	RUN domain-containing protein 3A	Rundc3a	sp|O08576|RUN3A_MOUSE RUN domain-containing protein 3A OS=Mus musculus OX=10090 GN=Rundc3a PE=1 SV=1	0.998214	27.594	4.51e-54	190.83	174.74	190.83					0.998214	27.594	4.51e-54	190.83		1	S	HRPEGASNSKLYRRHSFMSTEPLSAEASLSS	0	0	0	0	0	0	0	0
O08576	369	O08576	O08576	RUN domain-containing protein 3A	Rundc3a	sp|O08576|RUN3A_MOUSE RUN domain-containing protein 3A OS=Mus musculus OX=10090 GN=Rundc3a PE=1 SV=1	0.33303	0	0.00015078	58.487	37.534	58.487					0.33303	0	0.00015078	58.487			S	EGASNSKLYRRHSFMSTEPLSAEASLSSDSQ	0	0	0	0	0	0	0	0
O08576	436	O08576	O08576	RUN domain-containing protein 3A	Rundc3a	sp|O08576|RUN3A_MOUSE RUN domain-containing protein 3A OS=Mus musculus OX=10090 GN=Rundc3a PE=1 SV=1	0.44244	0	0.00108886	51.875	38.447	51.875	0.44244	0	0.00108886	51.875							S	KSLASFKSNECLVSDSPEGSPALSPS_____	0	0	0	0	0	0	0	0
O08576	440	O08576	O08576	RUN domain-containing protein 3A	Rundc3a	sp|O08576|RUN3A_MOUSE RUN domain-containing protein 3A OS=Mus musculus OX=10090 GN=Rundc3a PE=1 SV=1	0.44244	0	0.00108886	51.875	38.447	51.875	0.44244	0	0.00108886	51.875							S	SFKSNECLVSDSPEGSPALSPS_________	0	0	0	0	0	0	0	0
O08576	444	O08576	O08576	RUN domain-containing protein 3A	Rundc3a	sp|O08576|RUN3A_MOUSE RUN domain-containing protein 3A OS=Mus musculus OX=10090 GN=Rundc3a PE=1 SV=1	0.930278	11.5422	5.38e-05	80.603	70.407	73.707	0.930278	11.5422	9.84e-05	73.707	0.915646	10.368	5.38e-05	80.603		1	S	NECLVSDSPEGSPALSPS_____________	86.541	273.09	124.54	213.43	178.68	193.39	80.335	0
O08579	88	O08579	O08579	Emerin	Emd	sp|O08579|EMD_MOUSE Emerin OS=Mus musculus OX=10090 GN=Emd PE=1 SV=1	1	44.5108	0.0140474	44.511	30.832	44.511	1	44.5108	0.0140474	44.511						1	S	DMYDLPKKEDALLYQSKDYNDDYYEESYLTT	834.99	840.67	298.89	513.34	415.62	618.42	288.25	467.54
O08581	324	O08581	O08581	Potassium channel subfamily K member 1	Kcnk1	sp|O08581|KCNK1_MOUSE Potassium channel subfamily K member 1 OS=Mus musculus OX=10090 GN=Kcnk1 PE=1 SV=2	0.49654	0	0.000248284	61.375	53.464	61.375	0.49654	0	0.000248284	61.375							S	AGLKEEQKQSEPFVASQSPPYEDGSADH___	0	0	0	0	0	0	0	0
O08581	326	O08581	O08581	Potassium channel subfamily K member 1	Kcnk1	sp|O08581|KCNK1_MOUSE Potassium channel subfamily K member 1 OS=Mus musculus OX=10090 GN=Kcnk1 PE=1 SV=2	0.999664	34.7498	1.19e-52	185.86	173.99	185.86	0.999664	34.7498	1.19e-52	185.86						1	S	LKEEQKQSEPFVASQSPPYEDGSADH_____	2650.3	3063.3	2548.9	2204.3	1843.3	2859.4	1973.6	2626.7
O08582	580	O08582	O08582	GTP-binding protein 1	Gtpbp1	sp|O08582|GTPB1_MOUSE GTP-binding protein 1 OS=Mus musculus OX=10090 GN=Gtpbp1 PE=1 SV=2	0.997521	29.3172	3.43e-07	110.44	81.674	83	0.989038	22.1663	0.00051093	82.437	0.997521	29.3172	3.43e-07	110.44		1	S	KAVGTITKLLQTTNNSPMNSKPQQIKMQSTK	10029	13573	7203.1	11520	7748.7	12120	7421.7	9958.8
O08582	69	O08582	O08582	GTP-binding protein 1	Gtpbp1	sp|O08582|GTPB1_MOUSE GTP-binding protein 1 OS=Mus musculus OX=10090 GN=Gtpbp1 PE=1 SV=2	0.697871	6.71484	0.000538794	74.678	53.725	74.678					0.697871	6.71484	0.000538794	74.678		1	S	NGEPELDLTSKLVLVSPTSEQYDSLLRQMWE	0	0	0	0	0	0	0	0
O08582	72	O08582	O08582	GTP-binding protein 1	Gtpbp1	sp|O08582|GTPB1_MOUSE GTP-binding protein 1 OS=Mus musculus OX=10090 GN=Gtpbp1 PE=1 SV=2	0.34735	0	0.00418735	57.804	38.481	57.804	0.34735	0	0.00418735	57.804							S	PELDLTSKLVLVSPTSEQYDSLLRQMWERMD	0	0	0	0	0	0	0	0
O08582	8	O08582	O08582	GTP-binding protein 1	Gtpbp1	sp|O08582|GTPB1_MOUSE GTP-binding protein 1 OS=Mus musculus OX=10090 GN=Gtpbp1 PE=1 SV=2	0.720327	6.207	7.05e-18	133.38	123.5	133.38	0.720327	6.207	7.05e-18	133.38	0.707825	5.83792	4.78e-15	120.97		2	S	________MAAERSRSPVDSPVPASMFAPEP	0	0	0	0	0	0	0	0
O08582	12	O08582	O08582	GTP-binding protein 1	Gtpbp1	sp|O08582|GTPB1_MOUSE GTP-binding protein 1 OS=Mus musculus OX=10090 GN=Gtpbp1 PE=1 SV=2	0.627712	4.83735	4e-06	64.508	53.897	64.508	0.452273	1.8746	0.00174501	45.748	0.627712	4.83735	4e-06	64.508		2	S	____MAAERSRSPVDSPVPASMFAPEPSSPG	0	0	0	0	0	0	0	0
O08582	24	O08582	O08582	GTP-binding protein 1	Gtpbp1	sp|O08582|GTPB1_MOUSE GTP-binding protein 1 OS=Mus musculus OX=10090 GN=Gtpbp1 PE=1 SV=2	0.560169	1.18231	7.05e-18	133.38	123.5	60.971	0.549713	0.871705	7.05e-18	133.38	0.560169	1.18231	6.93e-09	88.395		2	S	PVDSPVPASMFAPEPSSPGAARAAAAAARLH	0	0	0	0	0	0	0	0
O08582	25	O08582	O08582	GTP-binding protein 1	Gtpbp1	sp|O08582|GTPB1_MOUSE GTP-binding protein 1 OS=Mus musculus OX=10090 GN=Gtpbp1 PE=1 SV=2	0.941853	12.1247	4.78e-15	120.97	111.09	120.97					0.941853	12.1247	4.78e-15	120.97		1;2	S	VDSPVPASMFAPEPSSPGAARAAAAAARLHG	0	0	0	0	0	0	0	0
O08582	6	O08582	O08582	GTP-binding protein 1	Gtpbp1	sp|O08582|GTPB1_MOUSE GTP-binding protein 1 OS=Mus musculus OX=10090 GN=Gtpbp1 PE=1 SV=2	0.538641	1.23919	1.28e-20	134.64	120.33	98.009	0.480416	0.59401	1.28e-20	134.64	0.538641	1.23919	2.45e-12	98.009		1	S	__________MAAERSRSPVDSPVPASMFAP	0	0	0	0	0	0	0	0
O08583	237	O08583	O08583	THO complex subunit 4	Alyref	sp|O08583|THOC4_MOUSE THO complex subunit 4 OS=Mus musculus OX=10090 GN=Alyref PE=1 SV=3	1	50.0792	6.02e-07	111.92	94.846	50.079	1	50.0792	0.0016233	50.079	1	111.925	6.02e-07	111.92		1	S	RGRGRGTGRNSKQQLSAEELDAQLDAYNARM	519.94	578.87	127.78	414.13	322.88	527.37	484.41	645.56
O08585	104	O08585	O08585	Clathrin light chain A	Clta	sp|O08585|CLCA_MOUSE Clathrin light chain A OS=Mus musculus OX=10090 GN=Clta PE=1 SV=2	0.968843	14.927	0.0163003	42.789	22.125	42.789	0.968843	14.927	0.0163003	42.789						1	S	PTDSYAAISEVDRLQSEPESIRKWREEQTER	562.75	2241.2	439.5	650.53	2294	863.19	1085.1	977.97
O08599	328	O08599	O08599	Syntaxin-binding protein 1	Stxbp1	sp|O08599|STXB1_MOUSE Syntaxin-binding protein 1 OS=Mus musculus OX=10090 GN=Stxbp1 PE=1 SV=2	1	56.2581	0.0278648	56.258	6.2178	56.258					1	56.2581	0.0278648	56.258		1	S	SKRMNTGEKTTMRDLSQMLKKMPQYQKELSK	0	0	0	0	0	0	0	0
O08599	594	O08599	O08599	Syntaxin-binding protein 1	Stxbp1	sp|O08599|STXB1_MOUSE Syntaxin-binding protein 1 OS=Mus musculus OX=10090 GN=Stxbp1 PE=1 SV=2	0.892949	9.21285	0.0112808	67.385	57.333	67.385	0.672654	3.12875	0.0206197	60.08	0.892949	9.21285	0.0112808	67.385		1	S	LDTLKKLNKTDEEISS_______________	5961.1	10526	110060	2603.5	8622.1	0	3304.1	3649.2
O08599	506	O08599	O08599	Syntaxin-binding protein 1	Stxbp1	sp|O08599|STXB1_MOUSE Syntaxin-binding protein 1 OS=Mus musculus OX=10090 GN=Stxbp1 PE=1 SV=2	0.868351	8.37541	3.83e-87	237.07	201.08	237.07	0.868351	8.37541	3.83e-87	237.07						1	S	EDKLDTKHYPYISTRSSASFSTTAVSARYGH	4703.2	5686	6044.5	2052.3	3613.1	3848.4	2507.2	5140.7
O08599	509	O08599	O08599	Syntaxin-binding protein 1	Stxbp1	sp|O08599|STXB1_MOUSE Syntaxin-binding protein 1 OS=Mus musculus OX=10090 GN=Stxbp1 PE=1 SV=2	0.942964	16.7931	2.42e-72	228.02	188.23	214.58	0.838437	7.53829	1.09e-71	225.44	0.942964	16.7931	2.42e-72	228.02		1	S	LDTKHYPYISTRSSASFSTTAVSARYGHWHK	7235.1	20756	6687.7	13299	6302.2	11295	4473.8	11441
O08599	511	O08599	O08599	Syntaxin-binding protein 1	Stxbp1	sp|O08599|STXB1_MOUSE Syntaxin-binding protein 1 OS=Mus musculus OX=10090 GN=Stxbp1 PE=1 SV=2	0.559913	2.03121	2.42e-72	228.02	188.23	140.45	0.559913	2.03121	5.68e-15	140.45	0.471549	0	2.42e-72	228.02		1	S	TKHYPYISTRSSASFSTTAVSARYGHWHKNK	7483.2	11638	8289.3	5593.6	7827.4	6865.6	7180	12740
O08599	516	O08599	O08599	Syntaxin-binding protein 1	Stxbp1	sp|O08599|STXB1_MOUSE Syntaxin-binding protein 1 OS=Mus musculus OX=10090 GN=Stxbp1 PE=1 SV=2	1	80.2531	2.91e-181	255.16	215.98	255.16	1	80.2531	2.91e-181	255.16	1	75.8161	1.42e-71	224.43		1	S	YISTRSSASFSTTAVSARYGHWHKNKAPGEY	1125.5	1430.8	737	773.25	1080.8	673.84	1060.4	1572.4
O08648	1240	O08648	O08648	Mitogen-activated protein kinase kinase kinase 4	Map3k4	sp|O08648|M3K4_MOUSE Mitogen-activated protein kinase kinase kinase 4 OS=Mus musculus OX=10090 GN=Map3k4 PE=1 SV=2	0.495527	0	0.000436459	63.918	52.638	47.568	0.461813	0.226791	0.000436459	63.918	0.495527	0	0.00315342	47.568			S	ASIAAELQFRSLSRHSSPTEERDEPAYPRSD	0	0	0	0	0	0	0	0
O08648	1241	O08648	O08648	Mitogen-activated protein kinase kinase kinase 4	Map3k4	sp|O08648|M3K4_MOUSE Mitogen-activated protein kinase kinase kinase 4 OS=Mus musculus OX=10090 GN=Map3k4 PE=1 SV=2	0.495527	0	0.00315342	47.568	37.229	47.568					0.495527	0	0.00315342	47.568			S	SIAAELQFRSLSRHSSPTEERDEPAYPRSDS	0	0	0	0	0	0	0	0
O08688	538	O08688	O08688	Calpain-5	Capn5	sp|O08688|CAN5_MOUSE Calpain-5 OS=Mus musculus OX=10090 GN=Capn5 PE=1 SV=1	0.996515	27.5727	0.0133105	52.79	22.983	52.79	0.996515	27.5727	0.0133105	52.79						1	S	VLGAAGLKDSPTGANSYVIIKCEGEKVRSAV	0	0	0	0	0	0	0	0
O08709	194	O08709	O08709	Peroxiredoxin-6	Prdx6	sp|O08709|PRDX6_MOUSE Peroxiredoxin-6 OS=Mus musculus OX=10090 GN=Prdx6 PE=1 SV=3	0.796424	5.93675	0.00185745	47.808	36.537	47.808					0.796424	5.93675	0.00185745	47.808		1	S	VDWKKGESVMVVPTLSEEEAKQCFPKGVFTK	0	0	0	0	0	0	0	0
O08715	101	O08715	O08715	A-kinase anchor protein 1
O08715	103	O08715	O08715	A-kinase anchor protein 1
O08739	83	O08739	O08739	AMP deaminase 3	Ampd3	sp|O08739|AMPD3_MOUSE AMP deaminase 3 OS=Mus musculus OX=10090 GN=Ampd3 PE=1 SV=2	0.458586	0	0.000645905	71.344	50.963	71.344					0.458586	0	0.000645905	71.344			S	SVETAKRKKSFKMIRSQSLSLQMPTQQDWKG	0	0	0	0	0	0	0	0
O08739	85	O08739	O08739	AMP deaminase 3	Ampd3	sp|O08739|AMPD3_MOUSE AMP deaminase 3 OS=Mus musculus OX=10090 GN=Ampd3 PE=1 SV=2	0.458586	0	0.000645905	71.344	50.963	71.344					0.458586	0	0.000645905	71.344			S	ETAKRKKSFKMIRSQSLSLQMPTQQDWKGPP	0	0	0	0	0	0	0	0
O08759	8	O08759	O08759	Ubiquitin-protein ligase E3A	Ube3a	sp|O08759|UBE3A_MOUSE Ubiquitin-protein ligase E3A OS=Mus musculus OX=10090 GN=Ube3a PE=1 SV=2	0.999912	40.6121	3.21e-05	106.01	85.626	106.01	0.999912	40.6121	3.21e-05	106.01						1	S	________MATACKRSPGESQSEDIEASRMK	696.63	1151.2	729.73	843.1	610.79	696.34	644.28	900.45
O08784	1191	O08784	O08784	Treacle protein	Tcof1	sp|O08784|TCOF_MOUSE Treacle protein OS=Mus musculus OX=10090 GN=Tcof1 PE=1 SV=1	1	110.293	5.4e-08	110.29	78.654	110.29					1	110.293	5.4e-08	110.29		1	S	EAIKESGKKSQKRKLSGDLEAGAPKNKKKKE	0	0	0	0	0	0	0	0
O08784	852	O08784	O08784	Treacle protein	Tcof1	sp|O08784|TCOF_MOUSE Treacle protein OS=Mus musculus OX=10090 GN=Tcof1 PE=1 SV=1	0.602416	1.80485	1.4e-13	132.84	87.512	132.84	0.558746	1.02842	3.12e-07	91.589	0.602416	1.80485	1.4e-13	132.84		1	S	SAQAIKSPPVSVNRNSSPAVPAPTPEGVQAV	1440.9	2345.9	1093	1516.9	1773.7	1354	1276.1	1851.9
O08784	853	O08784	O08784	Treacle protein	Tcof1	sp|O08784|TCOF_MOUSE Treacle protein OS=Mus musculus OX=10090 GN=Tcof1 PE=1 SV=1	0.976676	16.2628	9.82e-17	138.75	111.41	138.75	0.499922	0	3.12e-07	91.589	0.976676	16.2628	9.82e-17	138.75		1	S	AQAIKSPPVSVNRNSSPAVPAPTPEGVQAVN	609.05	1031.4	449.83	470.08	788.6	678.24	404.47	723.79
O08784	169	O08784	O08784	Treacle protein	Tcof1	sp|O08784|TCOF_MOUSE Treacle protein OS=Mus musculus OX=10090 GN=Tcof1 PE=1 SV=1	0.499706	0	6.02e-10	80.02	72.487	80.02	0.499417	0	5e-09	73.109	0.499706	0	6.02e-10	80.02			S	SPKKSAEPLANTVLASETEEEGNAQALGPTA	0	0	0	0	0	0	0	0
O08784	1126	O08784	O08784	Treacle protein	Tcof1	sp|O08784|TCOF_MOUSE Treacle protein OS=Mus musculus OX=10090 GN=Tcof1 PE=1 SV=1	0.953155	14.8535	1.86e-05	88.133	73.161	88.133	0.953155	14.8535	1.86e-05	88.133						1	S	SGSTPQKPKKLKKSTSSSPAPTQTLPNSITQ	383.47	515.32	250.17	559.4	218.49	644.48	221.76	609.63
O08784	1128	O08784	O08784	Treacle protein	Tcof1	sp|O08784|TCOF_MOUSE Treacle protein OS=Mus musculus OX=10090 GN=Tcof1 PE=1 SV=1	0.975427	16.8217	8.67e-11	130.29	113.27	130.29	0.975427	16.8217	8.67e-11	130.29	0.887032	10.0313	5.97e-05	79.633		1	S	STPQKPKKLKKSTSSSPAPTQTLPNSITQRL	693.55	1011.8	688.99	793.6	658.01	707.78	872.71	744.53
O08786	293	O08786	O08786	Cholecystokinin receptor type A	Cckar	sp|O08786|CCKAR_MOUSE Cholecystokinin receptor type A OS=Mus musculus OX=10090 GN=Cckar PE=1 SV=1	0.244059	0	0.0371702	47.666	34.238	47.666					0.244059	0	0.0371702	47.666			S	LQKSRPPRKLELQQLSTSSSGGRINRIRSSG	0	0	0	0	0	0	0	0
O08786	295	O08786	O08786	Cholecystokinin receptor type A	Cckar	sp|O08786|CCKAR_MOUSE Cholecystokinin receptor type A OS=Mus musculus OX=10090 GN=Cckar PE=1 SV=1	0.244059	0	0.0371702	47.666	34.238	47.666					0.244059	0	0.0371702	47.666			S	KSRPPRKLELQQLSTSSSGGRINRIRSSGSA	0	0	0	0	0	0	0	0
O08786	296	O08786	O08786	Cholecystokinin receptor type A	Cckar	sp|O08786|CCKAR_MOUSE Cholecystokinin receptor type A OS=Mus musculus OX=10090 GN=Cckar PE=1 SV=1	0.244059	0	0.0371702	47.666	34.238	47.666					0.244059	0	0.0371702	47.666			S	SRPPRKLELQQLSTSSSGGRINRIRSSGSAA	0	0	0	0	0	0	0	0
O08788	105	O08788	O08788	Dynactin subunit 1	Dctn1	sp|O08788|DCTN1_MOUSE Dynactin subunit 1 OS=Mus musculus OX=10090 GN=Dctn1 PE=1 SV=3	0.968311	15.0014	9.49e-35	166.28	152.17	166.28	0.617638	2.22668	2.93e-34	160.05	0.968311	15.0014	9.49e-35	166.28		1	S	RQSQIQVFEDGADTTSPETPDSSASKVLKRE	4199.3	6134.3	5189.2	3645.1	4480.6	5058.3	5055.2	5268.2
O08917	383	O08917	O08917	Flotillin-1	Flot1	sp|O08917|FLOT1_MOUSE Flotillin-1 OS=Mus musculus OX=10090 GN=Flot1 PE=1 SV=1	0.605747	6.05099	0.00211899	56.569	34.421	56.404	0.605747	6.05099	0.00211899	56.569						1	S	ISGPLTSANKITLVSSGSGTMGAAKVTGEVL	611.67	624.91	587.58	717.53	647.87	514.11	603.66	880.68
O08917	385	O08917	O08917	Flotillin-1	Flot1	sp|O08917|FLOT1_MOUSE Flotillin-1 OS=Mus musculus OX=10090 GN=Flot1 PE=1 SV=1	0.572443	2.47694	0.0003978	90.759	66.467	90.759	0.313488	0	0.00211899	56.569	0.572443	2.47694	0.0003978	90.759		1	S	GPLTSANKITLVSSGSGTMGAAKVTGEVLDI	0	0	0	0	0	0	0	0
O08919	263	O08919	O08919	Numb-like protein	Numbl	sp|O08919|NUMBL_MOUSE Numb-like protein OS=Mus musculus OX=10090 GN=Numbl PE=1 SV=3	0.992146	25.6036	6.51e-28	122.43	89.719	111.75	0.992146	25.6036	5.6e-22	111.75	0.950119	12.8395	6.51e-28	122.43		2	S	AAPAVAPGPAQPGHVSPTPATTSPGEKGEAG	0	0	0	0	0	0	0	0
O08919	270	O08919	O08919	Numb-like protein	Numbl	sp|O08919|NUMBL_MOUSE Numb-like protein OS=Mus musculus OX=10090 GN=Numbl PE=1 SV=3	0.767829	6.17914	8.28e-33	142.72	128.63	102.78	0.767829	6.17914	1.56e-31	135.82	0.742278	5.34264	8.28e-33	142.72		1;2	S	GPAQPGHVSPTPATTSPGEKGEAGTPVAAGT	3171.1	4003.4	160.84	1524.4	3142.9	2925.6	1649.2	2074.1
O08919;Q9QZS3	305;276	O08919;Q9QZS3	O08919	Numb-like protein;Protein numb homolog	Numbl;Numb	sp|O08919|NUMBL_MOUSE Numb-like protein OS=Mus musculus OX=10090 GN=Numbl PE=1 SV=3;sp|Q9QZS3|NUMB_MOUSE Protein numb homolog OS=Mus musculus OX=10090 GN=Numb PE=1 SV=1	0.999996	54.0984	0.000514742	70.783	45.136	70.783					0.999996	54.0984	0.000514742	70.783		1	S	IPRRHAPIEQLARQGSFRGFPALSQKMSPFK;IPRRHAPLEQLVRQGSFRGFPALSQKNSPFK	0	0	0	0	0	0	0	0
O08919	324	O08919	O08919	Numb-like protein	Numbl	sp|O08919|NUMBL_MOUSE Numb-like protein OS=Mus musculus OX=10090 GN=Numbl PE=1 SV=3	1	69.308	0.000243659	82.482	63.159	82.482	1	69.308	0.000243659	82.482						1	S	FPALSQKNSPFKRQLSLRLNELPSTLQRRTD	1414.4	851.78	1277.6	2013.3	151.01	704.68	237.6	1484.3
O09000	847	O09000	O09000	Nuclear receptor coactivator 3	Ncoa3	sp|O09000|NCOA3_MOUSE Nuclear receptor coactivator 3 OS=Mus musculus OX=10090 GN=Ncoa3 PE=1 SV=2	0.999579	33.7645	7.28e-05	98.439	83.173	98.439					0.999579	33.7645	7.28e-05	98.439		1	S	PQPVQSVRPPYNRAVSLDSPVSVGSGPPVKN	0	0	0	0	0	0	0	0
O09044	110	O09044	O09044	Synaptosomal-associated protein 23	Snap23	sp|O09044|SNP23_MOUSE Synaptosomal-associated protein 23 OS=Mus musculus OX=10090 GN=Snap23 PE=1 SV=1	0.999647	34.522	3.01e-195	295.98	267.43	199.33	0.996134	24.1603	3.01e-195	295.98	0.999647	34.522	4.3e-56	199.33		1	S	SGKNYKATWGDGGDNSPSNVVSKQPSRITNG	6511.1	9209.1	7352.5	8172.7	5959.6	7313.2	6658.9	7555.6
O09126	782	O09126	O09126	Semaphorin-4D	Sema4d	sp|O09126|SEM4D_MOUSE Semaphorin-4D OS=Mus musculus OX=10090 GN=Sema4d PE=1 SV=2	0.999307	31.8848	5.6e-18	162.32	117.24	162.32	0.982133	17.4045	0.000575787	85.845	0.999307	31.8848	5.6e-18	162.32		1	S	RSALLLGKKTPKSDFSDLEQSVKETLVEPGS	1630.1	1915.9	755.6	1777.6	1897.2	1442.6	1392.2	1366.1
O09126	787	O09126	O09126	Semaphorin-4D	Sema4d	sp|O09126|SEM4D_MOUSE Semaphorin-4D OS=Mus musculus OX=10090 GN=Sema4d PE=1 SV=2	1	76.1827	9.4e-09	114.82	92.619	114.82					1	76.1827	9.4e-09	114.82		1	S	LGKKTPKSDFSDLEQSVKETLVEPGSFSQQN	0	0	0	0	0	0	0	0
O09126	832	O09126	O09126	Semaphorin-4D	Sema4d	sp|O09126|SEM4D_MOUSE Semaphorin-4D OS=Mus musculus OX=10090 GN=Sema4d PE=1 SV=2	0.99987	39.6606	2.39e-05	104.18	77.343	104.18					0.99987	39.6606	2.39e-05	104.18		1	S	EQDTITSKVPTDREDSQRIDELSARDKPFDV	0	0	0	0	0	0	0	0
O09172	59	O09172	O09172	Glutamate--cysteine ligase regulatory subunit	Gclm	sp|O09172|GSH0_MOUSE Glutamate--cysteine ligase regulatory subunit OS=Mus musculus OX=10090 GN=Gclm PE=1 SV=1	0.969482	18.0305	0.000562283	74.678	61.698	74.678					0.969482	18.0305	0.000562283	74.678		1	S	RDCIQKTLNEWSSQISPDLVREFPDVLECTM	0	0	0	0	0	0	0	0
O35098	14	O35098	O35098	Dihydropyrimidinase-related protein 4	Dpysl4	sp|O35098|DPYL4_MOUSE Dihydropyrimidinase-related protein 4 OS=Mus musculus OX=10090 GN=Dpysl4 PE=1 SV=1	0.984476	18.0221	0.00897473	71.349	53.314	71.349	0.5	0	0.00997065	51.727	0.984476	18.0221	0.00897473	71.349		1	S	__MSFQGKKSIPRITSDRLLIKGGKIVNDDQ	1390.1	1887.3	1241.2	1309.3	1229.3	1503.1	1109	1522.4
O35098	542	O35098	O35098	Dihydropyrimidinase-related protein 4	Dpysl4	sp|O35098|DPYL4_MOUSE Dihydropyrimidinase-related protein 4 OS=Mus musculus OX=10090 GN=Dpysl4 PE=1 SV=1	0.78819	6.6417	2.01e-05	77.693	61.009	77.693	0.448281	0	6.93e-05	67.413	0.78819	6.6417	2.01e-05	77.693		1	S	SVPPVRNLHQSGFSLSGSQADDHIARRTAQK	0	0	0	0	0	0	0	0
O35098	544	O35098	O35098	Dihydropyrimidinase-related protein 4	Dpysl4	sp|O35098|DPYL4_MOUSE Dihydropyrimidinase-related protein 4 OS=Mus musculus OX=10090 GN=Dpysl4 PE=1 SV=1	0.743557	4.71274	1.21e-08	102.21	85.706	102.21	0.743557	4.71274	1.21e-08	102.21						1	S	PPVRNLHQSGFSLSGSQADDHIARRTAQKIM	484.91	502.71	447	457.17	560.63	378.74	338.84	365.54
O35099	965	O35099	O35099	Mitogen-activated protein kinase kinase kinase 5	Map3k5	sp|O35099|M3K5_MOUSE Mitogen-activated protein kinase kinase kinase 5 OS=Mus musculus OX=10090 GN=Map3k5 PE=1 SV=3	0.493318	0	0.0005838	92.856	62.651	92.856					0.493318	0	0.0005838	92.856			S	KKKKTQPKLSALSTGSNEYLRSISLPVPVLV	0	0	0	0	0	0	0	0
O35126	646	O35126	O35126	Atrophin-1	Atn1	sp|O35126|ATN1_MOUSE Atrophin-1 OS=Mus musculus OX=10090 GN=Atn1 PE=1 SV=1	0.983363	18.0612	0.00206491	48.477	42.04	48.477					0.983363	18.0612	0.00206491	48.477		1	S	PGSYKTATPPGYKPGSPPSFRTGTPPGYRGT	0	0	0	0	0	0	0	0
O35126	101	O35126	O35126	Atrophin-1	Atn1	sp|O35126|ATN1_MOUSE Atrophin-1 OS=Mus musculus OX=10090 GN=Atn1 PE=1 SV=1	0.973749	15.8249	1.42e-07	94.542	80.38	94.542	0.973749	15.8249	1.42e-07	94.542						1	S	APKKTKTEQELPRPQSPSDLDSLDGRSINDD	372.44	642.61	636.59	464.74	707.35	529.88	712.38	706.29
O35130	16	O35130	O35130	Ribosomal RNA small subunit methyltransferase NEP1	Emg1	sp|O35130|NEP1_MOUSE Ribosomal RNA small subunit methyltransferase NEP1 OS=Mus musculus OX=10090 GN=Emg1 PE=1 SV=1	0.99955	33.9995	0.000474789	61.648	41.809	61.648	0.99955	33.9995	0.000474789	61.648						1	S	MSAASGGFQPRERRFSVQEQDWETTPPKKLR	479.36	648.73	129.92	468.24	128.78	548.44	321.96	325.78
O35136	765	O35136	O35136	Neural cell adhesion molecule 2	Ncam2	sp|O35136|NCAM2_MOUSE Neural cell adhesion molecule 2 OS=Mus musculus OX=10090 GN=Ncam2 PE=1 SV=1	1	88.5523	0.000566693	88.552	66.679	88.552	1	88.5523	0.000566693	88.552	1	73.8341	0.00319603	73.834		1	S	SKELEEGKAAYLKDGSKEPIVEMRTEDERIT	17166	21451	6329.7	12340	10852	12432	11095	8135.2
O35136	786	O35136	O35136	Neural cell adhesion molecule 2	Ncam2	sp|O35136|NCAM2_MOUSE Neural cell adhesion molecule 2 OS=Mus musculus OX=10090 GN=Ncam2 PE=1 SV=1	0.999988	49.3845	9.23e-76	203.64	176.8	188.54	0.999551	33.5904	1.07e-36	149.55	0.999988	49.3845	9.23e-76	203.64		1;2	S	EMRTEDERITNHEDGSPVNEPNETTPLTEPE	11874	14389	1797.6	11031	10993	13293	9502.7	9693.3
O35144	364	O35144	O35144	Telomeric repeat-binding factor 2	Terf2	sp|O35144|TERF2_MOUSE Telomeric repeat-binding factor 2 OS=Mus musculus OX=10090 GN=Terf2 PE=1 SV=3	0.333333	0	0.000370125	63.894	53.259	46.592					0.333333	0	0.000370125	63.894			S	FAKLDQKDLVLANLASPSSPAHKHKRPRKDE	0	0	0	0	0	0	0	0
O35144	366	O35144	O35144	Telomeric repeat-binding factor 2	Terf2	sp|O35144|TERF2_MOUSE Telomeric repeat-binding factor 2 OS=Mus musculus OX=10090 GN=Terf2 PE=1 SV=3	0.465777	0	0.000370125	71.555	53.287	61.732	0.465777	0	0.000422017	71.555	0.333333	0	0.000370125	63.894			S	KLDQKDLVLANLASPSSPAHKHKRPRKDEHE	0	0	0	0	0	0	0	0
O35144	367	O35144	O35144	Telomeric repeat-binding factor 2	Terf2	sp|O35144|TERF2_MOUSE Telomeric repeat-binding factor 2 OS=Mus musculus OX=10090 GN=Terf2 PE=1 SV=3	0.465777	0	0.000370125	71.555	53.287	61.732	0.465777	0	0.000422017	71.555	0.333333	0	0.000370125	63.894			S	LDQKDLVLANLASPSSPAHKHKRPRKDEHES	0	0	0	0	0	0	0	0
O35174	441	O35174	O35174	Potassium voltage-gated channel subfamily S member 2	Kcns2	sp|O35174|KCNS2_MOUSE Potassium voltage-gated channel subfamily S member 2 OS=Mus musculus OX=10090 GN=Kcns2 PE=1 SV=1	1	65.3052	0.00802252	65.305	28.114	65.305	1	65.3052	0.00802252	65.305						1	S	AMRSCDFGDGMKEVPSVNLRDYYAHKVKSLM	862.23	1040.8	416.37	556.67	552.72	759.89	634.56	834.95
O35177	684	O35177	O35177	Enhancer of filamentation 1	Nedd9	sp|O35177|CASL_MOUSE Enhancer of filamentation 1 OS=Mus musculus OX=10090 GN=Nedd9 PE=1 SV=2	1	44.3093	0.0466326	44.309	17.795	44.309	1	44.3093	0.0466326	44.309	1	42.3949	0.0531189	42.395		1	S	QLLEQEITKPVENDISKWKPSQSLPTTNNSV	1136.5	4666.4	660.5	2499.3	3308.6	4247.2	3134.9	2896
O35188	262	O35188	O35188	Fractalkine;Processed fractalkine	Cx3cl1	sp|O35188|X3CL1_MOUSE Fractalkine OS=Mus musculus OX=10090 GN=Cx3cl1 PE=1 SV=3	0.999956	45.2974	6.39e-100	232.15	197.54	232.15	0.994399	22.4939	4.04e-15	134.86	0.999956	45.2974	6.39e-100	232.15		1	S	PWVQGQDLSPEKSLGSEEINPVHTDNFQERG	1569.8	4236.8	1966.9	2066.2	1544.9	2598.4	1524.8	2124.2
O35219	239	O35219	O35219	Potassium voltage-gated channel subfamily H member 2	Kcnh2	sp|O35219|KCNH2_MOUSE Potassium voltage-gated channel subfamily H member 2 OS=Mus musculus OX=10090 GN=Kcnh2 PE=1 SV=2	0.49954	0	0.000527236	77.912	53.53	77.912					0.49954	0	0.000527236	77.912			S	GLGPAEERRALVGPGSASPVASIRGPHPSPR	0	0	0	0	0	0	0	0
O35219	241	O35219	O35219	Potassium voltage-gated channel subfamily H member 2	Kcnh2	sp|O35219|KCNH2_MOUSE Potassium voltage-gated channel subfamily H member 2 OS=Mus musculus OX=10090 GN=Kcnh2 PE=1 SV=2	0.49954	0	0.000527236	77.912	53.53	77.912					0.49954	0	0.000527236	77.912			S	GPAEERRALVGPGSASPVASIRGPHPSPRAQ	0	0	0	0	0	0	0	0
O35219	873	O35219	O35219	Potassium voltage-gated channel subfamily H member 2	Kcnh2	sp|O35219|KCNH2_MOUSE Potassium voltage-gated channel subfamily H member 2 OS=Mus musculus OX=10090 GN=Kcnh2 PE=1 SV=2	0.792114	6.12295	0.00533467	40.844	27.181	40.844					0.792114	6.12295	0.00533467	40.844		1	S	LEITFNLRDTNMIPGSPGSAELESGFNRQRK	0	0	0	0	0	0	0	0
O35219	353	O35219	O35219	Potassium voltage-gated channel subfamily H member 2	Kcnh2	sp|O35219|KCNH2_MOUSE Potassium voltage-gated channel subfamily H member 2 OS=Mus musculus OX=10090 GN=Kcnh2 PE=1 SV=2	0.956827	16.4666	4.42e-05	80.156	64.06	80.156					0.956827	16.4666	4.42e-05	80.156		1	S	ITLNFVDLKGDPFLASPTSDREIIAPKIKER	0	0	0	0	0	0	0	0
O35219	320	O35219	O35219	Potassium voltage-gated channel subfamily H member 2	Kcnh2	sp|O35219|KCNH2_MOUSE Potassium voltage-gated channel subfamily H member 2 OS=Mus musculus OX=10090 GN=Kcnh2 PE=1 SV=2	0.395516	1.45996	0.014619	42.743	30.517	42.743					0.395516	1.45996	0.014619	42.743			S	ASTGAMHPLRSGLLNSTSDSDLVRYRTISKI	0	0	0	0	0	0	0	0
O35219	322	O35219	O35219	Potassium voltage-gated channel subfamily H member 2	Kcnh2	sp|O35219|KCNH2_MOUSE Potassium voltage-gated channel subfamily H member 2 OS=Mus musculus OX=10090 GN=Kcnh2 PE=1 SV=2	0.980274	17.063	2.14e-50	203.11	171.05	203.11	0.443856	0	0.0118064	51.092	0.980274	17.063	2.14e-50	203.11		1	S	TGAMHPLRSGLLNSTSDSDLVRYRTISKIPQ	0	0	0	0	0	0	0	0
O35231	86	O35231	O35231	Kinesin-like protein KIFC3	Kifc3	sp|O35231|KIFC3_MOUSE Kinesin-like protein KIFC3 OS=Mus musculus OX=10090 GN=Kifc3 PE=1 SV=4	1	43.2819	0.0335849	43.282	35.902	43.282	1	43.2819	0.0335849	43.282						1	S	SRTAARPSLAQCRALSVDWPGPRSPHRLYLT	328.11	478.62	247.89	443.75	182.69	462.69	235.07	363.48
O35250	283	O35250	O35250	Exocyst complex component 7	Exoc7	sp|O35250|EXOC7_MOUSE Exocyst complex component 7 OS=Mus musculus OX=10090 GN=Exoc7 PE=1 SV=2	1	55.3137	0.000523956	87.001	71.245	55.314	1	55.3137	0.000523956	87.001	1	74.7599	0.0017735	74.76		1	S	RPGTIRKAQNLLKQYSQHGLDGKKGGSNLIP	2152.9	7137.1	825.89	5863.5	958.38	4901.6	1516.5	2727.8
O35344	56	O35344	O35344	Importin subunit alpha-4	Kpna3	sp|O35344|IMA4_MOUSE Importin subunit alpha-4 OS=Mus musculus OX=10090 GN=Kpna3 PE=1 SV=1	0.97286	15.5445	0.000157783	72.496	63.796	72.496	0.97286	15.5445	0.000157783	72.496						1	S	RDEHLLKKRNVPQEESLEDSDVDADFKAQNV	560.85	957.65	231.38	818.58	930.44	499.84	438.43	767.96
O35393	274	O35393	O35393	Ephrin-B3	Efnb3	sp|O35393|EFNB3_MOUSE Ephrin-B3 OS=Mus musculus OX=10090 GN=Efnb3 PE=1 SV=1	1	83.2035	0.000361341	92.102	62.629	83.204	1	83.2035	0.000469873	83.204	1	79.4662	0.000361341	92.102		1	S	SESRHPGPGSFGRGGSLGLGGGGGMGPREAE	3264.9	3110.8	1635.1	2919.9	2460.2	1933.9	2537.6	2284.4
O35393	332	O35393	O35393	Ephrin-B3	Efnb3	sp|O35393|EFNB3_MOUSE Ephrin-B3 OS=Mus musculus OX=10090 GN=Efnb3 PE=1 SV=1	0.999721	35.5449	0.000443414	44.632	34.485	44.632					0.999721	35.5449	0.000443414	44.632		1	S	DYGHPVYIVQDGPPQSPPNIYYKV_______	0	0	0	0	0	0	0	0
O35417	235	O35417	O35417	Proenkephalin-B;Alpha-neoendorphin;Beta-neoendorphin;Big dynorphin;Dynorphin A(1-17);Dynorphin A(1-13);Dynorphin A(1-8);Leu-enkephalin;Rimorphin;Leumorphin	Pdyn	sp|O35417|PDYN_MOUSE Proenkephalin-B OS=Mus musculus OX=10090 GN=Pdyn PE=2 SV=1	0.989462	20.817	0.0170701	40.941	28.315	40.941					0.989462	20.817	0.0170701	40.941		1	S	RYGGFLRRQFKVVTRSQENPNTYSEDLDV__	0	0	0	0	0	0	0	0
O35454	684	O35454	O35454	Chloride transport protein 6	Clcn6	sp|O35454|CLCN6_MOUSE H(+)/Cl(-) exchange transporter 6 OS=Mus musculus OX=10090 GN=Clcn6 PE=1 SV=1	0.965895	14.5227	0.000588208	113.66	72.21	113.66	0.965895	14.5227	0.000588208	113.66						1	S	AGEQRKRGQSMKSYPSSELRNVCDEHVASEE	4957.3	6880.2	3406.3	4029	4577.8	5409.3	3680.4	4819.7
O35454	685	O35454	O35454	Chloride transport protein 6	Clcn6	sp|O35454|CLCN6_MOUSE H(+)/Cl(-) exchange transporter 6 OS=Mus musculus OX=10090 GN=Clcn6 PE=1 SV=1	0.820626	6.60385	4.15e-07	143.73	85.138	143.73					0.820626	6.60385	4.15e-07	143.73		1	S	GEQRKRGQSMKSYPSSELRNVCDEHVASEEP	0	0	0	0	0	0	0	0
O35492	157	O35492	O35492	Dual specificity protein kinase CLK3	Clk3	sp|O35492|CLK3_MOUSE Dual specificity protein kinase CLK3 OS=Mus musculus OX=10090 GN=Clk3 PE=1 SV=2	0.999985	48.1045	5.29e-05	100.22	79.76	96.096					0.999985	48.1045	5.29e-05	100.22		1	S	AAGAWETMHHCKRYRSPEPDPYLSYRWKRRR	0	0	0	0	0	0	0	0
O35495	24	O35495	O35495	Cyclin-dependent kinase 14	Cdk14	sp|O35495|CDK14_MOUSE Cyclin-dependent kinase 14 OS=Mus musculus OX=10090 GN=Cdk14 PE=1 SV=2	0.731228	4.40876	2.36e-06	135.63	110.5	135.63	0.473078	0	0.000488596	116.52	0.731228	4.40876	2.36e-06	135.63		1	S	PAEKIGKMKKLRRTLSESFSRIALKKEDTTF	0	0	0	0	0	0	0	0
O35495	26	O35495	O35495	Cyclin-dependent kinase 14	Cdk14	sp|O35495|CDK14_MOUSE Cyclin-dependent kinase 14 OS=Mus musculus OX=10090 GN=Cdk14 PE=1 SV=2	0.473078	0	0.000488596	116.52	95.07	116.52	0.473078	0	0.000488596	116.52							S	EKIGKMKKLRRTLSESFSRIALKKEDTTFDE	0	0	0	0	0	0	0	0
O35495	78	O35495	O35495	Cyclin-dependent kinase 14	Cdk14	sp|O35495|CDK14_MOUSE Cyclin-dependent kinase 14 OS=Mus musculus OX=10090 GN=Cdk14 PE=1 SV=2	0.740895	7.53156	0.0121009	52.693	38.486	52.693	0.740895	7.53156	0.0121009	52.693						1	S	DTIPEDKKVRVQRTQSTFDPFEKPANQVKRV	879.02	989.47	0	727.93	345.53	582.24	236.03	641.84
O35495	95	O35495	O35495	Cyclin-dependent kinase 14	Cdk14	sp|O35495|CDK14_MOUSE Cyclin-dependent kinase 14 OS=Mus musculus OX=10090 GN=Cdk14 PE=1 SV=2	1	42.5683	0.00393546	52.5	34.583	42.568	1	42.5683	0.0129313	42.568	1	52.5002	0.00393546	52.5		1	S	FDPFEKPANQVKRVHSENNACINFKSSSAGK	204.4	656.18	403.89	324.61	523.94	432.88	269.1	201.69
O35526	59	O35526	O35526	Syntaxin-1A	Stx1a	sp|O35526|STX1A_MOUSE Syntaxin-1A OS=Mus musculus OX=10090 GN=Stx1a PE=1 SV=3	0.999857	38.455	4.55e-06	108.71	82.847	79.311	0.999857	38.455	4.55e-06	108.71	0.999831	37.7292	0.000213947	80.238		1	S	IDKIAENVEEVKRKHSAILASPNPDEKTKEE	4113.6	7829.9	2462.5	4320.3	4239.5	4967	3936.3	4971.4
O35526	64	O35526	O35526	Syntaxin-1A	Stx1a	sp|O35526|STX1A_MOUSE Syntaxin-1A OS=Mus musculus OX=10090 GN=Stx1a PE=1 SV=3	1	73.3413	2.71e-104	247.79	217.46	242.01	1	66.938	2.71e-104	247.79	1	73.3413	6e-104	242.01		1	S	ENVEEVKRKHSAILASPNPDEKTKEELEELM	29910	60834	4121.3	40273	29555	27385	29264	49800
O35526	200	O35526	O35526	Syntaxin-1A	Stx1a	sp|O35526|STX1A_MOUSE Syntaxin-1A OS=Mus musculus OX=10090 GN=Stx1a PE=1 SV=3	0.499942	0	0.00254536	55.864	40.61	55.864	0.499942	0	0.00254536	55.864						1	S	SSISKQALSEIETRHSEIIKLETSIRELHDM	190.7	351.53	123.41	264.93	300.09	395.95	316.82	355.87
O35526	95	O35526	O35526	Syntaxin-1A	Stx1a	sp|O35526|STX1A_MOUSE Syntaxin-1A OS=Mus musculus OX=10090 GN=Stx1a PE=1 SV=3	0.999998	56.9578	0.000206389	94.551	45.051	94.551	0.999998	56.9578	0.000206389	94.551						1	S	SDIKKTANKVRSKLKSIEQSIEQEEGLNRSS	419.65	661.89	0	548.77	407.42	481.28	547.24	440.28
O35526	109	O35526	O35526	Syntaxin-1A	Stx1a	sp|O35526|STX1A_MOUSE Syntaxin-1A OS=Mus musculus OX=10090 GN=Stx1a PE=1 SV=3	0.499433	0	0.000157652	60.398	40.85	60.398	0.499433	0	0.000157652	60.398							S	KSIEQSIEQEEGLNRSSADLRIRKTQHSTLS	0	0	0	0	0	0	0	0
O35526	110	O35526	O35526	Syntaxin-1A	Stx1a	sp|O35526|STX1A_MOUSE Syntaxin-1A OS=Mus musculus OX=10090 GN=Stx1a PE=1 SV=3	0.499433	0	0.000157652	60.398	40.85	60.398	0.499433	0	0.000157652	60.398							S	SIEQSIEQEEGLNRSSADLRIRKTQHSTLSR	0	0	0	0	0	0	0	0
O35526	14	O35526	O35526	Syntaxin-1A	Stx1a	sp|O35526|STX1A_MOUSE Syntaxin-1A OS=Mus musculus OX=10090 GN=Stx1a PE=1 SV=3	0.999118	30.7422	0	379.41	333.09	231.89	0.999118	30.7422	0	379.41	0.79846	6.07369	6.97e-05	73.036		1	S	__MKDRTQELRTAKDSDDDDDVTVTVDRDRF	258230	546930	337520	208610	433970	422950	356690	355150
O35551	407	O35551	O35551	Rab GTPase-binding effector protein 1	Rabep1	sp|O35551|RABE1_MOUSE Rab GTPase-binding effector protein 1 OS=Mus musculus OX=10090 GN=Rabep1 PE=1 SV=2	0.954304	14.1465	5.15e-47	181.64	140.78	129.11	0.954304	14.1465	3.93e-40	176.68	0.91299	11.7272	5.15e-47	181.64		1	S	KSDNDMFKDGLRRAQSTDSLGTSSSLQSKAL	6068.7	5639.8	4018	5332.4	2041.8	5181.7	3149.7	4570.3
O35551	410	O35551	O35551	Rab GTPase-binding effector protein 1	Rabep1	sp|O35551|RABE1_MOUSE Rab GTPase-binding effector protein 1 OS=Mus musculus OX=10090 GN=Rabep1 PE=1 SV=2	0.76008	5.33181	2.44e-248	322.37	242.12	322.37	0.76008	5.33181	2.44e-248	322.37						1	S	NDMFKDGLRRAQSTDSLGTSSSLQSKALGYN	7418.1	13050	5229.3	8198.6	3004.3	5876.1	2415.5	7186.3
O35607	680	O35607	O35607	Bone morphogenetic protein receptor type-2	Bmpr2	sp|O35607|BMPR2_MOUSE Bone morphogenetic protein receptor type-2 OS=Mus musculus OX=10090 GN=Bmpr2 PE=1 SV=1	0.499998	0	0.000752742	65.943	54.028	65.943					0.499998	0	0.000752742	65.943		1	S	TNKLDPKEVDKNLKESSDENLMEHSLKQFSG	0	0	0	0	0	0	0	0
O35607	681	O35607	O35607	Bone morphogenetic protein receptor type-2	Bmpr2	sp|O35607|BMPR2_MOUSE Bone morphogenetic protein receptor type-2 OS=Mus musculus OX=10090 GN=Bmpr2 PE=1 SV=1	0.499998	0	0.000752742	65.943	54.028	65.943					0.499998	0	0.000752742	65.943		1	S	NKLDPKEVDKNLKESSDENLMEHSLKQFSGP	0	0	0	0	0	0	0	0
O35607	862	O35607	O35607	Bone morphogenetic protein receptor type-2	Bmpr2	sp|O35607|BMPR2_MOUSE Bone morphogenetic protein receptor type-2 OS=Mus musculus OX=10090 GN=Bmpr2 PE=1 SV=1	0.702411	3.72975	2.89e-51	204.28	166.69	204.28	0.702411	3.72975	2.89e-51	204.28	0.556153	0.979618	0.000231766	84.566		1	S	LQNQFIGEDTRLNINSSPDEHEPLLRREQQA	2641.9	4168.3	2224	1599	4929	3153.2	3505.1	2597.3
O35607	863	O35607	O35607	Bone morphogenetic protein receptor type-2	Bmpr2	sp|O35607|BMPR2_MOUSE Bone morphogenetic protein receptor type-2 OS=Mus musculus OX=10090 GN=Bmpr2 PE=1 SV=1	0.973054	15.5764	4.79e-33	173.44	149.51	173.44	0.5	0	0.000352522	62.203	0.973054	15.5764	4.79e-33	173.44		1	S	QNQFIGEDTRLNINSSPDEHEPLLRREQQAG	674.59	507.9	714.24	447.01	294.28	596.63	658.49	629.58
O35607	515	O35607	O35607	Bone morphogenetic protein receptor type-2	Bmpr2	sp|O35607|BMPR2_MOUSE Bone morphogenetic protein receptor type-2 OS=Mus musculus OX=10090 GN=Bmpr2 PE=1 SV=1	0.716014	4.93313	9.8e-07	116.04	84.213	116.04					0.716014	4.93313	9.8e-07	116.04		1	S	RMAELMMIWERNKSVSPTVNPMSTAMQNERN	0	0	0	0	0	0	0	0
O35609	78	O35609	O35609	Secretory carrier-associated membrane protein 3	Scamp3	sp|O35609|SCAM3_MOUSE Secretory carrier-associated membrane protein 3 OS=Mus musculus OX=10090 GN=Scamp3 PE=1 SV=3	0.661338	2.90657	0.00218496	114.51	100.31	114.51	0.617814	2.08582	0.00218496	98.257	0.661338	2.90657	0.00341147	114.51		1	S	LPPPSAPSVQSSRKLSPTEPRNYGSYSTQAS	14420	22040	8191.2	12175	13943	11020	13189	12395
O35615	681	O35615	O35615	Zinc finger protein ZFPM1	Zfpm1	sp|O35615|FOG1_MOUSE Zinc finger protein ZFPM1 OS=Mus musculus OX=10090 GN=Zfpm1 PE=1 SV=1	0.292879	0	0.00220474	45.115	40.132	45.115	0.292879	0	0.00220474	45.115							S	TPEAEAAGRGSEGSQSPGSSVDDAEDDPSRT	0	0	0	0	0	0	0	0
O35615	684	O35615	O35615	Zinc finger protein ZFPM1	Zfpm1	sp|O35615|FOG1_MOUSE Zinc finger protein ZFPM1 OS=Mus musculus OX=10090 GN=Zfpm1 PE=1 SV=1	0.292879	0	0.00220474	45.115	40.132	45.115	0.292879	0	0.00220474	45.115							S	AEAAGRGSEGSQSPGSSVDDAEDDPSRTLCE	0	0	0	0	0	0	0	0
O35615	685	O35615	O35615	Zinc finger protein ZFPM1	Zfpm1	sp|O35615|FOG1_MOUSE Zinc finger protein ZFPM1 OS=Mus musculus OX=10090 GN=Zfpm1 PE=1 SV=1	0.292879	0	0.00220474	45.115	40.132	45.115	0.292879	0	0.00220474	45.115							S	EAAGRGSEGSQSPGSSVDDAEDDPSRTLCEA	0	0	0	0	0	0	0	0
O35618	341	O35618	O35618	Protein Mdm4	Mdm4	sp|O35618|MDM4_MOUSE Protein Mdm4 OS=Mus musculus OX=10090 GN=Mdm4 PE=1 SV=2	0.842047	8.58355	0.000323472	69.148	44.61	69.148	0.708259	7.68674	0.00312351	45.704	0.842047	8.58355	0.000323472	69.148		1	S	RKDWYSDCSKLTHSLSTSNITAIPEKKDNEG	248.49	227.94	0	390.17	0	247.37	368.96	190.33
O35618	367	O35618	O35618	Protein Mdm4	Mdm4	sp|O35618|MDM4_MOUSE Protein Mdm4 OS=Mus musculus OX=10090 GN=Mdm4 PE=1 SV=2	0.997112	25.3809	0.0100751	68.893	41.564	68.893					0.997112	25.3809	0.0100751	68.893		1	S	KDNEGIDVPDCRRTISAPVVRPKDGYLKEEK	0	0	0	0	0	0	0	0
O35621	242	O35621	O35621	Phosphomannomutase 1	Pmm1	sp|O35621|PMM1_MOUSE Phosphomannomutase 1 OS=Mus musculus OX=10090 GN=Pmm1 PE=1 SV=1	0.999287	31.4951	6.26e-33	171.08	142.38	133.28	0.999287	31.4951	4.55e-27	159.22	0.974814	15.9701	6.26e-33	171.08		1	S	FEIYADPRTVGHSVVSPQDTVQRCRELFFPE	2028.9	1782.7	1391.7	1647.8	1944.1	1654.2	1649.3	1675.4
O35623	50	O35623	O35623	BET1 homolog	Bet1	sp|O35623|BET1_MOUSE BET1 homolog OS=Mus musculus OX=10090 GN=Bet1 PE=1 SV=1	0.988139	19.207	7.6e-06	101.6	71.031	96.734	0.988139	19.207	3.23e-05	96.734	0.985361	18.2809	7.6e-06	101.6		1	S	LTESLRSKVTAIKSLSIEIGHEVKNQNKLLA	2582	1982	1189.3	1525	648.42	1552.3	646.05	1046
O35633	95	O35633	O35633	Vesicular inhibitory amino acid transporter	Slc32a1	sp|O35633|VIAAT_MOUSE Vesicular inhibitory amino acid transporter OS=Mus musculus OX=10090 GN=Slc32a1 PE=1 SV=3	0.759404	4.99184	4.07e-25	178.71	145.71	178.71	0.759404	4.99184	4.07e-25	178.71	0.611663	1.97304	2.88e-11	92.49		1	S	EGDIHYQRGGAPLPPSGSKDQAVGAGGEFGG	31193	55946	50099	37195	31644	41746	31047	33271
O35633	97	O35633	O35633	Vesicular inhibitory amino acid transporter	Slc32a1	sp|O35633|VIAAT_MOUSE Vesicular inhibitory amino acid transporter OS=Mus musculus OX=10090 GN=Slc32a1 PE=1 SV=3	0.996709	24.8121	7.73e-44	202.18	148.97	114.86	0.996119	24.0941	1.1e-33	190.78	0.996709	24.8121	7.73e-44	202.18		1	S	DIHYQRGGAPLPPSGSKDQAVGAGGEFGGHD	228180	395070	80168	256490	198830	286690	216490	248560
O35633	15	O35633	O35633	Vesicular inhibitory amino acid transporter	Slc32a1	sp|O35633|VIAAT_MOUSE Vesicular inhibitory amino acid transporter OS=Mus musculus OX=10090 GN=Slc32a1 PE=1 SV=3	0.857562	8.36494	4.67e-08	100.22	69.785	100.22	0.857562	8.36494	4.67e-08	100.22	0.5011	0.0356161	8.87e-06	100.22		1	S	_MATLLRSKLTNVATSVSNKSQAKVSGMFAR	0	0	0	0	0	0	0	0
O35633	17	O35633	O35633	Vesicular inhibitory amino acid transporter	Slc32a1	sp|O35633|VIAAT_MOUSE Vesicular inhibitory amino acid transporter OS=Mus musculus OX=10090 GN=Slc32a1 PE=1 SV=3	0.993394	22.555	9.21e-09	110.29	85.44	64.65	0.993394	22.555	0.00405032	64.65	0.92746	11.7623	9.21e-09	110.29		1	S	ATLLRSKLTNVATSVSNKSQAKVSGMFARMG	420.38	833.16	138.31	346.51	426.24	647.55	552.59	661.99
O35633	65	O35633	O35633	Vesicular inhibitory amino acid transporter	Slc32a1	sp|O35633|VIAAT_MOUSE Vesicular inhibitory amino acid transporter OS=Mus musculus OX=10090 GN=Slc32a1 PE=1 SV=3	1	61.9111	6.27e-06	61.911	49.478	61.911					1	61.9111	6.27e-06	61.911		1	S	LDFEHRQGLQMDILKSEGEPCGDEGAEAPVE	0	0	0	0	0	0	0	0
O35633	414	O35633	O35633	Vesicular inhibitory amino acid transporter	Slc32a1	sp|O35633|VIAAT_MOUSE Vesicular inhibitory amino acid transporter OS=Mus musculus OX=10090 GN=Slc32a1 PE=1 SV=3	0.999962	44.2031	0.0469924	44.203	23.9	44.203					0.999962	44.2031	0.0469924	44.203		1	S	FAAVEVLEKSLFQEGSRAFFPACYGGDGRLK	0	0	0	0	0	0	0	0
O35664	403	O35664	O35664	Interferon alpha/beta receptor 2	Ifnar2	sp|O35664|INAR2_MOUSE Interferon alpha/beta receptor 2 OS=Mus musculus OX=10090 GN=Ifnar2 PE=1 SV=2	0.992429	21.1757	0.00402436	67.334	51.08	67.334					0.992429	21.1757	0.00402436	67.334		1	S	AGPSEDPTGPYERRKSVLEDSFPREDNSSMD	0	0	0	0	0	0	0	0
O35668	615	O35668	O35668	Huntingtin-associated protein 1	Hap1	sp|O35668|HAP1_MOUSE Huntingtin-associated protein 1 OS=Mus musculus OX=10090 GN=Hap1 PE=1 SV=1	0.990223	21.2897	4.37e-124	246.63	228.32	114.74	0.990223	21.2897	2.72e-10	114.74	0.974076	15.7579	4.37e-124	246.63		1	S	PTQDSQRLEEDRATHSPSAREEEGPSGAT__	133.82	1178.7	0	503.3	194.73	240.87	660.17	185.85
O35668	579	O35668	O35668	Huntingtin-associated protein 1	Hap1	sp|O35668|HAP1_MOUSE Huntingtin-associated protein 1 OS=Mus musculus OX=10090 GN=Hap1 PE=1 SV=1	0.96934	14.999	2.61e-66	193.06	169.02	193.06					0.96934	14.999	2.61e-66	193.06		1	S	AHSKRQQKQKVVPKDSPTPQQQTNMGGGILE	0	0	0	0	0	0	0	0
O35668	175	O35668	O35668	Huntingtin-associated protein 1	Hap1	sp|O35668|HAP1_MOUSE Huntingtin-associated protein 1 OS=Mus musculus OX=10090 GN=Hap1 PE=1 SV=1	1	43.442	0.0384521	43.442	29.779	43.442					1	43.442	0.0384521	43.442		1	S	LNTAARIGQSLVKQNSVLMEENNKLETMLGS	0	0	0	0	0	0	0	0
O35691	346	O35691	O35691	Pinin	Pnn	sp|O35691|PININ_MOUSE Pinin OS=Mus musculus OX=10090 GN=Pnn PE=1 SV=4	1	52.5549	0.00742892	58.098	34.349	52.555	1	52.5549	0.0112836	52.555	1	58.0983	0.00742892	58.098		1	S	EEAGEEEEKEAGIVHSDAEKEQEEEEQKQEM	660.2	965.47	233.54	558.73	979.65	450.47	775.03	805.85
O35691	96	O35691	O35691	Pinin	Pnn	sp|O35691|PININ_MOUSE Pinin OS=Mus musculus OX=10090 GN=Pnn PE=1 SV=4	0.585019	1.49142	0.00102843	91.032	68.153	91.032	0.585019	1.49142	0.00102843	91.032						1	S	GAVSRLGGERRTRRESRQESDPEDDDVKKPA	1905.4	2900.2	389.53	1908.3	755.47	2044.4	1317.8	2019.1
O35691	100	O35691	O35691	Pinin	Pnn	sp|O35691|PININ_MOUSE Pinin OS=Mus musculus OX=10090 GN=Pnn PE=1 SV=4	1	101.39	7.79e-06	101.39	69.328	101.39	1	101.39	7.79e-06	101.39						1	S	RLGGERRTRRESRQESDPEDDDVKKPALQSS	786.3	1840.8	236.17	1136.3	1407.6	1149.9	893.72	1312.1
O35691	66	O35691	O35691	Pinin	Pnn	sp|O35691|PININ_MOUSE Pinin OS=Mus musculus OX=10090 GN=Pnn PE=1 SV=4	0.988449	19.3234	6.3e-34	184.87	149.46	124.51	0.985794	18.4132	6.3e-34	184.87	0.988449	19.3234	1.72e-10	124.51		1	S	GGGRGRGSLLLRRGFSDSGGGPPAKQRDLEG	18222	23355	9831.8	15038	13188	16058	9977.1	14127
O35691	68	O35691	O35691	Pinin	Pnn	sp|O35691|PININ_MOUSE Pinin OS=Mus musculus OX=10090 GN=Pnn PE=1 SV=4	0.635708	2.41809	1.25e-18	159.44	121.42	159.44					0.635708	2.41809	1.25e-18	159.44		1	S	GRGRGSLLLRRGFSDSGGGPPAKQRDLEGAV	0	0	0	0	0	0	0	0
O35737;P70333	63;63	O35737	O35737	Heterogeneous nuclear ribonucleoprotein H;Heterogeneous nuclear ribonucleoprotein H
O35737;P70333	104;104	O35737	O35737	Heterogeneous nuclear ribonucleoprotein H;Heterogeneous nuclear ribonucleoprotein H
O35864	284	O35864	O35864	COP9 signalosome complex subunit 5	Cops5	sp|O35864|CSN5_MOUSE COP9 signalosome complex subunit 5 OS=Mus musculus OX=10090 GN=Cops5 PE=1 SV=3	1	66.2235	0.000714118	74.789	60.631	74.789	0.999913	40.5847	0.00844986	51.013	1	66.2235	0.000714118	74.789		1	S	LSEKLEQSEAQLGRGSFMLGLETHDRKSEDK	430.58	492.63	390.78	235.54	520.6	518.59	357.81	315.62
O35874	502	O35874	O35874	Neutral amino acid transporter A	Slc1a4	sp|O35874|SATT_MOUSE Neutral amino acid transporter A OS=Mus musculus OX=10090 GN=Slc1a4 PE=1 SV=1	0.309549	0	2.57e-05	51.9	44.367	51.9	0.249994	0	0.000309385	45.862	0.309549	0	2.57e-05	51.9			S	QELQEVKVEAIPNSKSEEETSPLVTHQNPAG	0	0	0	0	0	0	0	0
O35874	507	O35874	O35874	Neutral amino acid transporter A	Slc1a4	sp|O35874|SATT_MOUSE Neutral amino acid transporter A OS=Mus musculus OX=10090 GN=Slc1a4 PE=1 SV=1	0.864261	8.18243	8.25e-48	179.41	161.62	179.41	0.856514	7.9406	3.35e-26	144.43	0.864261	8.18243	8.25e-48	179.41		1	S	VKVEAIPNSKSEEETSPLVTHQNPAGPVAIA	2147.8	3721.3	1274.8	1560.4	2688.2	2162.6	2064.9	2044.6
O35874	527	O35874	O35874	Neutral amino acid transporter A	Slc1a4	sp|O35874|SATT_MOUSE Neutral amino acid transporter A OS=Mus musculus OX=10090 GN=Slc1a4 PE=1 SV=1	1	101.581	1.15e-21	125.68	111.22	125.68					1	101.581	1.15e-21	125.68		1	S	HQNPAGPVAIAPELESKESVL__________	0	0	0	0	0	0	0	0
O35874	500	O35874	O35874	Neutral amino acid transporter A	Slc1a4	sp|O35874|SATT_MOUSE Neutral amino acid transporter A OS=Mus musculus OX=10090 GN=Slc1a4 PE=1 SV=1	1	81.3376	0.00300015	81.338	57.183	81.338					1	81.3376	0.00300015	81.338		1	S	GEQELQEVKVEAIPNSKSEEETSPLVTHQNP	0	0	0	0	0	0	0	0
O35927	412	O35927	O35927	Catenin delta-2	Ctnnd2	sp|O35927|CTND2_MOUSE Catenin delta-2 OS=Mus musculus OX=10090 GN=Ctnnd2 PE=1 SV=1	1	144.289	3.04e-39	174.46	141.72	144.29	1	144.289	1.35e-22	153.45	1	174.458	3.04e-39	174.46		1	S	SSQHGHLAPELRALQSPEHHIDPIYEDRVYQ	9203.8	15521	9812.6	9732.2	8534.3	10256	6493.8	9466.3
O35927	1061	O35927	O35927	Catenin delta-2	Ctnnd2	sp|O35927|CTND2_MOUSE Catenin delta-2 OS=Mus musculus OX=10090 GN=Ctnnd2 PE=1 SV=1	0.447382	3.5117	8.98e-06	91.733	64.345	91.733	0.447382	3.5117	8.98e-06	91.733							S	SLYKKDGWSQYHFVASSSTIERDRQRPYSSS	0	0	0	0	0	0	0	0
O35927	282	O35927	O35927	Catenin delta-2	Ctnnd2	sp|O35927|CTND2_MOUSE Catenin delta-2 OS=Mus musculus OX=10090 GN=Ctnnd2 PE=1 SV=1	1	126.086	1.28e-16	143.94	123.16	126.09	1	126.086	1.52e-10	126.09	1	143.939	1.28e-16	143.94		1	S	TTTQGGSPTKLQRGGSAPEGAAYAAPRGSSP	3653.4	3811.1	2369.3	3066.3	2946.5	3083.5	2099.1	3300.5
O35927	264	O35927	O35927	Catenin delta-2	Ctnnd2	sp|O35927|CTND2_MOUSE Catenin delta-2 OS=Mus musculus OX=10090 GN=Ctnnd2 PE=1 SV=1	0.999995	53.7933	5.8e-126	262.42	227.67	237.35	0.999995	53.7933	5.8e-126	262.42	0.999973	45.9119	5.18e-33	172.82		1;2	S	LYYSSSTLPAPPRGGSPLTTTQGGSPTKLQR	10855	22562	6344	13613	10707	15001	8056.9	13716
O35927	273	O35927	O35927	Catenin delta-2	Ctnnd2	sp|O35927|CTND2_MOUSE Catenin delta-2 OS=Mus musculus OX=10090 GN=Ctnnd2 PE=1 SV=1	0.999846	39.1575	1.08e-218	306.37	269.95	291.63	0.996935	25.247	1.84e-218	302.34	0.999846	39.1575	1.08e-218	306.37		1;2	S	APPRGGSPLTTTQGGSPTKLQRGGSAPEGAA	27853	37307	14005	25118	24486	30444	20408	27470
O35927	7	O35927	O35927	Catenin delta-2	Ctnnd2	sp|O35927|CTND2_MOUSE Catenin delta-2 OS=Mus musculus OX=10090 GN=Ctnnd2 PE=1 SV=1	0.999985	50.692	4.57e-05	55.587	49.465	54.259	0.999985	50.692	5.86e-05	54.259	0.999955	44.898	4.57e-05	55.587		1	S	_________MFARKQSGAAPFGAMPVPDQPP	1289.2	1666.1	691.12	860.34	1396	977.07	1431.3	1591.1
O35927	32	O35927	O35927	Catenin delta-2	Ctnnd2	sp|O35927|CTND2_MOUSE Catenin delta-2 OS=Mus musculus OX=10090 GN=Ctnnd2 PE=1 SV=1	0.801448	6.96852	1.11e-12	76.853	68.253	76.853					0.801448	6.96852	1.11e-12	76.853		1	S	VPDQPPSASEKNSSLSPGLNTSNGDGSETET	0	0	0	0	0	0	0	0
O35927	1149	O35927	O35927	Catenin delta-2	Ctnnd2	sp|O35927|CTND2_MOUSE Catenin delta-2 OS=Mus musculus OX=10090 GN=Ctnnd2 PE=1 SV=1	1	97.5513	5.94e-08	98.439	43.968	97.551	1	97.5513	2.57e-05	97.551	1	98.4392	5.94e-08	98.439		1	S	TMTAQNTGVSTLYRNSYGAPAEDIKQNQVST	729.72	2377.4	324.4	1055	2259.4	1258.8	945.13	1224.6
O35927	435	O35927	O35927	Catenin delta-2	Ctnnd2	sp|O35927|CTND2_MOUSE Catenin delta-2 OS=Mus musculus OX=10090 GN=Ctnnd2 PE=1 SV=1	0.801035	7.12963	3.93e-06	96.54	86.752	90.193	0.796829	6.87721	0.000129538	62.611	0.801035	7.12963	3.93e-06	96.54		1	S	IYEDRVYQKPPMRSLSQSQGDPLPPAHTGTF	701.65	1073.5	309.29	826.73	464.1	796.36	469.27	868.41
O35927	437	O35927	O35927	Catenin delta-2	Ctnnd2	sp|O35927|CTND2_MOUSE Catenin delta-2 OS=Mus musculus OX=10090 GN=Ctnnd2 PE=1 SV=1	0.549039	1.00404	2.09e-05	86.367	67.043	86.367					0.549039	1.00404	2.09e-05	86.367		1	S	EDRVYQKPPMRSLSQSQGDPLPPAHTGTFRT	0	0	0	0	0	0	0	0
O35927	529	O35927	O35927	Catenin delta-2	Ctnnd2	sp|O35927|CTND2_MOUSE Catenin delta-2 OS=Mus musculus OX=10090 GN=Ctnnd2 PE=1 SV=1	0.961199	13.9407	0.0116728	75.294	43.073	75.294					0.961199	13.9407	0.0116728	75.294		1	S	SKSGPALPPEGTLARSPSIDSIQKDPREFGW	0	0	0	0	0	0	0	0
O35927	531	O35927	O35927	Catenin delta-2	Ctnnd2	sp|O35927|CTND2_MOUSE Catenin delta-2 OS=Mus musculus OX=10090 GN=Ctnnd2 PE=1 SV=1	0.993065	24.1541	2.85e-12	157.28	91.088	157.28	0.993065	24.1541	2.85e-12	157.28	0.815865	8.99654	2.8e-10	149.17		1	S	SGPALPPEGTLARSPSIDSIQKDPREFGWRD	39931	29836	7946.7	27251	38316	27735	30102	30591
O35927	534	O35927	O35927	Catenin delta-2	Ctnnd2	sp|O35927|CTND2_MOUSE Catenin delta-2 OS=Mus musculus OX=10090 GN=Ctnnd2 PE=1 SV=1	0.892863	11.6003	5.42e-05	101.39	51.286	98.898	0.871293	10.5665	9.35e-05	101.39	0.892863	11.6003	5.42e-05	98.898		1	S	ALPPEGTLARSPSIDSIQKDPREFGWRDPEL	6743.3	9535.4	762.76	7268.5	8134.3	7761.4	5732.5	7378.3
O35927	471	O35927	O35927	Catenin delta-2	Ctnnd2	sp|O35927|CTND2_MOUSE Catenin delta-2 OS=Mus musculus OX=10090 GN=Ctnnd2 PE=1 SV=1	0.733939	4.40679	5.14e-11	132.36	114.66	132.36	0.733939	4.40679	5.14e-11	132.36						1	S	PSSPGVDSVPLQRTGSQHGPQNAAAATFQRA	3683.6	6984.6	3714.2	4933.6	3544.4	4553.4	2771.2	3966.8
O35927	1082	O35927	O35927	Catenin delta-2	Ctnnd2	sp|O35927|CTND2_MOUSE Catenin delta-2 OS=Mus musculus OX=10090 GN=Ctnnd2 PE=1 SV=1	0.999989	50.2205	1.69e-06	131.22	94.034	126.82	0.999989	50.2205	2.04e-06	126.82	0.999988	50.0615	1.69e-06	131.22		1;2	S	RDRQRPYSSSRTPSISPVRVSPNNRSASAPA	8707.8	8904.1	6099.7	6417.3	7619.5	7150.6	6082.9	6813.3
O35927	1087	O35927	O35927	Catenin delta-2	Ctnnd2	sp|O35927|CTND2_MOUSE Catenin delta-2 OS=Mus musculus OX=10090 GN=Ctnnd2 PE=1 SV=1	0.999989	50.5177	6.84e-10	123.1	97.648	111.01	0.999989	50.5177	2.04e-06	111.01	0.999944	44.3373	6.84e-10	123.1		1;2	S	PYSSSRTPSISPVRVSPNNRSASAPASPREM	1397.9	1048	1024.4	758.12	878.24	978.18	846.76	905.82
O35927	457	O35927	O35927	Catenin delta-2	Ctnnd2	sp|O35927|CTND2_MOUSE Catenin delta-2 OS=Mus musculus OX=10090 GN=Ctnnd2 PE=1 SV=1	0.602108	1.83221	5.97e-248	314.06	273.33	135.86	0.586683	1.51771	5.97e-248	314.06	0.602108	1.83221	7.72e-15	135.86		1;2	S	LPPAHTGTFRTSTAPSSPGVDSVPLQRTGSQ	3829.6	5181.2	3287.6	4233.2	3278	4082.7	2082.9	3538.8
O35927	458	O35927	O35927	Catenin delta-2	Ctnnd2	sp|O35927|CTND2_MOUSE Catenin delta-2 OS=Mus musculus OX=10090 GN=Ctnnd2 PE=1 SV=1	0.499999	0	5.97e-248	314.06	273.33	314.06	0.499999	0	5.97e-248	314.06	0.49571	0	0.00554377	45.014		1	S	PPAHTGTFRTSTAPSSPGVDSVPLQRTGSQH	3829.6	5181.2	3287.6	4233.2	3278	4082.7	2082.9	3538.8
O35954	593	O35954	O35954	Membrane-associated phosphatidylinositol transfer protein 1	Pitpnm1	sp|O35954|PITM1_MOUSE Membrane-associated phosphatidylinositol transfer protein 1 OS=Mus musculus OX=10090 GN=Pitpnm1 PE=1 SV=1	0.999945	42.6334	6.79e-09	70.799	58.121	52.345	0.999945	42.6334	8.01e-09	70.213	0.999662	34.7063	6.79e-09	70.799		1	S	SASAGPGSRGSSRRGSMNNEMLSPEVGPVRD	281.97	510.21	182.41	278.3	468.71	242.22	220.25	282.9
O35954	283	O35954	O35954	Membrane-associated phosphatidylinositol transfer protein 1	Pitpnm1	sp|O35954|PITM1_MOUSE Membrane-associated phosphatidylinositol transfer protein 1 OS=Mus musculus OX=10090 GN=Pitpnm1 PE=1 SV=1	0.240042	0	2.56e-09	64.072	56.008	64.072	0.240042	0	2.56e-09	64.072							S	AQTPGKSSTEARPGTSTAGTPDGPEAPPGPD	0	0	0	0	0	0	0	0
O35954	300	O35954	O35954	Membrane-associated phosphatidylinositol transfer protein 1	Pitpnm1	sp|O35954|PITM1_MOUSE Membrane-associated phosphatidylinositol transfer protein 1 OS=Mus musculus OX=10090 GN=Pitpnm1 PE=1 SV=1	0.99846	28.1185	1.3e-44	146.98	129.75	146.98	0.992399	21.8578	1.3e-09	70.024	0.99846	28.1185	1.3e-44	146.98		1;2	S	AGTPDGPEAPPGPDASPDASFGKQWSSSSRS	0	0	0	0	0	0	0	0
O35954	315	O35954	O35954	Membrane-associated phosphatidylinositol transfer protein 1	Pitpnm1	sp|O35954|PITM1_MOUSE Membrane-associated phosphatidylinositol transfer protein 1 OS=Mus musculus OX=10090 GN=Pitpnm1 PE=1 SV=1	0.427127	0	4.85e-31	159.59	135.91	159.59	0.42041	0	3.46e-05	73.11	0.427127	0	4.85e-31	159.59			S	SPDASFGKQWSSSSRSSYSSQHGGGVSPQSL	0	0	0	0	0	0	0	0
O35954	316	O35954	O35954	Membrane-associated phosphatidylinositol transfer protein 1	Pitpnm1	sp|O35954|PITM1_MOUSE Membrane-associated phosphatidylinositol transfer protein 1 OS=Mus musculus OX=10090 GN=Pitpnm1 PE=1 SV=1	0.427127	0	4.85e-31	159.59	135.91	159.59	0.42041	0	3.46e-05	73.11	0.427127	0	4.85e-31	159.59			S	PDASFGKQWSSSSRSSYSSQHGGGVSPQSLS	0	0	0	0	0	0	0	0
O35954	318	O35954	O35954	Membrane-associated phosphatidylinositol transfer protein 1	Pitpnm1	sp|O35954|PITM1_MOUSE Membrane-associated phosphatidylinositol transfer protein 1 OS=Mus musculus OX=10090 GN=Pitpnm1 PE=1 SV=1	0.841222	10.6166	2.26e-81	206.59	185.75	206.59					0.841222	10.6166	2.26e-81	206.59		1	S	ASFGKQWSSSSRSSYSSQHGGGVSPQSLSEW	0	0	0	0	0	0	0	0
O35954	326	O35954	O35954	Membrane-associated phosphatidylinositol transfer protein 1	Pitpnm1	sp|O35954|PITM1_MOUSE Membrane-associated phosphatidylinositol transfer protein 1 OS=Mus musculus OX=10090 GN=Pitpnm1 PE=1 SV=1	0.997284	25.7591	7.34e-41	174.02	151.7	174.02					0.997284	25.7591	7.34e-41	174.02		1	S	SSSRSSYSSQHGGGVSPQSLSEWRMQNIARD	0	0	0	0	0	0	0	0
O54692	438	O54692	O54692	Centromere/kinetochore protein zw10 homolog	Zw10	sp|O54692|ZW10_MOUSE Centromere/kinetochore protein zw10 homolog OS=Mus musculus OX=10090 GN=Zw10 PE=1 SV=3	1	68.034	0.000265049	72.184	51.721	68.034					1	68.034	0.000265049	72.184		1	S	VKIGPDCKEALPDLPSPDADHKLQVQTVCKA	0	0	0	0	0	0	0	0
O54724	38	O54724	O54724	Polymerase I and transcript release factor	Ptrf	sp|O54724|CAVN1_MOUSE Caveolae-associated protein 1 OS=Mus musculus OX=10090 GN=Cavin1 PE=1 SV=1	0.333038	0	0.0120912	41.644	21.263	41.644	0.333038	0	0.0120912	41.644							S	GPEPTQGEARATEEPSGTGSDELIKSDQVNG	0	0	0	0	0	0	0	0
O54724	42	O54724	O54724	Polymerase I and transcript release factor	Ptrf	sp|O54724|CAVN1_MOUSE Caveolae-associated protein 1 OS=Mus musculus OX=10090 GN=Cavin1 PE=1 SV=1	0.998795	29.1861	2.78e-168	281.65	249.15	218.28	0.990811	20.4771	2.78e-168	281.65	0.998795	29.1861	1.21e-74	218.28		1	S	TQGEARATEEPSGTGSDELIKSDQVNGVLVL	13845	13907	3173.4	15570	11340	11251	13141	15315
O54724	302	O54724	O54724	Polymerase I and transcript release factor	Ptrf	sp|O54724|CAVN1_MOUSE Caveolae-associated protein 1 OS=Mus musculus OX=10090 GN=Cavin1 PE=1 SV=1	0.838342	7.14824	0.000748881	78.324	71.626	78.324	0.838342	7.14824	0.000748881	78.324						1	S	ERREKLKTSRDKLRKSFTPDHVVYARSKTAV	107.55	158.14	122.68	122.74	0	0	110.24	255.08
O54774	754	O54774	O54774	AP-3 complex subunit delta-1	Ap3d1	sp|O54774|AP3D1_MOUSE AP-3 complex subunit delta-1 OS=Mus musculus OX=10090 GN=Ap3d1 PE=1 SV=1	0.808134	6.24861	2.99e-47	186.98	167.16	84.573	0.808134	6.24861	2.99e-47	186.98	0.499928	0	5.3e-16	144.17		1;2	S	KDKKRKKKEKGKRRHSSLPTESDEDIAPAQR	0	0	0	0	0	0	0	0
O54774	755	O54774	O54774	AP-3 complex subunit delta-1	Ap3d1	sp|O54774|AP3D1_MOUSE AP-3 complex subunit delta-1 OS=Mus musculus OX=10090 GN=Ap3d1 PE=1 SV=1	0.997647	29.2854	3.52e-94	229.9	197.74	209.39	0.985707	21.1336	3.52e-94	229.9	0.997647	29.2854	6.16e-67	209.39		1;2	S	DKKRKKKEKGKRRHSSLPTESDEDIAPAQRV	3588.5	5543.2	4873.2	3213.7	4684.5	5288.8	3911.8	4237
O54774	760	O54774	O54774	AP-3 complex subunit delta-1	Ap3d1	sp|O54774|AP3D1_MOUSE AP-3 complex subunit delta-1 OS=Mus musculus OX=10090 GN=Ap3d1 PE=1 SV=1	0.999999	59.3443	4.53e-172	287.54	263.16	178.06	0.999907	40.3263	4.53e-172	287.54	0.999999	59.3443	5.93e-129	254.61		1;2	S	KKEKGKRRHSSLPTESDEDIAPAQRVDIITE	18812	28917	18848	18232	18834	19167	18754	18796
O54781	487	O54781	O54781	SRSF protein kinase 2;SRSF protein kinase 2 N-terminal;SRSF protein kinase 2 C-terminal	Srpk2	sp|O54781|SRPK2_MOUSE SRSF protein kinase 2 OS=Mus musculus OX=10090 GN=Srpk2 PE=1 SV=2	0.98972	23.0339	0.000273832	89.301	42.04	89.301					0.98972	23.0339	0.000273832	89.301		1	S	EQEESSPSHDRSRTVSASSTGDLPKTKTRAA	0	0	0	0	0	0	0	0
O54781	489	O54781	O54781	SRSF protein kinase 2;SRSF protein kinase 2 N-terminal;SRSF protein kinase 2 C-terminal	Srpk2	sp|O54781|SRPK2_MOUSE SRSF protein kinase 2 OS=Mus musculus OX=10090 GN=Srpk2 PE=1 SV=2	0.448899	0	0.00338947	61.435	25.476	61.435	0.299898	0	0.0121081	48.741	0.448899	0	0.00338947	61.435			S	EESSPSHDRSRTVSASSTGDLPKTKTRAADL	0	0	0	0	0	0	0	0
O54781	490	O54781	O54781	SRSF protein kinase 2;SRSF protein kinase 2 N-terminal;SRSF protein kinase 2 C-terminal	Srpk2	sp|O54781|SRPK2_MOUSE SRSF protein kinase 2 OS=Mus musculus OX=10090 GN=Srpk2 PE=1 SV=2	0.953173	16.0974	1.71e-56	212.68	159.89	212.68	0.953173	16.0974	1.71e-56	212.68	0.448899	0	0.00338947	61.435		1	S	ESSPSHDRSRTVSASSTGDLPKTKTRAADLL	7744.5	8716.4	5649.1	6682	5236.2	8076.3	5165.7	6456.9
O54784	316	O54784	O54784	Death-associated protein kinase 3	Dapk3	sp|O54784|DAPK3_MOUSE Death-associated protein kinase 3 OS=Mus musculus OX=10090 GN=Dapk3 PE=1 SV=1	1	63.5379	5.14e-05	130.1	104.16	130.1	1	63.5379	5.14e-05	130.1	0.999327	31.768	0.00164379	77.597		1	S	SLKSHSSMPRNTSYASFERFSRVLEDVAAAE	4465.6	7671.5	7415.8	6887.8	3314.8	7899.6	3267.8	4987.2
O54799	352	O54799	O54799	Neuromedin-B receptor	Nmbr	sp|O54799|NMBR_MOUSE Neuromedin-B receptor OS=Mus musculus OX=10090 GN=Nmbr PE=1 SV=1	0.985947	19.5872	9.55e-144	269.28	234.89	83.314	0.985947	19.5872	0.000549152	83.314	0.944631	12.5704	9.55e-144	269.28		1	S	SQLCCGRKSYPERSTSYLLSSSAVRMTSLKS	873.1	1092.9	494.49	959.3	935.49	429.09	776.24	504.26
O54818	174	O54818	O54818	Tumor protein D53	Tpd52l1	sp|O54818|TPD53_MOUSE Tumor protein D53 OS=Mus musculus OX=10090 GN=Tpd52l1 PE=1 SV=1	0.999915	40.7637	1.05e-75	200.79	190.55	200.79	0.998537	31.0161	5.95e-24	121.28	0.999915	40.7637	1.05e-75	200.79		1	S	ASLKTKVGGTNHGGGSFEEVLNSTAHASSQN	1245.4	1017.4	805.49	716.15	849.25	990.98	769.08	1154.1
O54829	241	O54829	O54829	Regulator of G-protein signaling 7	Rgs7	sp|O54829|RGS7_MOUSE Regulator of G-protein signaling 7 OS=Mus musculus OX=10090 GN=Rgs7 PE=1 SV=2	0.76732	5.19194	0	339.18	307.8	339.18	0.76732	5.19194	0	339.18	0.753879	7.94578	3.4e-55	185.06		1;2	S	TRKSVYGLQNDIRSHSPTHTPTPETKPPTED	22143	36128	26368	23253	22743	26787	21789	19136
O54829	229	O54829	O54829	Regulator of G-protein signaling 7	Rgs7	sp|O54829|RGS7_MOUSE Regulator of G-protein signaling 7 OS=Mus musculus OX=10090 GN=Rgs7 PE=1 SV=2	1	112.727	6.13e-06	112.73	32.487	112.73	1	112.727	6.13e-06	112.73						1	S	IKKSSRMRNPHKTRKSVYGLQNDIRSHSPTH	23239	37393	22983	27120	16040	29193	14539	22398
O54916	117	O54916	O54916	RalBP1-associated Eps domain-containing protein 1	Reps1	sp|O54916|REPS1_MOUSE RalBP1-associated Eps domain-containing protein 1 OS=Mus musculus OX=10090 GN=Reps1 PE=1 SV=2	0.316895	0	0.00240418	43.176	39.514	43.176					0.316895	0	0.00240418	43.176			S	VASKNEQESRLAASYSSDSENQGSYSGVIPP	0	0	0	0	0	0	0	0
O54916	118	O54916	O54916	RalBP1-associated Eps domain-containing protein 1	Reps1	sp|O54916|REPS1_MOUSE RalBP1-associated Eps domain-containing protein 1 OS=Mus musculus OX=10090 GN=Reps1 PE=1 SV=2	0.522325	0.644333	3.15e-09	92.412	78.985	92.412	0.522325	0.644333	3.15e-09	92.412	0.316895	0	0.00240418	43.176		1	S	ASKNEQESRLAASYSSDSENQGSYSGVIPPP	257.6	228.3	244.91	234.21	347.66	258.3	103.4	152.57
O54916	120	O54916	O54916	RalBP1-associated Eps domain-containing protein 1	Reps1	sp|O54916|REPS1_MOUSE RalBP1-associated Eps domain-containing protein 1 OS=Mus musculus OX=10090 GN=Reps1 PE=1 SV=2	0.316895	0	0.00240418	43.176	39.514	43.176					0.316895	0	0.00240418	43.176			S	KNEQESRLAASYSSDSENQGSYSGVIPPPPG	0	0	0	0	0	0	0	0
O54916	390	O54916	O54916	RalBP1-associated Eps domain-containing protein 1	Reps1	sp|O54916|REPS1_MOUSE RalBP1-associated Eps domain-containing protein 1 OS=Mus musculus OX=10090 GN=Reps1 PE=1 SV=2	0.499893	0	4.69e-09	71.528	58.34	71.528	0.499893	0	4.69e-09	71.528	0.498708	0	5.39e-06	57.688			S	EDSADVGEQPGEVGYSGSPAEAPPSKSPSMP	0	0	0	0	0	0	0	0
O54916	392	O54916	O54916	RalBP1-associated Eps domain-containing protein 1	Reps1	sp|O54916|REPS1_MOUSE RalBP1-associated Eps domain-containing protein 1 OS=Mus musculus OX=10090 GN=Reps1 PE=1 SV=2	0.499893	0	4.69e-09	71.528	58.34	71.528	0.499893	0	4.69e-09	71.528	0.498708	0	5.39e-06	57.688			S	SADVGEQPGEVGYSGSPAEAPPSKSPSMPSL	0	0	0	0	0	0	0	0
O54916	708	O54916	O54916	RalBP1-associated Eps domain-containing protein 1	Reps1	sp|O54916|REPS1_MOUSE RalBP1-associated Eps domain-containing protein 1 OS=Mus musculus OX=10090 GN=Reps1 PE=1 SV=2	1	107.32	2.57e-27	158.15	133.36	158.15	0.999818	37.3912	0.00116329	54.271	1	107.32	2.57e-27	158.15		1	S	TPLAPPPKPVRRRLKSEDELRPDVDEHTQKT	1110.3	1836.1	1003.2	1025.2	745.78	798.93	689.67	874.31
O54916;Q80XA6	766;618	O54916;Q80XA6	O54916	RalBP1-associated Eps domain-containing protein 1;RalBP1-associated Eps domain-containing protein 2	Reps1;Reps2	sp|O54916|REPS1_MOUSE RalBP1-associated Eps domain-containing protein 1 OS=Mus musculus OX=10090 GN=Reps1 PE=1 SV=2;sp|Q80XA6|REPS2_MOUSE RalBP1-associated Eps domain-containing protein 2 OS=Mus musculus OX=10090 GN=Reps2 PE=1 SV=2	1	40.5891	0.0411422	40.589	14.47	40.589					1	40.5891	0.0411422	40.589		1	S	IRKNKEANAVLARLNSELQQQLKEVHQERIA;IRRNKETNTVLARLNSELQQQLKDVLEERIS	0	0	0	0	0	0	0	0
O54916	272	O54916	O54916	RalBP1-associated Eps domain-containing protein 1	Reps1	sp|O54916|REPS1_MOUSE RalBP1-associated Eps domain-containing protein 1 OS=Mus musculus OX=10090 GN=Reps1 PE=1 SV=2	0.947392	14.327	1.81e-17	165.58	137.62	165.58	0.947392	14.327	1.81e-17	165.58	0.716953	5.86989	2.18e-08	129.71		1	S	RTVASAATANEIRRQSSSYEDPWKITDEQRQ	6843.8	8246.5	2564.5	7628.9	4641.9	8007.9	4863.9	6968.6
O54916	273	O54916	O54916	RalBP1-associated Eps domain-containing protein 1	Reps1	sp|O54916|REPS1_MOUSE RalBP1-associated Eps domain-containing protein 1 OS=Mus musculus OX=10090 GN=Reps1 PE=1 SV=2	0.67123	3.95944	5.37e-21	135.04	114.82	135.04					0.67123	3.95944	5.37e-21	135.04		1	S	TVASAATANEIRRQSSSYEDPWKITDEQRQY	0	0	0	0	0	0	0	0
O54916	482	O54916	O54916	RalBP1-associated Eps domain-containing protein 1	Reps1	sp|O54916|REPS1_MOUSE RalBP1-associated Eps domain-containing protein 1 OS=Mus musculus OX=10090 GN=Reps1 PE=1 SV=2	0.505014	0.435109	5.29e-07	81.373	66.119	48.547					0.505014	0.435109	5.29e-07	81.373		1	S	EMELKRTSSDHTNPTSPLLVKPSDLSEENKI	0	0	0	0	0	0	0	0
O54916	539	O54916	O54916	RalBP1-associated Eps domain-containing protein 1	Reps1	sp|O54916|REPS1_MOUSE RalBP1-associated Eps domain-containing protein 1 OS=Mus musculus OX=10090 GN=Reps1 PE=1 SV=2	0.681708	6.51193	7.53e-07	77.681	68.023	64.315	0.681708	6.51193	7.53e-07	77.681	0.473482	0	5.64e-05	51.526		1	S	QIGSSVTRQRSHSGTSPDNTAPPPPPPRPQP	329.74	435.99	277.32	456.01	232.12	407.47	525.37	240.78
O54931	191	O54931	O54931	A-kinase anchor protein 2	Akap2	sp|O54931|AKAP2_MOUSE PALM2-AKAP2 fusion protein OS=Mus musculus OX=10090 GN=Pakap PE=1 SV=4	0.998594	28.5271	7.77e-58	209.84	173.42	165.34	0.997561	26.1266	1.17e-36	188.59	0.998594	28.5271	7.77e-58	209.84		1	S	DNCGDSRLEPAASSLSPDHKNMEIGVSVAEC	8367.8	13076	2488.6	5268.2	11380	8272.8	8111	7994.8
O54931	846	O54931	O54931	A-kinase anchor protein 2	Akap2	sp|O54931|AKAP2_MOUSE PALM2-AKAP2 fusion protein OS=Mus musculus OX=10090 GN=Pakap PE=1 SV=4	0.566083	1.15474	0.000717328	57.482	39.118	57.482					0.566083	1.15474	0.000717328	57.482		1	S	PGSEKPQGMFAPPQVSSPVQEKRDILPKNLP	0	0	0	0	0	0	0	0
O54931	847	O54931	O54931	A-kinase anchor protein 2	Akap2	sp|O54931|AKAP2_MOUSE PALM2-AKAP2 fusion protein OS=Mus musculus OX=10090 GN=Pakap PE=1 SV=4	0.5	0	0.00228411	51.286	27.91	51.286					0.5	0	0.00228411	51.286		1	S	GSEKPQGMFAPPQVSSPVQEKRDILPKNLPA	0	0	0	0	0	0	0	0
O54931	995	O54931	O54931	A-kinase anchor protein 2	Akap2	sp|O54931|AKAP2_MOUSE PALM2-AKAP2 fusion protein OS=Mus musculus OX=10090 GN=Pakap PE=1 SV=4	0.80104	7.52525	0.000319946	45.187	37.717	45.187					0.80104	7.52525	0.000319946	45.187		1	S	YKTAPGKIEKVKPPPSPTTEGPSLQPDLAPE	0	0	0	0	0	0	0	0
O54940	114	O54940	O54940	BCL2/adenovirus E1B 19 kDa protein-interacting protein 2	Bnip2	sp|O54940|BNIP2_MOUSE BCL2/adenovirus E1B 19 kDa protein-interacting protein 2 OS=Mus musculus OX=10090 GN=Bnip2 PE=1 SV=2	0.990659	20.3903	0.000188615	86.455	67.622	68.83	0.87574	8.64227	0.000284862	77.562	0.990659	20.3903	0.000188615	86.455		1	S	DDLPKPKTTEVIRKGSITEYTATEEKGDGRR	927.66	1607.8	553.84	976.22	993.55	1587.2	796.8	1097.4
O54988	647	O54988	O54988	STE20-like serine/threonine-protein kinase	Slk	sp|O54988|SLK_MOUSE STE20-like serine/threonine-protein kinase OS=Mus musculus OX=10090 GN=Slk PE=1 SV=2	0.695748	4.74984	3.95e-05	52.669	45.047	52.669	0.695748	4.74984	3.95e-05	52.669						1	S	EQPETDEVEQVSESNSIEELERLVVTGAEAR	81.528	78.892	90.043	84.417	169.12	0	91.44	80.968
O54988	341	O54988	O54988	STE20-like serine/threonine-protein kinase	Slk	sp|O54988|SLK_MOUSE STE20-like serine/threonine-protein kinase OS=Mus musculus OX=10090 GN=Slk PE=1 SV=2	0.5313	1.43303	0.000327185	69.361	49.105	69.361					0.5313	1.43303	0.000327185	69.361		1	S	EAENALPIPANKRASSDLSIASSEEDKLSQN	0	0	0	0	0	0	0	0
O54991	1382	O54991	O54991	Contactin-associated protein 1	Cntnap1	sp|O54991|CNTP1_MOUSE Contactin-associated protein 1 OS=Mus musculus OX=10090 GN=Cntnap1 PE=1 SV=2	0.5	0	0.000326196	97.797	58.578	97.797	0.5	0	0.000326196	97.797						1	S	GPGPRDQNLPQILEESRSE____________	954.02	2610.8	1772.7	1654.5	1183.6	1764.9	1223.2	1199.2
O54991	1384	O54991	O54991	Contactin-associated protein 1	Cntnap1	sp|O54991|CNTP1_MOUSE Contactin-associated protein 1 OS=Mus musculus OX=10090 GN=Cntnap1 PE=1 SV=2	0.999122	30.5589	2.77e-22	152.37	103.75	152.37	0.994997	22.9857	2.13e-15	137.61	0.999122	30.5589	2.77e-22	152.37		1	S	GPRDQNLPQILEESRSE______________	1464.9	3617.5	2681.1	2325.9	1958.9	2820.9	1926.7	1945.6
O55003	79	O55003	O55003	BCL2/adenovirus E1B 19 kDa protein-interacting protein 3	Bnip3	sp|O55003|BNIP3_MOUSE BCL2/adenovirus E1B 19 kDa protein-interacting protein 3 OS=Mus musculus OX=10090 GN=Bnip3 PE=1 SV=1	0.996572	24.6345	2.14e-13	153.38	131.15	82.069					0.996572	24.6345	2.14e-13	153.38		1	S	SQTPQDTNRAEIDSHSFGEKNSTLSEEDYIE	0	0	0	0	0	0	0	0
O55003	48	O55003	O55003	BCL2/adenovirus E1B 19 kDa protein-interacting protein 3	Bnip3	sp|O55003|BNIP3_MOUSE BCL2/adenovirus E1B 19 kDa protein-interacting protein 3 OS=Mus musculus OX=10090 GN=Bnip3 PE=1 SV=1	1	53.4477	0.000790066	77.644	65.408	53.448	1	53.4477	0.000790066	77.644	1	63.0912	0.00094408	75.102		1	S	YNGDMEKILLDAQHESGRSSSKSSHCDSPPR	1107	1570.9	1112.7	1229	682.98	1378.5	602.86	960.55
O55003	88	O55003	O55003	BCL2/adenovirus E1B 19 kDa protein-interacting protein 3	Bnip3	sp|O55003|BNIP3_MOUSE BCL2/adenovirus E1B 19 kDa protein-interacting protein 3 OS=Mus musculus OX=10090 GN=Bnip3 PE=1 SV=1	0.999794	36.8791	5.55e-27	180.95	146.19	165.64	0.999794	36.8791	4.6e-19	165.64	0.999001	30.0433	5.55e-27	180.95		1	S	AEIDSHSFGEKNSTLSEEDYIERRREVESIL	4819.2	8370.4	5499.6	6733.2	4604.9	6756.7	3793.1	6424.1
O55017	1929	O55017	O55017	Voltage-dependent N-type calcium channel subunit alpha-1B	Cacna1b	sp|O55017|CAC1B_MOUSE Voltage-dependent N-type calcium channel subunit alpha-1B OS=Mus musculus OX=10090 GN=Cacna1b PE=1 SV=1	0.992836	21.4199	1.19e-05	132.88	95.317	132.88	0.992836	21.4199	1.19e-05	132.88						1	S	GGAIQTQESGIKESLSWGTQRTQDALYEARA	2411.2	4747.8	913.9	3248.3	2181.5	2814.3	1740.3	2511.8
O55017	745	O55017	O55017	Voltage-dependent N-type calcium channel subunit alpha-1B	Cacna1b	sp|O55017|CAC1B_MOUSE Voltage-dependent N-type calcium channel subunit alpha-1B OS=Mus musculus OX=10090 GN=Cacna1b PE=1 SV=1	0.873255	8.93718	0.00110146	56.225	44.377	56.225					0.873255	8.93718	0.00110146	56.225		1	S	NQKLALQKAKEVAEVSPMSAANISIAARQQN	0	0	0	0	0	0	0	0
O55017	748	O55017	O55017	Voltage-dependent N-type calcium channel subunit alpha-1B	Cacna1b	sp|O55017|CAC1B_MOUSE Voltage-dependent N-type calcium channel subunit alpha-1B OS=Mus musculus OX=10090 GN=Cacna1b PE=1 SV=1	0.685993	3.50553	9.91e-05	80.69	62.588	80.69					0.685993	3.50553	9.91e-05	80.69		1	S	LALQKAKEVAEVSPMSAANISIAARQQNSAK	0	0	0	0	0	0	0	0
O55017	753	O55017	O55017	Voltage-dependent N-type calcium channel subunit alpha-1B	Cacna1b	sp|O55017|CAC1B_MOUSE Voltage-dependent N-type calcium channel subunit alpha-1B OS=Mus musculus OX=10090 GN=Cacna1b PE=1 SV=1	0.479034	0	0.00282105	48.004	18.917	48.004					0.479034	0	0.00282105	48.004			S	AKEVAEVSPMSAANISIAARQQNSAKARSVW	0	0	0	0	0	0	0	0
O55017	1951	O55017	O55017	Voltage-dependent N-type calcium channel subunit alpha-1B	Cacna1b	sp|O55017|CAC1B_MOUSE Voltage-dependent N-type calcium channel subunit alpha-1B OS=Mus musculus OX=10090 GN=Cacna1b PE=1 SV=1	0.993475	25.289	0.000405917	43.501	28.339	43.501					0.993475	25.289	0.000405917	43.501		1	S	QDALYEARAPLERGHSAEIPVGQSGTLAVDV	0	0	0	0	0	0	0	0
O55017	2221	O55017	O55017	Voltage-dependent N-type calcium channel subunit alpha-1B	Cacna1b	sp|O55017|CAC1B_MOUSE Voltage-dependent N-type calcium channel subunit alpha-1B OS=Mus musculus OX=10090 GN=Cacna1b PE=1 SV=1	1	164.038	4.21e-18	164.04	111.76	164.04	1	164.038	4.21e-18	164.04	1	56.5506	0.00850512	56.551		1	S	SGLPAFSPGRLSRGLSEHNALLQKEPLSQPL	1602.2	3701.6	901.01	3085.3	834.7	2958.1	744.16	2249.9
O55017	2062	O55017	O55017	Voltage-dependent N-type calcium channel subunit alpha-1B	Cacna1b	sp|O55017|CAC1B_MOUSE Voltage-dependent N-type calcium channel subunit alpha-1B OS=Mus musculus OX=10090 GN=Cacna1b PE=1 SV=1	0.927464	11.3098	0.000336598	42.024	36.183	42.024					0.927464	11.3098	0.000336598	42.024		1	S	HRRRDKKQRSLEKGPSLSVDPEGAPSTAAGP	0	0	0	0	0	0	0	0
O55017	2244	O55017	O55017	Voltage-dependent N-type calcium channel subunit alpha-1B	Cacna1b	sp|O55017|CAC1B_MOUSE Voltage-dependent N-type calcium channel subunit alpha-1B OS=Mus musculus OX=10090 GN=Cacna1b PE=1 SV=1	1	172.098	5.4e-55	205.32	172.32	172.1	1	172.098	3.59e-23	172.1	1	205.317	5.4e-55	205.32		1	S	KEPLSQPLAPGSRIGSDPYLGQRLDSEASAH	7746	12471	10657	8523	5484.8	6894.4	4829.6	7189.7
O55017	783	O55017	O55017	Voltage-dependent N-type calcium channel subunit alpha-1B	Cacna1b	sp|O55017|CAC1B_MOUSE Voltage-dependent N-type calcium channel subunit alpha-1B OS=Mus musculus OX=10090 GN=Cacna1b PE=1 SV=1	0.995405	23.3571	0.00209431	41.76	28.168	41.76	0.995405	23.3571	0.00209431	41.76						1	S	WEQRASQLRLQNLRASCEALYSEMDPEERLR	99.86	359.13	184.02	235.53	120.06	248.4	143.75	213.93
O55017	1907	O55017	O55017	Voltage-dependent N-type calcium channel subunit alpha-1B	Cacna1b	sp|O55017|CAC1B_MOUSE Voltage-dependent N-type calcium channel subunit alpha-1B OS=Mus musculus OX=10090 GN=Cacna1b PE=1 SV=1	0.957902	16.6898	2.47e-10	124.26	92.871	124.26	0.899855	12.678	7.85e-06	96.447	0.957902	16.6898	2.47e-10	124.26		1	S	QPAVLRGARVFLRQKSATSLSNGGAIQTQES	1222	2173.2	578.42	1804.1	1119.7	2158.2	1204.8	1937.9
O55017	1910	O55017	O55017	Voltage-dependent N-type calcium channel subunit alpha-1B	Cacna1b	sp|O55017|CAC1B_MOUSE Voltage-dependent N-type calcium channel subunit alpha-1B OS=Mus musculus OX=10090 GN=Cacna1b PE=1 SV=1	0.318934	0	7.42e-05	70.335	59.073	70.335					0.318934	0	7.42e-05	70.335			S	VLRGARVFLRQKSATSLSNGGAIQTQESGIK	0	0	0	0	0	0	0	0
O55017	411	O55017	O55017	Voltage-dependent N-type calcium channel subunit alpha-1B	Cacna1b	sp|O55017|CAC1B_MOUSE Voltage-dependent N-type calcium channel subunit alpha-1B OS=Mus musculus OX=10090 GN=Cacna1b PE=1 SV=1	1	49.418	0.00679892	77.732	41.537	49.418	1	49.418	0.0439806	49.418	1	77.7321	0.00679892	77.732		1	S	EEVMLAEEDKNAEEKSPLDVLKRAATKKSRN	380.3	255.25	0	492.35	671.82	270.04	428.91	462.12
O55017	773	O55017	O55017	Voltage-dependent N-type calcium channel subunit alpha-1B	Cacna1b	sp|O55017|CAC1B_MOUSE Voltage-dependent N-type calcium channel subunit alpha-1B OS=Mus musculus OX=10090 GN=Cacna1b PE=1 SV=1	0.999991	50.5253	0.000422093	83.729	63.348	83.729	0.999991	50.5253	0.000422093	83.729						1	S	QQNSAKARSVWEQRASQLRLQNLRASCEALY	828.44	1167	781.09	981.81	377.48	460.9	298.77	733.55
O55017	2197	O55017	O55017	Voltage-dependent N-type calcium channel subunit alpha-1B	Cacna1b	sp|O55017|CAC1B_MOUSE Voltage-dependent N-type calcium channel subunit alpha-1B OS=Mus musculus OX=10090 GN=Cacna1b PE=1 SV=1	0.827655	7.13432	5.9e-16	123.19	112.04	123.19	0.827655	7.13432	5.9e-16	123.19						1	S	PLTPRPSITYKTANSSPVHFAEGQSGLPAFS	536.76	742.48	390.42	501.93	384.27	717.02	415.33	553.72
O55022	181	O55022	O55022	Membrane-associated progesterone receptor component 1	Pgrmc1	sp|O55022|PGRC1_MOUSE Membrane-associated progesterone receptor component 1 OS=Mus musculus OX=10090 GN=Pgrmc1 PE=1 SV=4	1	68.772	4.08e-229	305.18	272.1	287.81	1	65.9927	4.08e-229	305.18	1	68.772	7.07e-205	298.23		1	S	HVGKLLKEGEEPTVYSDDEEPKDETARKNE_	99470	80513	74072	99009	74440	74098	93051	65858
O55023	37	O55023	O55023	Inositol monophosphatase 1	Impa1	sp|O55023|IMPA1_MOUSE Inositol monophosphatase 1 OS=Mus musculus OX=10090 GN=Impa1 PE=1 SV=1	0.993867	22.0964	0	342.58	247.1	342.58	0.499999	0	1.56e-11	128.54	0.993867	22.0964	0	342.58		1	S	MIREALKNEMDVMIKSSPADLVTVTDQKVEK	1259.5	1934.4	197.68	1319.2	1120.6	1349.7	912.07	1153.4
O55023	38	O55023	O55023	Inositol monophosphatase 1	Impa1	sp|O55023|IMPA1_MOUSE Inositol monophosphatase 1 OS=Mus musculus OX=10090 GN=Impa1 PE=1 SV=1	0.763968	5.10104	9.74e-72	225.79	134.48	225.79	0.499999	0	1.56e-11	128.54	0.763968	5.10104	9.74e-72	225.79		1	S	IREALKNEMDVMIKSSPADLVTVTDQKVEKM	1259.5	1934.4	197.68	1319.2	1120.6	1349.7	912.07	1153.4
O55028	31	O55028	O55028	[3-methyl-2-oxobutanoate dehydrogenase [lipoamide]] kinase
O55028	33	O55028	O55028	[3-methyl-2-oxobutanoate dehydrogenase [lipoamide]] kinase
O55029	859	O55029	O55029	Coatomer subunit beta'	Copb2	sp|O55029|COPB2_MOUSE Coatomer subunit beta' OS=Mus musculus OX=10090 GN=Copb2 PE=1 SV=2	0.49872	0	3.85e-13	78.228	62.34	78.228					0.49872	0	3.85e-13	78.228			S	PSRPTAQQEPDGKPASSPVIMASQTTHKEEK	0	0	0	0	0	0	0	0
O55029	860	O55029	O55029	Coatomer subunit beta'	Copb2	sp|O55029|COPB2_MOUSE Coatomer subunit beta' OS=Mus musculus OX=10090 GN=Copb2 PE=1 SV=2	0.49872	0	3.85e-13	78.228	62.34	78.228					0.49872	0	3.85e-13	78.228			S	SRPTAQQEPDGKPASSPVIMASQTTHKEEKS	0	0	0	0	0	0	0	0
O55042;Q91ZZ3	42;42	O55042;Q91ZZ3	Q91ZZ3	Alpha-synuclein;Beta-synuclein	Snca;Sncb	sp|O55042|SYUA_MOUSE Alpha-synuclein OS=Mus musculus OX=10090 GN=Snca PE=1 SV=2;sp|Q91ZZ3|SYUB_MOUSE Beta-synuclein OS=Mus musculus OX=10090 GN=Sncb PE=1 SV=1	1	83.3966	0.000283308	94.465	36.095	83.397	1	83.3966	0.00112571	83.397	1	94.4653	0.000283308	94.465		1	S	AEAAGKTKEGVLYVGSKTKEGVVHGVTTVAE;TEAAEKTKEGVLYVGSKTSGVVQGVASVAEK	1933.9	3769.1	778.94	3502.6	1489.6	3729.6	2077	2998.6
O55060	34	O55060	O55060	Thiopurine S-methyltransferase	Tpmt	sp|O55060|TPMT_MOUSE Thiopurine S-methyltransferase OS=Mus musculus OX=10090 GN=Tpmt PE=1 SV=1	1	83.1055	0.000257006	83.106	63.267	83.106	1	83.1055	0.000258222	83.106	1	52.0261	0.000257006	82.59		1	S	LTLEDWKEKWVTRHISFHQEQGHQLLKKHLD	736.93	1356.6	640.36	1456.5	809.57	1314.6	881.08	911.46
O55091	137	O55091	O55091	Protein IMPACT	Impact	sp|O55091|IMPCT_MOUSE Protein IMPACT OS=Mus musculus OX=10090 GN=Impact PE=1 SV=2	0.999973	45.6682	1.68e-16	130.6	115.08	130.6	0.999973	45.6682	1.68e-16	130.6	0.99995	42.9763	2.52e-16	125.52		1	S	PDPDVKKKTEEVEVESEEDPILEHPPENPVK	654.25	1116.3	562.2	791.09	1213.5	374.95	790.99	618.79
O55106	190	O55106	O55106	Striatin	Strn	sp|O55106|STRN_MOUSE Striatin OS=Mus musculus OX=10090 GN=Strn PE=1 SV=2	0.491112	0	0.000332535	68.187	47.025	68.187					0.491112	0	0.000332535	68.187			S	ILDVKSKRVRALLGFSSDVTDREDDKNQDSV	0	0	0	0	0	0	0	0
O55106	191	O55106	O55106	Striatin	Strn	sp|O55106|STRN_MOUSE Striatin OS=Mus musculus OX=10090 GN=Strn PE=1 SV=2	0.491112	0	0.000332535	68.187	47.025	68.187					0.491112	0	0.000332535	68.187			S	LDVKSKRVRALLGFSSDVTDREDDKNQDSVI	0	0	0	0	0	0	0	0
O55106	259	O55106	O55106	Striatin	Strn	sp|O55106|STRN_MOUSE Striatin OS=Mus musculus OX=10090 GN=Strn PE=1 SV=2	0.999715	35.5798	1.7e-12	119.45	80.3	119.45	0.997668	31.0844	0.00370749	66.595	0.999715	35.5798	1.7e-12	119.45		1	S	VSDEDEDEDTDGRAKSVIDTSTIVRKKALPD	693.63	722.41	0	962.78	309.33	716.54	357.12	664.79
O55131	422	O55131	O55131	Septin-7	2025-09-07	sp|O55131|SEPT7_MOUSE Septin-7 OS=Mus musculus OX=10090 GN=Septin7 PE=1 SV=1	0.957025	13.4771	0.00102649	84.507	77.108	84.507	0.957025	13.4771	0.00102649	84.507	0.333333	0	0.00361011	69.602		1	S	KANWEAQQRILEQQNSSRTLEKNKKKGKIF_	649.47	2423.2	472.24	1226.3	965.3	1113.4	413.3	1295.9
O55131	423	O55131	O55131	Septin-7	2025-09-07	sp|O55131|SEPT7_MOUSE Septin-7 OS=Mus musculus OX=10090 GN=Septin7 PE=1 SV=1	0.333333	0	0.00361011	69.602	48.7	69.602					0.333333	0	0.00361011	69.602			S	ANWEAQQRILEQQNSSRTLEKNKKKGKIF__	0	0	0	0	0	0	0	0
O55131	333	O55131	O55131	Septin-7	2025-09-07	sp|O55131|SEPT7_MOUSE Septin-7 OS=Mus musculus OX=10090 GN=Septin7 PE=1 SV=1	1	147.388	2.5e-13	151.66	126.19	147.39	1	147.388	2.5e-13	147.39	1	127.174	1.87e-12	151.66		1	S	YNGVDNNKNKGQLTKSPLAQMEEERREHVAK	10353	16889	3146.4	9024.8	10091	11501	8928.4	11355
O55137	416	O55137	O55137	Acyl-coenzyme A thioesterase 1	Acot1	sp|O55137|ACOT1_MOUSE Acyl-coenzyme A thioesterase 1 OS=Mus musculus OX=10090 GN=Acot1 PE=1 SV=1	0.999999	62.7666	1.39e-06	104.17	90.204	104.17					0.999999	62.7666	1.39e-06	104.17		1	S	QTFFHKQLGSECLHVSPKI____________	0	0	0	0	0	0	0	0
O55137;Q32Q92;Q8BWN8;Q6Q2Z6;Q9QYR7	56;56;56;56;67	O55137	O55137	Acyl-coenzyme A thioesterase 1;Acyl-coenzyme A thioesterase 6;Acyl-coenzyme A thioesterase 4;Acyl-coenzyme A thioesterase 5;Acyl-coenzyme A thioesterase 3	Acot1;Acot6;Acot4;Acot5;Acot3	sp|O55137|ACOT1_MOUSE Acyl-coenzyme A thioesterase 1 OS=Mus musculus OX=10090 GN=Acot1 PE=1 SV=1;sp|Q32Q92|ACOT6_MOUSE Acyl-coenzyme A thioesterase 6 OS=Mus musculus OX=10090 GN=Acot6 PE=1 SV=1;sp|Q8BWN8|ACOT4_MOUSE Peroxisomal succinyl-coenzyme A thioeste	1	48.1404	0.00277574	52.453	34.752	48.14					1	48.1404	0.00277574	52.453		1	S	EKGALFRAHARYRADSHGELDLARTPALGGS	0	0	0	0	0	0	0	0
O55143	661	O55143	O55143	Sarcoplasmic/endoplasmic reticulum calcium ATPase 2	Atp2a2	sp|O55143|AT2A2_MOUSE Sarcoplasmic/endoplasmic reticulum calcium ATPase 2 OS=Mus musculus OX=10090 GN=Atp2a2 PE=1 SV=2	0.992233	21.0636	1.91e-24	169.65	145.4	142.08	0.992233	21.0636	1.77e-10	142.08	0.990453	20.1597	1.91e-24	169.65		1	S	DVTSKAFTGREFDELSPSAQRDACLNARCFA	867.75	2598.2	1606.6	1419.4	1561.9	2188.7	1610.2	1822.9
O55143	663	O55143	O55143	Sarcoplasmic/endoplasmic reticulum calcium ATPase 2	Atp2a2	sp|O55143|AT2A2_MOUSE Sarcoplasmic/endoplasmic reticulum calcium ATPase 2 OS=Mus musculus OX=10090 GN=Atp2a2 PE=1 SV=2	0.999996	53.6114	2.95e-85	231.05	187.77	231.05	0.999875	39.0173	5.78e-66	208.39	0.999996	53.6114	2.95e-85	231.05		1	S	TSKAFTGREFDELSPSAQRDACLNARCFARV	5586.8	10078	7366.6	7288.4	4891.8	8818.7	5785	7771.5
O55143	553	O55143	O55143	Sarcoplasmic/endoplasmic reticulum calcium ATPase 2	Atp2a2	sp|O55143|AT2A2_MOUSE Sarcoplasmic/endoplasmic reticulum calcium ATPase 2 OS=Mus musculus OX=10090 GN=Atp2a2 PE=1 SV=2	0.718717	5.21684	6.44e-06	113.69	86.162	113.69	0.718717	5.21684	6.44e-06	113.69						1	S	PGVKQKIMSVIREWGSGSDTLRCLALATHDN	1379.6	2394.1	1773.2	1776.2	718.77	2288.9	804.37	1650.3
O55143	555	O55143	O55143	Sarcoplasmic/endoplasmic reticulum calcium ATPase 2	Atp2a2	sp|O55143|AT2A2_MOUSE Sarcoplasmic/endoplasmic reticulum calcium ATPase 2 OS=Mus musculus OX=10090 GN=Atp2a2 PE=1 SV=2	0.825938	7.16956	0.00370749	66.595	38.583	66.595	0.825938	7.16956	0.00370749	66.595						1	S	VKQKIMSVIREWGSGSDTLRCLALATHDNPL	373.86	678.06	648.01	745.28	177.96	543.06	162.05	557.82
O55201	664	O55201	O55201	Transcription elongation factor SPT5	Supt5h	sp|O55201|SPT5H_MOUSE Transcription elongation factor SPT5 OS=Mus musculus OX=10090 GN=Supt5h PE=1 SV=1	0.996664	24.8997	0.000208175	95.428	81.766	95.428					0.996664	24.8997	0.000208175	95.428		1	S	PRDVTNLTVGGFTPMSPRISSPMHPSAEGQH	0	0	0	0	0	0	0	0
O70133	136	O70133	O70133	ATP-dependent RNA helicase A	Dhx9	sp|O70133|DHX9_MOUSE ATP-dependent RNA helicase A OS=Mus musculus OX=10090 GN=Dhx9 PE=1 SV=2	0.999973	46.7008	4.37e-108	229.07	202.6	210.66	0.999797	36.9686	4.37e-108	229.07	0.999973	46.7008	4.01e-82	210.66		1	S	KAEENNSGVESSGYGSPGPTWDRGANLKDYY	2029.5	2652.2	2116.2	2097.1	1649.6	1460.7	1343.4	1544.4
O70139	57	O70139	O70139	cAMP-dependent protein kinase inhibitor gamma	Pkig	sp|O70139|IPKG_MOUSE cAMP-dependent protein kinase inhibitor gamma OS=Mus musculus OX=10090 GN=Pkig PE=1 SV=1	0.5	0	0.000818035	43.799	32.896	43.799					0.5	0	0.000818035	43.799		1	S	MGELALEGAEGQAEGSTPDKEASSQPESSDA	0	0	0	0	0	0	0	0
O70146	439	O70146	O70146	Dual specificity testis-specific protein kinase 1	Tesk1	sp|O70146|TESK1_MOUSE Dual specificity testis-specific protein kinase 1 OS=Mus musculus OX=10090 GN=Tesk1 PE=1 SV=3	0.907268	12.9154	0.0161325	49.5	24.646	49.5	0.907268	12.9154	0.0161325	49.5						1	S	PDILVQPETPVRRCRSLPSSPELPRRMETAL	524.16	1124.8	605.76	595.67	930.55	580.51	733.82	619.24
O70146	443	O70146	O70146	Dual specificity testis-specific protein kinase 1	Tesk1	sp|O70146|TESK1_MOUSE Dual specificity testis-specific protein kinase 1 OS=Mus musculus OX=10090 GN=Tesk1 PE=1 SV=3	0.977612	16.4081	1.36e-08	144.77	98.767	121.6	0.977612	16.4081	9.03e-06	121.6	0.893096	9.21936	1.36e-08	144.77		1	S	VQPETPVRRCRSLPSSPELPRRMETALPGPG	811.89	1037	961.12	1164.7	1133.2	1046.6	759.75	1086.9
O70161	554	O70161	O70161	Phosphatidylinositol 4-phosphate 5-kinase type-1 gamma	Pip5k1c	sp|O70161|PI51C_MOUSE Phosphatidylinositol 4-phosphate 5-kinase type-1 gamma OS=Mus musculus OX=10090 GN=Pip5k1c PE=1 SV=2	0.980002	17.4193	2.42e-141	255.34	197.53	255.34	0.980002	17.4193	2.42e-141	255.34	0.960341	15.5244	3.03e-94	220.05		1	S	PSDTSEQPRYRRRTQSSGQDGRPQEEPHAED	118900	157240	81202	114940	60428	92573	60188	92118
O70161	555	O70161	O70161	Phosphatidylinositol 4-phosphate 5-kinase type-1 gamma	Pip5k1c	sp|O70161|PI51C_MOUSE Phosphatidylinositol 4-phosphate 5-kinase type-1 gamma OS=Mus musculus OX=10090 GN=Pip5k1c PE=1 SV=2	0.652214	3.33452	1.98e-123	242.47	214.73	242.47	0.652214	3.33452	1.98e-123	242.47	0.492089	0	3.03e-94	220.05		1	S	SDTSEQPRYRRRTQSSGQDGRPQEEPHAEDL	34830	55233	24969	32348	29346	29483	21552	29356
O70166	50	O70166	O70166	Stathmin-3	Stmn3	sp|O70166|STMN3_MOUSE Stathmin-3 OS=Mus musculus OX=10090 GN=Stmn3 PE=1 SV=1	0.999275	31.3921	4.03e-09	113.07	84.863	113.07	0.982254	17.4312	0.0384537	55.452	0.999275	31.3921	4.03e-09	113.07		1	S	YQYGDMEVKQLDKRASGQSFEVILKSPSDLS	474.52	499.73	284.39	452.16	637.36	658.78	666.57	738.71
O70166	53	O70166	O70166	Stathmin-3	Stmn3	sp|O70166|STMN3_MOUSE Stathmin-3 OS=Mus musculus OX=10090 GN=Stmn3 PE=1 SV=1	0.995399	23.3519	0.00218711	58.752	35.148	52.693	0.561464	1.07317	0.00218711	58.752	0.995399	23.3519	0.0111879	52.693		1	S	GDMEVKQLDKRASGQSFEVILKSPSDLSPES	384.74	490.32	308.8	339.68	572.78	709.04	630.81	479.69
O70166	81	O70166	O70166	Stathmin-3	Stmn3	sp|O70166|STMN3_MOUSE Stathmin-3 OS=Mus musculus OX=10090 GN=Stmn3 PE=1 SV=1	1	93.9582	3.4e-10	135.37	64.957	93.958	1	110.387	0.00022286	110.39	1	93.9582	3.4e-10	135.37		1	S	PESPVLSSPPKRKDASLEELQKRLEAAEERR	3152.1	3094.2	1016.8	2984.9	1944.8	2305.7	1913.5	2592.4
O70166	60	O70166	O70166	Stathmin-3	Stmn3	sp|O70166|STMN3_MOUSE Stathmin-3 OS=Mus musculus OX=10090 GN=Stmn3 PE=1 SV=1	0.880972	9.36597	0.000253589	78.285	59.074	78.285	0.880972	9.36597	0.000253589	78.285	0.635547	5.21696	0.000322763	72.898		1	S	LDKRASGQSFEVILKSPSDLSPESPVLSSPP	230.63	354.96	87.003	487.7	322.89	382.89	465.8	243.4
O70166	62	O70166	O70166	Stathmin-3	Stmn3	sp|O70166|STMN3_MOUSE Stathmin-3 OS=Mus musculus OX=10090 GN=Stmn3 PE=1 SV=1	0.40872	0	0.000503486	62.377	44.941	62.377	0.40872	0	0.000503486	62.377							S	KRASGQSFEVILKSPSDLSPESPVLSSPPKR	0	0	0	0	0	0	0	0
O70166	65	O70166	O70166	Stathmin-3	Stmn3	sp|O70166|STMN3_MOUSE Stathmin-3 OS=Mus musculus OX=10090 GN=Stmn3 PE=1 SV=1	0.839988	9.26289	9.73e-10	121.99	101.88	121.99					0.839988	9.26289	9.73e-10	121.99		1	S	SGQSFEVILKSPSDLSPESPVLSSPPKRKDA	0	0	0	0	0	0	0	0
O70166	68	O70166	O70166	Stathmin-3	Stmn3	sp|O70166|STMN3_MOUSE Stathmin-3 OS=Mus musculus OX=10090 GN=Stmn3 PE=1 SV=1	0.989446	21.8105	0.000202257	82.908	67.642	82.908	0.989446	21.8105	0.000235851	82.908	0.961753	15.128	0.000202257	79.022		1;2	S	SFEVILKSPSDLSPESPVLSSPPKRKDASLE	916.34	1196.3	908.86	852.24	720.74	896.5	786.77	796.21
O70166	72	O70166	O70166	Stathmin-3	Stmn3	sp|O70166|STMN3_MOUSE Stathmin-3 OS=Mus musculus OX=10090 GN=Stmn3 PE=1 SV=1	0.892877	9.21003	3.06e-05	105.19	79.474	105.19	0.634429	2.37376	0.00305666	82.908	0.892877	9.21003	3.06e-05	105.19		1;2	S	ILKSPSDLSPESPVLSSPPKRKDASLEELQK	0	0	0	0	0	0	0	0
O70166	73	O70166	O70166	Stathmin-3	Stmn3	sp|O70166|STMN3_MOUSE Stathmin-3 OS=Mus musculus OX=10090 GN=Stmn3 PE=1 SV=1	0.786359	5.51761	0.000919953	57.288	42.316	57.288	0.469484	0	0.00305666	48.741	0.786359	5.51761	0.000919953	57.288		1;2	S	LKSPSDLSPESPVLSSPPKRKDASLEELQKR	0	0	0	0	0	0	0	0
O70251	174	O70251	O70251	Elongation factor 1-beta	Eef1b	sp|O70251|EF1B_MOUSE Elongation factor 1-beta OS=Mus musculus OX=10090 GN=Eef1b PE=1 SV=5	0.499983	0	0.0211188	41.644	33.604	41.644					0.499983	0	0.0211188	41.644		1	S	EECVRSIQADGLVWGSSKLVPVGYGIKKLQI	0	0	0	0	0	0	0	0
O70251	175	O70251	O70251	Elongation factor 1-beta	Eef1b	sp|O70251|EF1B_MOUSE Elongation factor 1-beta OS=Mus musculus OX=10090 GN=Eef1b PE=1 SV=5	0.499983	0	0.0211188	41.644	33.604	41.644					0.499983	0	0.0211188	41.644		1	S	ECVRSIQADGLVWGSSKLVPVGYGIKKLQIQ	0	0	0	0	0	0	0	0
O70251	82	O70251	O70251	Elongation factor 1-beta	Eef1b	sp|O70251|EF1B_MOUSE Elongation factor 1-beta OS=Mus musculus OX=10090 GN=Eef1b PE=1 SV=5	0.53725	0.711463	9.28e-05	77.562	51.623	77.562	0.530805	0.537394	9.28e-05	70.99	0.53725	0.711463	0.000106038	77.562		1	S	ASLPGVKKSLGKYGPSSVEDTTGSGAADAKD	596.09	1472.3	305.3	764.89	921.08	728.62	776.65	909.94
O70251	83	O70251	O70251	Elongation factor 1-beta	Eef1b	sp|O70251|EF1B_MOUSE Elongation factor 1-beta OS=Mus musculus OX=10090 GN=Eef1b PE=1 SV=5	0.966912	14.6788	8.24e-280	331.48	290.39	331.48	0.893038	11.3071	1.48e-21	146.86	0.966912	14.6788	8.24e-280	331.48		1	S	SLPGVKKSLGKYGPSSVEDTTGSGAADAKDD	4761.2	11821	595.12	5320.5	6542.1	8838.3	4784	9460.4
O70251	90	O70251	O70251	Elongation factor 1-beta	Eef1b	sp|O70251|EF1B_MOUSE Elongation factor 1-beta OS=Mus musculus OX=10090 GN=Eef1b PE=1 SV=5	0.878759	8.64374	1.05e-52	184.01	160.87	153.74	0.878759	8.64374	5.09e-22	153.74	0.850742	7.72728	1.05e-52	184.01		1	S	SLGKYGPSSVEDTTGSGAADAKDDDDIDLFG	1046.5	1971.7	205.88	1350.5	1999.4	1511	1448	2349.3
O70279	295	O70279	O70279	Protein DGCR14	Dgcr14	sp|O70279|ESS2_MOUSE Splicing factor ESS-2 homolog OS=Mus musculus OX=10090 GN=Ess2 PE=1 SV=2	1	44.3093	0.0346299	44.309	26.873	44.309					1	44.3093	0.0346299	44.309		1	S	QGKVGPDGKELIPQESPRVGGFGFVATPSPA	0	0	0	0	0	0	0	0
O70305	741	O70305	O70305	Ataxin-2	Atxn2	sp|O70305|ATX2_MOUSE Ataxin-2 OS=Mus musculus OX=10090 GN=Atxn2 PE=1 SV=1	0.942396	13.0149	9.31e-96	211.64	134.45	211.64	0.734738	6.73444	2.08e-07	134.75	0.942396	13.0149	9.31e-96	211.64		1	S	NSPAGSKENVKASETSPSFSKADNKGMSPVV	3772.4	6072.9	2168.9	3609.9	2781.5	2996.8	2200.7	3189.6
O70305	827	O70305	O70305	Ataxin-2	Atxn2	sp|O70305|ATX2_MOUSE Ataxin-2 OS=Mus musculus OX=10090 GN=Atxn2 PE=1 SV=1	0.892877	9.40657	2.06e-280	333.59	301.07	333.59					0.892877	9.40657	2.06e-280	333.59		1	S	SFIDSSSSSSNCTSGSSKTNSPSISPSMLSN	0	0	0	0	0	0	0	0
O70305	828	O70305	O70305	Ataxin-2	Atxn2	sp|O70305|ATX2_MOUSE Ataxin-2 OS=Mus musculus OX=10090 GN=Atxn2 PE=1 SV=1	0.825937	6.76846	2.5e-06	100.19	91.004	89.358	0.825937	6.76846	1.7e-05	89.358	0.786634	5.72361	2.5e-06	100.19		1	S	FIDSSSSSSNCTSGSSKTNSPSISPSMLSNA	1057.5	2259.6	207.4	2174.3	658.31	1004.1	591.51	1052.9
O70305	832	O70305	O70305	Ataxin-2	Atxn2	sp|O70305|ATX2_MOUSE Ataxin-2 OS=Mus musculus OX=10090 GN=Atxn2 PE=1 SV=1	0.809135	7.5077	0.000128008	77.959	64.332	77.959	0.471774	0	0.00762272	41.871	0.809135	7.5077	0.000128008	77.959		2	S	SSSSSNCTSGSSKTNSPSISPSMLSNAEHKR	0	0	0	0	0	0	0	0
O70305	834	O70305	O70305	Ataxin-2	Atxn2	sp|O70305|ATX2_MOUSE Ataxin-2 OS=Mus musculus OX=10090 GN=Atxn2 PE=1 SV=1	0.9082	10.8276	7.93e-05	86.625	68.487	86.625	0.471604	0	0.00762272	41.871	0.9082	10.8276	7.93e-05	86.625		2	S	SSSNCTSGSSKTNSPSISPSMLSNAEHKRGP	0	0	0	0	0	0	0	0
O70305	836	O70305	O70305	Ataxin-2	Atxn2	sp|O70305|ATX2_MOUSE Ataxin-2 OS=Mus musculus OX=10090 GN=Atxn2 PE=1 SV=1	0.959717	15.0973	7.93e-05	86.625	68.487	86.625	0.471604	0	0.00762272	41.871	0.959717	15.0973	7.93e-05	86.625		2	S	SNCTSGSSKTNSPSISPSMLSNAEHKRGPEV	0	0	0	0	0	0	0	0
O70305	838	O70305	O70305	Ataxin-2	Atxn2	sp|O70305|ATX2_MOUSE Ataxin-2 OS=Mus musculus OX=10090 GN=Atxn2 PE=1 SV=1	0.471604	0	0.00762272	41.871	30.431	41.871	0.471604	0	0.00762272	41.871							S	CTSGSSKTNSPSISPSMLSNAEHKRGPEVTS	0	0	0	0	0	0	0	0
O70305	636	O70305	O70305	Ataxin-2	Atxn2	sp|O70305|ATX2_MOUSE Ataxin-2 OS=Mus musculus OX=10090 GN=Atxn2 PE=1 SV=1	0.87802	8.57237	0.000159246	86.641	67.064	86.641					0.87802	8.57237	0.000159246	86.641		1	S	HNPPSEAAAPPVARTSPAGGTWSSVVSGVPR	0	0	0	0	0	0	0	0
O70310	44	O70310	O70310	Glycylpeptide N-tetradecanoyltransferase 1	Nmt1	sp|O70310|NMT1_MOUSE Glycylpeptide N-tetradecanoyltransferase 1 OS=Mus musculus OX=10090 GN=Nmt1 PE=1 SV=1	0.906342	9.85755	1.75e-25	174.51	134.59	174.51	0.906342	9.85755	1.75e-25	174.51						1	S	HCSDCENEEDNSHNRSGLSPANDTGAKKKKK	6085.8	13560	1773.5	7157.6	6956	6877.5	6280.9	8458.4
O70310	47	O70310	O70310	Glycylpeptide N-tetradecanoyltransferase 1	Nmt1	sp|O70310|NMT1_MOUSE Glycylpeptide N-tetradecanoyltransferase 1 OS=Mus musculus OX=10090 GN=Nmt1 PE=1 SV=1	0.999439	32.5383	3.23e-11	141.54	103.13	141.54	0.999439	32.5383	3.23e-11	141.54	0.982736	18.5832	3.63e-10	131.35		1	S	DCENEEDNSHNRSGLSPANDTGAKKKKKKQK	3331.5	4281.7	929.69	2142.5	3331.7	2162.4	2677.4	2457.6
O70311	38	O70311	O70311	Glycylpeptide N-tetradecanoyltransferase 2	Nmt2	sp|O70311|NMT2_MOUSE Glycylpeptide N-tetradecanoyltransferase 2 OS=Mus musculus OX=10090 GN=Nmt2 PE=1 SV=1	1	158.3	5.28e-16	158.3	116.85	158.3	1	158.3	5.28e-16	158.3	1	151.127	4.67e-11	151.13		1	S	GIDGDNEEETEHAKGSPGGDLGAKKKKKKQK	18378	31464	1901.9	18204	20328	16316	22706	20964
O70318	698	O70318	O70318	Band 4.1-like protein 2	Epb41l2	sp|O70318|E41L2_MOUSE Band 4.1-like protein 2 OS=Mus musculus OX=10090 GN=Epb41l2 PE=1 SV=2	0.999459	32.6673	0.0196162	40.278	31.273	40.278	0.999459	32.6673	0.0196162	40.278						1	S	KDESVITEEMNGKEMSPGHGPGETRKVEPVA	101.63	399.53	0	156.02	120.37	177.54	170.72	134.62
O70318	116	O70318	O70318	Band 4.1-like protein 2	Epb41l2	sp|O70318|E41L2_MOUSE Band 4.1-like protein 2 OS=Mus musculus OX=10090 GN=Epb41l2 PE=1 SV=2	0.981167	17.1738	1.06e-05	60.728	49.311	60.728	0.981167	17.1738	1.06e-05	60.728						1	S	PTQADVEDQILGKEESLPEEESRAKGDAEEM	682.05	1167.3	117.85	684.53	492.85	736.93	715.8	407.33
O70318	38	O70318	O70318	Band 4.1-like protein 2	Epb41l2	sp|O70318|E41L2_MOUSE Band 4.1-like protein 2 OS=Mus musculus OX=10090 GN=Epb41l2 PE=1 SV=2	0.996052	24.019	6.9e-15	135.45	101.75	84.493	0.889605	9.06249	0.000548425	71.344	0.996052	24.019	6.9e-15	135.45		1	S	SKEKAKEVENEQTPVSEPEEEKGSQPGPPVE	1211.7	1737.5	396.37	1460.4	1437	1518.4	1228.2	1046.3
O70318	193	O70318	O70318	Band 4.1-like protein 2	Epb41l2	sp|O70318|E41L2_MOUSE Band 4.1-like protein 2 OS=Mus musculus OX=10090 GN=Epb41l2 PE=1 SV=2	0.739036	4.52085	0.000139202	128.27	70.411	128.27					0.739036	4.52085	0.000139202	128.27		1	S	LEGGAAKRETKEVQTSELKAEVASQKATKKT	0	0	0	0	0	0	0	0
O70318	86	O70318	O70318	Band 4.1-like protein 2	Epb41l2	sp|O70318|E41L2_MOUSE Band 4.1-like protein 2 OS=Mus musculus OX=10090 GN=Epb41l2 PE=1 SV=2	1	124.423	5.23e-05	124.42	81.705	124.42	1	124.423	5.23e-05	124.42	1	45.661	0.0006079	105.46		1	S	RGISRFIPPWLKKQRSYNLVVAKDGGDKKEP	10630	20489	5501.5	16553	6696	23772	11127	21301
O70318	580	O70318	O70318	Band 4.1-like protein 2	Epb41l2	sp|O70318|E41L2_MOUSE Band 4.1-like protein 2 OS=Mus musculus OX=10090 GN=Epb41l2 PE=1 SV=2	0.958912	18.4947	2.42e-16	85.337	70.765	85.337	0.525804	5.14046	7.37e-08	59.478	0.958912	18.4947	2.42e-16	85.337		1	S	PGVISYTTIQDGRRDSKSPTKATPLPAEGKK	182.08	331.9	79.487	302.86	0	82.319	0	186.11
O70318	665	O70318	O70318	Band 4.1-like protein 2	Epb41l2	sp|O70318|E41L2_MOUSE Band 4.1-like protein 2 OS=Mus musculus OX=10090 GN=Epb41l2 PE=1 SV=2	0.493595	0	4.62e-06	79.568	68.268	79.568	0.49272	0	1.41e-05	70.453	0.493595	0	4.62e-06	79.568			S	WEKRRVTPLPFQPQASSHETLNVVEEKKRAE	0	0	0	0	0	0	0	0
O70318	666	O70318	O70318	Band 4.1-like protein 2	Epb41l2	sp|O70318|E41L2_MOUSE Band 4.1-like protein 2 OS=Mus musculus OX=10090 GN=Epb41l2 PE=1 SV=2	0.493595	0	4.62e-06	79.568	68.268	79.568	0.49272	0	1.41e-05	70.453	0.493595	0	4.62e-06	79.568			S	EKRRVTPLPFQPQASSHETLNVVEEKKRAEV	0	0	0	0	0	0	0	0
O70400	183	O70400	O70400	PDZ and LIM domain protein 1	Pdlim1	sp|O70400|PDLI1_MOUSE PDZ and LIM domain protein 1 OS=Mus musculus OX=10090 GN=Pdlim1 PE=1 SV=4	0.851986	7.96116	0.000166889	48.947	34.931	48.947	0.851986	7.96116	0.000166889	48.947						1	S	SGEEANSRPVVQPHPSGSLIIDKDSEVYKML	470.32	911.62	87.496	756.27	253.72	859.01	363.51	586.7
O70405	757	O70405	O70405	Serine/threonine-protein kinase ULK1	Ulk1	sp|O70405|ULK1_MOUSE Serine/threonine-protein kinase ULK1 OS=Mus musculus OX=10090 GN=Ulk1 PE=1 SV=1	0.993456	23.203	8.1e-15	105.05	95.336	105.05					0.993456	23.203	8.1e-15	105.05		1	S	GGGASSPAPVVFTVGSPPSGATPPQSTRTRM	0	0	0	0	0	0	0	0
O70405	450	O70405	O70405	Serine/threonine-protein kinase ULK1	Ulk1	sp|O70405|ULK1_MOUSE Serine/threonine-protein kinase ULK1 OS=Mus musculus OX=10090 GN=Ulk1 PE=1 SV=1	0.796739	5.93551	3.65e-22	146.78	102.32	146.78					0.796739	5.93551	3.65e-22	146.78		1	S	PTQVHNYQRIEQNLQSPTQQQTARSSAIRRS	0	0	0	0	0	0	0	0
O70405	622	O70405	O70405	Serine/threonine-protein kinase ULK1	Ulk1	sp|O70405|ULK1_MOUSE Serine/threonine-protein kinase ULK1 OS=Mus musculus OX=10090 GN=Ulk1 PE=1 SV=1	0.879767	8.70955	0.00701581	53.967	37.393	53.967					0.879767	8.70955	0.00701581	53.967		1	S	LPDFLQRSPLPPILGSPTKAGPSFDFPKTPS	0	0	0	0	0	0	0	0
O70433	238	O70433	O70433	Four and a half LIM domains protein 2	Fhl2	sp|O70433|FHL2_MOUSE Four and a half LIM domains protein 2 OS=Mus musculus OX=10090 GN=Fhl2 PE=1 SV=1	1	78.3345	0.00664937	78.334	51.08	78.334	1	78.3345	0.00664937	78.334						1	S	GCTNPISGLGGTKYISFEERQWHNDCFNCKK	1611.8	1401.9	1022.9	1135.3	738.63	1227.8	921.82	1152
O70439	125	O70439	O70439	Syntaxin-7	Stx7	sp|O70439|STX7_MOUSE Syntaxin-7 OS=Mus musculus OX=10090 GN=Stx7 PE=1 SV=3	0.333323	0	0.0014991	52.784	39.648	52.784					0.333323	0	0.0014991	52.784			S	QAAEREKEFVARVRASSRVSGGFPEDSSKEK	0	0	0	0	0	0	0	0
O70439	126	O70439	O70439	Syntaxin-7	Stx7	sp|O70439|STX7_MOUSE Syntaxin-7 OS=Mus musculus OX=10090 GN=Stx7 PE=1 SV=3	0.333323	0	0.0014991	52.784	39.648	52.784					0.333323	0	0.0014991	52.784			S	AAEREKEFVARVRASSRVSGGFPEDSSKEKN	0	0	0	0	0	0	0	0
O70439	129	O70439	O70439	Syntaxin-7	Stx7	sp|O70439|STX7_MOUSE Syntaxin-7 OS=Mus musculus OX=10090 GN=Stx7 PE=1 SV=3	0.999673	37.6858	0.000466155	88.021	61.915	61.435	0.999673	37.6858	0.0051086	61.435	0.994991	23.7561	0.000466155	88.021		1	S	REKEFVARVRASSRVSGGFPEDSSKEKNLVS	1279.1	2629.9	998.8	1004.4	2418.4	2000.5	1730.8	1710
O70439	75	O70439	O70439	Syntaxin-7	Stx7	sp|O70439|STX7_MOUSE Syntaxin-7 OS=Mus musculus OX=10090 GN=Stx7 PE=1 SV=3	0.763623	5.86077	9.12e-22	162.22	133.93	162.22					0.763623	5.86077	9.12e-22	162.22		1	S	NQLAKETDKYIKEFGSLPTTPSEQRQRKIQK	0	0	0	0	0	0	0	0
O70439	45	O70439	O70439	Syntaxin-7	Stx7	sp|O70439|STX7_MOUSE Syntaxin-7 OS=Mus musculus OX=10090 GN=Stx7 PE=1 SV=3	0.996952	25.1472	0.000359114	89.541	60.213	89.541	0.996952	25.1472	0.000359114	89.541						1	S	VEIQRTLNQLGTPQDSPELRQLLQQKQQYTN	363.67	644.84	245.73	579.45	433.39	636.03	532.72	506.16
O70456;P61982;P62259;P63101;P68254;P68510;Q9CQV8	45;46;46;45;45;46;47	O70456;P61982;P62259;P63101;P68254;P68510;Q9CQV8	P62259	14-3-3 protein sigma;14-3-3 protein gamma;14-3-3 protein gamma
O70480	90	O70480	O70480	Vesicle-associated membrane protein 4	Vamp4	sp|O70480|VAMP4_MOUSE Vesicle-associated membrane protein 4 OS=Mus musculus OX=10090 GN=Vamp4 PE=1 SV=1	0.921717	13.4607	0.0145572	42.789	31.527	42.789					0.921717	13.4607	0.0145572	42.789		1	S	IERGERLDELQDKSESLSDNATAFSNRSKQL	0	0	0	0	0	0	0	0
O70481	15	O70481	O70481	E3 ubiquitin-protein ligase UBR1	Ubr1	sp|O70481|UBR1_MOUSE E3 ubiquitin-protein ligase UBR1 OS=Mus musculus OX=10090 GN=Ubr1 PE=1 SV=2	1	49.4231	0.0092557	49.423	34.862	49.423					1	49.4231	0.0092557	49.423		1	S	_MADEEMDGAERMDVSPEPPLAPQRPASWWD	0	0	0	0	0	0	0	0
O70551	309	O70551	O70551	SRSF protein kinase 1	Srpk1	sp|O70551|SRPK1_MOUSE SRSF protein kinase 1 OS=Mus musculus OX=10090 GN=Srpk1 PE=1 SV=2	0.548514	0.924009	0.000635349	61.692	41.311	61.692					0.548514	0.924009	0.000635349	61.692		1	S	KESGPGQKRPNKQEESESPVDRPLTENPPNK	0	0	0	0	0	0	0	0
O70551	311	O70551	O70551	SRSF protein kinase 1	Srpk1	sp|O70551|SRPK1_MOUSE SRSF protein kinase 1 OS=Mus musculus OX=10090 GN=Srpk1 PE=1 SV=2	0.9984	27.961	7.51e-53	182.67	162.01	182.67	0.9984	27.961	7.51e-53	182.67						1	S	SGPGQKRPNKQEESESPVDRPLTENPPNKMT	15144	21091	2781.8	17965	15363	21031	14367	19302
O88196	1009	O88196	O88196	E3 ubiquitin-protein ligase TTC3	Ttc3	sp|O88196|TTC3_MOUSE E3 ubiquitin-protein ligase TTC3 OS=Mus musculus OX=10090 GN=Ttc3 PE=1 SV=2	1	43.5923	0.000632999	68.257	43.04	43.592	1	53.9948	0.00245892	53.995	1	43.5923	0.000632999	68.257		1	S	FDIMDSRCTVLRKQDSDEMPFGCIKVKNKGK	558.76	1092.8	354.7	607.22	718.98	751.84	460.21	599.81
O88196	1060	O88196	O88196	E3 ubiquitin-protein ligase TTC3	Ttc3	sp|O88196|TTC3_MOUSE E3 ubiquitin-protein ligase TTC3 OS=Mus musculus OX=10090 GN=Ttc3 PE=1 SV=2	0.983609	17.7821	1.09e-06	114.63	94.034	114.63	0.939664	11.924	0.000285791	70.414	0.983609	17.7821	1.09e-06	114.63		1	S	PSSEAVTPEDHSRRNSDSAGPFAVPDHLRQD	0	200.61	117.41	164.39	110.47	228.47	0	202.73
O88196	1900	O88196	O88196	E3 ubiquitin-protein ligase TTC3	Ttc3	sp|O88196|TTC3_MOUSE E3 ubiquitin-protein ligase TTC3 OS=Mus musculus OX=10090 GN=Ttc3 PE=1 SV=2	0.333135	0	1.52e-22	152.94	132.61	152.94					0.333135	0	1.52e-22	152.94			S	DKKTSEAHSAASVAKSSQSPPLAAAGPSART	0	0	0	0	0	0	0	0
O88196	1901	O88196	O88196	E3 ubiquitin-protein ligase TTC3	Ttc3	sp|O88196|TTC3_MOUSE E3 ubiquitin-protein ligase TTC3 OS=Mus musculus OX=10090 GN=Ttc3 PE=1 SV=2	0.333135	0	1.52e-22	152.94	132.61	152.94					0.333135	0	1.52e-22	152.94			S	KKTSEAHSAASVAKSSQSPPLAAAGPSARTK	0	0	0	0	0	0	0	0
O88196	1903	O88196	O88196	E3 ubiquitin-protein ligase TTC3	Ttc3	sp|O88196|TTC3_MOUSE E3 ubiquitin-protein ligase TTC3 OS=Mus musculus OX=10090 GN=Ttc3 PE=1 SV=2	0.983106	18.7833	1.52e-22	152.94	132.61	110.57	0.983106	18.7833	3.15e-06	110.57	0.333135	0	1.52e-22	152.94		1	S	TSEAHSAASVAKSSQSPPLAAAGPSARTKGQ	1044.8	991.94	707.12	633.51	794.16	785.5	637.9	878.74
O88273	55	O88273	O88273	Gremlin-2	Grem2	sp|O88273|GREM2_MOUSE Gremlin-2 OS=Mus musculus OX=10090 GN=Grem2 PE=1 SV=1	0.615174	2.03734	1.06e-74	219.52	185.13	219.52	0.496365	0	0.000531408	77.527	0.615174	2.03734	1.06e-74	219.52		1	S	NNSERWHHQIKEVLASSQEALVVTERKYLKS	0	0	0	0	0	0	0	0
O88273	56	O88273	O88273	Gremlin-2	Grem2	sp|O88273|GREM2_MOUSE Gremlin-2 OS=Mus musculus OX=10090 GN=Grem2 PE=1 SV=1	0.974928	15.8978	1.14e-61	209.66	173.93	209.66	0.496365	0	0.000531408	77.527	0.974928	15.8978	1.14e-61	209.66		1	S	NSERWHHQIKEVLASSQEALVVTERKYLKSD	0	0	0	0	0	0	0	0
O88324	180	O88324	O88324	CD83 antigen	Cd83	sp|O88324|CD83_MOUSE CD83 antigen OS=Mus musculus OX=10090 GN=Cd83 PE=2 SV=1	0.460911	0	0.00157208	75.669	59.095	75.669					0.460911	0	0.00157208	75.669			S	DISKPGTEQAFLPVTSPSKHLGPVTLPKTET	0	0	0	0	0	0	0	0
O88343	65	O88343	O88343	Electrogenic sodium bicarbonate cotransporter 1	Slc4a4	sp|O88343|S4A4_MOUSE Electrogenic sodium bicarbonate cotransporter 1 OS=Mus musculus OX=10090 GN=Slc4a4 PE=1 SV=2	0.999943	42.4235	4.29e-06	101.38	66.493	99.973	0.992384	21.1496	4.29e-06	101.38	0.999943	42.4235	0.000460292	99.973		1	S	GHKEKKEKERISENYSDKSDVENADESSSSI	3225.5	8518.4	441.92	3610.2	5752	5317.5	4344.1	5818.7
O88343	68	O88343	O88343	Electrogenic sodium bicarbonate cotransporter 1	Slc4a4	sp|O88343|S4A4_MOUSE Electrogenic sodium bicarbonate cotransporter 1 OS=Mus musculus OX=10090 GN=Slc4a4 PE=1 SV=2	1	85.8926	2.03e-208	272.31	237.93	272.31	0.999989	51.0031	4.46e-16	125.74	1	85.8926	2.03e-208	272.31		1	S	EKKEKERISENYSDKSDVENADESSSSILKP	2476.5	4931.1	588.09	3872.1	2627.7	4346	2582.3	2762.4
O88343	239	O88343	O88343	Electrogenic sodium bicarbonate cotransporter 1	Slc4a4	sp|O88343|S4A4_MOUSE Electrogenic sodium bicarbonate cotransporter 1 OS=Mus musculus OX=10090 GN=Slc4a4 PE=1 SV=2	0.707086	3.94768	0.0186094	44.425	28.201	44.425	0.707086	3.94768	0.0186094	44.425						1	S	LADIGKTVSSASRMFSNPDNGSPAMTHRNLT	413.65	930.43	901.83	1054.6	363.03	1144.5	311.73	428.85
O88343	245	O88343	O88343	Electrogenic sodium bicarbonate cotransporter 1	Slc4a4	sp|O88343|S4A4_MOUSE Electrogenic sodium bicarbonate cotransporter 1 OS=Mus musculus OX=10090 GN=Slc4a4 PE=1 SV=2	0.999976	46.5386	3.32e-125	252.82	228.97	148.46	0.999976	46.5386	3.32e-125	252.82	0.999845	38.2674	0.000111169	95.767		1	S	TVSSASRMFSNPDNGSPAMTHRNLTSSSLND	6984.1	21241	9145.9	18038	6578.6	16048	6846.4	7798.7
O88343	255	O88343	O88343	Electrogenic sodium bicarbonate cotransporter 1	Slc4a4	sp|O88343|S4A4_MOUSE Electrogenic sodium bicarbonate cotransporter 1 OS=Mus musculus OX=10090 GN=Slc4a4 PE=1 SV=2	0.292832	0.964934	0.00116679	52.784	28.485	52.784	0.248659	0	0.00350193	46.702	0.292832	0.964934	0.00116679	52.784			S	NPDNGSPAMTHRNLTSSSLNDISDKPEKDQL	0	0	0	0	0	0	0	0
O88343	256	O88343	O88343	Electrogenic sodium bicarbonate cotransporter 1	Slc4a4	sp|O88343|S4A4_MOUSE Electrogenic sodium bicarbonate cotransporter 1 OS=Mus musculus OX=10090 GN=Slc4a4 PE=1 SV=2	0.497707	0	6.69e-129	255.98	223.43	255.98	0.497707	0	6.69e-129	255.98							S	PDNGSPAMTHRNLTSSSLNDISDKPEKDQLK	0	0	0	0	0	0	0	0
O88343	257	O88343	O88343	Electrogenic sodium bicarbonate cotransporter 1	Slc4a4	sp|O88343|S4A4_MOUSE Electrogenic sodium bicarbonate cotransporter 1 OS=Mus musculus OX=10090 GN=Slc4a4 PE=1 SV=2	0.988247	19.2824	0	362.02	327.54	143.38	0.97886	17.1162	6.69e-129	255.98	0.988247	19.2824	0	362.02		1	S	DNGSPAMTHRNLTSSSLNDISDKPEKDQLKN	2849.7	7020.1	688.01	6686.6	2484.5	6105.5	2767.5	2857.8
O88343;E9Q3M5	223;226	O88343	O88343	Electrogenic sodium bicarbonate cotransporter 1;Anion exchange protein	Slc4a4;Slc4a5	sp|O88343|S4A4_MOUSE Electrogenic sodium bicarbonate cotransporter 1 OS=Mus musculus OX=10090 GN=Slc4a4 PE=1 SV=2;sp|E9Q3M5|S4A5_MOUSE Electrogenic sodium bicarbonate cotransporter 4 OS=Mus musculus OX=10090 GN=Slc4a5 PE=1 SV=1	1	60.0191	0.0194272	60.019	16.936	60.019					1	60.0191	0.0194272	60.019		1	S	LLRKHRHQTKKSNLRSLADIGKTVSSASRMF	0	0	0	0	0	0	0	0
O88384	138	O88384	O88384	Vesicle transport through interaction with t-SNAREs homolog 1B	Vti1b	sp|O88384|VTI1B_MOUSE Vesicle transport through interaction with t-SNAREs homolog 1B OS=Mus musculus OX=10090 GN=Vti1b PE=1 SV=1	0.982423	17.4735	3.03e-05	97.214	69.593	97.214	0.982423	17.4735	3.03e-05	97.214	0.895114	9.3116	0.000384469	85.845		1	S	NRLQSQRALLLQGTESLNRATQSIERSHRIA	406.76	629.31	322.09	437.54	201.11	490.25	196.6	368.63
O88413	372	O88413	O88413	Tubby-related protein 3	Tulp3	sp|O88413|TULP3_MOUSE Tubby-related protein 3 OS=Mus musculus OX=10090 GN=Tulp3 PE=1 SV=1	1	52.5804	0.00203628	68.751	49.48	52.58					1	52.5804	0.00203628	68.751		1	S	PRNEHESLLSKWQNKSMENLIELHNKAPVWN	0	0	0	0	0	0	0	0
O88444	549	O88444	O88444	Adenylate cyclase type 1	Adcy1	sp|O88444|ADCY1_MOUSE Adenylate cyclase type 1 OS=Mus musculus OX=10090 GN=Adcy1 PE=1 SV=2	0.605782	1.88092	7.95e-75	221.85	201.19	221.85					0.605782	1.88092	7.95e-75	221.85		1	S	KRRALRTASEKLRNRSSFSTNVVYTTPGTRV	0	0	0	0	0	0	0	0
O88444	550	O88444	O88444	Adenylate cyclase type 1	Adcy1	sp|O88444|ADCY1_MOUSE Adenylate cyclase type 1 OS=Mus musculus OX=10090 GN=Adcy1 PE=1 SV=2	0.652559	2.74938	2.03e-192	290.63	264.18	290.63	0.652559	2.74938	2.03e-192	290.63						1	S	RRALRTASEKLRNRSSFSTNVVYTTPGTRVN	1813.1	8266	2904.7	3891.8	6346.9	6284.4	3193.6	6021.8
O88447	162	O88447	O88447	Kinesin light chain 1	Klc1	sp|O88447|KLC1_MOUSE Kinesin light chain 1 OS=Mus musculus OX=10090 GN=Klc1 PE=1 SV=3	0.997802	26.5693	2.41e-08	117.92	85.418	96.163	0.983061	17.6369	5.32e-05	94.487	0.997802	26.5693	2.41e-08	117.92		1	S	HLEFMNQLKKYDDDISPSEDKDSDSSKEPLD	3028.6	5616.1	916.94	4541.9	3482.4	5045.8	3157.9	4678
O88447	520	O88447	O88447	Kinesin light chain 1	Klc1	sp|O88447|KLC1_MOUSE Kinesin light chain 1 OS=Mus musculus OX=10090 GN=Klc1 PE=1 SV=3	0.909078	9.99931	0.000983617	74.475	59.785	52.555	0.909078	9.99931	0.000983617	74.475	0.650677	2.70138	0.00193632	65.805		1	S	VAEVLNDPESMEKRRSRESLNMDVVKYESGP	9442	12860	10297	8865.2	10770	8675.3	7661	9522.5
O88447	523	O88447	O88447	Kinesin light chain 1	Klc1	sp|O88447|KLC1_MOUSE Kinesin light chain 1 OS=Mus musculus OX=10090 GN=Klc1 PE=1 SV=3	0.5	0	0.000983617	74.475	59.785	74.475	0.5	0	0.000983617	74.475	0.5	0	0.00193632	65.805		1	S	VLNDPESMEKRRSRESLNMDVVKYESGPDGG	7121.9	9546	7598.8	6155.9	7957.8	6392.8	5546.4	7097.8
O88447	459	O88447	O88447	Kinesin light chain 1	Klc1	sp|O88447|KLC1_MOUSE Kinesin light chain 1 OS=Mus musculus OX=10090 GN=Klc1 PE=1 SV=3	0.999934	41.8109	2.61e-85	232.17	195.64	232.17	0.96646	14.7466	5.72e-10	134.49	0.999934	41.8109	2.61e-85	232.17		1	S	AFGEYGGWYKACKVDSPTVTTTLKNLGALYR	9121.6	10789	4402.3	9612.6	5589.4	9509.8	5868.8	8710.5
O88448	574	O88448	O88448	Kinesin light chain 2	Klc2	sp|O88448|KLC2_MOUSE Kinesin light chain 2 OS=Mus musculus OX=10090 GN=Klc2 PE=1 SV=1	0.683981	3.35331	2.82e-06	112.5	55.15	112.5	0.5	0	0.0113246	46.592	0.683981	3.35331	2.82e-06	112.5		1	S	QGGGPQEPNSRMKRASSLNFLNKSVEEPVQP	875.27	1218.7	488.3	1364.5	410.15	1711	678.52	892.73
O88448	575	O88448	O88448	Kinesin light chain 2	Klc2	sp|O88448|KLC2_MOUSE Kinesin light chain 2 OS=Mus musculus OX=10090 GN=Klc2 PE=1 SV=1	0.997479	25.9739	8.42e-43	198.25	144.28	198.25	0.982101	17.3932	3.32e-32	187.42	0.997479	25.9739	8.42e-43	198.25		1	S	GGGPQEPNSRMKRASSLNFLNKSVEEPVQPG	19013	43446	23783	34633	22424	41893	21934	32142
O88448	174	O88448	O88448	Kinesin light chain 2	Klc2	sp|O88448|KLC2_MOUSE Kinesin light chain 2 OS=Mus musculus OX=10090 GN=Klc2 PE=1 SV=1	0.830845	6.92191	2.65e-14	75.248	59.85	75.248	0.830845	6.92191	2.65e-14	75.248	0.817497	6.57458	2.92e-08	61.941		1	S	PKDSLDDLFPNEDEQSPAPSPGGGDVAAQHG	141.31	357.63	0	83.079	132.85	158.47	75.903	167.67
O88448	505	O88448	O88448	Kinesin light chain 2	Klc2	sp|O88448|KLC2_MOUSE Kinesin light chain 2 OS=Mus musculus OX=10090 GN=Klc2 PE=1 SV=1	0.913154	11.1995	1.08e-22	101.24	89.834	101.24	0.892434	10.9972	5.14e-06	51.774	0.913154	11.1995	1.08e-22	101.24		1	S	VELLKDGSGRGHRRGSRDVAGPQSESDLEES	218.39	476.5	342.5	161.74	192.79	360.96	255.94	334.11
O88448	443	O88448	O88448	Kinesin light chain 2	Klc2	sp|O88448|KLC2_MOUSE Kinesin light chain 2 OS=Mus musculus OX=10090 GN=Klc2 PE=1 SV=1	0.774817	5.36831	4.21e-10	137.4	105.97	137.4	0.472881	0	0.00133156	79.492	0.774817	5.36831	4.21e-10	137.4		1	S	RPMEYGSWYKACKVDSPTVNTTLRTLGALYR	0	0	0	0	0	0	0	0
O88466	1381	O88466	O88466	Zinc finger protein 106	Znf106	sp|O88466|ZN106_MOUSE Zinc finger protein 106 OS=Mus musculus OX=10090 GN=Znf106 PE=1 SV=3	0.496199	0	0.00337393	41.412	31.882	41.412					0.496199	0	0.00337393	41.412			S	LRKKKTLRATHVPENSDTEQDVFTAKPARKV	0	0	0	0	0	0	0	0
O88485	618	O88485	O88485	Cytoplasmic dynein 1 intermediate chain 1	Dync1i1	sp|O88485|DC1I1_MOUSE Cytoplasmic dynein 1 intermediate chain 1 OS=Mus musculus OX=10090 GN=Dync1i1 PE=1 SV=2	1	52.5225	2.86e-30	162.86	142.74	52.522	1	52.5225	2.86e-30	162.86	1	72.634	3.97e-09	122.96		1	S	RFARTLVEIRANRADSEEEGAVELAA_____	7664.4	7370.8	6719.8	6930.3	5183.9	5856.9	6131.3	5810
O88485	162	O88485	O88485	Cytoplasmic dynein 1 intermediate chain 1	Dync1i1	sp|O88485|DC1I1_MOUSE Cytoplasmic dynein 1 intermediate chain 1 OS=Mus musculus OX=10090 GN=Dync1i1 PE=1 SV=2	0.995728	23.6799	8.86e-68	193.18	178.87	167.03	0.995728	23.6799	8.86e-68	193.18						1	S	VSYSKETQTPLATHQSEEDEEDEEMVEPKIG	7781.2	9474.1	6644	8282.2	6337	7175.5	7209.1	6747.6
O88485	180	O88485	O88485	Cytoplasmic dynein 1 intermediate chain 1	Dync1i1	sp|O88485|DC1I1_MOUSE Cytoplasmic dynein 1 intermediate chain 1 OS=Mus musculus OX=10090 GN=Dync1i1 PE=1 SV=2	1	57.0343	4.78e-21	150.22	123.12	57.034	1	57.0343	0.00188096	69.451	1	113.757	4.78e-21	150.22		1	S	DEEDEEMVEPKIGHDSELENQEKKQETKEAP	1582.6	1945.9	1005.6	944.92	1502.6	1778.7	1702.8	1726
O88485	94	O88485	O88485	Cytoplasmic dynein 1 intermediate chain 1	Dync1i1	sp|O88485|DC1I1_MOUSE Cytoplasmic dynein 1 intermediate chain 1 OS=Mus musculus OX=10090 GN=Dync1i1 PE=1 SV=2	0.989254	20.8508	7.09e-10	117.3	107.2	117.3	0.694215	6.44603	0.000577409	51.726	0.989254	20.8508	7.09e-10	117.3		1	S	MSPSSKSVSTPSDAGSQDSGDLGPLTRTLQW	495.12	553.17	508.75	281.87	362.45	248.98	164.66	206.61
O88487	95	O88487	O88487	Cytoplasmic dynein 1 intermediate chain 2	Dync1i2	sp|O88487|DC1I2_MOUSE Cytoplasmic dynein 1 intermediate chain 2 OS=Mus musculus OX=10090 GN=Dync1i2 PE=1 SV=1	0.864557	8.05698	5.57e-108	235.11	207.78	235.11	0.864557	8.05698	5.57e-108	235.11						1	S	MSPSSKSVSTPSEAGSQDSGDGAVGSRRGPI	2325.9	1859.6	1110.9	1467.4	1593.9	1677.4	998.99	996.68
O88491	2369	O88491	O88491	Histone-lysine N-methyltransferase
O88502	452	O88502	O88502	High affinity cAMP-specific and IBMX-insensitive 3'
O88508	102	O88508	O88508	DNA (cytosine-5)-methyltransferase 3A	Dnmt3a	sp|O88508|DNM3A_MOUSE DNA (cytosine-5)-methyltransferase 3A OS=Mus musculus OX=10090 GN=Dnmt3a PE=1 SV=2	0.999606	34.0392	0.00382706	49.929	24.211	49.929	0.999606	34.0392	0.00382706	49.929						1	S	NGDLEKRSEPQPEEGSPAAGQKGGAPAEGEG	323.07	313.7	201.94	176.42	466.95	319.24	231.62	212.61
O88532	1054	O88532	O88532	Zinc finger RNA-binding protein	Zfr	sp|O88532|ZFR_MOUSE Zinc finger RNA-binding protein OS=Mus musculus OX=10090 GN=Zfr PE=1 SV=2	1	74.5186	2.07e-89	238.12	190.08	74.519	1	74.5186	2.25e-27	161.59	1	52.2982	2.07e-89	238.12		1	S	NQRFNIHNNRKRRRDSDGVDGFEAEGKKDKK	8660.7	9675.7	4313.4	8601.4	6904.5	9080.7	7237.3	10519
O88543	410	O88543	O88543	COP9 signalosome complex subunit 3	Cops3	sp|O88543|CSN3_MOUSE COP9 signalosome complex subunit 3 OS=Mus musculus OX=10090 GN=Cops3 PE=1 SV=3	0.99945	32.6887	0.000195528	91.401	75.147	91.401	0.99945	32.6887	0.000195528	91.401	0.938615	12.9783	0.0137125	46.926		1	S	QEITVNPQFVQKSMGSQEDDSGNKPSSYS__	9242.1	11695	8792.3	9186.1	6412.5	10613	6814.3	9357.5
O88559	544	O88559	O88559	Menin	Men1	sp|O88559|MEN1_MOUSE Menin OS=Mus musculus OX=10090 GN=Men1 PE=1 SV=2	0.999875	39.3997	1.23e-10	73.975	66.781	73.975	0.999395	33.0108	1.67e-06	60.348	0.999875	39.3997	1.23e-10	73.975		1	S	GQEVGNAAQAPAPAASPPPEGPVLTFQSEKM	226.48	274.5	144	141.97	81.509	202.38	0	177.14
O88569	259	O88569	O88569	Heterogeneous nuclear ribonucleoproteins A2/B1	Hnrnpa2b1	sp|O88569|ROA2_MOUSE Heterogeneous nuclear ribonucleoproteins A2/B1 OS=Mus musculus OX=10090 GN=Hnrnpa2b1 PE=1 SV=2	1	124.989	6.02e-22	124.99	110.06	124.99	1	124.989	6.02e-22	124.99	1	91.7475	2.18e-11	91.748		1	S	YNGYGGGPGGGNFGGSPGYGGGRGGYGGGGP	669.17	821.69	586.62	899.23	638.82	869.36	584.75	612.79
O88569	341	O88569	O88569	Heterogeneous nuclear ribonucleoproteins A2/B1	Hnrnpa2b1	sp|O88569|ROA2_MOUSE Heterogeneous nuclear ribonucleoproteins A2/B1 OS=Mus musculus OX=10090 GN=Hnrnpa2b1 PE=1 SV=2	0.946679	12.493	1.58e-09	95.713	90.501	95.713	0.88625	8.91604	6.96e-09	91.725	0.946679	12.493	1.58e-09	95.713		1	S	NMGGPYGGGNYGPGGSGGSGGYGGRSRY___	2657.8	3198.4	2325	2465.1	1985.1	2532.1	2212.8	2072
O88569	344	O88569	O88569	Heterogeneous nuclear ribonucleoproteins A2/B1	Hnrnpa2b1	sp|O88569|ROA2_MOUSE Heterogeneous nuclear ribonucleoproteins A2/B1 OS=Mus musculus OX=10090 GN=Hnrnpa2b1 PE=1 SV=2	0.860815	7.91316	5.32e-14	110.57	101.98	110.57	0.745406	4.66544	1.34e-06	62.295	0.860815	7.91316	5.32e-14	110.57		1	S	GPYGGGNYGPGGSGGSGGYGGRSRY______	319.21	325.34	299.1	382.59	219.04	253.95	196.74	267.8
O88587	260	O88587	O88587	Catechol O-methyltransferase	Comt	sp|O88587|COMT_MOUSE Catechol O-methyltransferase OS=Mus musculus OX=10090 GN=Comt PE=1 SV=2	0.768102	5.20122	6.04e-34	185.2	153.15	165.72	0.768102	5.20122	4.5e-19	165.72	0.5	0	6.04e-34	185.2		1	S	KVVDGLEKAVYQGPGSSPVKS__________	31524	35173	2985.3	28680	24945	32910	24035	26951
O88587	261	O88587	O88587	Catechol O-methyltransferase	Comt	sp|O88587|COMT_MOUSE Catechol O-methyltransferase OS=Mus musculus OX=10090 GN=Comt PE=1 SV=2	0.979308	16.7513	6.04e-34	185.2	153.15	89.403	0.5	0	9.51e-11	133.88	0.979308	16.7513	6.04e-34	185.2		1	S	VVDGLEKAVYQGPGSSPVKS___________	21195	25185	2683.8	20765	17064	22542	16390	19410
O88602	221	O88602	O88602	Voltage-dependent calcium channel gamma-2 subunit	Cacng2	sp|O88602|CCG2_MOUSE Voltage-dependent calcium channel gamma-2 subunit OS=Mus musculus OX=10090 GN=Cacng2 PE=1 SV=1	0.499928	0	0.0296782	40.577	27.54	40.577	0.499928	0	0.0296782	40.577						1	S	KQLRATARATDYLQASAITRIPSYRYRYQRR	581.24	1164.3	648.78	931.01	397.35	915.07	551.74	720.16
O88602	253	O88602	O88602	Voltage-dependent calcium channel gamma-2 subunit	Cacng2	sp|O88602|CCG2_MOUSE Voltage-dependent calcium channel gamma-2 subunit OS=Mus musculus OX=10090 GN=Cacng2 PE=1 SV=1	1	103.546	0.000556414	103.55	66.959	103.55	1	103.546	0.000556414	103.55	1	47.8234	0.0347265	47.823		1	S	RSSSRSTEPSHSRDASPVGVKGFNTLPSTEI	1488.5	5164.4	1537.6	1892.9	4610.1	3183.8	3597.9	2555.7
O88643	220	O88643	O88643	Serine/threonine-protein kinase PAK 1	Pak1	sp|O88643|PAK1_MOUSE Serine/threonine-protein kinase PAK 1 OS=Mus musculus OX=10090 GN=Pak1 PE=1 SV=1	0.839945	8.17219	1.6e-07	90.654	77.617	90.654					0.839945	8.17219	1.6e-07	90.654		1	S	VIEPLPVTPTRDVATSPISPTENNTTPPDAL	0	0	0	0	0	0	0	0
O88643	223	O88643	O88643	Serine/threonine-protein kinase PAK 1	Pak1	sp|O88643|PAK1_MOUSE Serine/threonine-protein kinase PAK 1 OS=Mus musculus OX=10090 GN=Pak1 PE=1 SV=1	0.999502	33.087	0	405.22	374.8	391.34	0.999502	33.087	0	391.34	0.998262	27.8502	0	405.22		1;2	S	PLPVTPTRDVATSPISPTENNTTPPDALTRN	15607	18396	13501	14903	11558	11531	10876	10206
O88643	155	O88643	O88643	Serine/threonine-protein kinase PAK 1	Pak1	sp|O88643|PAK1_MOUSE Serine/threonine-protein kinase PAK 1 OS=Mus musculus OX=10090 GN=Pak1 PE=1 SV=1	0.530999	1.3404	2.97e-50	202.4	161.67	202.4	0.530999	1.3404	2.97e-50	202.4						1	S	KKYMSFTDKSAEDYNSSNTLNVKTVSETPAV	2685.8	5084.8	1654.8	3913.5	2359.1	3869.8	2425.1	3393.1
O88643	156	O88643	O88643	Serine/threonine-protein kinase PAK 1	Pak1	sp|O88643|PAK1_MOUSE Serine/threonine-protein kinase PAK 1 OS=Mus musculus OX=10090 GN=Pak1 PE=1 SV=1	0.656035	4.55001	1.48e-17	145.29	113.65	145.29					0.656035	4.55001	1.48e-17	145.29		1	S	KYMSFTDKSAEDYNSSNTLNVKTVSETPAVP	0	0	0	0	0	0	0	0
O88643	204	O88643	O88643	Serine/threonine-protein kinase PAK 1	Pak1	sp|O88643|PAK1_MOUSE Serine/threonine-protein kinase PAK 1 OS=Mus musculus OX=10090 GN=Pak1 PE=1 SV=1	0.99885	32.3978	0.0223301	43.991	11.385	43.991	0.985378	21.2964	0.0236403	43.382	0.99885	32.3978	0.0223301	43.991		1	S	VIAPRPEHTKSVYTRSVIEPLPVTPTRDVAT	548.91	236.34	120.77	228.4	207.15	229.11	264.03	493.28
O88643	144	O88643	O88643	Serine/threonine-protein kinase PAK 1	Pak1	sp|O88643|PAK1_MOUSE Serine/threonine-protein kinase PAK 1 OS=Mus musculus OX=10090 GN=Pak1 PE=1 SV=1	0.990572	20.2148	0.00438775	87.308	38.511	48.423	0.990572	20.2148	0.00438775	87.308	0.860848	7.91436	0.00738324	75.378		1	S	EFYNSKKTSNSKKYMSFTDKSAEDYNSSNTL	12212	20018	4178.4	16344	7396	15946	9507.6	10844
O88703	789	O88703	O88703	Potassium/sodium hyperpolarization-activated cyclic nucleotide-gated channel 2	Hcn2	sp|O88703|HCN2_MOUSE Potassium/sodium hyperpolarization-activated cyclic nucleotide-gated channel 2 OS=Mus musculus OX=10090 GN=Hcn2 PE=1 SV=1	0.308268	0	1.36e-08	73.107	62.988	73.107	0.308268	0	1.36e-08	73.107							S	TRVGPALPARRLSRASRPLSASQPSLPHGVP	0	0	0	0	0	0	0	0
O88703	793	O88703	O88703	Potassium/sodium hyperpolarization-activated cyclic nucleotide-gated channel 2	Hcn2	sp|O88703|HCN2_MOUSE Potassium/sodium hyperpolarization-activated cyclic nucleotide-gated channel 2 OS=Mus musculus OX=10090 GN=Hcn2 PE=1 SV=1	0.459369	0	4.57e-09	73.107	62.988	65.641	0.459369	0	4.57e-09	73.107							S	PALPARRLSRASRPLSASQPSLPHGVPAPSP	0	0	0	0	0	0	0	0
O88703	795	O88703	O88703	Potassium/sodium hyperpolarization-activated cyclic nucleotide-gated channel 2	Hcn2	sp|O88703|HCN2_MOUSE Potassium/sodium hyperpolarization-activated cyclic nucleotide-gated channel 2 OS=Mus musculus OX=10090 GN=Hcn2 PE=1 SV=1	0.863573	11.3634	3.83e-14	104.24	92.041	99.907	0.509979	0.533701	4.06e-14	80.807	0.863573	11.3634	3.83e-14	104.24		1;2	S	LPARRLSRASRPLSASQPSLPHGVPAPSPAA	0	0	0	0	0	0	0	0
O88703	798	O88703	O88703	Potassium/sodium hyperpolarization-activated cyclic nucleotide-gated channel 2	Hcn2	sp|O88703|HCN2_MOUSE Potassium/sodium hyperpolarization-activated cyclic nucleotide-gated channel 2 OS=Mus musculus OX=10090 GN=Hcn2 PE=1 SV=1	0.536758	3.8111	3.51e-05	50.583	41.053	50.583					0.536758	3.8111	3.51e-05	50.583		1	S	RRLSRASRPLSASQPSLPHGVPAPSPAASAR	0	0	0	0	0	0	0	0
O88703	811	O88703	O88703	Potassium/sodium hyperpolarization-activated cyclic nucleotide-gated channel 2	Hcn2	sp|O88703|HCN2_MOUSE Potassium/sodium hyperpolarization-activated cyclic nucleotide-gated channel 2 OS=Mus musculus OX=10090 GN=Hcn2 PE=1 SV=1	0.340224	2.85779	2.26e-05	48.797	35.838	48.797	0.340224	2.85779	2.26e-05	48.797							S	QPSLPHGVPAPSPAASARPASSSTPRLGPAP	0	0	0	0	0	0	0	0
O88703	816	O88703	O88703	Potassium/sodium hyperpolarization-activated cyclic nucleotide-gated channel 2	Hcn2	sp|O88703|HCN2_MOUSE Potassium/sodium hyperpolarization-activated cyclic nucleotide-gated channel 2 OS=Mus musculus OX=10090 GN=Hcn2 PE=1 SV=1	0.314133	0.704247	4.06e-14	80.807	72.261	65.641	0.314133	0.704247	4.06e-14	80.807							S	HGVPAPSPAASARPASSSTPRLGPAPTARTA	0	0	0	0	0	0	0	0
O88703	840	O88703	O88703	Potassium/sodium hyperpolarization-activated cyclic nucleotide-gated channel 2	Hcn2	sp|O88703|HCN2_MOUSE Potassium/sodium hyperpolarization-activated cyclic nucleotide-gated channel 2 OS=Mus musculus OX=10090 GN=Hcn2 PE=1 SV=1	0.964575	14.3504	1.34e-30	149.49	128.25	86.006	0.964575	14.3504	1.62e-09	86.006	0.866256	8.41602	1.34e-30	149.49		1;2	S	APTARTAAPSPDRRDSASPGAASGLDPLDSA	638.93	1614.2	708	1197.8	368.12	1078.4	836.91	984.51
O88703	842	O88703	O88703	Potassium/sodium hyperpolarization-activated cyclic nucleotide-gated channel 2	Hcn2	sp|O88703|HCN2_MOUSE Potassium/sodium hyperpolarization-activated cyclic nucleotide-gated channel 2 OS=Mus musculus OX=10090 GN=Hcn2 PE=1 SV=1	0.999578	33.7443	0	365.35	335.88	360.12	0.994332	22.4409	0	365.35	0.999578	33.7443	0	360.12		1;2	S	TARTAAPSPDRRDSASPGAASGLDPLDSARS	5609.2	14407	7642.4	6531.1	6948.5	9326	6462.8	8451.3
O88703	119	O88703	O88703	Potassium/sodium hyperpolarization-activated cyclic nucleotide-gated channel 2	Hcn2	sp|O88703|HCN2_MOUSE Potassium/sodium hyperpolarization-activated cyclic nucleotide-gated channel 2 OS=Mus musculus OX=10090 GN=Hcn2 PE=1 SV=1	1	115.566	0	336.49	312.93	285.95	1	103.743	0	336.49	1	115.566	2.04e-189	285.95		1	S	CRGAASGPSAAEEAGSEEAGPAGEPRGSQAS	9531.1	18138	13502	13299	10397	13286	9372.2	13480
O88703	90	O88703	O88703	Potassium/sodium hyperpolarization-activated cyclic nucleotide-gated channel 2	Hcn2	sp|O88703|HCN2_MOUSE Potassium/sodium hyperpolarization-activated cyclic nucleotide-gated channel 2 OS=Mus musculus OX=10090 GN=Hcn2 PE=1 SV=1	1	42.0307	0.0265494	42.031	26.275	42.031	1	42.0307	0.0265494	42.031						1	S	KGGANGECGRGEPQCSPEGPARGPKVSFSCR	174.52	812.53	169.97	402.21	455.54	292.3	294.38	581.82
O88703	131	O88703	O88703	Potassium/sodium hyperpolarization-activated cyclic nucleotide-gated channel 2	Hcn2	sp|O88703|HCN2_MOUSE Potassium/sodium hyperpolarization-activated cyclic nucleotide-gated channel 2 OS=Mus musculus OX=10090 GN=Hcn2 PE=1 SV=1	0.994033	22.2161	0.0198722	67.08	33.959	67.08	0.994033	22.2161	0.0198722	67.08	0.777457	5.43264	0.0337192	44.612		1	S	EAGSEEAGPAGEPRGSQASFLQRQFGALLQP	0	0	0	0	0	0	0	0
O88703	134	O88703	O88703	Potassium/sodium hyperpolarization-activated cyclic nucleotide-gated channel 2	Hcn2	sp|O88703|HCN2_MOUSE Potassium/sodium hyperpolarization-activated cyclic nucleotide-gated channel 2 OS=Mus musculus OX=10090 GN=Hcn2 PE=1 SV=1	0.999894	39.7466	0.00073602	88.187	59.982	88.187	0.99969	35.092	0.00180256	75.819	0.999894	39.7466	0.00073602	88.187		1	S	SEEAGPAGEPRGSQASFLQRQFGALLQPGVN	5114.4	15234	8140.4	11391	4962.4	14384	4317.4	9973.1
O88703	726	O88703	O88703	Potassium/sodium hyperpolarization-activated cyclic nucleotide-gated channel 2	Hcn2	sp|O88703|HCN2_MOUSE Potassium/sodium hyperpolarization-activated cyclic nucleotide-gated channel 2 OS=Mus musculus OX=10090 GN=Hcn2 PE=1 SV=1	1	53.1701	0.00740251	53.17	37.904	53.17					1	53.1701	0.00740251	53.17		1	S	CPQVARPLVGPLALGSPRLVRRAPPGPLPPA	0	0	0	0	0	0	0	0
O88703	750	O88703	O88703	Potassium/sodium hyperpolarization-activated cyclic nucleotide-gated channel 2	Hcn2	sp|O88703|HCN2_MOUSE Potassium/sodium hyperpolarization-activated cyclic nucleotide-gated channel 2 OS=Mus musculus OX=10090 GN=Hcn2 PE=1 SV=1	0.999678	38.7532	2.85e-19	109.79	101.19	99.515	0.999678	38.7532	1.32e-14	101.39	0.604868	1.85682	2.85e-19	109.79		1;2	S	PGPLPPAASPGPPAASPPAAPSSPRAPRTSP	1057.6	1899.3	1223.7	1787.2	948.54	1743.6	575.42	1266.5
O88703	756	O88703	O88703	Potassium/sodium hyperpolarization-activated cyclic nucleotide-gated channel 2	Hcn2	sp|O88703|HCN2_MOUSE Potassium/sodium hyperpolarization-activated cyclic nucleotide-gated channel 2 OS=Mus musculus OX=10090 GN=Hcn2 PE=1 SV=1	0.54248	0.763772	2.85e-19	109.79	101.19	109.79					0.54248	0.763772	2.85e-19	109.79		2	S	AASPGPPAASPPAAPSSPRAPRTSPYGVPGS	0	0	0	0	0	0	0	0
O88703	757	O88703	O88703	Potassium/sodium hyperpolarization-activated cyclic nucleotide-gated channel 2	Hcn2	sp|O88703|HCN2_MOUSE Potassium/sodium hyperpolarization-activated cyclic nucleotide-gated channel 2 OS=Mus musculus OX=10090 GN=Hcn2 PE=1 SV=1	0.422018	0	1.19e-10	85.044	75.557	85.044					0.422018	0	1.19e-10	85.044			S	ASPGPPAASPPAAPSSPRAPRTSPYGVPGSP	0	0	0	0	0	0	0	0
O88703	834	O88703	O88703	Potassium/sodium hyperpolarization-activated cyclic nucleotide-gated channel 2	Hcn2	sp|O88703|HCN2_MOUSE Potassium/sodium hyperpolarization-activated cyclic nucleotide-gated channel 2 OS=Mus musculus OX=10090 GN=Hcn2 PE=1 SV=1	0.978358	17.6026	2.09e-11	95.56	82.105	83.36	0.978358	17.6026	2.09e-11	95.56						2	S	TPRLGPAPTARTAAPSPDRRDSASPGAASGL	0	0	0	0	0	0	0	0
O88703	764	O88703	O88703	Potassium/sodium hyperpolarization-activated cyclic nucleotide-gated channel 2	Hcn2	sp|O88703|HCN2_MOUSE Potassium/sodium hyperpolarization-activated cyclic nucleotide-gated channel 2 OS=Mus musculus OX=10090 GN=Hcn2 PE=1 SV=1	0.546111	0.80897	0.00663038	50.897	25.338	50.897					0.546111	0.80897	0.00663038	50.897		2	S	ASPPAAPSSPRAPRTSPYGVPGSPATRVGPA	0	0	0	0	0	0	0	0
O88703	771	O88703	O88703	Potassium/sodium hyperpolarization-activated cyclic nucleotide-gated channel 2	Hcn2	sp|O88703|HCN2_MOUSE Potassium/sodium hyperpolarization-activated cyclic nucleotide-gated channel 2 OS=Mus musculus OX=10090 GN=Hcn2 PE=1 SV=1	0.999961	44.1318	3.1e-71	219.35	188.06	219.35	0.999961	44.1318	3.1e-71	219.35	0.999877	39.0968	6.65e-22	164.13		1;2	S	SSPRAPRTSPYGVPGSPATRVGPALPARRLS	6876.5	13451	9033.3	9822.5	4882.3	10398	4315.1	8527.8
O88704	69	O88704	O88704	Potassium/sodium hyperpolarization-activated cyclic nucleotide-gated channel 1	Hcn1	sp|O88704|HCN1_MOUSE Potassium/sodium hyperpolarization-activated cyclic nucleotide-gated channel 1 OS=Mus musculus OX=10090 GN=Hcn1 PE=1 SV=1	1	56.407	1.51e-23	152.88	121.37	56.407	1	56.407	1.51e-23	152.88						1	S	VCFKVDGGGGEEPAGSFEDAEGPRRQYGFMQ	2440	4355.2	2426.7	3680	1933.8	3623.1	2256.9	3512.8
O88705	33	O88705	O88705	Potassium/sodium hyperpolarization-activated cyclic nucleotide-gated channel 3	Hcn3	sp|O88705|HCN3_MOUSE Potassium/sodium hyperpolarization-activated cyclic nucleotide-gated channel 3 OS=Mus musculus OX=10090 GN=Hcn3 PE=1 SV=1	0.99865	28.692	9.95e-05	97.86	66.221	43.382	0.99865	28.692	0.0137496	43.382	0.981174	17.1698	9.95e-05	97.86		1	S	ARETPPAAPAQARAASGGVPESAPEPKRRQL	332.85	501.81	201.73	359.83	311.51	339.2	212.07	461.47
O88705	720	O88705	O88705	Potassium/sodium hyperpolarization-activated cyclic nucleotide-gated channel 3	Hcn3	sp|O88705|HCN3_MOUSE Potassium/sodium hyperpolarization-activated cyclic nucleotide-gated channel 3 OS=Mus musculus OX=10090 GN=Hcn3 PE=1 SV=1	0.917802	10.5425	0.00124621	73.466	56.69	73.466					0.917802	10.5425	0.00124621	73.466		1	S	GGARRLGPRGRPLSASQPSLPQRATGDGSPR	0	0	0	0	0	0	0	0
O88705	648	O88705	O88705	Potassium/sodium hyperpolarization-activated cyclic nucleotide-gated channel 3	Hcn3	sp|O88705|HCN3_MOUSE Potassium/sodium hyperpolarization-activated cyclic nucleotide-gated channel 3 OS=Mus musculus OX=10090 GN=Hcn3 PE=1 SV=1	0.99988	39.2037	2.87e-07	110.38	93.354	110.38					0.99988	39.2037	2.87e-07	110.38		1	S	SPDSPATLLARSARRSAGSPASPLVPVRAGP	0	0	0	0	0	0	0	0
O88705	651	O88705	O88705	Potassium/sodium hyperpolarization-activated cyclic nucleotide-gated channel 3	Hcn3	sp|O88705|HCN3_MOUSE Potassium/sodium hyperpolarization-activated cyclic nucleotide-gated channel 3 OS=Mus musculus OX=10090 GN=Hcn3 PE=1 SV=1	0.912726	10.3063	0.000551766	80.17	59.382	80.17					0.912726	10.3063	0.000551766	80.17		1	S	SPATLLARSARRSAGSPASPLVPVRAGPLLA	0	0	0	0	0	0	0	0
O88705	654	O88705	O88705	Potassium/sodium hyperpolarization-activated cyclic nucleotide-gated channel 3	Hcn3	sp|O88705|HCN3_MOUSE Potassium/sodium hyperpolarization-activated cyclic nucleotide-gated channel 3 OS=Mus musculus OX=10090 GN=Hcn3 PE=1 SV=1	0.981048	17.9889	0.000964793	71.241	43.499	71.241					0.981048	17.9889	0.000964793	71.241		1	S	TLLARSARRSAGSPASPLVPVRAGPLLARGP	0	0	0	0	0	0	0	0
O88737	121	O88737	O88737	Protein bassoon	Bsn	sp|O88737|BSN_MOUSE Protein bassoon OS=Mus musculus OX=10090 GN=Bsn PE=1 SV=4	0.999969	45.0433	0.00115215	68.809	36.311	56.959	0.999969	45.0433	0.00115215	68.809						1	S	PRETRAQGPSGQEAESPRRTLQVDSRTQRSG	434.08	1671.5	84.35	452.24	549.47	540.72	628.1	863.18
O88737	3022	O88737	O88737	Protein bassoon	Bsn	sp|O88737|BSN_MOUSE Protein bassoon OS=Mus musculus OX=10090 GN=Bsn PE=1 SV=4	0.993115	21.5907	6.7e-34	184.34	154.14	69.398	0.983345	17.7116	6.7e-34	184.34	0.993115	21.5907	0.000106171	69.398		1	S	DYPPLRGLGEHRDYLSDSELNQLRLQGCTTP	2655.2	5948.8	2929.1	3495.2	4001.9	4173.8	3513.5	3489.4
O88737	3382	O88737	O88737	Protein bassoon	Bsn	sp|O88737|BSN_MOUSE Protein bassoon OS=Mus musculus OX=10090 GN=Bsn PE=1 SV=4	1	125.747	0.000204164	125.75	89.053	125.75	1	125.747	0.000204164	125.75	1	122.962	0.000275868	122.96		1	S	SKHRKQGMEQKISKFSPIEEAKDVESDLASY	25680	33088	1948.1	28124	25175	32883	20394	35056
O88737	1008	O88737	O88737	Protein bassoon	Bsn	sp|O88737|BSN_MOUSE Protein bassoon OS=Mus musculus OX=10090 GN=Bsn PE=1 SV=4	0.188343	0	1.81e-21	93.359	82.728	93.359					0.188343	0	1.81e-21	93.359			S	LPASTPSYTSGTSPTSLSSLEEDSDSSPSRR	0	0	0	0	0	0	0	0
O88737	1010	O88737	O88737	Protein bassoon	Bsn	sp|O88737|BSN_MOUSE Protein bassoon OS=Mus musculus OX=10090 GN=Bsn PE=1 SV=4	0.188343	0	1.81e-21	93.359	82.728	93.359					0.188343	0	1.81e-21	93.359			S	ASTPSYTSGTSPTSLSSLEEDSDSSPSRRQR	0	0	0	0	0	0	0	0
O88737	1011	O88737	O88737	Protein bassoon	Bsn	sp|O88737|BSN_MOUSE Protein bassoon OS=Mus musculus OX=10090 GN=Bsn PE=1 SV=4	0.188343	0	1.81e-21	93.359	82.728	93.359					0.188343	0	1.81e-21	93.359			S	STPSYTSGTSPTSLSSLEEDSDSSPSRRQRL	0	0	0	0	0	0	0	0
O88737	1016	O88737	O88737	Protein bassoon	Bsn	sp|O88737|BSN_MOUSE Protein bassoon OS=Mus musculus OX=10090 GN=Bsn PE=1 SV=4	0.331599	6.67456	3.52e-29	98.197	82.122	63.403	0.231024	0.790055	3.52e-29	98.197	0.331599	6.67456	2.73e-10	63.403			S	TSGTSPTSLSSLEEDSDSSPSRRQRLEEAKQ	0	0	0	0	0	0	0	0
O88737	1018	O88737	O88737	Protein bassoon	Bsn	sp|O88737|BSN_MOUSE Protein bassoon OS=Mus musculus OX=10090 GN=Bsn PE=1 SV=4	0.398585	0	1.77e-29	119.52	98.655	70.428	0.336656	0	1.55e-15	82.684	0.398585	0	1.77e-29	119.52			S	GTSPTSLSSLEEDSDSSPSRRQRLEEAKQQR	0	0	0	0	0	0	0	0
O88737	1019	O88737	O88737	Protein bassoon	Bsn	sp|O88737|BSN_MOUSE Protein bassoon OS=Mus musculus OX=10090 GN=Bsn PE=1 SV=4	0.398585	0	1.55e-15	82.684	67.29	70.428	0.336656	0	1.55e-15	82.684	0.398585	0	3.05e-10	70.428			S	TSPTSLSSLEEDSDSSPSRRQRLEEAKQQRK	0	0	0	0	0	0	0	0
O88737	1482	O88737	O88737	Protein bassoon	Bsn	sp|O88737|BSN_MOUSE Protein bassoon OS=Mus musculus OX=10090 GN=Bsn PE=1 SV=4	0.85313	8.31316	4.94e-22	131.84	117.57	131.84	0.85313	8.31316	4.94e-22	131.84	0.383533	2.71985	4.87e-08	70.073		1;2	S	GAPQPSRGYSYFTGSSPPLSPSTPSESPTFS	1295	2339.2	1607.7	1918.1	1968.9	2090.1	1510.7	2188.6
O88737	1486	O88737	O88737	Protein bassoon	Bsn	sp|O88737|BSN_MOUSE Protein bassoon OS=Mus musculus OX=10090 GN=Bsn PE=1 SV=4	0.570149	6.06762	4.23e-11	92.147	82.335	92.147					0.570149	6.06762	4.23e-11	92.147		1	S	PSRGYSYFTGSSPPLSPSTPSESPTFSPGKL	0	0	0	0	0	0	0	0
O88737	1493	O88737	O88737	Protein bassoon	Bsn	sp|O88737|BSN_MOUSE Protein bassoon OS=Mus musculus OX=10090 GN=Bsn PE=1 SV=4	0.674655	4.0633	4.94e-22	131.84	117.57	70.073	0.642239	3.12581	4.94e-22	131.84	0.674655	4.0633	4.87e-08	70.073		2	S	FTGSSPPLSPSTPSESPTFSPGKLGPRATAE	0	0	0	0	0	0	0	0
O88737	2029	O88737	O88737	Protein bassoon	Bsn	sp|O88737|BSN_MOUSE Protein bassoon OS=Mus musculus OX=10090 GN=Bsn PE=1 SV=4	0.99932	31.6729	4.7e-06	103.44	86.499	99.844	0.99932	31.6729	4.7e-06	103.44	0.998773	29.1068	0.000845551	76.728		1	S	GRDSAVDLSSLKHSYSLGFADGRYLGQGLQY	2141.3	4274.6	2199.2	3851.9	1403.8	2288.5	1424.3	2405
O88737	2591	O88737	O88737	Protein bassoon	Bsn	sp|O88737|BSN_MOUSE Protein bassoon OS=Mus musculus OX=10090 GN=Bsn PE=1 SV=4	0.333333	0	0.0388517	43.791	32.521	43.791	0.333333	0	0.0388517	43.791							S	PESGPDPSTVRRIADSSVQTDDEEGEGRYLV	0	0	0	0	0	0	0	0
O88737	2592	O88737	O88737	Protein bassoon	Bsn	sp|O88737|BSN_MOUSE Protein bassoon OS=Mus musculus OX=10090 GN=Bsn PE=1 SV=4	0.333333	0	0.0388517	43.791	32.521	43.791	0.333333	0	0.0388517	43.791							S	ESGPDPSTVRRIADSSVQTDDEEGEGRYLVT	0	0	0	0	0	0	0	0
O88737	3379	O88737	O88737	Protein bassoon	Bsn	sp|O88737|BSN_MOUSE Protein bassoon OS=Mus musculus OX=10090 GN=Bsn PE=1 SV=4	0.869015	8.21807	0.00794553	49.31	30.714	49.31					0.869015	8.21807	0.00794553	49.31		1	S	SKRSKHRKQGMEQKISKFSPIEEAKDVESDL	0	0	0	0	0	0	0	0
O88737	2822	O88737	O88737	Protein bassoon	Bsn	sp|O88737|BSN_MOUSE Protein bassoon OS=Mus musculus OX=10090 GN=Bsn PE=1 SV=4	0.999006	30.0206	1.66e-69	221.55	188.49	221.55	0.999006	30.0206	1.66e-69	221.55	0.879211	8.63138	1.79e-06	107.85		1	S	VSPLSPHRLLDTSFASSERLNKAHVSPQKQF	1537.6	4175.8	2259.4	1503.3	3091.8	4111.4	5069.9	2742.1
O88737	2578	O88737	O88737	Protein bassoon	Bsn	sp|O88737|BSN_MOUSE Protein bassoon OS=Mus musculus OX=10090 GN=Bsn PE=1 SV=4	0.998283	30.6546	0.000126843	78.708	52.842	78.708	0.998283	30.6546	0.000126843	78.708						1	S	KRHSMPRLRDACEPESGPDPSTVRRIADSSV	1664.3	1863.7	1516	1581.4	1119.9	1351.6	957.8	1184.3
O88737	1988	O88737	O88737	Protein bassoon	Bsn	sp|O88737|BSN_MOUSE Protein bassoon OS=Mus musculus OX=10090 GN=Bsn PE=1 SV=4	0.46756	0	0.00030434	59.185	51.381	59.185	0.46756	0	0.00030434	59.185							S	EQRPYPQGLPGRLYSSMSDTNLAEAGLNYHA	0	0	0	0	0	0	0	0
O88737	1990	O88737	O88737	Protein bassoon	Bsn	sp|O88737|BSN_MOUSE Protein bassoon OS=Mus musculus OX=10090 GN=Bsn PE=1 SV=4	0.938679	13.5453	5.54e-23	145.55	132.61	129.84	0.938679	13.5453	9.15e-13	129.84	0.842289	7.90535	5.54e-23	145.55		1	S	RPYPQGLPGRLYSSMSDTNLAEAGLNYHAQR	284.11	500.29	185.36	602.14	95.832	442.33	83.723	101.76
O88737	3460	O88737	O88737	Protein bassoon	Bsn	sp|O88737|BSN_MOUSE Protein bassoon OS=Mus musculus OX=10090 GN=Bsn PE=1 SV=4	0.999978	46.5955	0.00180019	79.201	64.684	79.201	0.999978	46.5955	0.00180019	79.201						1	S	RMYGSSSRSRMASAYSGEKLSSHDYSSRGKG	9242.6	14304	3002	8741.1	6798.1	5819.7	5955.7	6656.7
O88737	2866	O88737	O88737	Protein bassoon	Bsn	sp|O88737|BSN_MOUSE Protein bassoon OS=Mus musculus OX=10090 GN=Bsn PE=1 SV=4	0.977525	16.4388	7.5e-94	229.98	211.22	74.611	0.977525	16.4388	7.5e-94	229.98	0.906296	10.0909	8.15e-16	143.47		1;2	S	PMKTLQRSLSDPKPLSPTAEESAKERFSLYQ	2310.9	3612.3	1528.8	2780.2	1774.2	3312.1	1911.8	2662.2
O88737	865	O88737	O88737	Protein bassoon	Bsn	sp|O88737|BSN_MOUSE Protein bassoon OS=Mus musculus OX=10090 GN=Bsn PE=1 SV=4	0.999752	39.073	3.56e-05	57.804	42.714	57.804	0.999752	39.073	3.56e-05	57.804						1	S	DMTDEEFMRRQILEMSAEEDNLEEDDTAVSG	0	338.16	111.32	294.6	0	0	119.78	164.54
O88737	817	O88737	O88737	Protein bassoon	Bsn	sp|O88737|BSN_MOUSE Protein bassoon OS=Mus musculus OX=10090 GN=Bsn PE=1 SV=4	0.495368	0	0.00114136	48.112	38.055	48.112	0.495368	0	0.00114136	48.112							S	SLAWGRQREQQDTAESSDDFGSQLRHDYVED	0	0	0	0	0	0	0	0
O88737	818	O88737	O88737	Protein bassoon	Bsn	sp|O88737|BSN_MOUSE Protein bassoon OS=Mus musculus OX=10090 GN=Bsn PE=1 SV=4	0.495368	0	0.00114136	48.112	38.055	48.112	0.495368	0	0.00114136	48.112							S	LAWGRQREQQDTAESSDDFGSQLRHDYVEDS	0	0	0	0	0	0	0	0
O88737	3158	O88737	O88737	Protein bassoon	Bsn	sp|O88737|BSN_MOUSE Protein bassoon OS=Mus musculus OX=10090 GN=Bsn PE=1 SV=4	0.971245	15.2862	5.13e-14	130.15	91.574	130.15	0.894372	9.27737	7.49e-05	96.64	0.971245	15.2862	5.13e-14	130.15		1	S	VQADSRAAHQKPRQTSLADLEQKVPTNYEVI	8334.5	11328	2776.8	9589.7	5560.6	5330.7	3886.1	6829.3
O88737	1100	O88737	O88737	Protein bassoon	Bsn	sp|O88737|BSN_MOUSE Protein bassoon OS=Mus musculus OX=10090 GN=Bsn PE=1 SV=4	0.44257	0	0.00667483	42.121	31.606	42.121	0.44257	0	0.00667483	42.121							S	RRDKEELRAQRRRERSKTPPSNLSPIEDASP	0	0	0	0	0	0	0	0
O88737	1108	O88737	O88737	Protein bassoon	Bsn	sp|O88737|BSN_MOUSE Protein bassoon OS=Mus musculus OX=10090 GN=Bsn PE=1 SV=4	0.992002	21.0573	8.8e-41	174.78	138.45	174.78	0.992002	21.0573	8.8e-41	174.78	0.974978	16.5995	3.31e-05	84.035		1;2	S	AQRRRERSKTPPSNLSPIEDASPTEELRQAA	1803.6	4166.9	1611	2348.6	3634.8	3119.4	4652.2	2775.5
O88737	1114	O88737	O88737	Protein bassoon	Bsn	sp|O88737|BSN_MOUSE Protein bassoon OS=Mus musculus OX=10090 GN=Bsn PE=1 SV=4	0.997771	26.5369	8.24e-74	211.33	163.79	204.86	0.983592	17.7936	8.24e-74	211.33	0.997771	26.5369	4.42e-65	204.86		1;2	S	RSKTPPSNLSPIEDASPTEELRQAAEMEELH	2257.8	6853.4	3022.7	2626.7	6877	4891.6	6791.5	4172.5
O88737	2858	O88737	O88737	Protein bassoon	Bsn	sp|O88737|BSN_MOUSE Protein bassoon OS=Mus musculus OX=10090 GN=Bsn PE=1 SV=4	0.898821	9.49863	7.5e-94	229.98	211.22	229.98	0.898821	9.49863	7.5e-94	229.98	0.549089	0.855914	5.11e-05	94.632		1;2	S	LRQQTLPRPMKTLQRSLSDPKPLSPTAEESA	2326.4	4169.7	2314.8	2713.5	1927.2	2188.5	1936.7	1942.7
O88737	2860	O88737	O88737	Protein bassoon	Bsn	sp|O88737|BSN_MOUSE Protein bassoon OS=Mus musculus OX=10090 GN=Bsn PE=1 SV=4	0.992602	21.2768	3.01e-67	209.71	197.67	209.71	0.812963	6.38148	1.02e-29	165.58	0.992602	21.2768	3.01e-67	209.71		1;2	S	QQTLPRPMKTLQRSLSDPKPLSPTAEESAKE	6065.7	10400	7519.6	6274.4	5003.7	6830.5	3898.5	4840.5
O88737	2811	O88737	O88737	Protein bassoon	Bsn	sp|O88737|BSN_MOUSE Protein bassoon OS=Mus musculus OX=10090 GN=Bsn PE=1 SV=4	0.986057	18.5083	2.06e-06	115.5	101.24	115.5	0.839854	7.52272	0.000773749	57.496	0.986057	18.5083	2.06e-06	115.5		1	S	PPKSPQVLYSPVSPLSPHRLLDTSFASSERL	0	109.81	0	0	0	161.24	84.278	0
[truncated: 9,360 more rows]

## Sheet: Cortex Stats
	Index	Protein	Label	log2FC	SE	pvalue	Protein_only	gene_name	FDR
[truncated: 9,479 more rows]

[truncated: 3 more sheets: SIK1 Overlap Wang Bruning, Sik1_Cortex_phosphoprot_GO, KSEA Cortex]
